# Supplementary material for: Enantioselective synthesis of axially chiral carbamates and amides with carbon dioxide via copper catalysis
Source: Royal Society of Chemistry journal article supplement (doi:10.1039/d3qo01176c), 2023-01-01
Supplement: d3qo01176c1.pdf [file d3qo01176c1.pdf]

# Supporting Information

## Enantioselective Synthesis of Axially Chiral Carbamates and Amides with Carbon Dioxide via Copper Catalysis

Bangxiong Kang, Lu Wang, Xihu Sun, Hongjian Liu, Zhonglin Wen, Yanwei Ren, Chaorong Qi\*  
and Huanfeng Jiang\*

Key Lab of Functional Molecular Engineering of Guangdong Province, School of Chemistry and  
Chemical Engineering, South China University of Technology,  
Guangzhou 510640, China

*E-mail: crqi@scut.edu.cn or jianghf@scut.edu.cn*

### List of contents

|           |                                                                              |             |
|-----------|------------------------------------------------------------------------------|-------------|
| <b>A.</b> | <b>General methods .....</b>                                                 | <b>S2</b>   |
| <b>B.</b> | <b>General procedure for the synthesis of axially chiral carbamates.....</b> | <b>S2</b>   |
| <b>C.</b> | <b>General procedure for the synthesis of axially chiral amides.....</b>     | <b>S2</b>   |
| <b>D.</b> | <b>Optimization of the reaction conditions .....</b>                         | <b>S4</b>   |
| <b>E.</b> | <b>Gram-scale synthesis of compound 3 .....</b>                              | <b>S4</b>   |
| <b>F.</b> | <b>Gram-scale synthesis of compound 61 .....</b>                             | <b>S5</b>   |
| <b>G.</b> | <b>Procedures for the synthesis of compounds 91-104.....</b>                 | <b>S5</b>   |
| <b>H.</b> | <b>Analytical data.....</b>                                                  | <b>S12</b>  |
| <b>I.</b> | <b>Crystal data and structure refinement.....</b>                            | <b>S52</b>  |
| <b>J.</b> | <b>Copies of NMR spectroscopies.....</b>                                     | <b>S58</b>  |
| <b>K.</b> | <b>Copies of HPLC traces.....</b>                                            | <b>S167</b> |

## A. General methods

All cyclic diaryliodonium salts **1** were synthesized according to previously described methods.<sup>1</sup> Ligand **L1-L8** were purchased from DAICEL CHIRAL TECHNOLOGIES (CHINA) CO. LTD. Other reagents were obtained from commercial suppliers (Aldrich, TCI, Across, etc.) and used without further purification. <sup>1</sup>H and <sup>13</sup>C NMR spectra were recorded with a Bruker AV 400 spectrometer using CDCl<sub>3</sub> or DMSO-*d*<sub>6</sub> as solvent and TMS as an internal standard. Reference values for residual solvents were taken as  $\delta = 7.26$  ppm (CDCl<sub>3</sub>), 2.50 ppm (DMSO-*d*<sub>6</sub>) for <sup>1</sup>H NMR;  $\delta = 77.00$  ppm (CDCl<sub>3</sub>),  $\delta = 40.00$  ppm (DMSO-*d*<sub>6</sub>) for <sup>13</sup>C NMR. Multiplicity was indicated as follows: s (singlet), d (doublet), t (triplet), q (quartet), m (multiplet). Coupling constants were given in Hertz (Hz). IR spectra were obtained as potassium bromide pellets between two potassium bromide pellets with a spectrometer. The data of HRMS was determined on a high-resolution mass spectrometer (LCMS-IT-TOF). X-ray structural analyses were conducted on an x-ray analysis instrument. Reactions were monitored by thin-layer chromatography (TLC) using UV light. Chiral HPLC analyses were performed on an Agilent 1200 system.

## B. General procedure for the synthesis of axially chiral carbamates

To a 25 mL oven-dried Schlenk tube equipped with a magnetic stirring bar was added **1** (0.10 mmol), Cu(OTf)<sub>2</sub> (36.0 mg, 0.01 mmol), **L6** (36.0 mg, 0.01 mmol) and Na<sub>2</sub>CO<sub>3</sub> (15.9 mg, 0.15 mmol) successively. The Schlenk tube was capped with a rubber septum, evacuated and backfilled with 1 atm CO<sub>2</sub>. This evacuation/backfill sequence was repeated three times. Then, a solution of **2** in anhydrous 1,4-dioxane (0.167 M, 1.5 mL, 0.25 mmol) was added to the vessel by syringe through the rubber septum cap. The mixture was then stirred at 40 °C in an oil bath for 12 h. After the reaction was completed, the reaction mixture was cooled to room temperature, filtered through a plug of celite and washed with ethyl acetate. The filtrate was concentrated under vacuum and the residue was purified by column chromatography on silica gel using petroleum ether/ethyl acetate as the eluent to give the desired product.

## C. General procedure for the synthesis of axially chiral amides

To a 25 mL oven-dried Schlenk tube equipped with a magnetic stirring bar was added **1** (0.10 mmol), Cu(OTf)<sub>2</sub> (36.0 mg, 0.01 mmol), **L6** (36.0 mg, 0.01 mmol), Na<sub>2</sub>CO<sub>3</sub> (15.9 mg, 0.15 mmol) successively. The Schlenk tube was capped with a rubber septum, evacuated and backfilled with 1 atm of CO<sub>2</sub>. This evacuation/backfill sequence was repeated three times. Then, a solution of **2** in anhydrous tetrahydrofuran (0.125 M, 2.0 mL, 0.25 mmol) was added to the vessel by syringe

through the rubber septum cap. The mixture was stirred at 40 °C in an oil bath for 12 h. Then, the reaction mixture was cooled to room temperature, evacuated and backfilled with nitrogen; this evacuation/backfill sequence was also repeated three times. After the reaction mixture was cooled to 0 °C, a solution of *n*-butyl lithium in hexane (2.5 M, 0.2 mL, 0.5 mmol) was added dropwise to the above mixture by a syringe. Then, the reaction mixture was allowed to warm to room temperature and stirred for 12 h. After the reaction was completed, the reaction mixture was quenched with 2 M HCl aqueous solution (6 mL), and extracted with ethyl acetate (10 mL × 3). The combined organic layers were washed with brine, dried over anhydrous Na<sub>2</sub>SO<sub>4</sub>, filtered and concentrated under vacuum. The residue was purified by column chromatography on silica gel using petroleum ether/ethyl acetate as the eluent to give the desired product.

## D. Optimization of the reaction conditions

**Table S1.** The influence of different solvents, bases and temperatures on the reaction<sup>a</sup>

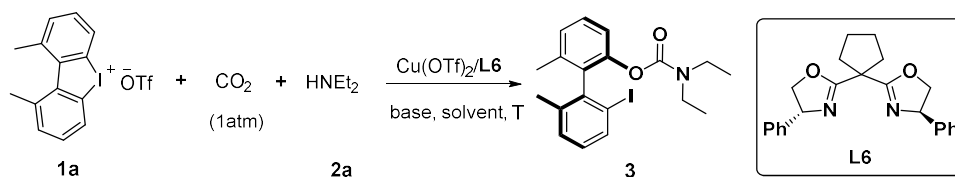

| Entry           | Catalyst             | Base                            | Solvent     | Yield (%) <sup>b</sup> | ee (%) <sup>c</sup> |
|-----------------|----------------------|---------------------------------|-------------|------------------------|---------------------|
| 1               | Cu(OTf) <sub>2</sub> | Na <sub>2</sub> CO <sub>3</sub> | 1,4-dioxane | 95 (92)                | 99                  |
| 2               | Cu(OTf) <sub>2</sub> | Na <sub>2</sub> CO <sub>3</sub> | THF         | 94                     | 99                  |
| 3               | Cu(OTf) <sub>2</sub> | Na <sub>2</sub> CO <sub>3</sub> | DCM         | 65                     | 98                  |
| 4               | Cu(OTf) <sub>2</sub> | Na <sub>2</sub> CO <sub>3</sub> | MeCN        | 86                     | 98                  |
| 5               | Cu(OTf) <sub>2</sub> | Na <sub>2</sub> CO <sub>3</sub> | Toluene     | 70                     | 98                  |
| 6               | Cu(OTf) <sub>2</sub> | DABCO                           | 1,4-dioxane | 56                     | 82                  |
| 7               | Cu(OTf) <sub>2</sub> | Et <sub>2</sub> ONa             | 1,4-dioxane | 63                     | 97                  |
| 8               | Cu(OTf) <sub>2</sub> | <i>t</i> -BuOK                  | 1,4-dioxane | 64                     | 93                  |
| 9               | Cu(OTf) <sub>2</sub> | Cs <sub>2</sub> CO <sub>3</sub> | 1,4-dioxane | 58                     | 97                  |
| 10 <sup>d</sup> | Cu(OTf) <sub>2</sub> | Na <sub>2</sub> CO <sub>3</sub> | 1,4-dioxane | 81                     | 98                  |
| 11 <sup>e</sup> | Cu(OTf) <sub>2</sub> | Na <sub>2</sub> CO <sub>3</sub> | 1,4-dioxane | 77                     | 97                  |
| 12 <sup>f</sup> | Cu(OTf) <sub>2</sub> | Na <sub>2</sub> CO <sub>3</sub> | 1,4-dioxane | 90                     | 98                  |
| 13 <sup>g</sup> | Cu(OTf) <sub>2</sub> | Na <sub>2</sub> CO <sub>3</sub> | 1,4-dioxane | 95                     | 98                  |
| 14              | CuSO <sub>4</sub>    | Na <sub>2</sub> CO <sub>3</sub> | 1,4-dioxane | 89                     | 95                  |
| 15              | Cu(OAc) <sub>2</sub> | Na <sub>2</sub> CO <sub>3</sub> | 1,4-dioxane | 84                     | 96                  |

<sup>a</sup> Reaction conditions: **1a** (0.10 mmol), **2a** (0.25 mmol), CO<sub>2</sub> (1 atm), base (1.5 equiv), Cu(OTf)<sub>2</sub> (0.01 mmol), L6 (0.01 mmol), solvent (anhydrous, 1.5 mL), 40 °C, 12 h. <sup>b</sup>Yields were determined by <sup>1</sup>H NMR using dibromomethane as internal standard. The number in parentheses is isolated yield.

<sup>c</sup>Determined by chiral HPLC. <sup>d</sup>60 °C. <sup>e</sup>100 °C. <sup>f</sup>Base (2 equiv). <sup>g</sup>Base (1 equiv).

## E. Gram-scale synthesis of compound 3

To a 100 mL oven-dried two-necked round flask containing a magnetic stir bar was added **1a** (5.0 mmol), Cu(OTf)<sub>2</sub> (0.5 mmol), **L6** (0.5 mmol) and Na<sub>2</sub>CO<sub>3</sub> (7.5 mmol) successively. The side-neck

was capped with a rubber septum and the central neck is connected with a CO<sub>2</sub> balloon via a 3-way valve. Then, the flask was evacuated and backfilled with CO<sub>2</sub> through the 3-way valve. Subsequently, a solution of diethylamine (**2a**) in anhydrous 1,4-dioxane (0.25 M, 50 mL, 12.5 mmol) was added to the flask by syringe through the rubber septum cap on the side-neck. The mixture was stirred at 40 °C in an oil bath for 12 h. After the reaction was completed, the reaction mixture was filtered through a plug of celite and washed with ethyl acetate. The filtrate was concentrated under vacuum and the residue was purified by column chromatography on silica gel using petroleum ether/ethyl acetate (20:1) as the eluent to give the product **3** as a light yellow oil (1.94 g, 92%, 96% ee).

## F. Gram-scale synthesis of compound **61**

To a 50 mL oven-dried two-necked round flask containing a magnetic stir bar was added **1a** (1.7 mmol), Cu(OTf)<sub>2</sub> (0.17 mmol), **L6** (0.255 mmol) and Na<sub>2</sub>CO<sub>3</sub> (1.7 mmol) successively. The side-neck was capped with a rubber septum and the central neck is connected with a CO<sub>2</sub> balloon via a 3-way valve. Then, the flask was evacuated and backfilled with CO<sub>2</sub> through the 3-way valve. Subsequently, a solution of Sitagliptin in anhydrous MeCN (0.213 M, 20 mL, 4.25 mmol) was added to the flask by syringe through the rubber septum cap on the side-neck. The mixture was stirred at 40 °C in an oil bath for 12 h. After the reaction was completed, the reaction mixture was filtered through a plug of celite and washed with ethyl acetate. The filtrate was concentrated under vacuum and the residue was purified by column chromatography on silica gel using petroleum ether/ethyl acetate (2:1) as the eluent to give the product **61** as a light yellow oil (0.99 g, 77%, 97% de).

## G. Procedures for the synthesis of compounds **91-104**

### a) Procedure for the synthesis of compound **91**<sup>ref.1a</sup>

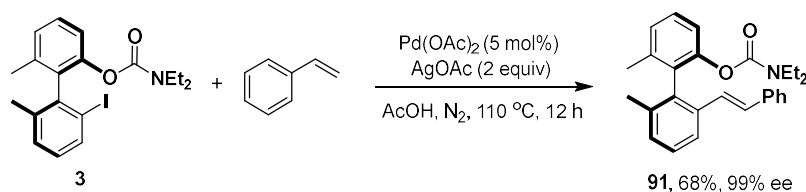

To a solution of styrene (12.5 mg, 0.12 mmol) in AcOH (2.0 mL) was added the mixture of **3** (0.1 mmol, 99% ee), Pd(OAc)<sub>2</sub> (1.2 mg, 0.005 mmol), AgOAc (33.4 mg, 0.2 mmol) successively. The resulting mixture was stirred at 110 °C in an oil bath for 12 h under an atmosphere of N<sub>2</sub>. After the

reaction was completed, the reaction mixture was cooled to room temperature, washed with water and then extracted with ethyl acetate (10 mL×3). The combined organic phase was dried over anhydrous Na<sub>2</sub>SO<sub>4</sub>, and then filtered. After removing the solvent under vacuum, the crude product was purified by column chromatography on silica gel using petroleum ether/ethyl acetate (20:1) as the eluent to give the desired product as a light yellow oil **91** (27.2 mg, 68%, 99% ee).

**b) Procedure for the synthesis of compound 92**<sup>ref.2</sup>

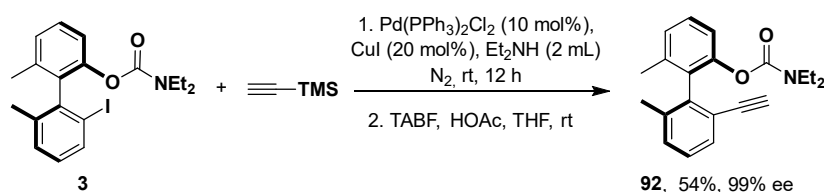

To a solution of **3** (0.1 mmol, 99% ee) and trimethylsilylacetylene (24.5 mg, 0.25 mmol) in Et<sub>2</sub>NH (2.0 mL) was added the mixture of Pd(PPh<sub>3</sub>)<sub>2</sub>Cl<sub>2</sub> (7.1 mg, 0.01 mmol) and CuI (3.8 mg, 0.02 mmol) successively. The resulting mixture was stirred at room temperature for 12 h under an atmosphere of N<sub>2</sub>. After the reaction was completed, the reaction mixture was cooled to room temperature, washed with water and then extracted with ethyl acetate (10 mL×3). The combined organic phase was dried over anhydrous Na<sub>2</sub>SO<sub>4</sub>, and then filtered. After removing the solvent under vacuum, the crude product was purified by column chromatography on silica gel using petroleum ether/ethyl acetate (20:1) as the eluent to give a light yellow oil (21.2 mg). Then, the light yellow oil was treated with HOAc (0.1 mL) and TBAF (0.2 mL) in THF (2.0 mL) at room temperature for 4 h. The reaction mixture was washed with water and then extracted with ethyl acetate (10 mL×3). The combined organic phase was dried over anhydrous Na<sub>2</sub>SO<sub>4</sub>, and then filtered. After removing the solvent under vacuum, the crude product was purified by column chromatography on silica gel using petroleum ether/ethyl acetate (20:1) as the eluent to give the desired product **92** as a light yellow oil (15.8 mg, 54%, 99% ee).

**c) Procedure for the synthesis of compound 93**<sup>ref.2</sup>

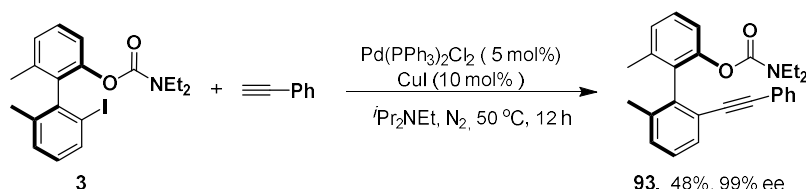

To a solution of phenylacetylene (12.3 mg, 0.12 mmol) in *N,N*-diisopropylethylamine (2.0 mL) was added the mixture of **3** (0.1 mmol, 99% ee), Pd(PPh<sub>3</sub>)<sub>2</sub>Cl<sub>2</sub> (3.6 mg, 0.005 mmol) and CuI (2.0 mg, 0.01 mmol) successively. The resulting mixture was stirred at 100 °C in an oil bath for 12 h

under an atmosphere of N<sub>2</sub>. After the reaction was completed, the reaction mixture was cooled to room temperature, washed with water and then extracted with ethyl acetate (10 mL×3). The combined organic phase was dried over anhydrous Na<sub>2</sub>SO<sub>4</sub>, and then filtered. After removing the solvent under vacuum, the crude product was purified by column chromatography on silica gel using petroleum ether/ethyl acetate (20:1) as the eluent to give the desired product **93** as a light yellow oil (19.1 mg, 48%, 99% ee).

**d) Procedure for the synthesis of compound **94****<sup>ref.1a</sup>

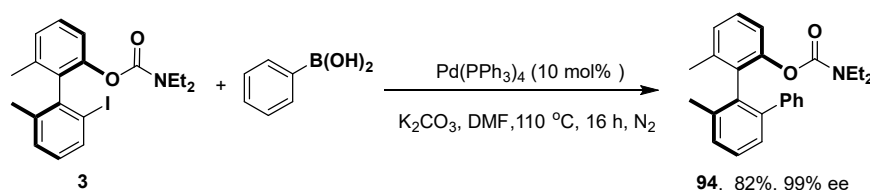

To a solution of **3** (0.1 mmol, 99% ee) in DMF (2.0 mL) was added the mixture of phenylboronic acid (18.3 mg, 0.15 mmol), Pd(PPh<sub>3</sub>)<sub>4</sub> (11.6 mg, 0.01 mmol) and K<sub>2</sub>CO<sub>3</sub> (20.8 mg, 0.15 mmol) successively. The resulting mixture was stirred at 110 °C in an oil bath for 16 h under an atmosphere of N<sub>2</sub>. After the reaction was completed, the reaction mixture was cooled to room temperature, washed with water and then extracted with ethyl acetate (10 mL×3). The combined organic phase was dried over anhydrous Na<sub>2</sub>SO<sub>4</sub>, and then filtered. After removing the solvent under vacuum, the crude product was purified by column chromatography on silica gel using petroleum ether/ethyl acetate (20:1) as the eluent to give the desired product **94** as a light yellow oil (30.6 mg, 82%, 99% ee).

**e) Procedure for the synthesis of compound **95****<sup>ref.4</sup>

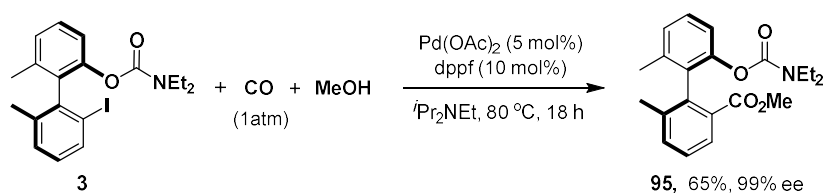

To a 25 mL oven-dried Schlenk tube equipped with a magnetic stirring bar was added **3** (0.1 mmol), Pd(OAc)<sub>2</sub> (1.2 mg, 0.005 mmol), 1,1'-ferrocenediyl-bis(diphenylphosphine) (dppe) (5.6 mg, 0.01 mmol), methanol (2.0 mL) and *N,N*-diisopropylethylamine (25.9 mg, 0.2 mmol) successively. The tube was then evacuated and refilled with CO (1 atm) three times. The resulting mixture was stirred at 80 °C in an oil bath for 18 h. After the reaction was completed, the reaction mixture was cooled to room temperature, washed with water and then extracted with ethyl acetate (10 mL×3). The combined organic phase was dried over anhydrous Na<sub>2</sub>SO<sub>4</sub>, and then filtered.

After removing the solvent under vacuum, the crude product was purified by column chromatography on silica gel using petroleum ether/ethyl acetate (10:1) as the eluent to give the desired product as a light yellow oil **95** (23.1 mg, 65%, 99% ee).

**f) Procedure for the synthesis of compound 96** <sup>ref.3</sup>

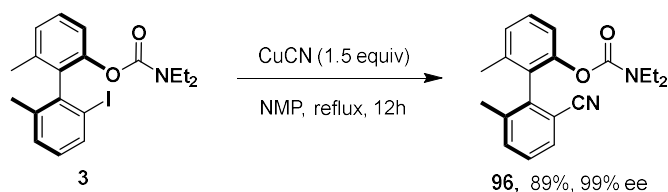

To a solution of **3** (0.1 mmol, 99% ee) in NMP (2 ml) was added CuCN (13.4mg, 0.15 mmol). The resulting mixture was heated at reflux in an oil bath for 12 h under an atmosphere of N<sub>2</sub>. After the reaction was completed, the reaction mixture was cooled to room temperature, washed with water and then extracted with ethyl acetate (10 mL×3). The combined organic phase was dried over anhydrous Na<sub>2</sub>SO<sub>4</sub>, and then filtered. After removing the solvent under vacuum, the crude product was purified by column chromatography on silica gel using petroleum ether/ethyl acetate (10:1) as the eluent to give the desired product **96** as a light yellow oil (28.6 mg, 89%, 99% ee).

**g) Procedure for the synthesis of compound 97** <sup>ref.7</sup>

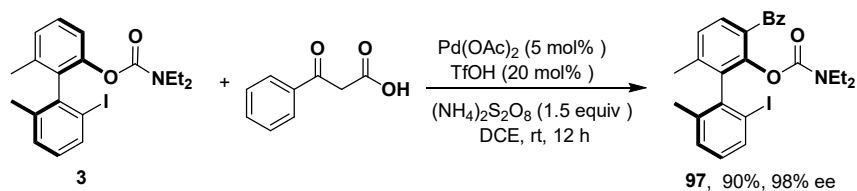

To a 25 mL oven-dried Schlenk tube was charged with **3** (0.1 mmol, 99% ee), phenylglyoxylic acid (19.7 mg, 0.12 mmol), Pd(OAc)<sub>2</sub> (1.2 mg, 0.005 mmol), (NH<sub>4</sub>)<sub>2</sub>S<sub>2</sub>O<sub>8</sub> (34.2 mg, 0.15 mmol), DCE (2.0 mL) and TfOH (2 μL, 0.02 mmol) successively. The tube was then sealed and the reaction mixture was stirred at room temperature for 12 h. After the reaction was completed, the reaction mixture was cooled to room temperature, washed with water and then extracted with ethyl acetate (10 mL×3). The combined organic phase was dried over anhydrous Na<sub>2</sub>SO<sub>4</sub>, and then filtered. After removing the solvent under vacuum, the crude product was purified by column chromatography on silica gel using petroleum ether/ethyl acetate (20:1) as the eluent to give the desired product **97** as a white solid (47.4 mg, 90%, 98% ee).



**h) Procedure for the synthesis of compound **98****<sup>ref.5</sup>

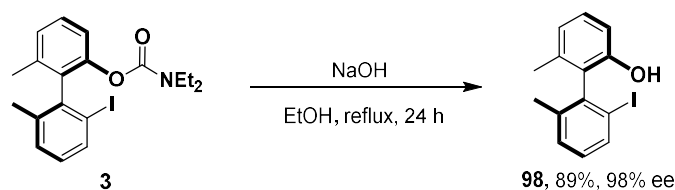

To a solution of **3** (0.1 mmol, 99% ee) in EtOH (2.0 mL) was added NaOH (1 mmol). The resulting mixture was heated under reflux in an oil bath for 24 h. After the reaction was completed, the reaction mixture was cooled to room temperature, quenched with 2 M HCl aqueous solution and then extracted with ethyl acetate (10 mL×3). The combined organic phase was washed with water, dried over anhydrous Na<sub>2</sub>SO<sub>4</sub>, and then filtered. After removing the solvent under vacuum, the crude product was purified by column chromatography on silica gel using petroleum ether/ethyl acetate (20:1) as the eluent to give the desired product **98** as a light yellow oil (28.8 mg, 89%, 98% ee).

**i) Procedure for the synthesis of compound **99****<sup>ref.1a</sup>

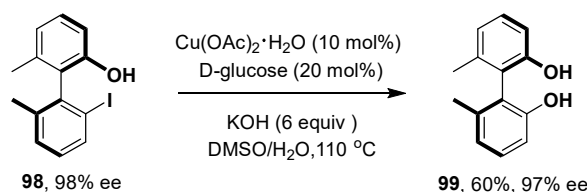

To a solution of **98** (0.1 mmol, 98% ee) in DMSO/H<sub>2</sub>O (2 mL, v/v = 1:1) was added the mixture of Cu(OAc)<sub>2</sub>·H<sub>2</sub>O (2.0 mg, 0.01 mmol), D-glucose (3.6 mg, 0.02 mmol), KOH (33.7 mg, 0.6 mmol) successively. The resulting mixture was stirred at 110 °C in an oil bath for 12 h. After the reaction was completed, the reaction mixture was cooled to room temperature, quenched with 2 M HCl aqueous solution, and then extracted with ethyl acetate (10 mL×3). The combined organic phase was washed with water, dried over anhydrous Na<sub>2</sub>SO<sub>4</sub>, and then filtered. After removing the solvent under vacuum, the crude product was purified by column chromatography on silica gel using petroleum ether/ethyl acetate (20:1) as the eluent to give the desired product **99** as a white solid (12.8 mg, 60%, 97% ee).

**j) Procedure for the synthesis of compound **100****<sup>ref.6</sup>

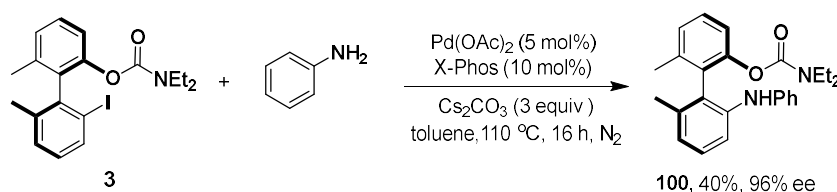

To a solution of **3** (0.1 mmol, 99% ee) in toluene (2.0 mL) was added the mixture of aniline (14  $\mu$ L, 0.15 mmol), Pd(OAc)<sub>2</sub> (1.13 mg, 0.005 mmol) and Cs<sub>2</sub>CO<sub>3</sub> (97.7 mg, 0.30 mmol) successively. The resulting mixture was stirred at 110 °C in an oil bath for 16 h under an atmosphere of N<sub>2</sub>. After the reaction was completed, the reaction mixture was cooled to room temperature, washed with water and then extracted with ethyl acetate (10 mL $\times$ 3). The combined organic phase was dried over anhydrous Na<sub>2</sub>SO<sub>4</sub>, and then filtered. After removing the solvent under vacuum, the crude product was purified by column chromatography on silica gel using petroleum ether/ethyl acetate (20:1) as the eluent to give the desired product **100** as a light yellow oil (15.5 mg, 40%, 96% ee).

**k) Procedure for the synthesis of compound 101** <sup>ref.5</sup>

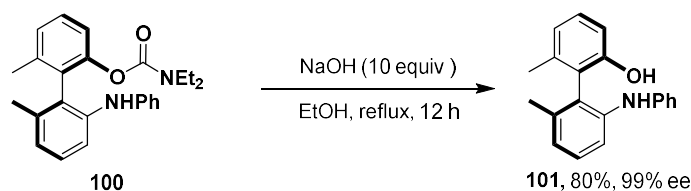

To a solution of **100** (0.1 mmol) in EtOH (2.0 mL) was added NaOH (10 equiv). The resulting mixture was heated under reflux in an oil bath for 12 h. After the reaction was completed, the reaction mixture was cooled to room temperature, quenched with 2 M HCl aqueous solution, and then extracted with ethyl acetate (10 mL $\times$ 3). The combined organic phase was washed with water, dried over anhydrous Na<sub>2</sub>SO<sub>4</sub>, and then filtered. After removing the solvent under vacuum, the crude product was purified by column chromatography on silica gel using petroleum ether/ethyl acetate (20:1) as the eluent to give the desired product **101** as a white solid (23.1 mg, 80%, 99% ee).

**l) Procedure for the synthesis of compound 102**

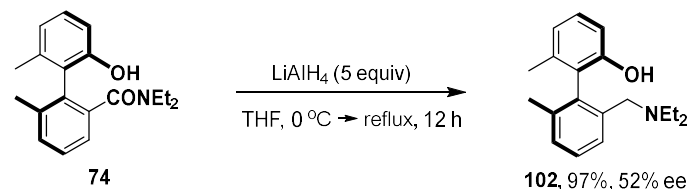

To a 25 mL oven-dried Schlenk tube containing a magnetic stir bar was added **74** (0.1 mmol, 99% ee) and THF (2 mL) successively. Then, a solution of LiAlH<sub>4</sub> in THF (2.5 M, 0.2 mL, 0.5 mmol) was added dropwise to the above mixture by a syringe under an atmosphere of N<sub>2</sub> at 0 °C. After the addition, the resulting mixture was allowed to warm to room temperature, and then heated under reflux for 12 h. After the reaction was completed, saturated NH<sub>4</sub>Cl aqueous solution was

added to quench the reaction and followed by extraction of an organic layer with EtOAc (3 × 10 mL). The combined organic phase was washed with water, dried over anhydrous Na<sub>2</sub>SO<sub>4</sub>, and then filtered. After removing the solvent under vacuum, the crude product was purified by column chromatography on silica gel using petroleum ether/ethyl acetate (10:1) as the eluent to give the desired product **102** as a colorless liquid (27.4 mg, 97%, 52% ee).

**m) Procedure for the synthesis of compound 103**

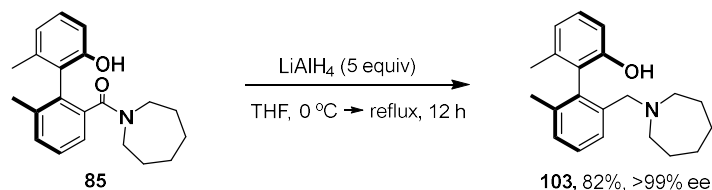

To a 25 mL oven-dried Schlenk tube containing a magnetic stir bar was added **85** (0.1 mmol, 99% ee) and THF (2 mL) successively. Then, a solution of LiAlH<sub>4</sub> in THF (2.5 M, 0.2 mL, 0.5 mmol) was added dropwise to the above mixture by a syringe under an atmosphere of N<sub>2</sub> at 0 °C. After the addition, the resulting mixture was allowed to warm to room temperature, and then heated under reflux for 12 h. After the reaction was completed, saturated NH<sub>4</sub>Cl aqueous solution was added to quench the reaction and followed by extraction of an organic layer with EtOAc (3 × 10 mL). The combined organic phase was washed with water, dried over anhydrous Na<sub>2</sub>SO<sub>4</sub>, and then filtered. After removing the solvent under vacuum, the crude product was purified by column chromatography on silica gel using petroleum ether/ethyl acetate (10:1) as the eluent to give the desired product **103** as a light yellow oil (25.3 mg, 82%, >99% ee).

**n) Procedure for the synthesis of compound 104**<sup>ref.8</sup>

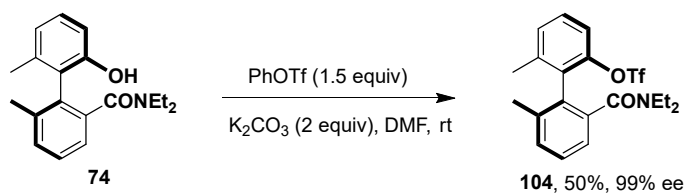

To a solution of **74** (0.1 mmol, 99% ee) in DMF (2 mL) was added the mixture of phenyl trifluoromethanesulfonate (0.15 mmol) and K<sub>2</sub>CO<sub>3</sub> (0.2 mmol). The reaction mixture was stirred at room temperature for 6 h. After the reaction was completed, the reaction was diluted with water, and extracted with EtOAc (3 × 10 mL). The organic phase was dried over anhydrous Na<sub>2</sub>SO<sub>4</sub> and then filtered. After removing the solvent under vacuum, the crude product was purified by column chromatography on silica gel using petroleum ether/ethyl acetate (20:1) as the eluent to give the desired product **104** as a white solid (21.4 mg, 50%, 99% ee).

## H. Analytical data

### (*R*)-2'-Iodo-6,6'-dimethyl-[1,1'-biphenyl]-2-yl diethylcarbamate (3)

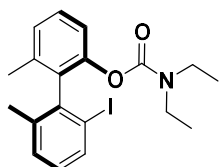

Eluent: 20:1 petroleum ether / ethyl acetate; light yellow oil, 41.8mg, 99% yield, 99% ee. HPLC conditions: Chiralpak OD-H, isopropanol/hexanes = 2:98, flow: 0.8 mL/min,  $\lambda = 254$  nm,  $t_r = 8.351$  min (major), 8.989 min (minor).  $[\alpha]_D^{25} = -48.75$  (c 0.28,  $\text{CH}_2\text{Cl}_2$ ).  $^1\text{H}$  NMR (400 MHz,  $\text{CDCl}_3$ ):  $\delta$  7.75 (d,  $J = 8.0$  Hz, 1H), 7.33 (t,  $J = 8.0$  Hz, 1H), 7.21 (d,  $J = 7.6$  Hz, 2H), 7.14 (d,  $J = 7.6$  Hz, 1H), 6.92 (t,  $J = 7.6$  Hz, 1H), 3.21 – 3.16 (m, 2H), 3.02 – 2.86 (m, 2H), 2.05 (s, 3H), 1.99 (s, 3H), 1.02 (t,  $J = 7.2$  Hz, 3H), 0.74 (t,  $J = 6.8$  Hz, 3H).  $^{13}\text{C}\{^1\text{H}\}$  NMR (100 MHz,  $\text{CDCl}_3$ ):  $\delta$  153.3, 148.3, 141.6, 138.8, 137.0, 136.3, 136.2, 129.7, 129.0, 128.4, 126.5, 120.3, 101.2, 41.9, 41.5, 21.2, 19.4, 13.5, 13.1. HRMS-ESI ( $m/z$ ): calcd for  $\text{C}_{19}\text{H}_{23}\text{INO}_2$  [ $\text{M} + \text{H}$ ] $^+$ : 424.0768, found 424.0763.

### (*R*)-2'-Iodo-6,6'-dimethyl-[1,1'-biphenyl]-2-yl dimethylcarbamate (4)

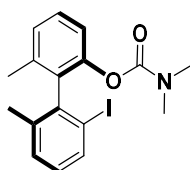

Eluent: 20:1 petroleum ether / ethyl acetate; light yellow oil, 21.7 mg, 55% yield, 95% ee. HPLC conditions: Chiralpak INC, isopropanol/hexanes = 3:97, flow: 1.0 mL/min,  $\lambda = 254$  nm,  $t_r = 11.606$  min (major), 11.036 min (minor).  $[\alpha]_D^{25} = -56.71$  (c 0.16,  $\text{CH}_2\text{Cl}_2$ ).  $^1\text{H}$  NMR (400 MHz,  $\text{CDCl}_3$ ):  $\delta$  7.76 (d,  $J = 7.6$  Hz, 1H), 7.34 (t,  $J = 7.6$  Hz, 1H), 7.22 (t,  $J = 7.2$  Hz, 2H), 7.15 (d,  $J = 7.2$  Hz, 1H), 6.94 (t,  $J = 7.6$  Hz, 1H), 2.81 (s, 3H), 2.54 (s, 3H), 2.04 (s, 3H), 2.00 (s, 3H).  $^{13}\text{C}\{^1\text{H}\}$  NMR (100 MHz,  $\text{CDCl}_3$ ):  $\delta$  154.0, 148.3, 141.4, 138.7, 137.0, 136.2(2), 136.1(9), 129.6, 129.0, 128.4, 126.7, 120.3, 101.1, 36.4, 35.8, 21.2, 19.3. HRMS-ESI ( $m/z$ ): calcd for  $\text{C}_{17}\text{H}_{18}\text{INO}_2$  [ $\text{M} + \text{H}$ ] $^+$ : 396.0455, found 396.0456.

### (*R*)-2'-Iodo-6,6'-dimethyl-[1,1'-biphenyl]-2-yl dipropylcarbamate (5)

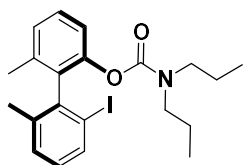

Eluent: 20:1 petroleum ether / ethyl acetate; light yellow oil, 42.8 mg, 95% yield, 98% ee. HPLC conditions: Chiralpak AD-H, isopropanol/hexane = 1:99, flow: 0.6 mL/min,  $\lambda = 254$  nm,  $t_r = 12.278$  min (major), 14.186 min (minor).  $[\alpha]_D^{25} = -59.34$  (c 0.18,  $\text{CH}_2\text{Cl}_2$ ).  $^1\text{H}$  NMR (400 MHz,  $\text{CDCl}_3$ ):  $\delta$  7.75 (d,  $J = 8.0$  Hz, 1H), 7.33 (t,  $J = 8.0$  Hz, 1H), 7.20 (t,  $J = 8.4$  Hz, 2H), 7.13 (d,  $J = 7.6$  Hz, 1H), 6.93 (t,  $J = 7.6$  Hz, 1H), 3.11 (t,  $J = 7.2$  Hz, 2H), 2.91 – 2.84 (m, 1H), 2.78 – 2.71 (m, 1H), 2.03 (s, 3H), 1.98 (s, 3H), 1.49 – 1.44 (m, 2H), 1.24 – 1.16 (m, 1H),

1.07 – 0.98 (m, 1H), 0.80 (t,  $J = 7.2$  Hz, 3H), 0.67 (t,  $J = 7.2$  Hz, 3H).  $^{13}\text{C}\{^1\text{H}\}$  NMR (100 MHz,  $\text{CDCl}_3$ ):  $\delta$  153.8, 148.3, 141.6, 138.7, 136.9, 136.3, 136.2, 129.7, 128.9, 128.3, 126.5, 120.5, 101.2, 49.3, 49.1, 21.5, 21.2, 21.1, 19.4, 11.2, 11.0. HRMS-ESI ( $m/z$ ): calcd for  $\text{C}_{21}\text{H}_{27}\text{INO}_2$  [ $\text{M} + \text{H}$ ] $^+$ : 452.1081, found 452.1080.

**(*R*)-2'-Iodo-6,6'-dimethyl-[1,1'-biphenyl]-2-yl diisopropylcarbamate (6)**

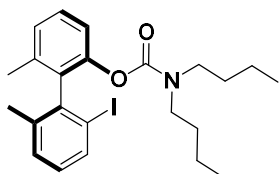

Eluent: 10:1 petroleum ether / ethyl acetate; light yellow oil, 22.1 mg, 49% yield, 98% ee. HPLC conditions: Chiralpak OD-H, isopropanol/hexanes = 1:99, flow: 0.6 mL/min,  $\lambda = 254$  nm,  $t_r = 29.180$  min (major), 27.905 min (minor).  $[\alpha]_D^{25} = -57.63$  (c 0.20,  $\text{CH}_2\text{Cl}_2$ ).  $^1\text{H}$  NMR (400 MHz,  $\text{CDCl}_3$ ):  $\delta$  7.74 (d,  $J = 8.0$  Hz, 1H), 7.32 (t,  $J = 8.0$  Hz, 1H), 7.20 (d,  $J = 8.4$  Hz, 1H), 7.15 – 7.12 (m, 2H), 6.91 (t,  $J = 7.6$  Hz, 1H), 3.71 (s, 2H), 2.06 (s, 3H), 1.98 (s, 3H), 1.18 – 1.07 (m, 6H), 0.86 (s, 6H).  $^{13}\text{C}\{^1\text{H}\}$  NMR (100 MHz,  $\text{CDCl}_3$ ):  $\delta$  152.5, 148.4, 141.6, 139.0, 137.0, 136.5, 136.3, 129.7, 129.0, 128.3, 126.5, 120.8, 101.5, 46.4, 45.9, 21.2, 20.7, 20.5, 20.4, 20.3, 19.4. HRMS-ESI ( $m/z$ ): calcd for  $\text{C}_{21}\text{H}_{27}\text{INO}_2$  [ $\text{M} + \text{H}$ ] $^+$ : 452.1081, found 452.1084.

**(*R*)-2'-Iodo-6,6'-dimethyl-[1,1'-biphenyl]-2-yl diallylcarbamate (7)**

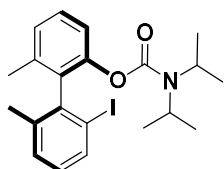

Eluent: 20:1 petroleum ether / ethyl acetate; light yellow oil, 38.0 mg, 85% yield, 98% ee. HPLC conditions: Chiralpak OD-H and AD-H, isopropanol/hexanes = 1:99, flow: 0.6 mL/min,  $\lambda = 254$  nm,  $t_r = 32.429$  min (major), 35.268 min (minor).  $[\alpha]_D^{25} = -56.32$  (c 0.26,  $\text{CH}_2\text{Cl}_2$ ).  $^1\text{H}$  NMR (400 MHz,  $\text{CDCl}_3$ ):  $\delta$  7.76 (d,  $J = 8.0$  Hz, 1H), 7.34 (t,  $J = 8.0$  Hz, 1H), 7.24 – 7.19 (m, 2H), 7.18 (d,  $J = 8.8$  Hz, 1H), 6.95 (t,  $J = 8.0$  Hz, 1H), 5.69 – 5.60 (m, 1H), 5.34 – 5.26 (m, 1H), 5.09 (d,  $J = 10.4$  Hz, 1H), 5.01 – 4.90 (m, 3H), 3.78 (d,  $J = 4.8$  Hz, 2H), 3.49 (d,  $J = 5.2$  Hz, 2H), 2.04 (s, 3H), 2.00 (s, 3H).  $^{13}\text{C}\{^1\text{H}\}$  NMR (100 MHz,  $\text{CDCl}_3$ ):  $\delta$  153.5, 148.2, 141.4, 138.8, 137.1, 136.4, 136.3, 132.9, 129.7, 129.0, 128.4, 126.8, 120.4, 116.9, 116.6, 101.1, 48.8, 48.7, 21.2, 19.3. HRMS-ESI ( $m/z$ ): calcd for  $\text{C}_{21}\text{H}_{23}\text{INO}_2$  [ $\text{M} + \text{H}$ ] $^+$ : 448.0768, found 448.0770.

**(*R*)-2'-Iodo-6,6'-dimethyl-[1,1'-biphenyl]-2-yl dibutylcarbamate (8)**

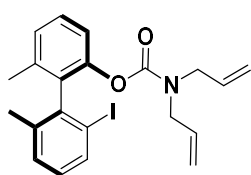

Eluent: 20:1 petroleum ether / ethyl acetate; light yellow oil, 41.2 mg, 86% yield, 94% ee. HPLC conditions: Chiralpak RR, isopropanol/hexanes = 1:99, flow: 0.6 mL/min,  $\lambda = 254$  nm,  $t_r = 12.214$

min (major), 13.438 min (minor).  $[\alpha]^{25}_D = -54.79$  (c 0.19,  $\text{CH}_2\text{Cl}_2$ ).  $^1\text{H NMR}$  (400 MHz,  $\text{CDCl}_3$ ):  $\delta$  7.78 (d,  $J = 7.6$  Hz, 1H), 7.35 (t,  $J = 7.6$  Hz, 1H), 7.24 (d,  $J = 7.6$  Hz, 1H), 7.20 (d,  $J = 7.6$  Hz, 1H), 7.16 (d,  $J = 7.6$  Hz, 1H), 6.96 (t,  $J = 7.6$  Hz, 1H), 3.17 (td,  $J = 7.2, 3.2$  Hz, 2H), 2.97 – 2.90 (m, 1H), 2.85 – 2.78 (m, 1H), 2.06 (s, 3H), 2.00 (s, 3H), 1.48 – 1.40 (m, 2H), 1.28 – 1.19 (m, 3H), 1.16 – 1.09 (m, 3H), 0.91 (t,  $J = 7.2$  Hz, 3H), 0.85 (t,  $J = 6.8$  Hz, 3H).  $^{13}\text{C}\{^1\text{H}\}$  NMR (100 MHz,  $\text{CDCl}_3$ ):  $\delta$  153.8, 148.3, 141.6, 138.7, 136.9, 136.3(0), 136.2(6), 129.7, 128.9, 128.4, 126.5, 120.5, 101.2, 47.2, 47.1, 30.4, 29.9, 21.2, 20.0, 19.8, 19.4, 13.8. HRMS-ESI ( $m/z$ ): calcd for  $\text{C}_{23}\text{H}_{31}\text{INO}_2$   $[\text{M} + \text{H}]^+$ : 480.1394, found 480.1394.

**(R)-2'-Iodo-6,6'-dimethyl-[1,1'-biphenyl]-2-yl dibenzylcarbamate (9)**

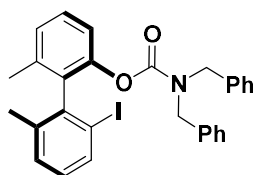

Eluent: 10:1 petroleum ether / ethyl acetate; light yellow oil, 41.8mg, 76% yield, 99% ee. HPLC conditions: Chiralpak AD-H, isopropanol/hexanes = 1:99, flow: 0.8 mL/min,  $\lambda = 254$  nm,  $t_r = 52.213$  min (major), 49.923 min (minor).  $[\alpha]^{25}_D = -40.06$  (c 0.31,  $\text{CH}_2\text{Cl}_2$ ).  $^1\text{H NMR}$  (400 MHz,  $\text{CDCl}_3$ ):  $\delta$  7.74 (d,  $J = 8.0$  Hz, 1H), 7.38 (t,  $J = 8.0$  Hz, 1H), 7.33 – 7.27 (m, 4H), 7.25 – 7.22 (m, 4H), 7.19 (d,  $J = 7.6$  Hz, 1H), 7.06 (d,  $J = 6.0$  Hz, 2H), 6.97 – 6.93 (m, 3H), 4.38 (q,  $J = 14.8$  Hz, 2H), 4.07 (q,  $J = 15.6$  Hz, 2H), 2.07 (s, 3H), 2.02 (s, 3H).  $^{13}\text{C}\{^1\text{H}\}$  NMR (100 MHz,  $\text{CDCl}_3$ ):  $\delta$  154.4, 148.2, 141.3, 138.9, 137.3, 136.9, 136.5, 136.4, 129.8, 129.1, 128.6, 128.5(2), 128.4(8), 127.9, 127.8, 127.3, 127.3, 127.1, 120.5, 100.0, 49.1, 49.0, 21.3, 19.4. HRMS-ESI ( $m/z$ ): calcd for  $\text{C}_{29}\text{H}_{27}\text{INO}_2$   $[\text{M} + \text{H}]^+$ : 548.8081, found 548.8082.

**(R)-2'-Iodo-6,6'-dimethyl-[1,1'-biphenyl]-2-yl methyl(propyl)carbamate (10)**

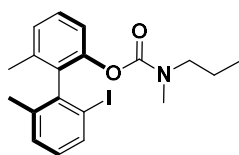

Eluent: 20:1 petroleum ether / ethyl acetate; light yellow oil, 33.8mg, 80% yield, 98% ee. HPLC conditions: Chiralpak OJ-H, isopropanol/hexanes = 1:99, flow: 0.5 mL/min,  $\lambda = 254$  nm,  $t_r = 13.810$  min (major), 16.844 min (minor).  $[\alpha]^{25}_D = -58.19$  (c 0.18,  $\text{CH}_2\text{Cl}_2$ ).  $^1\text{H NMR}$  (400 MHz,  $\text{CDCl}_3$ ):  $\delta$  7.76 (d,  $J = 8.4$  Hz, 1H), 7.33 (t,  $J = 7.6$  Hz, 1H), 7.21 (t,  $J = 7.2$  Hz, 2H), 7.16 – 7.13 (m, 1H), 6.93 (t,  $J = 8.0$  Hz, 1H), 3.22 – 2.50 (m, 5H), 2.04 (s, 3H), 2.00 – 1.98 (m, 3H), 1.44 – 0.97 (m, 2H), 0.77 (t,  $J = 7.2$  Hz, 1H), 0.64 (t,  $J = 7.2$  Hz, 2H).  $^{13}\text{C}\{^1\text{H}\}$  NMR (100 MHz,  $\text{CDCl}_3$ ):  $\delta$  153.8, 148.3, 148.2, 141.6, 141.4, 138.8, 138.6, 137.0, 136.3, 136.2, 129.6, 128.9, 128.4(0), 128.3(7), 126.7, 126.5, 120.6, 120.1, 101.1(4), 101.1(1), 50.8, 50.5, 34.7, 33.7, 21.3, 21.2, 20.7, 20.3, 19.3, 10.9, 10.8.

HRMS-ESI ( $m/z$ ): calcd for  $C_{19}H_{23}INO_2$  [ $M + H$ ] $^+$ : 424.0768, found 424.0767.

**(R)-2'-Iodo-6,6'-dimethyl-[1,1'-biphenyl]-2-yl ethyl(propyl)carbamate (11)**

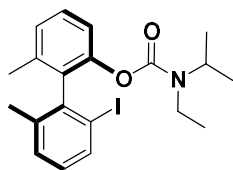

Eluent: 20:1 petroleum ether / ethyl acetate; light yellow oil, 32.3 mg, 74% yield, 98% ee. HPLC conditions: Chiralpak OD-H and AD-H, isopropanol/hexanes = 1:99, flow: 0.8 mL/min,  $\lambda = 254$  nm,  $t_r = 19.120$  min (major), 21.559 min (minor).  $[\alpha]_D^{25} = -57.02$  (c 0.24,  $CH_2Cl_2$ ).  $^1H$

NMR (400 MHz,  $CDCl_3$ ):  $\delta$  7.75 (d,  $J = 8.0$  Hz, 1H), 7.33 (t,  $J = 8.0$  Hz, 1H), 7.22 – 7.19 (m, 2H), 7.14 (d,  $J = 7.6$  Hz, 1H), 6.92 (t,  $J = 7.6$  Hz, 1H), 3.22 – 3.08 (m, 2H), 3.02 – 2.71 (m, 2H), 2.04 (s, 3H), 1.98 (s, 3H), 1.48 – 1.43 (m, 1H), 1.24 – 1.16 (m, 1H), 1.02 (t,  $J = 6.8$  Hz, 2H), 0.82 – 0.65 (m, 4H).  $^{13}C\{^1H\}$  NMR (100 MHz,  $CDCl_3$ ):  $\delta$  153.4, 148.3, 141.6, 138.7, 136.9, 136.3, 136.2, 129.7, 128.9, 128.4, 126.5, 120.4, 101.2, 48.7, 48.6, 42.4, 42.0, 21.6, 21.2, 19.4, 13.3, 13.0, 11.1.

HRMS-ESI ( $m/z$ ): calcd for  $C_{20}H_{25}INO_2$  [ $M + H$ ] $^+$ : 438.0924, found 438.0924.

**(R)-2'-Iodo-6,6'-dimethyl-[1,1'-biphenyl]-2-yl benzyl(isopropyl)carbamate (12)**

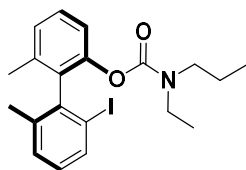

Eluent: 20:1 petroleum ether / ethyl acetate; light yellow oil, 41.9 mg, 84% yield, 99% ee. HPLC conditions: Chiralpak AD-H, isopropanol/hexanes = 4:96, flow: 0.8 mL/min,  $\lambda = 254$  nm,  $t_r = 10.353$  min (major), 10.915 min (minor).  $[\alpha]_D^{25} = -61.89$  (c 0.31,  $CH_2Cl_2$ ).  $^1H$

NMR (400 MHz,  $CDCl_3$ ):  $\delta$  7.76 (t,  $J = 8.4$  Hz, 1H), 7.38 – 7.27 (m, 2H), 7.25 – 7.11 (m, 6H), 7.02 – 6.93 (m, 2H), 4.46 – 4.29 (m, 1H), 4.12 – 3.90 (m, 2H), 2.09 – 1.99 (m, 6H), 1.07 – 1.00 (m, 3H), 0.90 – 0.74 (m, 3H).  $^{13}C\{^1H\}$  NMR (100 MHz,  $CDCl_3$ ):  $\delta$  154.5, 148.3, 141.4, 139.2, 138.9, 137.1, 136.4, 129.7, 129.0, 128.5, 128.2, 127.1, 126.8, 126.7, 126.6, 120.6, 120.5, 101.3, 48.9, 47.0, 21.3, 20.8, 20.0, 19.4. HRMS-ESI ( $m/z$ ): calcd for  $C_{25}H_{27}INO_2$  [ $M + H$ ] $^+$ : 500.1081, found 500.1080.

**(R)-2'-Iodo-6,6'-dimethyl-[1,1'-biphenyl]-2-yl ethyl(isopropyl)carbamate (13)**

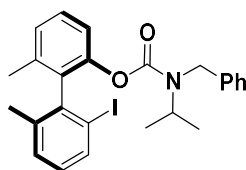

Eluent: 20:1 petroleum ether / ethyl acetate; light yellow oil, 30.6 mg, 70% yield, 92% ee. HPLC conditions: Chiralpak OD-H, isopropanol/hexanes = 2:98, flow: 0.5 mL/min,  $\lambda = 254$  nm,  $t_r = 11.247$  min (major), 12.092 min (minor).  $[\alpha]_D^{25} = -53.93$  (c 0.28,  $CH_2Cl_2$ ).  $^1H$

NMR (400 MHz,  $CDCl_3$ ):  $\delta$  7.75 (d,  $J = 8.0$  Hz, 1H), 7.33 (t,  $J = 7.6$  Hz, 1H), 7.20 (d,  $J = 7.6$  Hz,

2H), 7.14 (d,  $J = 7.6$  Hz, 1H), 6.92 (t,  $J = 7.6$  Hz, 1H), 4.17 – 3.84 (m, 1H), 3.20 – 3.04 (m, 1H), 2.89 – 2.70 (m, 1H), 2.05 (s, 3H), 1.99 (s, 3H), 1.02 – 0.93 (m, 6H), 0.79 – 0.76 (m, 3H).  $^{13}\text{C}\{^1\text{H}\}$  NMR (100 MHz,  $\text{CDCl}_3$ ):  $\delta$  153.4, 148.4, 141.6, 138.8, 136.9, 136.3, 129.6, 128.9, 128.4, 126.5, 120.5, 101.3, 99.9, 47.8, 37.3, 21.2, 20.7, 20.3, 19.4, 15.3. HRMS-ESI ( $m/z$ ): calcd for  $\text{C}_{20}\text{H}_{25}\text{INO}_2$  [ $\text{M} + \text{H}$ ] $^+$ : 438.0924, found 438.0923.

**(R)-2'-Iodo-6,6'-dimethyl-[1,1'-biphenyl]-2-yl benzyl(methyl)carbamate (14)**

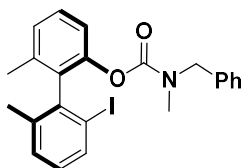

Eluent: 20:1 petroleum ether / ethyl acetate; light yellow oil, 36.1 mg, 78% yield, >99% ee. HPLC conditions: Chiralpak INC, isopropanol/hexanes = 5:95, flow: 0.6 mL/min,  $\lambda = 254$  nm,  $t_r = 15.920$  min (major), 16.605 min (minor).  $[\alpha]^{25}_{\text{D}} = -53.14$  (c 0.21,  $\text{CH}_2\text{Cl}_2$ ).  $^1\text{H}$  NMR (400 MHz,  $\text{CDCl}_3$ ):  $\delta$  7.76 – 7.71 (m, 1H), 7.38 – 7.34 (m, 1H), 7.34 – 7.28 (m, 1H), 7.23 – 7.16 (m, 5H), 7.03 (d,  $J = 6.4$  Hz, 1H), 6.95 – 6.86 (m, 2H), 4.52 – 4.06 (m, 2H), 2.77 (s, 1.4 H), 2.49 (s, 1.6 H), 2.06 (s, 3H), 2.02 – 1.99 (m, 3H).  $^{13}\text{C}\{^1\text{H}\}$  NMR (100 MHz,  $\text{CDCl}_3$ ):  $\delta$  154.4, 153.8, 148.2, 141.3(3), 141.2(6), 138.8, 138.6, 137.1(3), 137.0(8), 136.9, 136.8, 136.5, 136.4, 136.3, 136.1, 129.7, 129.1, 129.0, 128.5, 128.4(4), 128.3(8), 127.5, 127.2, 127.0, 126.7, 101.1, 52.4, 33.9, 33.4, 21.3, 21.2, 19.3(5), 19.3(3). HRMS-ESI ( $m/z$ ): calcd for  $\text{C}_{23}\text{H}_{23}\text{INO}_2$  [ $\text{M} + \text{H}$ ] $^+$ : 472.0768, found 472.0771.

**(R)-2'-Iodo-6,6'-dimethyl-[1,1'-biphenyl]-2-yl cyclohexyl(methyl)carbamate (15)**

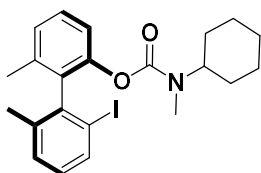

Eluent: 10:1 petroleum ether / ethyl acetate; light yellow oil, 31.9 mg, 69% yield, 95% ee. HPLC conditions: Chiralpak INC, isopropanol/hexanes = 7:93, flow: 1 mL/min,  $\lambda = 254$  nm,  $t_r = 5.925$  min (major), 6.443 min (minor).  $[\alpha]^{25}_{\text{D}} = -44.40$  (c 0.25,  $\text{CH}_2\text{Cl}_2$ ).  $^1\text{H}$  NMR (400 MHz,  $\text{CDCl}_3$ ):  $\delta$  7.75 (d,  $J = 7.6$  Hz, 1H), 7.34 (t,  $J = 8.0$  Hz, 1H), 7.22 – 7.19 (m, 2H), 7.15 (d,  $J = 7.6$  Hz, 1H), 6.92 (t,  $J = 8.0$  Hz, 1H), 3.83 – 3.45 (m, 1H), 2.70 (s, 2 H), 2.34 (s, 1 H), 2.03 (s, 3H), 1.98 (s, 3H), 1.73 – 1.56 (m, 4H), 1.49 – 1.17 (m, 4H), 1.13 – 0.95 (m, 2H).  $^{13}\text{C}\{^1\text{H}\}$  NMR (100 MHz,  $\text{CDCl}_3$ ):  $\delta$  153.6, 148.2, 141.6, 138.7, 136.9, 136.3, 129.7, 128.9, 128.4, 126.6, 120.7, 120.5, 101.1, 55.5, 55.0, 30.3, 30.0, 28.5, 25.7, 25.4, 21.3, 19.3. HRMS-ESI ( $m/z$ ): calcd for  $\text{C}_{22}\text{H}_{27}\text{INO}_2$  [ $\text{M} + \text{H}$ ] $^+$ : 464.1081, found 464.1080.



**(R)-2'-Iodo-6,6'-dimethyl-[1,1'-biphenyl]-2-yl methyl(naphthalen-1-ylmethyl)carbamate (16)**

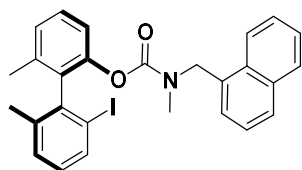

Eluent: 20:1 petroleum ether / ethyl acetate; light yellow oil, 44.3 mg, 85% yield, 96% ee. HPLC conditions: Chiralpak AD-H, isopropanol/hexanes = 3:97, flow: 1.0 mL/min,  $\lambda = 254$  nm,  $t_r = 16.709$  min (major), 17.838 min (minor).  $[\alpha]_D^{25} = -49.36$  (c 0.31,

$\text{CH}_2\text{Cl}_2$ ).  $^1\text{H NMR}$  (400 MHz,  $\text{CDCl}_3$ ):  $\delta$  8.01 (d,  $J = 8.0$  Hz, 1H), 7.88 – 7.86 (m, 1H), 7.80 – 7.72 (m, 2H), 7.53 – 7.28 (m, 5H), 7.21 – 7.00 (m, 3H), 6.94 – 6.65 (m, 1H), 4.94 – 4.58 (m, 2H), 2.84 (s, 1.2 H), 2.51 (s, 1.8 H), 2.07 – 1.96 (m, 6H).  $^{13}\text{C}\{^1\text{H}\}$  NMR (100 MHz,  $\text{CDCl}_3$ ):  $\delta$  154.2, 154.0, 148.3, 141.4, 141.2, 138.8, 138.4, 137.2, 136.5, 136.3, 133.8, 133.7, 132.2, 132.1, 131.6, 131.1, 129.7, 129.6, 129.0, 128.9, 128.7, 128.6, 128.5, 128.2, 127.8, 127.0, 126.7, 126.5, 126.2, 125.8, 125.7, 125.5, 125.2, 124.1, 123.5, 122.8, 120.6, 119.8, 101.2, 100.9, 50.4, 50.1, 34.5, 33.4, 21.3, 19.4. HRMS-ESI ( $m/z$ ): calcd for  $\text{C}_{27}\text{H}_{25}\text{INO}_2$  [ $\text{M} + \text{H}$ ] $^+$ : 522.0924, found 522.0930.

**(R)-2'-Iodo-6,6'-dimethyl-[1,1'-biphenyl]-2-yl methyl(phenethyl)carbamate (17)**

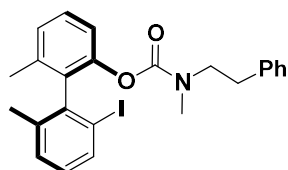

Eluent: 20:1 petroleum ether / ethyl acetate; light yellow oil, 30.1 mg, 62% yield, 95% ee. HPLC conditions: Chiralpak INC, isopropanol/hexanes = 3:97, flow: 1.0 mL/min,  $\lambda = 254$  nm,  $t_r = 12.538$  min (major), 11.416 min (minor).  $[\alpha]_D^{25} = -44.81$  (c 0.24,

$\text{CH}_2\text{Cl}_2$ ).  $^1\text{H NMR}$  (400 MHz,  $\text{CDCl}_3$ ):  $\delta$  7.79 – 7.71 (m, 1H), 7.34 (t,  $J = 8.0$  Hz, 1H), 7.29 – 7.27 (m, 1H), 7.25 – 7.11 (m, 6H), 7.06 (d,  $J = 6.8$  Hz, 1H), 6.98 – 6.85 (m, 1H), 3.45 – 3.02 (m, 2H), 2.73 – 2.27 (m, 5H), 2.08 – 2.05 (m, 3H), 2.00 (s, 3H).  $^{13}\text{C}\{^1\text{H}\}$  NMR (100 MHz,  $\text{CDCl}_3$ ):  $\delta$  153.8, 153.7, 148.2, 148.1, 141.5, 141.4, 138.9, 138.8, 138.7, 137.1, 137.0, 136.4(1), 136.3(5), 136.3, 136.2, 129.8, 129.7, 129.1, 129.0, 128.9, 128.8, 128.4(2), 128.3(5), 126.8, 126.7, 126.2, 120.5, 120.4, 101.2(2), 101.1(6), 51.2, 51.1, 35.5, 34.6, 34.2, 33.8, 21.3, 21.2, 19.4. HRMS-ESI ( $m/z$ ): calcd for  $\text{C}_{24}\text{H}_{25}\text{INO}_2$  [ $\text{M} + \text{H}$ ] $^+$ : 486.0924, found 486.0923.

**(R)-2'-Iodo-6,6'-dimethyl-[1,1'-biphenyl]-2-yl pyrrolidine-1-carboxylate (18)**

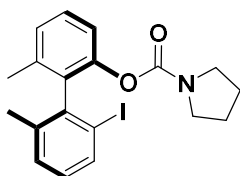

Eluent: 20:1 petroleum ether / ethyl acetate; white solid, 31.2 mg, 74% yield, 96% ee. mp: 70-71 °C. HPLC conditions: Chiralpak INC, isopropanol/hexanes = 7:93, flow: 1.0 mL/min,  $\lambda = 254$  nm,  $t_r = 10.574$  min (major), 11.335 min (minor).  $[\alpha]_D^{25} = -42.58$  (c 0.26,  $\text{CH}_2\text{Cl}_2$ ).  $^1\text{H}$

NMR (400 MHz, CDCl<sub>3</sub>):  $\delta$  7.75 (d,  $J$  = 7.6 Hz, 1H), 7.33 (t,  $J$  = 8.0 Hz, 1H), 7.25 – 7.21 (m, 2H), 7.14 (d,  $J$  = 7.6 Hz, 1H), 6.93 (t,  $J$  = 7.6 Hz, 1H), 3.33 – 3.20 (m, 2H), 3.04 – 2.99 (m, 1H), 2.82 – 2.76 (m, 1H), 2.05 (s, 3H), 2.00 (s, 3H), 1.76 – 1.61 (m, 4H). <sup>13</sup>C{<sup>1</sup>H} NMR (100 MHz, CDCl<sub>3</sub>):  $\delta$  152.3, 148.3, 141.6, 138.8, 137.0, 136.2(2), 136.1(8), 129.6, 128.9, 128.5, 126.6, 120.3, 101.2, 46.0, 45.7, 25.5, 24.8, 21.3, 19.4. HRMS-ESI ( $m/z$ ): calcd for C<sub>19</sub>H<sub>21</sub>INO<sub>2</sub> [M + H]<sup>+</sup>: 422.0611, found 422.0609.

**(R)-2'-Iodo-6,6'-dimethyl-[1,1'-biphenyl]-2-yl piperidine-1-carboxylate (19)**

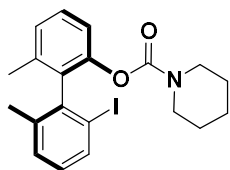

Eluent: 20:1 petroleum ether / ethyl acetate; white solid, 21.8 mg, 50% yield, >99% ee. mp: 90-91 °C. HPLC conditions: Chiralpak OD-H, isopropanol/hexanes = 0.5:99.5, flow: 0.5 mL/min,  $\lambda$  = 254 nm,  $t_r$  = 37.774 min (major), 33.173 min (minor). [ $\alpha$ ]<sub>D</sub><sup>25</sup> = -33.33 (c 0.13, CH<sub>2</sub>Cl<sub>2</sub>). <sup>1</sup>H

NMR (400 MHz, CDCl<sub>3</sub>):  $\delta$  7.76 (d,  $J$  = 7.6 Hz, 1H), 7.33 (t,  $J$  = 8.0 Hz, 1H), 7.22 (d,  $J$  = 7.6 Hz, 1H), 7.19-7.14 (m, 2H), 6.93 (t,  $J$  = 7.6 Hz, 1H), 3.41 – 3.35 (m, 1H), 3.23 – 3.11 (m, 2H), 3.05 – 2.99 (m, 1H), 2.05 (s, 3H), 1.99 (s, 3H), 1.48 – 1.42 (m, 3H), 1.33 – 1.21 (m, 2H), 1.02 – 0.89 (m, 1H). <sup>13</sup>C{<sup>1</sup>H} NMR (100 MHz, CDCl<sub>3</sub>):  $\delta$  152.8, 148.3, 141.5, 138.9, 137.0, 136.4, 136.3, 129.6, 128.9, 128.5, 126.7, 120.6, 101.2, 45.3, 45.0, 25.5, 24.2, 21.2, 19.3. HRMS-ESI ( $m/z$ ): calcd for C<sub>20</sub>H<sub>23</sub>INO<sub>2</sub> [M + H]<sup>+</sup>: 436.0768, found 436.0768.

**(R)-2'-Iodo-6,6'-dimethyl-[1,1'-biphenyl]-2-yl azepane-1-carboxylate (20)**

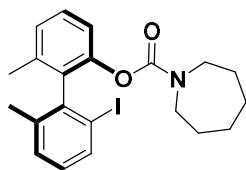

Eluent: 20:1 petroleum ether / ethyl acetate; light yellow oil, 37.7 mg, 84% yield, 98% ee. HPLC conditions: Chiralpak AD-H, isopropanol/hexanes = 1:99, flow: 0.6 mL/min,  $\lambda$  = 254 nm,  $t_r$  = 19.936 min (major), 23.159 min (minor). [ $\alpha$ ]<sub>D</sub><sup>25</sup> = -39.39 (c 0.30, CH<sub>2</sub>Cl<sub>2</sub>). <sup>1</sup>H

NMR (400 MHz, CDCl<sub>3</sub>):  $\delta$  7.75 (d,  $J$  = 7.6 Hz, 1H), 7.33 (t,  $J$  = 7.6 Hz, 1H), 7.22 – 7.18 (m, 2H), 7.15 (d,  $J$  = 7.2 Hz, 1H), 6.92 (t,  $J$  = 7.6 Hz, 1H), 3.49 – 3.43 (m, 1H), 3.26 – 3.18 (m, 2H), 3.02 – 2.95 (m, 1H), 2.05 (s, 3H), 1.98 (s, 3H), 1.61 – 1.58 (m, 2H), 1.46 – 1.38 (m, 1H), 1.33 – 1.25 (m, 3H), 1.21 – 1.06 (m, 2H). <sup>13</sup>C{<sup>1</sup>H} NMR (100 MHz, CDCl<sub>3</sub>):  $\delta$  153.7, 148.3, 141.6, 138.8, 137.0, 136.3(3), 136.3(1), 129.7, 129.0, 128.4, 126.6, 120.5, 101.2, 47.2, 46.9, 28.0, 27.9, 27.0, 26.5, 21.3, 19.4. HRMS-ESI ( $m/z$ ): calcd for C<sub>21</sub>H<sub>25</sub>INO<sub>2</sub> [M + H]<sup>+</sup>: 450.0924, found 450.0924.

**(R)-2'-Iodo-6,6'-dimethyl-[1,1'-biphenyl]-2-yl 6-azaspiro[2.5]octane-6-carboxylate (21)**

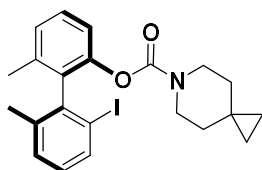

Eluent: 5:1 petroleum ether / ethyl acetate; white solid, 17.5 mg, 38% yield, 98% ee. mp: 90-92 °C. HPLC conditions: Chiralpak OD-H, isopropanol/hexanes = 5:95, flow: 1.0 mL/min,  $\lambda = 254$  nm,  $t_r = 7.302$  min (major), 8.162 min (minor).  $[\alpha]_D^{25} = -46.75$  (c 0.15,  $\text{CH}_2\text{Cl}_2$ ).  $^1\text{H}$  NMR (400 MHz,  $\text{CDCl}_3$ ):  $\delta$  7.76 (d,  $J = 7.6$  Hz, 1H), 7.34 (t,  $J = 7.6$  Hz, 1H), 7.24 – 7.19 (m, 2H), 7.15 (d,  $J = 7.6$  Hz, 1H), 6.94 (t,  $J = 8.0$  Hz, 1H), 3.50 – 3.43 (m, 1H), 3.32 – 3.20 (m, 2H), 3.14 – 3.07 (m, 1H), 2.06 (s, 3H), 2.00 (s, 3H), 1.26 – 1.16 (m, 2H), 0.96 – 0.82 (m, 2H), 0.25 (s, 4H).  $^{13}\text{C}\{^1\text{H}\}$  NMR (100 MHz,  $\text{CDCl}_3$ ):  $\delta$  152.9, 148.3, 141.5, 138.9, 137.0, 136.4, 136.3, 129.7, 129.0, 128.5, 126.8, 120.6, 101.2, 44.3, 44.1, 34.7, 21.2, 19.3, 17.4, 11.3. HRMS-ESI ( $m/z$ ): calcd for  $\text{C}_{22}\text{H}_{25}\text{INO}_2$   $[\text{M}+\text{H}]^+$ : 462.0924, found 462.0921.

**(R)-2'-Iodo-6,6'-dimethyl-[1,1'-biphenyl]-2-yl 3,4-dihydroisoquinoline-2(1H)-carboxylate (22)**

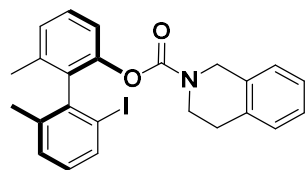

Eluent: 20:1 petroleum ether / ethyl acetate; light yellow oil, 35.7 mg, 74% yield, 94% ee. HPLC conditions: Chiralpak AD-H, isopropanol/hexanes = 10:90, flow: 0.8 mL/min,  $\lambda = 254$  nm,  $t_r = 8.721$  min (major), 10.127 min (minor).  $[\alpha]_D^{25} = -16.77$  (c 0.32,  $\text{CH}_2\text{Cl}_2$ ).  $^1\text{H}$  NMR (400 MHz,  $\text{CDCl}_3$ ):  $\delta$  7.79 – 7.48 (m, 1H), 7.36 (t,  $J = 8.0$  Hz, 1H), 7.24 – 7.15 (m, 4H), 7.14 – 6.62 (m, 4H), 4.53 (s, 1H), 4.24 (s, 1H), 3.70 – 3.43 (m, 1H), 3.34 (t,  $J = 4.8$  Hz, 1H), 2.74 – 2.36 (m, 2H), 2.04 (s, 3H), 2.00 (s, 3H).  $^{13}\text{C}\{^1\text{H}\}$  NMR (100 MHz,  $\text{CDCl}_3$ ):  $\delta$  153.0, 152.9, 138.8, 138.7, 137.1(4), 137.1(2), 136.2(7), 136.2(6), 136.1(5), 136.1(3), 134.3, 134.2, 133.0, 132.9, 129.7, 129.5, 129.0, 128.9, 128.6(1), 128.5(5), 128.5, 126.9, 126.3(4), 126.2(9), 126.2(3), 126.2(0), 126.1, 126.0, 120.4, 45.8, 41.8, 41.5, 28.7, 28.4, 21.2(3), 21.1(7), 19.3. HRMS-ESI ( $m/z$ ): calcd for  $\text{C}_{24}\text{H}_{23}\text{INO}_2$   $[\text{M}+\text{H}]^+$ : 484.0768, found 484.0765.

**(R)-2'-Iodo-6,6'-dimethyl-[1,1'-biphenyl]-2-yl morpholine-4-carboxylate (23)**

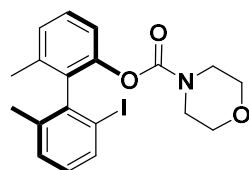

Eluent: 20:1 petroleum ether / ethyl acetate; white solid, 36.3 mg, 83% yield, 95% ee. mp: 109-110 °C. HPLC conditions: Chiralpak AD-H, isopropanol/hexanes = 3:97, flow: 1.0 mL/min,  $\lambda = 254$  nm,  $t_r = 12.068$  min (major), 10.957 min (minor).  $[\alpha]_D^{25} = -40.89$  (c 0.33,  $\text{CH}_2\text{Cl}_2$ ).  $^1\text{H}$  NMR (400 MHz,  $\text{CDCl}_3$ ):  $\delta$  7.77 (d,  $J = 7.6$  Hz, 1H), 7.35 (t,  $J = 7.6$  Hz, 1H), 7.25 – 7.24 (m, 1H),

7.20 – 7.17 (m, 2H), 6.96 (t,  $J = 8.0$  Hz, 1H), 3.62 – 3.55 (m, 1H), 3.45 – 3.31 (m, 4H), 3.11 (s, 3H), 2.05 (s, 3H), 2.01 (s, 3H).  $^{13}\text{C}\{^1\text{H}\}$  NMR (100 MHz,  $\text{CDCl}_3$ ):  $\delta$  152.7, 148.0, 141.3, 138.9, 137.2, 136.4, 136.3, 129.7, 129.2, 128.6, 127.1, 120.5, 101.1, 66.6, 66.2, 44.6, 44.1, 21.2, 19.3. HRMS-ESI ( $m/z$ ): calcd for  $\text{C}_{19}\text{H}_{21}\text{INO}_3$  [ $\text{M} + \text{H}$ ] $^+$ : 438.0561, found 438.0562.

**(*R*)-2'-Iodo-6,6'-dimethyl-[1,1'-biphenyl]-2-yl thiomorpholine-4-carboxylate (24)**

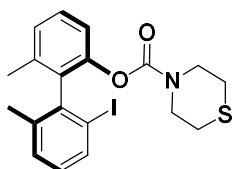

Eluent: 20:1 petroleum ether / ethyl acetate; light yellow oil, 38.9 mg, 86% yield, >99% ee. HPLC conditions: Chiralpak OD-H, isopropanol/hexanes = 2:98, flow: 0.6 mL/min,  $\lambda = 254$  nm,  $t_r = 15.747$  min (major), 17.065 min (minor).  $[\alpha]^{25}_D = -33.43$  (c 0.36,  $\text{CH}_2\text{Cl}_2$ ).  $^1\text{H}$  NMR (400 MHz,  $\text{CDCl}_3$ ):  $\delta$

7.78 (d,  $J = 8.0$  Hz, 1H), 7.30 (t,  $J = 8.0$  Hz, 1H), 7.25 (d,  $J = 8.0$  Hz, 1H), 7.05 – 7.00 (m, 2H), 6.93 (t,  $J = 8.0$  Hz, 1H), 3.44 (t,  $J = 4.4$  Hz, 4H), 2.94 – 2.89 (m, 2H), 2.77 – 2.72 (m, 2H), 2.05 (s, 3H), 1.96 (s, 3H).  $^{13}\text{C}\{^1\text{H}\}$  NMR (100 MHz,  $\text{CDCl}_3$ ):  $\delta$  152.5, 148.0, 141.3, 139.0, 137.2, 136.4, 136.3, 129.8, 129.2, 128.6, 127.1, 120.5, 101.1, 47.0, 46.5, 27.1, 26.9, 21.2, 19.3. HRMS-ESI ( $m/z$ ): calcd for  $\text{C}_{19}\text{H}_{21}\text{INO}_2\text{S}$  [ $\text{M} + \text{H}$ ] $^+$ : 454.0332, found 454.0331.

**(*R*)-2'-Iodo-6,6'-dimethyl-[1,1'-biphenyl]-2-yl 4-phenylpiperazine-1-carboxylate (25)**

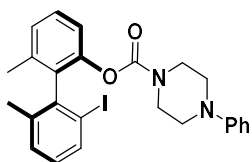

Eluent: 10:1 petroleum ether / ethyl acetate; light yellow oil, 35.3 mg, 69% yield, 97% ee. HPLC conditions: Chiralpak AD-H, isopropanol/hexanes = 2:98, flow: 1.0 mL/min,  $\lambda = 254$  nm,  $t_r = 19.535$  min (major), 20.633 min (minor).  $[\alpha]^{25}_D = -28.19$  (c 0.34,  $\text{CH}_2\text{Cl}_2$ ).  $^1\text{H}$

NMR (400 MHz,  $\text{CDCl}_3$ ):  $\delta$  7.75 (d,  $J = 8.0$  Hz, 1H), 7.35 (t,  $J = 8.0$  Hz, 1H), 7.29 – 7.26 (m, 1H), 7.25 – 7.24 (m, 1H), 7.21 – 7.16 (m, 3H), 6.92 – 6.84 (m, 4H), 3.59 – 3.43 (m, 2H), 3.28 (s, 2H), 3.10 (s, 1H), 2.89 – 2.83 (m, 2H), 2.52 (s, 1H), 2.04 (s, 3H), 1.99 (s, 3H).  $^{13}\text{C}\{^1\text{H}\}$  NMR (100 MHz,  $\text{CDCl}_3$ ):  $\delta$  152.6, 150.9, 148.0, 141.3, 138.9, 137.1, 136.3, 129.7, 129.2, 129.1, 128.6, 127.0, 120.5, 116.7, 101.1, 49.4, 49.1, 44.1, 43.7, 21.2, 19.3. HRMS-ESI ( $m/z$ ): calcd for  $\text{C}_{25}\text{H}_{26}\text{IN}_2\text{O}_2$  [ $\text{M} + \text{H}$ ] $^+$ : 513.1033, found 513.1038.

**(*R*)-2'-Iodo-6,6'-dimethyl-[1,1'-biphenyl]-2-yl butylcarbamate (26)**

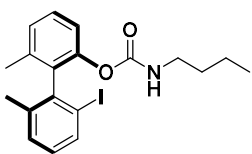

Eluent: 10:1 petroleum ether / ethyl acetate; white solid, 30.0 mg, 71% yield, 97% ee. mp: 80-81 °C. HPLC conditions: Chiralpak INC, isopropanol/hexanes = 10:90, flow: 1.0 mL/min,  $\lambda = 254$  nm,  $t_r = 6.440$

min (major), 5.965 min (minor).  $[\alpha]^{25}_{\text{D}} = -46.78$  (c 0.30,  $\text{CH}_2\text{Cl}_2$ ).  $^1\text{H}$  NMR (400 MHz,  $\text{CDCl}_3$ ):  $\delta$  7.76 (d,  $J = 7.6$  Hz, 1H), 7.33 (t,  $J = 8.0$  Hz, 1H), 7.23 (d,  $J = 7.6$  Hz, 1H), 7.16 (t,  $J = 8.0$  Hz, 2H), 6.94 (t,  $J = 8.0$  Hz, 1H), 4.62–4.52 (m, 1H), 3.10–2.83 (m, 2H), 2.05 (s, 3H), 1.98 (s, 3H), 1.39–1.11 (m, 4H), 0.89–0.80 (m, 3H).  $^{13}\text{C}\{^1\text{H}\}$  NMR (100 MHz,  $\text{CDCl}_3$ ):  $\delta$  154.1, 147.9, 141.2, 138.8, 137.2, 136.5, 136.3, 129.7, 129.0, 128.5, 126.9, 120.5, 101.0, 40.6, 31.7, 21.2, 19.6, 19.4, 13.7. HRMS-ESI ( $m/z$ ): calcd for  $\text{C}_{19}\text{H}_{23}\text{INO}_2$   $[\text{M} + \text{H}]^+$ : 424.0768, found 424.0763.

**(R)-2'-Iodo-6,6'-dimethyl-[1,1'-biphenyl]-2-yl pentylcarbamate (27)**

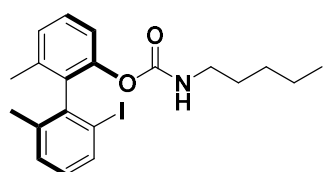

Eluent: 10:1 petroleum ether / ethyl acetate; white solid, 29.3 mg, 67% yield, 90% ee. mp: 57-58 °C. HPLC conditions: Chiralpak INC, isopropanol/hexanes = 10:90, flow: 1.0 mL/min,  $\lambda = 254$  nm,  $t_{\text{r}} = 6.398$  min (major), 5.916 min (minor).  $[\alpha]^{25}_{\text{D}} = -45.45$  (c 0.29,  $\text{CH}_2\text{Cl}_2$ ).  $^1\text{H}$  NMR (400 MHz,  $\text{CDCl}_3$ ):  $\delta$  7.76 (d,  $J = 7.6$  Hz, 1H), 7.33 (t,  $J = 8.0$  Hz, 1H), 7.22 (d,  $J = 7.6$  Hz, 1H), 7.15 (t,  $J = 7.6$  Hz, 2H), 6.94 (t,  $J = 8.0$  Hz, 1H), 4.63–4.50 (m, 1H), 3.09–2.81 (m, 2H), 2.05 (s, 3H), 1.98 (s, 3H), 1.41–1.15 (m, 6H), 0.88 (t,  $J = 7.2$  Hz, 3H).  $^{13}\text{C}\{^1\text{H}\}$  NMR (100 MHz,  $\text{CDCl}_3$ ):  $\delta$  154.0, 147.9, 141.2, 138.8, 137.2, 136.5, 136.3, 129.7, 129.0, 128.5, 126.9, 120.5, 101.0, 40.9, 29.3, 28.6, 22.2, 21.2, 19.4, 13.9. HRMS-ESI ( $m/z$ ): calcd for  $\text{C}_{20}\text{H}_{25}\text{INO}_2$   $[\text{M} + \text{H}]^+$  438.0924, found 438.0919.

**(R)-2'-Iodo-6,6'-dimethyl-[1,1'-biphenyl]-2-yl tert-butylcarbamate (28)**

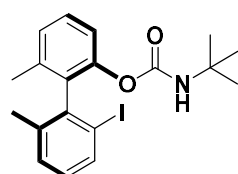

Eluent: 10:1 petroleum ether / ethyl acetate; white solid, 31.3 mg, 74% yield, 97% ee. mp: 61-63 °C. HPLC conditions: Chiralpak OD-H, isopropanol/hexanes = 1:99, flow: 0.6 mL/min,  $\lambda = 254$  nm,  $t_{\text{r}} = 14.800$  min (major), 13.779 min (minor).  $[\alpha]^{25}_{\text{D}} = -51.94$  (c 0.31,  $\text{CH}_2\text{Cl}_2$ ).  $^1\text{H}$  NMR (400 MHz,  $\text{CDCl}_3$ ):  $\delta$  7.76 (d,  $J = 8.0$  Hz, 1H), 7.32 (t,  $J = 8.0$  Hz, 1H), 7.23 (d,  $J = 7.6$  Hz, 1H), 7.16–7.11 (m, 2H), 6.94 (t,  $J = 7.6$  Hz, 1H), 4.53 (s, 1H), 2.06 (s, 3H), 1.99 (s, 3H), 1.19 (s, 9H).  $^{13}\text{C}\{^1\text{H}\}$  NMR (100 MHz,  $\text{CDCl}_3$ ):  $\delta$  152.2, 147.9, 141.2, 138.9, 137.2, 136.7, 136.3, 129.7, 128.9, 128.4, 126.9, 120.8, 101.1, 50.4, 28.5, 21.2, 19.4. HRMS-ESI ( $m/z$ ): calcd for  $\text{C}_{19}\text{H}_{23}\text{INO}_2$   $[\text{M} + \text{H}]^+$ : 424.0768, found 424.0760.

**(R)-2'-Iodo-6,6'-dimethyl-[1,1'-biphenyl]-2-yl cyclohexylcarbamate (29)**

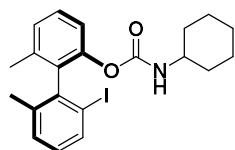

Eluent: 20:1 petroleum ether / ethyl acetate; light yellow oil, 38.3 mg, 85% yield, 96% ee. HPLC conditions: Chiralpak INC, isopropanol/hexanes = 3:97, flow: 1.0 mL/min,  $\lambda = 254$  nm,  $t_r = 9.833$  min (major), 10.594 min (minor).  $[\alpha]_D^{25} = -44.65$  (c 0.38,  $\text{CH}_2\text{Cl}_2$ ).  $^1\text{H NMR}$  (400 MHz,  $\text{CDCl}_3$ ):  $\delta$  7.76 (d,  $J = 7.6$  Hz, 1H), 7.33 (t,  $J = 7.6$  Hz, 1H), 7.23 – 7.12 (m, 3H), 6.94 (t,  $J = 8.0$  Hz, 1H), 4.51 – 4.34 (m, 1H), 3.40 – 2.96 (m, 1H), 2.05 (s, 3H), 1.98 (s, 3H), 1.89 – 1.70 (m, 2H), 1.62–1.54 (m, 2H), 1.33–0.91 (m, 6H).  $^{13}\text{C}\{^1\text{H}\}$  NMR (100 MHz,  $\text{CDCl}_3$ ):  $\delta$  153.2, 148.0, 141.1, 138.8, 137.2, 136.5, 136.3, 129.7, 129.0, 128.5, 126.9, 120.6, 101.1, 49.8, 33.3, 32.9, 25.4, 24.9, 24.7, 21.2. HRMS-ESI ( $m/z$ ): calcd for  $\text{C}_{21}\text{H}_{25}\text{INO}_2$  [ $\text{M} + \text{H}$ ] $^+$ : 450.0924, found 450.0917.

**(R)-2'-Iodo-6,6'-dimethyl-[1,1'-biphenyl]-2-yl pentan-3-ylcarbamate (30)**

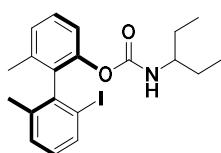

Eluent: 20:1 petroleum ether / ethyl acetate; white solid, 33.2 mg, 76% yield, 96% ee. mp: 88–89 °C. HPLC conditions: Chiralpak INC, isopropanol/hexanes = 5:95, flow: 1.0 mL/min,  $\lambda = 254$  nm,  $t_r = 5.339$  min (major), 5.739 min (minor).  $[\alpha]_D^{25} = -51.86$  (c 0.32,  $\text{CH}_2\text{Cl}_2$ ).  $^1\text{H NMR}$  (400 MHz,  $\text{CDCl}_3$ ):  $\delta$  7.76 (d,  $J = 7.6$  Hz, 1H), 7.33 (t,  $J = 7.6$  Hz, 1H), 7.22 – 7.12 (m, 3H), 6.93 (t,  $J = 7.6$  Hz, 2H), 4.33 – 4.12 (m, 1H), 3.39 – 2.98 (m, 1H), 2.05 (s, 3H), 1.99 (s, 3H), 1.50 – 1.16 (m, 4H), 0.85 (t,  $J = 7.6$  Hz, 3H), 0.69 (t,  $J = 7.2$  Hz, 3H).  $^{13}\text{C}\{^1\text{H}\}$  NMR (100 MHz,  $\text{CDCl}_3$ ):  $\delta$  153.9, 147.9, 141.2, 138.8, 137.2, 136.7, 136.3, 129.7, 129.0, 128.4, 126.9, 120.8, 101.0, 54.1, 27.6, 27.4, 21.2, 19.4, 10.1, 9.8. HRMS-ESI ( $m/z$ ): calcd for  $\text{C}_{20}\text{H}_{25}\text{INO}_2$  [ $\text{M} + \text{H}$ ] $^+$ : 438.0924, found 438.0919.

**(R)-2'-Iodo-6,6'-dimethyl-[1,1'-biphenyl]-2-yl (cyclopropylmethyl)carbamate (31)**

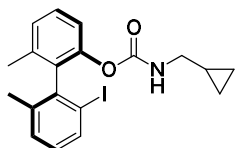

Eluent: 20:1 petroleum ether / ethyl acetate; white solid, 31.2 mg, 74% yield, 96% ee. mp: 75–77 °C. HPLC conditions: Chiralpak INC, isopropanol/hexanes = 7:93, flow: 1.0 mL/min,  $\lambda = 254$  nm,  $t_r = 8.367$  min (major), 7.809 min (minor).  $[\alpha]_D^{25} = -45.83$  (c 0.31,  $\text{CH}_2\text{Cl}_2$ ).  $^1\text{H NMR}$  (400 MHz,  $\text{CDCl}_3$ ):  $\delta$  7.76 (d,  $J = 8.0$  Hz, 1H), 7.33 (t,  $J = 7.6$  Hz, 1H), 7.23 (d,  $J = 7.6$  Hz, 1H), 7.15 (t,  $J = 6.8$  Hz, 2H), 6.94 (t,  $J = 6.8$  Hz, 1H), 4.75 – 4.58 (m, 1H), 2.97 – 2.65 (m, 2H), 2.05 (s, 3H), 1.98 (s, 3H), 0.87 – 0.81 (m, 1H), 0.44–0.33 (m, 2H), 0.11 – 0.10 (m, 2H).  $^{13}\text{C}\{^1\text{H}\}$  NMR (100 MHz,  $\text{CDCl}_3$ ):  $\delta$  154.0, 148.0, 141.2, 138.8, 137.3, 136.4, 136.3, 129.7, 129.0, 128.5, 126.9, 120.4, 101.0, 45.8,

21.2, 19.4, 10.8, 3.1. HRMS-ESI ( $m/z$ ): calcd for  $C_{19}H_{21}INO_2$  [ $M + H$ ] $^+$ : 422.0611, found 422.0606.

**(*R*)-2'-iodo-6,6'-dimethyl-[1,1'-biphenyl]-2-yl ((1*R*,2*S*,5*S*)-adamantan-2-yl)carbamate (32)**

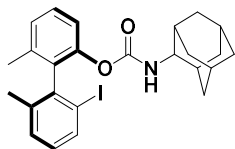

Eluent: 20:1 petroleum ether / ethyl acetate; light yellow oil, 42.1 mg, 84% yield, 91% ee. HPLC conditions: Chiralpak INC, isopropanol/hexanes = 2:98, flow: 1.0 mL/min,  $\lambda = 254$  nm,  $t_r = 13.286$  min (major), 14.205 min (minor).  $[\alpha]^{25}_D = -35.11$  (c 0.41,  $CH_2Cl_2$ ).  $^1H$  NMR (400 MHz,  $CDCl_3$ ):  $\delta$  7.76 (d,  $J = 8.0$  Hz, 1H), 7.33 (t,  $J = 8.0$  Hz, 1H), 7.22 – 7.12 (m, 3H), 6.93 (t,  $J = 7.6$  Hz, 1H), 4.90 (t,  $J = 8.0$  Hz, 1H), 3.67 – 3.31 (m, 1H), 2.05 (s, 3H), 1.99 (s, 3H), 1.81 – 1.47 (m, 14H).  $^{13}C\{^1H\}$  NMR (100 MHz,  $CDCl_3$ ):  $\delta$  153.7, 153.2, 148.0, 147.7, 141.3, 141.1, 138.9, 138.6, 137.2, 136.7, 136.3(4), 136.2(9), 129.7, 129.0, 128.5, 127.0, 120.7, 101.1, 55.8, 54.9, 37.4, 37.2, 37.0, 36.9, 31.9, 31.8, 31.6, 31.5, 31.3, 31.2, 27.0(3), 26.9(8), 21.2, 19.3. HRMS-ESI ( $m/z$ ): calcd for  $C_{25}H_{29}INO_2$  [ $M + H$ ] $^+$ : 502.1237, found 502.1230.

**(*R*)-2'-iodo-6,6'-dimethyl-[1,1'-biphenyl]-2-yl (((1*S*,3*R*)-adamantan-1-yl)methyl)carbamate (33)**

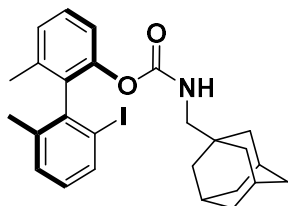

Eluent: 20:1 petroleum ether / ethyl acetate; light yellow oil, 44.3 mg, 86% yield, 98% ee. HPLC conditions: Chiralpak AD-H, isopropanol/hexanes = 5:95, flow: 1.0 mL/min,  $\lambda = 254$  nm,  $t_r = 10.229$  min (major), 9.503 min (minor).  $[\alpha]^{25}_D = -42.26$  (c 0.43,  $CH_2Cl_2$ ).  $^1H$  NMR (400 MHz,  $CDCl_3$ ):  $\delta$  7.76 (d,  $J = 8.0$  Hz, 1H), 7.33 (t,  $J = 7.6$  Hz, 1H), 7.22 – 7.10 (m, 3H), 6.94 (t,  $J = 7.6$  Hz, 1H), 4.68 – 4.56 (m, 1H), 2.05 (s, 3H), 1.99 (s, 3H), 1.93 – 1.88 (m, 2H), 1.70 – 1.67 (m, 4H), 1.58 – 1.51 (m, 3H), 1.34 – 1.19 (m, 6H).  $^{13}C\{^1H\}$  NMR (100 MHz,  $CDCl_3$ ):  $\delta$  154.5, 147.9, 141.2, 138.9, 137.2, 136.7, 136.3, 129.7, 128.9, 128.5, 127.0, 120.7, 101.1, 52.6, 39.7, 39.5, 36.8(0), 36.7(5), 33.8, 28.1, 21.2, 19.3. HRMS-ESI ( $m/z$ ): calcd for  $C_{26}H_{31}INO_2$  [ $M + H$ ] $^+$ : 516.1394, found 516.1390.

**(*R*)-2'-Iodo-6,6'-dimethyl-[1,1'-biphenyl]-2-yl (3-phenylpropyl)carbamate (34)**

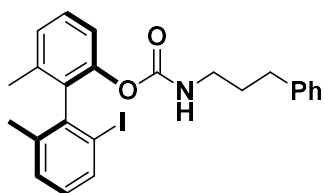

Eluent: 20:1 petroleum ether / ethyl acetate; white solid, 31.0 mg, 64% yield, 95% ee. mp: 58-59 °C. HPLC conditions: Chiralpak INC, isopropanol/hexanes = 10:90, flow: 1.0 mL/min,  $\lambda = 254$  nm,  $t_r = 7.848$  min (major), 9.436 min (minor).  $[\alpha]^{25}_D = -35.83$  (c 0.25,

CH<sub>2</sub>Cl<sub>2</sub>). <sup>1</sup>H NMR (400 MHz, CDCl<sub>3</sub>): δ 7.78 – 7.69 (m, 1H), 7.36 – 7.27 (m, 3H), 7.22 – 7.12 (m, 6H), 6.94 – 6.82 (m, 1H), 4.69 – 4.59 (m, 1H), 3.15 – 3.10 (m, 2H), 2.54 – 3.40 (m, 2H), 2.06 (s, 3H), 1.99 (s, 3H), 1.75 – 1.68 (m, 2H). <sup>13</sup>C{<sup>1</sup>H} NMR (100 MHz, CDCl<sub>3</sub>): δ 154.1, 147.8, 141.3, 141.1, 138.8, 137.3, 136.5, 136.3, 129.7, 129.0, 128.5, 128.4, 128.3, 127.0, 125.9, 120.5, 101.0, 40.4, 32.7, 31.2, 21.2, 19.4. HRMS-ESI (*m/z*): calcd for C<sub>24</sub>H<sub>25</sub>INO<sub>2</sub> [M + H]<sup>+</sup>: 486.0924, found 486.0917.

**(R)-2'-Iodo-6,6'-dimethyl-[1,1'-biphenyl]-2-yl benzylcarbamate (35)**

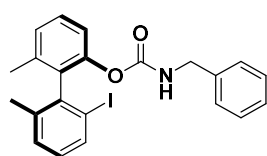

Eluent: 20:1 petroleum ether / ethyl acetate; white solid, 40.2 mg, 88% yield, 99% ee. mp: 95-96 °C. HPLC conditions: Chiralpak INC, isopropanol/hexanes = 7:93, flow: 1.0 mL/min, λ = 254 nm, t<sub>r</sub> = 11.666

min (major), 10.230 min (minor). [α]<sub>D</sub><sup>25</sup> = -42.18 (c 0.40, CH<sub>2</sub>Cl<sub>2</sub>). <sup>1</sup>H NMR (400 MHz, CDCl<sub>3</sub>): δ 7.76 (d, *J* = 7.6 Hz, 1H), 7.35 (t, *J* = 8.0 Hz, 1H), 7.32 – 7.27 (m, 2H), 7.24 (d, *J* = 7.6 Hz, 2H), 7.19 – 7.16 (m, 2H), 7.10 – 6.94 (m, 3H), 5.01 – 4.73 (m, 1H), 4.35 – 4.00 (m, 2H), 2.04 (s, 3H), 2.00 (s, 3H). <sup>13</sup>C{<sup>1</sup>H} NMR (100 MHz, CDCl<sub>3</sub>): δ 154.2, 147.8, 141.1, 138.8, 138.1, 137.4, 136.6, 136.4, 129.7, 129.0, 128.5, 127.4, 127.2, 127.1, 120.5, 101.0, 44.8, 21.2, 19.4. HRMS-ESI (*m/z*): calcd for C<sub>22</sub>H<sub>21</sub>INO<sub>2</sub> [M + H]<sup>+</sup>: 458.0611, found 458.0606.

**(R)-2'-Iodo-6,6'-dimethyl-[1,1'-biphenyl]-2-yl (4-methylbenzyl)carbamate (36)**

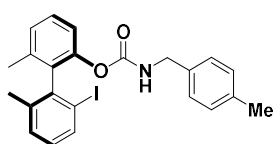

Eluent: 20:1 petroleum ether / ethyl acetate; white solid, 37.2 mg, 79% yield, 98% ee. mp: 94-95 °C. HPLC conditions: Chiralpak INC, isopropanol/hexanes = 10:90, flow: 1.0 mL/min, λ = 254 nm, t<sub>r</sub> = 9.252

min (major), 8.522 min (minor). [α]<sub>D</sub><sup>25</sup> = -45.98 (c 0.36, CH<sub>2</sub>Cl<sub>2</sub>). <sup>1</sup>H NMR (400 MHz, CDCl<sub>3</sub>): δ 7.76 (d, *J* = 7.6 Hz, 1H), 7.35 (t, *J* = 7.6 Hz, 1H), 7.25 – 7.17 (m, 3H), 7.10 (t, *J* = 7.6 Hz, 2H), 7.00 – 6.88 (m, 3H), 4.95 – 4.69 (m, 1H), 4.30 – 3.96 (m, 2H), 2.34 (s, 3H), 2.06 (s, 3H), 2.00 (s, 3H). <sup>13</sup>C{<sup>1</sup>H} NMR (100 MHz, CDCl<sub>3</sub>): δ 154.1, 147.8, 141.1, 138.8, 137.3, 137.0, 136.5, 136.3, 135.0, 129.7, 129.2, 129.0, 128.5, 127.2, 127.1, 120.5, 101.0, 44.6, 21.2, 21.1, 19.4. HRMS-ESI (*m/z*): calcd for C<sub>23</sub>H<sub>23</sub>INO<sub>2</sub> [M + H]<sup>+</sup>: 472.0768, found 472.0764.

**(R)-2'-Iodo-6,6'-dimethyl-[1,1'-biphenyl]-2-yl (4-fluorobenzyl)carbamate (37)**

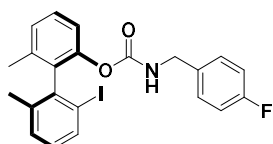

Eluent: 20:1 petroleum ether / ethyl acetate; white solid, 34.2 mg, 72% yield, 98% ee. mp: 109-110 °C. HPLC conditions: Chiralpak INC,



isopropanol/hexanes = 10:90, flow: 1.0 mL/min,  $\lambda$  = 254 nm,  $t_r$  = 7.459 min (major), 6.821 min (minor).  $[\alpha]_D^{25} = -41.11$  (c 0.34,  $\text{CH}_2\text{Cl}_2$ ).  $^1\text{H}$  NMR (400 MHz,  $\text{CDCl}_3$ ):  $\delta$  7.78 (d,  $J$  = 8.0 Hz, 1H), 7.37 (t,  $J$  = 8.0 Hz, 1H), 7.25 – 7.17 (m, 3H), 7.09 – 6.96 (m, 5H), 5.04 – 4.79 (m, 1H), 4.33 – 4.01 (m, 2H), 2.05 (s, 3H), 2.01 (s, 3H).  $^{13}\text{C}\{^1\text{H}\}$  NMR (100 MHz,  $\text{CDCl}_3$ ):  $\delta$  162.1 (d,  $J$  = 244.0 Hz), 154.2, 147.7, 141.1, 138.8, 137.4, 136.5, 136.4, 133.9 (d,  $J$  = 2.9 Hz), 129.7, 129.0, 128.9 (d,  $J$  = 8.1 Hz), 128.6, 127.2, 120.5, 115.3 (d,  $J$  = 21.3 Hz), 101.0, 44.1, 21.2, 19.4.  $^{19}\text{F}$  NMR (376 MHz,  $\text{CDCl}_3$ ):  $\delta$  -115.23 (s). HRMS-ESI ( $m/z$ ): calcd for  $\text{C}_{22}\text{H}_{20}\text{FINO}_2$   $[\text{M} + \text{H}]^+$ : 476.0517, found 476.0510.

**(R)-2'-Iodo-6,6'-dimethyl-[1,1'-biphenyl]-2-yl (4-chlorobenzyl)carbamate (38)**

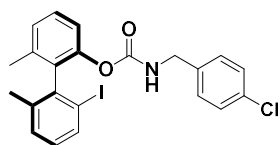

Eluent: 20:1 petroleum ether / ethyl acetate; white solid, 38.2 mg, 78% yield, 98% ee. mp: 111-112 °C. HPLC conditions: Chiralpak INC, isopropanol/hexanes = 10:90, flow: 1.0 mL/min,  $\lambda$  = 254 nm,  $t_r$  = 7.548 min (major), 6.882 min (minor).  $[\alpha]_D^{25} = -45.48$  (c 0.38,  $\text{CH}_2\text{Cl}_2$ ).  $^1\text{H}$  NMR (400 MHz,  $\text{CDCl}_3$ ):  $\delta$  7.76 (d,  $J$  = 7.6 Hz, 1H), 7.34 (t,  $J$  = 8.0 Hz, 1H), 7.24 – 7.13 (m, 5H), 7.01 – 6.88 (m, 3H), 5.05 – 4.93 (m, 1H), 4.30 – 3.97 (m, 2H), 2.03 (s, 3H), 1.99 (s, 3H).  $^{13}\text{C}\{^1\text{H}\}$  NMR (100 MHz,  $\text{CDCl}_3$ ):  $\delta$  154.2, 147.7, 141.0, 138.8, 137.4, 136.7, 136.5, 136.4, 133.1, 129.7, 129.0, 128.6(0), 128.5(5), 128.5, 127.2, 120.5, 101.0, 44.1, 21.2, 19.3. HRMS-ESI ( $m/z$ ): calcd for  $\text{C}_{22}\text{H}_{20}\text{ClINO}_2$   $[\text{M} + \text{H}]^+$ : 492.0222, found 492.0213.

**(R)-2'-Iodo-6,6'-dimethyl-[1,1'-biphenyl]-2-yl (4-bromobenzyl)carbamate (39)**

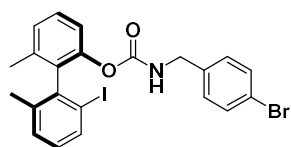

Eluent: 20:1 petroleum ether / ethyl acetate; white solid, 44.9 mg, 84% yield, 98% ee. mp: 127-129 °C. HPLC conditions: Chiralpak INC, isopropanol/hexanes = 10:90, flow: 1.0 mL/min,  $\lambda$  = 254 nm,  $t_r$  = 7.862 min (major), 7.122 min (minor).  $[\alpha]_D^{25} = -40.83$  (c 0.48,  $\text{CH}_2\text{Cl}_2$ ).  $^1\text{H}$  NMR (400 MHz,  $\text{CDCl}_3$ ):  $\delta$  7.76 (d,  $J$  = 8.0 Hz, 1H), 7.42 – 7.33 (m, 3H), 7.22 – 7.14 (m, 3H), 6.98 – 6.83 (m, 3H), 5.01 – 4.78 (m, 1H), 4.30 – 3.92 (m, 2H), 2.02 (s, 3H), 1.99 (s, 3H).  $^{13}\text{C}\{^1\text{H}\}$  NMR (100 MHz,  $\text{CDCl}_3$ ):  $\delta$  154.2, 147.7, 141.0, 138.8, 137.4, 137.2, 136.6, 136.4, 131.6, 129.7, 129.1, 128.9, 128.6, 127.3, 121.2, 120.5, 101.0, 44.2, 21.2, 19.4. HRMS-ESI ( $m/z$ ): calcd for  $\text{C}_{22}\text{H}_{20}\text{BrINO}_2$   $[\text{M} + \text{H}]^+$ : 535.9717, found 535.9710.

**(R)-2'-Iodo-6,6'-dimethyl-[1,1'-biphenyl]-2-yl (4-methoxybenzyl)carbamate (40)**

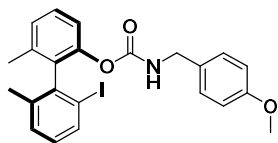

Eluent: 20:1 petroleum ether / ethyl acetate; white solid, 35.6 mg, 73% yield, 98% ee. mp: 108-109 °C. HPLC conditions: Chiralpak INC, isopropanol/hexanes = 10:90, flow: 1.0 mL/min,  $\lambda = 254$  nm,  $t_r = 12.691$  min (major), 11.418 min (minor).  $[\alpha]_D^{25} = -46.11$  (c 0.35, CH<sub>2</sub>Cl<sub>2</sub>). <sup>1</sup>H NMR (400 MHz, CDCl<sub>3</sub>):  $\delta$  7.76 (d,  $J = 7.6$  Hz, 1H), 7.35 (t,  $J = 7.6$  Hz, 1H), 7.23 – 7.16 (m, 3H), 7.04 – 6.93 (m, 3H), 4.96 – 4.70 (m, 1H), 4.27 – 3.94 (m, 2H), 3.80 (s, 3H), 2.05 (s, 3H), 1.99 (s, 3H). <sup>13</sup>C{<sup>1</sup>H} NMR (100 MHz, CDCl<sub>3</sub>):  $\delta$  158.9, 154.1, 147.8, 141.1, 138.7, 137.3, 136.5, 136.3, 130.2, 129.7, 129.0, 128.6, 128.5, 127.1, 120.5, 113.9, 101.0, 55.3, 44.4, 21.2, 19.3. HRMS-ESI ( $m/z$ ): calcd for C<sub>23</sub>H<sub>23</sub>INO<sub>3</sub> [M + H]<sup>+</sup>: 487.0717, found 487.0710.

**(R)-2'-Iodo-6,6'-dimethyl-[1,1'-biphenyl]-2-yl (2-bromobenzyl)carbamate (41)**

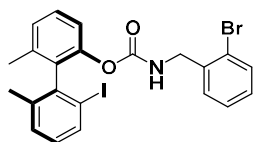

Eluent: 20:1 petroleum ether / ethyl acetate; white solid, 39.0 mg, 73% yield, 97% ee. mp: 123-125 °C. HPLC conditions: Chiralpak INC, isopropanol/hexanes = 10:90, flow: 1.0 mL/min,  $\lambda = 254$  nm,  $t_r = 10.140$  min (major), 9.243 min (minor).  $[\alpha]_D^{25} = -27.89$  (c 0.38, CH<sub>2</sub>Cl<sub>2</sub>). <sup>1</sup>H NMR (400 MHz, CDCl<sub>3</sub>):  $\delta$  7.75 (d,  $J = 8.0$  Hz, 1H), 7.52 (d,  $J = 8.0$  Hz, 1H), 7.34 (t,  $J = 8.0$  Hz, 1H), 7.25 (t,  $J = 6.8$  Hz, 1H), 7.18 – 7.11 (m, 5H), 6.93 (t,  $J = 8.4$  Hz, 1H), 5.17 – 4.99 (m, 1H), 4.38 – 4.07 (m, 2H), 1.99 (s, 3H), 1.98 (s, 3H). <sup>13</sup>C{<sup>1</sup>H} NMR (100 MHz, CDCl<sub>3</sub>):  $\delta$  154.1, 147.8, 140.9, 138.7, 137.3, 137.1, 136.6, 136.3, 132.6, 129.6(9), 129.6(7), 129.0(2), 128.9(9), 128.5, 127.5, 127.2, 123.4, 120.6, 100.9, 45.2, 21.1, 19.3. HRMS-ESI ( $m/z$ ): calcd for C<sub>22</sub>H<sub>20</sub>BrINO<sub>2</sub> [M + H]<sup>+</sup>: 535.9717, found 535.9714.

**(R)-2'-Iodo-6,6'-dimethyl-[1,1'-biphenyl]-2-yl (2-methoxybenzyl)carbamate (42)**

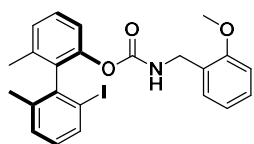

Eluent: 20:1 petroleum ether / ethyl acetate; light yellow oil, 29.2 mg, 60% yield, 97% ee. HPLC conditions: Chiralpak INC, isopropanol/hexanes = 10:90, flow: 1.0 mL/min,  $\lambda = 254$  nm,  $t_r = 22.637$  min (major), 19.918 min (minor).  $[\alpha]_D^{25} = -27.90$  (c 0.28, CH<sub>2</sub>Cl<sub>2</sub>). <sup>1</sup>H NMR (400 MHz, CDCl<sub>3</sub>):  $\delta$  7.78 – 7.72 (m, 1H), 7.33 (t,  $J = 7.6$  Hz, 1H), 7.27 (d,  $J = 7.2$  Hz, 1H), 7.24 – 7.07 (m, 4H), 6.92 – 6.83 (m, 3H), 5.14 – 5.04 (m, 1H), 4.26 – 3.97 (m, 2H), 3.79 (s, 3H), 2.06 (s, 3H), 1.97 (s, 3H). <sup>13</sup>C{<sup>1</sup>H} NMR (100 MHz, CDCl<sub>3</sub>):  $\delta$  157.2, 154.2, 147.9, 141.1, 138.8, 137.2, 136.5, 136.2, 129.7,

129.1, 128.9, 128.7, 128.4, 126.9, 126.2, 120.6, 120.4, 110.0, 101.0, 55.1, 40.7, 21.1, 19.4.  
HRMS-ESI ( $m/z$ ): calcd for  $C_{23}H_{23}INO_3$  [ $M + H$ ] $^+$ : 487.0717, found 487.0711.

**(*R*)-2'-Iodo-6,6'-dimethyl-[1,1'-biphenyl]-2-yl (3-methoxybenzyl)carbamate (43)**

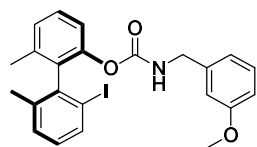

Eluent: 20:1 petroleum ether / ethyl acetate; light yellow oil, 38.0 mg,  
78% yield, 98% ee. HPLC conditions: Chiralpak INC,  
isopropanol/hexanes = 10:90, flow: 1.0 mL/min,  $\lambda$  = 254 nm,  $t_r$  = 12.792

min (major), 11.407 min (minor).  $[\alpha]^{25}_D = -43.40$  (c 0.37,  $CH_2Cl_2$ ).  $^1H$  NMR (400 MHz,  $CDCl_3$ ):  $\delta$  7.76 (d,  $J$  = 8.0 Hz, 1H), 7.35 (t,  $J$  = 8.0 Hz, 1H), 7.23 – 7.17 (m, 4H), 6.94 (t,  $J$  = 8.0 Hz, 1H), 6.80 (d,  $J$  = 8.4 Hz, 1H), 6.70 – 6.61 (m, 2H), 5.02 – 4.79 (m, 1H), 4.30 – 3.95 (m, 2H), 3.79 (s, 3H), 2.04 (s, 3H), 2.00 (s, 3H).  $^{13}C\{^1H\}$  NMR (100 MHz,  $CDCl_3$ ):  $\delta$  159.7, 154.1, 147.8, 141.0, 139.6, 138.7, 137.3, 136.5, 136.3, 129.7, 129.6, 129.0, 128.5, 127.1, 120.4, 119.5, 112.9, 112.8, 101.0, 55.2, 44.9, 21.2, 19.3. HRMS-ESI ( $m/z$ ): calcd for  $C_{23}H_{23}INO_3$  [ $M + H$ ] $^+$ : 487.0717, found 487.0712.

**(*R*)-2'-Iodo-6,6'-dimethyl-[1,1'-biphenyl]-2-yl (2-phenylpropan-2-yl)carbamate (44)**

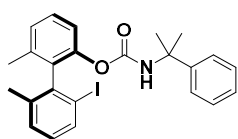

Eluent: 20:1 petroleum ether / ethyl acetate; white solid, 38.8 mg, 80%  
yield, 98% ee. mp: 105-106 °C. HPLC conditions: Chiralpak INC,  
isopropanol/hexanes = 10:90, flow: 0.5 mL/min,  $\lambda$  = 254 nm,  $t_r$  = 10.561

min (major), 10.237 min (minor).  $[\alpha]^{25}_D = -58.99$  (c 0.28,  $CH_2Cl_2$ ).  $^1H$  NMR (400 MHz,  $CDCl_3$ ):  $\delta$  7.82 (d,  $J$  = 7.6 Hz, 1H), 7.32 – 7.28 (m, 4H), 7.23 – 7.19 (m, 3H), 7.15 – 7.09 (m, 2H), 7.02 (t,  $J$  = 7.6 Hz, 1H), 5.03 (s, 1H), 1.98 (s, 3H), 1.97 (s, 3H), 1.61 (s, 3H), 1.53 (s, 3H).  $^{13}C\{^1H\}$  NMR (100 MHz,  $CDCl_3$ ):  $\delta$  152.0, 147.7, 146.5, 141.2, 139.0, 137.2, 136.3, 129.8, 129.0, 128.4, 128.2, 127.0, 126.6, 124.7, 120.9, 101.2, 55.3, 29.6, 28.4, 21.1, 19.4. HRMS-ESI ( $m/z$ ): calcd for  $C_{24}H_{25}INO_2$  [ $M + H$ ] $^+$ : 486.0924, found 486.0921.

**(*R*)-2'-Iodo-6,6'-dimethyl-[1,1'-biphenyl]-2-yl (naphthalen-1-ylmethyl)carbamate (45)**

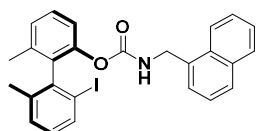

Eluent: 10:1 petroleum ether / ethyl acetate; white solid, 44.1 mg, 87%  
yield, 98% ee. mp: 73-75 °C. HPLC conditions: Chiralpak INC,  
isopropanol/hexanes = 10:90, flow: 1.0 mL/min,  $\lambda$  = 254 nm,  $t_r$  = 13.425

min (major), 11.861 min (minor).  $[\alpha]^{25}_D = -37.76$  (c 0.43,  $CH_2Cl_2$ ).  $^1H$  NMR (400 MHz,  $CDCl_3$ ):  $\delta$  7.92 – 7.86 (m, 2H), 7.80 (d,  $J$  = 8.4 Hz, 1H), 7.72 (d,  $J$  = 8.0 Hz, 1H), 7.56 – 7.51 (m, 2H), 7.41 –

7.35 (m, 2H), 7.23 – 7.13 (m, 4H), 6.88 (t,  $J = 7.6$  Hz, 1H), 5.02 – 4.90 (m, 1H), 4.38 – 4.39 (m, 2H), 2.04 (s, 3 H), 2.01 (s, 3 H).  $^{13}\text{C}\{^1\text{H}\}$  NMR (100 MHz,  $\text{CDCl}_3$ ):  $\delta$  153.9, 147.8, 141.0, 138.6, 137.3, 136.5, 136.3, 133.7, 133.2, 131.1, 129.7, 128.9, 128.7, 128.5, 128.4, 127.1, 126.5, 125.8, 125.7, 125.3, 123.1, 120.5, 100.9, 43.0, 21.2, 19.3. HRMS-ESI ( $m/z$ ): calcd for  $\text{C}_{26}\text{H}_{23}\text{INO}_2$  [ $\text{M} + \text{H}$ ] $^+$ : 508.0768, found 508.0761.

**(*R*)-2'-Iodo-6,6'-dimethyl-[1,1'-biphenyl]-2-yl (furan-2-ylmethyl)carbamate (46)**

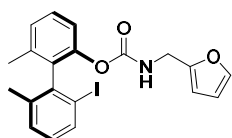

Eluent: 20:1 petroleum ether / ethyl acetate; light yellow oil, 35.8 mg, 80% yield, 99% ee. HPLC conditions: Chiralpak INC, isopropanol/hexanes = 10:90, flow: 1.0 mL/min,  $\lambda = 254$  nm,  $t_r = 9.250$  min (major), 8.492 min (minor).  $[\alpha]_D^{25} = -39.38$  (c 0.35,  $\text{CH}_2\text{Cl}_2$ ).  $^1\text{H}$  NMR (400 MHz,  $\text{CDCl}_3$ ):  $\delta$  7.75 (d,  $J = 7.6$  Hz, 1H), 7.34 (t,  $J = 7.6$  Hz, 2H), 7.21 – 7.15 (m, 3H), 6.94 (d,  $J = 8.0$  Hz, 1H), 6.30 – 6.26 (m, 1H), 6.10 – 6.00 (m, 1H), 5.00 – 4.80 (m, 1H), 4.26 – 3.84 (m, 2H), 2.03 (s, 3H), 1.98 (s, 3H).  $^{13}\text{C}\{^1\text{H}\}$  NMR (100 MHz,  $\text{CDCl}_3$ ):  $\delta$  153.9, 151.2, 147.8, 142.1, 141.0, 138.7, 137.3, 136.4, 136.3, 129.7, 129.0, 128.5, 127.1, 120.4, 110.3, 107.2, 100.9, 38.0, 21.2, 19.4. HRMS-ESI ( $m/z$ ): calcd for  $\text{C}_{20}\text{H}_{19}\text{INO}_3$  [ $\text{M} + \text{H}$ ] $^+$ : 448.0404, found 448.0398.

**(*R*)-2'-Iodo-6,6'-dimethyl-[1,1'-biphenyl]-2-yl (thiophen-2-ylmethyl)carbamate (47)**

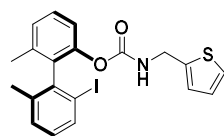

Eluent: 20:1 petroleum ether / ethyl acetate; light yellow oil, 36.6 mg, 79% yield, 98% ee. HPLC conditions: Chiralpak INC, isopropanol/hexanes = 10:90, flow: 1.0 mL/min,  $\lambda = 254$  nm,  $t_r = 8.790$  min (major), 8.008 min (minor).  $[\alpha]_D^{25} = -44.10$  (c 0.36,  $\text{CH}_2\text{Cl}_2$ ).  $^1\text{H}$  NMR (400 MHz,  $\text{CDCl}_3$ ):  $\delta$  7.75 (d,  $J = 7.6$  Hz, 1H), 7.35 (t,  $J = 7.6$  Hz, 1H), 7.21 – 7.16 (m, 4H), 6.96 – 6.91 (m, 2H), 6.84 – 6.74 (m, 1H), 5.05 – 4.78 (m, 1H), 4.49 – 4.05 (m, 2H), 2.04 (s, 3H), 1.99 (s, 3H).  $^{13}\text{C}\{^1\text{H}\}$  NMR (100 MHz,  $\text{CDCl}_3$ ):  $\delta$  153.8, 147.8, 141.0, 140.8, 138.7, 137.3, 136.4, 136.3, 129.8, 129.0, 128.5, 127.1, 126.8, 125.7, 125.0, 120.4, 100.9, 39.8, 21.2, 19.4. HRMS-ESI ( $m/z$ ): calcd for  $\text{C}_{20}\text{H}_{19}\text{INO}_2\text{S}$  [ $\text{M} + \text{H}$ ] $^+$ : 464.0176, found 464.0172.

***Tert*-butyl (*R*)-*N*-(((2'-iodo-6,6'-dimethyl-[1,1'-biphenyl]-2-yl)oxy)carbonyl)-*N*-methylglycinate (48)**

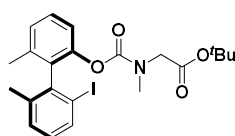

Eluent: 10:1 petroleum ether / ethyl acetate; light yellow oil, 25.7 mg, 67% yield, 98% ee. HPLC conditions: Chiralpak AD-H, isopropanol/hexanes = 2:98, flow: 1.0 mL/min,  $\lambda = 254$  nm,  $t_r = 11.388$  min (major), 12.275 min

(minor).  $[\alpha]_D^{25} = -45.02$  (c 0.25,  $\text{CH}_2\text{Cl}_2$ ).  $^1\text{H NMR}$  (400 MHz,  $\text{CDCl}_3$ ):  $\delta$  7.76 (d,  $J = 7.6$  Hz, 1H), 7.33 (td,  $J = 8.0, 2.4$  Hz, 1H), 7.23 (t,  $J = 8.4$  Hz, 2H), 7.15 (m, 1H), 6.95 (t,  $J = 7.6$  Hz, 1H), 3.79 (s, 1H), 3.56 – 3.34 (m, 1H), 2.89 (s, 1.4H), 2.60 (s, 1.6H), 2.03 (s, 3H), 1.99 (d,  $J = 8.4$  Hz, 3H), 1.43 (s, 9H).  $^{13}\text{C}\{^1\text{H}\}$  NMR (100 MHz,  $\text{CDCl}_3$ ):  $\delta$  168.1, 153.7, 148.1, 141.2, 138.6, 137.0, 136.2, 135.9, 129.7, 129.0, 128.4, 126.7, 120.2, 101.0, 81.6, 51.4, 51.1, 35.9, 35.1, 28.0, 21.2, 19.4. HRMS-ESI ( $m/z$ ): calcd for  $\text{C}_{22}\text{H}_{27}\text{INO}_4$  [ $\text{M} + \text{H}$ ] $^+$ : 496.0979, found 496.0972.

***Tert*-butyl (*R*)-((2'-iodo-6,6'-dimethyl-[1,1'-biphenyl]-2-yl)oxy)carbonyl)glycinate (49)**

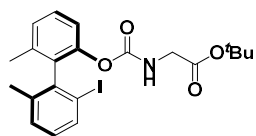

Eluent: 10:1 petroleum ether / ethyl acetate; light yellow oil, 35.1mg, 73% yield, 98% ee. HPLC conditions: Chiralpak AD-H, isopropanol/hexanes = 5:95, flow: 1.0 mL/min,  $\lambda = 254$  nm,  $t_r = 17.573$

min (major), 21.320 min (minor).  $[\alpha]_D^{25} = -39.88$  (c 0.34,  $\text{CH}_2\text{Cl}_2$ ).  $^1\text{H NMR}$  (400 MHz,  $\text{CDCl}_3$ ):  $\delta$  7.76 (d,  $J = 7.6$  Hz, 1H), 7.33 (t,  $J = 7.6$  Hz, 1H), 7.23 (t,  $J = 7.6$  Hz, 1H), 7.16 (d,  $J = 7.6$  Hz, 2H), 6.94 (t,  $J = 8.0$  Hz, 1H), 5.15 – 4.92 (m, 1H), 3.83 – 3.27 (m, 2H), 2.03 (s, 3H), 1.98 (s, 3H), 1.45 (s, 9H).  $^{13}\text{C}\{^1\text{H}\}$  NMR (100 MHz,  $\text{CDCl}_3$ ):  $\delta$  168.6, 153.9, 147.8, 141.0, 138.6, 137.4, 136.4, 136.2, 129.7, 129.1, 128.5, 127.0, 120.2, 100.9, 82.2, 43.4, 28.0, 21.2, 19.4. HRMS-ESI ( $m/z$ ): calcd for  $\text{C}_{21}\text{H}_{25}\text{INO}_4$  [ $\text{M} + \text{H}$ ] $^+$ : 482.0823, found 482.0815.

**Ethyl (*R*)-*N*-benzyl-*N*-((2'-iodo-6,6'-dimethyl-[1,1'-biphenyl]-2-yl)oxy)carbonyl)glycinate (50)**

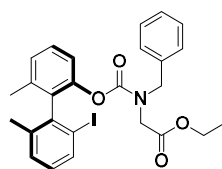

Eluent: 10:1 petroleum ether / ethyl acetate; light yellow oil, 39.1 mg, 72% yield, >99% ee. HPLC conditions: Chiralpak AD-H, isopropanol/hexanes = 2:98, flow: 0.8 mL/min,  $\lambda = 254$  nm,  $t_r = 31.458$  min (major), 33.772 min (minor).  $[\alpha]_D^{25} = -49.36$  (c 0.39,  $\text{CH}_2\text{Cl}_2$ ).  $^1\text{H NMR}$  (400 MHz,  $\text{CDCl}_3$ ):  $\delta$

7.74 (dd,  $J = 10.8, 8.0$  Hz, 1H), 7.36 (t,  $J = 7.6$  Hz, 1H), 7.32 – 7.27 (m, 2H), 7.25 – 7.20 (m, 3H), 7.18 (d,  $J = 7.6$  Hz, 1H), 7.03 (dd,  $J = 7.2, 2.0$  Hz, 1H), 6.95 (td,  $J = 7.6, 3.2$  Hz, 1H), 6.86 – 6.82 (m, 1H), 4.61 – 4.08 (m, 4H), 3.87 – 3.75 (m, 1H), 3.56 – 3.33 (m, 1H), 2.05 (s, 3H), 2.00 (s, 3H), 1.23 (dt,  $J = 7.6, 3.2$  Hz, 1H).  $^{13}\text{C}\{^1\text{H}\}$  NMR (100 MHz,  $\text{CDCl}_3$ ):  $\delta$  169.0, 154.0, 148.0, 141.2, 138.8, 137.2, 136.5, 136.4, 136.1, 129.8, 129.1, 128.6, 128.5, 128.0, 127.8, 127.5, 127.1, 127.0, 120.4, 100.9, 61.1, 51.3, 47.3, 21.2, 19.4, 14.2. HRMS-ESI ( $m/z$ ): calcd for  $\text{C}_{26}\text{H}_{27}\text{INO}_4$  [ $\text{M} + \text{H}$ ] $^+$ : 544.0979, found 544.0980.

***Tert*-butyl (((*R*)-2'-iodo-6,6'-dimethyl-[1,1'-biphenyl]-2-yl)oxy)carbonyl)-L-alaninate (51)**

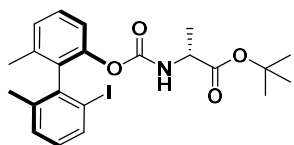

Eluent: 20:1 petroleum ether / ethyl acetate; light yellow oil, 36.6 mg, 74% yield, >99:1 dr. HPLC conditions: Chiralpak INC, isopropanol/hexanes = 10:90, flow: 1.0 mL/min,  $\lambda = 254$  nm,  $t_r = 6.398$  min (major), 7.089 min (minor).  $[\alpha]_D^{25} = -55.08$  (c 0.33,  $\text{CH}_2\text{Cl}_2$ ).  $^1\text{H}$  NMR (400 MHz,  $\text{CDCl}_3$ ):  $\delta$  7.76 (d,  $J = 7.6$  Hz, 1H), 7.32 (t,  $J = 8.0$  Hz, 1H), 7.16 (td,  $J = 21.6, 7.4$  Hz, 3H), 6.94 (t,  $J = 7.6$  Hz, 1H), 5.26 – 5.11 (m, 1H), 4.17 – 3.54 (m, 1H), 2.05 (s, 3H), 1.98 (s, 3H), 1.44 (s, 9H), 1.20 – 1.08 (m, 3H).  $^{13}\text{C}\{^1\text{H}\}$  NMR (100 MHz,  $\text{CDCl}_3$ ):  $\delta$  171.7, 153.2, 147.9, 140.9, 138.7, 137.3, 136.5, 136.4, 129.7, 129.0, 128.5, 127.1, 120.4, 101.0, 82.0, 50.1, 27.9, 21.1, 19.3, 18.6. HRMS-ESI ( $m/z$ ): calcd for  $\text{C}_{22}\text{H}_{27}\text{INO}_4$   $[\text{M}+\text{H}]^+$ : 496.0979, found 496.0970.

***Tert*-butyl (((*R*)-2'-iodo-6,6'-dimethyl-[1,1'-biphenyl]-2-yl)oxy)carbonyl)-L-tyrosinate (52)**

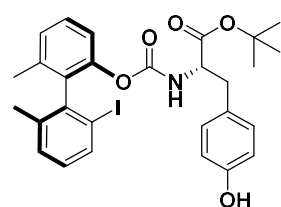

Eluent: 10:1 petroleum ether / ethyl acetate; light yellow oil, 41.7 mg, 71% yield, 98.5:1.5 dr. HPLC conditions: Chiralpak AD-H, isopropanol/hexanes = 10:90, flow: 1.0 mL/min,  $\lambda = 254$  nm,  $t_r = 47.311$  min (major), 43.102 min (minor).  $[\alpha]_D^{25} = -50.52$  (c 0.48,  $\text{CH}_2\text{Cl}_2$ ).  $^1\text{H}$  NMR (400 MHz,  $\text{CDCl}_3$ ):  $\delta$  7.78 – 7.71 (m, 1H), 7.38 – 7.30 (m, 1H), 7.23 (d,  $J = 7.6$  Hz, 1H), 7.20 – 7.09 (m, 2H), 6.97 (t,  $J = 7.6$  Hz, 1H), 6.88 – 6.60 (m, 4H), 5.26 – 5.06 (m, 1H), 4.43 – 4.12 (m, 1H), 2.98 – 2.29 (m, 2H), 2.10 (s, 1H), 2.01 (s, 3H), 1.98 (s, 3H), 1.39 (s, 9H).  $^{13}\text{C}\{^1\text{H}\}$  NMR (100 MHz,  $\text{CDCl}_3$ ):  $\delta$  170.2, 154.8, 153.3, 147.6, 141.0, 138.5, 137.4, 136.5, 136.3, 130.6, 129.7, 129.1, 128.4, 127.4, 127.1, 120.3, 115.3, 100.8, 82.4, 55.3, 37.3, 27.9, 21.3, 19.4. HRMS-ESI ( $m/z$ ): calcd for  $\text{C}_{28}\text{H}_{29}\text{INO}_5$   $[\text{M} + \text{H}]^+$ : 586.1096, found 586.1094.

***(R)*-2'-Iodo-6,6'-dimethyl-[1,1'-biphenyl]-2-yl (2-(5-methoxy-1*H*-indol-3-yl)ethyl)carbamate (53)**

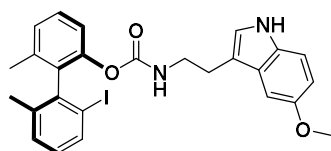

Eluent: 20:1 petroleum ether / ethyl acetate; yellow oil, 30.2 mg, 56% yield, 90% ee. HPLC conditions: Chiralpak INC, isopropanol/hexanes = 15:85, flow: 1.0 mL/min,  $\lambda = 254$  nm,  $t_r = 19.509$  min (major), 16.235 min (minor).  $[\alpha]_D^{25} = -29.07$  (c 0.29,  $\text{CH}_2\text{Cl}_2$ ).  $^1\text{H}$  NMR (400 MHz,  $\text{CDCl}_3$ ):  $\delta$  7.96 (s, 1H), 7.75 (d,  $J = 7.6$  Hz, 1H), 7.34 (t,  $J = 8.0$  Hz, 1H), 7.25 – 7.13 (m, 4H), 6.99 – 6.91 (m, 2H), 6.88 – 6.81 (m, 2H), 4.80 – 4.55 (m, 1H), 3.85 (s, 3H), 3.41 – 3.16 (m, 2H), 2.84 – 2.46 (m, 2H), 2.06 (s, 3H), 1.98 (s, 3H).  $^{13}\text{C}\{^1\text{H}\}$  NMR (100 MHz,  $\text{CDCl}_3$ ):  $\delta$  154.1, 154.0,

147.9, 141.2, 138.8, 137.3, 136.4, 136.3, 131.4, 129.7, 129.0, 128.5, 127.5, 127.0, 122.9, 120.4, 112.3, 112.2, 111.9, 101.1, 100.5, 56.0, 41.0, 25.5, 21.2, 19.4. HRMS-ESI ( $m/z$ ): calcd for  $C_{26}H_{26}IN_2O_3$  [ $M + H$ ] $^+$ : 541.0983, found 541.0976.

**(*R*)-2'-Iodo-6,6'-dimethyl-[1,1'-biphenyl]-2-yl (((1*R*,4*aS*,10*aR*)-7-isopropyl-1,4*a*-dimethyl-1,2,3,4,4*a*,9,10,10*a*-octahydrophenanthren-1-yl)methyl)carbamate (54)**

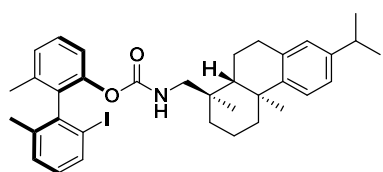

Eluent: 10:1 petroleum ether / ethyl acetate; light yellow oil (48.9 mg, 77% yield, 97:3 dr. HPLC conditions: Chiralpak AD-H, isopropanol/hexanes = 5:95, flow: 1.0 mL/min,  $\lambda$  = 254 nm,  $t_r$  = 7.091 min (major), 7.786 min (minor).  $[\alpha]_D^{25}$  =

-28.43 (c 0.49,  $CH_2Cl_2$ ).  $^1H$  NMR (400 MHz,  $CDCl_3$ ):  $\delta$  7.64 (t,  $J$  = 8.0 Hz, 1H), 7.32 (t,  $J$  = 8.0 Hz, 1H), 7.20 – 7.10 (m, 3H), 7.03 (t,  $J$  = 8.4 Hz, 1H), 6.90 (s, 1H), 6.82 – 6.73 (m, 2H), 4.67 – 4.51 (m, 1H), 3.18 – 3.13 (m, 1H), 2.90 – 2.73 (m, 5H), 2.28 – 2.25 (m, 1H), 1.97 (s, 3H), 1.85 (s, 3H), 1.73 – 1.63 (m, 4H), 1.35 – 1.27 (m, 2H), 1.26 (s, 3H), 1.24 (s, 3H), 1.19 (s, 3H), 1.18 – 1.08 (m, 2H), 0.87 (s, 3H).  $^{13}C\{^1H\}$  NMR (100 MHz,  $CDCl_3$ ):  $\delta$  154.3, 147.7, 147.2, 145.6, 141.0, 138.5, 137.2, 136.5, 136.1, 134.8, 129.6, 128.9, 128.4, 126.9, 123.9, 123.7, 120.6, 100.7, 51.3, 44.1, 38.1, 37.5, 37.2, 35.6, 33.5, 29.8, 25.3, 24.1, 24.0, 21.0, 19.3, 18.8, 18.7, 18.4. HRMS-ESI ( $m/z$ ): calcd for  $C_{35}H_{43}INO_2$  [ $M + H$ ] $^+$ : 636.2333, found 636.2327.

**(*R*)-2'-Iodo-6,6'-dimethyl-[1,1'-biphenyl]-2-yl**

**(1*R*,3*R*,5*S*)-3-hydroxy-8-azabicyclo[3.2.1]octane-8-carboxylate (55)**

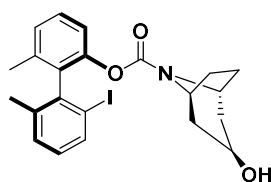

Eluent: 10:1 petroleum ether / ethyl acetate; white solid, 13.2 mg, 30% yield, 95:5 dr. mp: 89-90 °C. HPLC conditions: Chiralpak INC, isopropanol/hexanes = 5:95, flow: 1.0 mL/min,  $\lambda$  = 254 nm,  $t_r$  = 23.040 min (major), 21.307 min (minor).  $[\alpha]_D^{25}$  = -28.03 (c 0.13,  $CH_2Cl_2$ ).  $^1H$

NMR (400 MHz,  $CDCl_3$ ):  $\delta$  7.76 (d,  $J$  = 8.0 Hz, 1H), 7.34 (t,  $J$  = 8.0 Hz, 1H), 7.23 – 7.12 (m, 3H), 7.21 (q,  $J$  = 7.2 Hz, 1H), 4.18 – 4.13 (m, 1H), 3.96 (s, 1H), 3.82 – 3.71 (m, 1H), 2.07 (s, 3H), 2.03 (s, 1H), 1.98 (s, 3H), 1.90 – 1.75 (m, 2H), 1.71 – 1.42 (m, 4H), 1.33 – 1.25 (m, 1H), 0.92 – 1.86 (dt,  $J$  = 14.8, 4.0 Hz, 1H).  $^{13}C\{^1H\}$  NMR (100 MHz,  $CDCl_3$ ):  $\delta$  150.9, 150.8, 148.0, 147.9, 141.6(1), 141.5(8), 139.1, 138.9, 137.1, 136.6, 136.4, 136.3, 136.1, 129.6, 129.5, 129.0, 128.5, 128.4, 126.9, 126.7, 120.7, 120.5, 101.5, 101.0, 65.0, 53.3(5), 53.3(0), 52.8, 52.7, 38.4, 38.3, 37.9(3), 37.9(0),

28.5, 28.3, 27.5, 21.2(4), 21.1(7), 19.4, 19.3. HRMS-ESI ( $m/z$ ): calcd for  $C_{22}H_{25}INO_3$  [ $M + H$ ] $^+$ : 478.0874, found 478.0869.

**(R)-2'-Iodo-6,6'-dimethyl-[1,1'-biphenyl]-2-yl 4-benzhydrylpiperazine-1-carboxylate (56)**

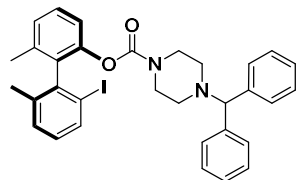

Eluent: 10:1 petroleum ether / ethyl acetate; white solid, 30.2 mg, 50% yield, 97% ee. mp: 143-145 °C. HPLC conditions: Chiralpak AS-H, isopropanol/hexanes = 3:97, flow: 0.5 mL/min,  $\lambda = 254$  nm,  $t_r = 12.523$  min (major), 15.127 min (minor).  $[\alpha]^{25}_D = -27.14$  (c 0.28,

$CH_2Cl_2$ ).  $^1H$  NMR (400 MHz,  $CDCl_3$ ):  $\delta$  7.72 (d,  $J = 8.0$  Hz, 1H), 7.38 – 7.34 (m, 5H), 7.32 – 7.27 (m, 4H), 7.22 – 7.15 (m, 5H), 6.92 (t,  $J = 7.6$  Hz, 1H), 4.14 (s, 1H), 3.44 – 3.32 (m, 2H), 3.14 (s, 2H), 2.33 (s, 1H), 2.14 – 2.09 (m, 2H), 2.03 (s, 3H), 1.99 (s, 3H), 1.80 (s, 1H).  $^{13}C\{^1H\}$  NMR (100 MHz,  $CDCl_3$ ):  $\delta$  152.6, 148.1, 142.2, 142.1, 141.3, 138.8, 137.0, 136.4, 136.3, 129.7, 129.1, 128.5(3), 128.5(0), 127.9, 127.8, 127.1, 126.9, 120.6, 101.1, 99.9, 75.9, 51.4, 51.3, 44.4, 44.0, 21.2, 19.3. HRMS-ESI ( $m/z$ ): calcd for  $C_{32}H_{32}IN_2O_2$  [ $M + H$ ] $^+$ : 603.1503, found 603.1497.

**(R)-2'-Iodo-6,6'-dimethyl-[1,1'-biphenyl]-2-yl 4-(bis(4-fluorophenyl)methyl)piperazine-1-carboxylate (57)**

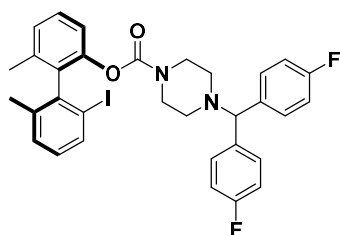

Eluent: 2:1 petroleum ether / ethyl acetate; white solid, 38.3 mg, 60% yield, 98% ee. mp: 162-165 °C. HPLC conditions: Chiralpak OD-H, isopropanol/hexanes = 5:95, flow: 0.5 mL/min,  $\lambda = 254$  nm,  $t_r = 18.596$  min (major), 19.822 min (minor).  $[\alpha]^{25}_D = -28.49$  (c 0.34,  $CH_2Cl_2$ ).  $^1H$  NMR (400 MHz,  $CDCl_3$ ):  $\delta$  7.72 (d,

$J = 7.6$  Hz, 1H), 7.36 – 7.28 (m, 5H), 7.21 (d,  $J = 7.6$  Hz, 1H), 7.18 – 7.15 (m, 2H), 6.98 (t,  $J = 8.4$  Hz, 4H), 6.91 (t,  $J = 7.6$  Hz, 1H), 4.12 (s, 1H), 3.37 (s, 2H), 3.13 (s, 2H), 2.29 (s, 2H), 2.12 – 2.05 (m, 2H), 2.02 (s, 3H), 1.99 (s, 3H), 1.79 – 1.75 (m, 1H).  $^{13}C\{^1H\}$  NMR (100 MHz,  $CDCl_3$ ):  $\delta$  161.8 (d,  $J = 244.0$  Hz), 152.6, 148.1, 141.4, 138.9, 137.7, 137.6, 137.1, 136.3(1), 136.2(9), 129.7, 129.2(1) (d,  $J = 7.7$  Hz), 129.2(0) (d,  $J = 2.6$  Hz), 129.0, 128.5, 126.9, 120.6, 115.5 (d,  $J = 21.0$  Hz), 101.1, 74.2, 51.2, 44.3, 31.6, 22.6, 21.2, 19.3.  $^{19}F$  NMR (376 MHz,  $CDCl_3$ ):  $\delta$  -115.27 (s). HRMS-ESI ( $m/z$ ): calcd for  $C_{32}H_{30}F_2IN_2O_2$  [ $M + H$ ] $^+$ : 639.1315, found 639.1309.



**(R)-2'-Iodo-6,6'-dimethyl-[1,1'-biphenyl]-2-yl**

**methyl(3-phenyl-3-(4-(trifluoromethyl)phenoxy)propyl)carbamate (58)**

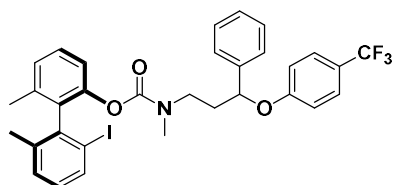

Eluent: 2:1 petroleum ether / ethyl acetate; light yellow oil,

51.4 mg, 78% yield, 97% ee. HPLC conditions: Chiralpak

AD-H, isopropanol/hexanes = 3:97, flow: 1.0 mL/min,  $\lambda$  =

254 nm,  $t_r$  = 13.629 min (major), 18.316 min (minor).  $[\alpha]^{25}_D$

= -20.64 (c 0.44, CH<sub>2</sub>Cl<sub>2</sub>). <sup>1</sup>H NMR (400 MHz, CDCl<sub>3</sub>):  $\delta$  7.74 – 7.52 (m, 1H), 7.43 (d,  $J$  = 8.8 Hz, 2H), 7.37 – 7.27 (m, 6H), 7.16 – 7.05 (m, 3H), 6.91 – 6.67 (m, 3H), 5.12 – 5.00 (m, 1H), 3.43 – 2.97 (m, 2H), 2.83 (d,  $J$  = 7.2 Hz, 1.6H), 2.53 (s, 1.4H), 2.05 – 1.98 (m, 7H), 1.90 – 1.68 (m, 1H). <sup>13</sup>C{<sup>1</sup>H} NMR (100 MHz, CDCl<sub>3</sub>):  $\delta$  160.2, 153.8, 148.2, 148.0, 141.4(2), 141.4(0), 138.7, 138.6, 137.1, 137.0, 136.3, 136.2, 128.7(9), 128.7(8), 128.7 (q,  $J$  = 48.0 Hz), 126.7 (q,  $J$  = 3.0 Hz), 125.9, 125.7 (d,  $J$  = 7.2 Hz), 123.0, 120.3 (d,  $J$  = 14.8 Hz), 115.7, 101.1, 78.2, 77.9, 46.3, 46.1, 36.6, 36.5, 35.3, 35.2, 21.3, 19.3(3), 19.3(2). <sup>19</sup>F NMR (376 MHz, CDCl<sub>3</sub>):  $\delta$  -61.53(s). HRMS-ESI ( $m/z$ ): calcd for C<sub>32</sub>H<sub>30</sub>F<sub>3</sub>INO<sub>3</sub> [M + H]<sup>+</sup>: 660.1217, found 660.1214.

**(R)-2'-Iodo-6,6'-dimethyl-[1,1'-biphenyl]-2-yl**

**4-(2-chlorodibenzo[*b,f*][1,4]oxazepin-11-yl)piperazine-1-carboxylate (59)**

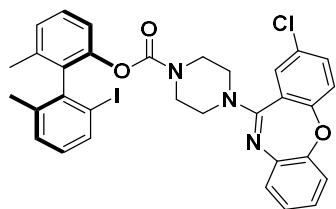

Eluent: 2:1 petroleum ether / ethyl acetate; light yellow oil, 60 mg,

90% yield, 97% ee. HPLC conditions: Chiralpak OD-H,

isopropanol/hexanes = 5:95, flow: 0.5 mL/min,  $\lambda$  = 254 nm,  $t_r$  =

30.385 min (major), 28.019 min (minor).  $[\alpha]^{25}_D$  = -18.50 (c 0.60,

CH<sub>2</sub>Cl<sub>2</sub>). <sup>1</sup>H NMR (400 MHz, CDCl<sub>3</sub>):  $\delta$  7.78 (d,  $J$  = 7.6 Hz, 1H), 7.43 – 7.34 (m, 2H), 7.25 – 7.23 (m, 2H), 7.21 – 7.18 (m, 3H), 7.16 – 7.08 (m, 3H), 7.04 – 6.96 (m, 2H), 3.54 – 2.82 (m, 8H), 2.06 (s, 3H), 2.01 (s, 3H). <sup>13</sup>C{<sup>1</sup>H} NMR (100 MHz, CDCl<sub>3</sub>):  $\delta$  159.3, 158.6, 152.8, 148.0, 141.3, 139.0, 137.2, 136.4(4), 136.3(9), 132.8, 130.4, 129.8, 129.3, 128.9, 128.6, 127.2, 127.1, 125.9, 125.0, 122.8, 120.6, 120.1, 101.1, 53.9, 53.3, 44.0, 43.6, 21.2, 19.3. HRMS-ESI ( $m/z$ ): calcd for C<sub>32</sub>H<sub>28</sub>ClIN<sub>3</sub>O<sub>3</sub> [M+H]<sup>+</sup>: 664.0858, found 664.0857.

**3-Ethyl 5-(2-((((*R*)-2'-iodo-6,6'-dimethyl-[1,1'-biphenyl]-2-yl)oxy)carbonyl)amino)ethyl 4-(2-chlorophenyl)-2-(methoxymethyl)-6-methyl-1,4-dihydropyridine-3,5-dicarboxylate (60)**

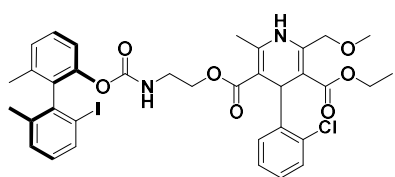

Eluent: 5:1 petroleum ether / ethyl acetate; light yellow oil, 65.2 mg, 86% yield, 97% ee. HPLC conditions: Chiralpak AD-H, isopropanol/hexanes = 5:95, flow: 1.0 mL/min,  $\lambda = 254$  nm,  $t_r = 49.505$  min (major), 43.524 min (minor).  $[\alpha]_D^{25} =$

-26.18 (c 0.64,  $\text{CH}_2\text{Cl}_2$ ).  $^1\text{H}$  NMR (400 MHz,  $\text{CDCl}_3$ ):  $\delta$  7.75 (t,  $J = 7.6$  Hz, 1H), 7.39 – 7.36 (m, 1H), 7.32 (t,  $J = 8.0$  Hz, 1H), 7.24 – 7.22 (m, 3H), 7.17 – 7.11 (m, 3H), 7.06 – 7.02 (m, 1H), 6.95 – 6.91 (m, 1H), 5.41 (s, 1H), 5.06 – 4.96 (m, 1H), 4.74 – 4.59 (m, 2H), 4.07 – 4.03 (m, 2H), 3.61 (s, 3H), 3.56 – 3.25 (m, 4H), 2.29 – 2.25 (m, 3H), 2.04 (s, 3H), 1.99 (s, 3H), 1.19 (t,  $J = 6.8$  Hz, 3H).  $^{13}\text{C}\{^1\text{H}\}$  NMR (100 MHz,  $\text{CDCl}_3$ ):  $\delta$  168.0, 167.1, 154.6, 147.7, 145.8, 145.1, 144.4, 141.0, 138.6(8), 138.6(6), 137.4, 136.3, 132.2, 131.3(8), 131.3(7), 129.7, 129.2, 129.1, 128.4, 127.3, 127.2, 126.8(3), 126.8(1), 120.2, 103.7, 101.3, 100.9, 70.6, 68.0, 59.7, 50.7, 40.7, 37.0, 21.1, 19.3, 19.2, 14.2. HRMS-ESI ( $m/z$ ): calcd for  $\text{C}_{35}\text{H}_{37}\text{ClIN}_2\text{O}_7$  [ $\text{M} + \text{H}$ ] $^+$ : 759.1328, found 759.1323.

**(*R*)-2'-Iodo-6,6'-dimethyl-[1,1'-biphenyl]-2-yl**

**((*S*)-4-oxo-4-(3-(trifluoromethyl)-5,6-dihydro-[1,2,4]triazolo[4,3-*a*]pyrazin-7(8*H*)-yl)-1-(2,4,5-trifluorophenyl)butan-2-yl)carbamate (61)**

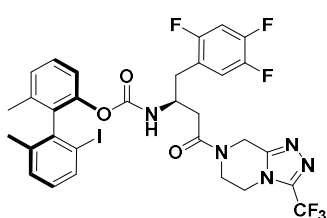

Eluent: 2:1 petroleum ether / ethyl acetate; light yellow oil, 68.9 mg, 91% yield, 98:2 dr. HPLC conditions: Chiralpak INC, isopropanol/hexanes = 15:85, flow: 1.0 mL/min,  $\lambda = 254$  nm,  $t_r = 36.126$  min (major), 30.073 min (minor).  $[\alpha]_D^{25} = -7.69$  (c 0.66,

$\text{CH}_2\text{Cl}_2$ ).  $^1\text{H}$  NMR (400 MHz,  $\text{CDCl}_3$ ):  $\delta$  7.68 – 7.62 (m, 1H), 7.29 (t,  $J = 7.6$  Hz, 1H), 7.20 – 7.14 (m, 2H), 6.99 – 6.79 (m, 4H), 5.70 – 5.46 (m, 1H), 5.05 – 4.78 (m, 2H), 4.17 – 4.14 (m, 2H), 4.10 – 3.98 (m, 2H), 3.93 – 3.82 (m, 1H), 2.91 – 2.29 (m, 4H), 2.00 (s, 3H), 1.94 (s, 3H), 1.19 (d,  $J = 6.4$  Hz, 2H).  $^{13}\text{C}\{^1\text{H}\}$  NMR (100 MHz,  $\text{CDCl}_3$ ):  $\delta$  169.4, 169.1, 155.9 (dd,  $J = 243.5, 9.8$  Hz), 153.4(d,  $J = 13.6$  Hz), 150.3, 149.6, 147.4 (q,  $J = 14.1$  Hz), 145.1 (d,  $J = 10.3$  Hz), 144.0-142.5 (m), 140.8 (t,  $J = 12.4$  Hz), 138.5, 138.3, 137.2, 136.1, 136.0, 129.4, 128.8, 128.2, 127.0, 121.1 (d,  $J = 19.5$  Hz), 119.9, 119.2, 118.8 (d,  $J = 14.5$  Hz), 118.0 (q,  $J = 270$  Hz), 105.1 (t,  $J = 21.7$  Hz), 100.5, 64.0, 63.8, 48.7, 48.5, 42.5, 43.0, 42.1, 41.4, 38.8, 37.7, 36.3, 32.3, 32.2, 25.0, 20.9, 19.1.

$^{19}\text{F}$  NMR (376 MHz,  $\text{CDCl}_3$ ):  $\delta$  -62.95 (d,  $J = 52.9$  Hz, 3F), -119.13 – -119.96 (m, 1F), -134.78 – -135.36 (m, 1F), -142.01 – -142.56 (m, 1F). HRMS-ESI ( $m/z$ ): calcd for  $\text{C}_{31}\text{H}_{26}\text{FIN}_5\text{O}_3$  [ $\text{M} + \text{e}$ ]: 757.0985, found 757.0983.

**(R)-2'-Iodo-3',6-dimethyl-[1,1'-biphenyl]-2-yl diethylcarbamate (62)**

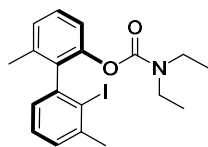

Eluent: 20:1 petroleum ether / ethyl acetate; light yellow oil, 21.1 mg, 50% yield, 84% ee. HPLC conditions: Chiralpak OD-H, isopropanol/hexanes = 2:98, flow: 1.0 mL/min,  $\lambda = 254$  nm,  $t_r = 8.410$  min (major), 7.441 min (minor).  $[\alpha]_D^{25} = -68.03$  (c 0.12,  $\text{CH}_2\text{Cl}_2$ ).  $^1\text{H}$  NMR (400 MHz,  $\text{CDCl}_3$ ):  $\delta$  7.32 (t,  $J = 8.0$  Hz, 1H), 7.24 (t,  $J = 7.6$  Hz, 1H), 7.19 – 7.17 (m, 1H), 7.13 (d,  $J = 7.6$  Hz, 2H), 7.00 – 6.98 (m, 1H), 3.19 – 3.02 (m, 3H), 2.89 – 2.80 (m, 1H), 2.51 (s, 3H), 2.01 (s, 3H), 0.99 (t,  $J = 7.2$  Hz, 3H), 0.69 (t,  $J = 6.8$  Hz, 3H).  $^{13}\text{C}\{^1\text{H}\}$  NMR (100 MHz,  $\text{CDCl}_3$ ):  $\delta$  153.6, 148.6, 143.2, 142.0, 138.2, 137.4, 128.3, 128.2, 127.8, 127.5, 126.7, 120.1, 107.3, 41.9, 41.5, 29.5, 19.9, 13.3, 13.2. HRMS-ESI ( $m/z$ ): calcd for  $\text{C}_{19}\text{H}_{23}\text{INO}_2$  [ $\text{M} + \text{H}$ ] $^+$ : 424.0768, found 424.0768.

**(R)-3'-Chloro-2'-iodo-6,6'-dimethyl-[1,1'-biphenyl]-2-yl diethylcarbamate (63)**

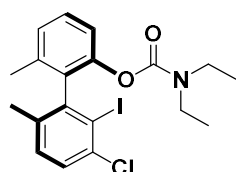

Eluent: 20:1 petroleum ether / ethyl acetate; light yellow oil, 39.7 mg, 87% yield, 96% ee. HPLC conditions: Chiralpak AD-H, isopropanol/hexanes = 1:99, flow: 0.6 mL/min,  $\lambda = 254$  nm,  $t_r = 15.102$  min (major), 18.584 min (minor).  $[\alpha]_D^{25} = -89.09$  (c 0.22,  $\text{CH}_2\text{Cl}_2$ ).  $^1\text{H}$  NMR (400 MHz,  $\text{CDCl}_3$ ):  $\delta$  7.34 (t,  $J = 7.6$  Hz, 2H), 7.22 (d,  $J = 7.6$  Hz, 1H), 7.16 (t,  $J = 8.8$  Hz, 2H), 3.19 (q,  $J = 7.2$  Hz, 2H), 3.06 – 2.99 (m, 1H), 2.91 – 2.84 (m, 1H), 2.02 (s, 3H), 1.98 (s, 3H), 1.02 (t,  $J = 7.2$  Hz, 3H), 0.73 (t,  $J = 7.2$  Hz, 3H).  $^{13}\text{C}\{^1\text{H}\}$  NMR (100 MHz,  $\text{CDCl}_3$ ):  $\delta$  153.1, 148.0, 144.4, 136.7, 136.5(9), 136.5(6), 136.3, 130.8, 128.6, 127.8, 126.6, 120.4, 105.2, 41.9, 41.5, 20.8, 19.2, 13.4, 13.2. HRMS-ESI ( $m/z$ ): calcd for  $\text{C}_{19}\text{H}_{22}\text{ClINO}_2$  [ $\text{M} + \text{H}$ ] $^+$ : 458.0378, found 458.0377.

**(R)-3'-chloro-2'-iodo-6,6'-dimethyl-[1,1'-biphenyl]-2-yl thiomorpholine-4-carboxylate (64)**

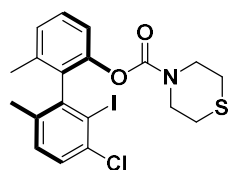

Eluent: 20:1 petroleum ether / ethyl acetate; white solid, 39.0 mg, 80% yield, 77% ee. HPLC conditions: Chiralpak INC, isopropanol/hexanes = 5:95, flow: 1.0 mL/min,  $\lambda = 254$  nm,  $t_r = 7.058$  min (major), 7.569 min (minor).  $[\alpha]_D^{25} = -70.28$  (c 0.35,  $\text{CH}_2\text{Cl}_2$ ).  $^1\text{H}$  NMR (400 MHz,  $\text{CDCl}_3$ ):  $\delta$  7.37 (q,  $J =$

8.0 Hz, 2H), 7.23 – 7.15 (m, 3H), 3.80 – 3.27 (m, 4H), 2.48 – 2.14 (m, 3H), 2.03 (s, 3H), 1.99 (s, 3H), 1.92 – 1.83 (m, 1H).  $^{13}\text{C}\{^1\text{H}\}$  NMR (100 MHz,  $\text{CDCl}_3$ ):  $\delta$  152.4, 147.7, 144.2, 136.9, 136.8, 136.8, 136.5, 130.8, 128.9, 128.1, 127.2, 120.6, 105.3, 47.1, 46.5, 27.1, 26.8, 20.8, 19.2. HRMS (ESI) calcd for  $\text{C}_{19}\text{H}_{20}\text{ClINO}_2\text{S}$   $[\text{M}+\text{H}]^+$ : 487.9942, found 487.9944.

**Ethyl (*R*)-*N*-benzyl-*N*-(((3'-chloro-2'-iodo-6,6'-dimethyl-[1,1'-biphenyl]-2-yl)oxy)carbonyl)glycinate (65)**

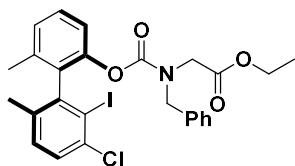

Eluent: 10:1 petroleum ether / ethyl acetate; light yellow oil, 41.6 mg,

72% yield, >99% ee. HPLC conditions: Chiralpak AD-H, isopropanol/hexanes = 5:95, flow: 0.8 mL/min,  $\lambda$  = 254 nm,  $t_r$  = 16.126 min (major), 17.411 min (minor).  $[\alpha]_D^{25} = -70.82$  (c 0.38,

$\text{CH}_2\text{Cl}_2$ ).  $^1\text{H}$  NMR (400 MHz,  $\text{CDCl}_3$ ):  $\delta$  7.39 – 7.27 (m, 4H), 7.25 – 7.24 (m, 2H), 7.19 – 7.16 (m, 2H), 7.09 – 7.06 (m, 1H), 6.84 – 6.82 (m, 1H), 4.50 (s, 1H), 4.20 – 4.18 (m, 1H), 4.15 – 4.08 (m, 2H), 3.87 – 3.78 (m, 1H), 3.46 (s, 1H), 2.02 (s, 3H), 1.98 (s, 3H), 1.23 (td,  $J$  = 7.2, 2.0 Hz, 1H).  $^{13}\text{C}\{^1\text{H}\}$  NMR (100 MHz,  $\text{CDCl}_3$ ):  $\delta$  169.0, 168.8, 154.0, 153.9, 147.8, 147.7, 144.1, 136.9, 136.8(2), 136.7(7), 136.6(3), 136.5(9), 136.5(0), 136.4(7), 136.4, 136.3, 136.1, 130.9(4), 130.8(7), 128.8, 128.7, 128.6(1), 128.5(9), 128.1, 128.0, 127.8, 127.6(2), 127.5(7), 127.2, 127.1, 120.5, 120.3, 105.0, 104.8, 61.2, 61.1, 51.4, 51.3, 47.6, 47.2, 20.9, 20.8, 19.3, 19.2, 14.2, 14.1. HRMS-ESI ( $m/z$ ): calcd for  $\text{C}_{26}\text{H}_{26}\text{ClINO}_4$   $[\text{M} + \text{H}]^+$ : 578.0590, found 578.0588.

**(*R*)-2'-Iodo-3',6,6'-trimethyl-[1,1'-biphenyl]-2-yl diethylcarbamate (66)**

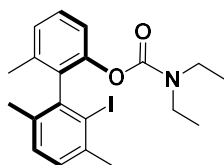

Eluent: 20:1 petroleum ether / ethyl acetate; light yellow oil, 31.5 mg, 72% yield, 98% ee. HPLC conditions: Chiralpak OD-H, isopropanol/hexanes = 1:99, flow: 0.8 mL/min,  $\lambda$  = 254 nm,  $t_r$  = 9.432 min (major), 10.782 min (minor).  $[\alpha]_D^{25} = -58.05$  (c 0.27,  $\text{CH}_2\text{Cl}_2$ ).  $^1\text{H}$  NMR (400 MHz,  $\text{CDCl}_3$ ):  $\delta$

7.33 (t,  $J$  = 8.0 Hz, 1H), 7.22 (d,  $J$  = 8.4 Hz, 1H), 7.14 (d,  $J$  = 7.6 Hz, 1H), 7.10 (s, 2H), 3.20 – 3.15 (m, 2H), 3.01 – 2.78 (m, 2H), 2.46 (s, 3H), 2.00 (s, 3H), 1.97 (s, 3H), 1.01 (t,  $J$  = 7.2 Hz, 3H), 0.67 (t,  $J$  = 7.2 Hz, 3H).  $^{13}\text{C}\{^1\text{H}\}$  NMR (100 MHz,  $\text{CDCl}_3$ ):  $\delta$  153.3, 148.3, 142.1, 139.4, 137.2, 136.9, 135.4, 129.5, 128.4, 128.2, 126.5, 120.3, 108.0, 41.9, 41.5, 29.4, 20.9, 19.4, 13.3, 13.2. HRMS-ESI ( $m/z$ ): calcd for  $\text{C}_{20}\text{H}_{25}\text{INO}_2$   $[\text{M}+\text{H}]^+$ : 438.0924, found 438.0924.

**Tert-butyl (*R*)-*N*-(((2'-iodo-3',6,6'-trimethyl-[1,1'-biphenyl]-2-yl)oxy)carbonyl)-*N*-methylglycinate (67)**

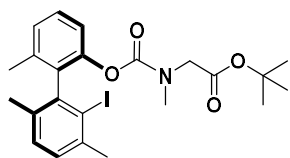

Eluent: 10:1 petroleum ether / ethyl acetate; light yellow oil, 42.2 mg, 83% yield, 98% ee. HPLC conditions: Chiralpak INC, isopropanol/hexanes = 5:95, flow: 1.0 mL/min,  $\lambda = 254$  nm,  $t_r = 12.261$  min (major), 11.263 min (minor).  $[\alpha]_D^{25} = -53.55$  (c 0.42,  $\text{CH}_2\text{Cl}_2$ ).  $^1\text{H}$

NMR (400 MHz,  $\text{CDCl}_3$ ):  $\delta$  7.33 (t,  $J = 8.0$  Hz, 1H), 7.25 – 7.22 (m, 1H), 7.16 – 7.10 (m, 3H), 3.84 – 3.72 (m, 1H), 3.47 – 3.25 (m, 1H), 2.88 (s, 1.5H), 2.55 (s, 1.5H), 2.48 (s, 3H), 1.98 – 1.96 (m, 6H), 1.43 (d,  $J = 3.6$  Hz, 9H).  $^{13}\text{C}\{^1\text{H}\}$  NMR (100 MHz,  $\text{CDCl}_3$ ):  $\delta$  168.2, 168.1, 154.3, 153.7, 148.1, 148.0, 141.9, 141.8, 139.4, 139.3, 137.1, 137.0(4), 136.9(7), 136.9, 135.3(4), 135.2(7), 129.5(4), 129.4(9), 128.5, 128.4, 128.3, 128.2, 126.8, 126.7, 120.2, 120.0, 107.8, 107.7, 99.9, 99.7, 81.7, 81.6, 51.4, 51.1, 35.9, 35.1, 29.4, 28.1, 28.0, 20.9(2), 20.8(9), 19.4, 19.3. HRMS-ESI ( $m/z$ ): calcd for  $\text{C}_{23}\text{H}_{29}\text{INO}_4$   $[\text{M}+\text{H}]^+$  510.1136, found 510.1130.

**(*R*)-2'-Iodo-3',6,6'-trimethyl-[1,1'-biphenyl]-2-yl morpholine-4-carboxylate (68)**

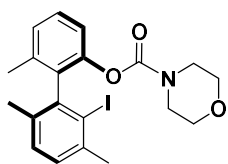

Eluent: 20:1 petroleum ether / ethyl acetate; light yellow oil ( 34.7 mg, 77%, 94% ee). HPLC conditions: Chiralpak AD-H , isopropanol/hexanes = 3:97, flow: 0.5 mL/min,  $\lambda = 254$  nm,  $t_r = 20.669$  min (major), 19.224 min (minor).  $[\alpha]_D^{25} = -58.26$  (c 0.32,  $\text{CH}_2\text{Cl}_2$ ).  $^1\text{H}$  NMR (400 MHz,  $\text{CDCl}_3$ ):  $\delta$

7.35 (d,  $J = 7.6$  Hz, 1H), 7.19 – 7.12 (m, 4H), 3.56 (s, 1H), 3.40 – 3.33 (m, 4H), 3.06 (s, 3H), 2.47 (s, 3H), 2.01 (s, 3H), 1.98 (s, 3H).  $^{13}\text{C}\{^1\text{H}\}$  NMR (100 MHz,  $\text{CDCl}_3$ ):  $\delta$  152.6, 148.0, 141.8, 139.5, 137.4, 137.1, 135.7, 129.5, 128.6, 128.4, 127.1, 120.5, 107.8, 66.6, 66.2, 44.7, 44.0, 29.4, 20.8, 19.3. HRMS-ESI ( $m/z$ ): calcd for  $\text{C}_{20}\text{H}_{23}\text{INO}_3$   $[\text{M}+\text{H}]^+$ : 452.0717, found 452.0712.

**(*R*)-2'-Iodo-3',6'-dimethyl-6-(trifluoromethyl)-[1,1'-biphenyl]-2-yl diethylcarbamate (69)**

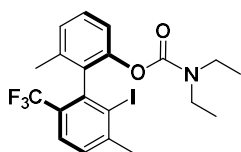

Eluent: 20:1 petroleum ether / ethyl acetate; light yellow oil, 32.9 mg, 67% yield, 92% ee. HPLC conditions: Chiralpak AD-H, isopropanol/hexanes = 2:98, flow: 1.0 mL/min,  $\lambda = 254$  nm,  $t_r = 5.573$  min

(major), 6.438 min (minor).  $[\alpha]_D^{25} = -78.03$  (c 0.31,  $\text{CH}_2\text{Cl}_2$ ).  $^1\text{H}$  NMR (400 MHz,  $\text{CDCl}_3$ ):  $\delta$  7.65 – 7.62 (m, 2H), 7.57 – 7.53 (m, 1H), 7.12 (q,  $J = 7.6$  Hz, 2H), 3.20 (q,  $J = 7.2$  Hz, 2H), 2.97 – 2.88 (m, 1H), 2.80 – 2.71 (m, 1H), 2.46 (s, 3H), 1.99 (s, 3H), 1.04 (t,  $J = 7.2$  Hz, 3H), 0.66 (t,  $J = 7.2$  Hz, 3H).  $^{13}\text{C}\{^1\text{H}\}$  NMR (100 MHz,  $\text{CDCl}_3$ ):  $\delta$  152.6, 149.1, 139.5, 139.1, 136.0 (q,  $J = 2.0$  Hz),

129.3, 129.2 (q,  $J = 29.7$  Hz), 129.0, 128.8, 126.9, 123.3 (q,  $J = 273.0$  Hz), 122.9 (q,  $J = 5.0$  Hz), 107.9(3), 107.9(2), 42.0, 41.5, 29.3, 21.1, 13.2, 13.1.  $^{19}\text{F}$  NMR (376 MHz,  $\text{CDCl}_3$ ):  $\delta$  -60.43 (s). HRMS-ESI ( $m/z$ ): calcd for  $\text{C}_{20}\text{H}_{22}\text{F}_3\text{INO}_2$  [ $\text{M} + \text{H}$ ] $^+$ : 492.0642, found 492.0643.

**(*R*)-2'-Iodo-3',6'-dimethyl-6-(trifluoromethyl)-[1,1'-biphenyl]-2-yl diallylcarbamate (70)**

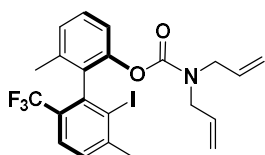

Eluent: 20:1 petroleum ether / ethyl acetate; light yellow oil, 38.1 mg, 74% yield, 90% ee. HPLC conditions: Chiralpak AD-H, isopropanol/hexanes = 3:97, flow: 1.0 mL/min,  $\lambda = 254$  nm,  $t_r = 5.134$  min (major), 5.696 min (minor).  $[\alpha]^{25}_D = -92.18$  (c 0.36,  $\text{CH}_2\text{Cl}_2$ ).  $^1\text{H}$

NMR (400 MHz,  $\text{CDCl}_3$ ):  $\delta$  7.66 – 7.62 (m, 2H), 7.56 (t,  $J = 8.0$  Hz, 1H), 7.13 (q,  $J = 7.6$  Hz, 2H), 5.72 – 5.62 (m, 1H), 5.23 – 5.15 (m, 1H), 5.14 – 5.02 (m, 2H), 4.93 – 4.88 (m, 2H), 3.84 – 3.72 (m, 2H), 3.47 – 3.28 (m, 2H), 2.46 (s, 3H), 1.99 (s, 3H).  $^{13}\text{C}\{^1\text{H}\}$  NMR (100 MHz,  $\text{CDCl}_3$ ):  $\delta$  152.9, 149.0, 139.3, 139.2, 136.0 (q,  $J = 2.0$  Hz), 135.9, 132.6 (d,  $J = 1.1$  Hz), 129.4, 129.2 (q,  $J = 30.0$  Hz), 129.0, 128.8, 127.0, 123.3 (q,  $J = 273.0$  Hz), 123.2 (q,  $J = 5.1$  Hz), 117.2, 116.7, 107.9, 49.0, 48.6, 29.3, 21.1.  $^{19}\text{F}$  NMR (376 MHz,  $\text{CDCl}_3$ ):  $\delta$  -60.45 (s). HRMS-ESI ( $m/z$ ): calcd for  $\text{C}_{22}\text{H}_{22}\text{F}_3\text{INO}_2$  [ $\text{M} + \text{H}$ ] $^+$ : 516.0642, found 516.0643.

**(*R*)-2'-Iodo-3',4',6,6'-tetramethyl-[1,1'-biphenyl]-2-yl diethylcarbamate (71)**

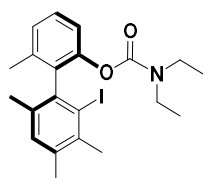

Eluent: 20:1 petroleum ether / ethyl acetate; light yellow oil, 28.4 mg, 63% yield, 96% ee. HPLC conditions: Chiralpak OD-H, isopropanol/hexanes = 1:99, flow: 0.5 mL/min,  $\lambda = 254$  nm,  $t_r = 17.236$  min (major), 20.386 min (minor).  $[\alpha]^{25}_D = -50.19$  (c 0.26,  $\text{CH}_2\text{Cl}_2$ ).  $^1\text{H}$  NMR (400 MHz,  $\text{CDCl}_3$ ):  $\delta$

7.31 (d,  $J = 8.0$  Hz, 1H), 7.21 (d,  $J = 8.0$  Hz, 1H), 7.12 (d,  $J = 7.6$  Hz, 1H), 6.99 (s, 1H), 3.17 (q,  $J = 6.8$  Hz, 2H), 3.01 – 2.80 (m, 2H), 2.46 (s, 3H), 2.35 (s, 3H), 1.98 (s, 3H), 1.97 (s, 3H), 1.01 (t,  $J = 7.2$  Hz, 3H), 0.66 (t,  $J = 6.8$  Hz, 3H).  $^{13}\text{C}\{^1\text{H}\}$  NMR (100 MHz,  $\text{CDCl}_3$ ):  $\delta$  153.3, 148.4, 139.9, 137.7, 137.3, 137.1, 135.8, 135.2, 131.5, 128.1, 126.4, 120.3, 109.5, 41.8, 41.4, 26.1, 21.7, 20.8, 19.4, 13.2. HRMS-ESI ( $m/z$ ): calcd for  $\text{C}_{21}\text{H}_{27}\text{INO}_2$  [ $\text{M} + \text{H}$ ] $^+$ : 452.1081, found 452.1082.

**Ethyl (*R*)-*N*-benzyl-*N*-(((2'-iodo-3',4',6,6'-tetramethyl-[1,1'-biphenyl]-2-yl)oxy)carbonyl) glycinate (72)**

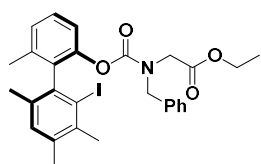

Eluent: 10:1 petroleum ether / ethyl acetate; light yellow oil, 39.9 mg, 70% yield, 95% ee. HPLC conditions: Chiralpak INC, isopropanol/hexanes = 10:90, flow: 1.0 mL/min,  $\lambda = 254$  nm,  $t_r = 13.034$

min (major), 12.059 min (minor).  $[\alpha]_D^{25} = -64.58$  (c 0.37,  $\text{CH}_2\text{Cl}_2$ ).  $^1\text{H NMR}$  (400 MHz,  $\text{CDCl}_3$ ):  $\delta$  7.34 (d,  $J = 8.0$  Hz, 1H), 7.29 – 7.27 (m, 2H), 7.25 – 7.20 (m, 1H), 7.18 – 7.14 (m, 2H), 7.05 – 7.01 (m, 2H), 6.75 (t,  $J = 7.2$  Hz, 1H), 4.63 – 4.47 (m, 1H), 4.40 – 4.11 (m, 1H), 4.13 – 4.06 (m, 2H), 3.92 – 3.69 (m, 2H), 3.46 – 3.23 (m, 2H), 2.45 (s, 3H), 2.35 (s, 3H), 1.98 (s, 3H), 1.96 (s, 3H), 1.22 (t,  $J = 7.2$  Hz, 3H).  $^{13}\text{C}\{^1\text{H}\}$  NMR (100 MHz,  $\text{CDCl}_3$ ):  $\delta$  169.2, 169.1, 154.1, 154.0, 148.1(2), 148.0(8), 139.6, 137.5, 137.4, 136.5, 136.3, 136.0, 135.2, 135.1, 131.7, 131.6, 128.5, 128.4, 128.3, 128.2, 127.8(4), 127.7(6), 127.5, 127.3, 127.0, 126.8, 120.4, 120.0, 109.2(3), 109.1(6), 61.1, 61.0, 51.2, 51.1, 47.3, 47.1, 26.1(5), 26.1(1), 21.9, 21.8, 20.8(5), 20.7(7), 19.5, 19.4, 14.2, 14.1. HRMS-ESI ( $m/z$ ): calcd for  $\text{C}_{28}\text{H}_{31}\text{INO}_4$   $[\text{M} + \text{H}]^+$ : 572.1292, found 572.1290.

**(R)-2'-Iodo-3',4',6,6'-tetramethyl-[1,1'-biphenyl]-2-yl dibenzylcarbamate (73)**

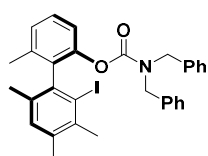

Eluent: 20:1 petroleum ether / ethyl acetate; light yellow oil, 46 mg, 80% yield, 99% ee. HPLC conditions: Chiralpak AD-H, isopropanol/hexanes = 2:98, flow: 1.0 mL/min,  $\lambda = 254$  nm,  $t_r = 6.956$  min (major), 6.570 min (minor).  $[\alpha]_D^{25} = -73.30$  (c 0.43,  $\text{CH}_2\text{Cl}_2$ ).  $^1\text{H NMR}$  (400 MHz,  $\text{CDCl}_3$ ):  $\delta$  7.37 (d,  $J = 8.0$  Hz, 1H), 7.34 – 7.27 (m, 4H), 7.24 (d,  $J = 8.4$  Hz, 3H), 7.19 (d,  $J = 7.6$  Hz, 1H), 7.11 (d,  $J = 6.4$  Hz, 2H), 7.01 (s, 1H), 6.90 (d,  $J = 7.6$  Hz, 2H), 4.34 (q,  $J = 15.6$  Hz, 2H), 4.07 (q,  $J = 15.6$  Hz, 2H), 2.38 (s, 3H), 2.37 (s, 3H), 2.01 (s, 3H), 1.99 (s, 3H).  $^{13}\text{C}\{^1\text{H}\}$  NMR (100 MHz,  $\text{CDCl}_3$ ):  $\delta$  154.4, 148.3, 139.6, 137.8, 137.5, 137.4, 137.0, 136.9, 135.9, 135.2, 131.7, 128.5, 128.4, 128.2, 128.0, 127.7, 127.3, 127.2, 126.9, 120.3, 109.3, 48.9, 48.8, 26.1, 21.9, 20.9, 19.4. HRMS-ESI ( $m/z$ ): calcd for  $\text{C}_{31}\text{H}_{31}\text{INO}_2$   $[\text{M} + \text{H}]^+$ : 576.1394, found 576.1393.

**(R)-N,N-Diethyl-2'-hydroxy-6,6'-dimethyl-[1,1'-biphenyl]-2-carboxamide (74)**

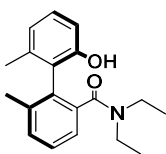

Eluent: 10:1 petroleum ether / ethyl acetate; white solid, 23.8 mg, 80% yield, 99% ee. mp: 133-134 °C. HPLC conditions: Chiralpak AD-H, isopropanol/hexanes = 10:90, flow: 1.0 mL/min,  $\lambda = 254$  nm,  $t_r = 9.252$  min (major), 8.695 min (minor).  $[\alpha]_D^{25} = -114.46$  (c 0.16,  $\text{CH}_2\text{Cl}_2$ ).  $^1\text{H NMR}$  (400 MHz,  $\text{DMSO}-d_6$ ):  $\delta$  9.09 (s, 1H), 7.28 – 7.24 (m, 2H), 7.07 (d,  $J = 5.6$  Hz, 1H), 6.99 (t,  $J = 8.0$  Hz, 1H), 6.68 – 6.62 (m, 2H), 3.52 – 3.48 (m, 1H), 3.34 – 3.31 (m, 1H), 2.81 – 2.72 (m, 2H), 1.94 (s, 3H), 1.89 (s, 3H), 0.91 (t,  $J = 6.4$  Hz, 3H), 0.54 (t,  $J = 6.8$  Hz, 3H).  $^{13}\text{C}\{^1\text{H}\}$  NMR (100 MHz,  $\text{DMSO}-d_6$ ):  $\delta$  169.6,

154.8, 138.7, 138.3, 137.4, 134.9, 129.6, 128.4, 127.3, 125.3, 123.2, 120.7, 112.6, 42.3, 20.6, 19.9, 14.2, 12.1. HRMS-ESI ( $m/z$ ): calcd for  $C_{19}H_{24}NO_2$   $[M+H]^+$ : 298.1802, found 298.1797.

**(R)-2'-Hydroxy-6,6'-dimethyl-N,N-dipropyl-[1,1'-biphenyl]-2-carboxamide (75)**

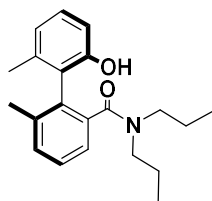

Eluent: 10:1 petroleum ether / ethyl acetate; white solid, 24.3 mg, 84% yield, 97% ee. mp: 159-161 °C. HPLC conditions: Chiralpak INC, isopropanol/hexanes = 10:90, flow: 1.0 mL/min,  $\lambda = 254$  nm,  $t_r = 12.171$  min (major), 15.813 min (minor).  $[\alpha]_D^{25} = -99.25$  (c 0.27,  $CH_2Cl_2$ ).  $^1H$  NMR (400 MHz, DMSO- $d_6$ ):  $\delta$  9.12 (s, 1H), 7.28 – 7.24 (m, 2H), 7.04 (d,  $J = 5.6$  Hz, 1H), 6.98 (t,  $J = 8.0$  Hz, 1H), 6.67 (d,  $J = 8.0$  Hz, 1H), 6.62 (d,  $J = 7.6$  Hz, 1H), 3.54 – 3.48 (m, 1H), 3.31 – 3.26 (m, 1H), 2.69 – 2.60 (m, 2H), 1.93 (s, 3H), 1.88 (s, 3H), 1.47 – 1.26 (m, 2H), 1.09 – 0.88 (m, 2H), 0.65 (t,  $J = 7.2$  Hz, 3H), 0.51 (t,  $J = 7.6$  Hz, 3H).  $^{13}C\{^1H\}$  NMR (100 MHz, DMSO- $d_6$ ):  $\delta$  170.2, 154.8, 138.7, 138.4, 137.3, 134.8, 129.6, 128.4, 127.2, 125.4, 123.7, 120.7, 112.7, 49.7, 44.8, 21.5, 20.7, 20.0, 19.8, 11.5, 11.4. HRMS-ESI ( $m/z$ ): calcd for  $C_{21}H_{28}NO_2$   $[M+H]^+$  326.2115, found 326.2107.

**(R)-N,N-Dibutyl-2'-hydroxy-6,6'-dimethyl-[1,1'-biphenyl]-2-carboxamide (76)**

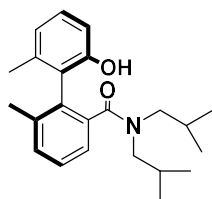

Eluent: 10:1 petroleum ether / ethyl acetate; white solid, 18.7 mg, 53% yield, >99% ee. mp: 197-199 °C. HPLC conditions: Chiralpak INC, isopropanol/hexanes = 10:90, flow: 1.0 mL/min,  $\lambda = 254$  nm,  $t_r = 7.888$  min (major), 13.372 min (minor).  $[\alpha]_D^{25} = -92.61$  (c 0.18,  $CH_2Cl_2$ ).  $^1H$  NMR (400 MHz, DMSO- $d_6$ ):  $\delta$  9.18 (s, 1H), 7.26 (d,  $J = 4.4$  Hz, 2H), 7.03 – 6.96 (m, 2H), 6.69 (d,  $J = 8.0$  Hz, 1H), 6.62 (d,  $J = 7.2$  Hz, 1H), 3.62 (dd,  $J = 13.2, 7.6$  Hz, 1H), 3.24 (dd,  $J = 14.4, 10.4$  Hz, 1H), 2.60 (dd,  $J = 14.8, 5.2$  Hz, 1H), 2.40 (dd,  $J = 13.2, 7.2$  Hz, 1H), 1.91 (s, 3H), 1.87 (s, 3H), 1.81 – 1.72 (m, 1H), 1.56 – 1.46 (m, 1H), 0.71 (d,  $J = 6.8$  Hz, 3H), 0.66 (d,  $J = 6.8$  Hz, 3H), 0.52 (d,  $J = 6.4$  Hz, 3H), 0.35 (d,  $J = 6.8$  Hz, 3H).  $^{13}C\{^1H\}$  NMR (100 MHz, DMSO- $d_6$ ):  $\delta$  171.1, 154.7, 138.5, 137.2, 134.6, 129.6, 128.6, 127.1, 125.5, 125.2, 121.0, 113.0, 55.4, 50.4, 26.3, 25.9, 20.8, 20.6(4), 20.5(7), 20.0(4), 20.0(2), 19.9. HRMS-ESI ( $m/z$ ): calcd for  $C_{23}H_{32}NO_2$   $[M + H]^+$ : 354.2428, found 354.2426.



**(R)-N,N-Dibenzyl-2'-hydroxy-6,6'-dimethyl-[1,1'-biphenyl]-2-carboxamide (77)**

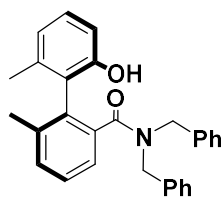

Eluent: 2:1 petroleum ether / ethyl acetate; white solid, 24.0 mg, 57% yield, 98% ee. mp: 138-139 °C. HPLC conditions: Chiralpak INC, isopropanol/hexanes = 10:90, flow: 0.8 mL/min,  $\lambda = 254$  nm,  $t_r = 22.905$  min (major), 21.151 min (minor).  $[\alpha]_D^{25} = -144.40$  (c 0.23,  $\text{CH}_2\text{Cl}_2$ ).  $^1\text{H}$  NMR (400 MHz,  $\text{DMSO-}d_6$ ):  $\delta$  9.29 (s, 1H), 7.37 – 7.24 (m, 7H), 7.16 – 7.08 (m, 5H), 6.80 (dd,  $J = 13.6, 7.2$  Hz, 2H), 6.40 (d,  $J = 7.2$  Hz, 2H), 5.26 (d,  $J = 15.6$  Hz, 1H), 4.80 (d,  $J = 16.6$  Hz, 1H), 3.66 (d,  $J = 16.8$  Hz, 1H), 3.50 (d,  $J = 15.6$  Hz, 1H), 2.00 (s, 3H), 1.96 (s, 3H).  $^{13}\text{C}\{^1\text{H}\}$  NMR (100 MHz,  $\text{DMSO-}d_6$ ):  $\delta$  171.4, 154.9, 138.8, 137.7, 137.4, 137.1, 136.8, 134.9, 130.1, 129.2, 128.9, 127.9, 127.6, 127.3(3), 127.3(0), 127.1, 125.4, 124.0, 121.3, 113.3, 51.0, 45.7, 20.7, 20.0. HRMS-ESI ( $m/z$ ): calcd for  $\text{C}_{29}\text{H}_{28}\text{NO}_2$   $[\text{M} + \text{H}]^+$ : 422.2115, found 422.2106.

**(R)-2'-Hydroxy-N,6,6'-trimethyl-N-propyl-[1,1'-biphenyl]-2-carboxamide (78)**

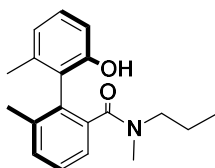

Eluent: 2:1 petroleum ether / ethyl acetate; white solid, 21.7 mg, 73% yield, 98% ee. mp: 122-123 °C. HPLC conditions: Chiralpak INC, isopropanol/hexanes = 10:90, flow: 1 mL/min,  $\lambda = 254$  nm,  $t_r = 6.942$  min (major), 10.591 min (minor).  $[\alpha]_D^{25} = -88.63$  (c 0.21,  $\text{CH}_2\text{Cl}_2$ ).  $^1\text{H}$  NMR (400 MHz,  $\text{DMSO-}d_6$ ):  $\delta$  9.09 (s, 1H), 7.29 – 7.25 (m, 2H), 7.05 – 6.97 (m, 2H), 6.70 – 6.63 (m, 2H), 3.28 – 3.25 (m, 1H), 2.82 – 2.80 (m, 1H), 2.71 (s, 3H), 1.94 (s, 3H), 1.90 (s, 3H), 1.42 – 1.08 (m, 2H), 0.70 – 0.54 (m, 3H).  $^{13}\text{C}\{^1\text{H}\}$  NMR (100 MHz,  $\text{DMSO-}d_6$ ):  $\delta$  170.5, 170.2, 154.7, 154.6, 138.6, 138.4, 137.5, 137.4, 135.0, 134.9, 129.8, 128.5, 128.4, 127.4, 127.2, 125.6, 124.0, 123.7, 120.8, 112.9, 112.8, 52.2, 47.8, 36.9, 31.8, 21.3, 20.6, 20.0, 19.8, 11.4, 11.2. HRMS-ESI ( $m/z$ ): calcd for  $\text{C}_{19}\text{H}_{24}\text{NO}_2$   $[\text{M} + \text{H}]^+$ : 298.1802, found 298.1797.

**(R)-N-Ethyl-2'-hydroxy-6,6'-dimethyl-N-propyl-[1,1'-biphenyl]-2-carboxamide (79)**

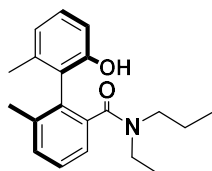

Eluent: 5:1 petroleum ether / ethyl acetate; white solid, 23.9 mg, 77% yield, 98% ee. mp: 140-142 °C. HPLC conditions: Chiralpak INC, isopropanol/hexanes = 10:90, flow: 1 mL/min,  $\lambda = 254$  nm,  $t_r = 14.339$  min (major), 16.948 min (minor).  $[\alpha]_D^{25} = -93.13$  (c 0.23,  $\text{CH}_2\text{Cl}_2$ ).  $^1\text{H}$  NMR (400 MHz,  $\text{DMSO-}d_6$ ):  $\delta$  9.11 (s, 1H), 7.29 – 7.24 (m, 2H), 7.07 – 6.97 (m, 2H), 6.68 – 6.62 (m, 2H), 3.59 – 3.22 (m, 2H), 2.81 – 2.67 (m, 2H), 1.95 (s, 3H), 1.89 (s, 3H), 1.45 – 1.28 (m, 1H),

1.13 – 1.05 (m, 1H), 0.93 – 0.64 (m, 3H), 0.54 – 0.48 (m, 3H).  $^{13}\text{C}\{^1\text{H}\}$  NMR (100 MHz, DMSO-*d*6):  $\delta$  170.5, 170.2, 154.7, 154.6, 138.6, 138.4, 137.5, 135.0, 134.9, 129.8(2), 129.7(5), 128.5, 128.4, 127.4, 127.2, 125.6, 124.0, 123.7, 120.8, 112.9, 112.7, 52.2, 47.8, 36.9, 31.8, 21.3, 20.6, 20.0, 19.8, 11.4, 11.2. HRMS-ESI (*m/z*): calcd for  $\text{C}_{20}\text{H}_{26}\text{NO}_2$  [ $\text{M} + \text{H}$ ] $^+$ : 312.1958, found 312.1951.

**(*R*)-*N*-Ethyl-2'-hydroxy-*N*-isopropyl-6,6'-dimethyl-[1,1'-biphenyl]-2-carboxamide (80)**

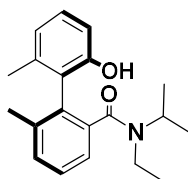

Eluent: 5:1 petroleum ether / ethyl acetate; white solid, 20.6 mg, 66% yield, 94% ee. mp: 174-176 °C. HPLC conditions: Chiralpak INC, isopropanol/hexanes = 3:97, flow: 1.0 mL/min,  $\lambda$  = 254 nm,  $t_r$  = 22.029 min (major), 26.795 min (minor).  $[\alpha]_D^{25} = -58.74$  (c 0.21,  $\text{CH}_2\text{Cl}_2$ ).  $^1\text{H}$  NMR (400 MHz, DMSO-*d*6):  $\delta$  9.15 (s, 1H), 7.27 – 7.25 (m, 2H), 7.10 – 6.97 (m, 2H), 6.69 – 6.61 (m, 2H), 4.13 – 3.78 (m, 1H), 3.30 – 3.23 (m, 1H), 2.84 – 2.67 (m, 1H), 1.95 (s, 3H), 1.92 (d, 3H), 0.98 – 0.89 (m, 6H), 0.68 – 0.60 (m, 3H).  $^{13}\text{C}\{^1\text{H}\}$  NMR (100 MHz, DMSO-*d*6):  $\delta$  169.6, 154.7, 138.7, 138.6, 137.4, 134.5, 129.5, 128.4, 127.3, 125.3, 123.4, 120.6, 112.4, 49.0, 34.1, 21.5, 21.1, 20.7, 20.0, 14.5. HRMS-ESI (*m/z*): calcd for  $\text{C}_{20}\text{H}_{26}\text{NO}_2$  [ $\text{M} + \text{H}$ ] $^+$ : 312.1958, found 312.1951.

**(*R*)-*N*-benzyl-2'-hydroxy-*N*,6,6'-trimethyl-[1,1'-biphenyl]-2-carboxamide (81)**

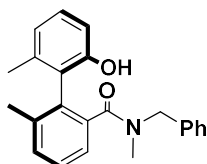

Eluent: 5:1 petroleum ether / ethyl acetate; light yellow oil, 25.2 mg, 73% yield, 97% ee. HPLC conditions: Chiralpak INC, isopropanol/hexanes = 10:90, flow: 1 mL/min,  $\lambda$  = 254 nm,  $t_r$  = 17.764 min (major), 20.736 min (minor).  $[\alpha]_D^{25} = -103.28$  (c 0.24,  $\text{CH}_2\text{Cl}_2$ ).  $^1\text{H}$  NMR (400 MHz, DMSO-*d*6):  $\delta$  9.11 (s, 1H), 7.35 – 7.31 (m, 2H), 7.17 – 7.05 (m, 5H), 6.77 – 6.70 (m, 2H), 6.63 (d,  $J$  = 6.0 Hz, 2H), 5.09 – 4.67 (m, 1H), 3.88 – 3.50 (m, 1H), 2.66 (s, 3H), 1.96 (s, 3H), 1.94 (s, 3H).  $^{13}\text{C}\{^1\text{H}\}$  NMR (100 MHz, DMSO-*d*6):  $\delta$  170.7, 155.0, 137.6, 135.0, 130.0, 129.1, 128.8, 128.6, 127.6, 127.3, 127.1, 125.5, 123.8, 121.0, 113.1, 49.3, 36.5, 20.7, 20.0. HRMS-ESI (*m/z*): calcd for  $\text{C}_{23}\text{H}_{24}\text{NO}_2$  [ $\text{M} + \text{H}$ ] $^+$ : 346.1802, found 346.1796.

**(*R*)-2'-Hydroxy-*N*,6,6'-trimethyl-*N*-(naphthalen-1-ylmethyl)-[1,1'-biphenyl]-2-carboxamide (82)**

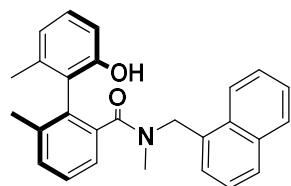

Eluent: 5:1 petroleum ether / ethyl acetate; white solid, 23.7 mg, 60% yield, 96% ee. mp: 179-181 °C. HPLC conditions: Chiralpak INC, isopropanol/hexanes = 20:80, flow: 1 mL/min,  $\lambda$  = 254 nm,  $t_r$  = 7.485

min (major), 11.722 min (minor).  $[\alpha]^{25}_D = -103.98$  (c 0.23,  $\text{CH}_2\text{Cl}_2$ ).  $^1\text{H}$  NMR (400 MHz,  $\text{DMSO-}d_6$ ):  $\delta$  9.24 (s, 1H), 7.95 – 7.82 (m, 2H), 7.77 (d,  $J = 8.4$  Hz, 1H), 7.53 – 7.48 (m, 2H), 7.34 – 7.05 (m, 5H), 6.87 – 6.71 (m, 2H), 6.52 (d,  $J = 6.0$  Hz, 1H), 5.21 – 5.17 (m, 1H), 4.68 – 4.47 (m, 1H), 2.77 (s, 3H), 1.97 (s, 3H), 1.96 (s, 3H).  $^{13}\text{C}\{^1\text{H}\}$  NMR (100 MHz,  $\text{DMSO-}d_6$ ):  $\delta$  170.8, 155.0, 137.7, 135.1, 133.7, 132.5, 131.3, 130.8, 130.1, 129.0, 128.8, 127.6, 127.5, 126.8, 126.2, 124.2, 123.9, 123.4, 121.1, 113.1, 47.7, 37.1, 20.7, 20.0. HRMS-ESI ( $m/z$ ): calcd for  $\text{C}_{27}\text{H}_{26}\text{NO}_2$   $[\text{M} + \text{H}]^+$ : 396.1958, found 396.1952.

**(R)-N-Benzyl-2'-hydroxy-N-isopropyl-6,6'-dimethyl-[1,1'-biphenyl]-2-carboxamide (83)**

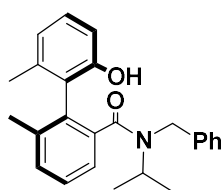

Eluent: 5:1 petroleum ether / ethyl acetate; white solid, 18.7 mg, 50% yield, >99% ee. mp: 151-152 °C. HPLC conditions: Chiralpak INC, isopropanol/hexanes = 10:90, flow: 1 mL/min,  $\lambda = 254$  nm,  $t_r = 18.458$  min (major), 22.276 min (minor).  $[\alpha]^{25}_D = -91.53$  (c 0.18,  $\text{CH}_2\text{Cl}_2$ ).  $^1\text{H}$  NMR (400 MHz,  $\text{DMSO-}d_6$ ):  $\delta$  9.26 (s, 1H), 7.32 – 7.31 (m, 2H), 7.21 – 7.16 (m, 2H), 7.05 – 7.02 (m, 3H), 6.76 (t,  $J = 8.4$  Hz, 3H), 6.46 (d,  $J = 6.4$  Hz, 2H), 4.78 (d,  $J = 16.4$  Hz, 1H), 4.08 – 4.01 (m, 2H), 1.98 (s, 3H), 1.95 (s, 3H), 1.03 (d,  $J = 6.8$  Hz, 3H), 0.72 (d,  $J = 6.4$  Hz, 3H).  $^{13}\text{C}\{^1\text{H}\}$  NMR (100 MHz,  $\text{DMSO-}d_6$ ):  $\delta$  170.9, 155.1, 139.9, 138.9, 138.4, 137.5, 134.6, 129.7, 128.8, 128.3, 127.5, 126.3, 126.0, 125.4, 123.4, 121.0, 112.8, 49.6, 42.9, 21.5, 20.8, 20.7, 20.0. HRMS-ESI ( $m/z$ ): calcd for  $\text{C}_{25}\text{H}_{28}\text{NO}_2$   $[\text{M} + \text{H}]^+$ : 374.2115, found 374.2110.

**(R)-(2'-Hydroxy-6,6'-dimethyl-[1,1'-biphenyl]-2-yl)(pyrrolidin-1-yl)methanone (84)**

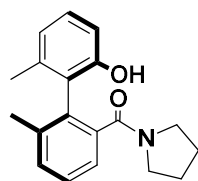

Eluent: 2:1 petroleum ether / ethyl acetate; light yellow oil, 11.8 mg, 40% yield, 93% ee. HPLC conditions: Chiralpak INC, isopropanol/hexanes = 20:80, flow: 1.0 mL/min,  $\lambda = 254$  nm,  $t_r = 17.027$  min (major), 12.501 min (minor).  $[\alpha]^{25}_D = -64.42$  (c 0.11,  $\text{CH}_2\text{Cl}_2$ ).  $^1\text{H}$  NMR (400 MHz,  $\text{DMSO-}d_6$ ):  $\delta$  9.08 (s, 1H), 7.30 – 7.24 (m, 2H), 7.11 (dd,  $J = 6.8, 1.6$  Hz, 1H), 6.99 (t,  $J = 7.6$  Hz, 1H), 6.67 (dd,  $J = 16.8, 8.0$  Hz, 2H), 3.48 – 3.43 (m, 1H), 3.25 – 3.19 (m, 1H), 3.02 – 2.95 (m, 2H), 1.92 (s, 3H), 1.90 (s, 3H), 1.73 – 1.65 (m, 3H), 1.60 – 1.53 (m, 1H).  $^{13}\text{C}\{^1\text{H}\}$  NMR (100 MHz,  $\text{DMSO-}d_6$ ):  $\delta$  168.7, 154.6, 139.0, 138.5, 137.4, 134.9, 130.0, 128.3, 127.4, 125.7, 123.7, 120.8, 112.8, 48.2, 45.1, 26.0, 24.4, 20.6, 20.0. HRMS-ESI ( $m/z$ ): calcd for  $\text{C}_{19}\text{H}_{22}\text{NO}_2$   $[\text{M} + \text{H}]^+$ : 296.1645, found 296.1639.

**(R)-Azepan-1-yl(2'-hydroxy-6,6'-dimethyl-[1,1'-biphenyl]-2-yl)methanone (85)**

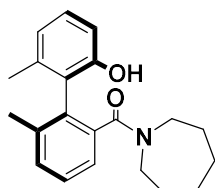

Eluent: 5:1 petroleum ether / ethyl acetate; white solid, 23.6 mg, 73% yield, 96% ee. mp: 153-155 °C. HPLC conditions: Chiralpak INC, isopropanol/hexanes = 10:90, flow: 1 mL/min,  $\lambda = 254$  nm,  $t_r = 30.997$  min (major), 25.120 min (minor).  $[\alpha]_D^{25} = -101.75$  (c 0.23,  $\text{CH}_2\text{Cl}_2$ ).  $^1\text{H}$  NMR (400 MHz,  $\text{DMSO}-d_6$ ):  $\delta$  9.11 (s, 1H), 7.27 – 7.24 (m, 2H), 7.05 – 6.98 (m, 2H), 6.69 – 6.63 (m, 2H), 3.35 – 3.29 (m, 2H), 3.17 – 3.08 (m, 2H), 1.91 (s, 6H), 1.54 – 1.31 (m, 8H).  $^{13}\text{C}\{^1\text{H}\}$  NMR (100 MHz,  $\text{DMSO}-d_6$ ):  $\delta$  170.2, 154.6, 138.7, 138.5, 137.4, 134.8, 129.7, 128.4, 127.3, 125.5, 123.9, 120.8, 112.8, 48.8, 44.5, 29.0, 28.3, 27.8, 26.1, 20.7, 20.0. HRMS-ESI ( $m/z$ ): calcd for  $\text{C}_{21}\text{H}_{26}\text{NO}_2$   $[\text{M}+\text{H}]^+$ : 324.1958, found 324.1953.

**(R)-(2'-Hydroxy-6,6'-dimethyl-[1,1'-biphenyl]-2-yl)(4-phenylpiperidin-1-yl)methanone (86)**

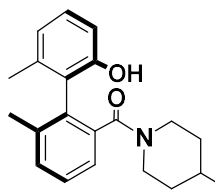

Eluent: 2:1 petroleum ether / ethyl acetate; white solid, 15.4 mg, 40% yield, 95% ee. mp: 224-225 °C. HPLC conditions: Chiralpak INC, isopropanol/hexanes = 3:97, flow: 1 mL/min,  $\lambda = 254$  nm,  $t_r = 43.383$  min (major), 40.196 min (minor).  $[\alpha]_D^{25} = -117.89$  (c 0.19,  $\text{CH}_2\text{Cl}_2$ ).  $^1\text{H}$  NMR (400 MHz,  $\text{DMSO}-d_6$ ):  $\delta$  9.20 (s, 0.6H), 9.10 (s, 0.4H), 7.32 – 7.18 (m, 6H), 7.16 – 7.00 (m, 3H), 6.77 – 6.65 (m, 2H), 4.39 (d,  $J = 12.8$  Hz, 1H), 3.66 (t,  $J = 10.8$  Hz, 1H), 2.97 – 2.36 (m, 3H), 1.96 – 1.92 (m, 6H), 1.74 – 0.81 (m, 4H).  $^{13}\text{C}\{^1\text{H}\}$  NMR (100 MHz,  $\text{DMSO}-d_6$ ):  $\delta$  168.9, 168.8, 154.8, 154.6, 146.3, 146.1, 138.7, 138.5, 138.1, 137.9, 137.5, 137.4, 134.9, 134.7, 129.9, 129.7, 128.8, 128.5, 128.4, 127.4, 127.2, 127.1, 126.6(4), 126.6(0), 125.6, 125.5, 124.0, 123.8, 120.8, 112.8, 112.5, 48.0, 46.9, 42.4, 41.9, 41.7, 41.5, 33.6, 33.5, 33.2, 20.7, 20.6, 20.0, 19.9. HRMS-ESI ( $m/z$ ): calcd for  $\text{C}_{26}\text{H}_{28}\text{NO}_2$   $[\text{M} + \text{H}]^+$ : 386.2115, found 386.2108.

**(R)-(2'-Hydroxy-6,6'-dimethyl-[1,1'-biphenyl]-2-yl)(morpholino)methanone (87)**

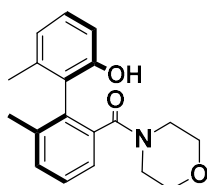

Eluent: 2:1 petroleum ether / ethyl acetate; white solid, 20.8 mg, 67% yield, 93% ee. mp: 154-155 °C. HPLC conditions: Chiralpak INC, isopropanol/hexanes = 10:90, flow: 1 mL/min,  $\lambda = 254$  nm,  $t_r = 19.346$  min (major), 17.063 min (minor).  $[\alpha]_D^{25} = -69.31$  (c 0.20,  $\text{CH}_2\text{Cl}_2$ ).  $^1\text{H}$  NMR (400 MHz,  $\text{DMSO}-d_6$ ):  $\delta$  9.16 (s, 1H), 7.28 (q,  $J = 7.6$  Hz, 2H), 7.09 – 7.01 (m, 2H), 6.69 (dd,  $J = 22.8$ , 8.0 Hz, 2H), 3.58 – 3.48 (m, 3H), 3.25 – 3.01 (m, 5H), 1.93 (s, 3H), 1.90 (s, 3H).  $^{13}\text{C}\{^1\text{H}\}$  NMR

(100 MHz, DMSO-*d*<sub>6</sub>):  $\delta$  169.1, 154.6, 138.5, 137.6, 137.2, 135.0, 130.1, 128.6, 127.5, 125.4, 124.0, 120.9, 112.7, 66.8, 66.5, 47.2, 41.6, 20.6, 20.0. HRMS-ESI (*m/z*): calcd for C<sub>19</sub>H<sub>22</sub>NO<sub>3</sub> [M + H]<sup>+</sup>: 312.1594, found 312.1589.

**(*R*)-(2'-Hydroxy-6,6'-dimethyl-[1,1'-biphenyl]-2-yl)(thiomorpholino)methanone (88)**

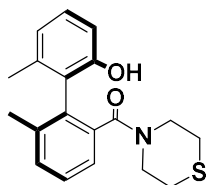

Eluent: 5:1 petroleum ether / ethyl acetate; white solid, 23.2 mg, 71% yield, 96% ee. mp: 158-160 °C. HPLC conditions: Chiralpak INC, isopropanol/hexanes = 10:90, flow: 1 mL/min,  $\lambda$  = 254 nm,  $t_r$  = 21.155 min (major), 14.706 min (minor).  $[\alpha]_D^{25} = -67.26$  (c 0.22, CH<sub>2</sub>Cl<sub>2</sub>). <sup>1</sup>H NMR (400 MHz, DMSO-*d*<sub>6</sub>):  $\delta$  9.15 (s, 1H), 7.31 – 7.25 (m, 2H), 7.11 (d, *J* = 6.8 Hz, 1H), 7.02 (t, *J* = 7.6 Hz, 1H), 6.68 (dd, *J* = 23.2, 8.0 Hz, 2H), 3.70 – 3.66 (m, 1H), 3.49 – 3.41 (m, 2H), 3.34 – 3.28 (m, 1H), 2.58 – 2.46 (m, 2H), 2.41 – 2.36 (m, 1H), 2.24 – 2.19 (m, 1H), 1.92 (s, 3H), 1.89 (s, 3H). <sup>13</sup>C {<sup>1</sup>H} NMR (100 MHz, DMSO-*d*<sub>6</sub>):  $\delta$  169.3, 154.5, 138.6, 137.6, 137.3, 134.9, 130.0, 128.6, 127.4, 125.4, 123.9, 120.9, 112.7, 49.5, 43.5, 27.5, 27.3, 20.5, 19.9. HRMS-ESI (*m/z*): calcd for C<sub>19</sub>H<sub>22</sub>NO<sub>2</sub>S [M + H]<sup>+</sup>: 328.1366, found 328.1360.

**(*R*)-(2'-Hydroxy-6,6'-dimethyl-[1,1'-biphenyl]-2-yl)(4-phenylpiperazin-1-yl)methanone (89)**

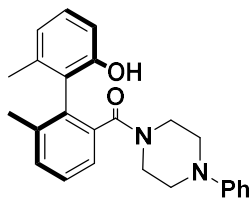

Eluent: 2:1 petroleum ether / ethyl acetate; white solid, 27.8 mg, 72% yield, 90% ee. mp: 209-210 °C. HPLC conditions: Chiralpak INC, isopropanol/hexanes = 10:90, flow: 1 mL/min,  $\lambda$  = 254 nm,  $t_r$  = 32.850 min (major), 24.301 min (minor).  $[\alpha]_D^{25} = -116.48$  (c 0.27, CH<sub>2</sub>Cl<sub>2</sub>). <sup>1</sup>H NMR (400 MHz, DMSO-*d*<sub>6</sub>):  $\delta$  9.19 (s, 1H), 7.30 (q, *J* = 7.6 Hz, 2H), 7.20 (t, *J* = 7.6 Hz, 2H), 7.11 (d, *J* = 6.0 Hz, 1H), 7.00 (t, *J* = 7.6 Hz, 1H), 6.90 (d, *J* = 8.0 Hz, 2H), 6.80 (t, *J* = 7.2 Hz, 1H), 6.70 – 6.65 (m, 2H), 3.63 – 3.60 (m, 2H), 3.38 – 3.08 (m, 5H), 2.79 (t, *J* = 8.8 Hz, 1H), 2.59 (t, *J* = 8.8 Hz, 1H), 1.95 (s, 3H), 1.93 (s, 3H). <sup>13</sup>C {<sup>1</sup>H} NMR (100 MHz, DMSO-*d*<sub>6</sub>):  $\delta$  169.0, 154.6, 151.4, 138.6, 137.6, 137.5, 135.1, 130.1, 129.5, 128.6, 127.5, 125.5, 124.0, 120.9, 119.9, 116.6, 112.8, 49.5, 49.0, 46.6, 41.1, 20.6, 20.0. HRMS-ESI (*m/z*): calcd for C<sub>25</sub>H<sub>27</sub>N<sub>2</sub>O<sub>2</sub> [M + H]<sup>+</sup>: 387.2067, found 387.2059.

***Tert*-Butyl (*R*)-*N*-(2'-hydroxy-6,6'-dimethyl-[1,1'-biphenyl]-2-carbonyl)-*N*-methylglycinate (90)**

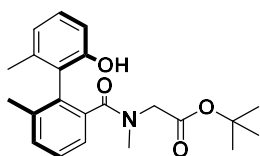

Eluent: 2:1 petroleum ether / ethyl acetate; light yellow oil, 22.9 mg, 62% yield, >99% ee. HPLC conditions: Chiralpak INC,

isopropanol/hexanes = 7:93, flow: 1 mL/min,  $\lambda = 254$  nm,  $t_r = 7.785$  min (major), 10.382 min (minor).  $[\alpha]_D^{25} = -91.82$  (c 0.22,  $\text{CH}_2\text{Cl}_2$ ).  $^1\text{H NMR}$  (400 MHz,  $\text{DMSO-}d_6$ ):  $\delta$  9.21 (s, 0.6H), 9.05 (s, 0.4H), 7.32 – 7.21 (m, 2H), 7.11 – 6.96 (m, 2H), 6.70 – 6.63 (m, 2H), 4.20 – 4.05 (m, 2H), 3.55 (t,  $J = 16.0$  Hz, 1H), 2.80 (s, 1.2H), 2.70 (s, 1.8H), 1.91 (d,  $J = 4.4$  Hz, 3H), 1.88 (s, 3H), 1.39 (d,  $J = 3.2$  Hz, 9H).  $^{13}\text{C}\{^1\text{H}\}$  NMR (100 MHz,  $\text{DMSO-}d_6$ ):  $\delta$  171.0, 170.9, 169.3, 168.5, 154.7, 154.5, 138.5, 138.3, 137.6, 137.5, 137.3, 137.2, 135.2, 134.9, 130.3, 130.2, 128.6, 128.4, 127.4, 127.2, 125.5, 125.3, 124.0, 123.3, 120.9, 120.8, 113.0, 112.9, 81.7, 81.3, 53.3, 49.5, 38.3, 33.7, 28.2, 28.1, 20.5, 19.9. HRMS-ESI ( $m/z$ ): calcd for  $\text{C}_{22}\text{H}_{28}\text{NO}_4$   $[\text{M} + \text{H}]^+$ : 370.2013, found 370.2006.

**(*R, E*)-2'-6-Dimethyl-6'-styryl-[1,1'-biphenyl]-2-yl diethylcarbamate (91)**

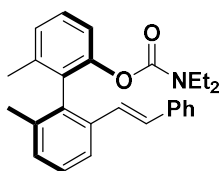

Eluent: 20:1 petroleum ether / ethyl acetate; light yellow oil, 27.2 mg, 68% yield, 99% ee. HPLC conditions: Chiralpak AD-H, isopropanol/hexanes = 10:90, flow: 1.0 mL/min,  $\lambda = 254$  nm,  $t_r = 4.053$  min (major), 3.661 min (minor).  $[\alpha]_D^{25} = -64.17$  (c 0.24,  $\text{CH}_2\text{Cl}_2$ ).  $^1\text{H NMR}$  (400 MHz,  $\text{CDCl}_3$ ):  $\delta$  7.59 (d,  $J = 8.0$  Hz, 1H), 7.34 – 7.27 (m, 4H), 7.24 (d,  $J = 7.6$  Hz, 2H), 7.21 – 7.13 (m, 4H), 6.95 (d,  $J = 16.4$  Hz, 1H), 6.76 (d,  $J = 16.4$  Hz, 1H), 3.13 (q,  $J = 6.8$  Hz, 1H), 2.88 (q,  $J = 6.8$  Hz, 1H), 2.00 (s, 3H), 1.94 (s, 3H), 0.95 (t,  $J = 6.8$  Hz, 3H), 0.70 (t,  $J = 6.8$  Hz, 3H).  $^{13}\text{C}\{^1\text{H}\}$  NMR (100 MHz,  $\text{CDCl}_3$ ):  $\delta$  153.6, 148.9, 138.0, 137.7, 137.1, 136.3, 135.7, 132.1, 129.0, 128.9, 128.5, 128.0, 127.4(4), 127.4(3), 127.2, 126.7, 126.6, 122.4, 120.5, 41.8, 41.4, 20.0, 19.6, 13.4, 13.0. HRMS-ESI ( $m/z$ ): calcd for  $\text{C}_{27}\text{H}_{30}\text{NO}_2$   $[\text{M} + \text{H}]^+$ : 400.2271, found 400.2272.

**(*R*)-2'-Ethyneyl-6,6'-dimethyl-[1,1'-biphenyl]-2-yl diethylcarbamate (92)**

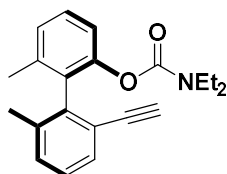

Eluent: 20:1 petroleum ether / ethyl acetate; light yellow oil, 15.8 mg, 54% yield, 99% ee. HPLC conditions: Chiralpak OD-H, isopropanol/hexanes = 2:98, flow: 0.5 mL/min,  $\lambda = 254$  nm,  $t_r = 13.932$  min (major), 14.745 min (minor).  $[\alpha]_D^{25} = -13.43$  (c 0.07,  $\text{CH}_2\text{Cl}_2$ ).  $^1\text{H NMR}$  (400 MHz,  $\text{CDCl}_3$ ):  $\delta$  7.41 (d,  $J = 7.6$  Hz, 1H), 7.29 (t,  $J = 8.0$  Hz, 1H), 7.24 (d,  $J = 7.2$  Hz, 1H), 7.21 – 7.17 (m, 2H), 7.14 (d,  $J = 7.2$  Hz, 1H), 3.22 – 3.11 (m, 2H), 2.98 – 2.87 (m, 2H), 2.82 (s, 1H), 2.02 (s, 6H), 0.99 (t,  $J = 6.0$  Hz, 3H), 0.73 (t,  $J = 6.4$  Hz, 3H).  $^{13}\text{C}\{^1\text{H}\}$  NMR (100 MHz,  $\text{CDCl}_3$ ):  $\delta$  153.4, 148.8, 139.7, 137.5, 132.1, 130.3, 130.1, 128.0, 127.1, 126.3, 122.4, 120.0, 100.0, 82.3, 79.1, 41.7, 41.4,

19.8, 19.4, 13.4, 13.1. HRMS-ESI ( $m/z$ ): calcd for  $C_{21}H_{24}NO_2$  [ $M + H$ ] $^+$ : 322.1802, found 322.1801.

**(*R*)-2',6-Dimethyl-6'-(phenylethynyl)-[1,1'-biphenyl]-2-yl diethylcarbamate (93)**

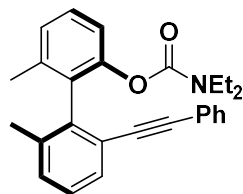

Eluent: 20:1 petroleum ether / ethyl acetate; light yellow oil, 19.1 mg, 48% yield, 99% ee. HPLC conditions: Chiralpak AD-H, isopropanol/hexanes = 2:98, flow: 1.0 mL/min,  $\lambda = 254$  nm,  $t_r = 7.438$  min (major), 6.911 min (minor).  $[\alpha]^{25}_D = -131.07$  (c 0.10,  $CH_2Cl_2$ ).  $^1H$  NMR (400 MHz,  $CDCl_3$ ):  $\delta$  7.43 (t,  $J = 5.2$  Hz, 1H), 7.33 (t,  $J = 7.6$  Hz, 1H), 7.24 – 7.19 (m, 6H), 7.15 (d,  $J = 7.6$  Hz, 1H), 7.09 – 7.06 (m, 2H), 3.23 – 3.10 (m, 2H), 2.97 – 2.87 (m, 2H), 2.08 (s, 3H), 2.05 (s, 3H), 0.99 (t,  $J = 7.2$  Hz, 3H), 0.72 (t,  $J = 6.8$  Hz, 3H).  $^{13}C$  { $^1H$ } NMR (100 MHz,  $CDCl_3$ ):  $\delta$  153.5, 149.1, 139.6, 137.8, 137.4, 132.5, 131.4, 129.8, 128.8, 128.0, 127.8(3), 127.7(6), 127.2, 126.2, 123.6, 123.5, 119.9, 91.8, 88.5, 41.7, 41.4, 19.9, 19.5, 13.4, 13.1. HRMS-ESI ( $m/z$ ): calcd for  $C_{27}H_{28}NO_2$  [ $M + H$ ] $^+$ : 398.2115, found 398.2111.

**(*R*)-6,6'-Dimethyl-[1,1':2',1''-terphenyl]-2-yl diethylcarbamate (94)**

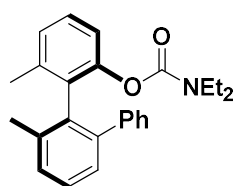

Eluent: 20:1 petroleum ether / ethyl acetate; light yellow oil, 30.6 mg, 82% yield, 99% ee. HPLC conditions: Chiralpak OD-H, isopropanol/hexanes = 2:98, flow: 0.5 mL/min,  $\lambda = 254$  nm,  $t_r = 12.144$  min (major), 13.904 min (minor).  $[\alpha]^{25}_D = -92.31$  (c 0.23,  $CH_2Cl_2$ ).  $^1H$  NMR (400 MHz,  $CDCl_3$ ):  $\delta$  7.34 – 7.28 (m, 1H), 7.26 – 7.21 (m, 2H), 7.17 – 7.12 (m, 6H), 7.10 – 7.08 (m, 1H), 6.91 – 6.89 (m, 1H), 3.27 – 3.19 (m, 2H), 3.05 – 2.91 (m, 2H), 2.04 (s, 3H), 1.84 (s, 3H), 1.07 (t,  $J = 6.8$  Hz, 3H), 0.73 (t,  $J = 6.8$  Hz, 3H).  $^{13}C$  { $^1H$ } NMR (100 MHz,  $CDCl_3$ ):  $\delta$  153.5, 149.2, 141.7, 138.8, 137.3, 137.2, 137.0, 136.3, 135.0, 132.3, 129.7, 128.8(4), 128.7(9), 128.4, 127.5, 127.4(5), 127.4(1), 127.3(7), 126.4, 126.1, 119.9, 101.2, 42.0, 41.5, 20.2, 19.7, 13.4, 13.2. HRMS-ESI ( $m/z$ ): calcd for  $C_{25}H_{28}NO_2$  [ $M + H$ ] $^+$ : 374.2115 found 374.2113.

**Methyl (*R*)-2'-((diethylcarbamoyloxy)-6,6'-dimethyl-[1,1'-biphenyl]-2-carboxylate (95)**

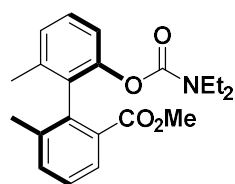

Eluent: 10:1 petroleum ether / ethyl acetate; light yellow oil, 23.1 mg, 65% yield, 99% ee. HPLC conditions: Chiralpak AD-H, isopropanol/hexanes = 10:90, flow: 1.0 mL/min,  $\lambda = 254$  nm,  $t_r = 4.611$  min (major), 4.295 min (minor).  $[\alpha]^{25}_D = -70.37$  (c 0.11,  $CH_2Cl_2$ ).  $^1H$  NMR (400 MHz,  $CDCl_3$ ):  $\delta$

7.75 (d,  $J = 8.0$  Hz, 1H), 7.41 (d,  $J = 7.6$  Hz, 1H), 7.30 (t,  $J = 7.6$  Hz, 1H), 7.25 (d,  $J = 7.6$  Hz, 1H), 7.11 (d,  $J = 8.0$  Hz, 2H), 3.57 (s, 3H), 3.16 – 3.11 (m, 2H), 2.88 – 2.83 (m, 2H), 2.01 (s, 3H), 2.00 (s, 3H), 0.97 (t,  $J = 6.4$  Hz, 3H), 0.68 (t,  $J = 6.4$  Hz, 3H).  $^{13}\text{C}\{^1\text{H}\}$  NMR (100 MHz,  $\text{CDCl}_3$ ):  $\delta$  167.8, 153.5, 148.1, 138.1, 137.4, 137.0, 133.3, 132.6, 131.2, 127.6, 127.4, 127.2, 126.1, 119.9, 51.8, 41.8, 41.3, 19.8, 19.6, 13.4, 13.1. HRMS-ESI ( $m/z$ ): calcd for  $\text{C}_{21}\text{H}_{26}\text{NO}_4$  [ $\text{M} + \text{H}$ ] $^+$ : 356.1856, found 356.1855.

**(R)-2'-Cyano-6,6'-dimethyl-[1,1'-biphenyl]-2-yl diethylcarbamate (96)**

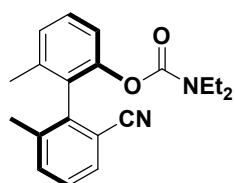

Eluent: 10:1 petroleum ether / ethyl acetate; light yellow oil, 28.6 mg, 89% yield, 99% ee. HPLC conditions: Chiralpak INC, isopropanol/hexanes = 10:90, flow: 1.0 mL/min,  $\lambda = 254$  nm,  $t_r = 14.323$  min (major), 16.822 min (minor).  $[\alpha]^{25}_{\text{D}} = -62.87$  (c 0.24,  $\text{CH}_2\text{Cl}_2$ ).  $^1\text{H}$  NMR (400 MHz,  $\text{CDCl}_3$ ):  $\delta$  7.57 (d,  $J = 8.0$  Hz, 1H), 7.48 (d,  $J = 8.0$  Hz, 1H), 7.34 (q,  $J = 8.0$  Hz, 2H), 7.18 (d,  $J = 8.0$  Hz, 2H), 3.18 – 3.10 (m, 2H), 3.08 – 2.88 (m, 2H), 2.09 (s, 3H), 2.03 (s, 3H), 0.96 (t,  $J = 6.8$  Hz, 3H), 0.76 (t,  $J = 7.2$  Hz, 3H).  $^{13}\text{C}\{^1\text{H}\}$  NMR (100 MHz,  $\text{CDCl}_3$ ):  $\delta$  153.2, 148.8, 140.4, 139.1, 137.2, 134.2, 130.1, 129.3, 127.9, 126.9, 120.4, 117.9, 113.8, 41.8, 41.5, 19.6, 19.4, 13.5, 13.1. HRMS-ESI ( $m/z$ ): calcd for  $\text{C}_{20}\text{H}_{23}\text{N}_2\text{O}_2$  [ $\text{M} + \text{H}$ ] $^+$ : 323.1754, found 323.1752.

**(R)-3-Benzoyl-2'-iodo-6,6'-dimethyl-[1,1'-biphenyl]-2-yl diethylcarbamate (97)**

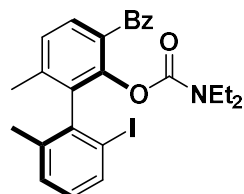

Eluent: 20:1 petroleum ether / ethyl acetate; white solid, 47.4 mg, 90% yield, 98% ee. HPLC conditions: Chiralpak INC, isopropanol/hexanes = 10:90, flow: 1 mL/min,  $\lambda = 254$  nm,  $t_r = 50.045$  min (major), 46.525 min (minor).  $[\alpha]^{25}_{\text{D}} = -16.25$  (c 0.16,  $\text{CH}_2\text{Cl}_2$ ).  $^1\text{H}$  NMR (400 MHz,  $\text{CDCl}_3$ ):  $\delta$  7.86 – 7.84 (m, 2H), 7.77 (d,  $J = 7.6$  Hz, 1H), 7.57 (d,  $J = 7.6$  Hz, 1H), 7.50 (t,  $J = 7.2$  Hz, 1H), 7.40 (t,  $J = 7.6$  Hz, 2H), 7.27 (d,  $J = 7.6$  Hz, 1H), 7.22 (d,  $J = 7.2$  Hz, 1H), 6.93 (t,  $J = 7.6$  Hz, 1H), 2.98 – 2.85 (m, 2H), 2.71 – 2.62 (m, 1H) 2.54 – 2.45 (m, 1H), 2.06 (s, 3H), 2.05 (s, 3H), 0.78 (t,  $J = 6.8$  Hz, 3H), 0.45 (t,  $J = 6.8$  Hz, 3H).  $^{13}\text{C}\{^1\text{H}\}$  NMR (100 MHz,  $\text{CDCl}_3$ ):  $\delta$  194.6, 152.2, 146.2, 140.9, 140.9, 138.8, 138.0, 137.3, 136.4, 132.3, 130.9, 130.0, 129.8, 129.2, 128.0, 126.6, 101.0, 41.9, 41.2, 21.3, 19.7, 13.1, 13.0. HRMS-ESI ( $m/z$ ): calcd for  $\text{C}_{26}\text{H}_{27}\text{INO}_3$  [ $\text{M} + \text{H}$ ] $^+$ : 528.1030, found 528.1025.



**(R)-2'-Iodo-6,6'-dimethyl-[1,1'-biphenyl]-2-ol (98)**

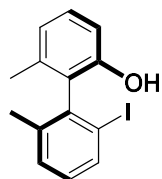

Eluent: 20:1 petroleum ether / ethyl acetate; light yellow oil, 28.8 mg, 89% yield, 98% ee. HPLC conditions: Chiralpak OD-H, isopropanol/hexanes = 1:99, flow: 1 mL/min,  $\lambda = 254$  nm,  $t_r = 25.976$  min (major), 23.645 min (minor).  $[\alpha]_D^{25} = +8.79$  (c 0.39,  $\text{CH}_2\text{Cl}_2$ ).  $^1\text{H NMR}$  (400 MHz,  $\text{CDCl}_3$ ):  $\delta$  7.85 (d,  $J = 8.0$  Hz, 1H), 7.33 (d,  $J = 7.6$  Hz, 1H), 7.23 (t,  $J = 7.6$  Hz, 1H), 7.02 (t,  $J = 7.6$  Hz, 1H), 6.88 (dd,  $J = 14.8, 7.2$  Hz, 2H), 4.45 (s, 1H), 2.09 (s, 3H), 1.95 (s, 3H).  $^{13}\text{C}\{^1\text{H}\}$  NMR (100 MHz,  $\text{CDCl}_3$ ):  $\delta$  151.8, 139.7, 139.6, 137.3, 136.7, 130.4, 130.2, 130.1, 129.1, 122.2, 113.0, 102.4, 21.2, 19.5. HRMS-ESI ( $m/z$ ): calcd for  $\text{C}_{14}\text{H}_{12}\text{IO}$   $[\text{M}-\text{H}]^-$ : 322.9938, found 322.9938.

**(R)-6,6'-Dimethyl-[1,1'-biphenyl]-2,2'-diol (99)**

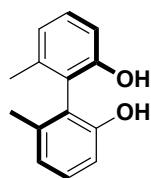

Eluent: 20:1 petroleum ether / ethyl acetate; white solid, 12.8 mg, 60% yield, 97% ee. HPLC conditions: Chiralpak OD-H, isopropanol/hexanes = 15:85, flow: 1 mL/min,  $\lambda = 254$  nm,  $t_r = 5.868$  min (major), 9.122 min (minor).  $[\alpha]_D^{25} = +50$  (c 0.06,  $\text{CH}_2\text{Cl}_2$ ).  $^1\text{H NMR}$  (400 MHz,  $\text{CDCl}_3$ ):  $\delta$  7.23 (t,  $J = 8.0$  Hz, 2H), 6.89 (t,  $J = 8.8$  Hz, 2H), 4.74 (s, 2H), 1.99 (s, 6H).  $^{13}\text{C}\{^1\text{H}\}$  NMR (100 MHz,  $\text{CDCl}_3$ ):  $\delta$  153.8, 138.9, 130.1, 122.5, 119.6, 113.2, 19.5. HRMS-ESI ( $m/z$ ): calcd for  $\text{C}_{14}\text{H}_{13}\text{O}_2$   $[\text{M} - \text{H}]^-$ : 213.0921, found 213.0917.

**(R)-2',6-Dimethyl-6'-(phenylamino)-[1,1'-biphenyl]-2-yl diethylcarbamate (100)**

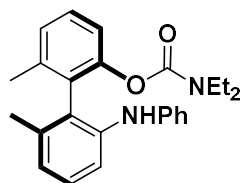

Eluent: 20:1 petroleum ether / ethyl acetate; light yellow oil, 15.5 mg, 40% yield, 96% ee. HPLC conditions: Chiralpak INC, isopropanol/hexanes = 3:97, flow: 1.0 mL/min,  $\lambda = 254$  nm,  $t_r = 4.384$  min (major), 4.141 min (minor).  $[\alpha]_D^{25} = -51.67$  (c 0.06,  $\text{CH}_2\text{Cl}_2$ ).  $^1\text{H NMR}$  (400 MHz,  $\text{DMSO}-d_6$ ):  $\delta$  7.32 (t,  $J = 7.6$  Hz, 1H), 7.21 (d,  $J = 7.6$  Hz, 1H), 7.18 – 7.10 (m, 4H), 7.09 (d,  $J = 8.0$  Hz, 1H), 6.89 – 6.84 (m, 3H), 6.77 (t,  $J = 7.6$  Hz, 1H), 6.11 (s, 1H), 3.20 – 2.92 (m, 4H), 1.93 (s, 3H), 1.86 (s, 3H), 0.86 (t,  $J = 6.8$  Hz, 3H), 0.75 (t,  $J = 7.2$  Hz, 3H).  $^{13}\text{C}\{^1\text{H}\}$  NMR (100 MHz,  $\text{DMSO}-d_6$ ):  $\delta$  154.5, 149.9, 144.1, 141.8, 138.6, 137.6, 131.5, 129.6, 128.8, 128.5, 127.8, 126.9, 123.0, 121.2, 120.2, 117.4, 115.2, 42.1, 41.8, 40.6, 40.4, 40.2, 40.0, 39.8, 39.6, 39.4, 20.2, 19.6, 13.8, 13.4. HRMS-ESI ( $m/z$ ): calcd for  $\text{C}_{25}\text{H}_{29}\text{N}_2\text{O}_2$   $[\text{M}+\text{H}]^+$  389.2224, found 389.2219.

**(R)-2',6-Dimethyl-6'-(phenylamino)-[1,1'-biphenyl]-2-ol (101)**

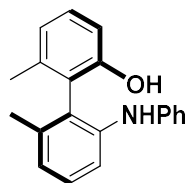

Eluent: 20:1 petroleum ether / ethyl acetate; white solid, 23.1 mg, 80% yield, 99% ee. HPLC conditions: Chiralpak AD-H, isopropanol/hexanes = 10:90, flow: 1 mL/min,  $\lambda = 254$  nm,  $t_r = 5.614$  min (major), 6.549 min (minor).  $[\alpha]_D^{25} = +7.14$  (c 0.04,  $\text{CH}_2\text{Cl}_2$ ).  $^1\text{H NMR}$  (400 MHz,  $\text{DMSO-}d_6$ ):  $\delta$  9.09 (s, 1H), 7.14 – 7.10 (m, 4H), 7.07 (t,  $J = 7.6$  Hz, 1H), 6.93 (d,  $J = 8.0$  Hz, 2H), 6.87 (dd,  $J = 6.0, 2.4$  Hz, 1H), 6.79 – 6.74 (m, 3H), 5.93 (s, 1H), 1.89 (s, 3H), 1.85 (s, 3H).  $^{13}\text{C}\{^1\text{H}\}$  NMR (100 MHz,  $\text{DMSO-}d_6$ ):  $\delta$  155.4, 144.8, 141.3, 138.0, 137.9, 129.4, 129.0, 128.6, 127.6, 124.1, 123.0, 121.2, 119.9, 117.3, 116.2, 113.6, 20.3, 19.9. HRMS-ESI ( $m/z$ ): calcd for  $\text{C}_{20}\text{H}_{20}\text{NO}$   $[\text{M} + \text{H}]^+$ : 290.1539, found 290.1535.

**(R)-2'-((Diethylamino)methyl)-6,6'-dimethyl-[1,1'-biphenyl]-2-ol (102)**

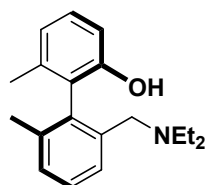

Eluent: 10:1 petroleum ether / ethyl acetate; colorless liquid, 27.4 mg, 97% yield, 52% ee. HPLC conditions: Chiralpak OJ-H, isopropanol/hexanes = 3:97, flow: 1.0 mL/min,  $\lambda = 254$  nm,  $t_r = 3.344$  min (major), 3.752 min (minor).  $[\alpha]_D^{25} = -23.37$  (c 0.47,  $\text{CH}_2\text{Cl}_2$ ).  $^1\text{H NMR}$  (400 MHz,  $\text{DMSO-}d_6$ ):  $\delta$  9.32 (s, 1H), 7.33 (d,  $J = 7.2$  Hz, 1H), 7.21 – 7.14 (m, 2H), 7.05 (t,  $J = 7.6$  Hz, 1H), 6.76 (t,  $J = 7.2$  Hz, 2H), 3.12 (s, 2H), 2.32 (q,  $J = 7.2$  Hz, 4H), 1.86 (s, 3H), 1.78 (s, 3H), 0.80 (t,  $J = 7.2$  Hz, 6H).  $^{13}\text{C}\{^1\text{H}\}$  NMR (100 MHz,  $\text{DMSO-}d_6$ ):  $\delta$  154.6, 137.9, 137.2, 136.3, 128.6, 128.3, 127.3, 127.0, 126.9, 121.2, 114.3, 55.5, 46.5, 20.1, 20.0, 11.7. HRMS-ESI ( $m/z$ ): calcd for  $\text{C}_{19}\text{H}_{26}\text{NO}$   $[\text{M} + \text{H}]^+$ : 284.2009, found 284.2005.

**(R)-2'-(Azepan-1-ylmethyl)-6,6'-dimethyl-[1,1'-biphenyl]-2-ol (103)**

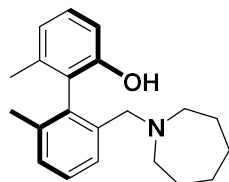

Eluent: 10:1 petroleum ether / ethyl acetate; light yellow oil, 25.3 mg, 82% yield, >99% ee. HPLC conditions: Chiralpak INC, isopropanol/hexanes = 3:97, flow: 1.0 mL/min,  $\lambda = 254$  nm,  $t_r = 5.281$  min (major), 4.862 min (minor).  $[\alpha]_D^{25} = -34.92$  (c 0.13,  $\text{CH}_2\text{Cl}_2$ ).  $^1\text{H NMR}$  (400 MHz,  $\text{DMSO-}d_6$ ):  $\delta$  9.29 (s, 1H), 7.37 (d,  $J = 7.2$  Hz, 1H), 7.21 (t,  $J = 7.2$  Hz, 1H), 7.16 (d,  $J = 7.2$  Hz, 1H), 7.06 (t,  $J = 7.6$  Hz, 1H), 6.77 – 6.75 (m, 2H), 3.21 (q,  $J = 14.4$  Hz, 2H), 2.45 (s, 4H), 1.86 (s, 3H), 1.77 (s, 3H), 1.51 (s, 8H).  $^{13}\text{C}\{^1\text{H}\}$  NMR (100 MHz,  $\text{DMSO-}d_6$ ):  $\delta$  154.5, 137.8, 137.1, 136.4, 128.6,

128.3, 127.0, 126.5, 121.2, 114.1, 60.2, 55.6, 27.7, 26.8, 20.1, 20.0. HRMS-ESI ( $m/z$ ): calcd for  $C_{21}H_{28}NO$   $[M + H]^+$ : 310.2165, found 310.2156.

**(*R*)-2'-(Diethylcarbamoyl)-6,6'-dimethyl-[1,1'-biphenyl]-2-yl trifluoromethanesulfonate (104)**

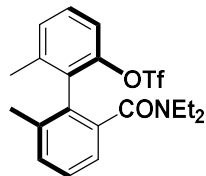

Eluent: 20:1 petroleum ether / ethyl acetate; white solid, 21.4 mg, 50% yield, 99% ee. HPLC conditions: Chiralpak INC, isopropanol/hexanes = 2:98, flow: 1.0 mL/min,  $\lambda = 254$  nm,  $t_r = 10.279$  min (major), 9.05 min (minor).  $[\alpha]_D^{25} = -60.0$  (c 0.08,  $CH_2Cl_2$ ).  $^1H$  NMR (400 MHz,  $CDCl_3$ ):  $\delta$  7.36 – 7.33 (m, 2H), 7.29 (d,  $J = 7.6$  Hz, 2H), 7.18 – 7.15 (m, 1H), 7.10 (d,  $J = 7.6$  Hz, 1H), 3.66 – 3.56 (m, 1H), 3.44 – 3.36 (m, 1H), 3.08 – 2.92 (m, 2H), 2.15 (s, 3H), 2.09 (s, 3H), 1.13 (t,  $J = 6.8$  Hz, 3H), 0.78 (t,  $J = 6.8$  Hz, 3H).  $^{13}C\{^1H\}$  NMR (100 MHz,  $CDCl_3$ ):  $\delta$  169.2, 147.1, 138.1, 137.0, 132.0, 131.5, 130.6, 129.5, 129.0, 128.0, 122.8, 119.8, 117.5, 116.7, 42.7, 37.9, 20.1, 19.5, 13.9, 11.7.  $^{19}F$  NMR (376 MHz,  $CDCl_3$ ):  $\delta$  -74.77 (s). HRMS-ESI ( $m/z$ ): calcd for  $C_{20}H_{23}F_3NO_4S$   $[M + H]^+$ : 430.1294, found 430.1293.

## I. Crystal data and structure refinement

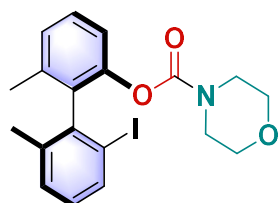

**23**

≡

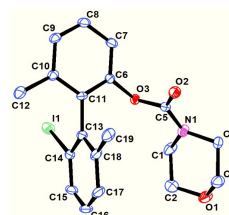

X-ray structure of **23**

**Table S2.** Crystal data and structure refinements for **23**

| Compound                                  | <b>23</b>                                                     |
|-------------------------------------------|---------------------------------------------------------------|
| Empirical formula                         | C <sub>19</sub> H <sub>20</sub> INO <sub>3</sub>              |
| Formula weight                            | 437.26                                                        |
| Temperature/K                             | 170.0                                                         |
| Crystal system                            | Monoclinic                                                    |
| Space group                               | P2 <sub>1</sub>                                               |
| a/Å                                       | 7.9482(3)                                                     |
| b/Å                                       | 8.5150(3)                                                     |
| c/Å                                       | 14.1656(6)                                                    |
| α/°                                       | 90                                                            |
| β/°                                       | 105.8200(10)                                                  |
| γ/°                                       | 90                                                            |
| Volume/Å <sup>3</sup>                     | 922.40(6)                                                     |
| Z                                         | 2                                                             |
| Density (calculated)/g•cm <sup>-3</sup>   | 1.574                                                         |
| μ/mm <sup>-1</sup>                        | 1.752                                                         |
| F(000)                                    | 436.0                                                         |
| Crystal size/mm <sup>3</sup>              | 0.08 × 0.05 × 0.04                                            |
| Radiation                                 | MoKα (λ = 0.71073)                                            |
| 2θ range for data collection/°            | 5.328 to 52.806                                               |
| Index ranges                              | -9 ≤ h ≤ 9, -10 ≤ k ≤ 10, -16 ≤ l ≤ 17                        |
| Reflections collected                     | 10652                                                         |
| Independent reflections                   | 3631 [R <sub>int</sub> = 0.0344, R <sub>sigma</sub> = 0.0420] |
| Data/restraints/parameters                | 3631/1/219                                                    |
| Goodness-of-fit on F <sup>2</sup>         | 1.099                                                         |
| Final R indexes [I ≥ 2σ (I)]              | R <sub>1</sub> = 0.0283, wR <sub>2</sub> = 0.0515             |
| Final R indexes [all data]                | R <sub>1</sub> = 0.0376, wR <sub>2</sub> = 0.0574             |
| Largest diff. peak/hole/e Å <sup>-3</sup> | 0.44/-0.73                                                    |
| Flack parameter                           | -0.047(13)                                                    |

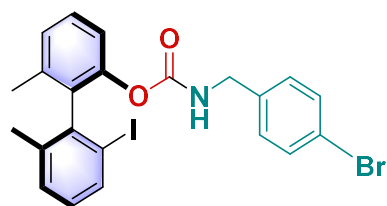

**39**

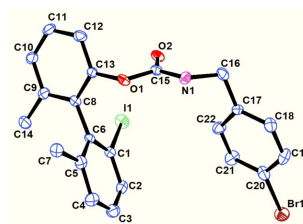

X-ray structure of **39**

**Table S3.** Crystal data and structure refinements for **39**

| Compound                                  | <b>39</b>                                                     |
|-------------------------------------------|---------------------------------------------------------------|
| Empirical formula                         | C <sub>22</sub> H <sub>19</sub> BrINO <sub>2</sub>            |
| Formula weight                            | 536.19                                                        |
| Temperature/K                             | 150                                                           |
| Crystal system                            | monoclinic                                                    |
| Space group                               | P2 <sub>1</sub>                                               |
| a/Å                                       | 12.4830(18)                                                   |
| b/Å                                       | 8.0886(9)                                                     |
| c/Å                                       | 21.009(3)                                                     |
| α/°                                       | 90                                                            |
| β/°                                       | 93.942(4)                                                     |
| γ/°                                       | 90                                                            |
| Volume/Å <sup>3</sup>                     | 2116.3(5)                                                     |
| Z                                         | 4                                                             |
| Density (calculated)/g•cm <sup>-3</sup>   | 1.683                                                         |
| μ/mm <sup>-1</sup>                        | 3.417                                                         |
| F(000)                                    | 1048.0                                                        |
| Crystal size/mm <sup>3</sup>              | 0.09 × 0.05 × 0.04                                            |
| Radiation                                 | MoKα (λ = 0.71073)                                            |
| 2θ range for data collection/°            | 3.918 to 50.684                                               |
| Index ranges                              | -14 ≤ h ≤ 14, -9 ≤ k ≤ 9, -25 ≤ l ≤ 25                        |
| Reflections collected                     | 16502                                                         |
| Independent reflections                   | 6454 [R <sub>int</sub> = 0.0843, R <sub>sigma</sub> = 0.0970] |
| Data/restraints/parameters                | 6454/1/491                                                    |
| Goodness-of-fit on F <sup>2</sup>         | 1.032                                                         |
| Final R indexes [I ≥ 2σ (I)]              | R <sub>1</sub> = 0.0546, wR <sub>2</sub> = 0.1246             |
| Final R indexes [all data]                | R <sub>1</sub> = 0.0790, wR <sub>2</sub> = 0.1418             |
| Largest diff. peak/hole/e Å <sup>-3</sup> | 1.38/-0.94                                                    |
| Flack parameter                           | 0.028(16)                                                     |

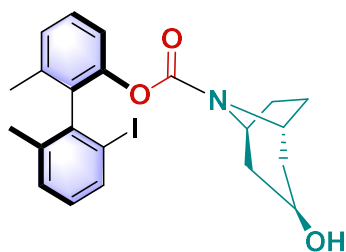

**55**

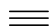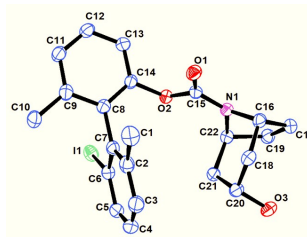

X-ray structure of **55**

**Table S4.** Crystal data and structure refinements for **55**

| Compound                                  | <b>55</b>                                                     |
|-------------------------------------------|---------------------------------------------------------------|
| Empirical formula                         | C <sub>22</sub> H <sub>24</sub> INO <sub>3</sub>              |
| Formula weight                            | 477.32                                                        |
| Temperature/K                             | 150                                                           |
| Crystal system                            | monoclinic                                                    |
| Space group                               | P2 <sub>1</sub> /c                                            |
| a/Å                                       | 18.1680(6)                                                    |
| b/Å                                       | 14.5103(5)                                                    |
| c/Å                                       | 15.8483(5)                                                    |
| α/°                                       | 90                                                            |
| β/°                                       | 99.0800(10)                                                   |
| γ/°                                       | 90                                                            |
| Volume/Å <sup>3</sup>                     | 4125.6(2)                                                     |
| Z                                         | 8                                                             |
| Density (calculated)/g•cm <sup>-3</sup>   | 1.537                                                         |
| μ/mm <sup>-1</sup>                        | 1.574                                                         |
| F(000)                                    | 1920.0                                                        |
| Crystal size/mm <sup>3</sup>              | 0.16 × 0.08 × 0.04                                            |
| Radiation                                 | MoKα (λ = 0.71073)                                            |
| 2θ range for data collection/°            | 3.828 to 52.798                                               |
| Index ranges                              | -22 ≤ h ≤ 22, -18 ≤ k ≤ 16, -19 ≤ l ≤ 19                      |
| Reflections collected                     | 30574                                                         |
| Independent reflections                   | 8338 [R <sub>int</sub> = 0.0505, R <sub>sigma</sub> = 0.0472] |
| Data/restraints/parameters                | 8338/579/531                                                  |
| Goodness-of-fit on F <sup>2</sup>         | 1.084                                                         |
| Final R indexes [I ≥ 2σ (I)]              | R <sub>1</sub> = 0.0446, wR <sub>2</sub> = 0.0947             |
| Final R indexes [all data]                | R <sub>1</sub> = 0.0624, wR <sub>2</sub> = 0.1034             |
| Largest diff. peak/hole/e Å <sup>-3</sup> | 0.45/-0.34                                                    |

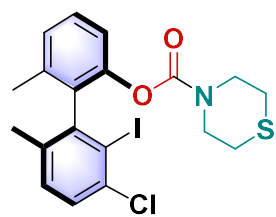

**64**

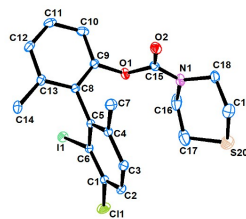

X-ray structure of **64**

**Table 5. Crystal data and structure refinements for (*R*)-64**

| Compound                                                     | <b>64</b>                                                                    |
|--------------------------------------------------------------|------------------------------------------------------------------------------|
| Empirical formula                                            | C <sub>19</sub> H <sub>19</sub> ClINO <sub>2</sub> S                         |
| Formula weight                                               | 487.76                                                                       |
| Temperature/K                                                | 170.0                                                                        |
| Crystal system                                               | monoclinic                                                                   |
| Space group                                                  | P2 <sub>1</sub>                                                              |
| <i>a</i> /Å                                                  | 8.7600(3)                                                                    |
| <i>b</i> /Å                                                  | 10.9737(3)                                                                   |
| <i>c</i> /Å                                                  | 10.8434(4)                                                                   |
| $\alpha$ /°                                                  | 90                                                                           |
| $\beta$ /°                                                   | 105.8870(10)                                                                 |
| $\gamma$ /°                                                  | 90                                                                           |
| Volume/Å <sup>3</sup>                                        | 1002.56(6)                                                                   |
| <i>Z</i>                                                     | 2                                                                            |
| Density (calculated)/g•cm <sup>-3</sup>                      | 1.616                                                                        |
| $\mu$ /mm <sup>-1</sup>                                      | 1.846                                                                        |
| F(000)                                                       | 484.0                                                                        |
| Crystal size/mm <sup>3</sup>                                 | 0.25 × 0.15 × 0.08                                                           |
| Radiation                                                    | MoK $\alpha$ ( $\lambda$ = 0.71073)                                          |
| 2 $\theta$ range for data collection/°                       | 5.32 to 52.792                                                               |
| Index ranges                                                 | -8 ≤ <i>h</i> ≤ 10, -13 ≤ <i>k</i> ≤ 11, -13 ≤ <i>l</i> ≤ 13                 |
| Reflections collected                                        | 7712                                                                         |
| Independent reflections                                      | 3621 [ <i>R</i> <sub>int</sub> = 0.0245, <i>R</i> <sub>sigma</sub> = 0.0371] |
| Data/restraints/parameters                                   | 3621/1/228                                                                   |
| Goodness-of-fit on <i>F</i> <sup>2</sup>                     | 1.063                                                                        |
| Final <i>R</i> indexes [ <i>I</i> ≥ 2 $\sigma$ ( <i>I</i> )] | <i>R</i> <sub>1</sub> = 0.0242, <i>wR</i> <sub>2</sub> = 0.0459              |
| Final <i>R</i> indexes [all data]                            | <i>R</i> <sub>1</sub> = 0.0276, <i>wR</i> <sub>2</sub> = 0.0482              |
| Largest diff. peak/hole/e Å <sup>-3</sup>                    | 0.38/-0.61                                                                   |
| Flack parameter                                              | 0.032(12)                                                                    |

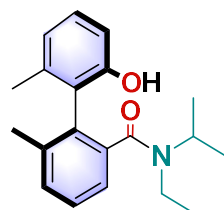

**80**

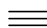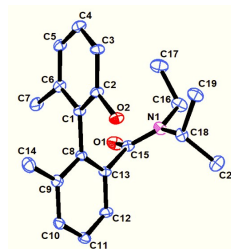

X-ray structure of **80**

**Table S5.** Crystal data and structure refinements for **80**

| Compound                                    | <b>80</b>                                                     |
|---------------------------------------------|---------------------------------------------------------------|
| Empirical formula                           | C <sub>20</sub> H <sub>25</sub> NO <sub>2</sub>               |
| Formula weight                              | 311.41                                                        |
| Temperature/K                               | 150.0                                                         |
| Crystal system                              | trigonal                                                      |
| Space group                                 | P3 <sub>2</sub>                                               |
| a/Å                                         | 24.3390(16)                                                   |
| b/Å                                         | 24.3390(16)                                                   |
| c/Å                                         | 7.9076(6)                                                     |
| α/°                                         | 90                                                            |
| β/°                                         | 90                                                            |
| γ/°                                         | 120                                                           |
| Volume/Å <sup>3</sup>                       | 4056.8(6)                                                     |
| Z                                           | 9                                                             |
| ρ <sub>calc</sub> /cm <sup>3</sup>          | 1.147                                                         |
| μ/mm <sup>-1</sup>                          | 0.073                                                         |
| F(000)                                      | 1512.0                                                        |
| Crystal size/mm <sup>3</sup>                | 0.12 × 0.07 × 0.04                                            |
| Radiation                                   | MoKα (λ = 0.71073)                                            |
| 2θ range for data collection/°              | 3.864 to 52.722                                               |
| Index ranges                                | -13 ≤ h ≤ 29, -30 ≤ k ≤ 28, -9 ≤ l ≤ 8                        |
| Reflections collected                       | 11341                                                         |
| Independent reflections                     | 8498 [R <sub>int</sub> = 0.0664, R <sub>sigma</sub> = 0.1321] |
| Data/restraints/parameters                  | 8498/1129/641                                                 |
| Goodness-of-fit on F <sup>2</sup>           | 1.101                                                         |
| Final R indexes [I ≥ 2σ (I)]                | R <sub>1</sub> = 0.0722, wR <sub>2</sub> = 0.1285             |
| Final R indexes [all data]                  | R <sub>1</sub> = 0.1366, wR <sub>2</sub> = 0.1671             |
| Largest diff. peak/hole / e Å <sup>-3</sup> | 0.26/-0.28                                                    |



## References

- (1) (a) Zhu, K.; Xu, K.; Fang, Q.; Wang, Y.; Tang, B. C.; Zhang, F. Z. *ACS Catal.* **2019**, *9*, 4951. (b) Xu, S. B.; Zhao, K.; Gu, Z. H. *Adv. Synth. Catal.* **2018**, *360*, 3877. (c) Zhao, K.; Duan, L. H.; Xu, S. B.; Jiang, J. L.; Fu, Y.; Gu, Z. H. *Chem.* **2018**, *4*, 599.
- (2) Duan, L. H.; Wang, Z. G.; Zhao, K.; Gu, Z. H. *Chem. Commun.*, **2021**, *57*, 3881.
- (3) Xie, H.; Yang, S.; Zhang, C. X.; Ding, M. R.; Liu, M.; Guo, J.; Zhang, F.Z. *J. Org. Chem.* **2017**, *82*, 5250.
- (4) (a) Li, S.; Cai, L.; Ji, H.; Yang, L.; Li, J. *Nat. Commun.* **2016**, *7*, 10443. (b) Wang, L.; Shi, F. X.; Qi, C. R.; Xu, W. J.; Xiong, W. F.; Kang, B.X.; Jiang, H. F. *Chem. Sci.*, **2021**, *12*, 11821.
- (5) Sanz, R.; Pilar Castroviejo, M.; Fernandez, Y.; Fananas, F. J. *J. Org. Chem.* **2005**, *70*, 6548.
- (6) Dong, Y.; Guo, X.; Yu, Y.; Liu, G.; *Mol. Diversity*, **2013**, *17*, 1.
- (7) Sharma, S.; Kim, A.; Park, E.; Park, J.; Kim, M.; Kwak, J. H.; Lee, S. H.; Jung, Y. H.; Kim, I. S. *Adv. Synth. Catal.*, **2013**, *355*, 667.
- (8) (a) Gou, B. B.; Tang, Y.; Lin, Y. H.; Yu, L.; Jian, Q. S.; Sun, H. R.; Chen, J.; Zhou, L. *Angew. Chem. Int. Ed.* **2022**, *61*, e202208174. (b) Ke, J.; Zu, B.; Guo, Y. H.; Li, Y. Z.; He, C. *Org. Lett.* **2021**, *23*, 329.

## J. Copies of NMR spectroscopies

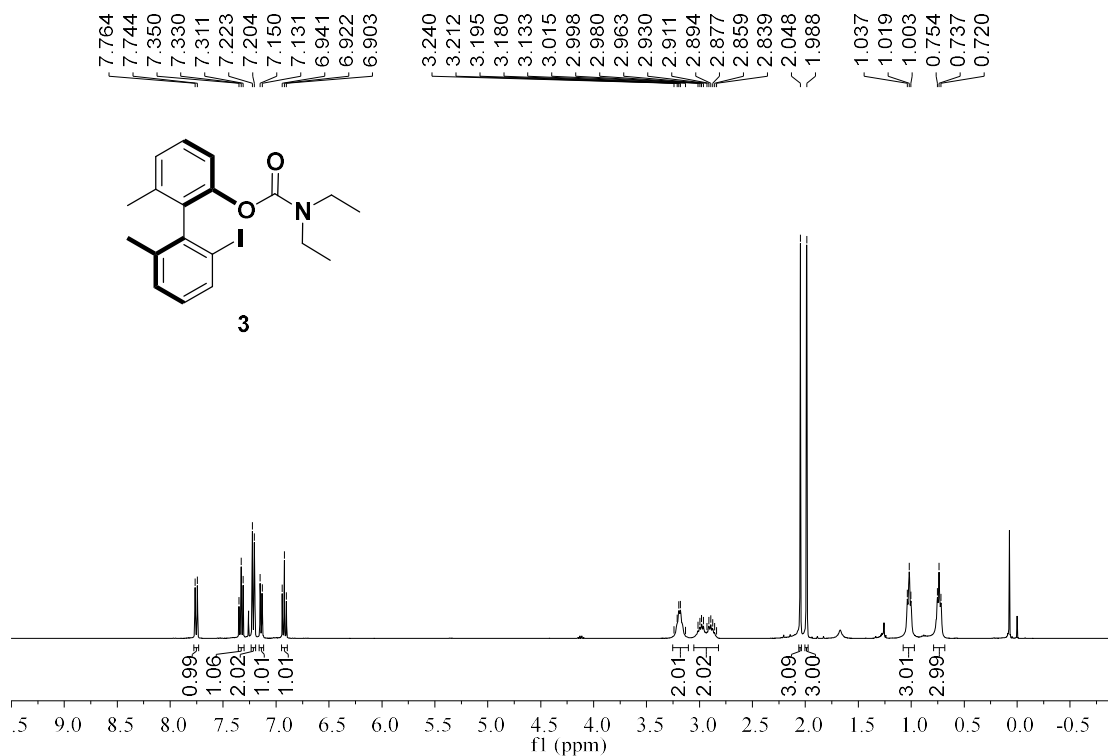

Figure S1. <sup>1</sup>H NMR Spectrum of 3

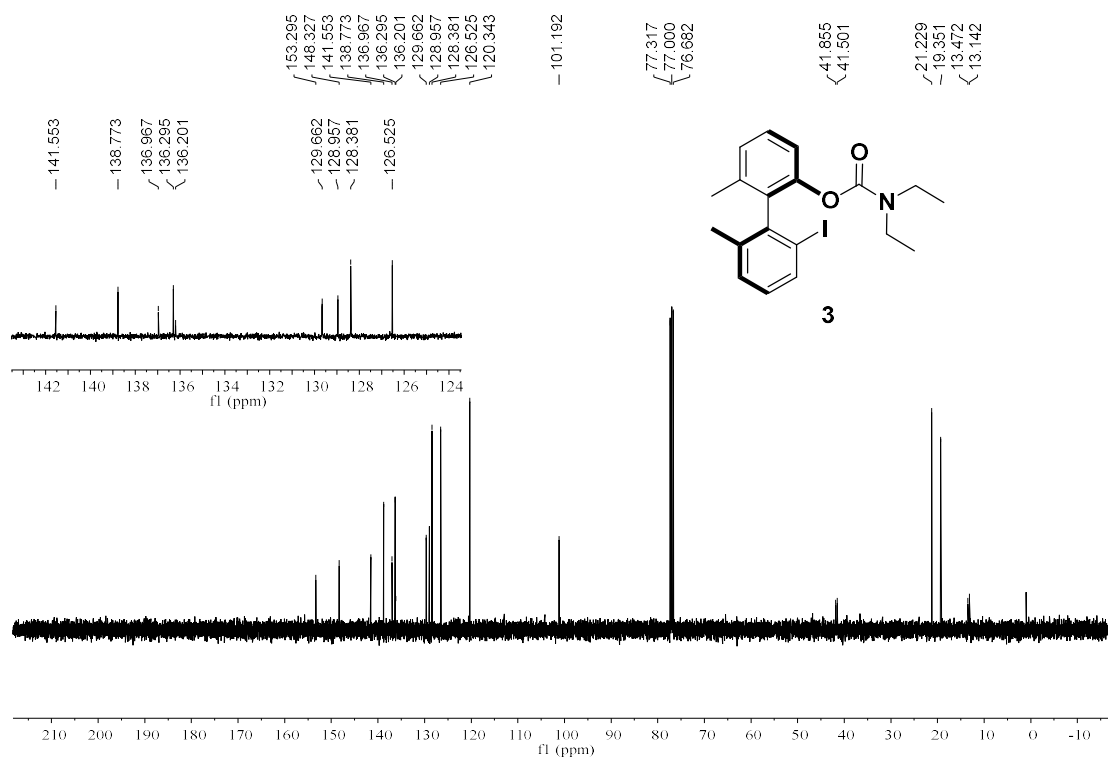

Figure S2. <sup>13</sup>C NMR Spectrum of 3

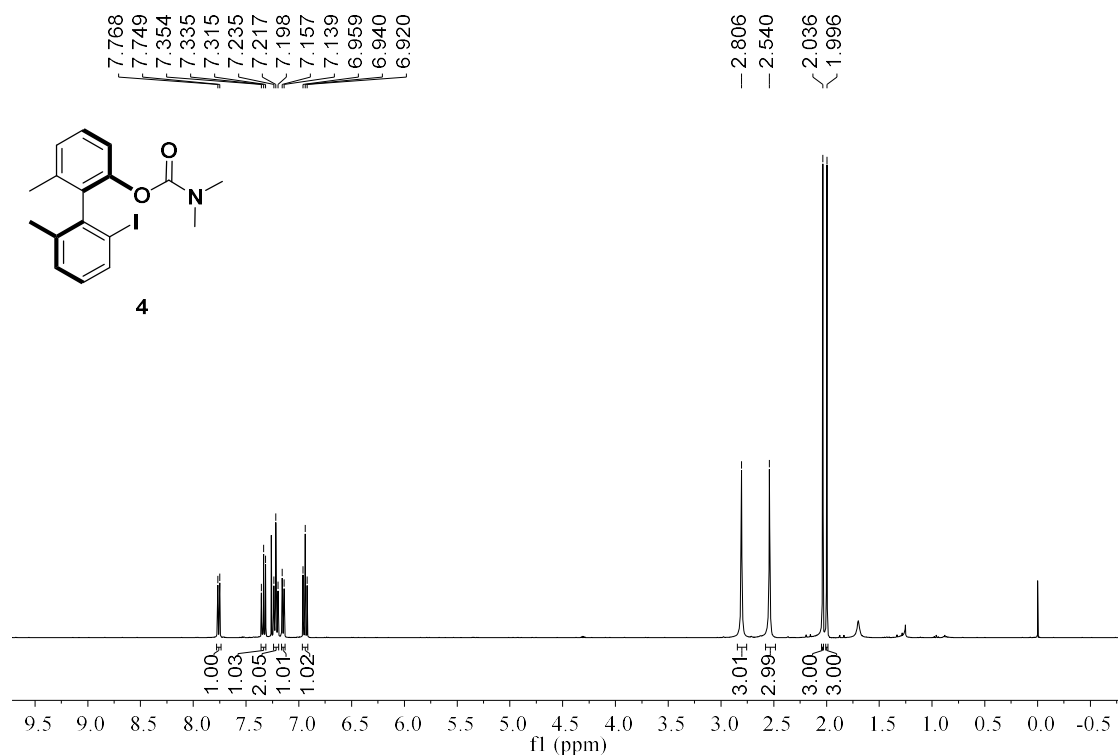

**Figure S3.** <sup>1</sup>H NMR Spectrum of **4**

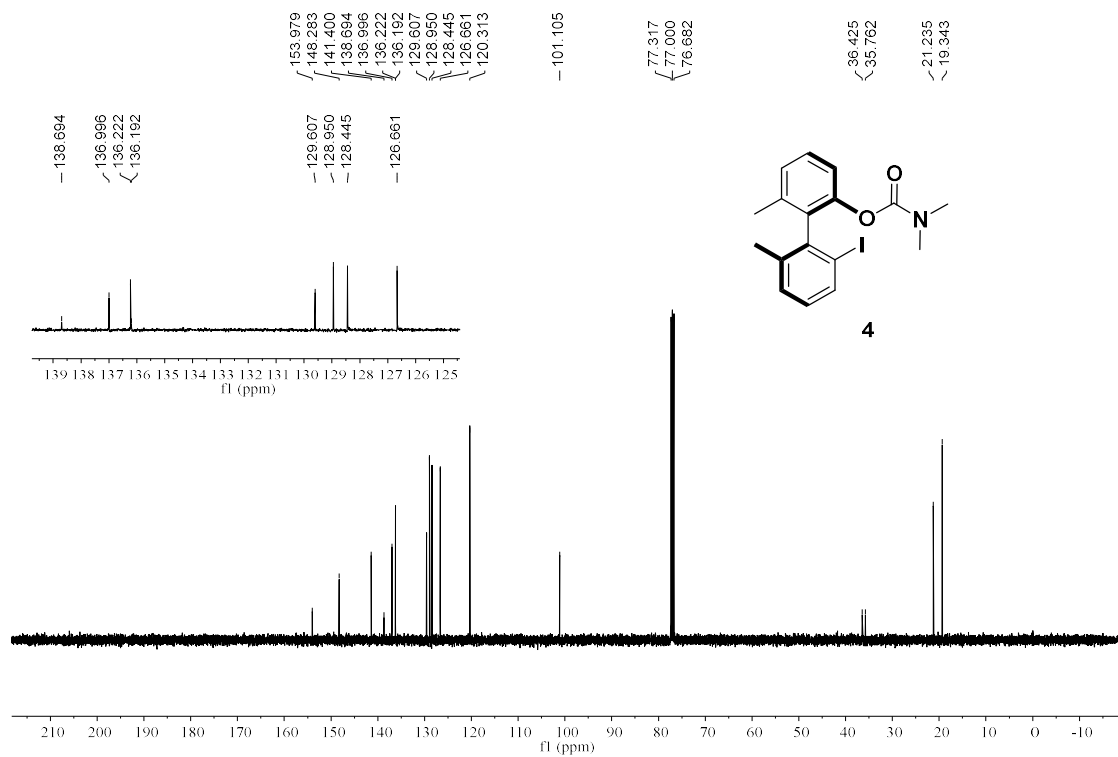

**Figure S4.** <sup>13</sup>C NMR Spectrum of **4**

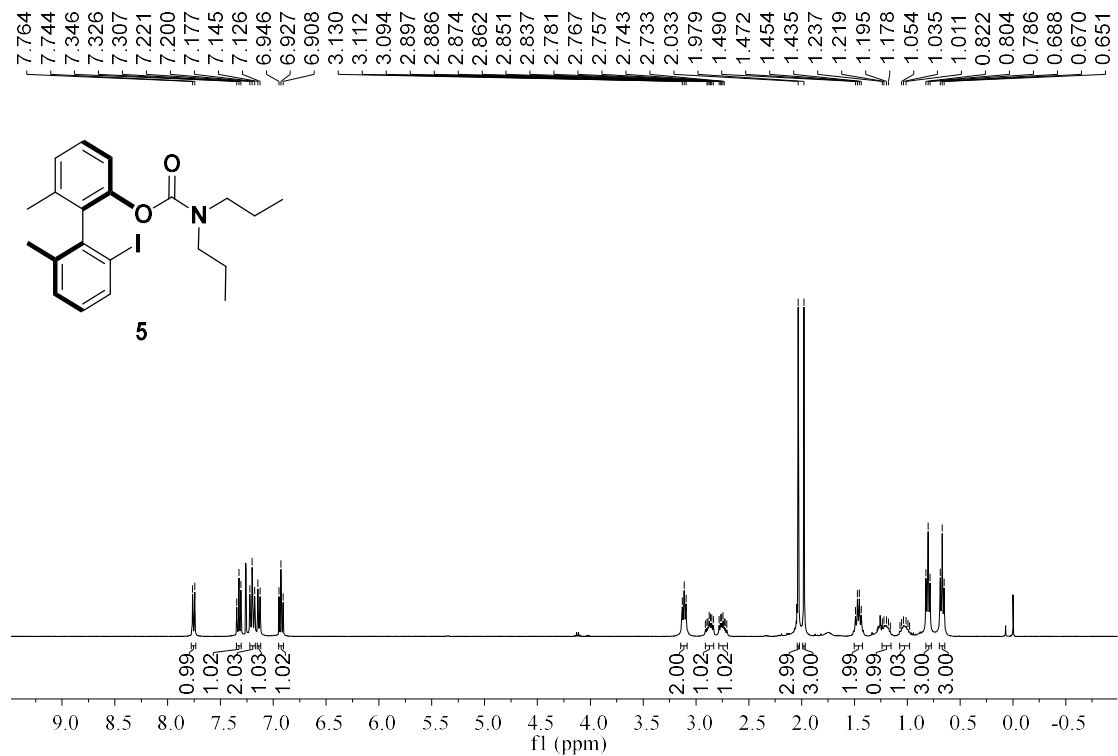

Figure S5. <sup>1</sup>H NMR Spectrum of **5**

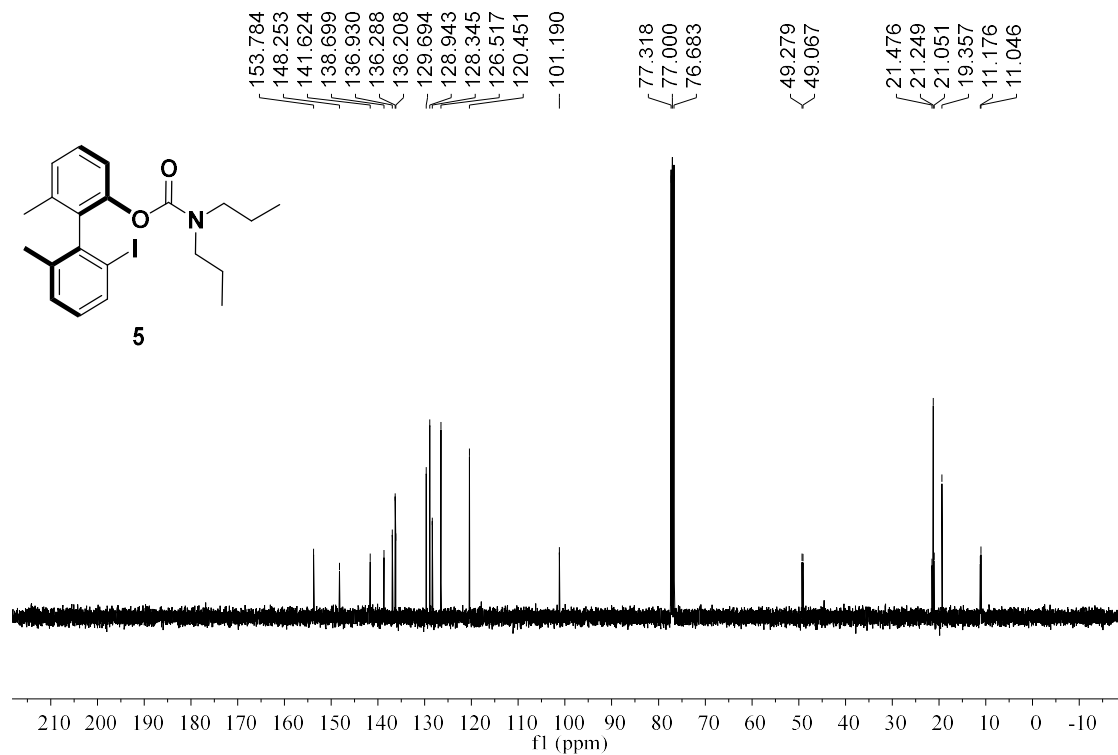

Figure S6. <sup>13</sup>C NMR Spectrum of **5**

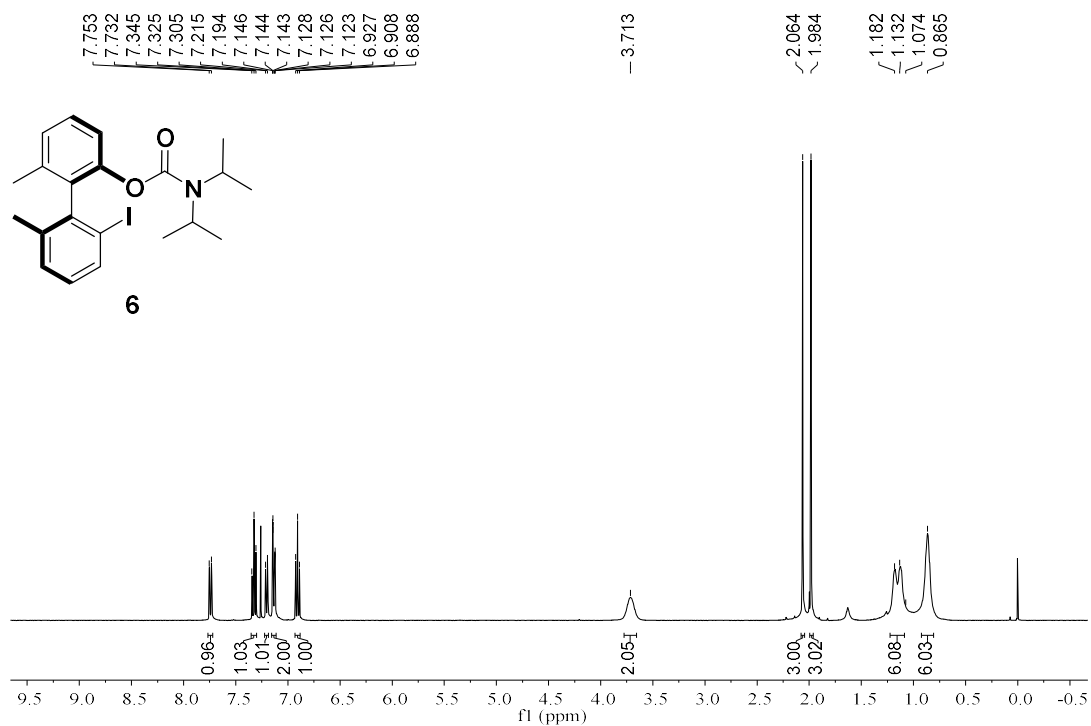

Figure S7. <sup>1</sup>H NMR Spectrum of **6**

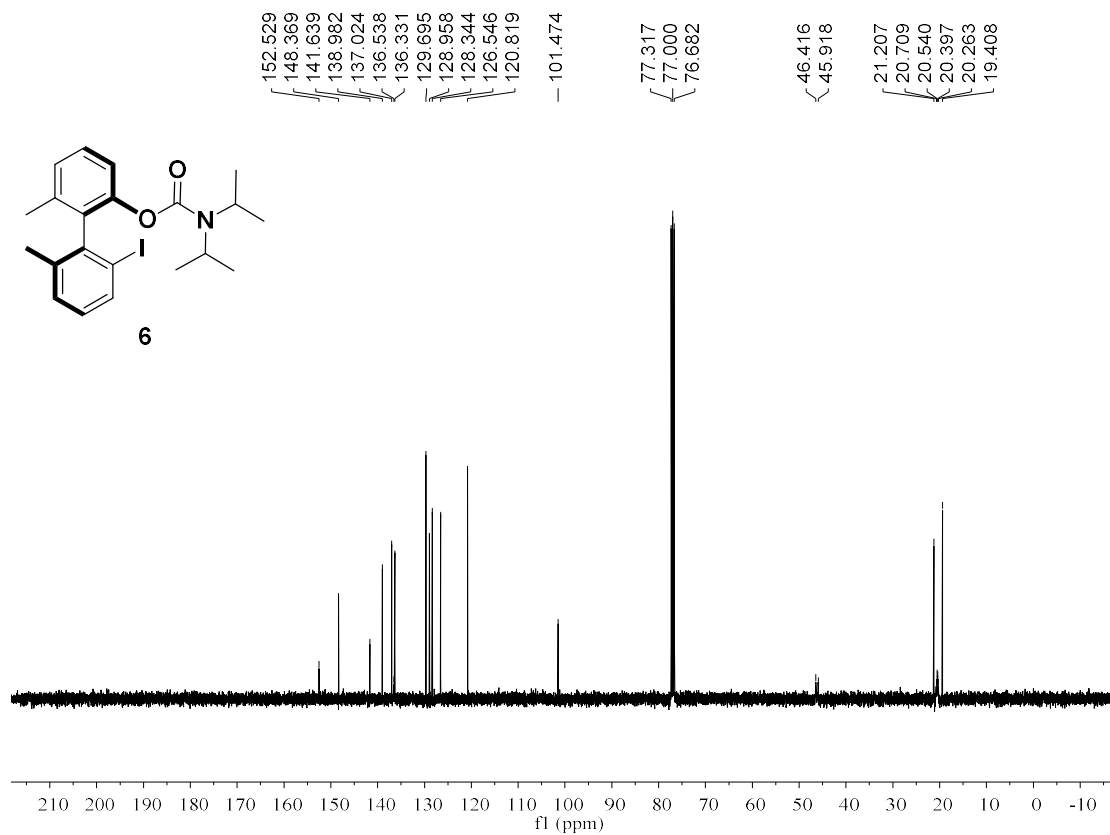

Figure S8. <sup>13</sup>C NMR Spectrum of **6**

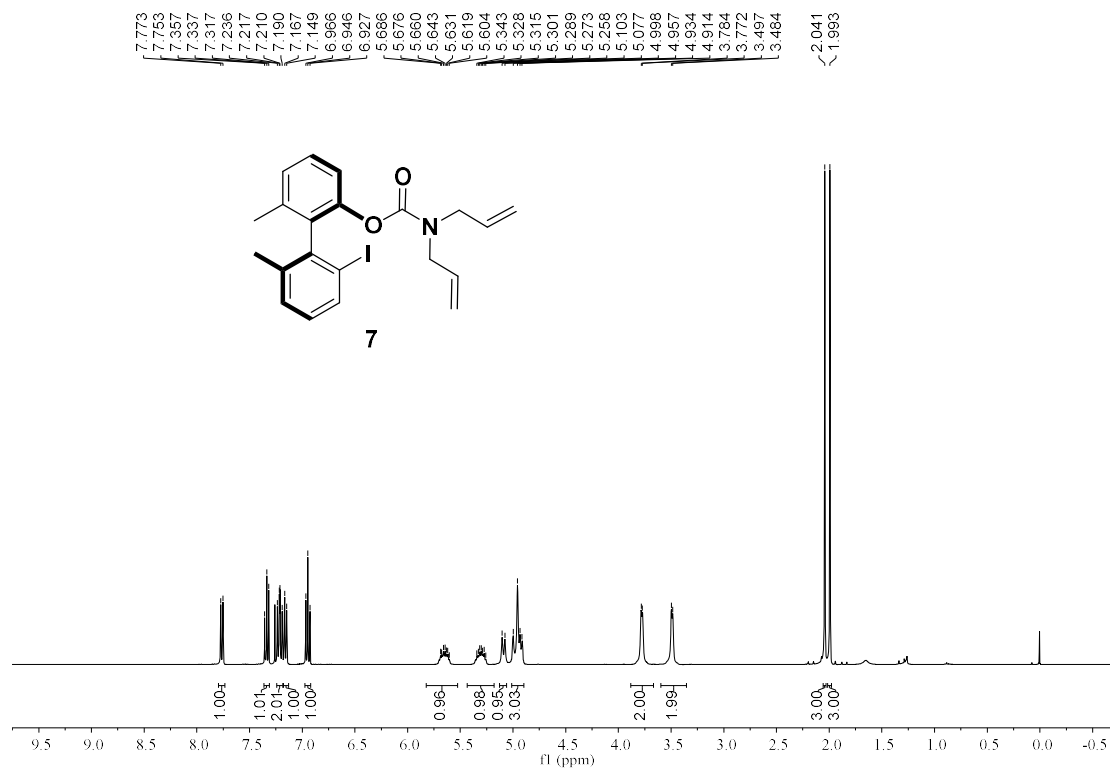

Figure S9. <sup>1</sup>H NMR Spectrum of 7

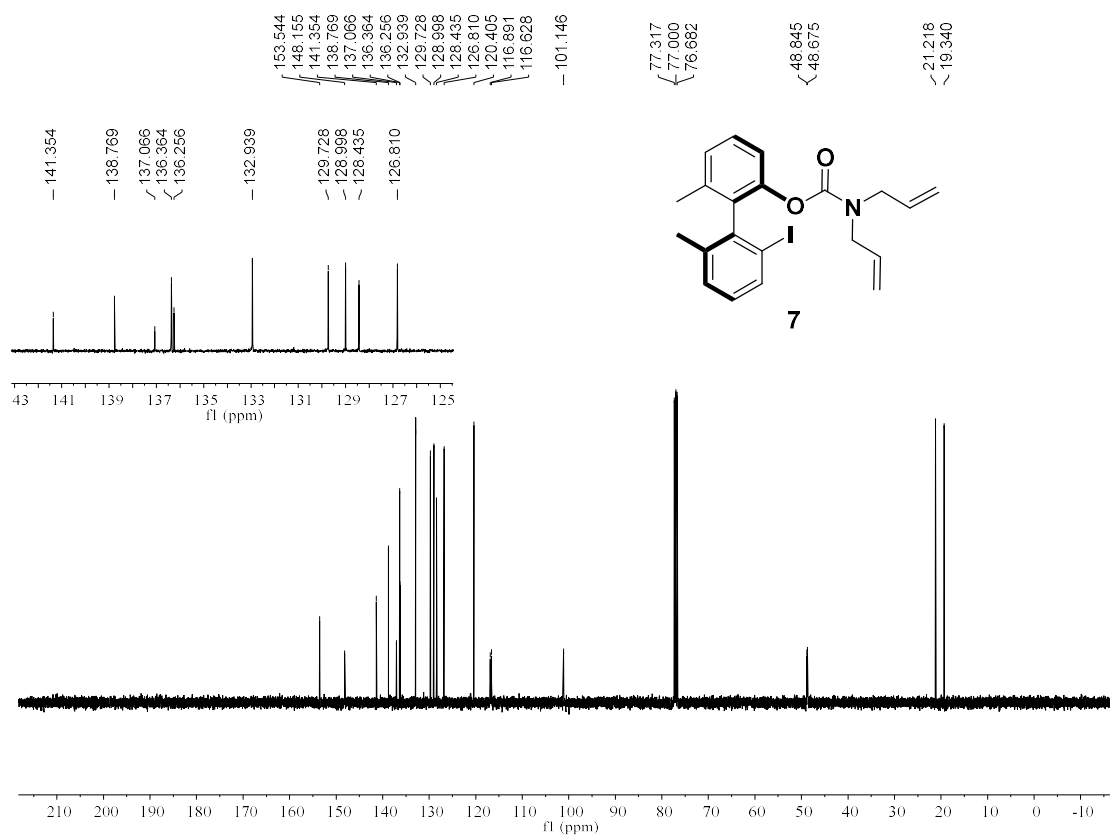

Figure S10. <sup>13</sup>C NMR Spectrum of 7

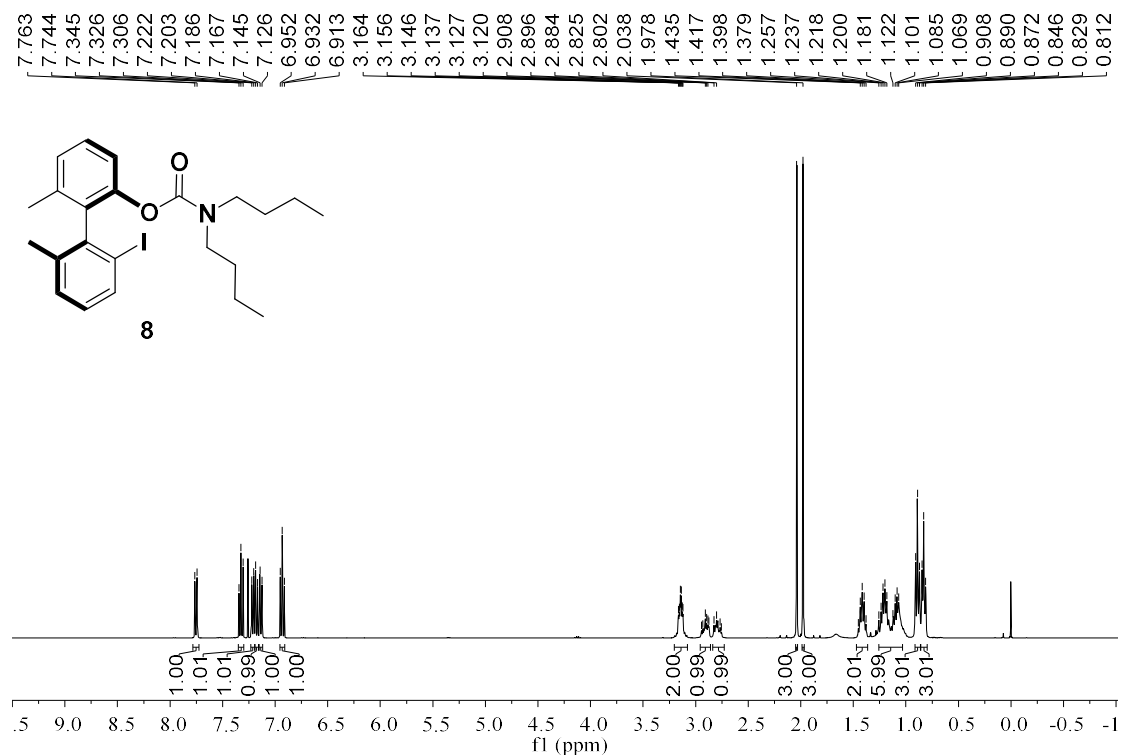

Figure S11. <sup>1</sup>H NMR Spectrum of **8**

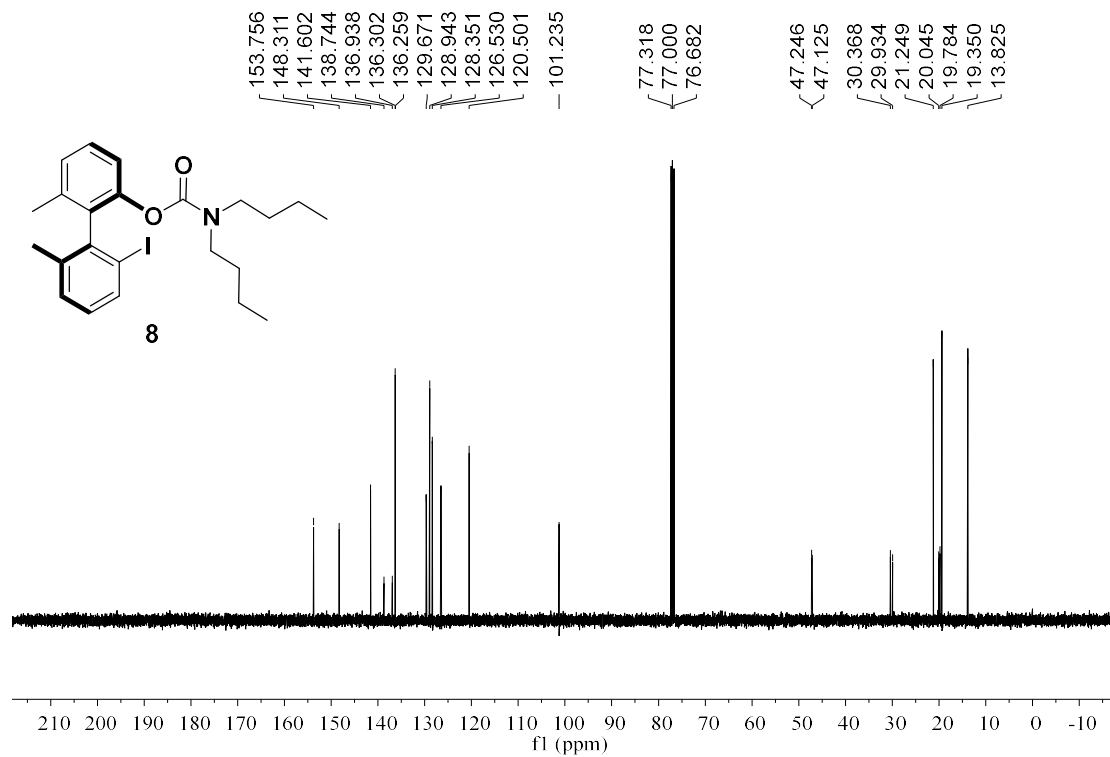

Figure S12. <sup>13</sup>C NMR Spectrum of **8**

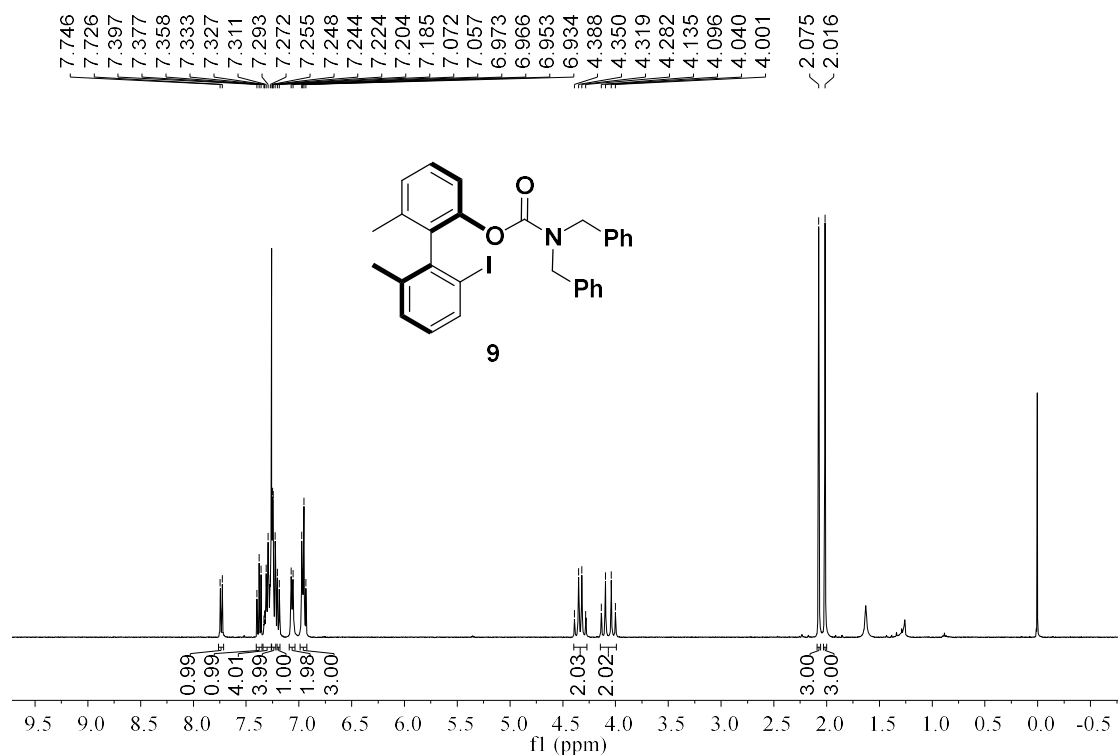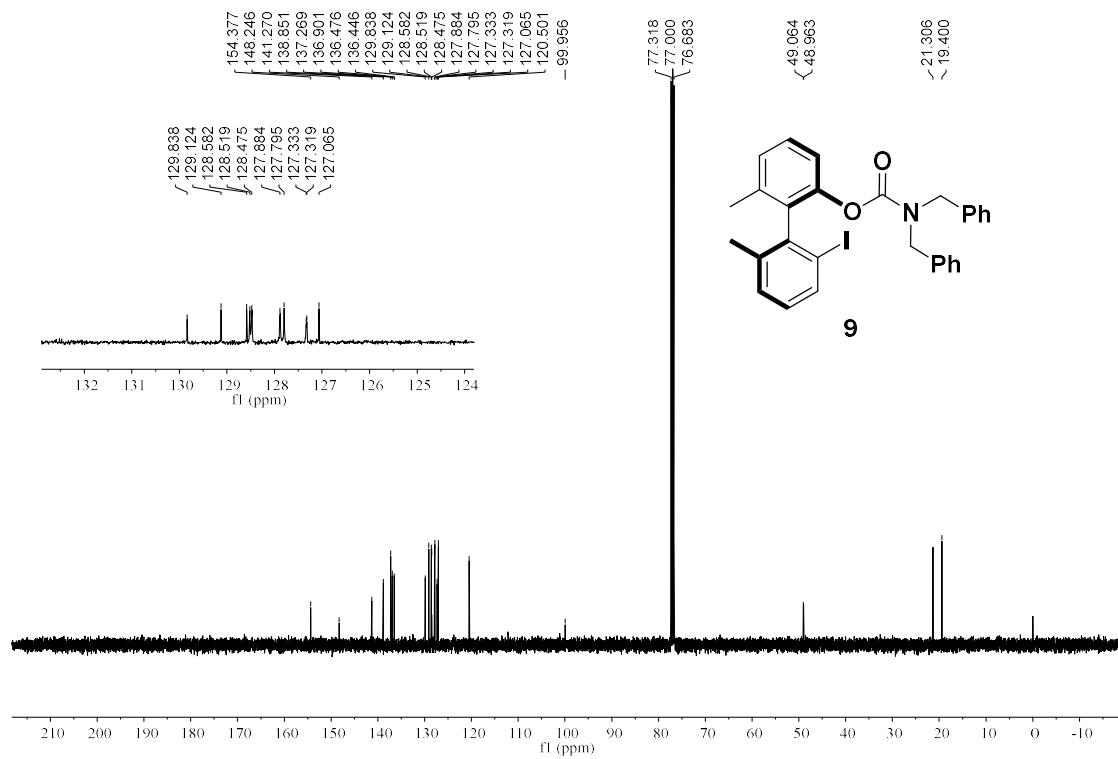



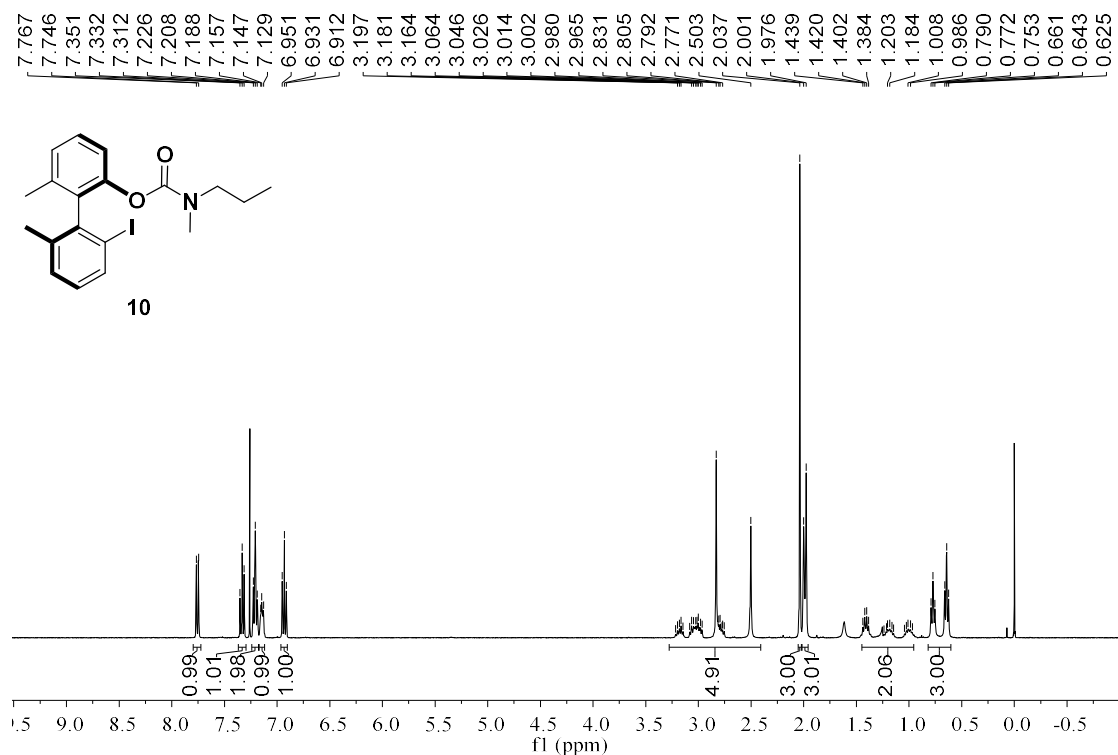

Figure S15. <sup>1</sup>H NMR Spectrum of **10**

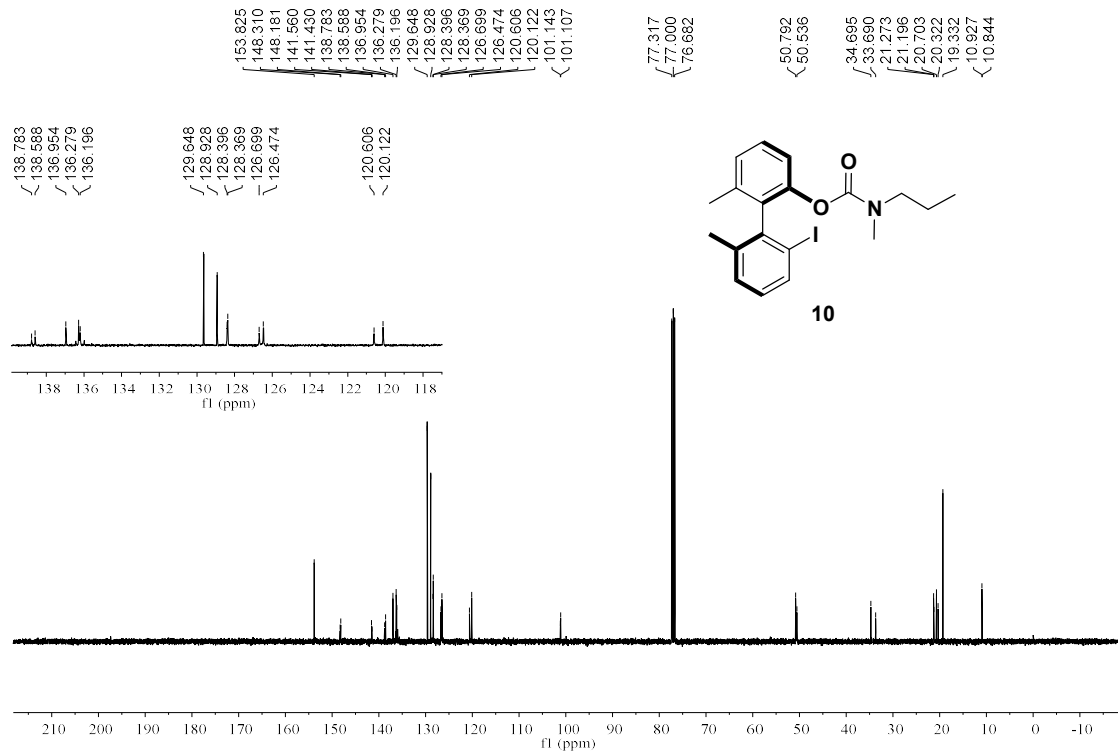

Figure S16. <sup>13</sup>C NMR Spectrum of **10**

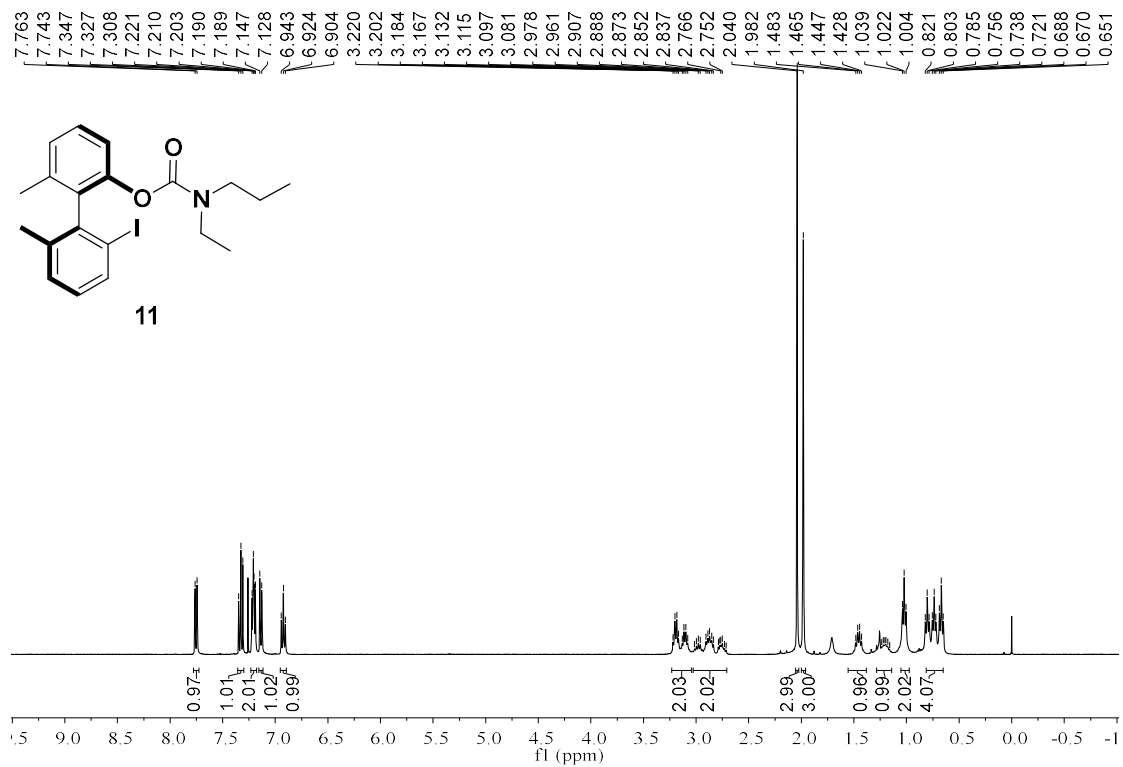

Figure S17. <sup>1</sup>H NMR Spectrum of **11**

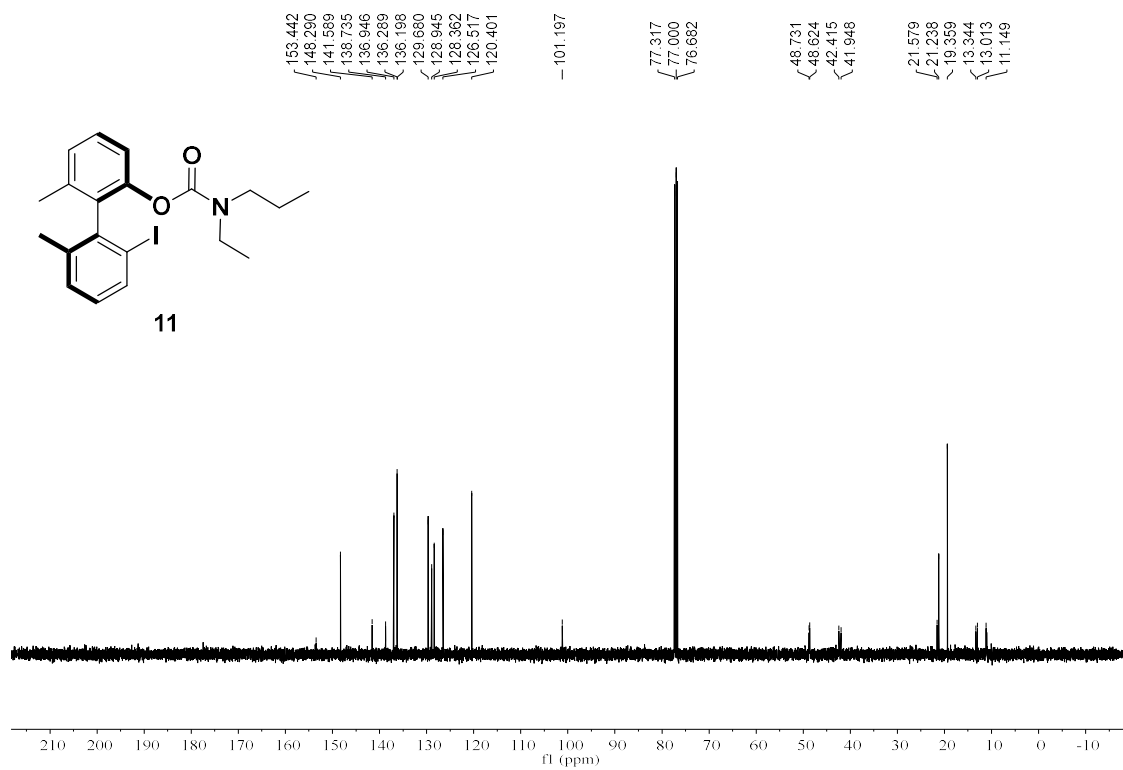

Figure S18. <sup>13</sup>C NMR Spectrum of **11**

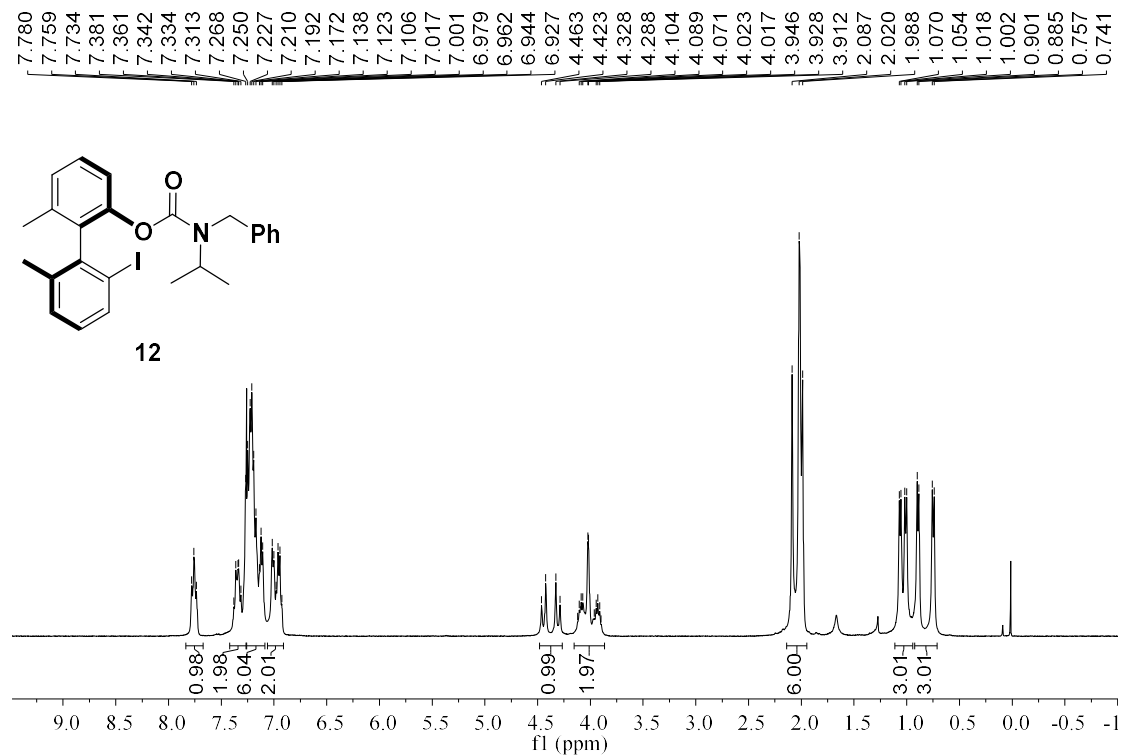

Figure S19. <sup>1</sup>H NMR Spectrum of 12

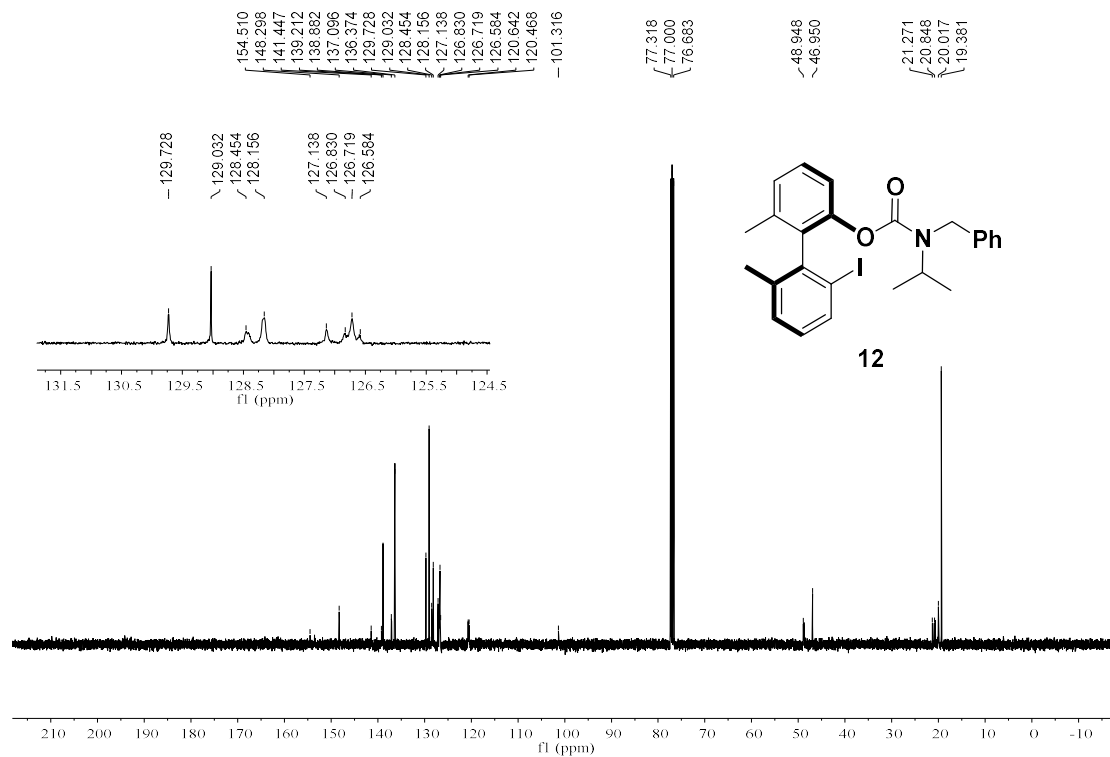

Figure S20. <sup>13</sup>C NMR Spectrum of 12

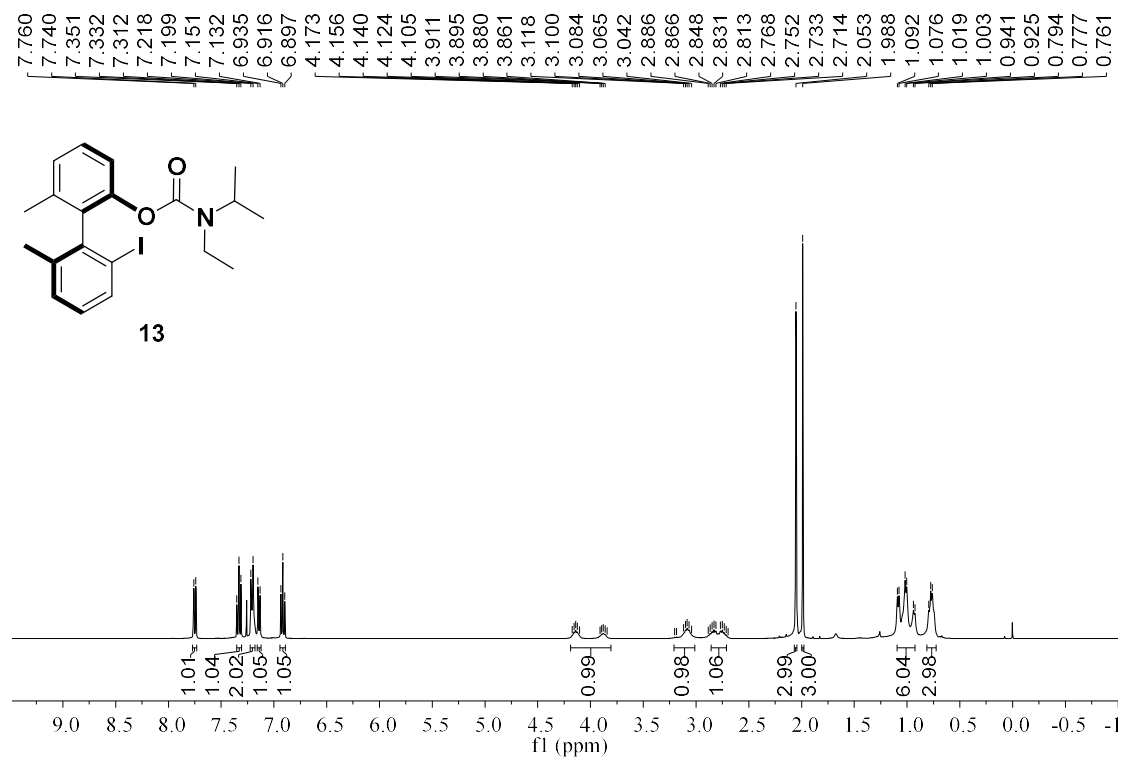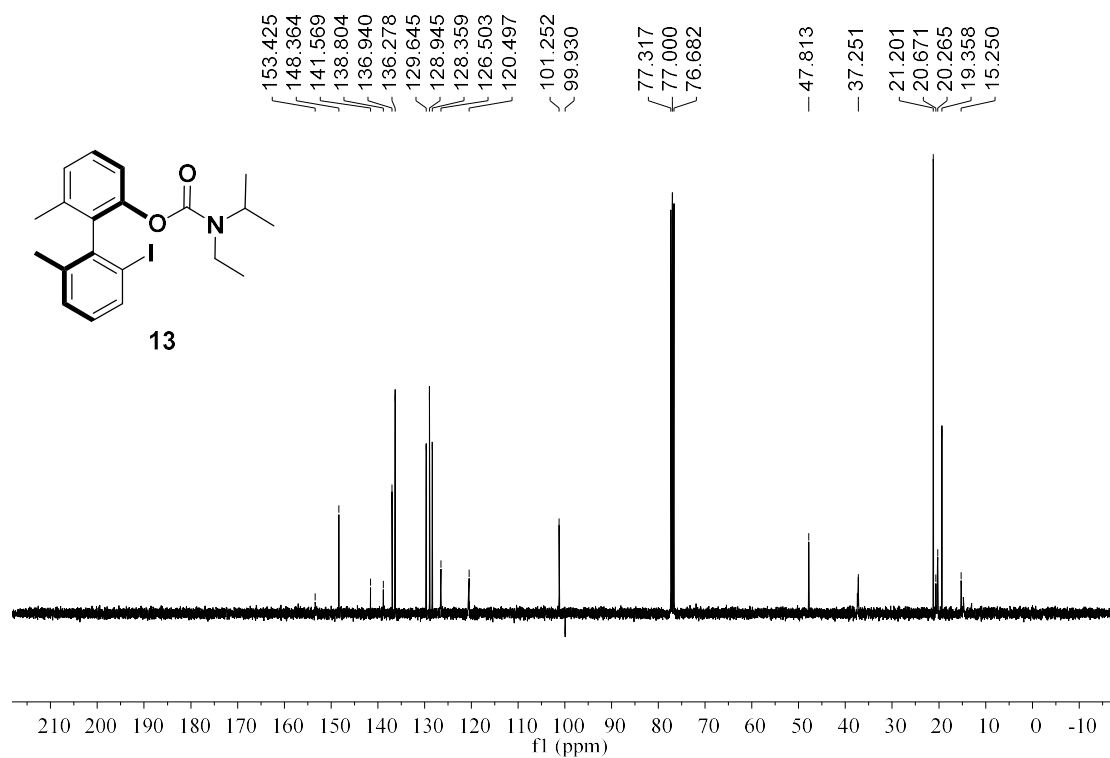

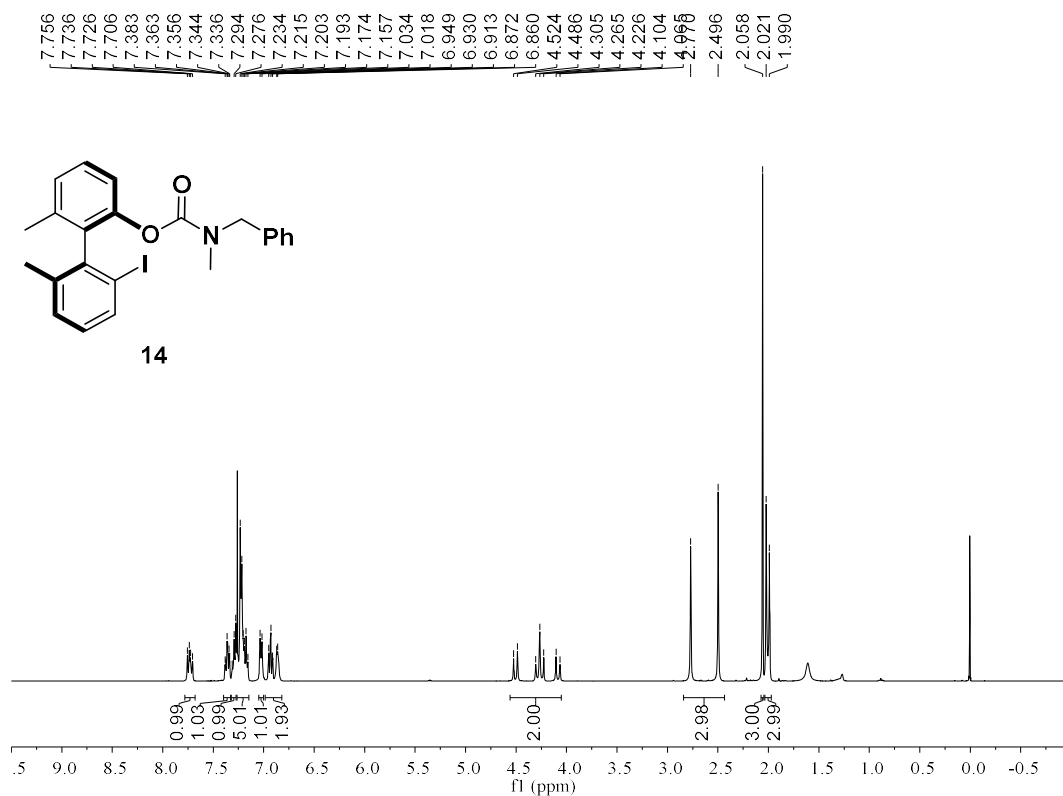

Figure S23. <sup>1</sup>H NMR Spectrum of 14

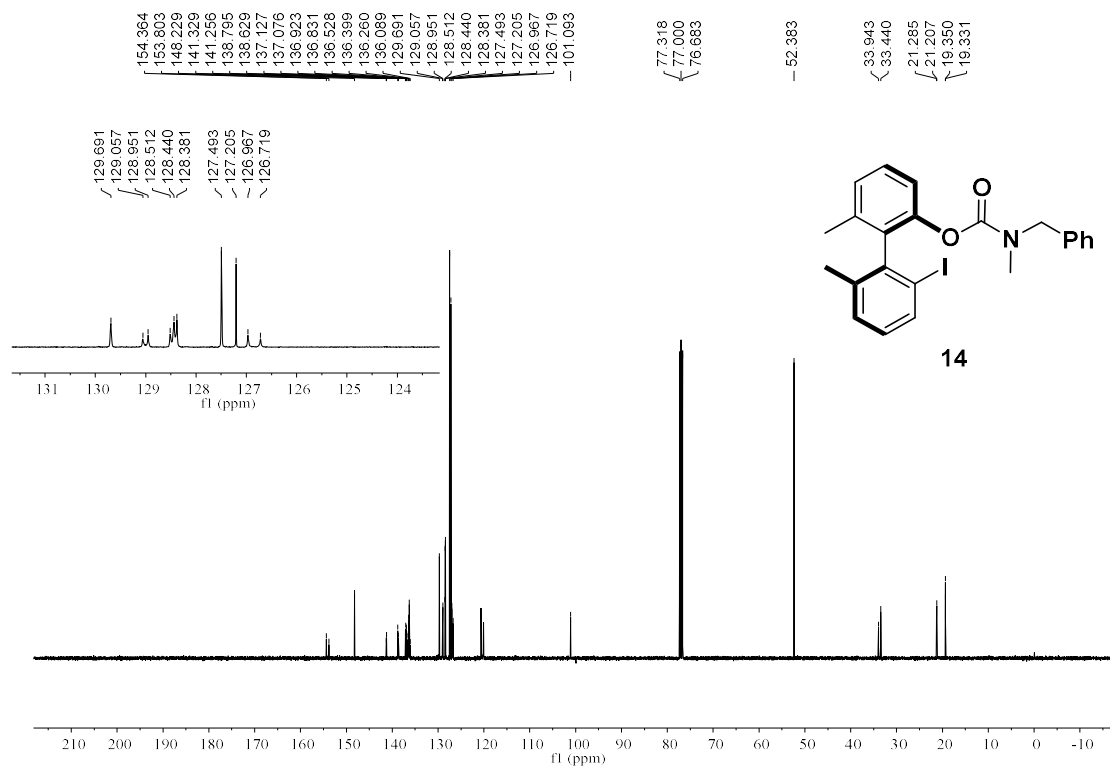

Figure S24. <sup>13</sup>C NMR Spectrum of 14

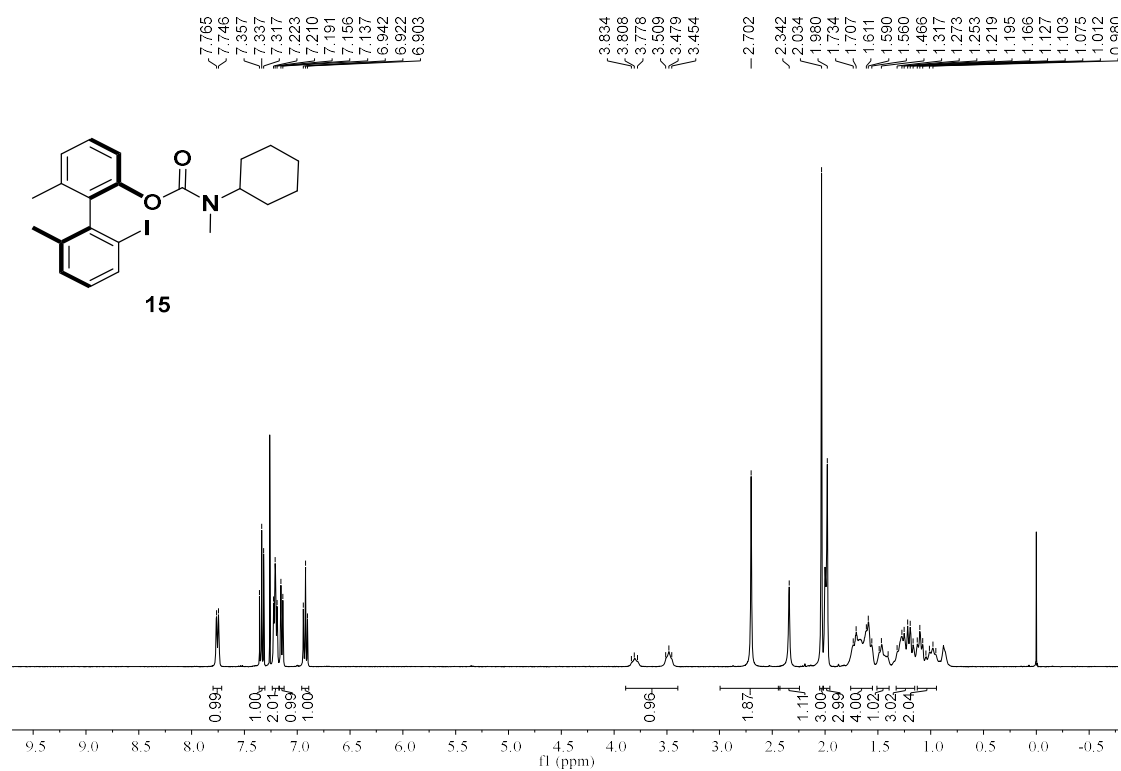

Figure S25. <sup>1</sup>H NMR Spectrum of **15**

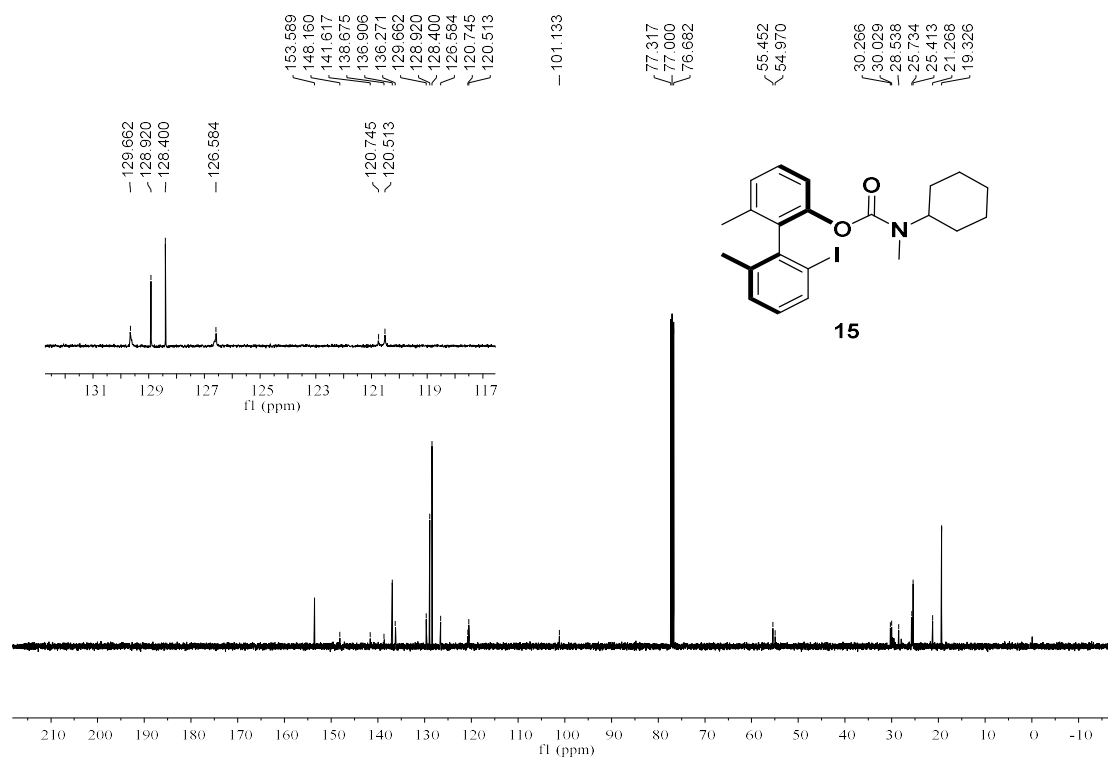

Figure S26. <sup>13</sup>C NMR Spectrum of **15**

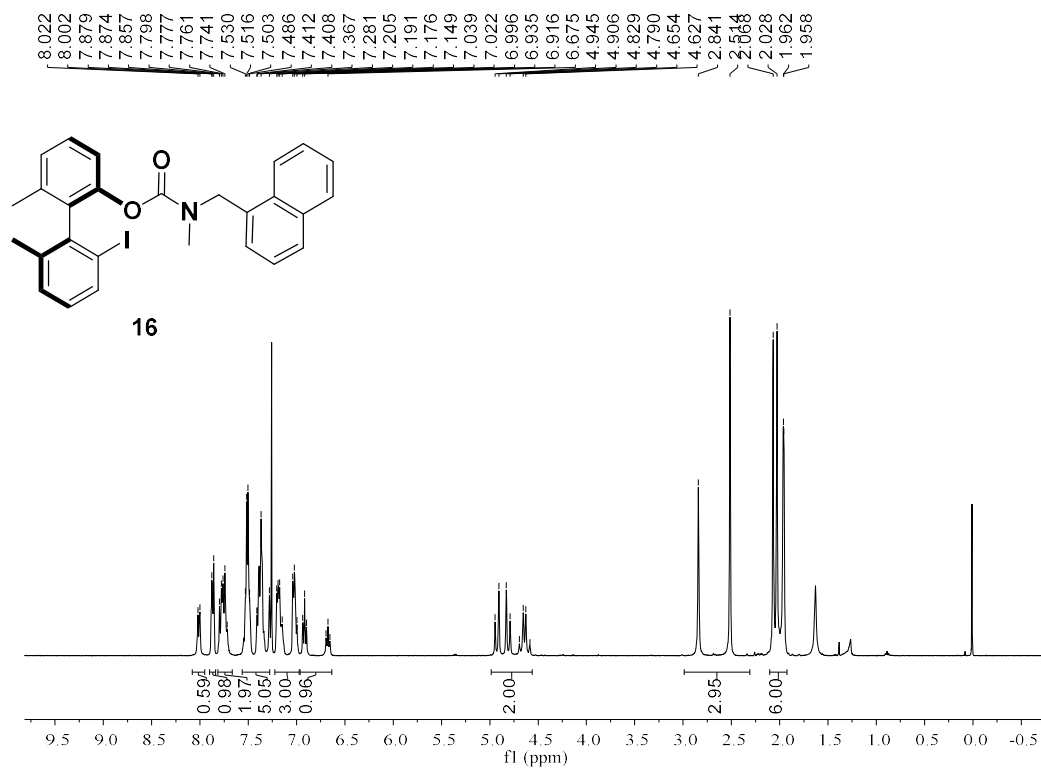

**Figure S27.**  $^1\text{H}$  NMR Spectrum of **16**

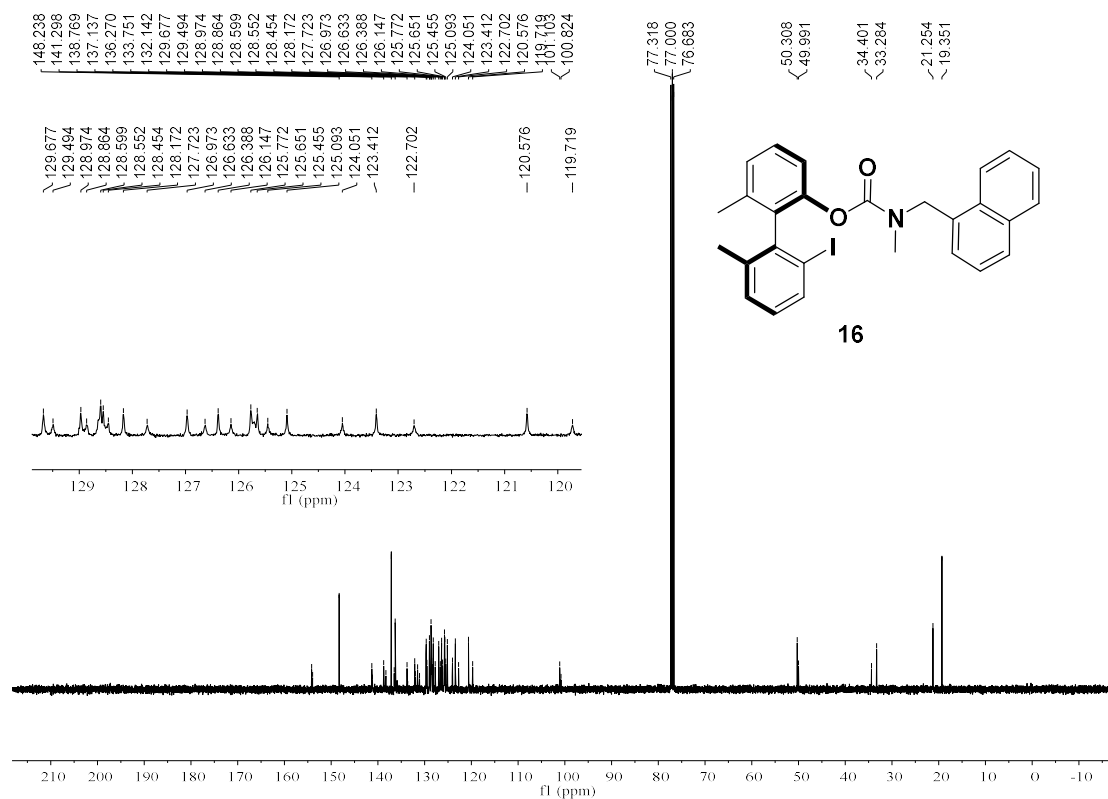

**Figure S28.**  $^{13}\text{C}$  NMR Spectrum of **16**

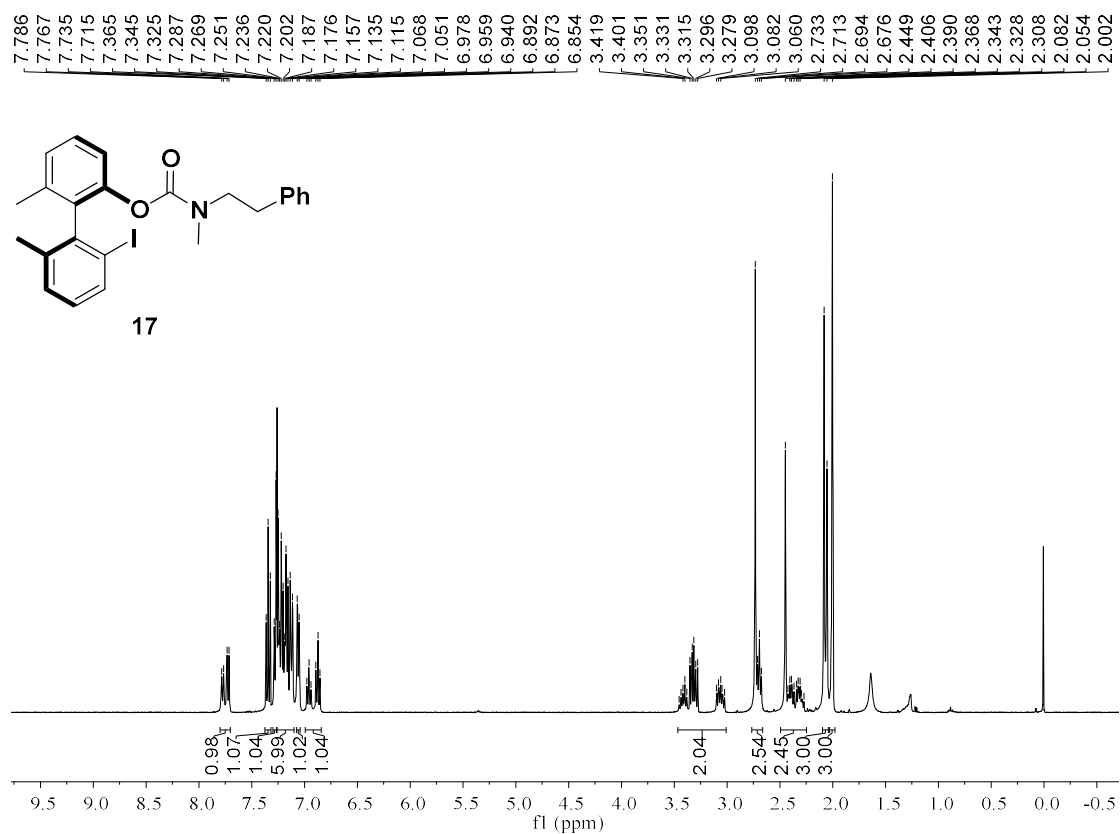

Figure S29. <sup>13</sup>C NMR Spectrum of 17

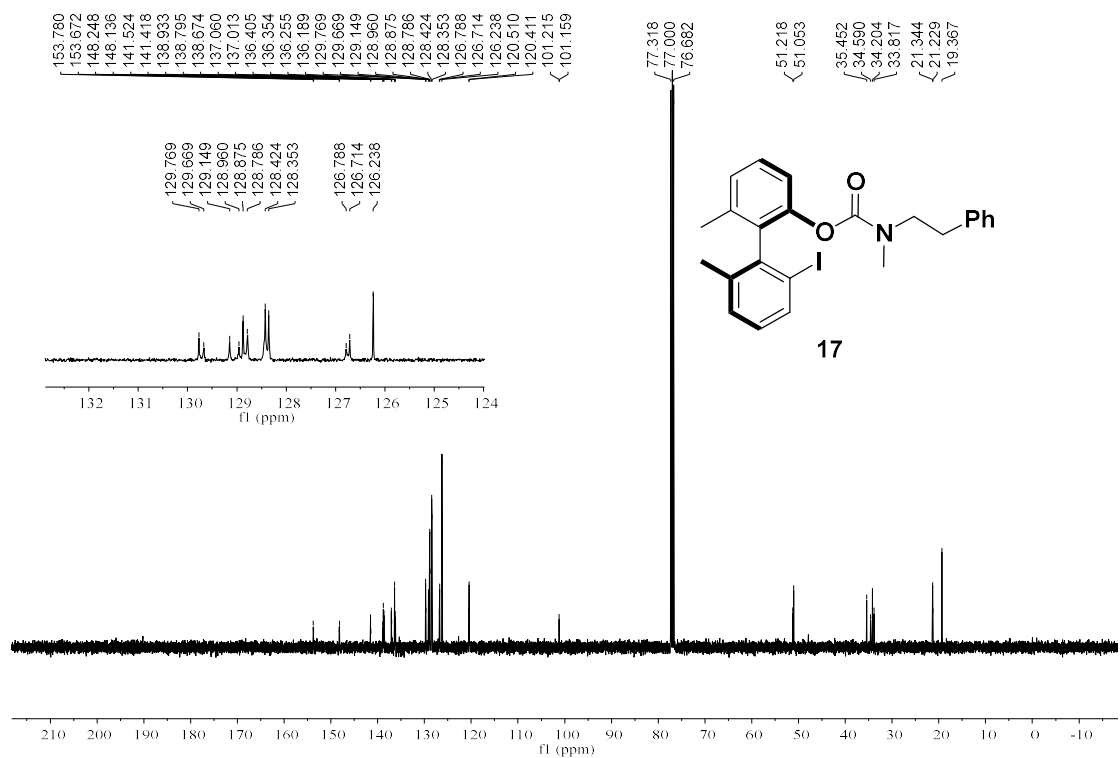

Figure S30. <sup>13</sup>C NMR Spectrum of 17



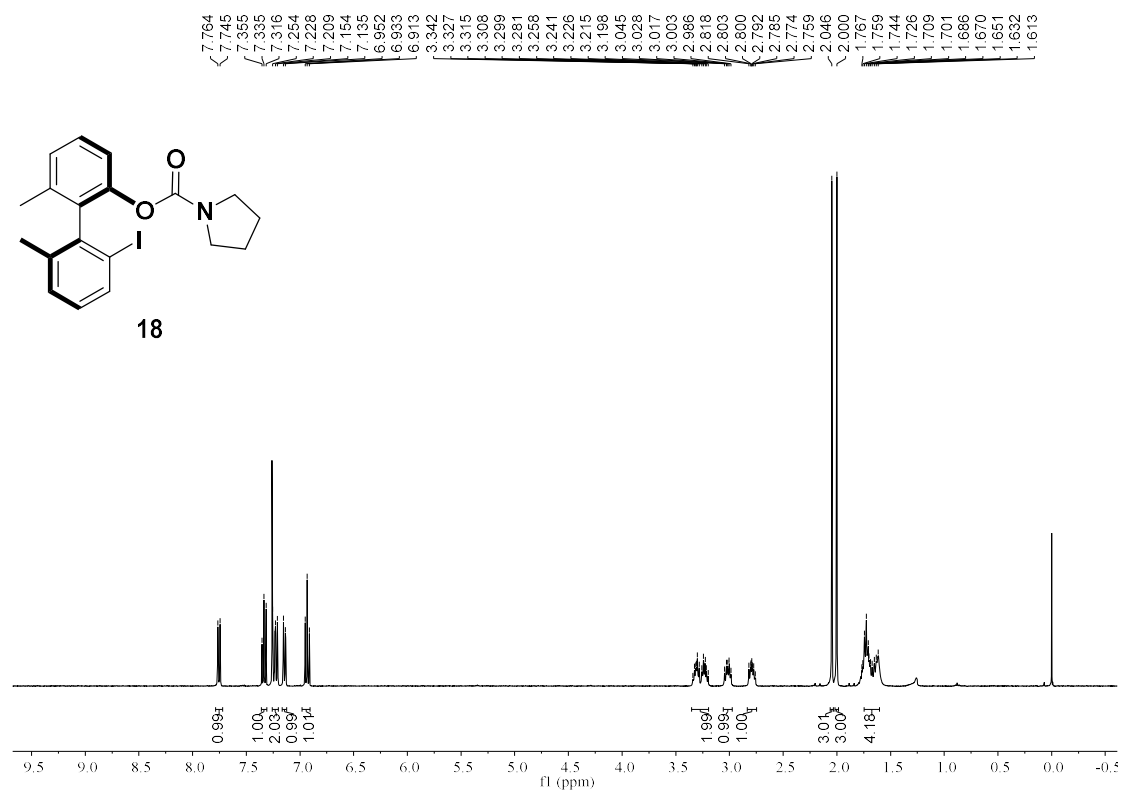

Figure S31. <sup>1</sup>H NMR Spectrum of **18**

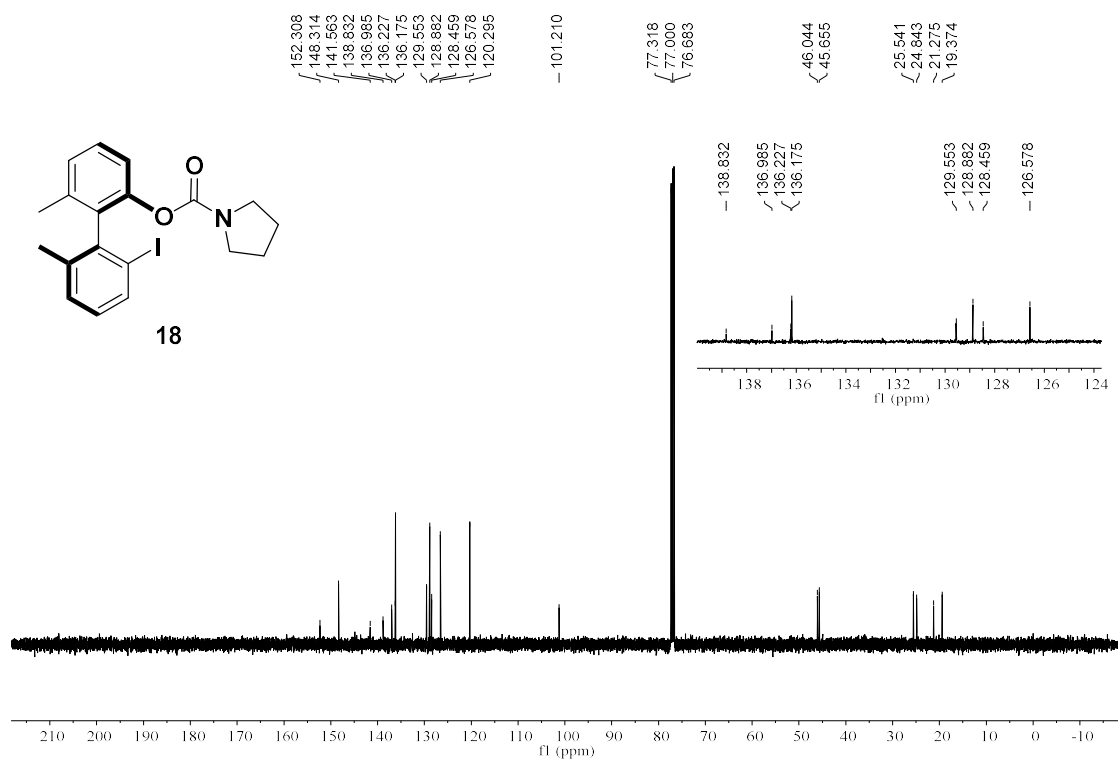

Figure S32. <sup>13</sup>C NMR Spectrum of **18**

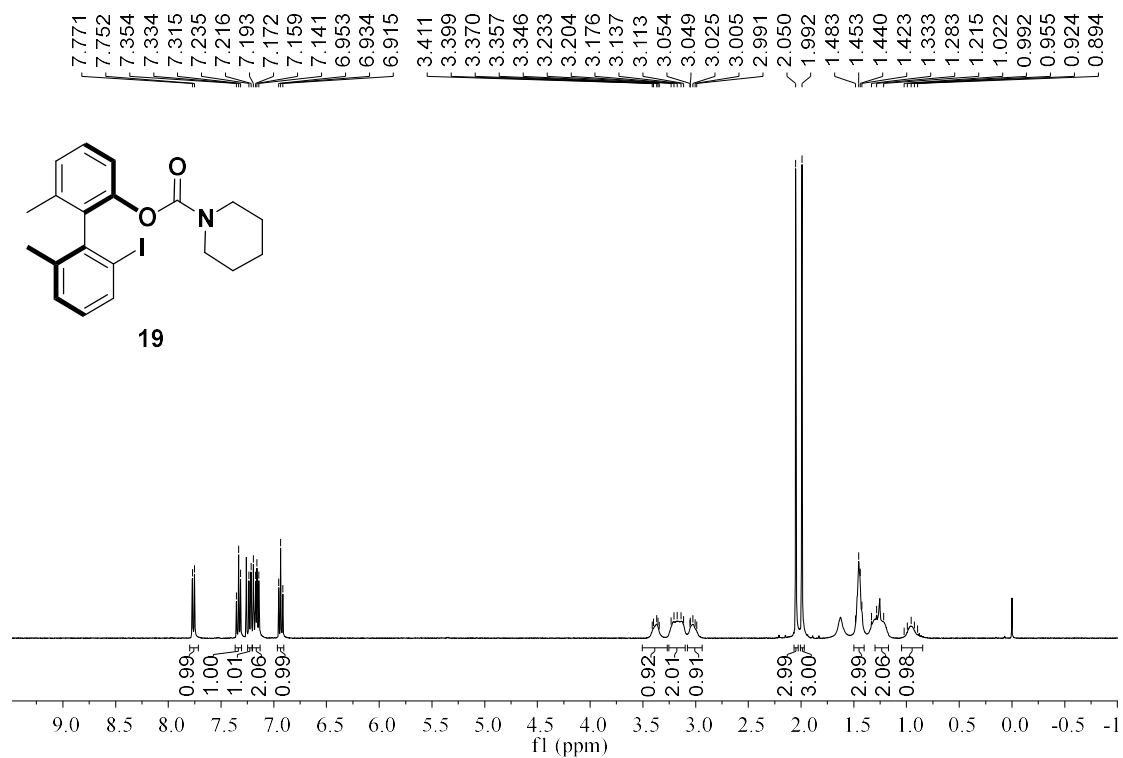

Figure S33. <sup>1</sup>H NMR Spectrum of **19**

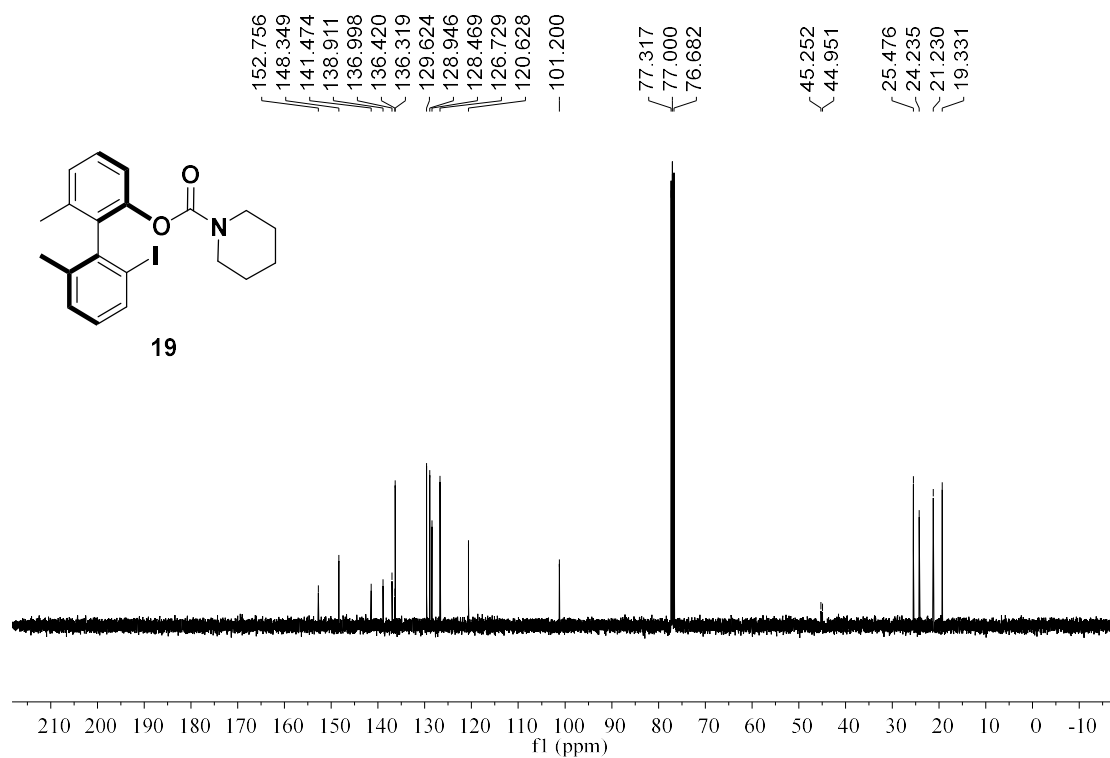

Figure S34. <sup>13</sup>C NMR Spectrum of **19**

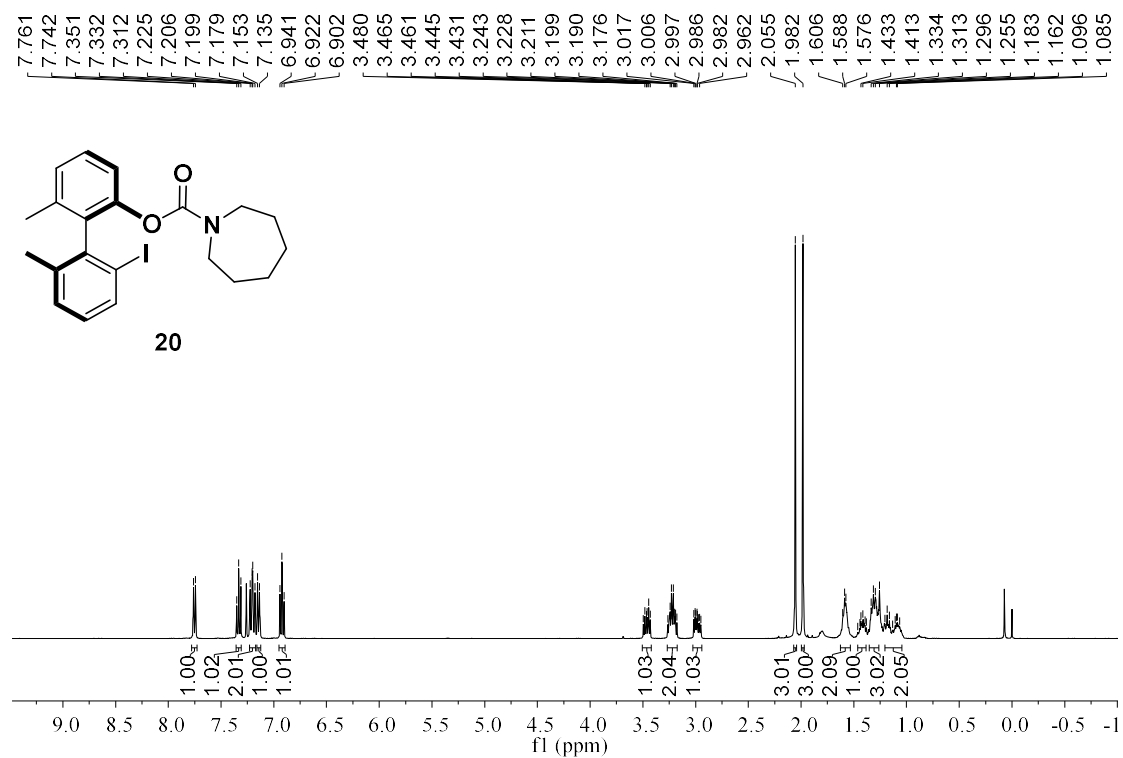

Figure S35. <sup>1</sup>H NMR Spectrum of **20**

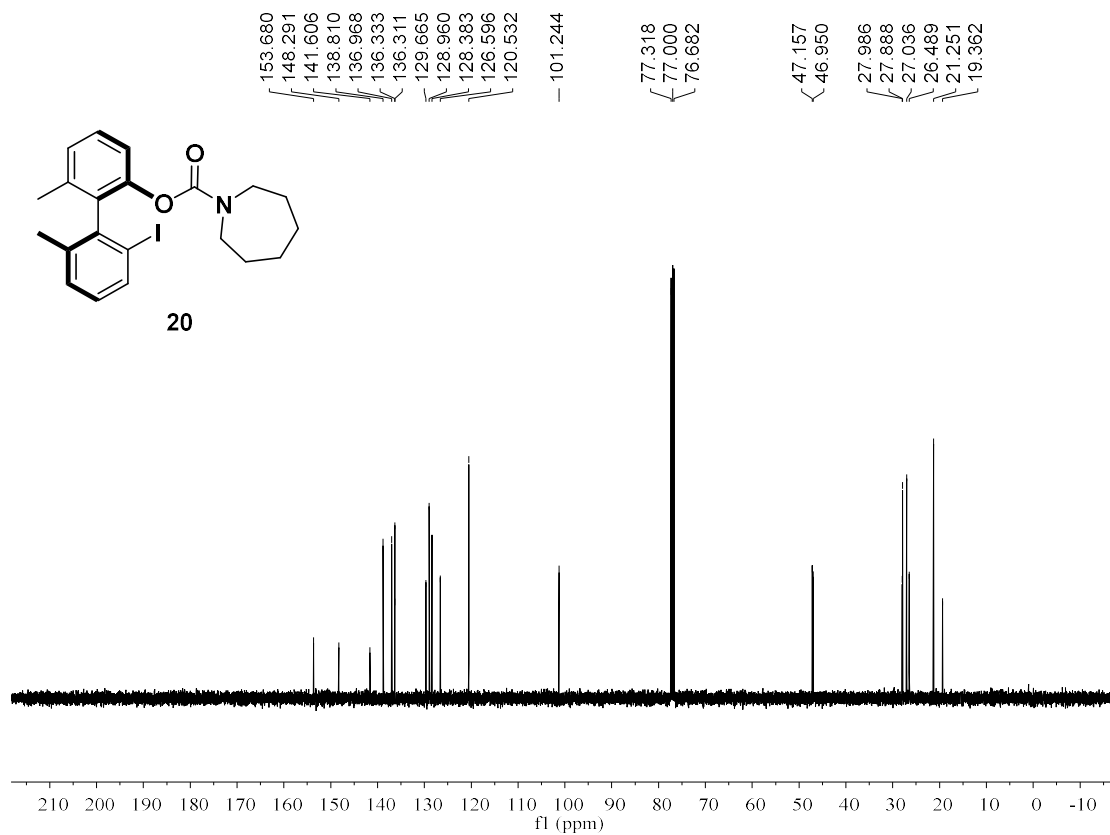

Figure S36. <sup>13</sup>C NMR Spectrum of **20**

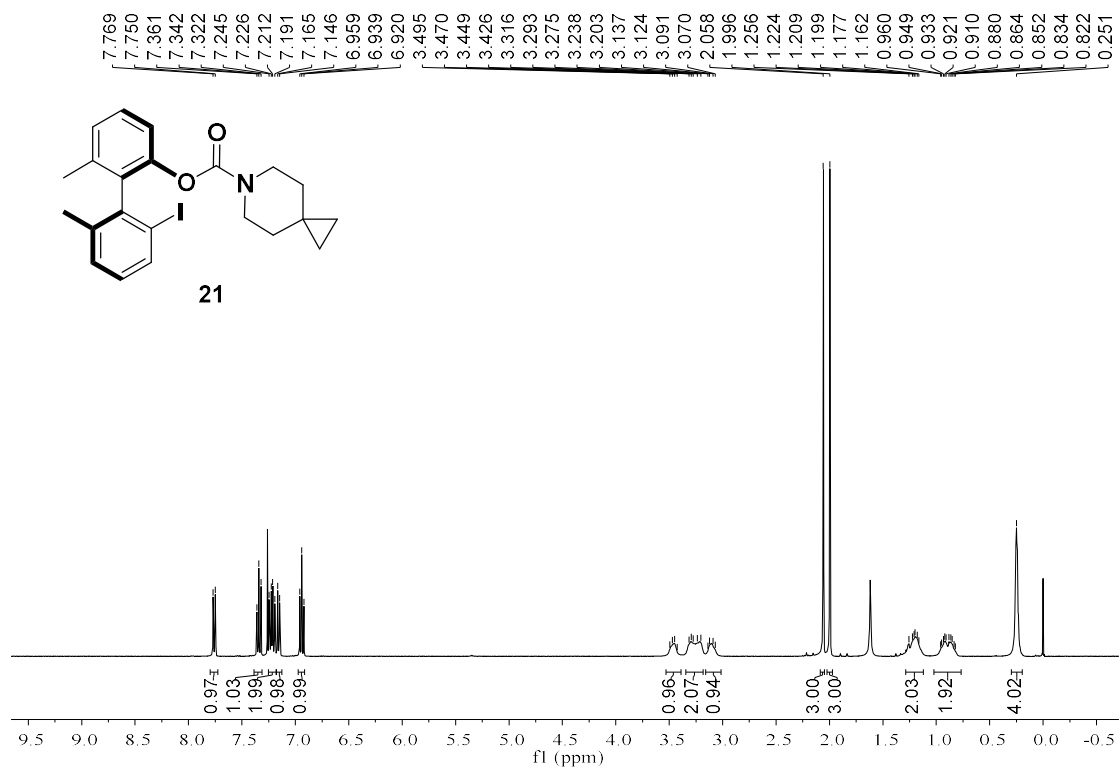

Figure S37. <sup>1</sup>H NMR Spectrum of **21**

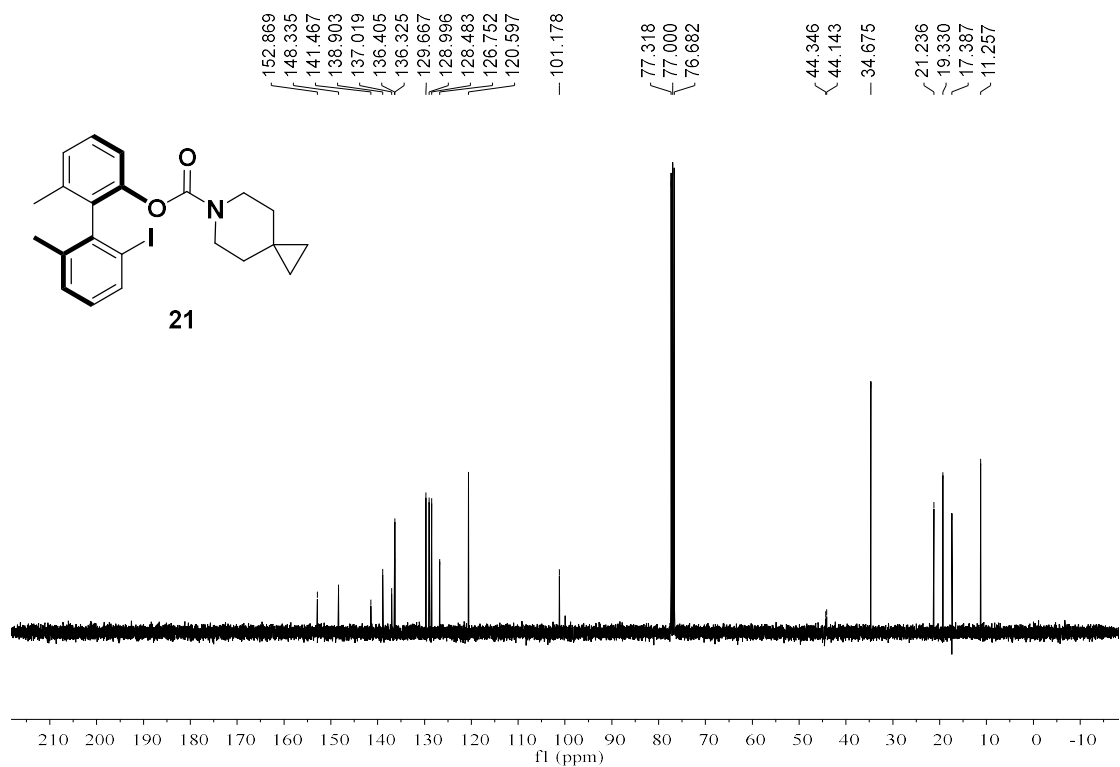

Figure S38. <sup>13</sup>C NMR Spectrum of **21**

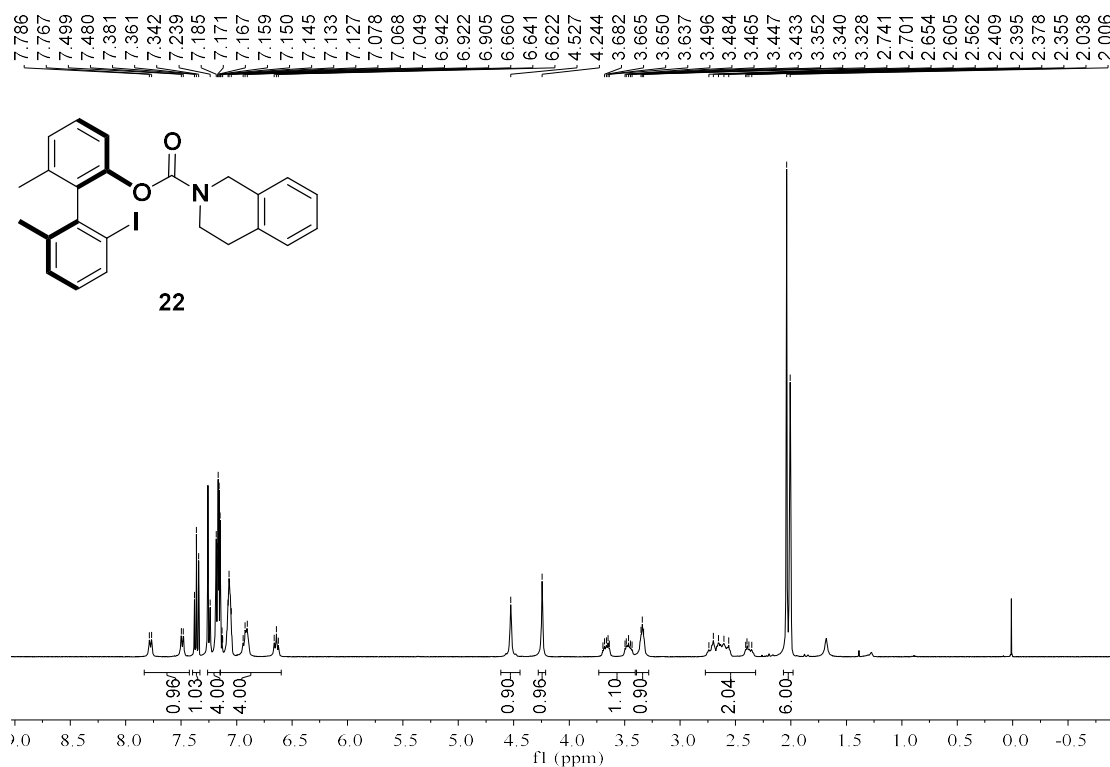

Figure S39. <sup>1</sup>H NMR Spectrum of **22**

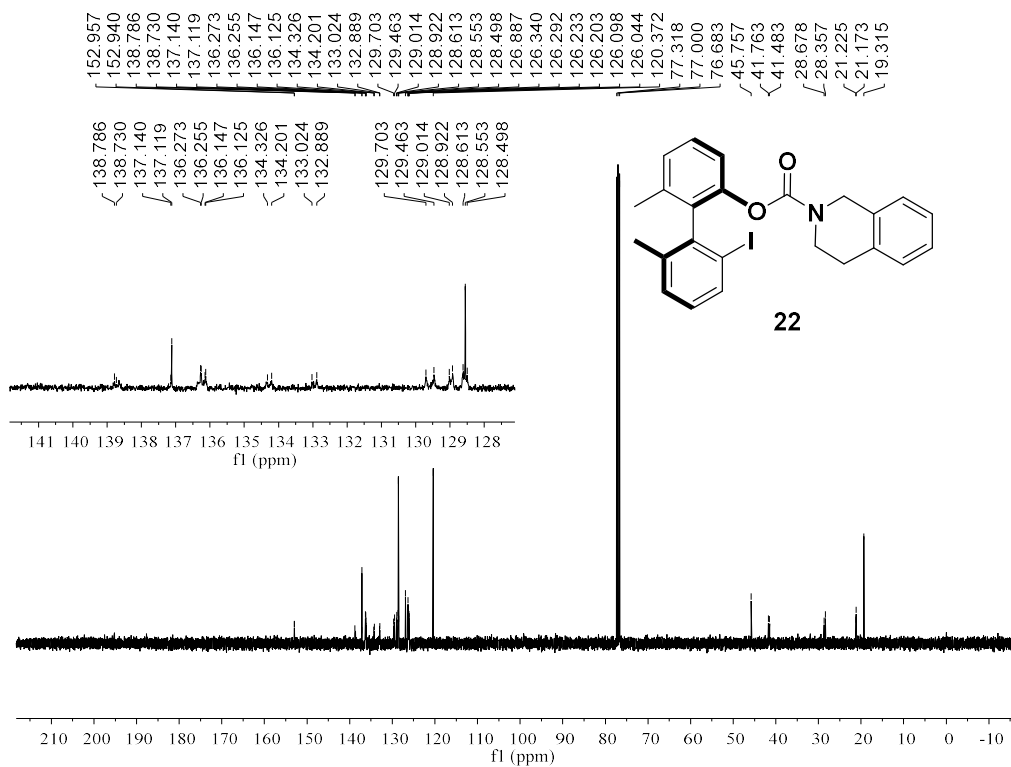

Figure S40. <sup>13</sup>C NMR Spectrum of **22**

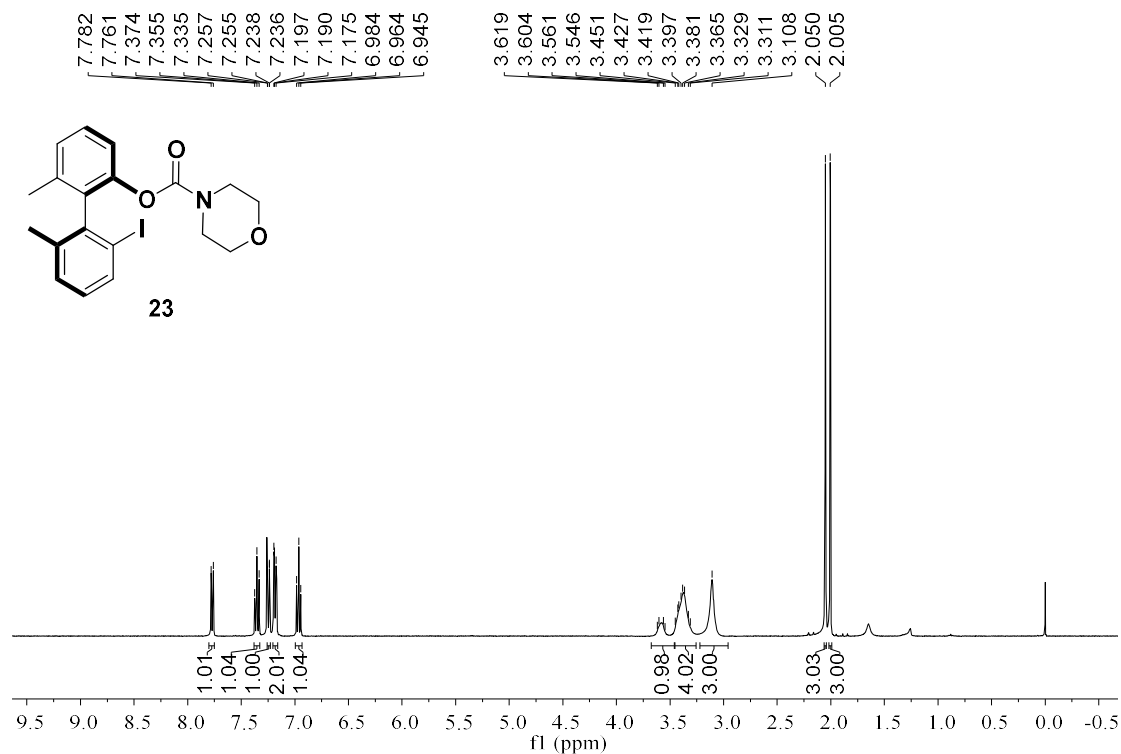

Figure S41. <sup>1</sup>H NMR Spectrum of **23**

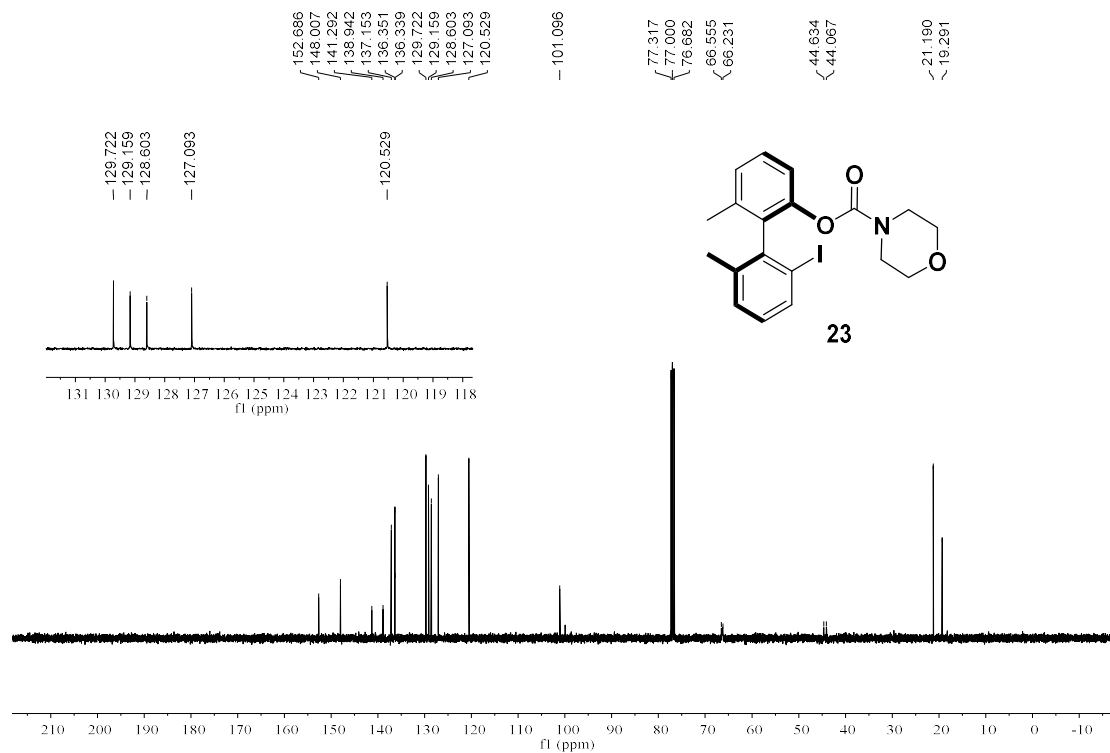

Figure S42. <sup>13</sup>C NMR Spectrum of **23**

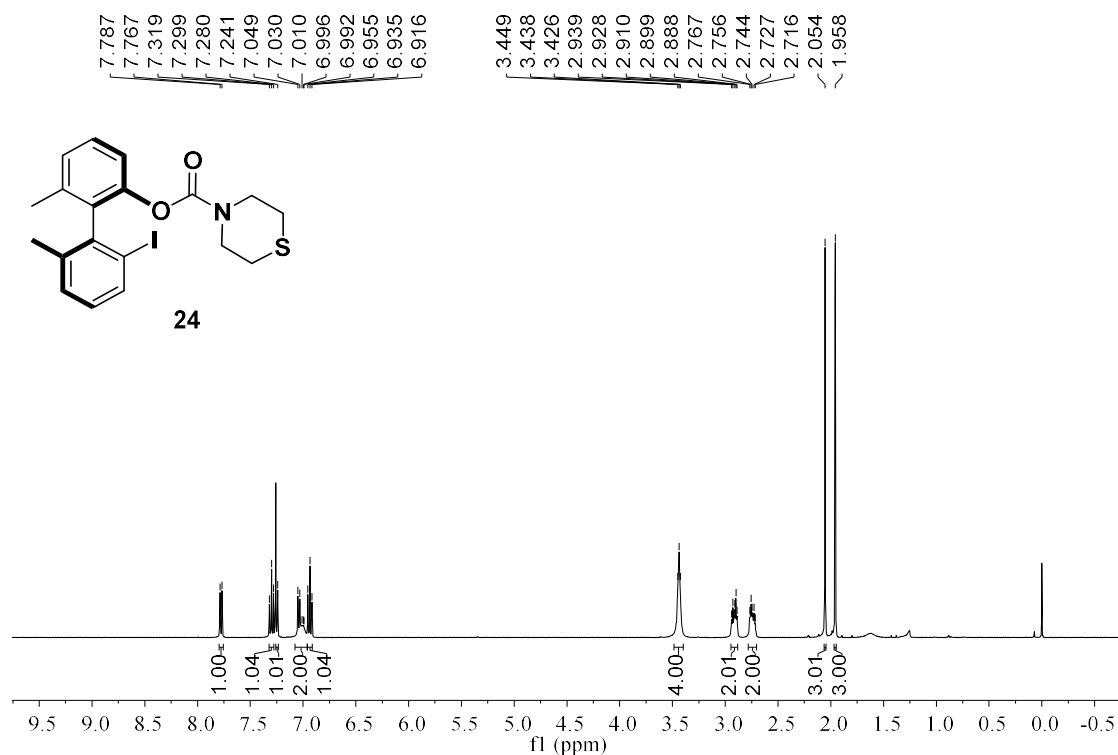

Figure S43. <sup>1</sup>H NMR Spectrum of **24**

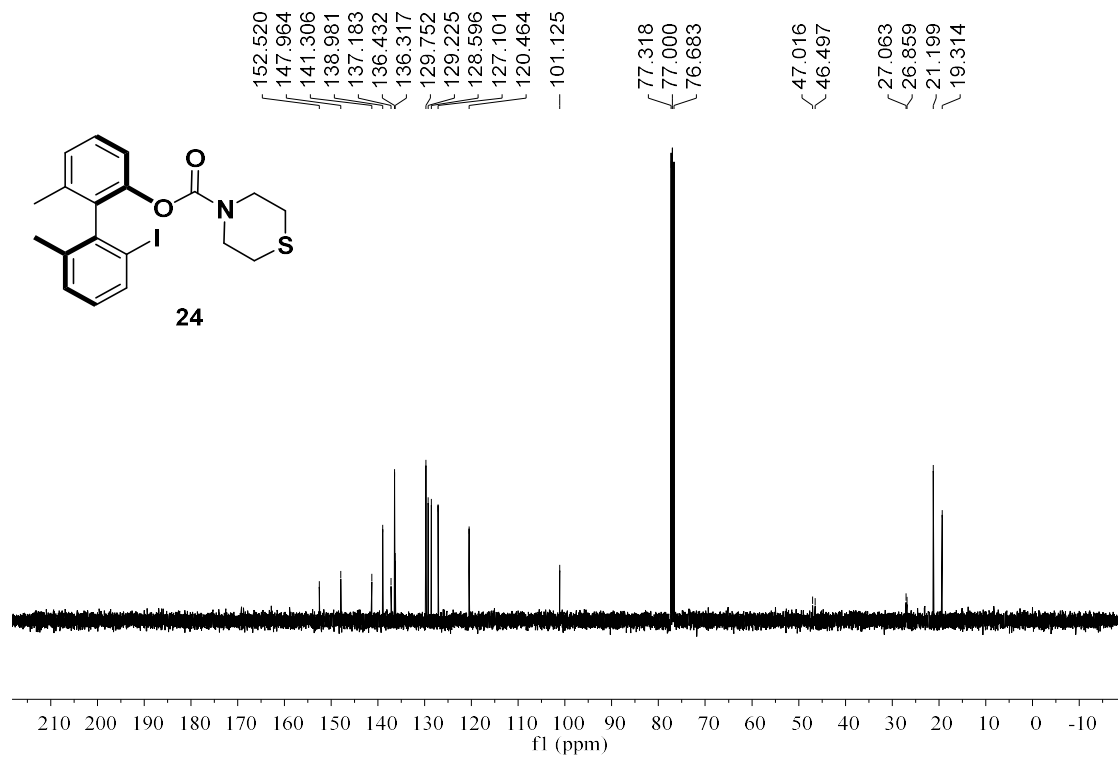

Figure S44. <sup>13</sup>C NMR Spectrum of **24**

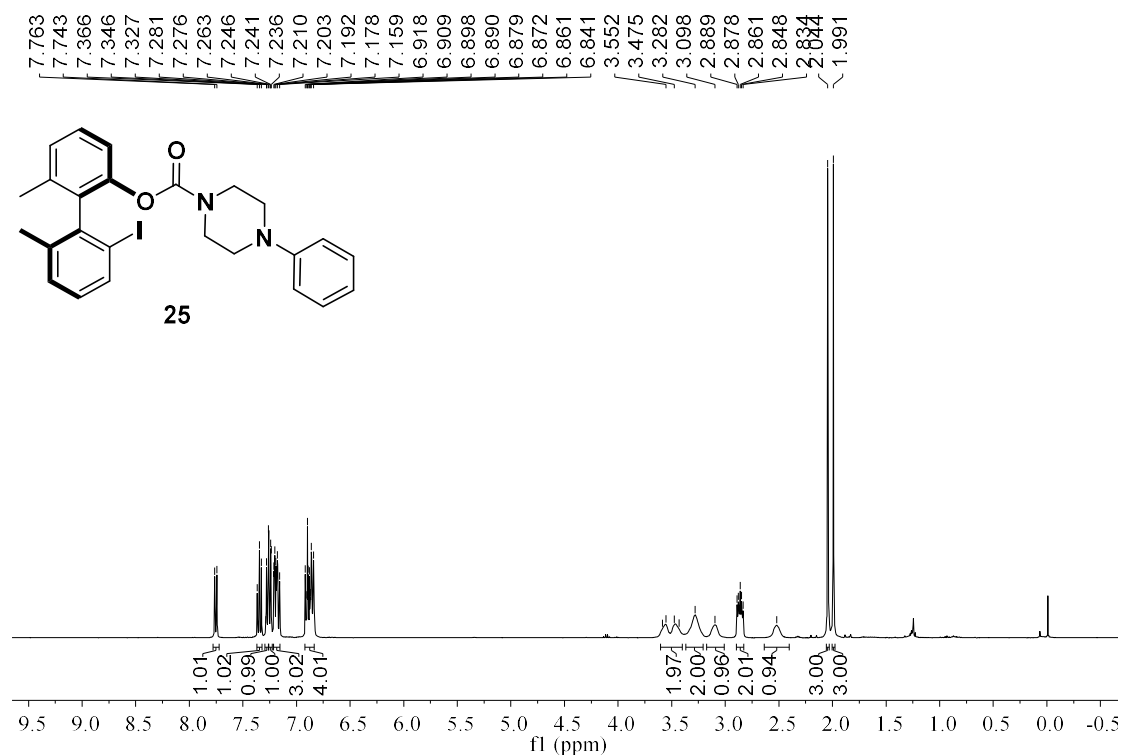

Figure S45. <sup>1</sup>H NMR Spectrum of **25**

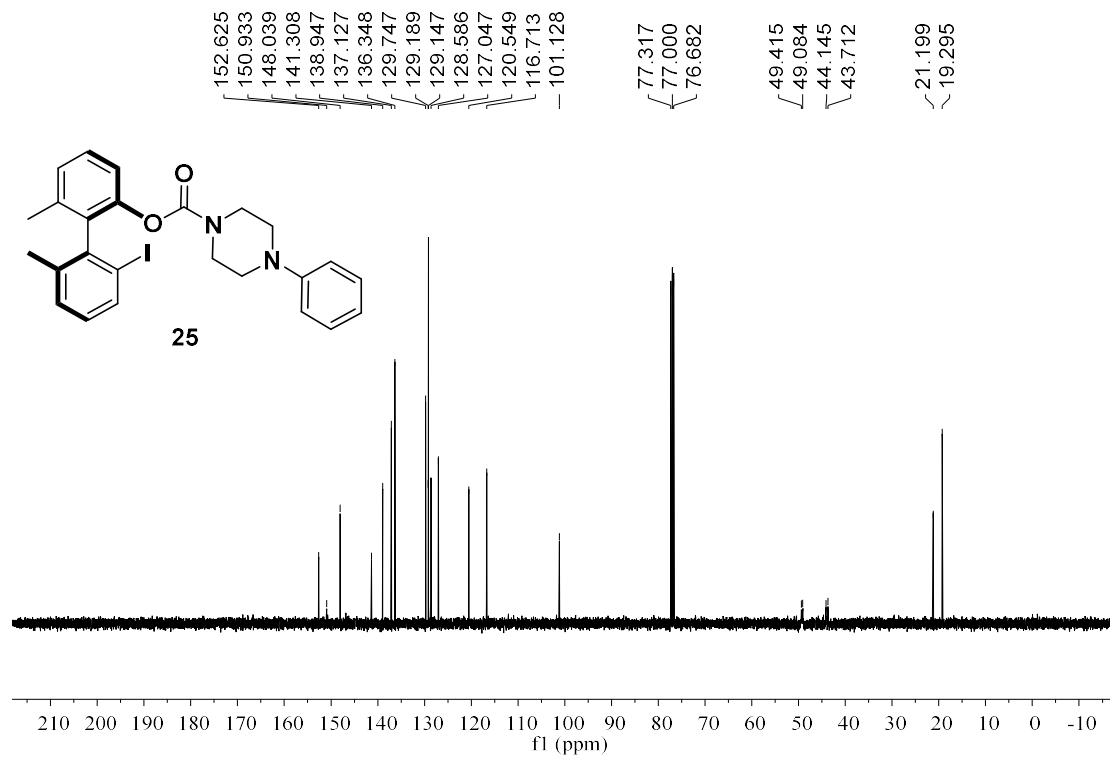

Figure S46. <sup>13</sup>C NMR Spectrum of **25**



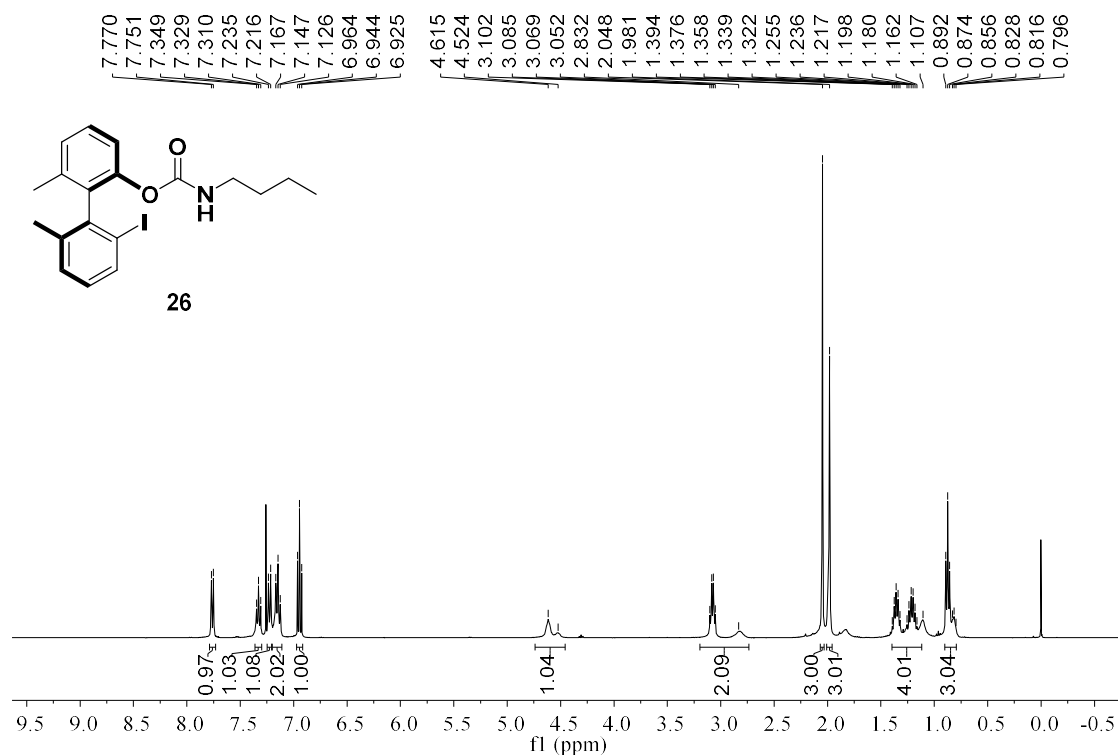

Figure S47. <sup>1</sup>H NMR Spectrum of **26**

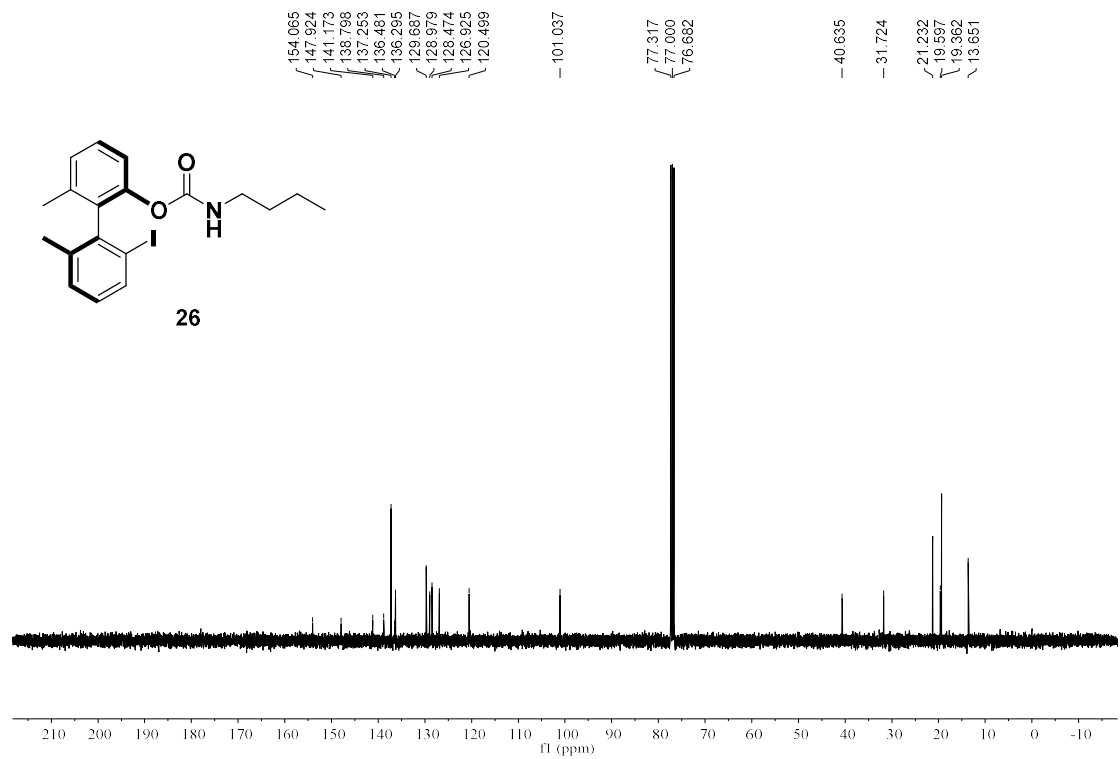

Figure S48. <sup>13</sup>C NMR Spectrum of **26**

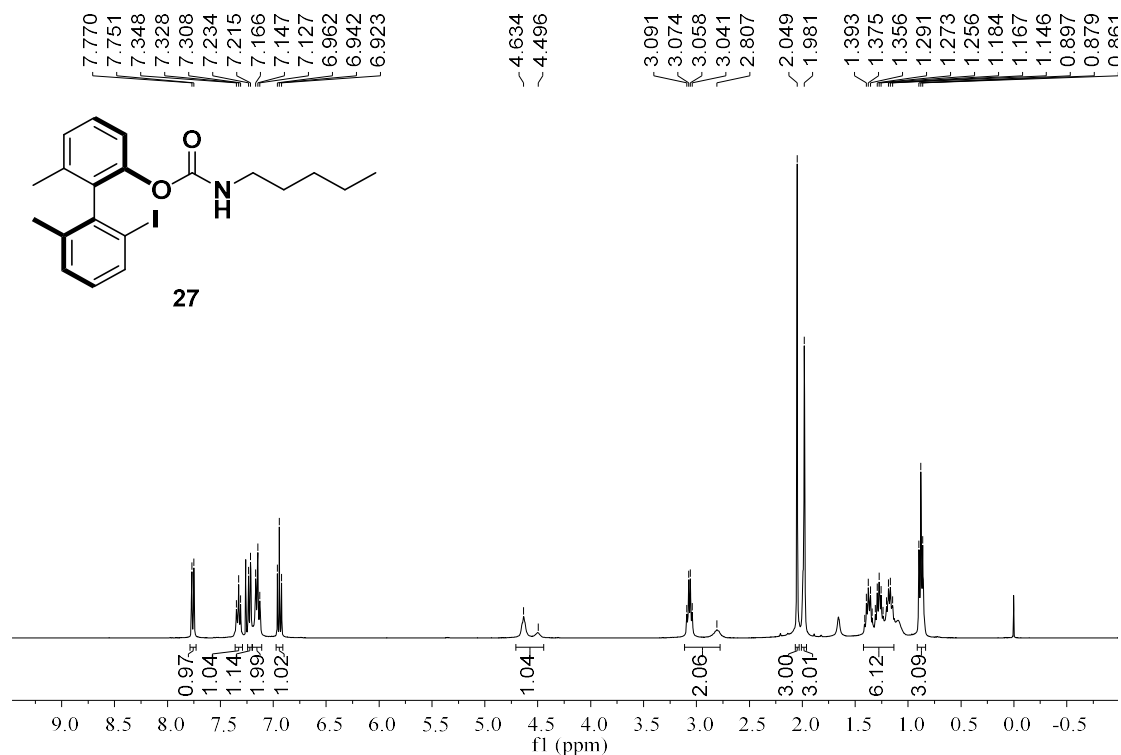

Figure S49. <sup>1</sup>H NMR Spectrum of **27**

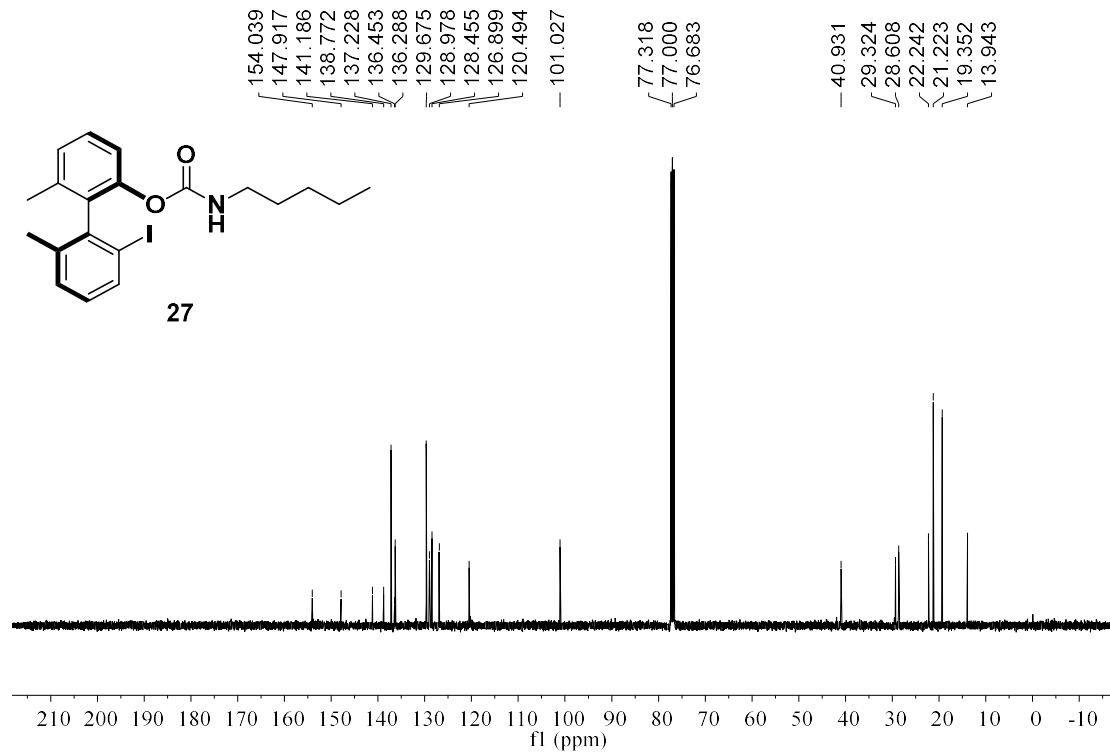

Figure S50. <sup>13</sup>C NMR Spectrum of **27**

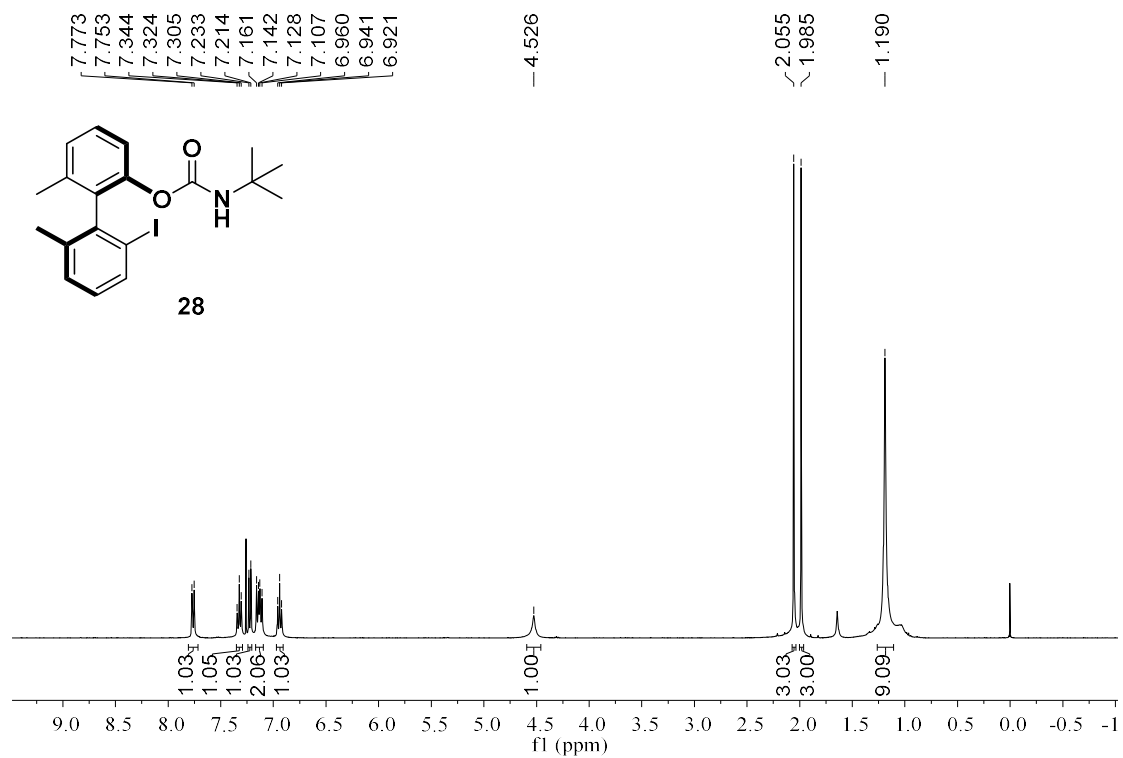

Figure S51. <sup>1</sup>H NMR Spectrum of **28**

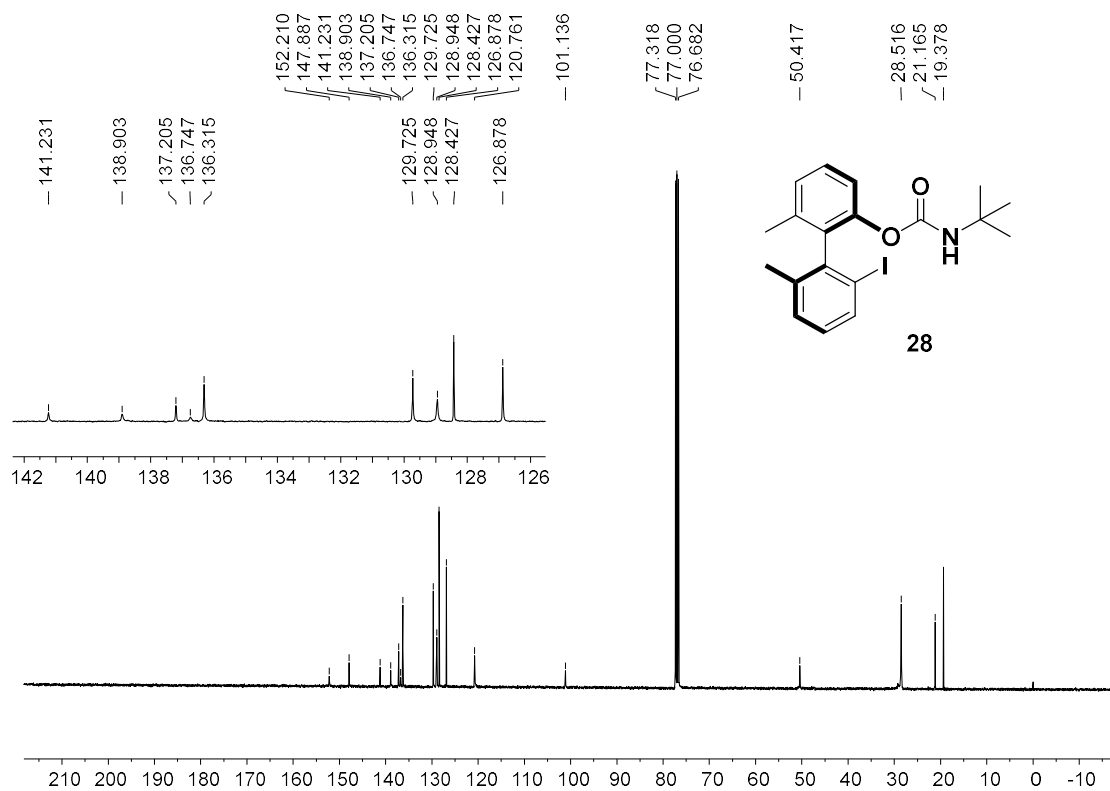

Figure S52. <sup>13</sup>C NMR Spectrum of **28**

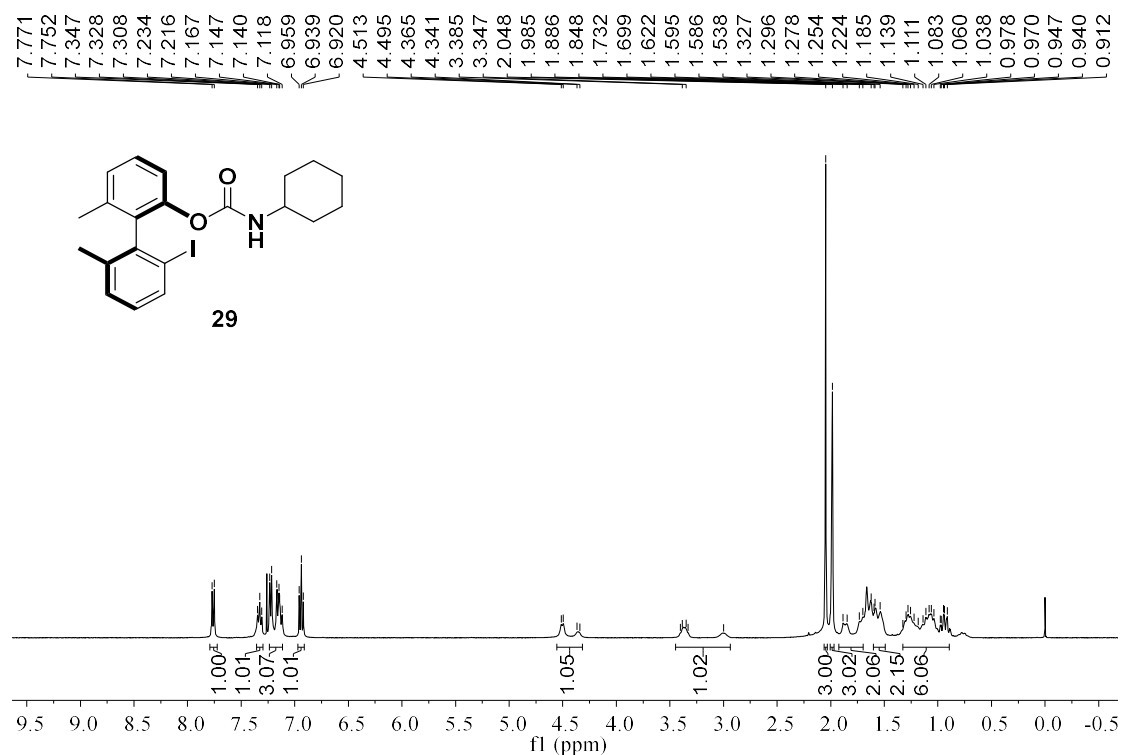

**Figure S53. <sup>1</sup>H NMR Spectrum of 29**

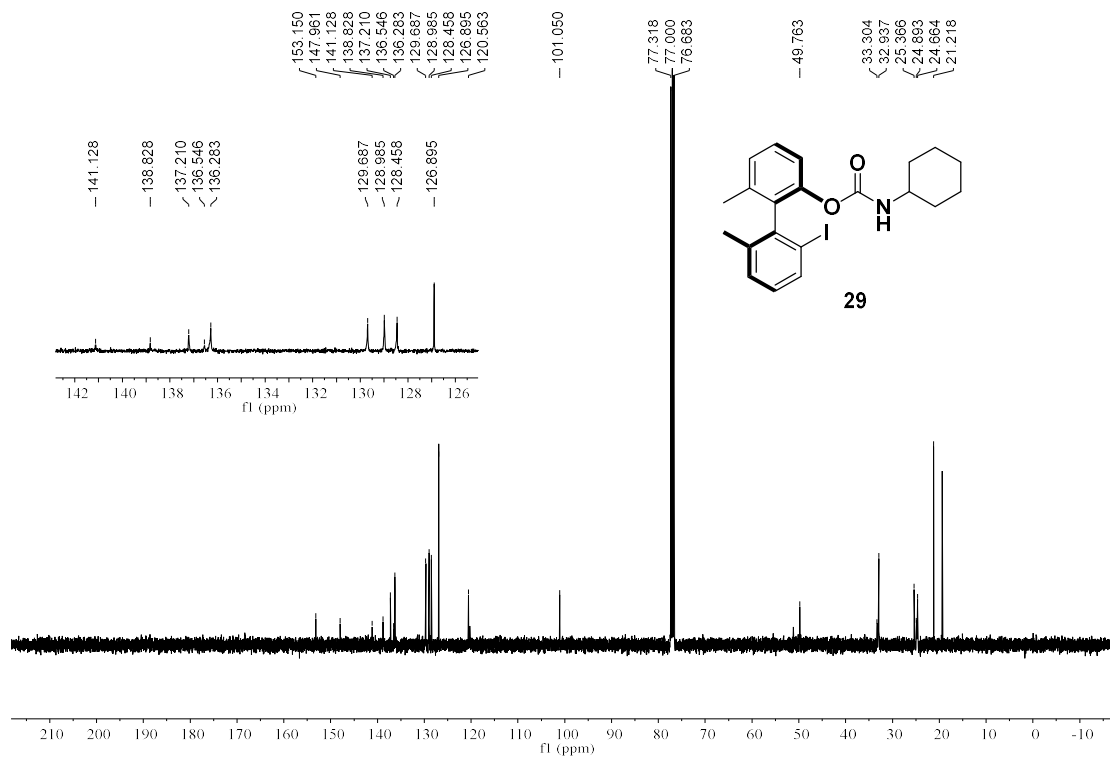

**Figure S54. <sup>13</sup>C NMR Spectrum of 29**

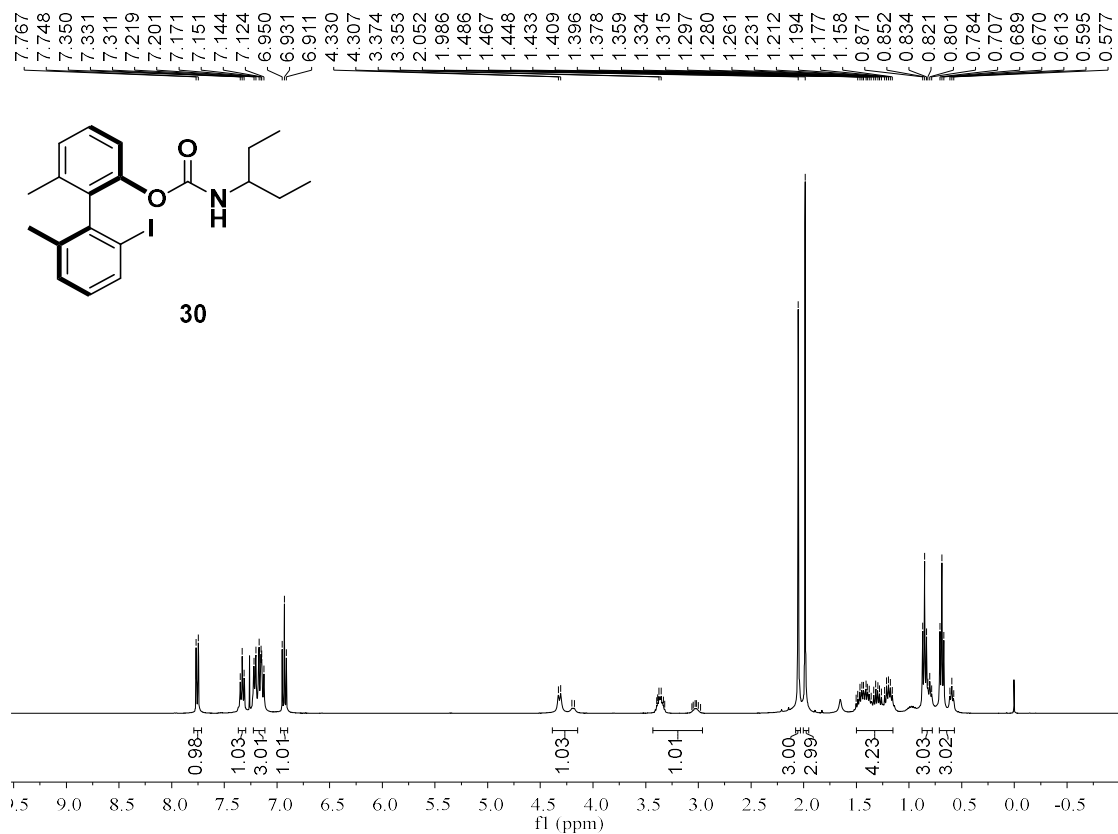

Figure S55. <sup>1</sup>H NMR Spectrum of **30**

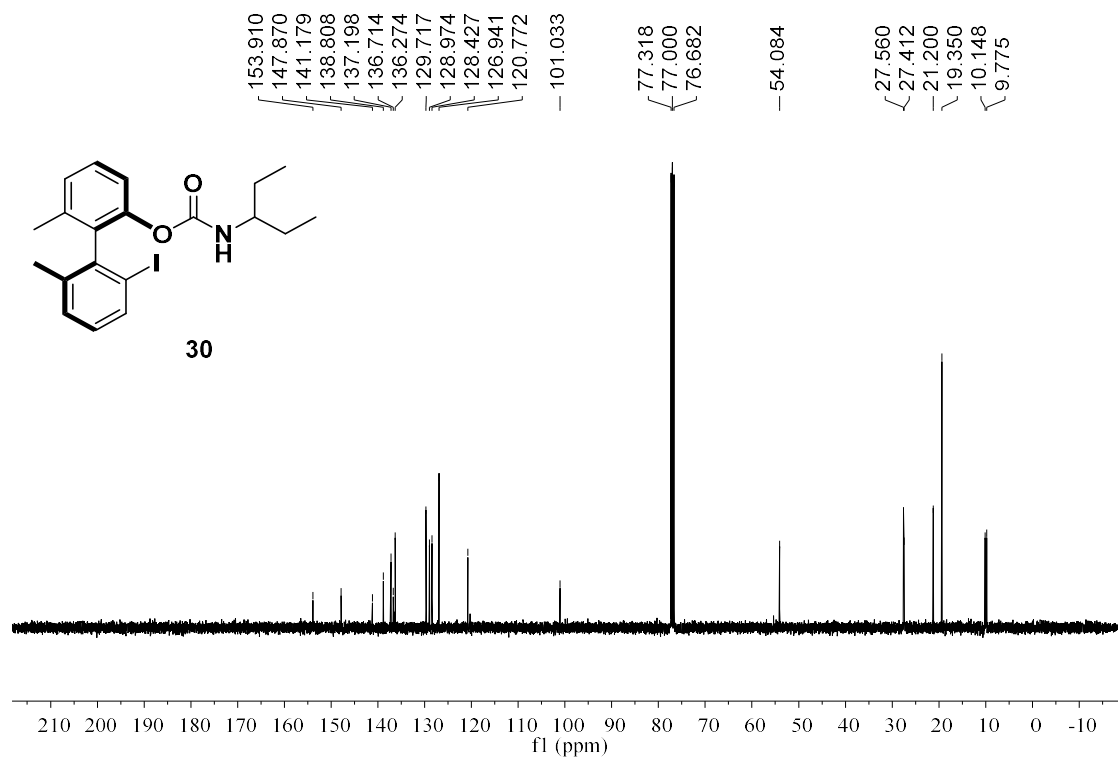

Figure S56. <sup>13</sup>C NMR Spectrum of **30**

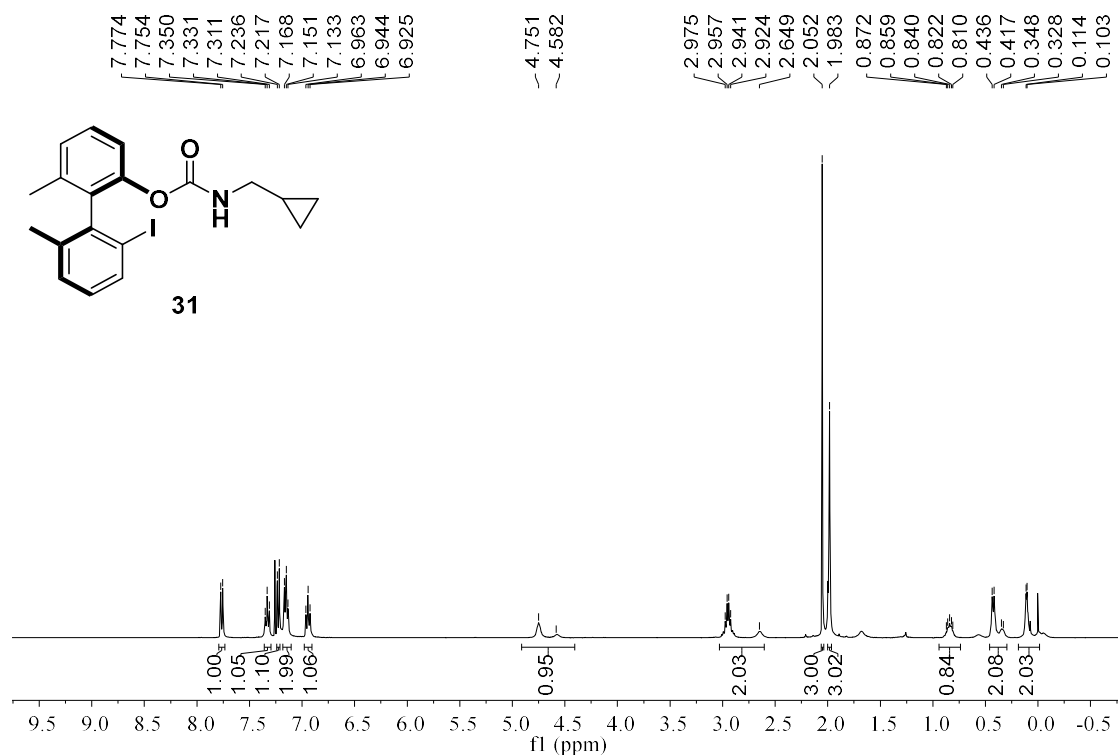

Figure S57. <sup>1</sup>H NMR Spectrum of **31**

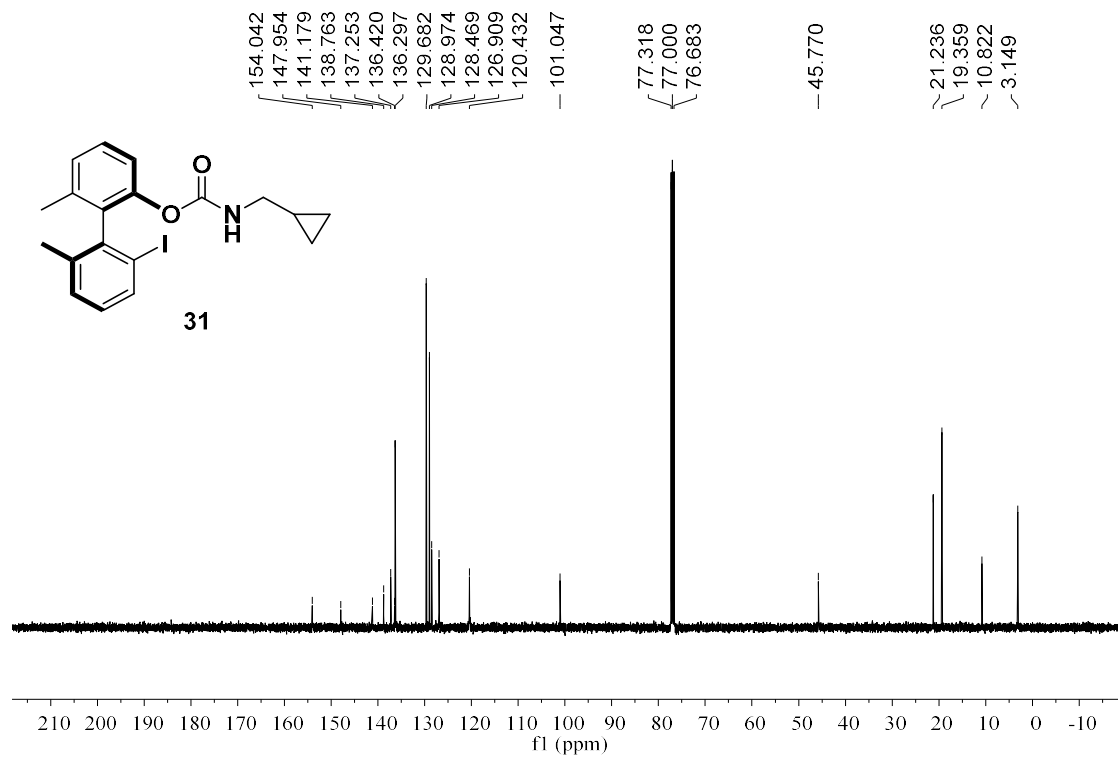

Figure S58. <sup>13</sup>C NMR Spectrum of **31**

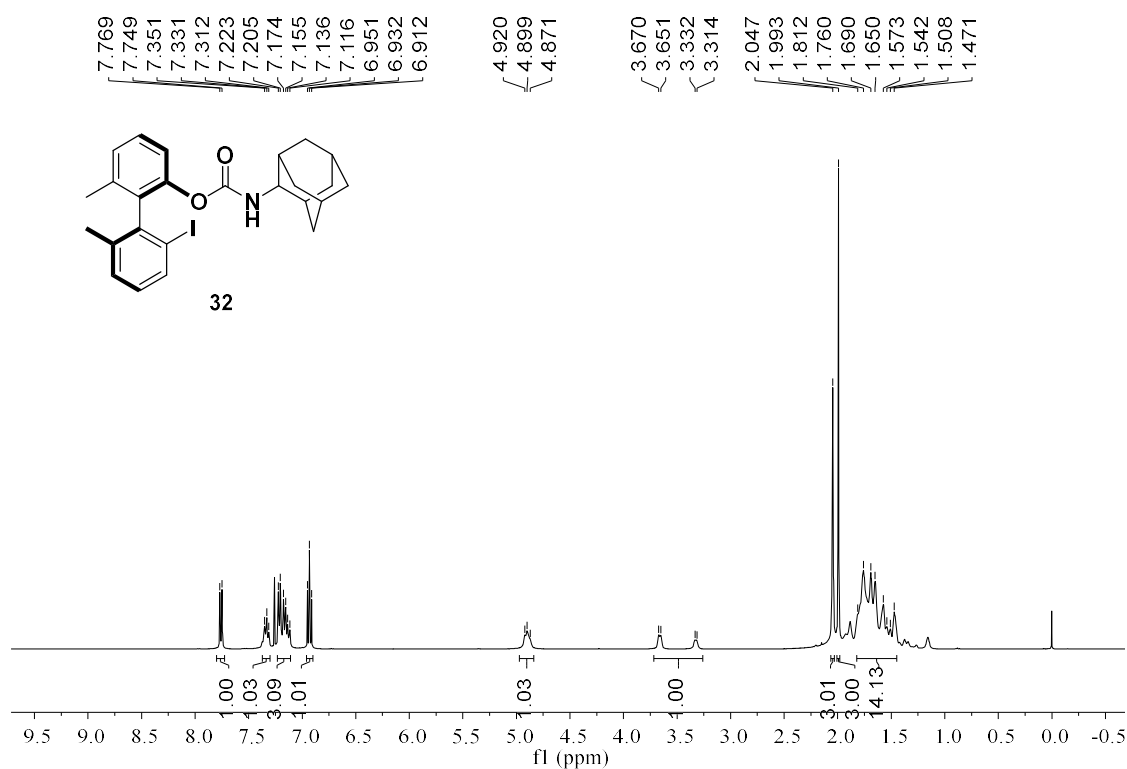

**Figure S59.** <sup>1</sup>H NMR Spectrum of **32**

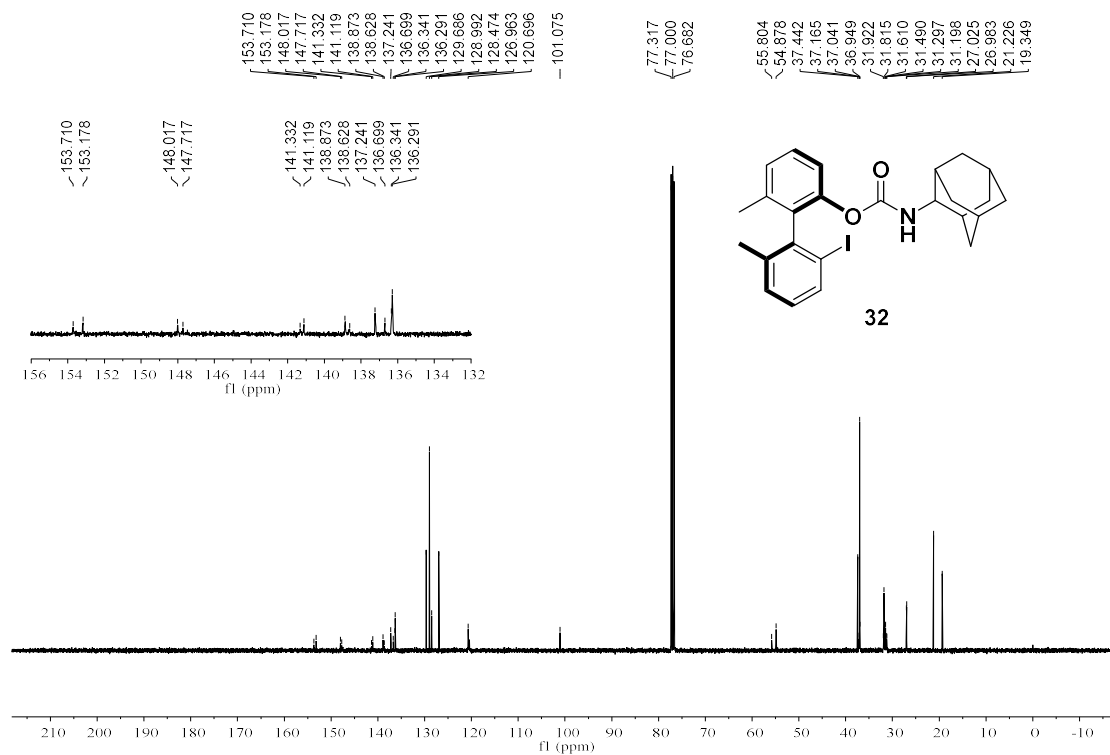

**Figure S60.** <sup>13</sup>C NMR Spectrum of **32**

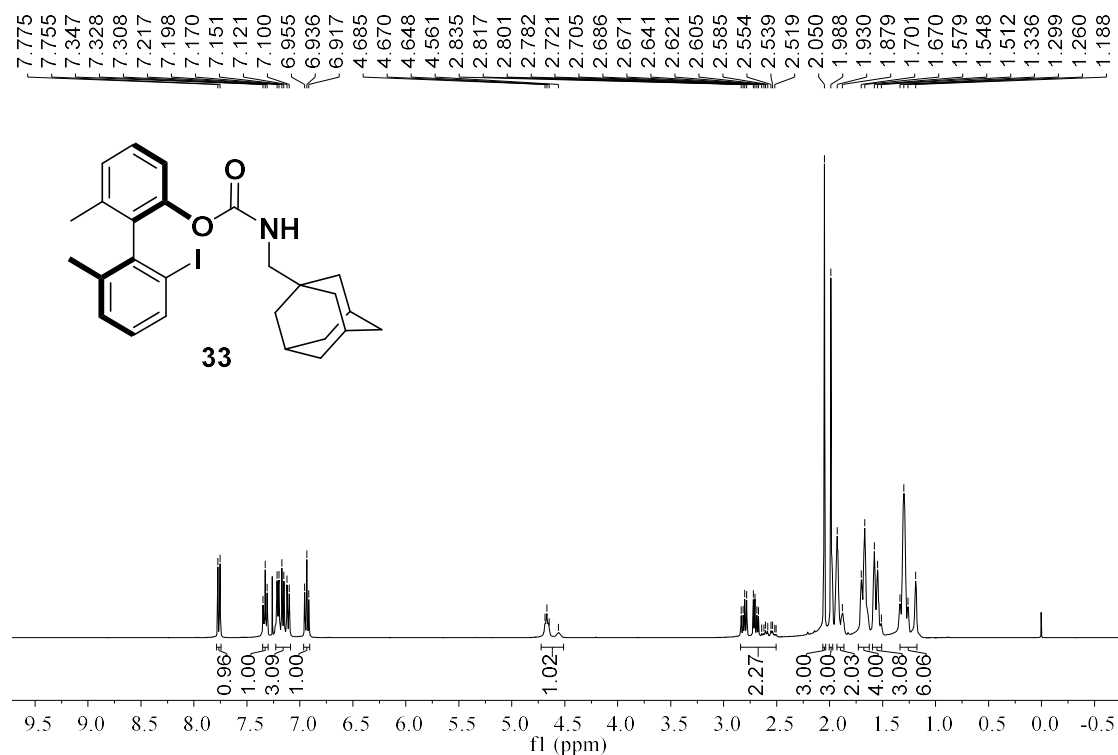

**Figure S61. <sup>1</sup>H NMR Spectrum of 33**

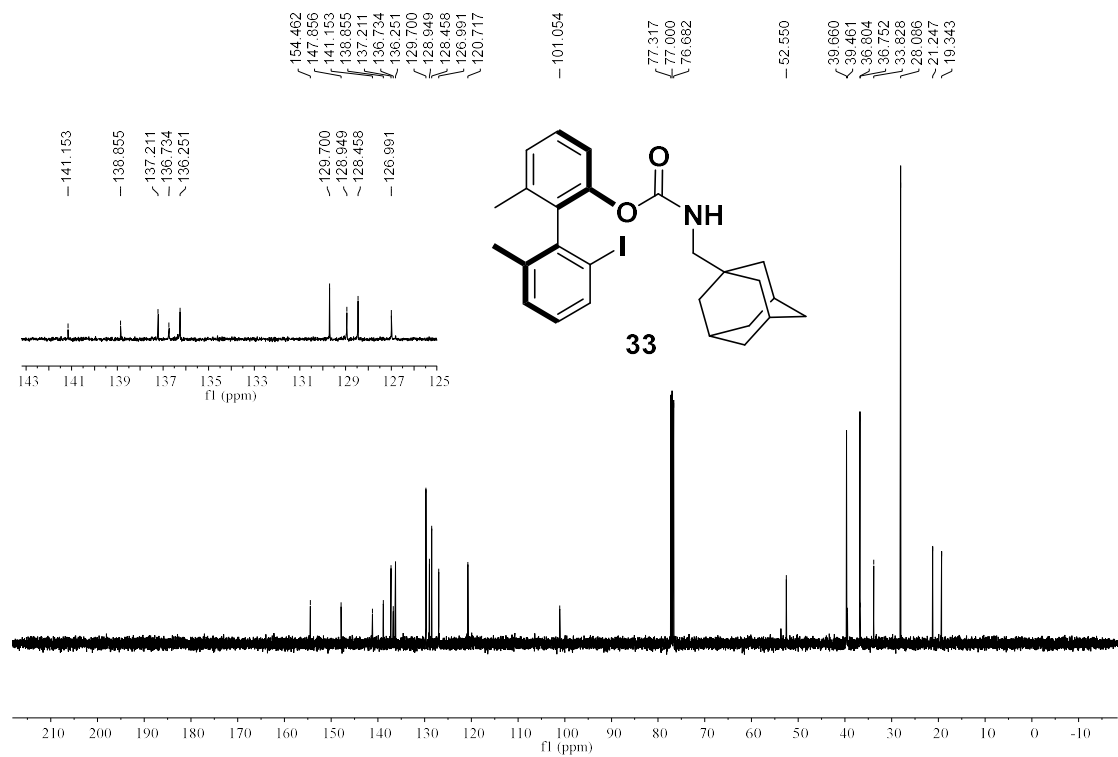

**Figure S62. <sup>13</sup>C NMR Spectrum of 33**



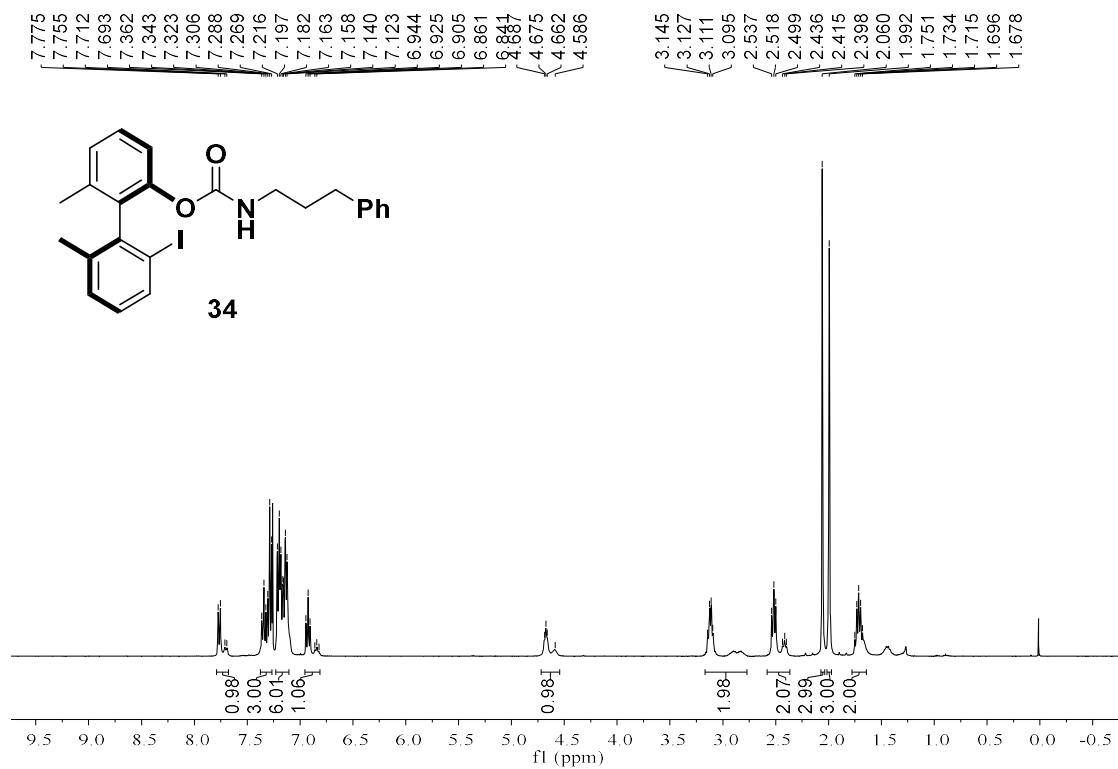

Figure S63. <sup>1</sup>H NMR Spectrum of 34

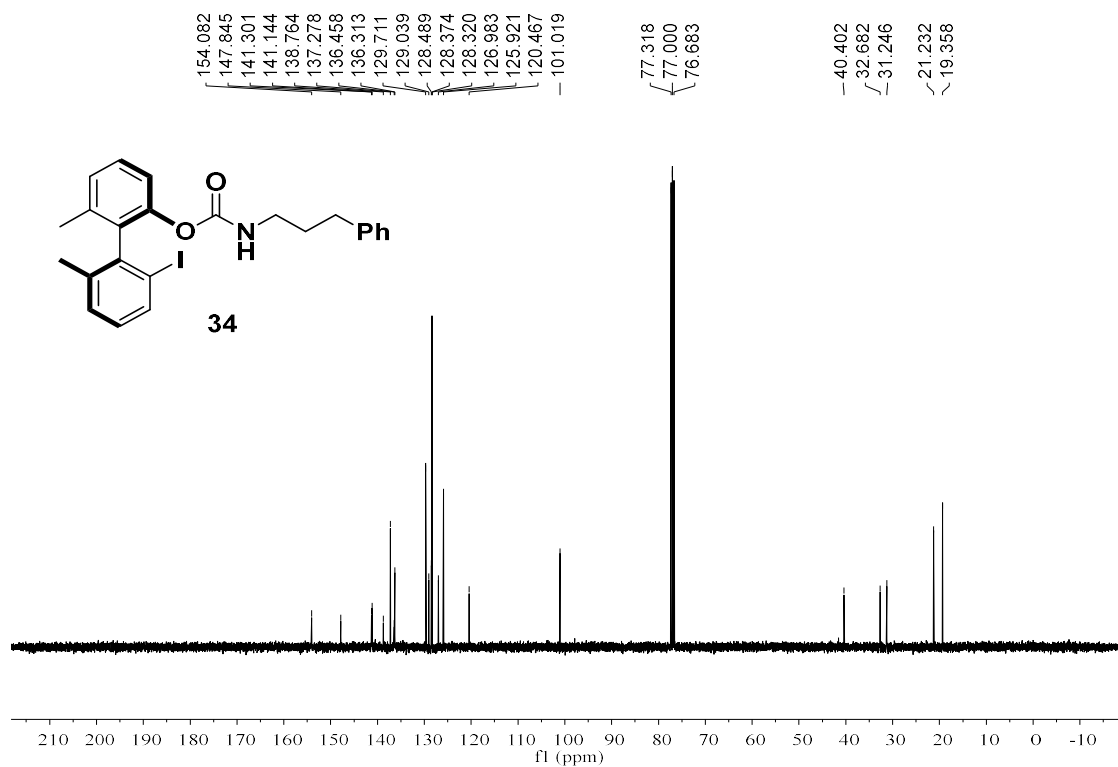

Figure S64. <sup>13</sup>C NMR Spectrum of 34

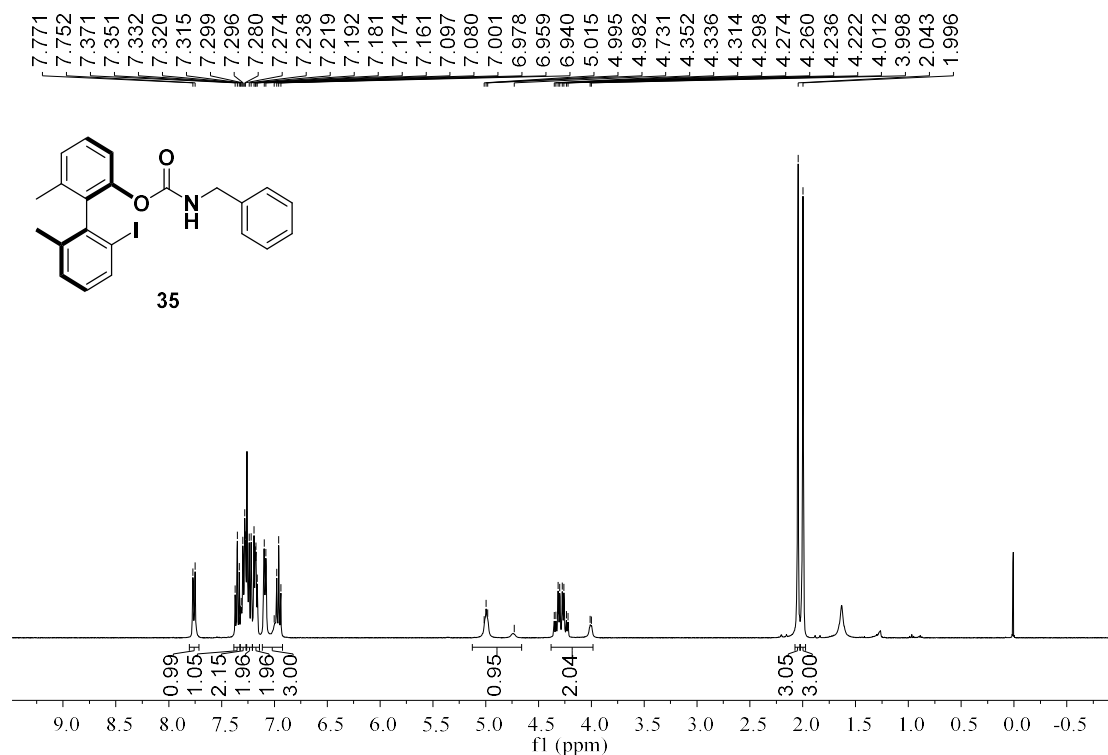

Figure S65. <sup>1</sup>H NMR Spectrum of 35

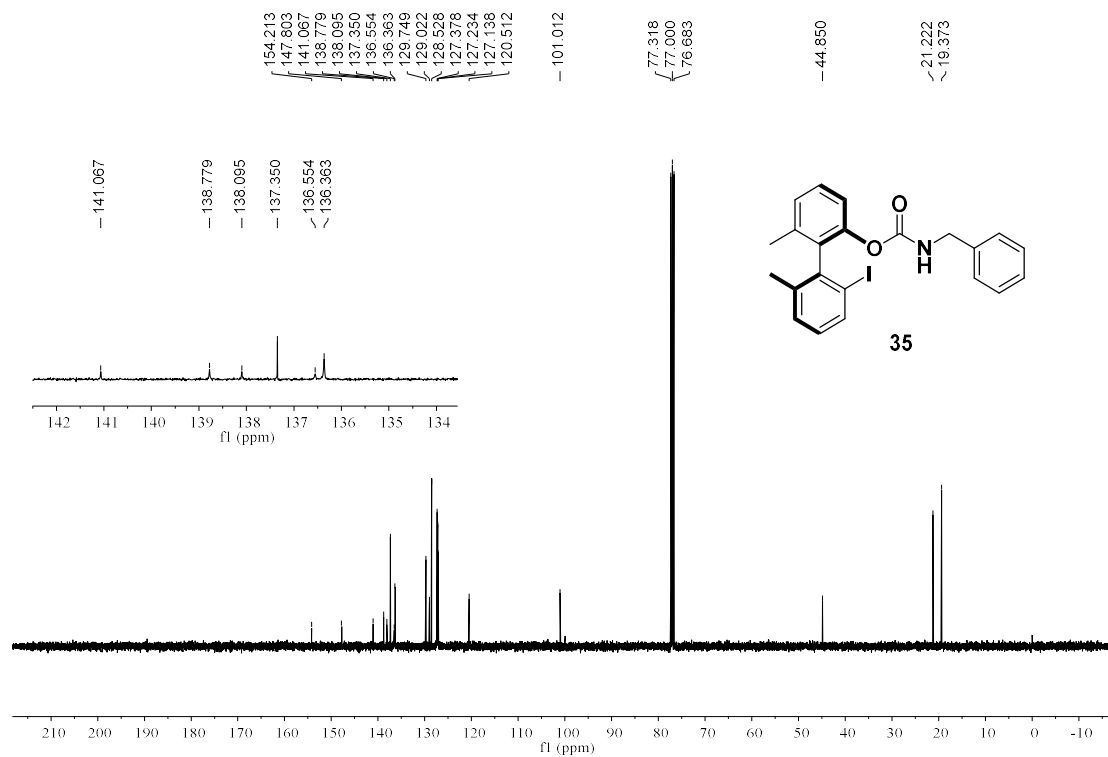

Figure S66. <sup>13</sup>C NMR Spectrum of 35

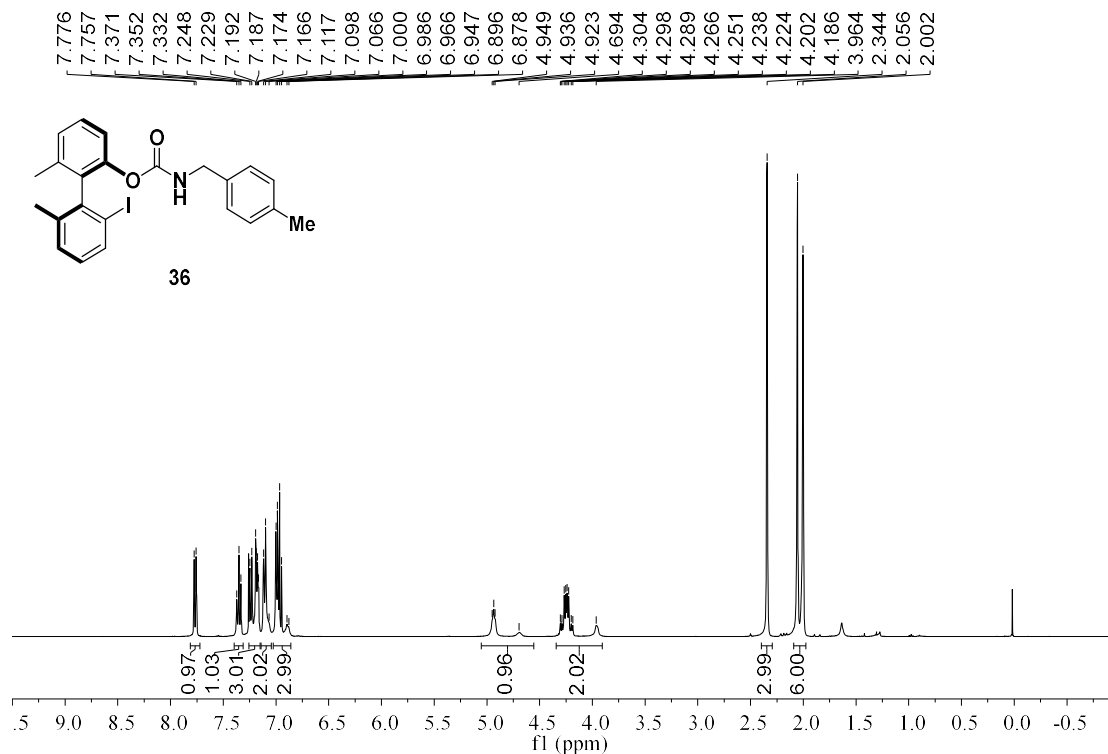

Figure S67. <sup>1</sup>H NMR Spectrum of 36

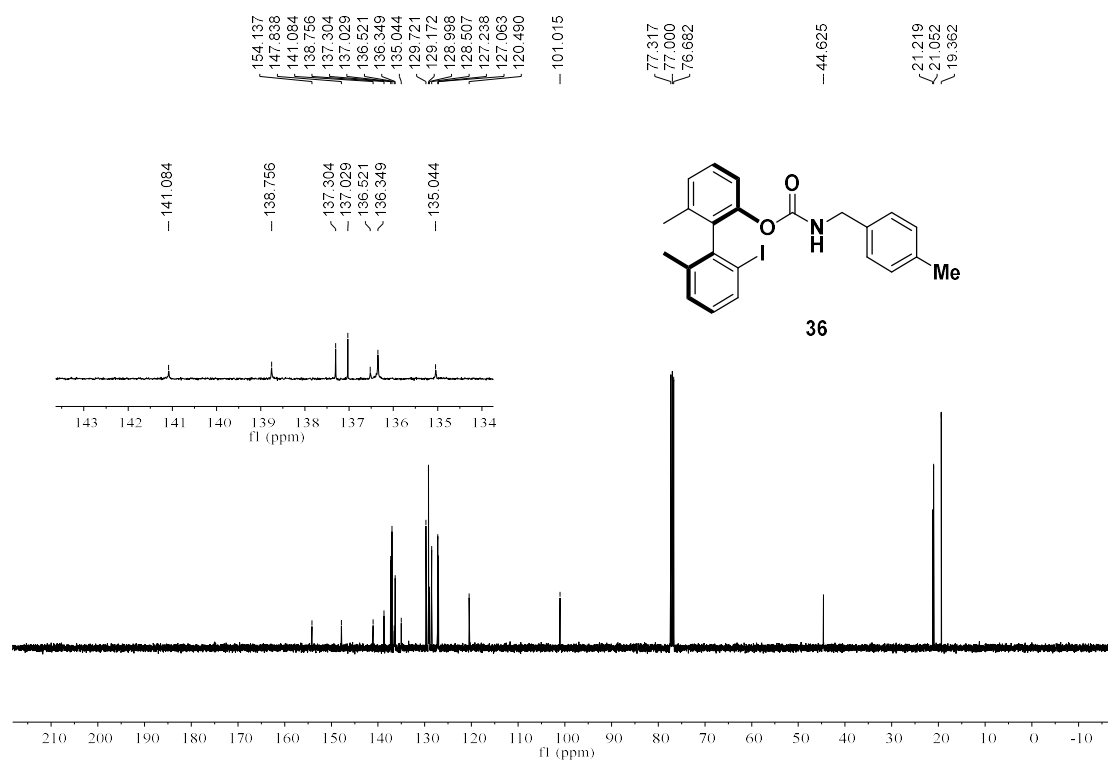

Figure S68. <sup>13</sup>C NMR Spectrum of 36

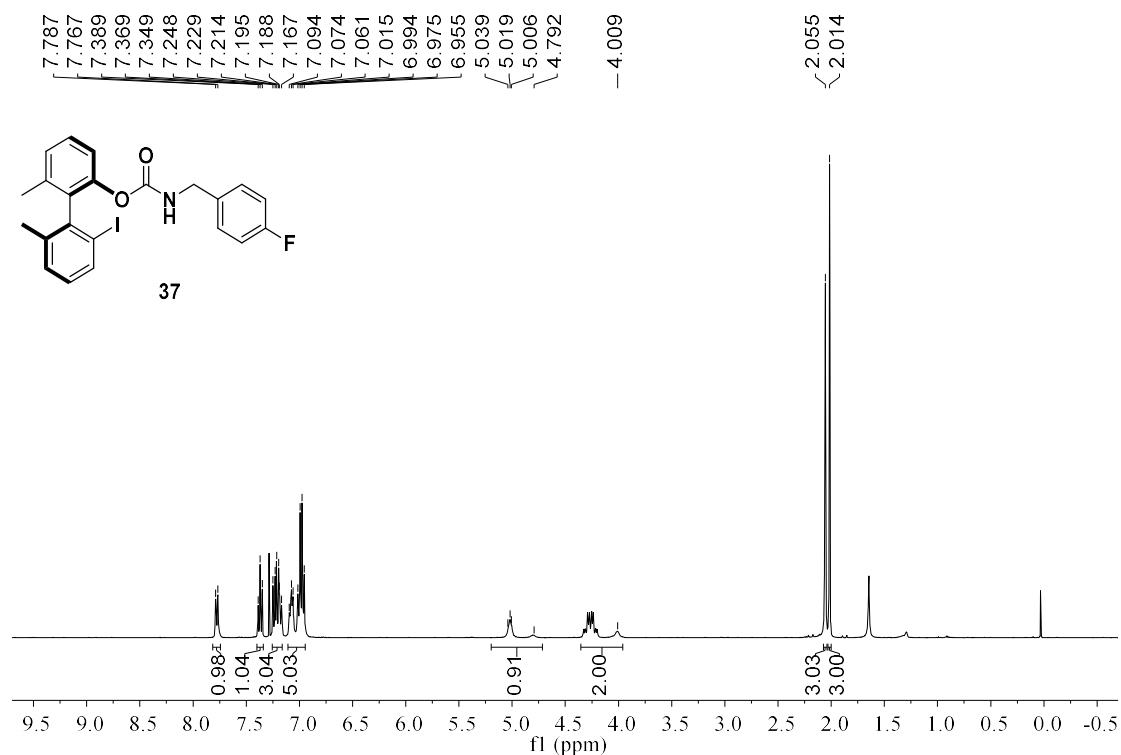

Figure S69. <sup>1</sup>H NMR Spectrum of **37**

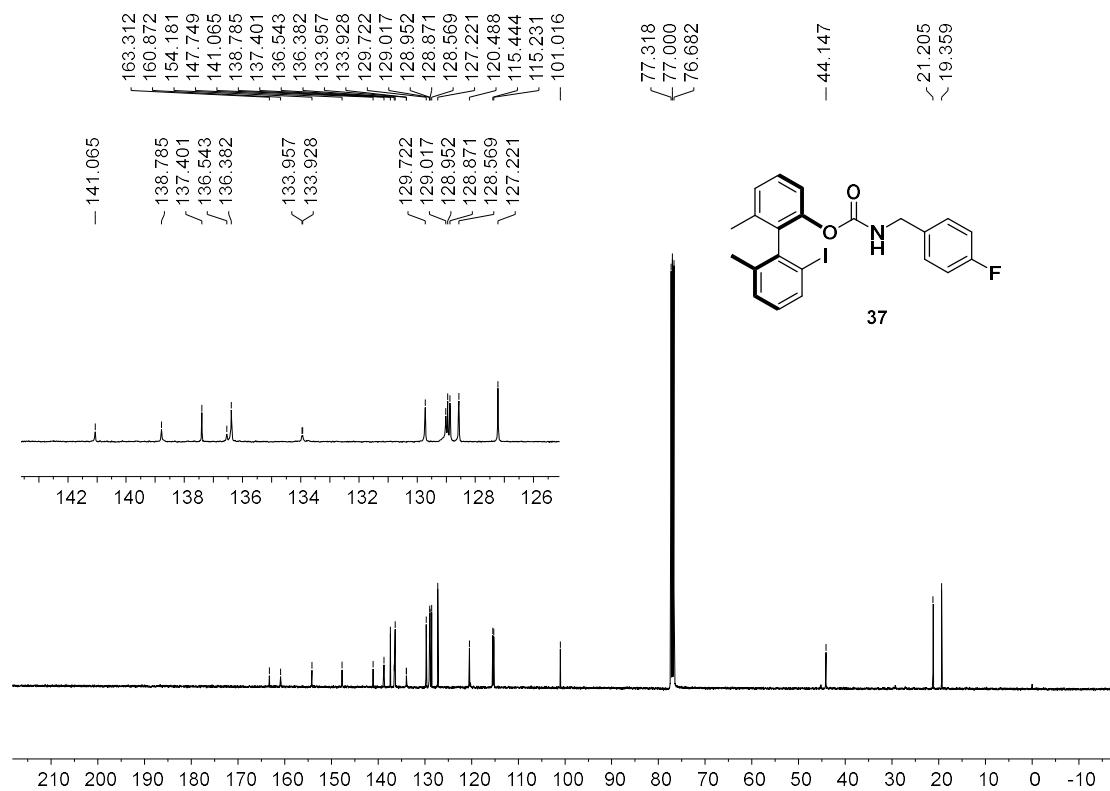

Figure S70. <sup>13</sup>C NMR Spectrum of **37**

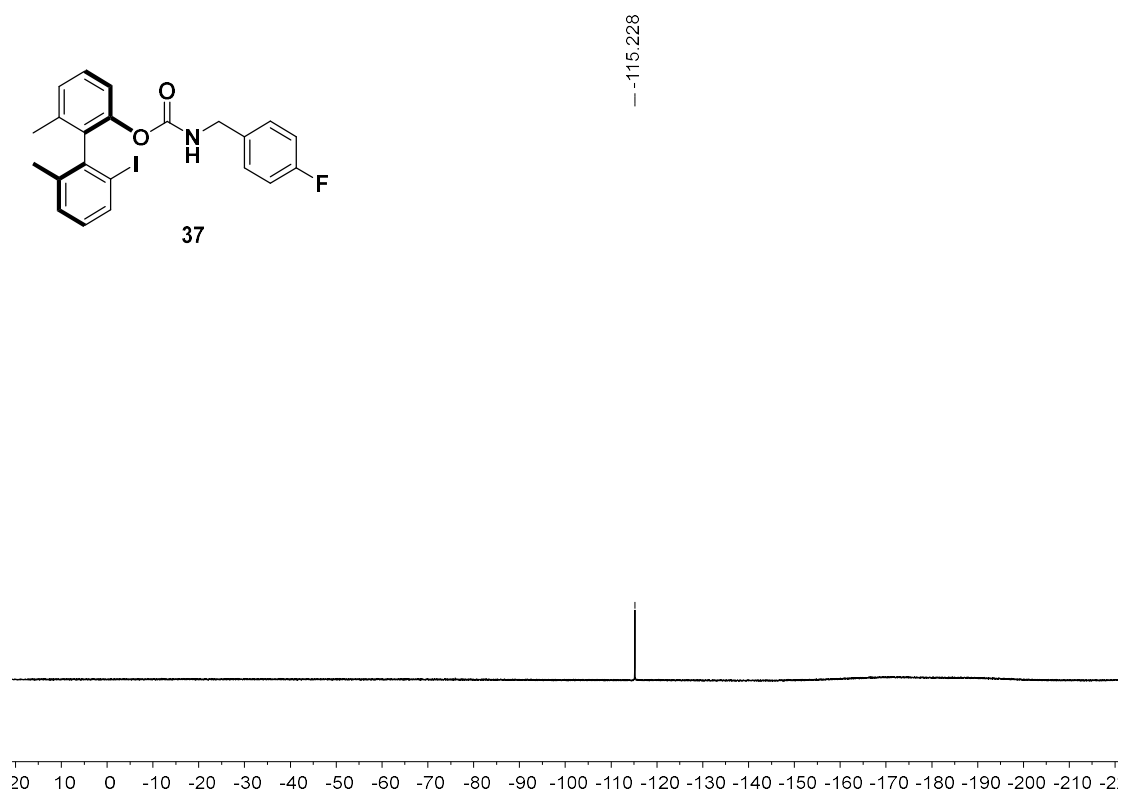

**Figure S71.**  $^{19}\text{F}$  NMR Spectrum of **37**

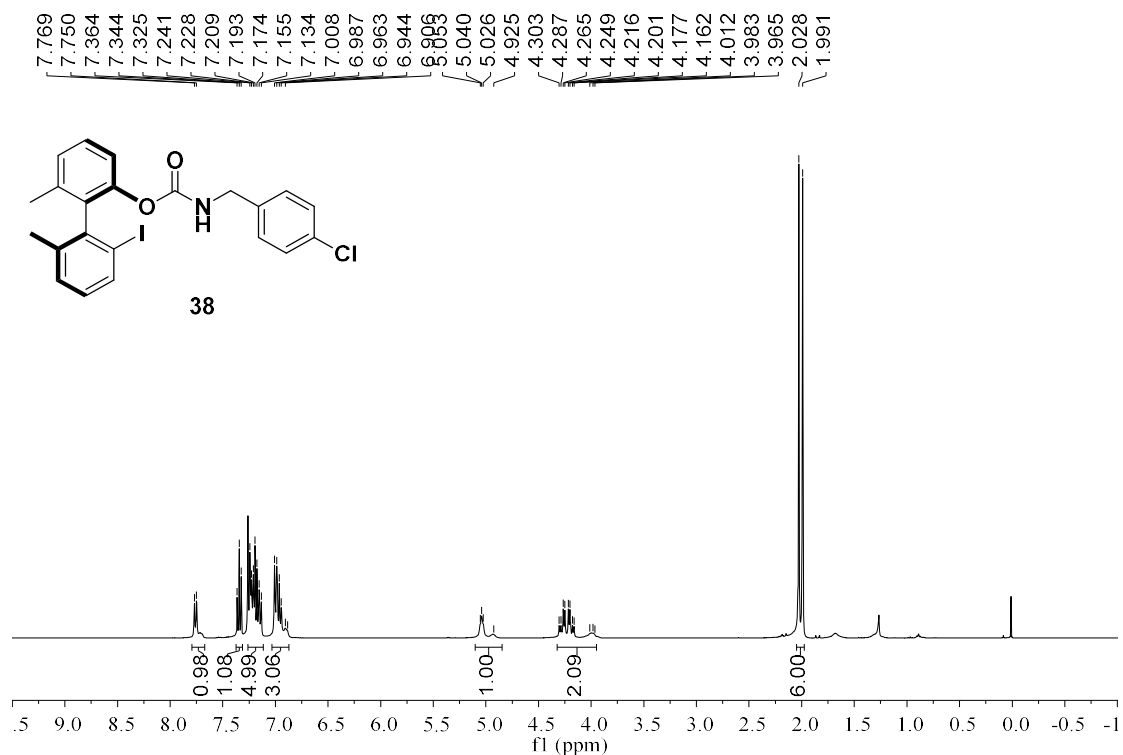

Figure S72. <sup>1</sup>H NMR Spectrum of **38**

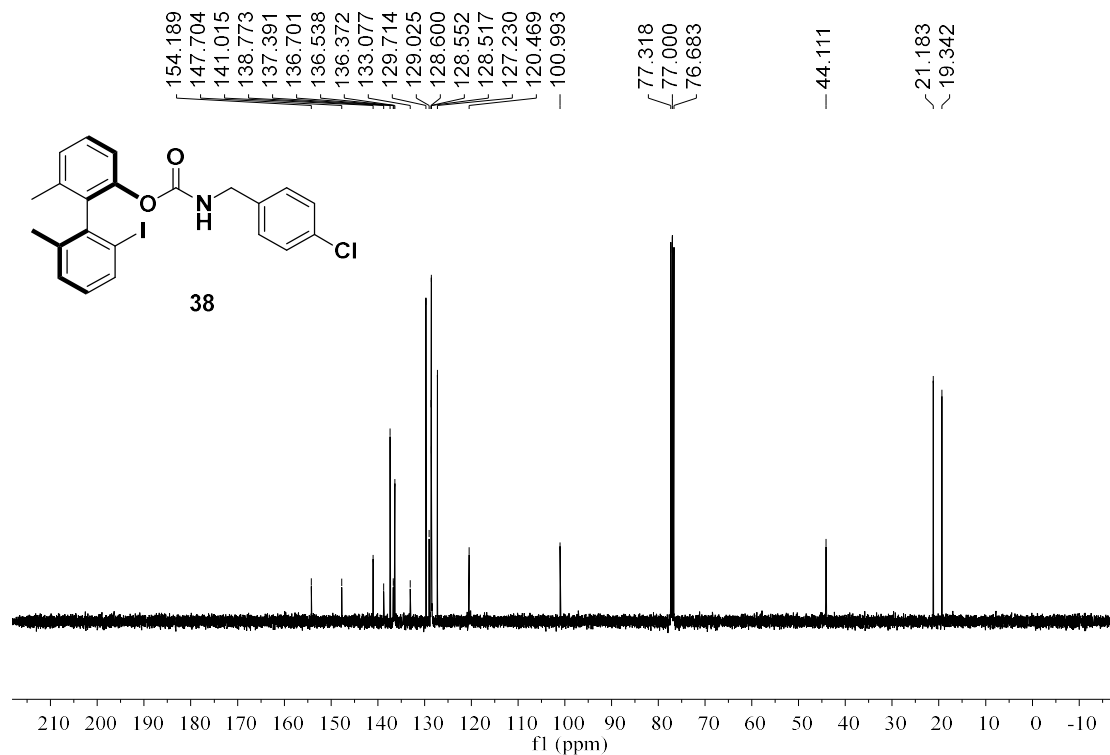

Figure S73. <sup>13</sup>C NMR Spectrum of **38**

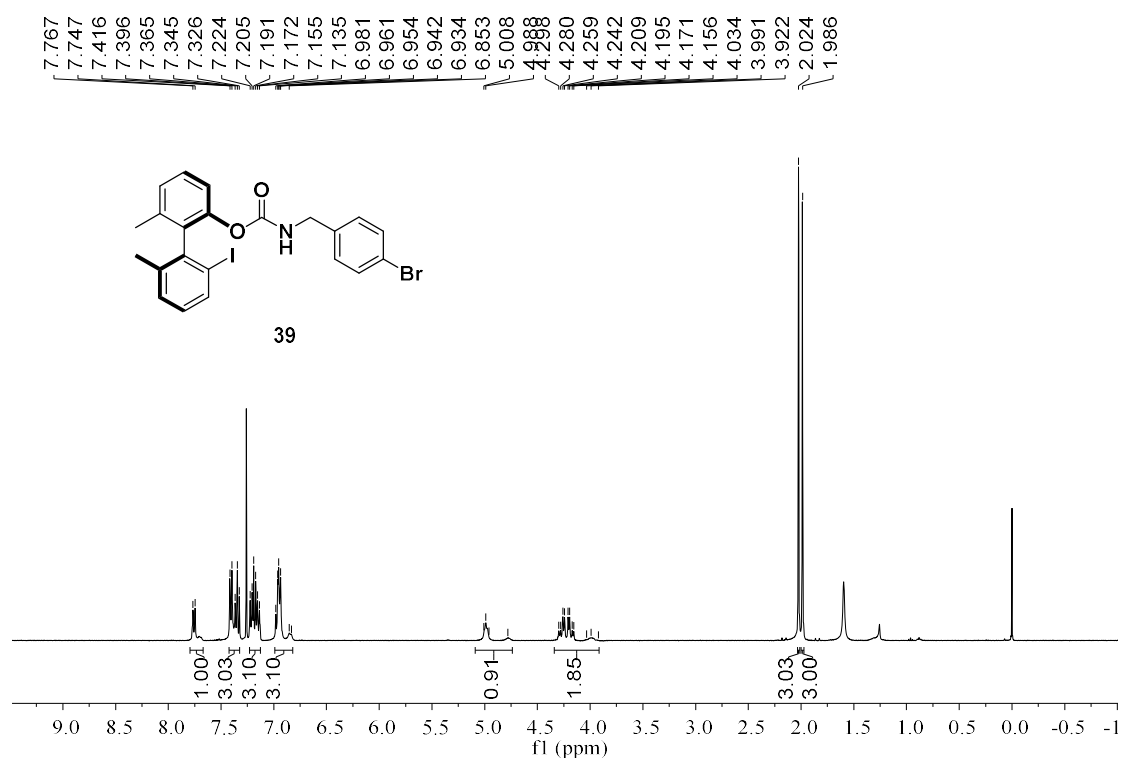

Figure S74. <sup>1</sup>H NMR Spectrum of **39**

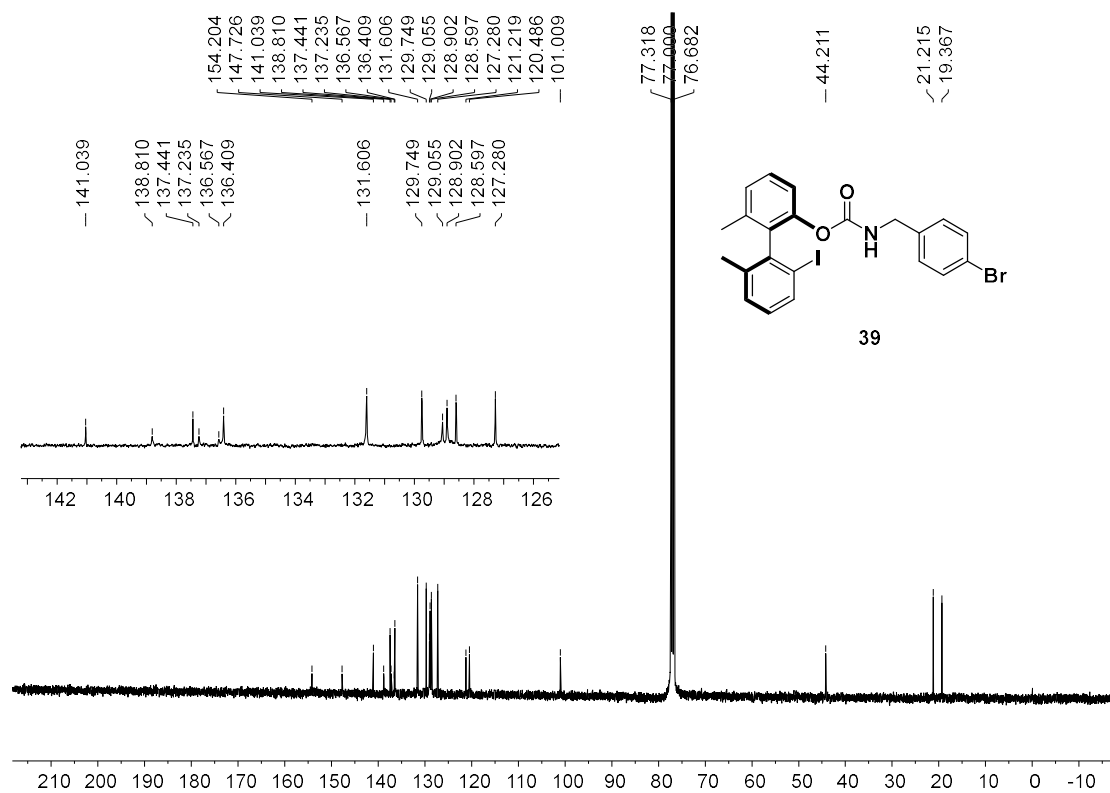

Figure S75. <sup>13</sup>C NMR Spectrum of **39**

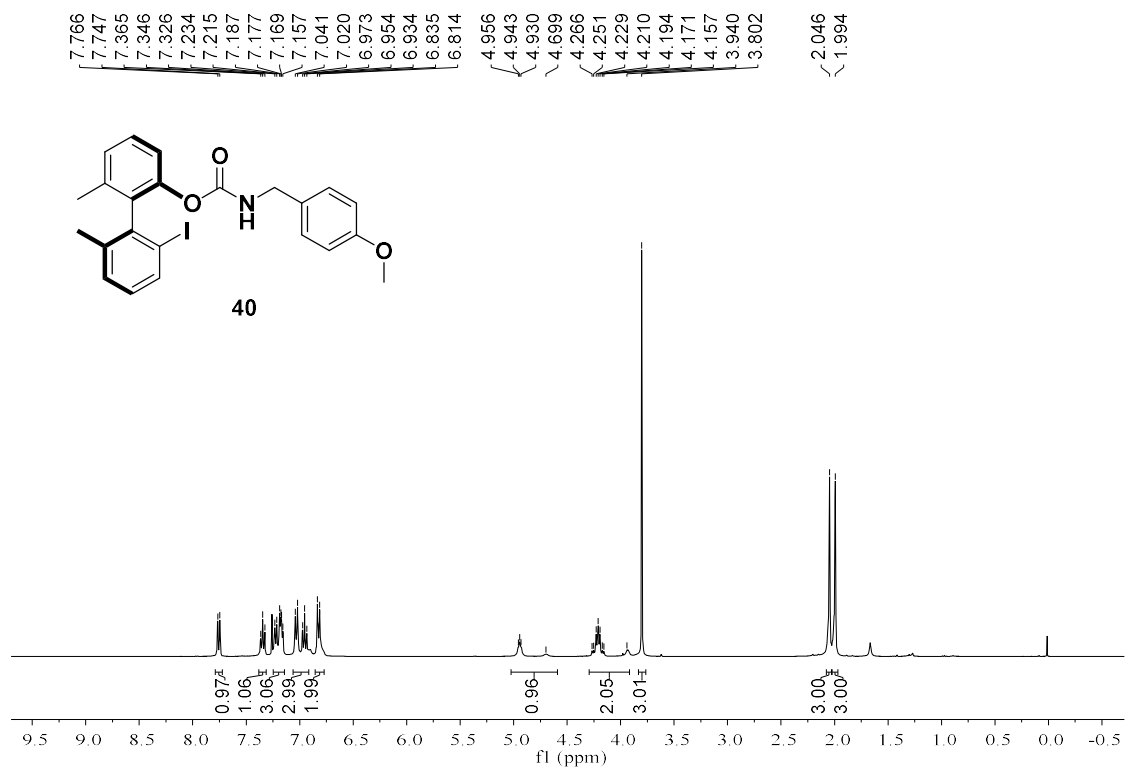

Figure S76. <sup>1</sup>H NMR Spectrum of 40

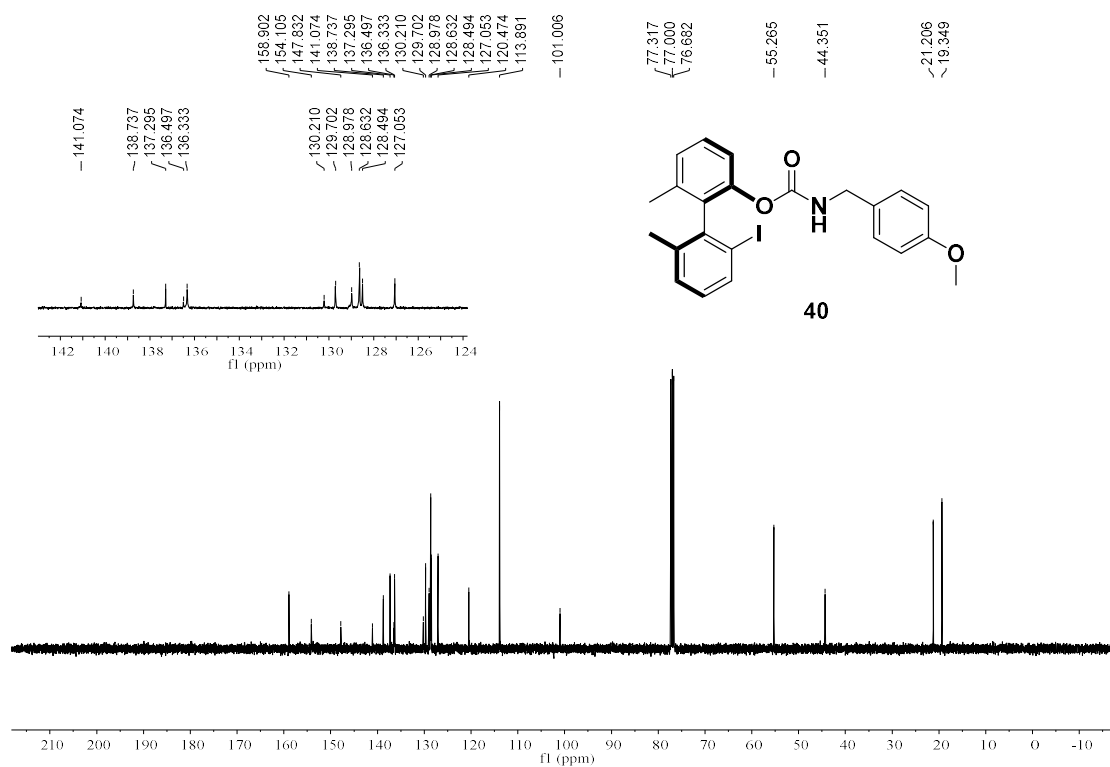

Figure S77. <sup>13</sup>C NMR Spectrum of 40



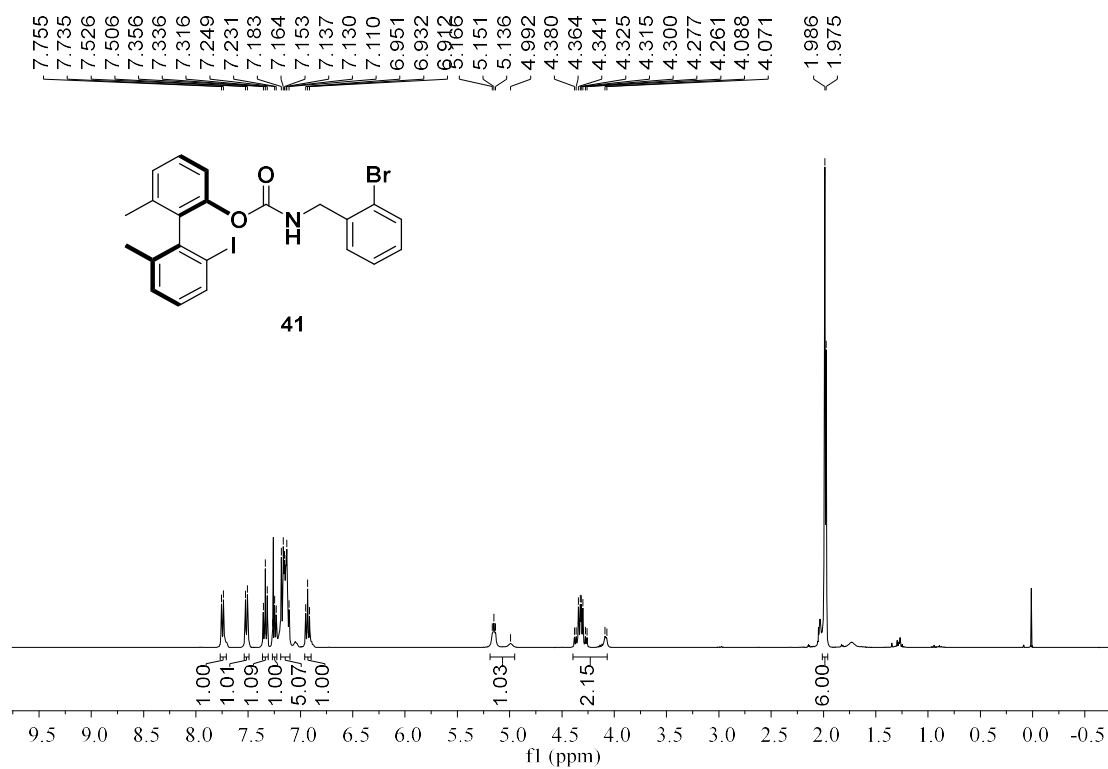

Figure S78. <sup>1</sup>H NMR Spectrum of 41

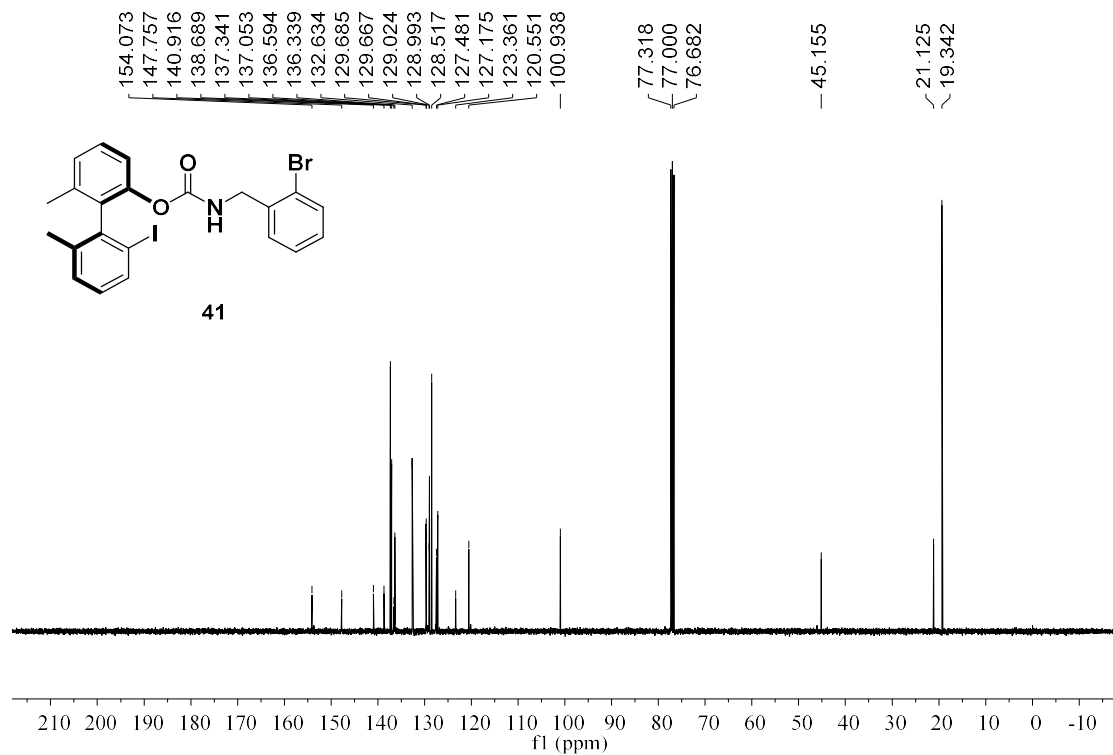

Figure S79. <sup>13</sup>C NMR Spectrum of 41

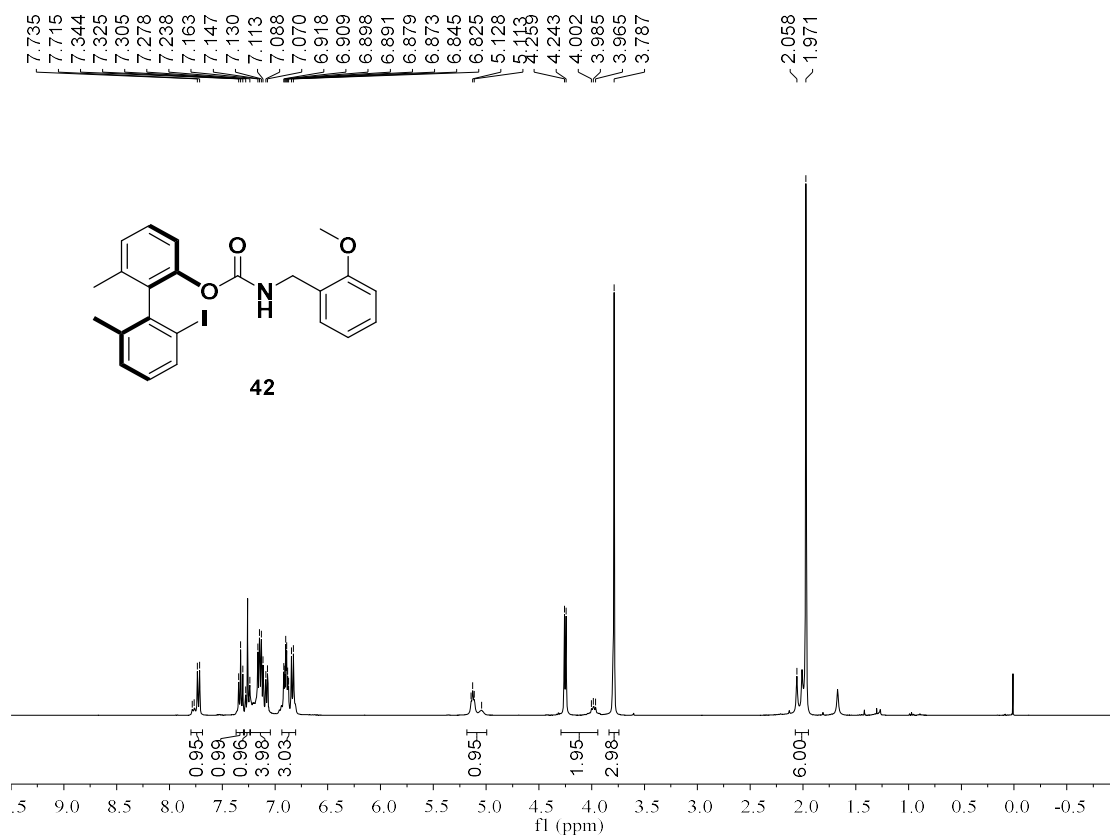

Figure S80. <sup>1</sup>H NMR Spectrum of 42

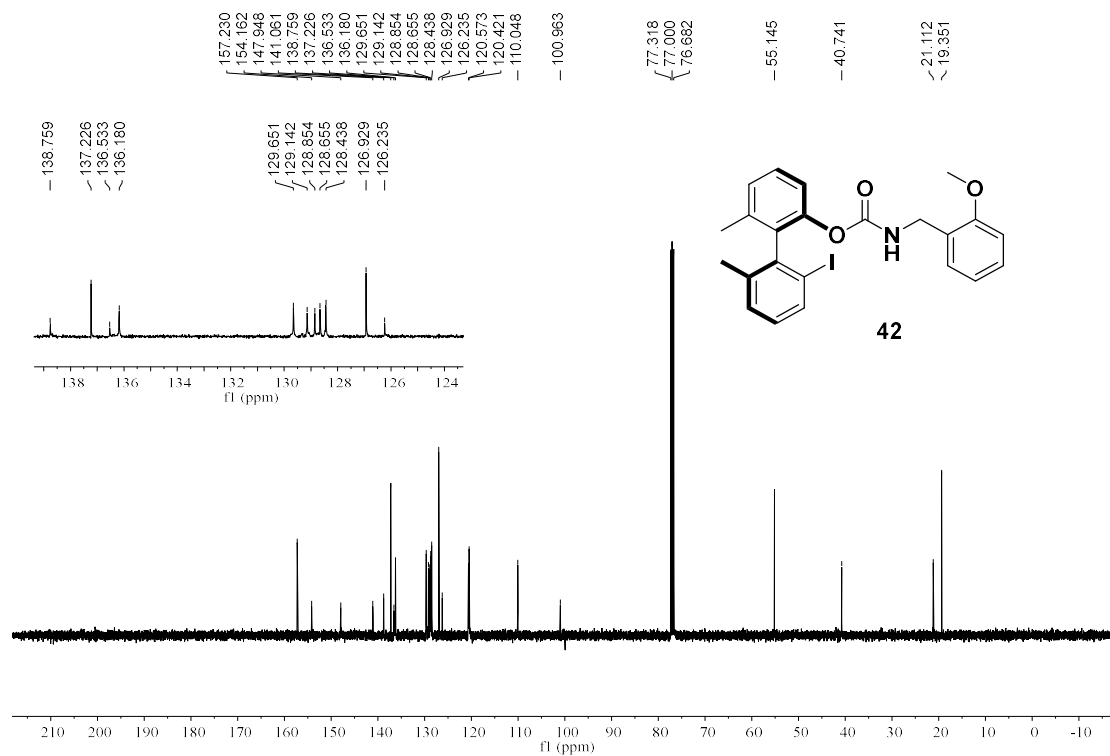

Figure S81. <sup>13</sup>C NMR Spectrum of 42

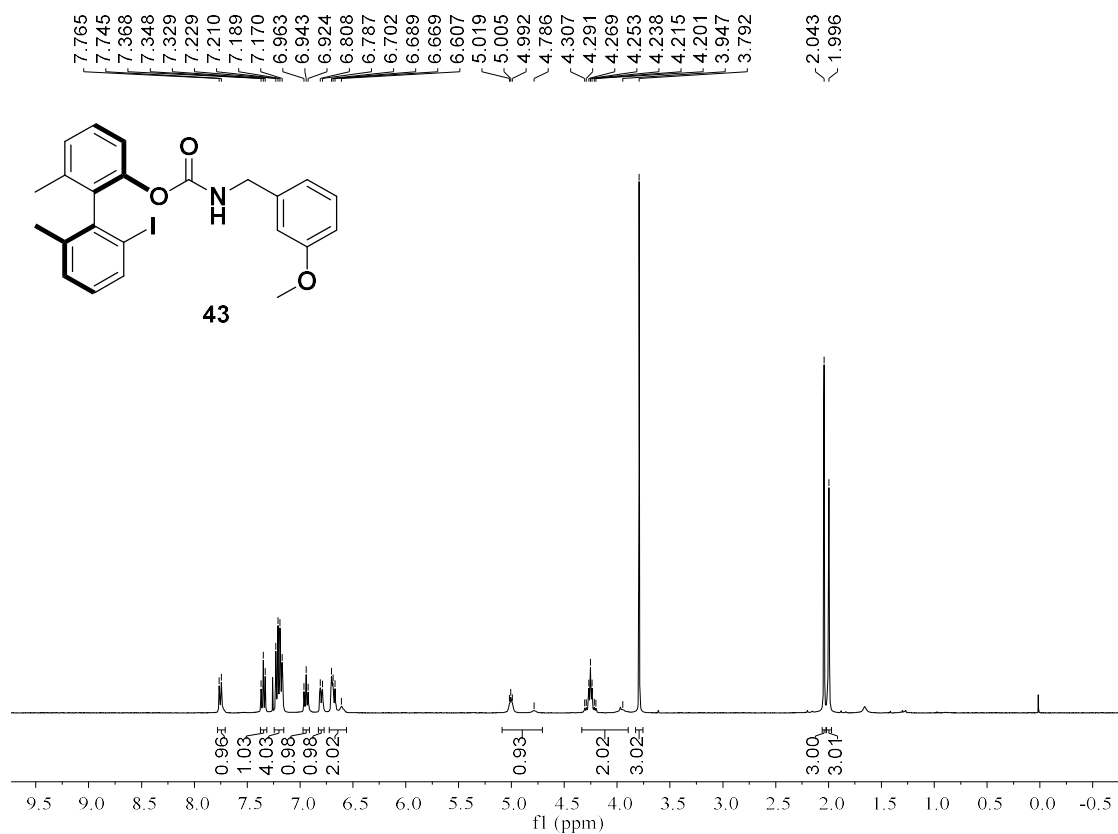

**Figure S82.** <sup>1</sup>H NMR Spectrum of **43**

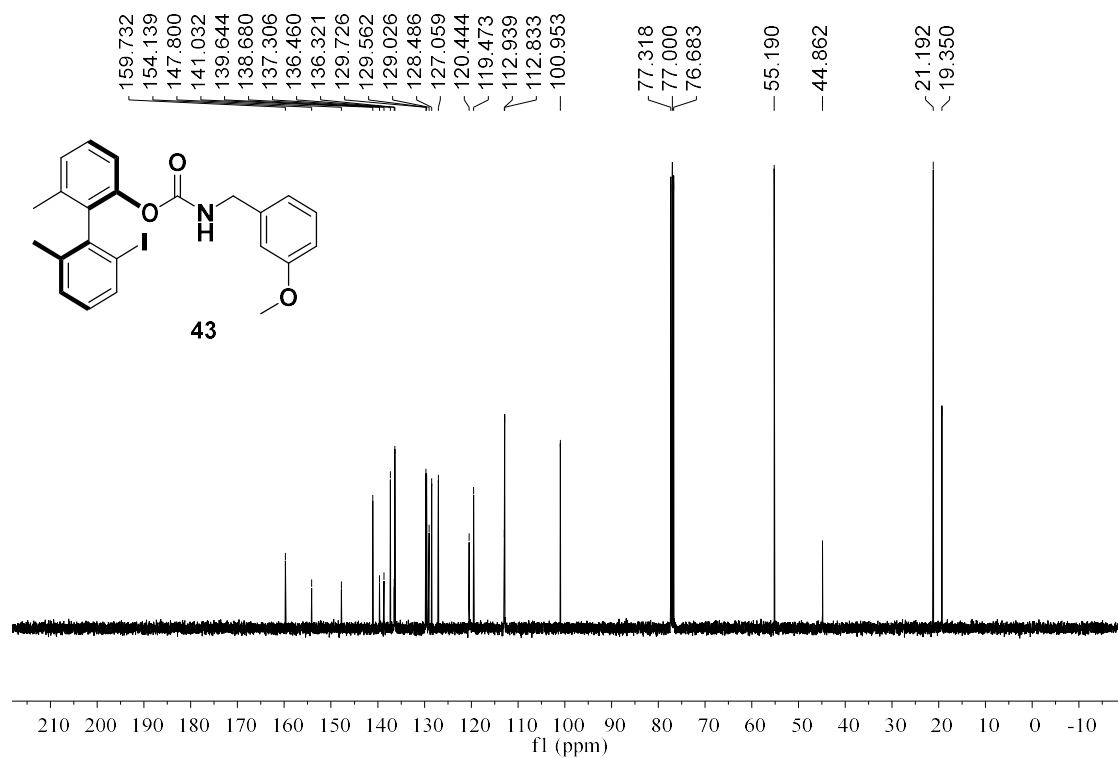

**Figure S83.** <sup>13</sup>C NMR Spectrum of **43**

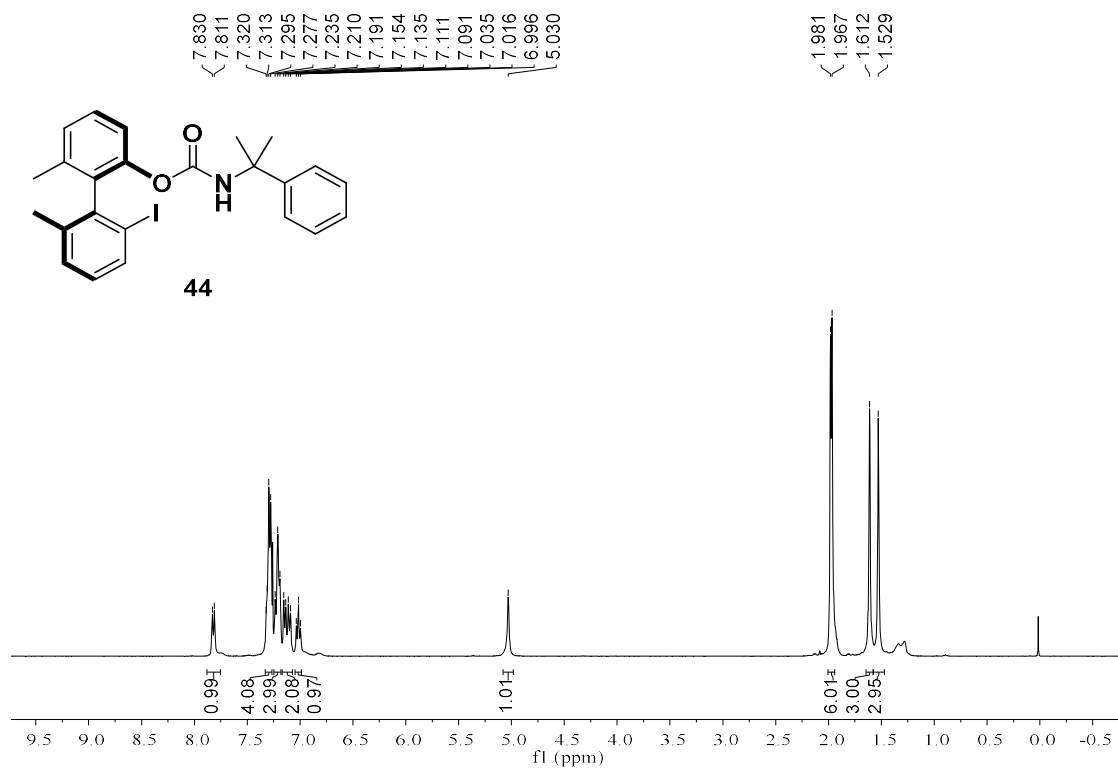

Figure S84.  $^1\text{H}$  NMR Spectrum of **44**

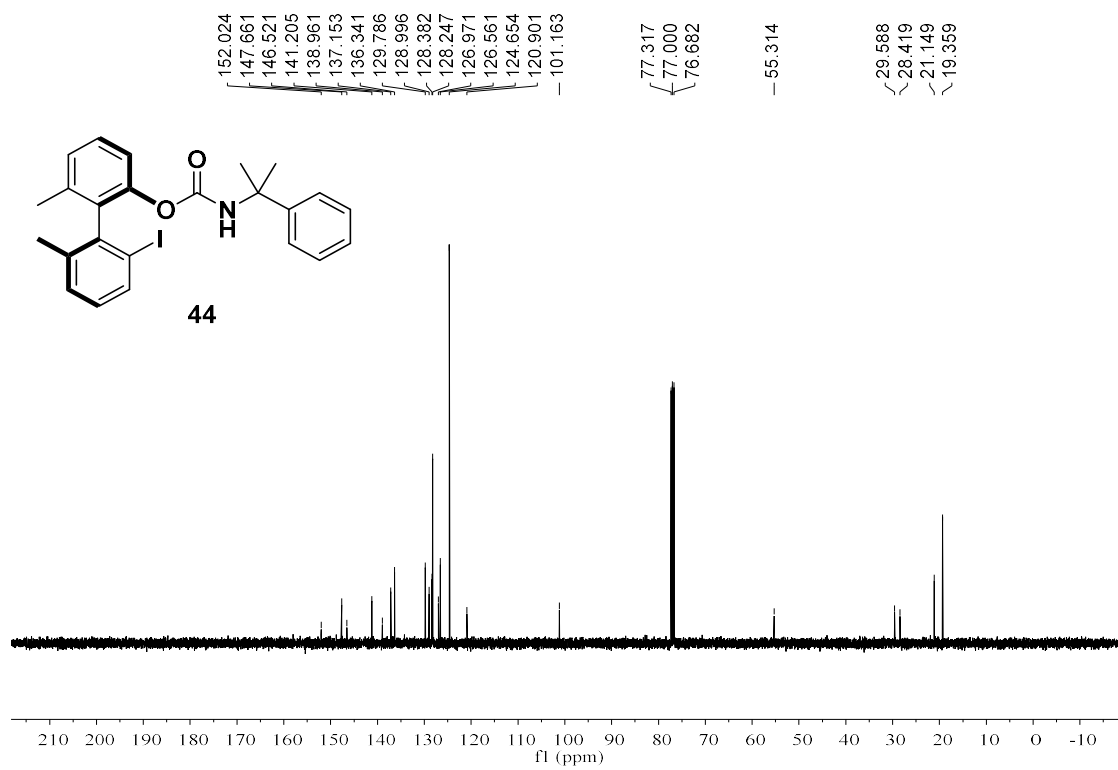

Figure S85.  $^{13}\text{C}$  NMR Spectrum of **44**

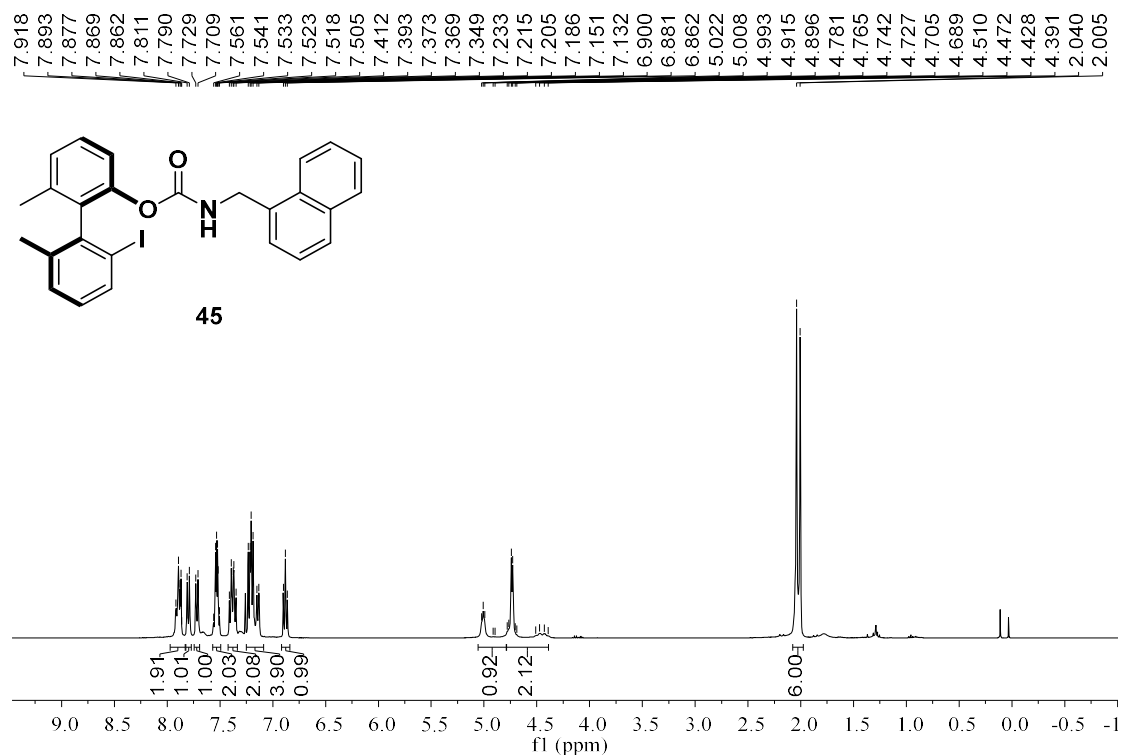

Figure S86. <sup>1</sup>H NMR Spectrum of **45**

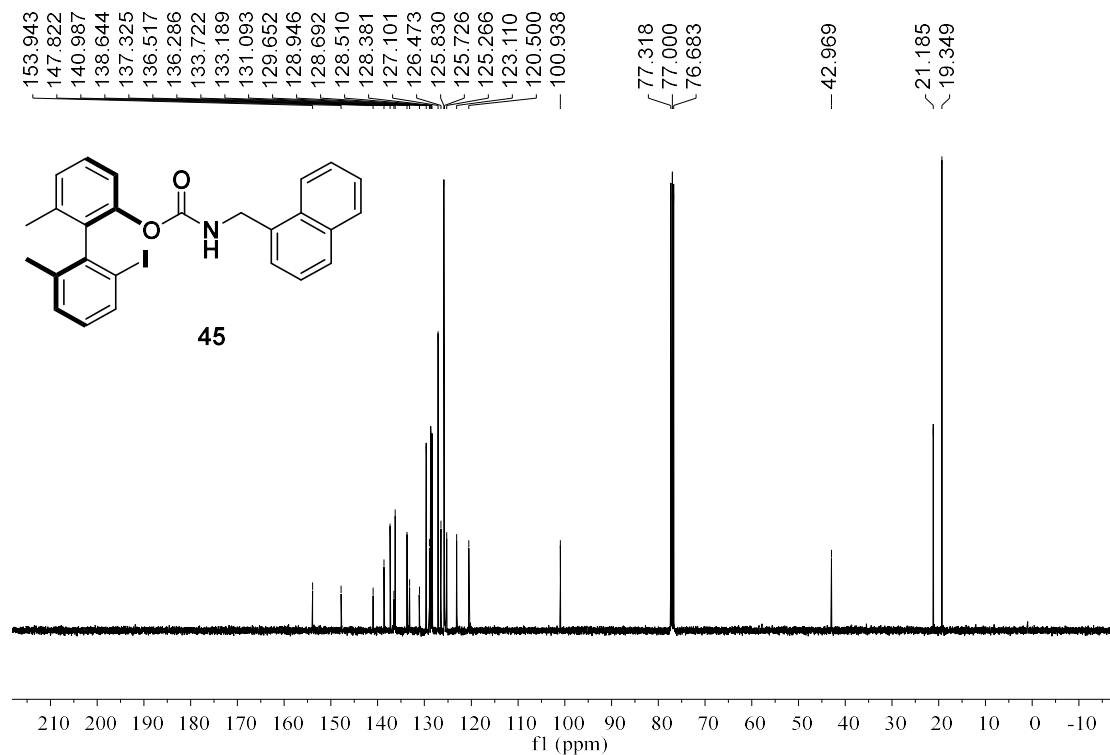

Figure S87. <sup>13</sup>C NMR Spectrum of **45**

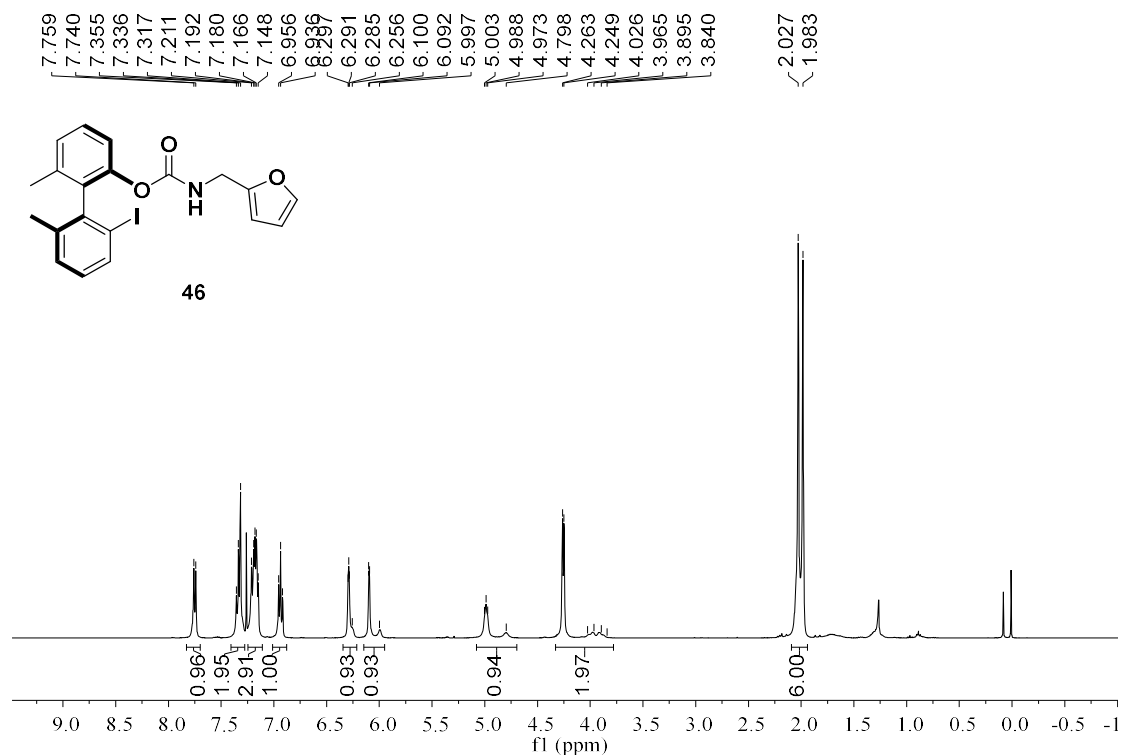

Figure S88. <sup>1</sup>H NMR Spectrum of 46

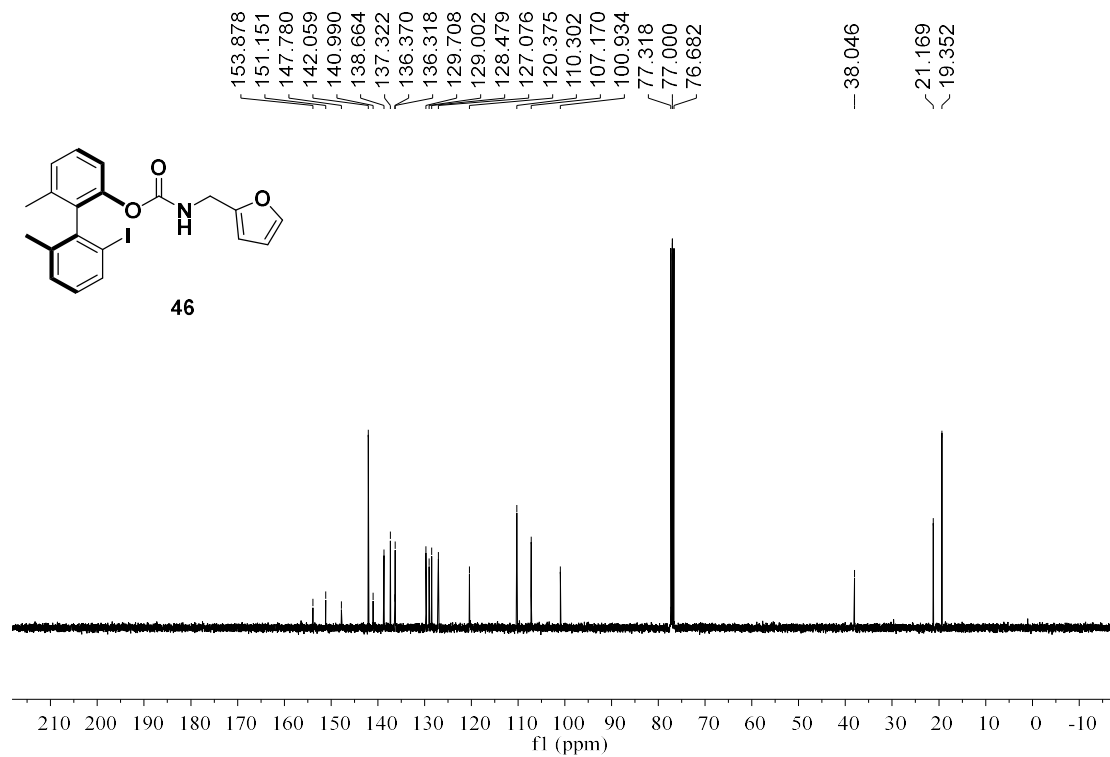

Figure S89. <sup>13</sup>C NMR Spectrum of 46

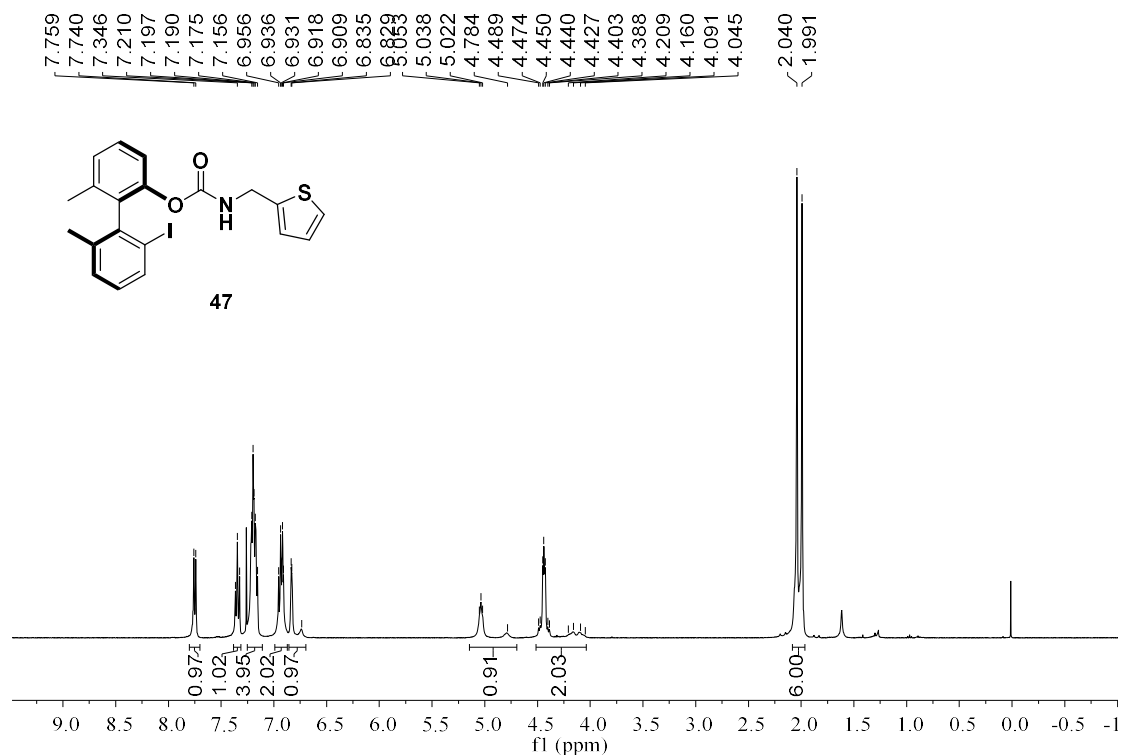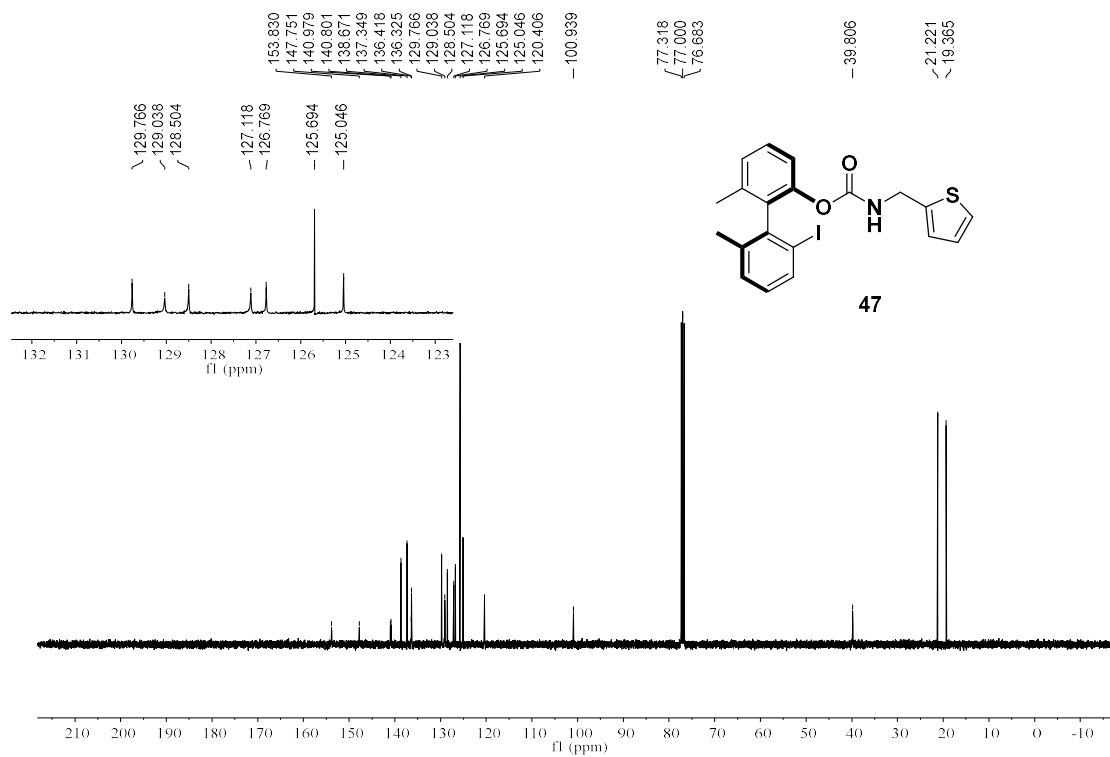

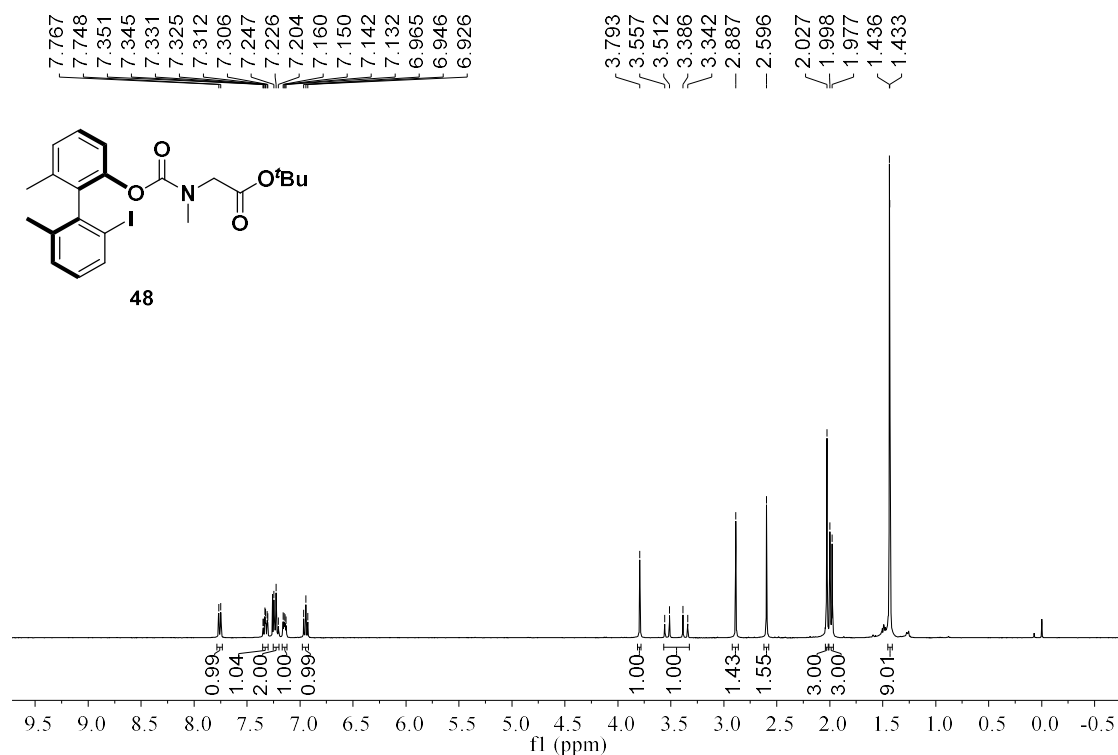

Figure S92. <sup>1</sup>H NMR Spectrum of 48

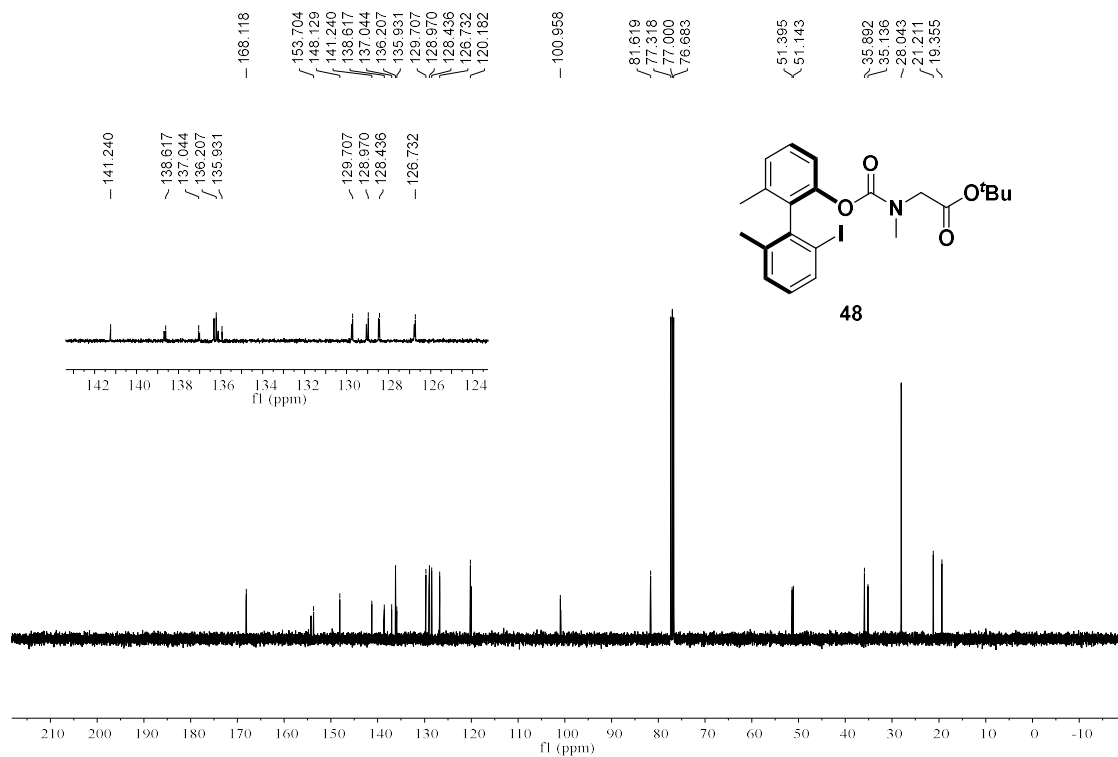

Figure S93. <sup>13</sup>C NMR Spectrum of 48



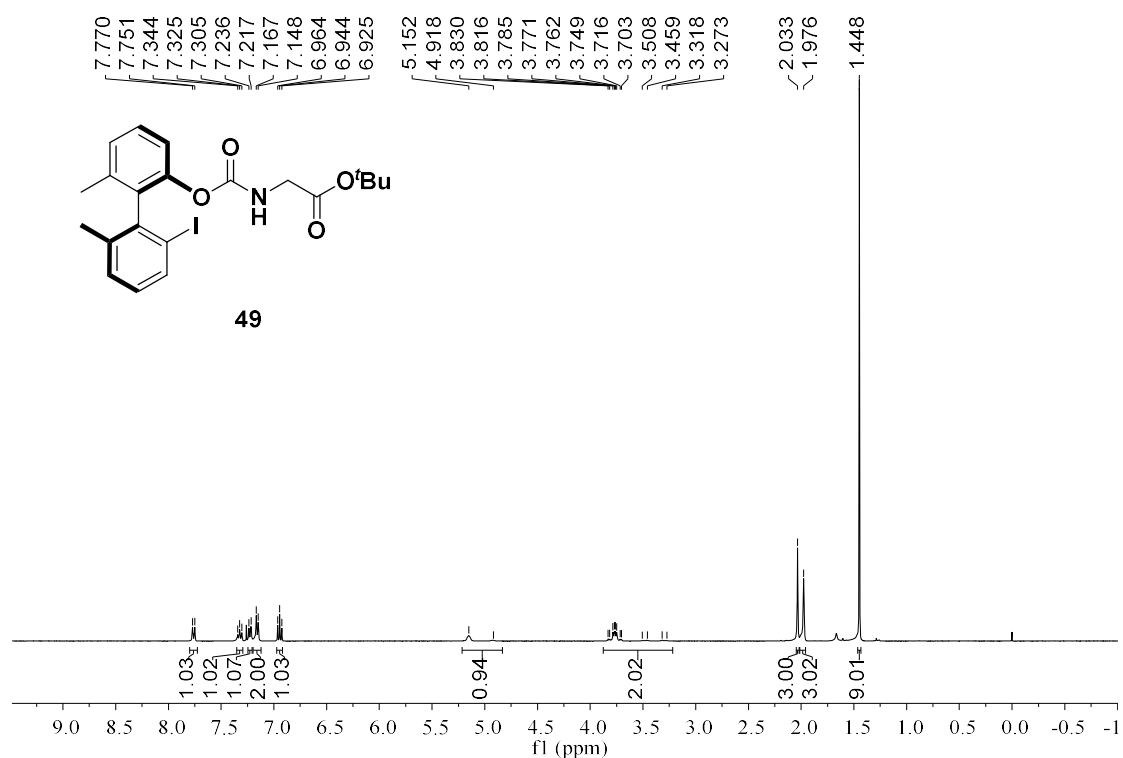

Figure S94. <sup>1</sup>H NMR Spectrum of **49**

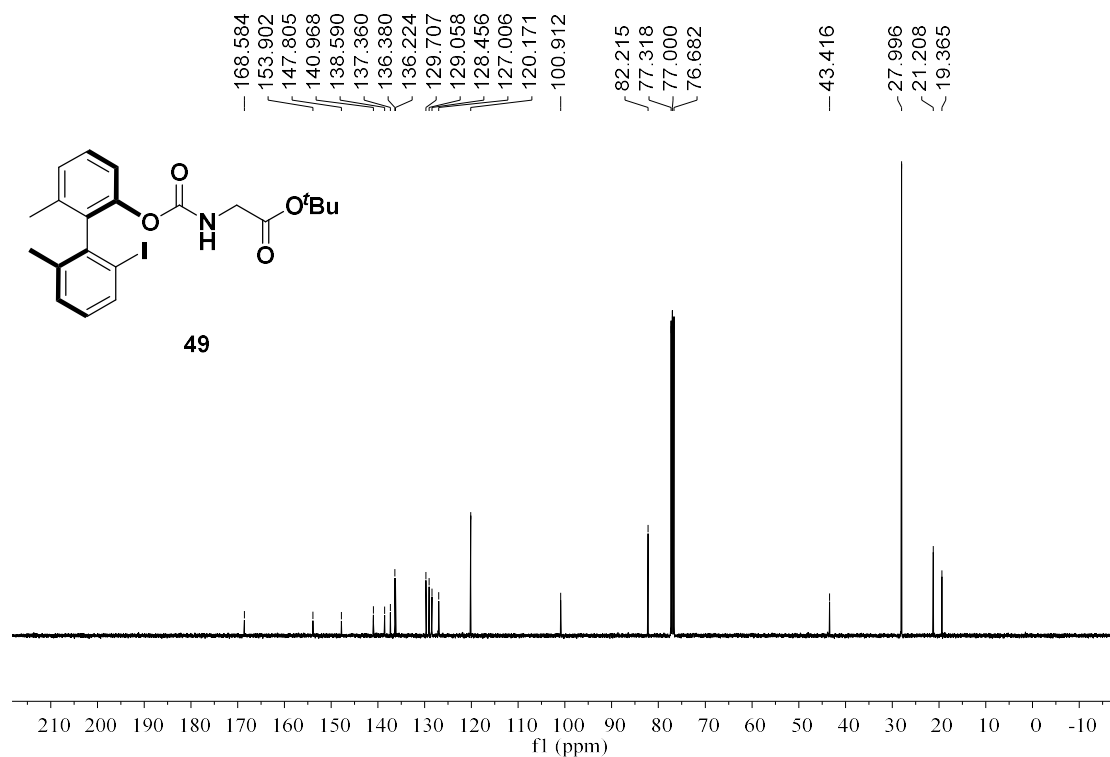

Figure S95. <sup>13</sup>C NMR Spectrum of **49**

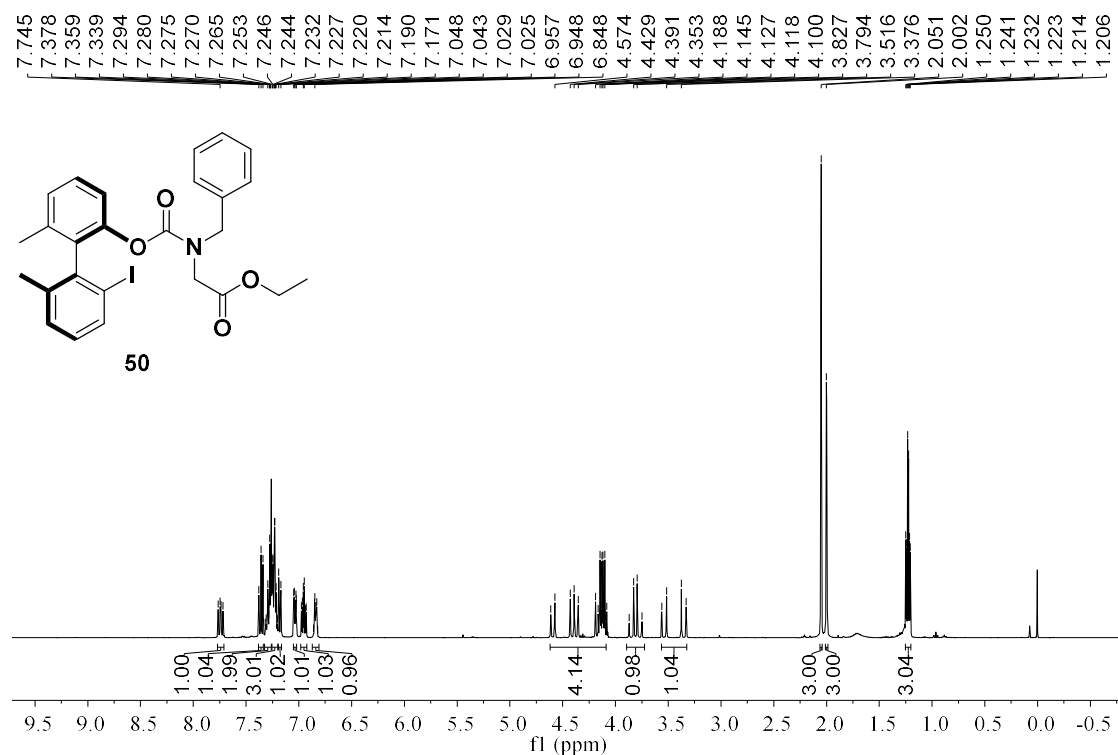

Figure S96. <sup>1</sup>H NMR Spectrum of **50**

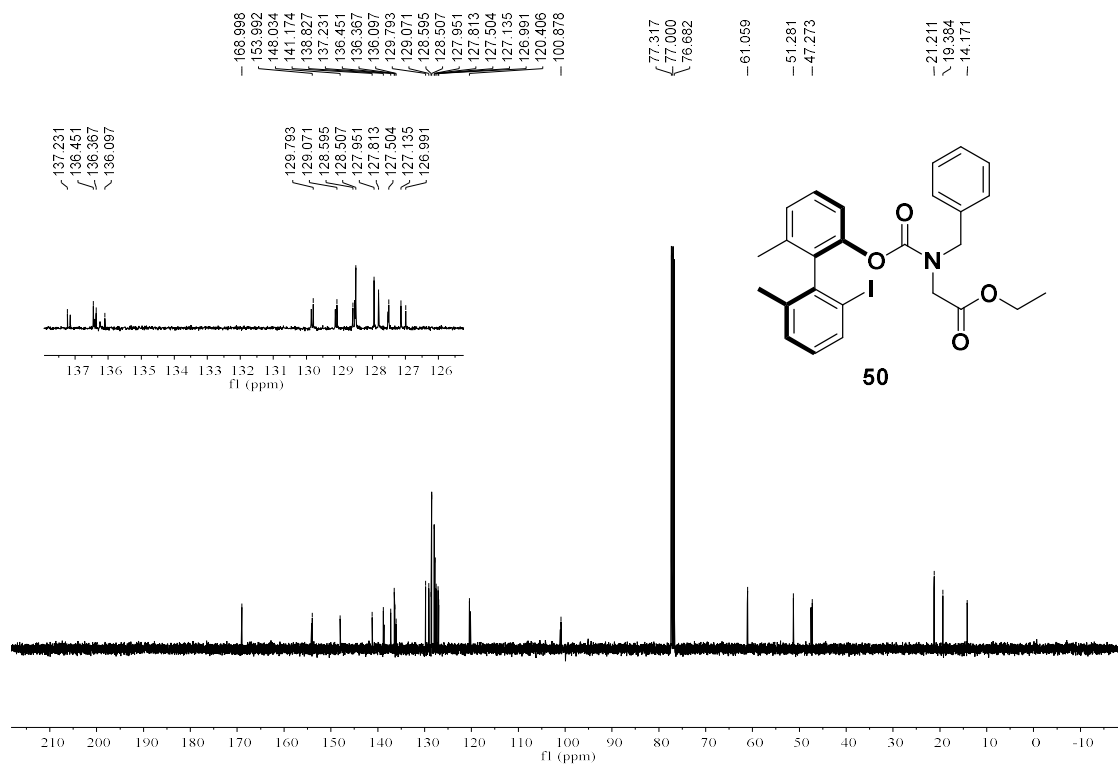

Figure S97. <sup>13</sup>C NMR Spectrum of **50**

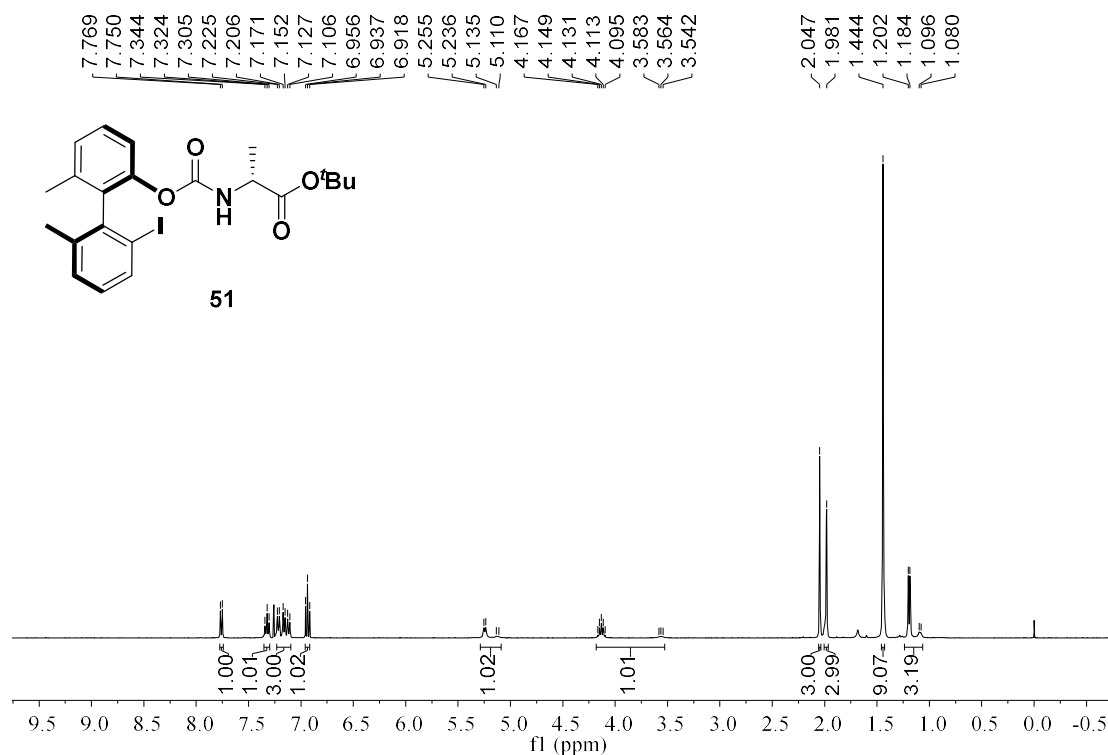

Figure S98. <sup>1</sup>H NMR Spectrum of **51**

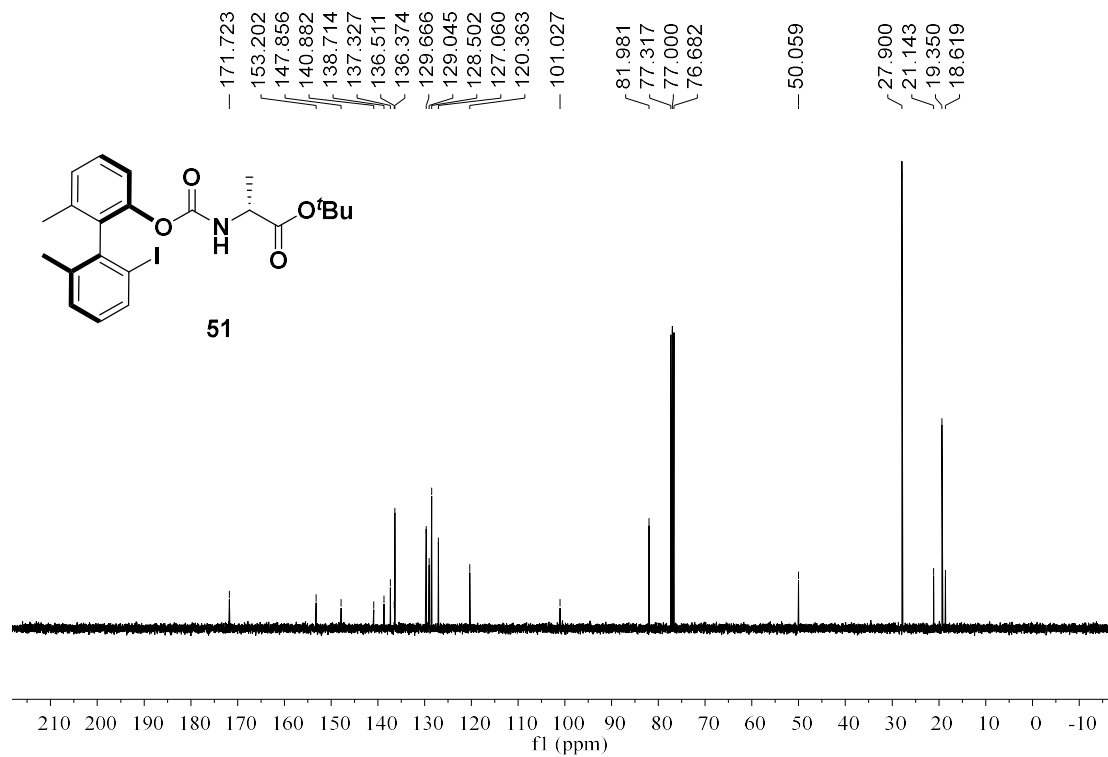

Figure S99. <sup>13</sup>C NMR Spectrum of **51**

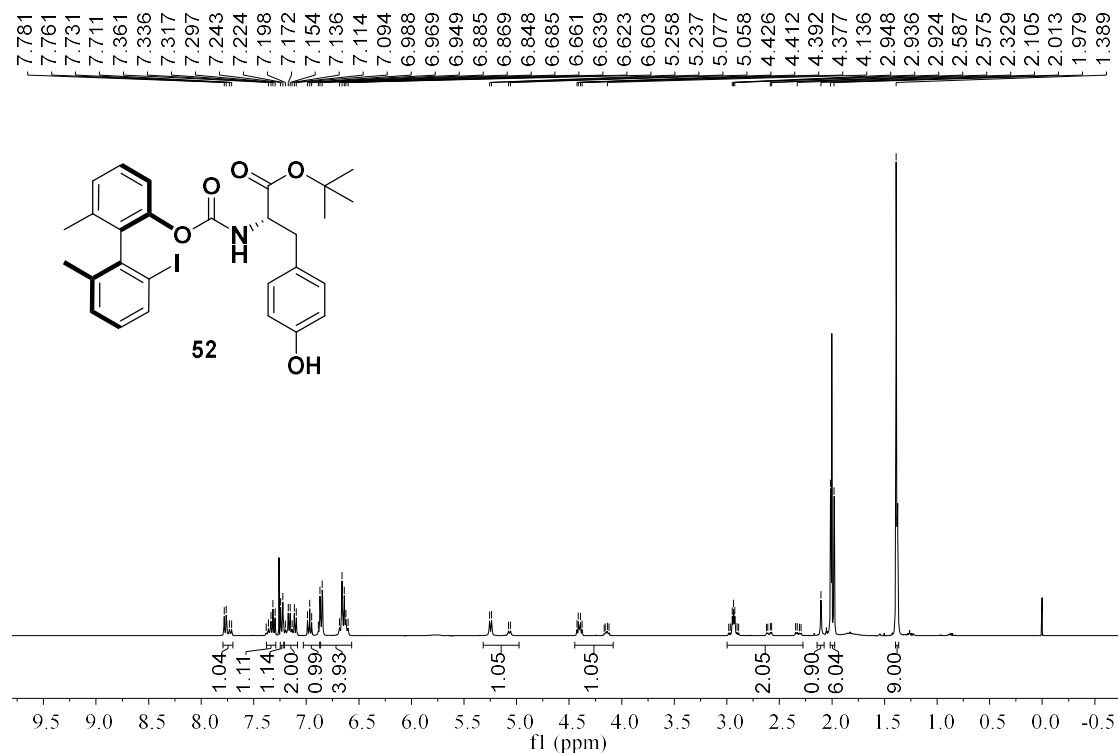

**Figure S100.**  $^1\text{H}$  NMR Spectrum of **52**

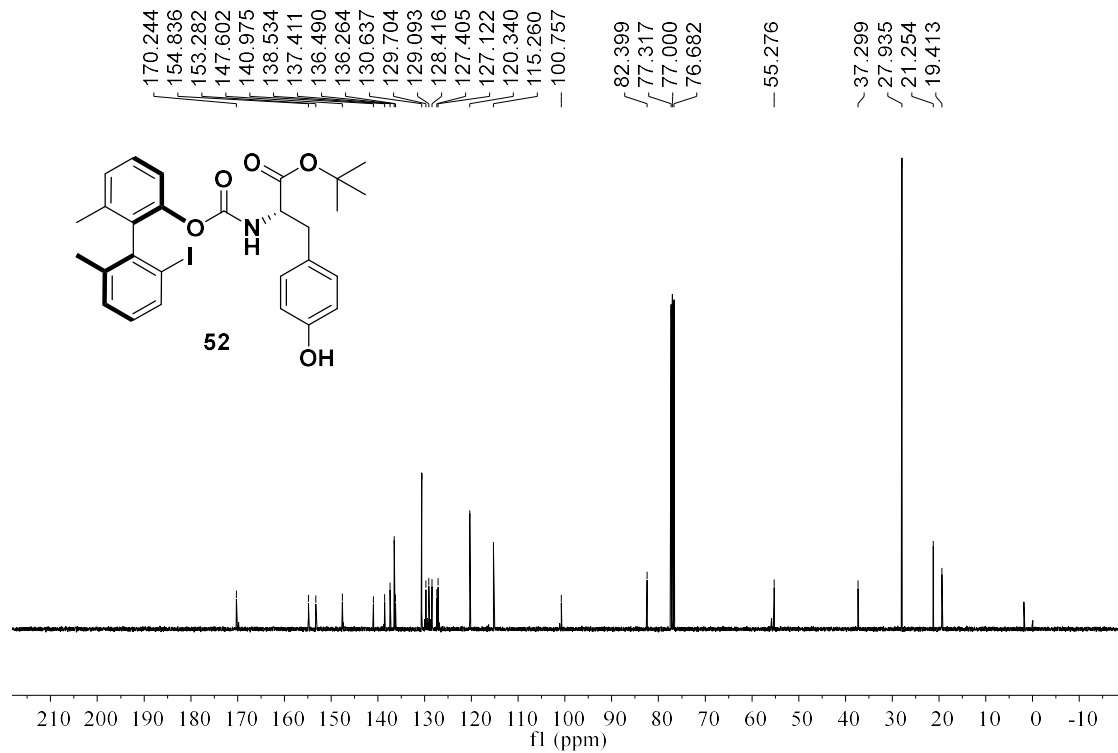

**Figure S101.**  $^{13}\text{C}$  NMR Spectrum of **52**

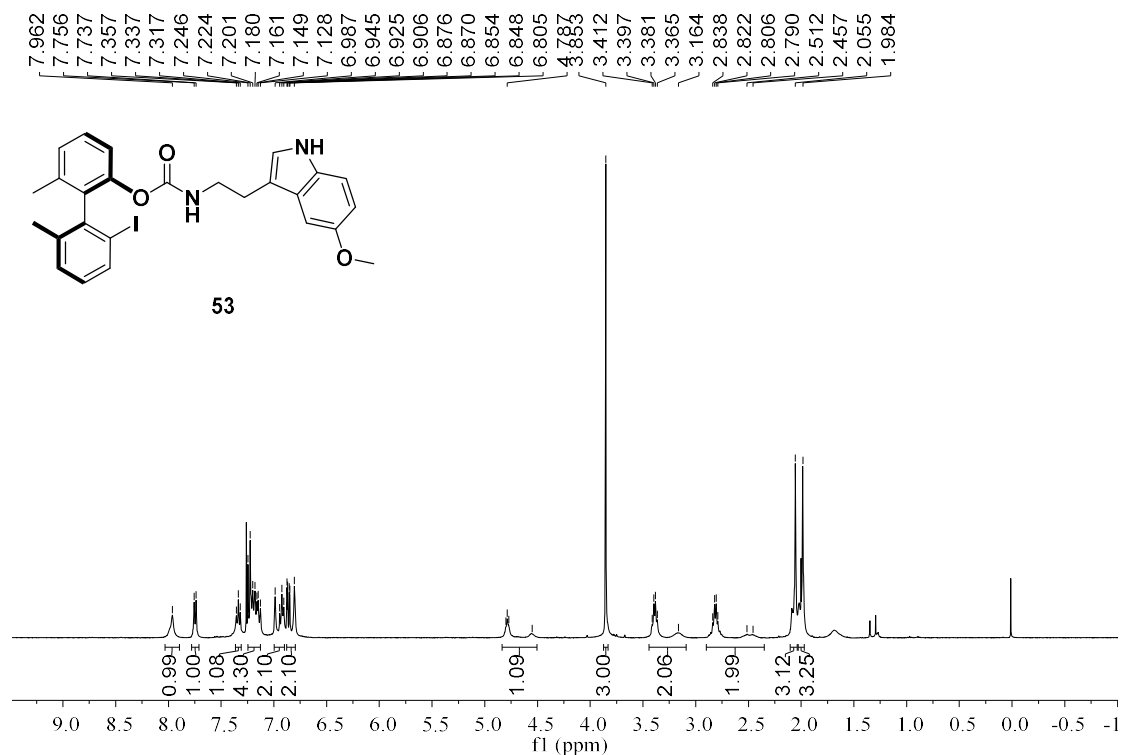

Figure S102. <sup>1</sup>H NMR Spectrum of **53**

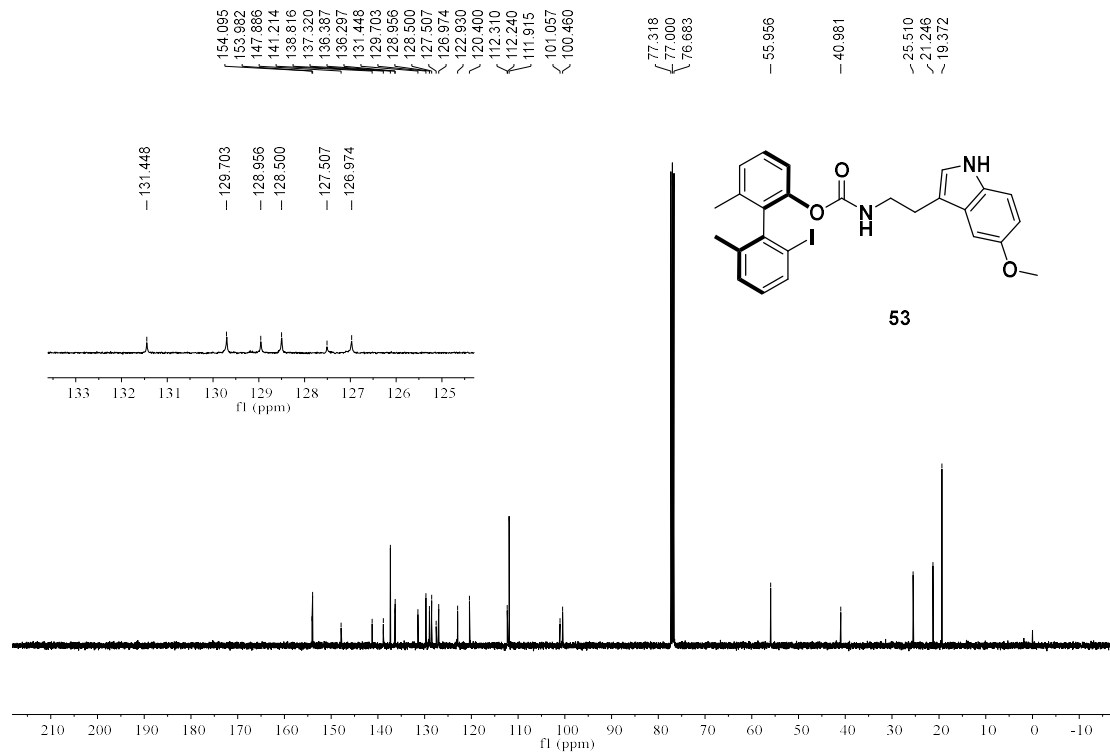

Figure S103. <sup>13</sup>C NMR Spectrum of **53**

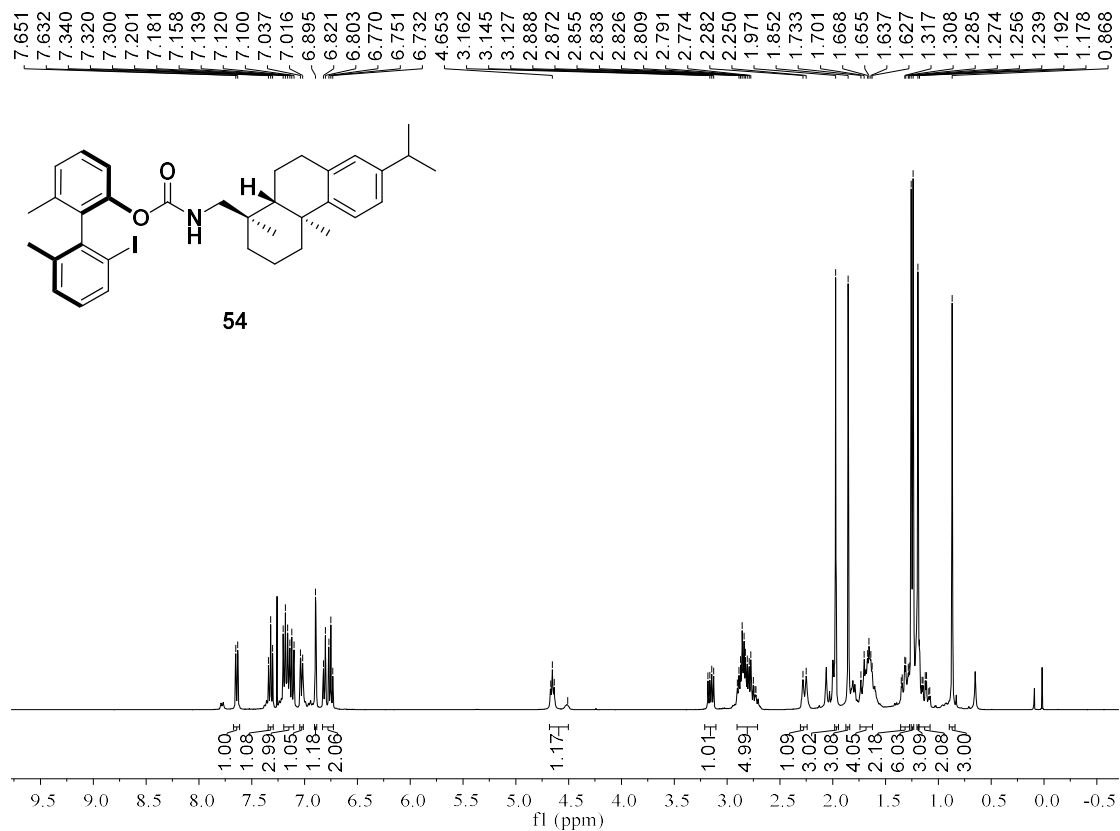

**Figure S104. <sup>1</sup>H NMR Spectrum of 54**

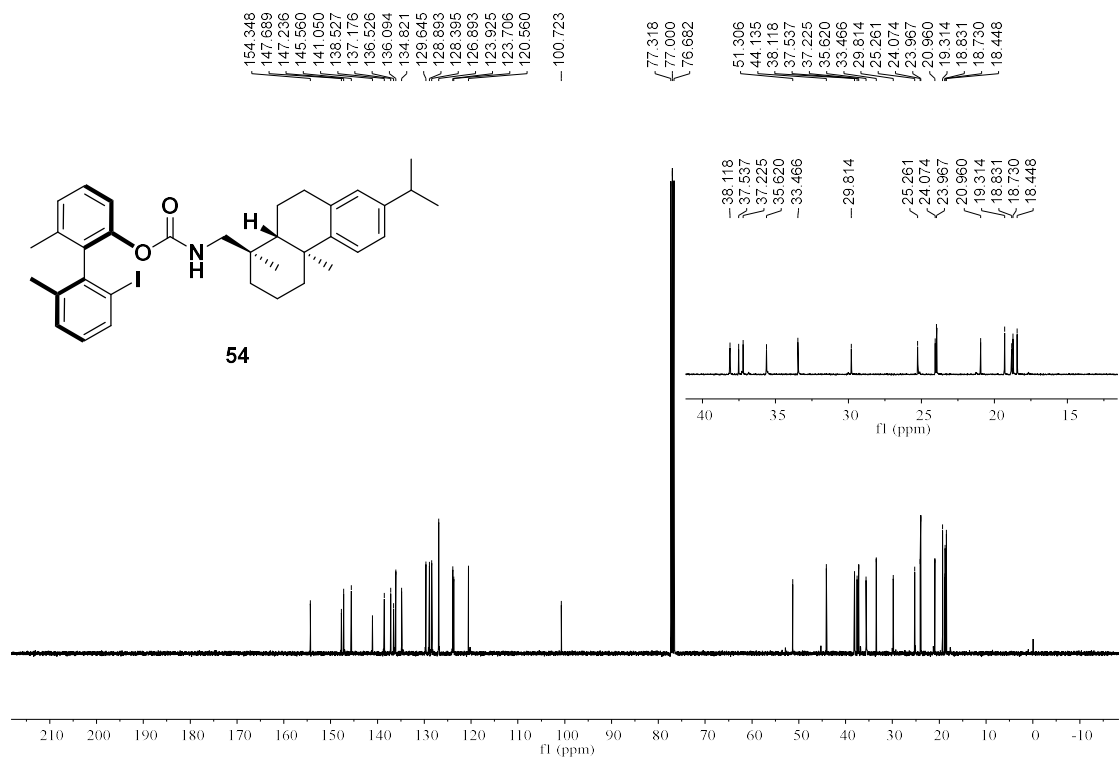

**Figure S105. <sup>13</sup>C NMR Spectrum of 54**

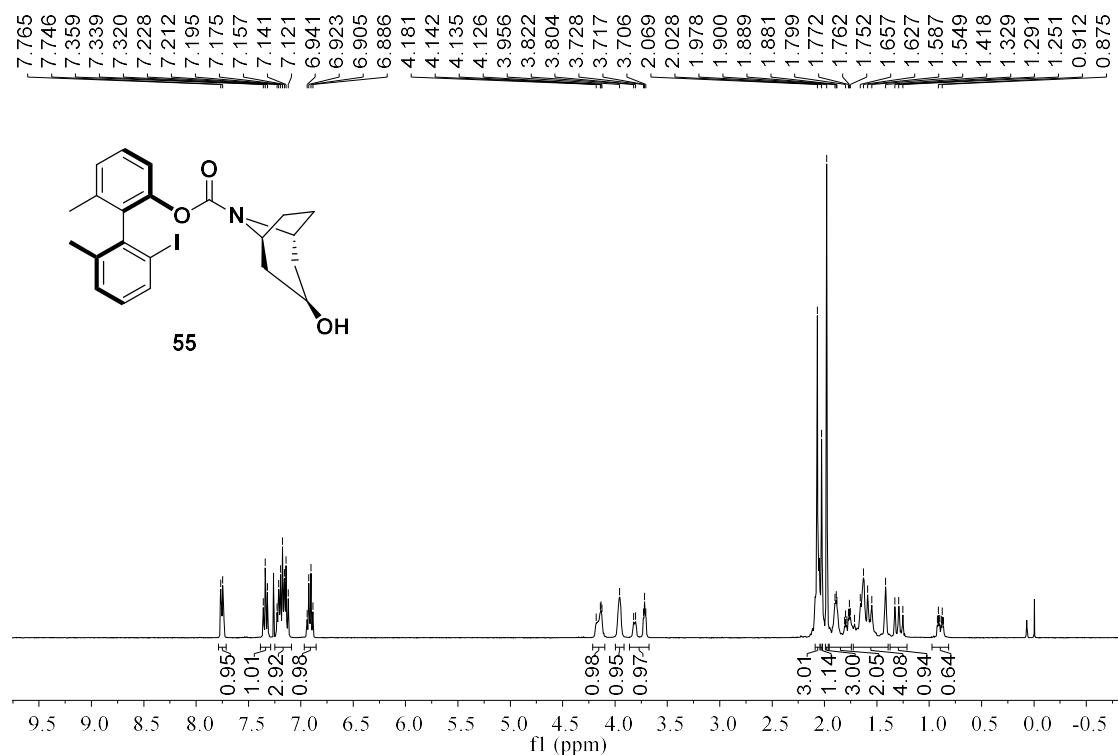

**Figure S106. <sup>1</sup>H NMR Spectrum of 55**

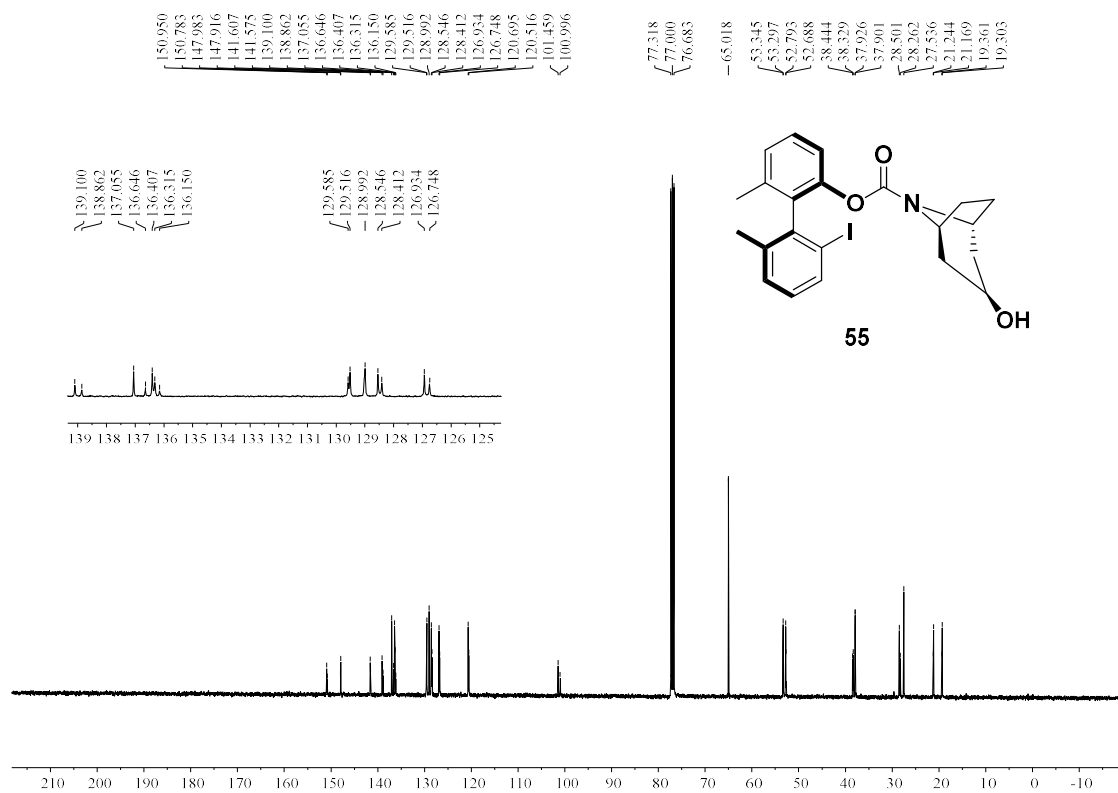

**Figure S107. <sup>13</sup>C NMR Spectrum of 55**

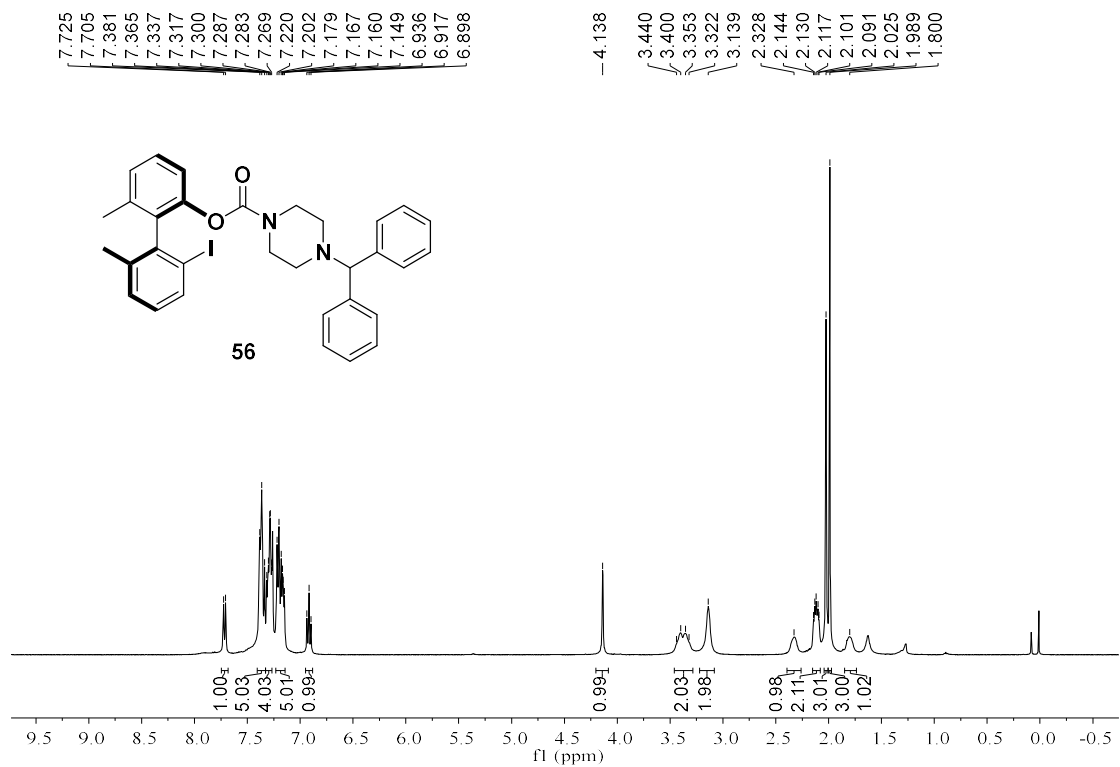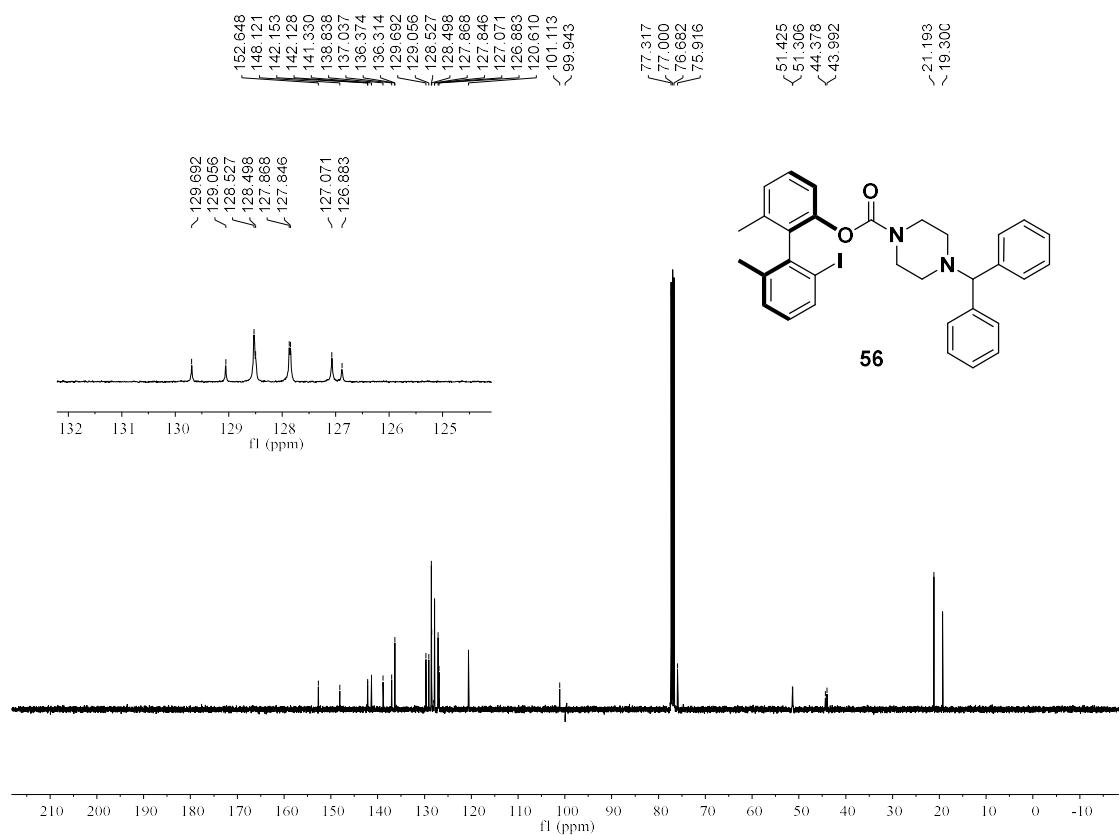



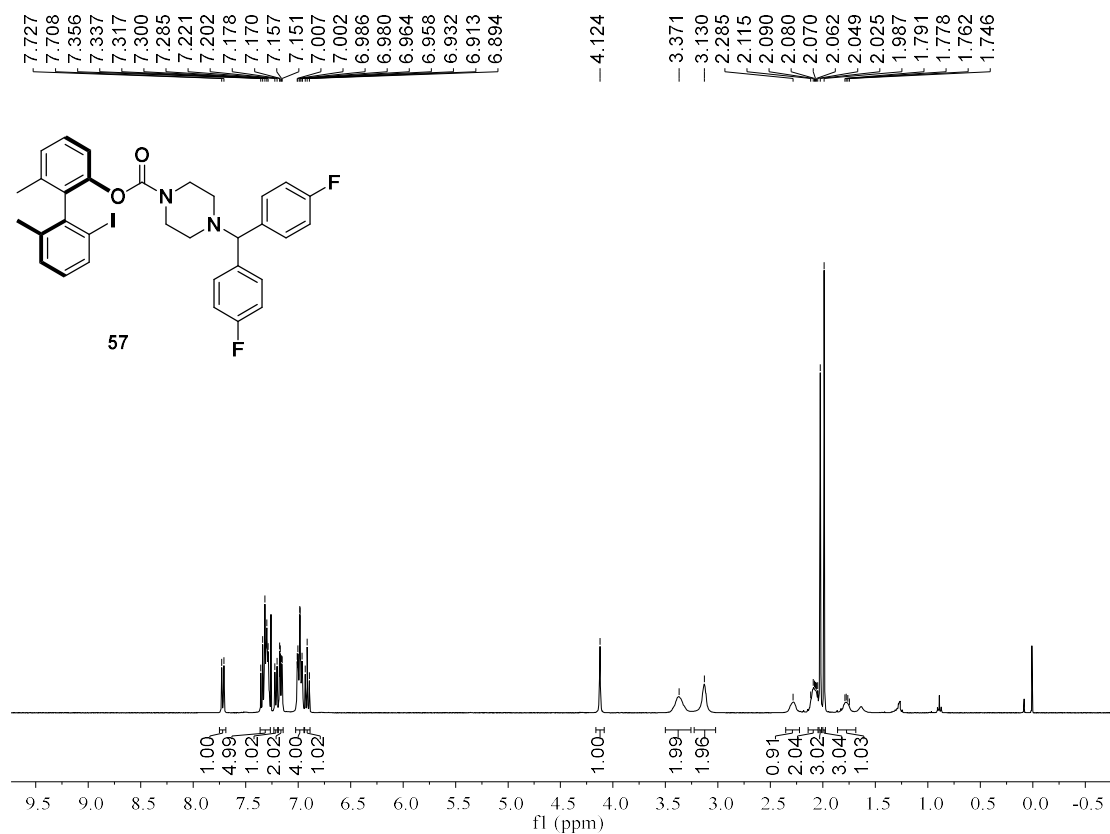

Figure S110.  $^1\text{H}$  NMR Spectrum of **57**

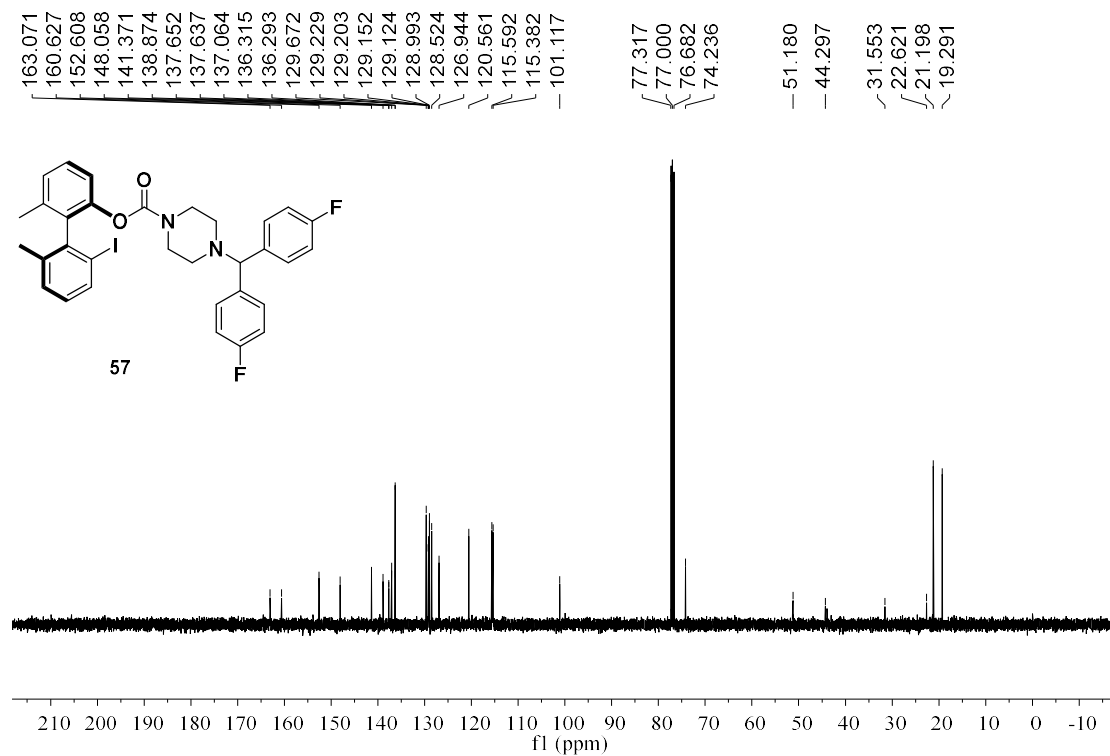

Figure S111.  $^{13}\text{C}$  NMR Spectrum of **57**

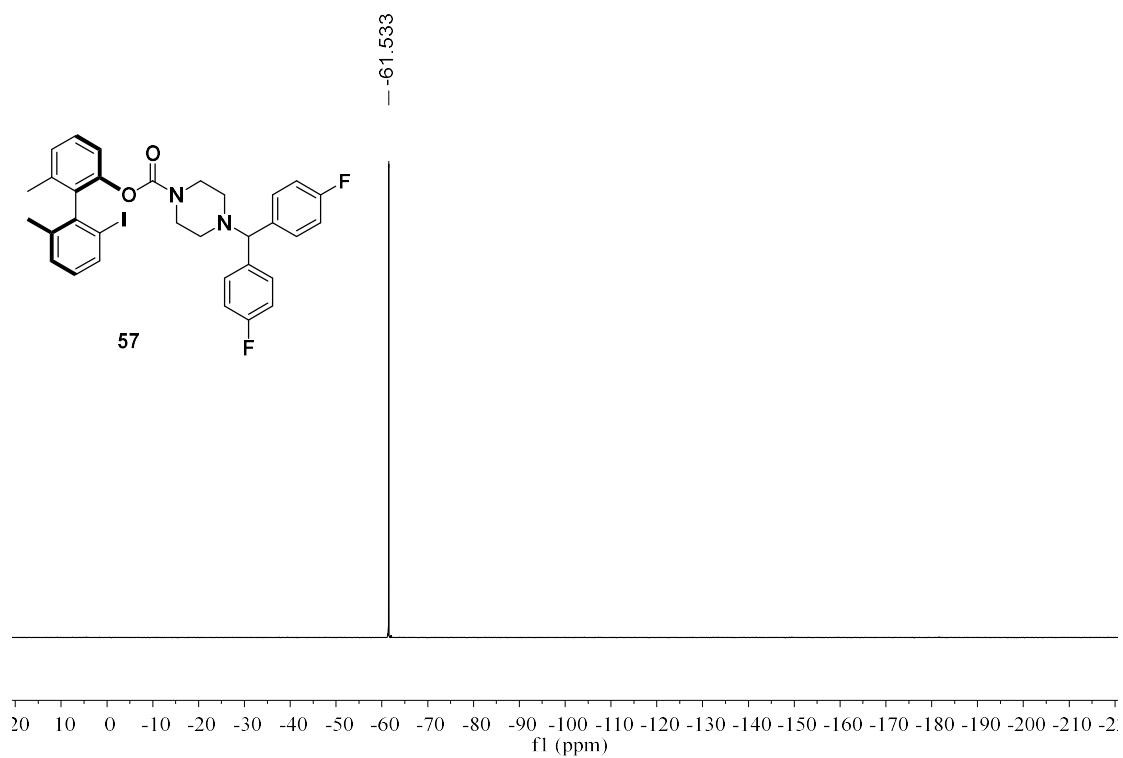

**Figure S112.**  $^{19}\text{F}$  NMR Spectrum of **57**

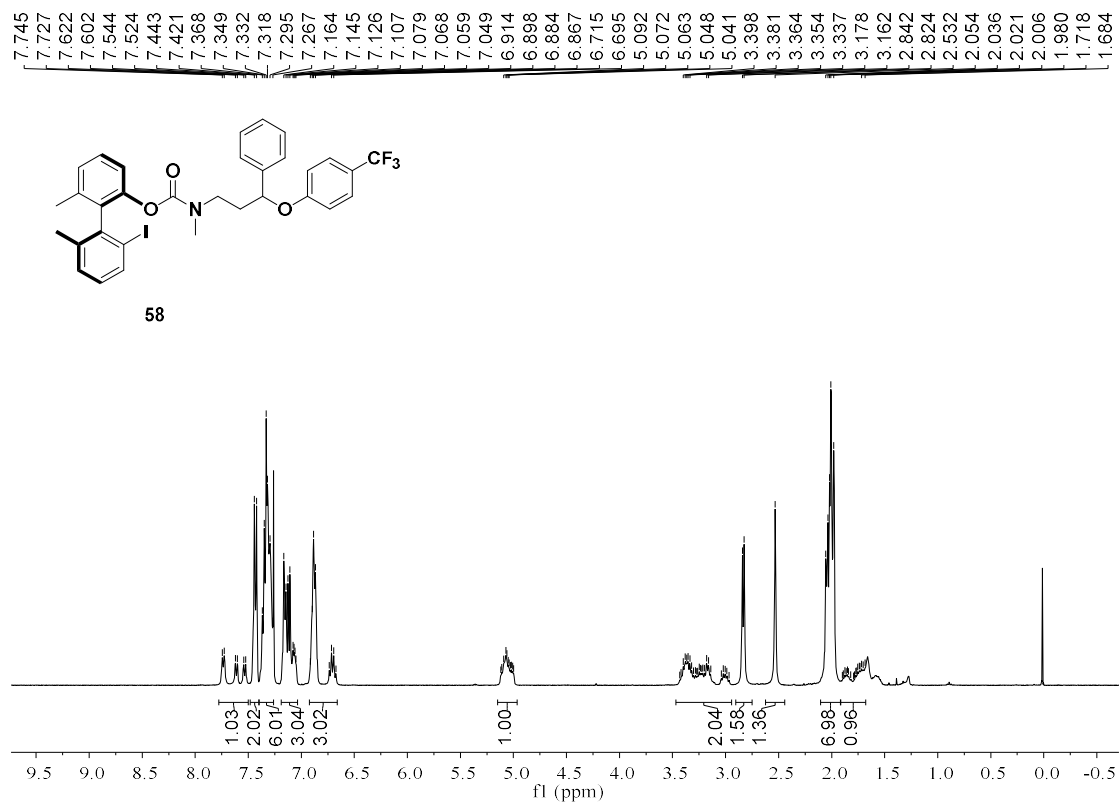

Figure S113.  $^1\text{H}$  NMR Spectrum of **58**

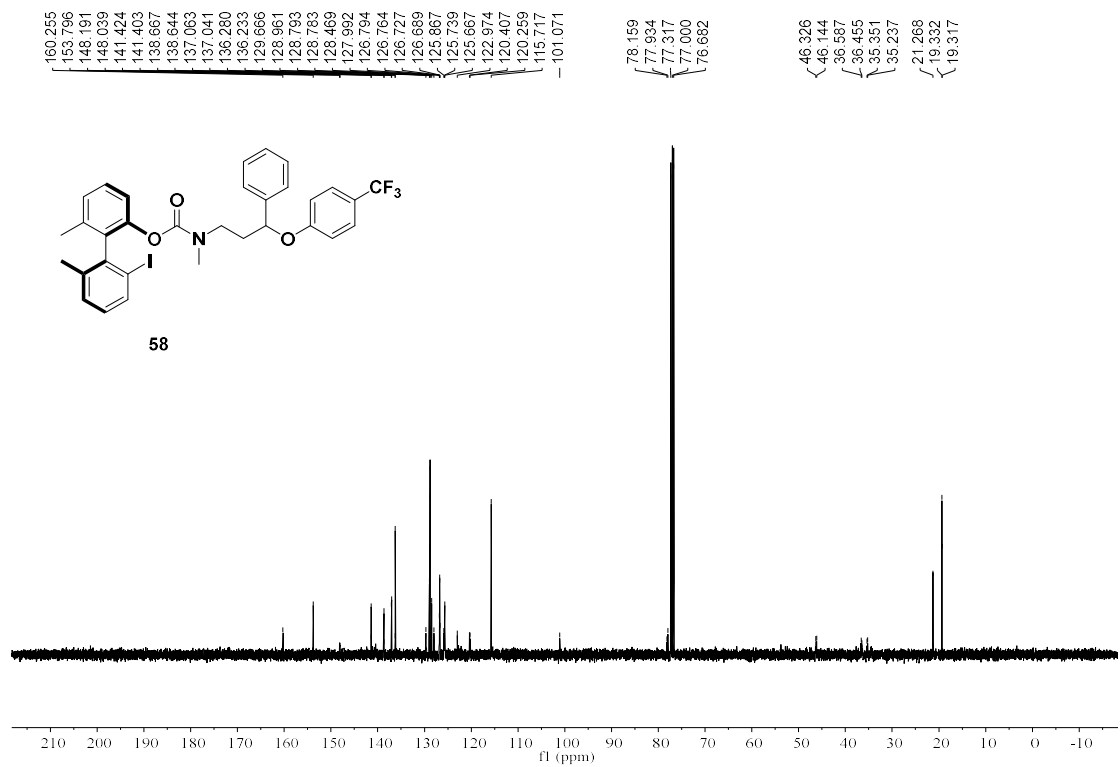

Figure S114.  $^{13}\text{C}$  NMR Spectrum of **58**

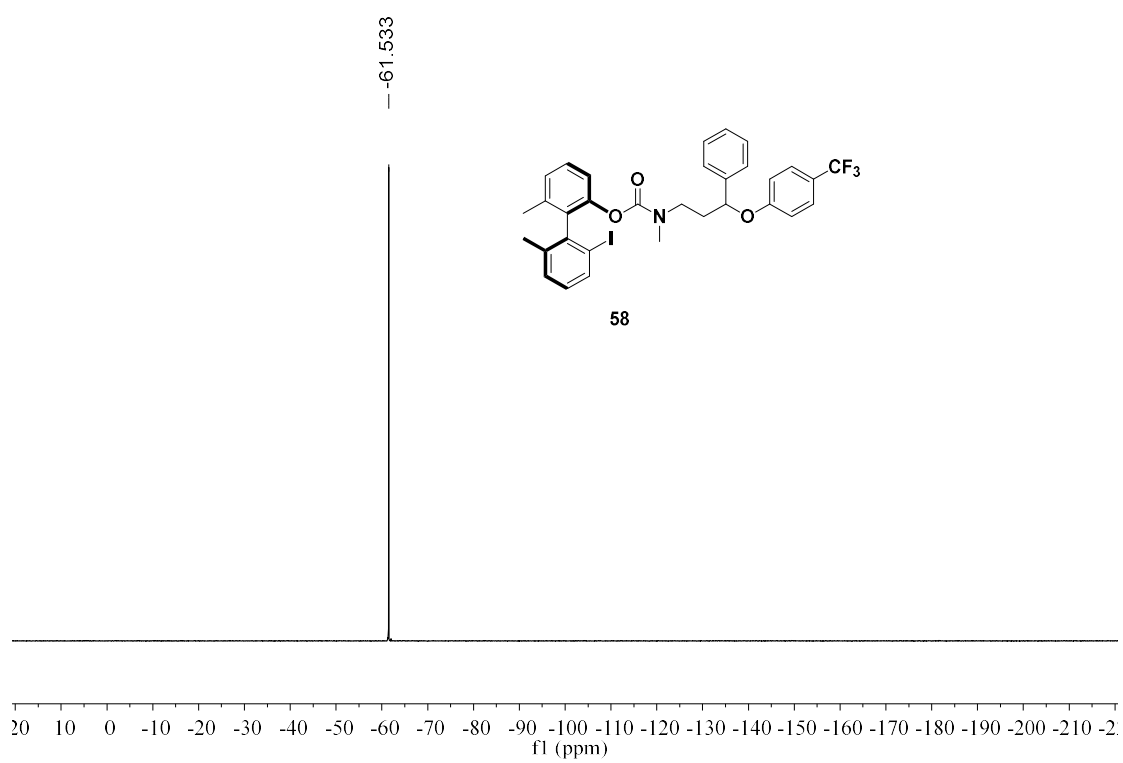

**Figure S115.**  $^{19}\text{F}$  NMR Spectrum of **58**

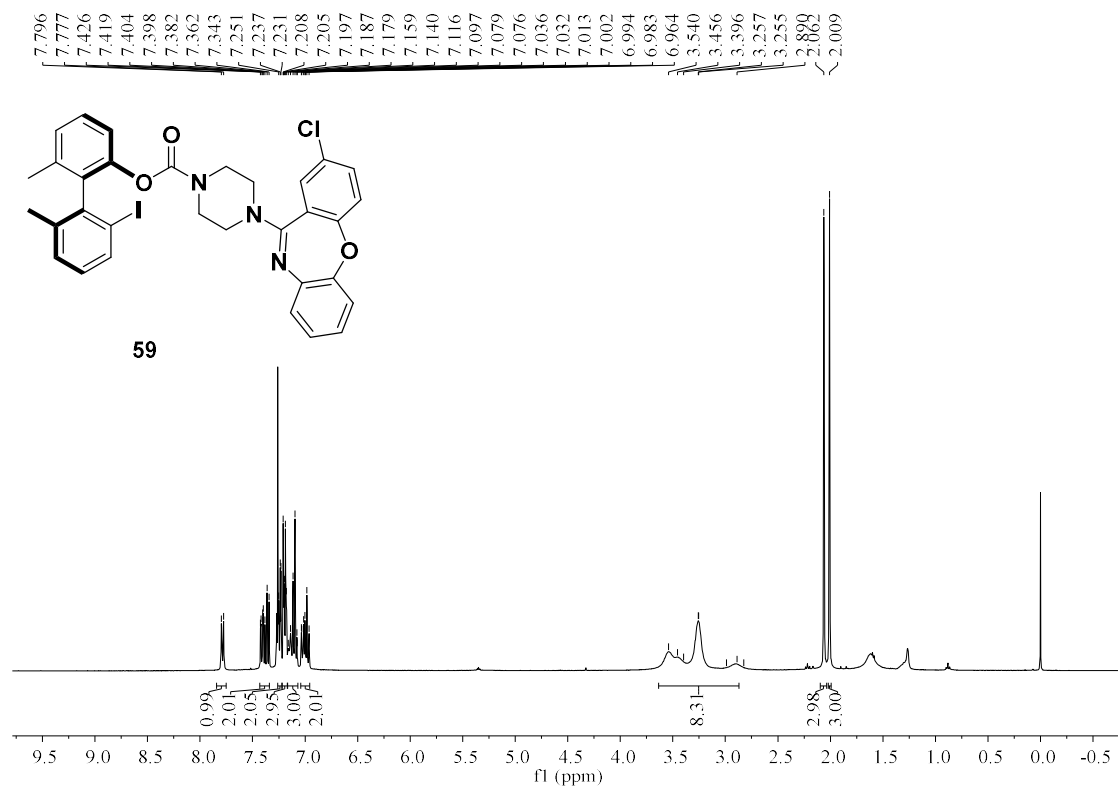

Figure S116. <sup>1</sup>H NMR Spectrum of **59**

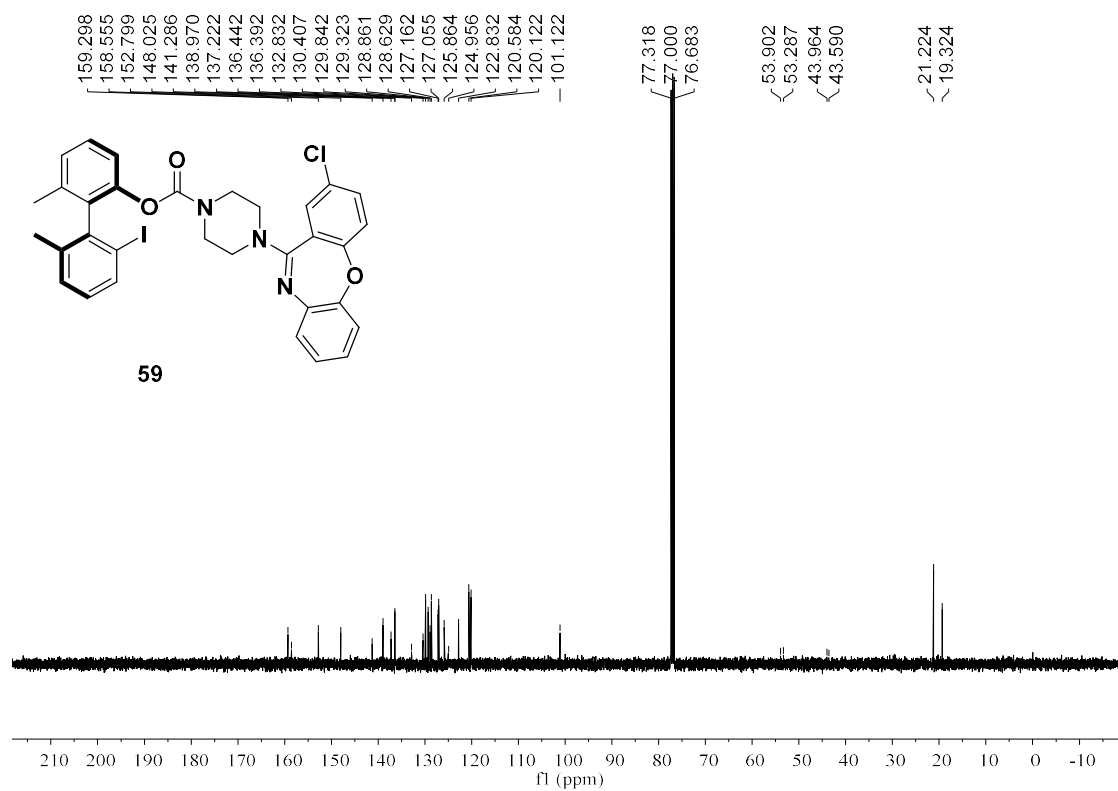

Figure S117. <sup>13</sup>C NMR Spectrum of **59**

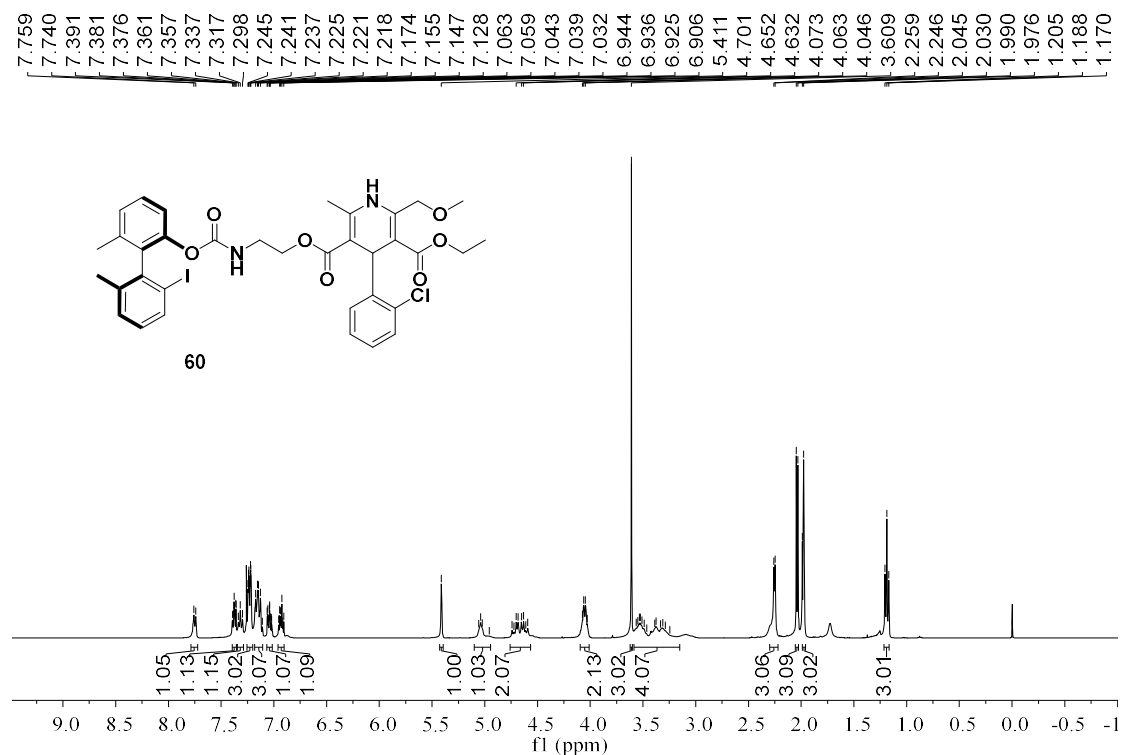

Figure S118.  $^1\text{H NMR}$  Spectrum of **60**

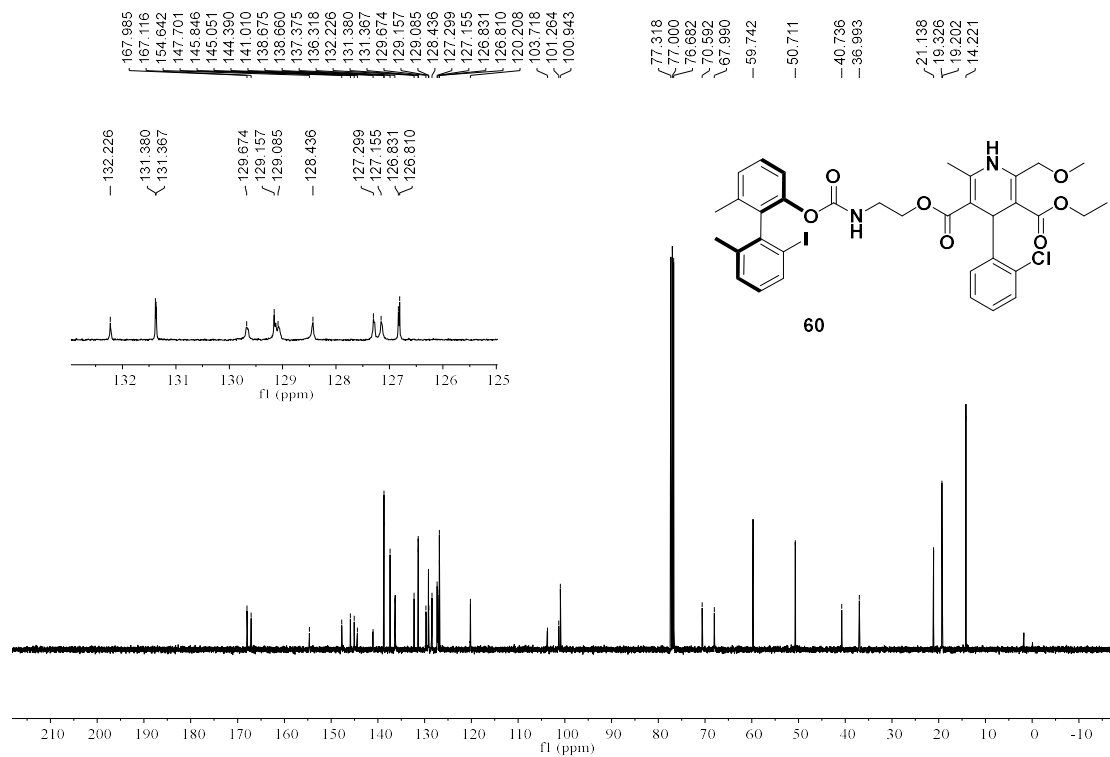

Figure S119.  $^{13}\text{C NMR}$  Spectrum of **60**

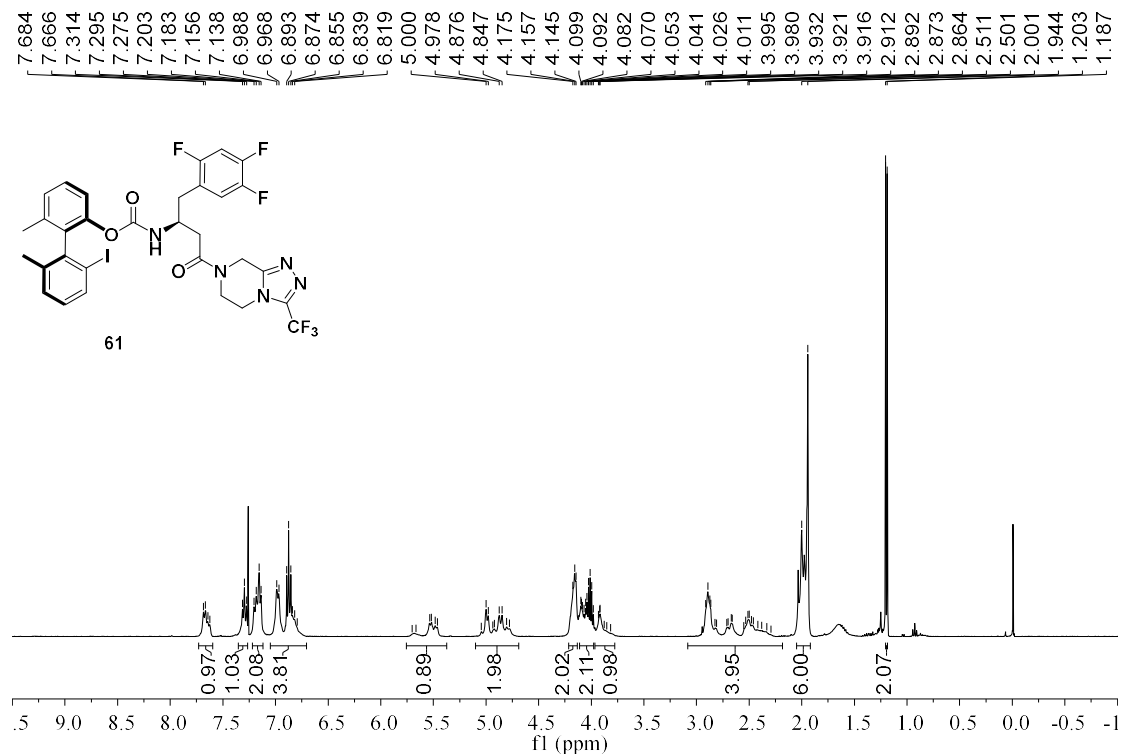

Figure S120. <sup>1</sup>H NMR Spectrum of 61

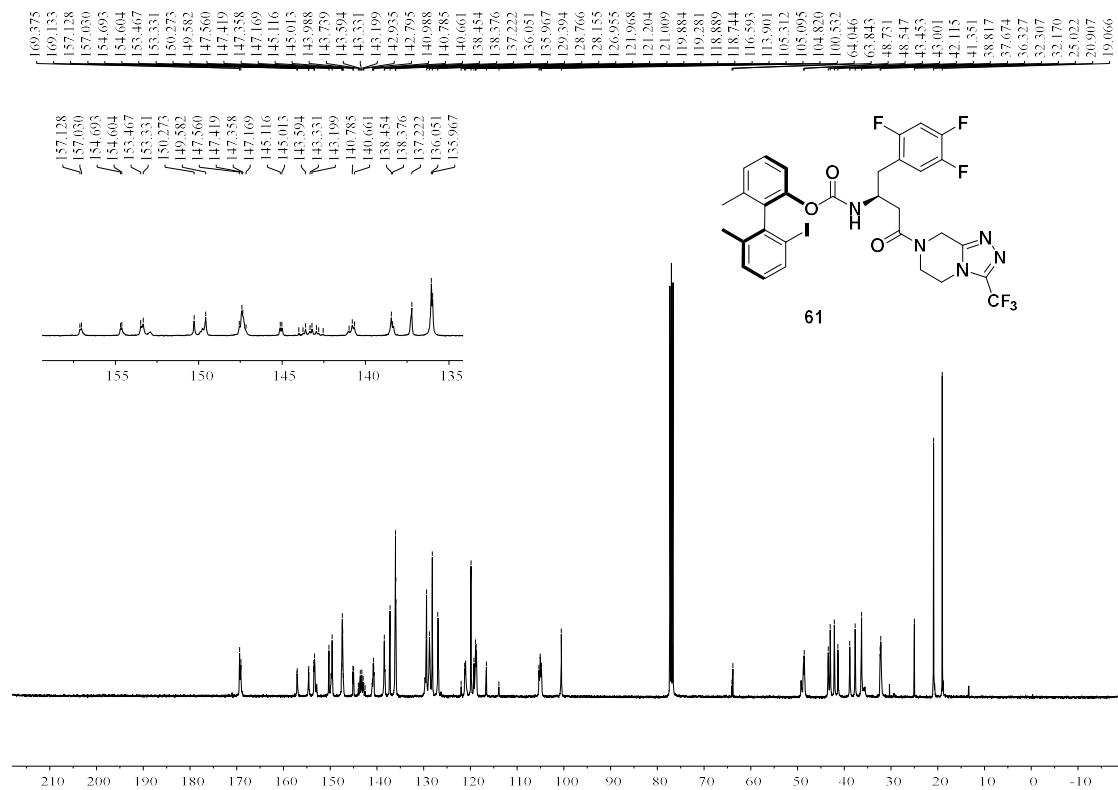

Figure S121. <sup>13</sup>C NMR Spectrum of 61

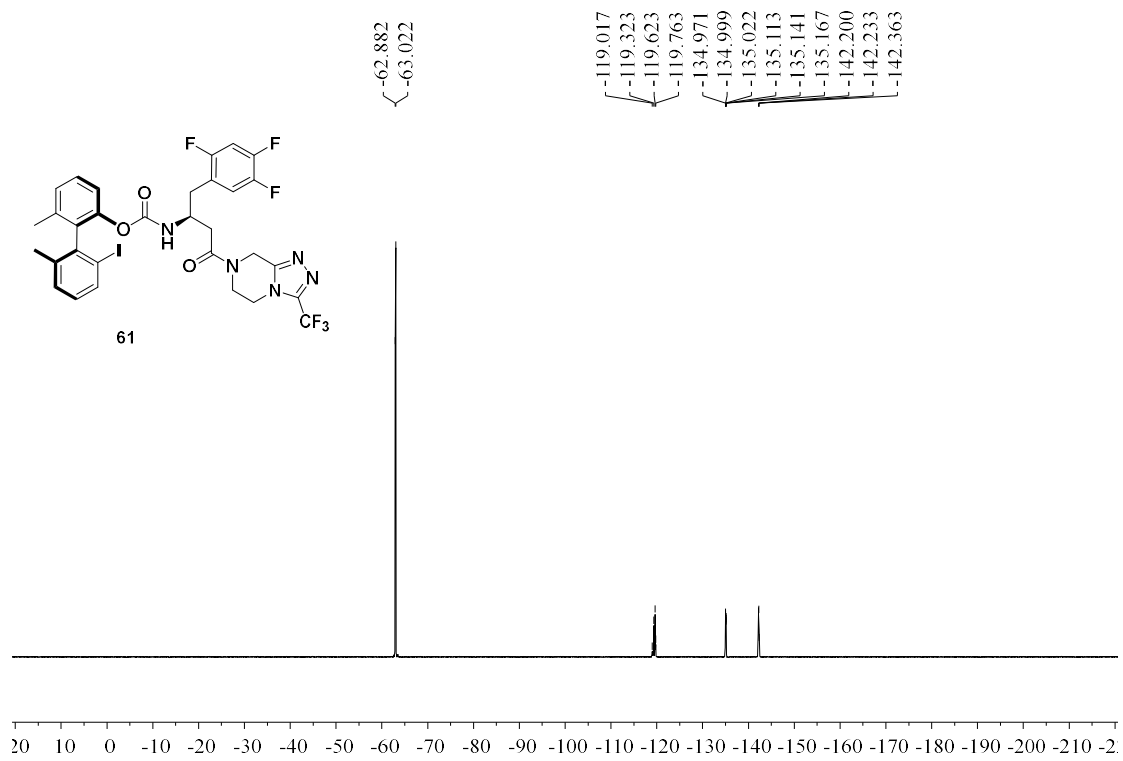

Supplementary Figure 122.  $^{19}\text{F}$  NMR Spectrum of 61



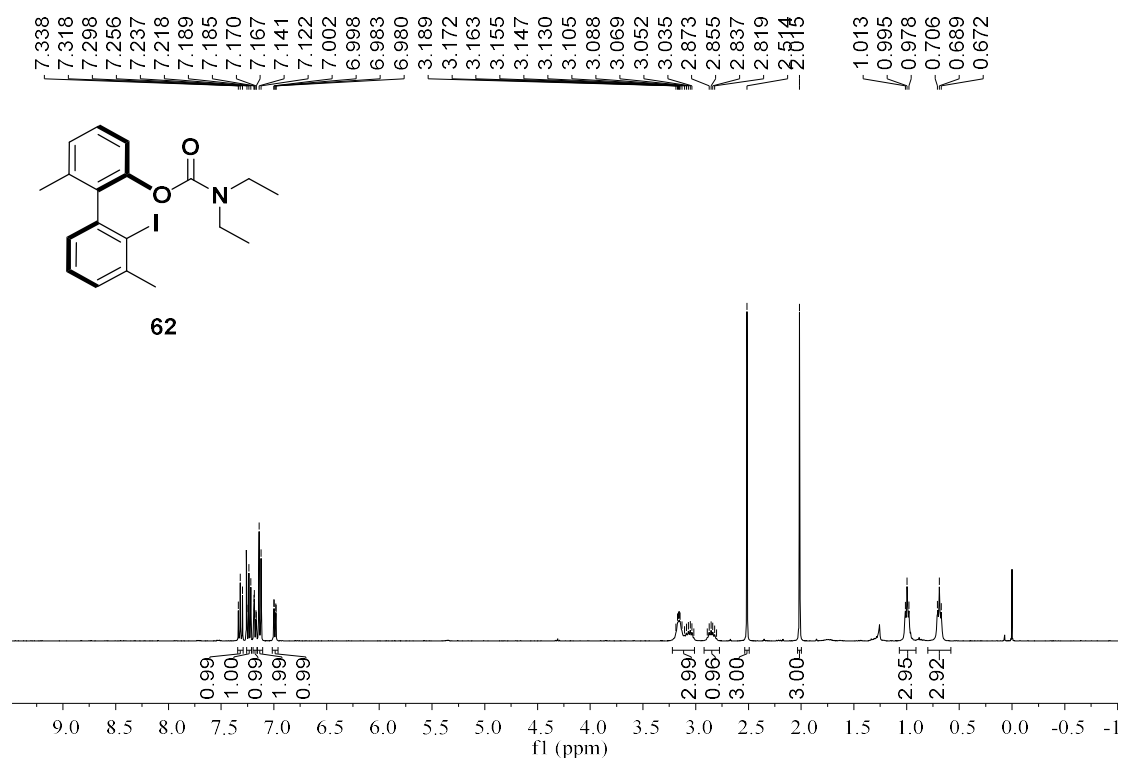

Figure S123.  $^1\text{H}$  NMR Spectrum of **62**

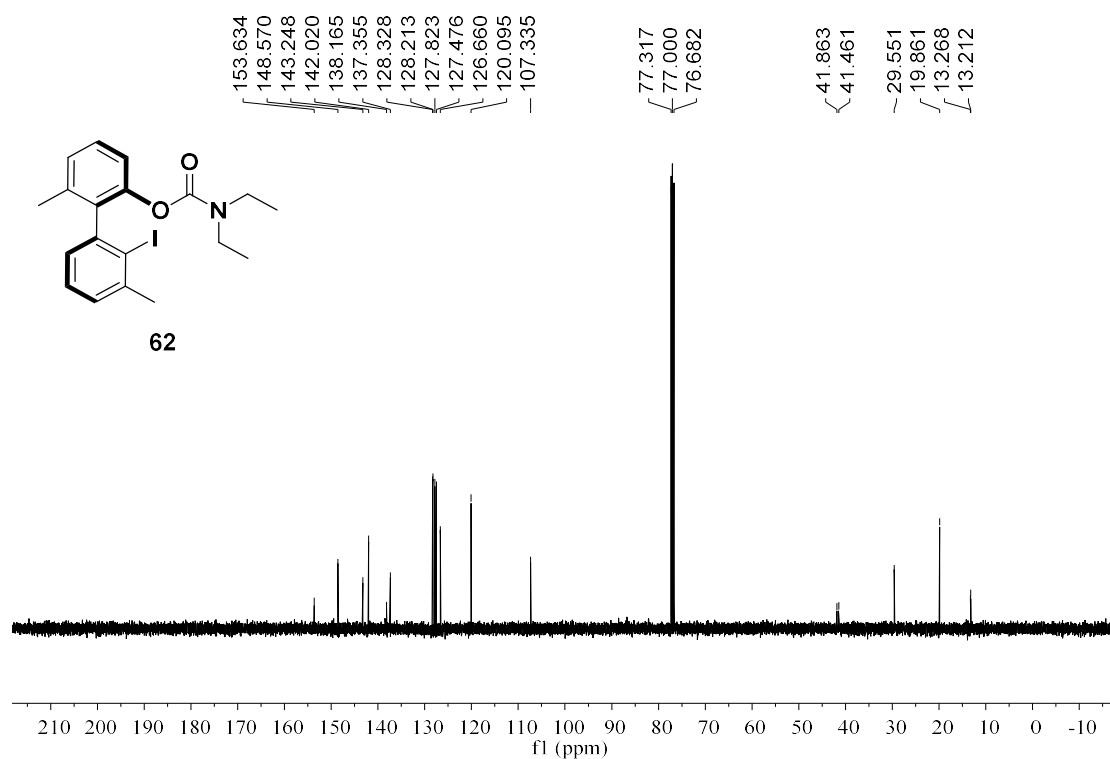

Figure S124.  $^{13}\text{C}$  NMR Spectrum of **62**

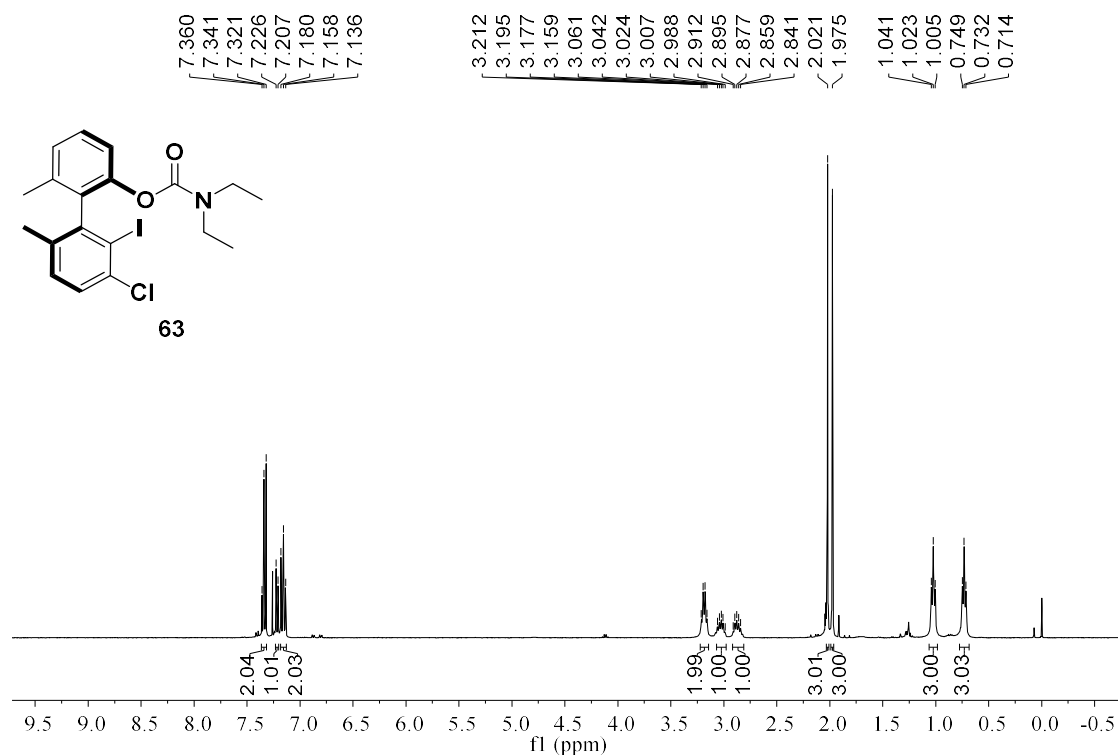

Figure S125. <sup>1</sup>H NMR Spectrum of **63**

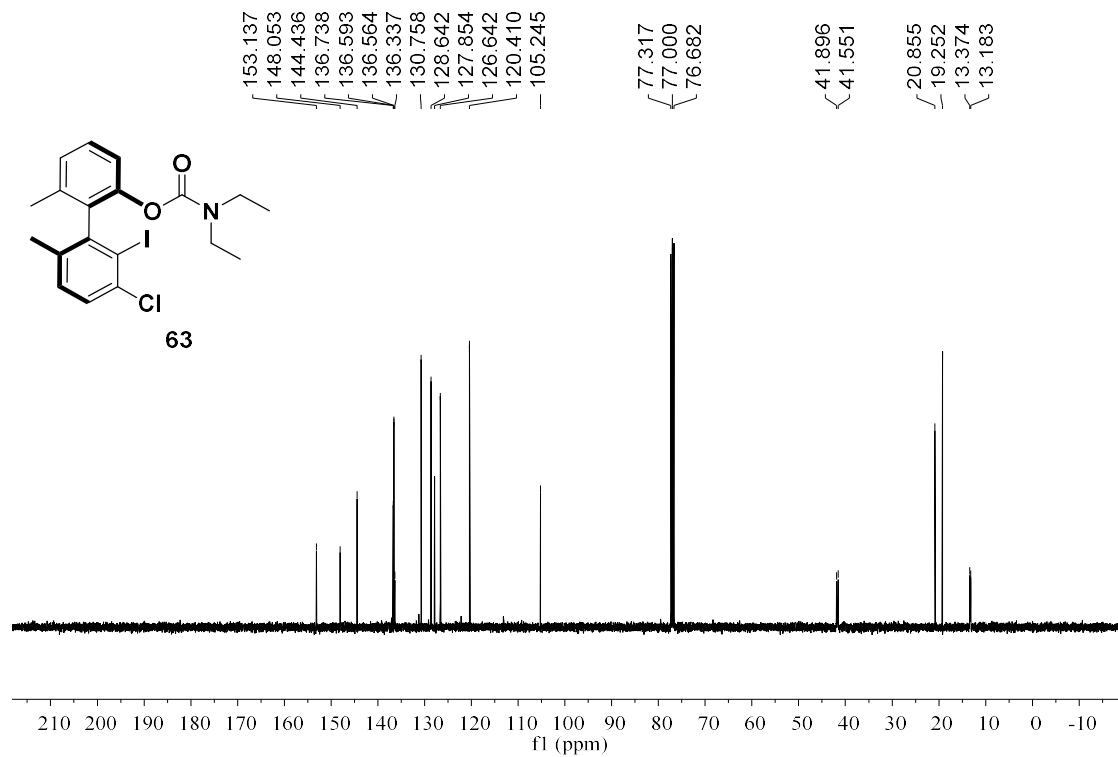

Figure S126. <sup>13</sup>C NMR Spectrum of **63**

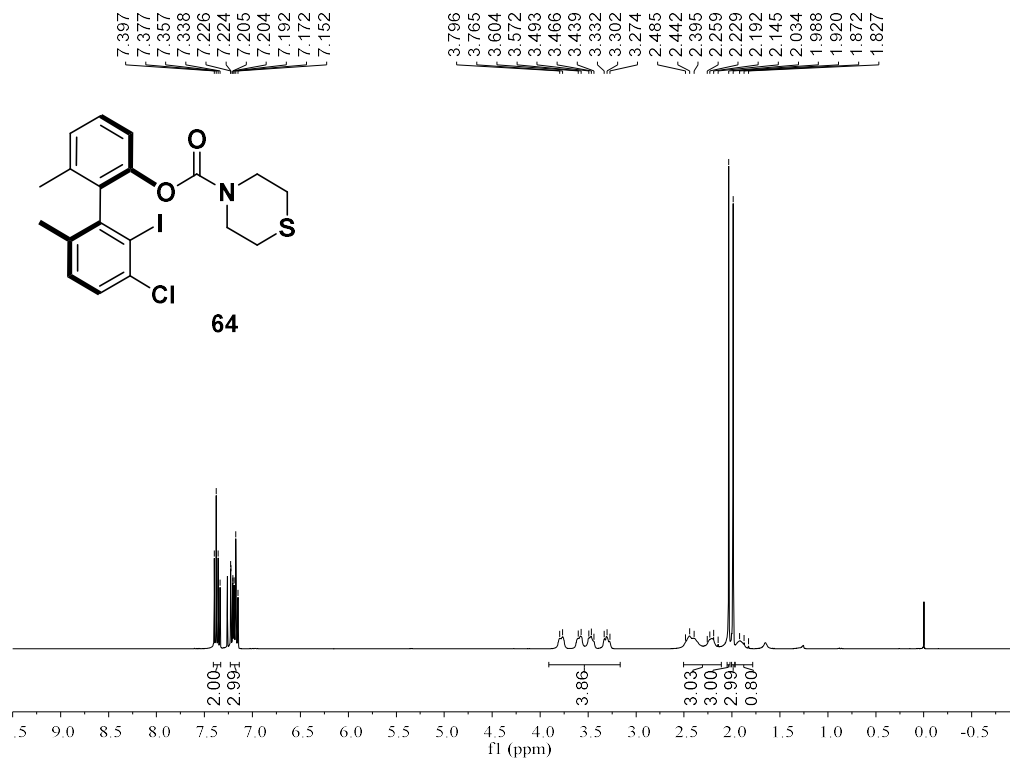

**Figure S127. <sup>1</sup>H NMR Spectrum of 64**

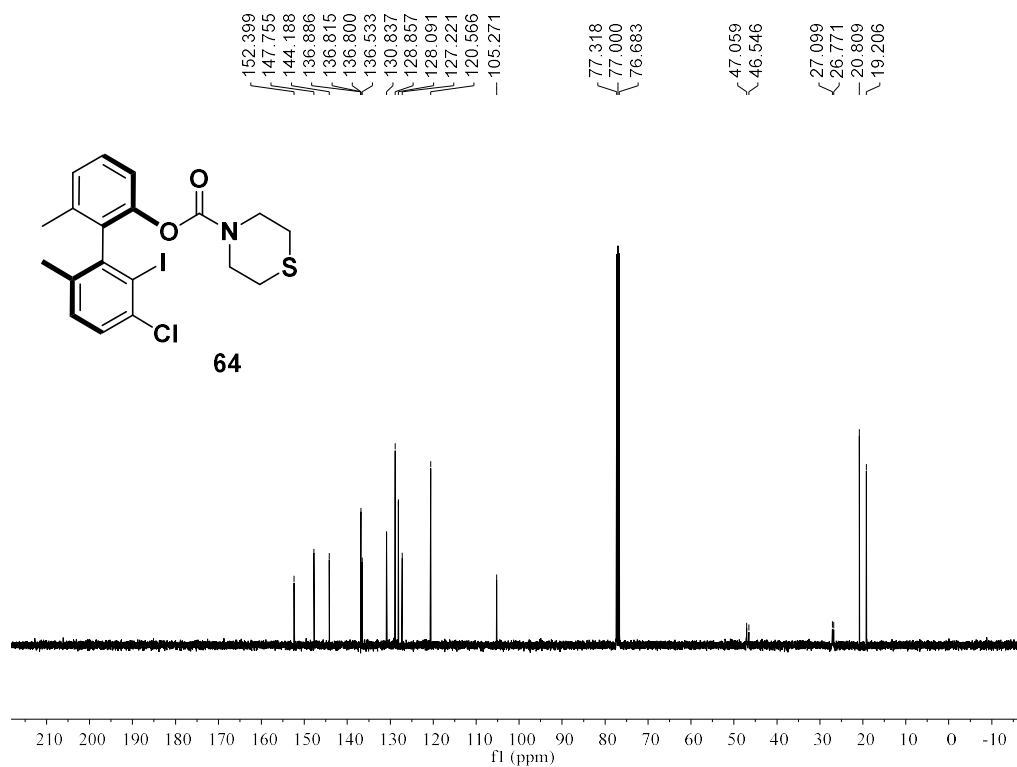

**Figure S128. <sup>13</sup>C NMR Spectrum of 64**

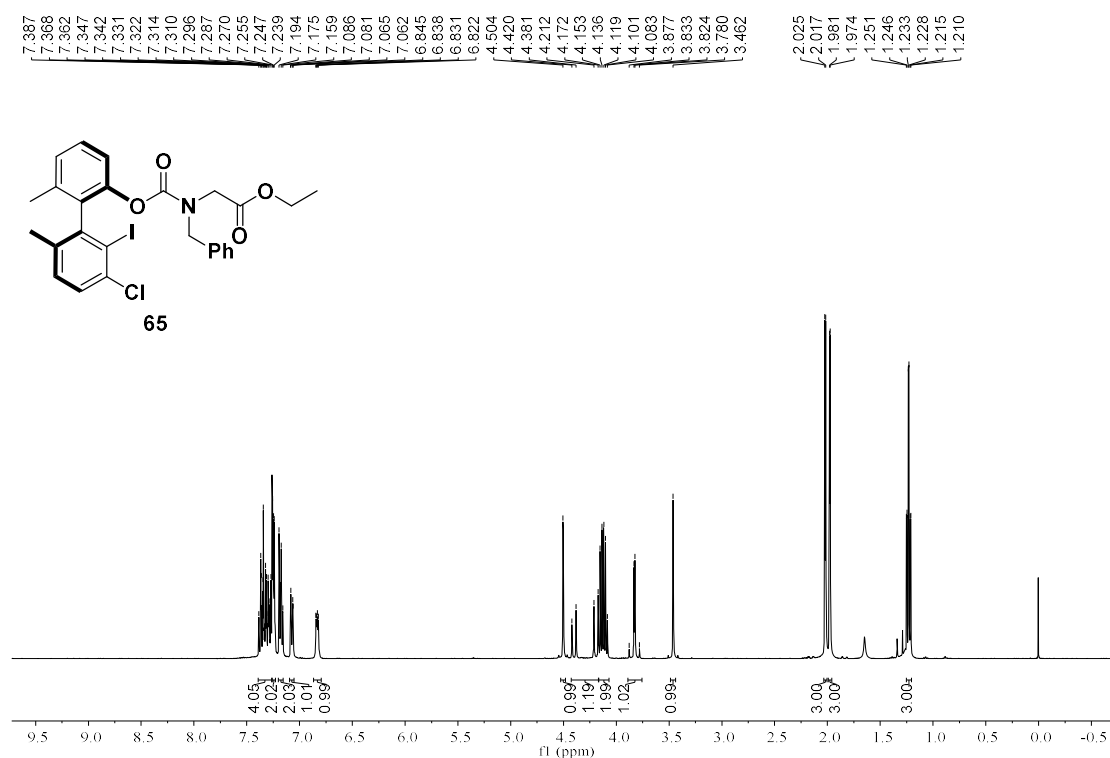

**Figure S129. <sup>1</sup>H NMR Spectrum of 65**

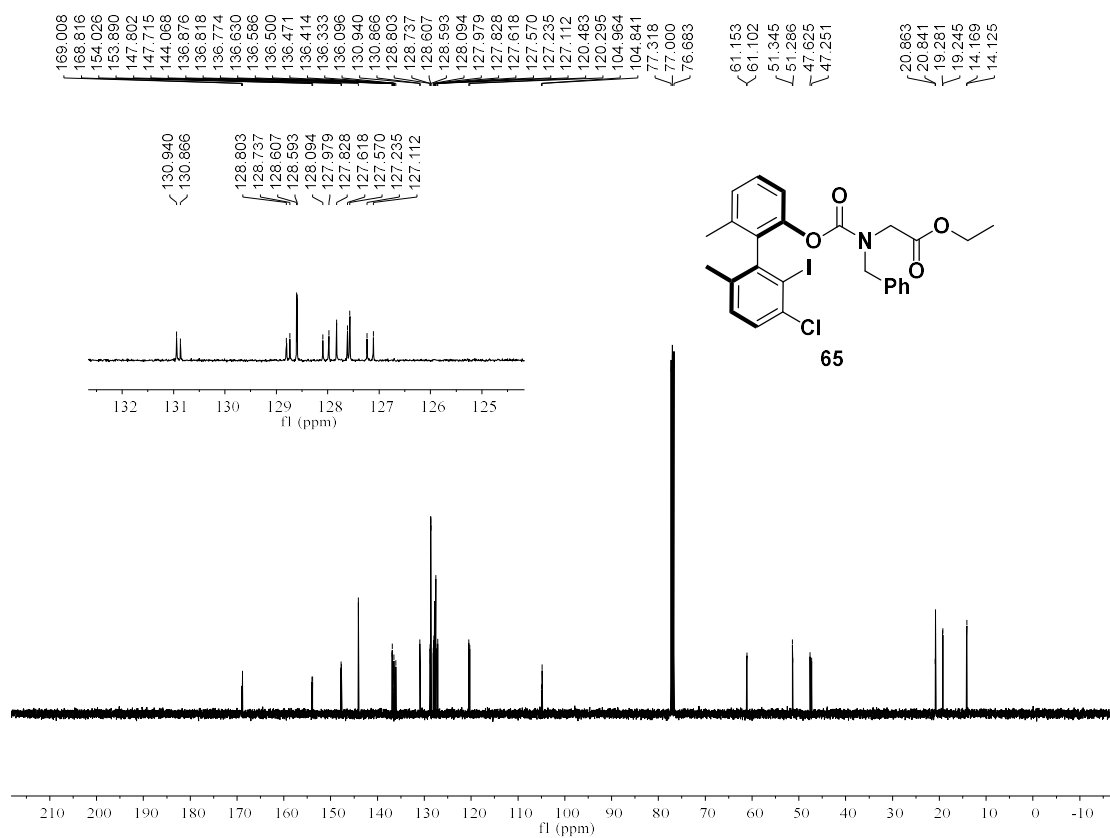

**Figure S130. <sup>13</sup>C NMR Spectrum of 65**

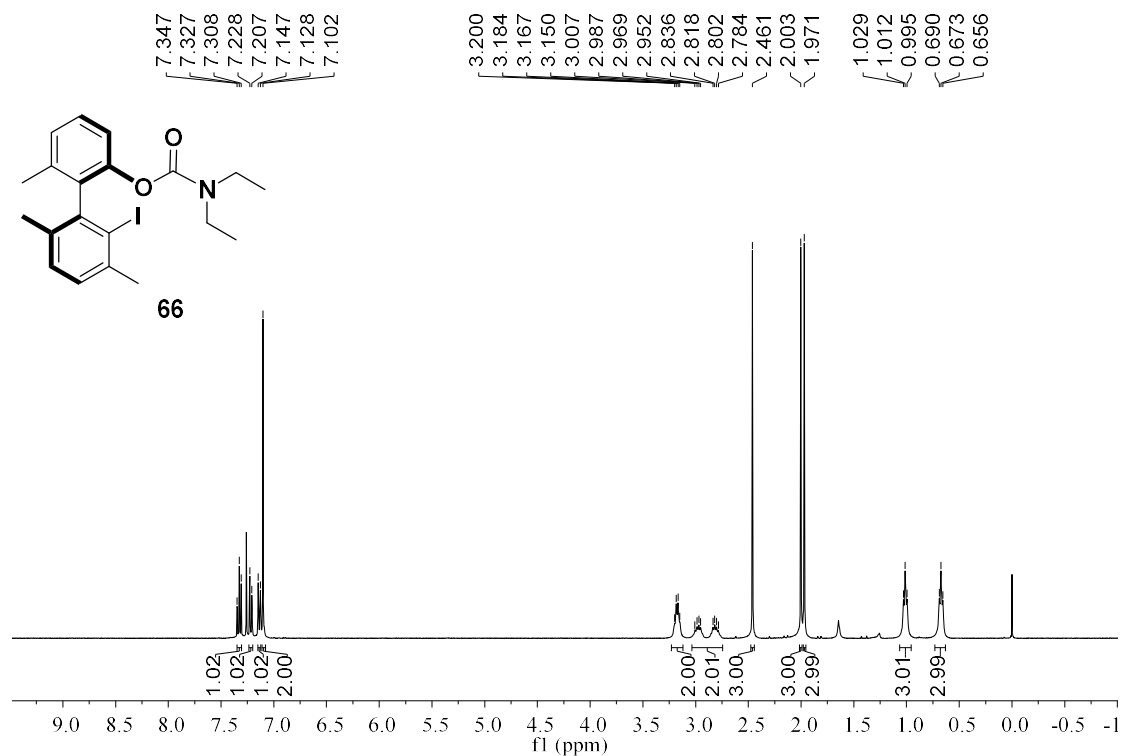

Figure S131. <sup>1</sup>H NMR Spectrum of **66**

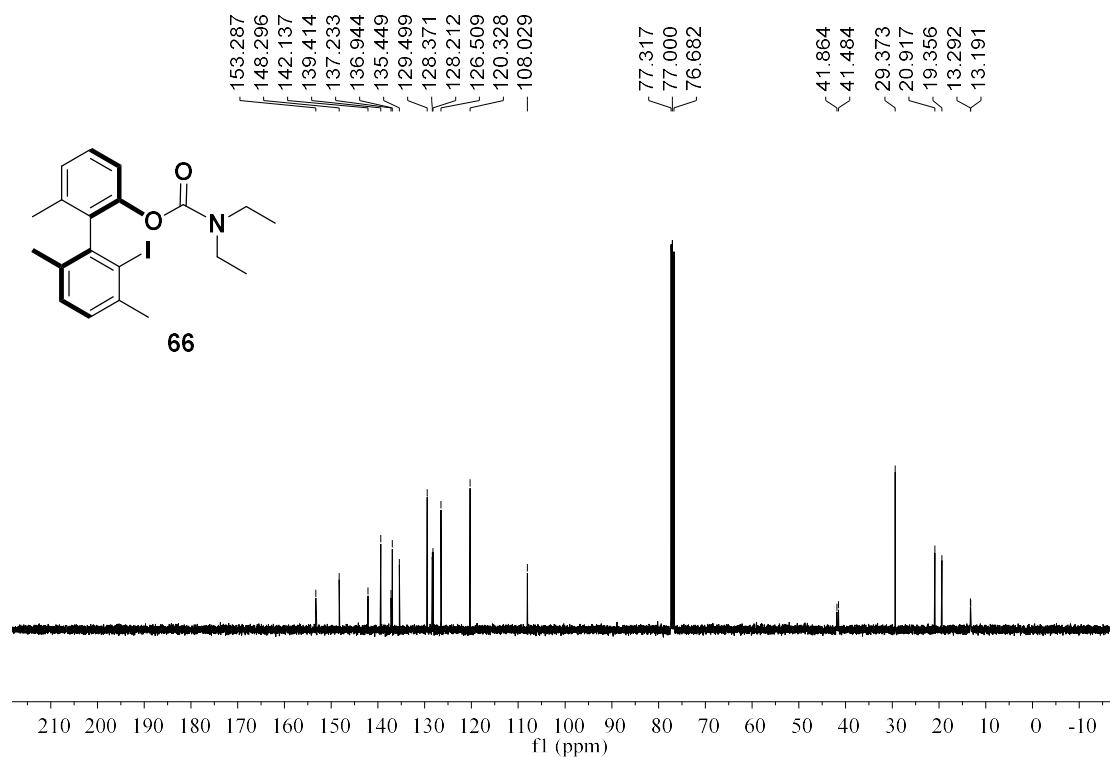

Figure S132. <sup>13</sup>C NMR Spectrum of **66**

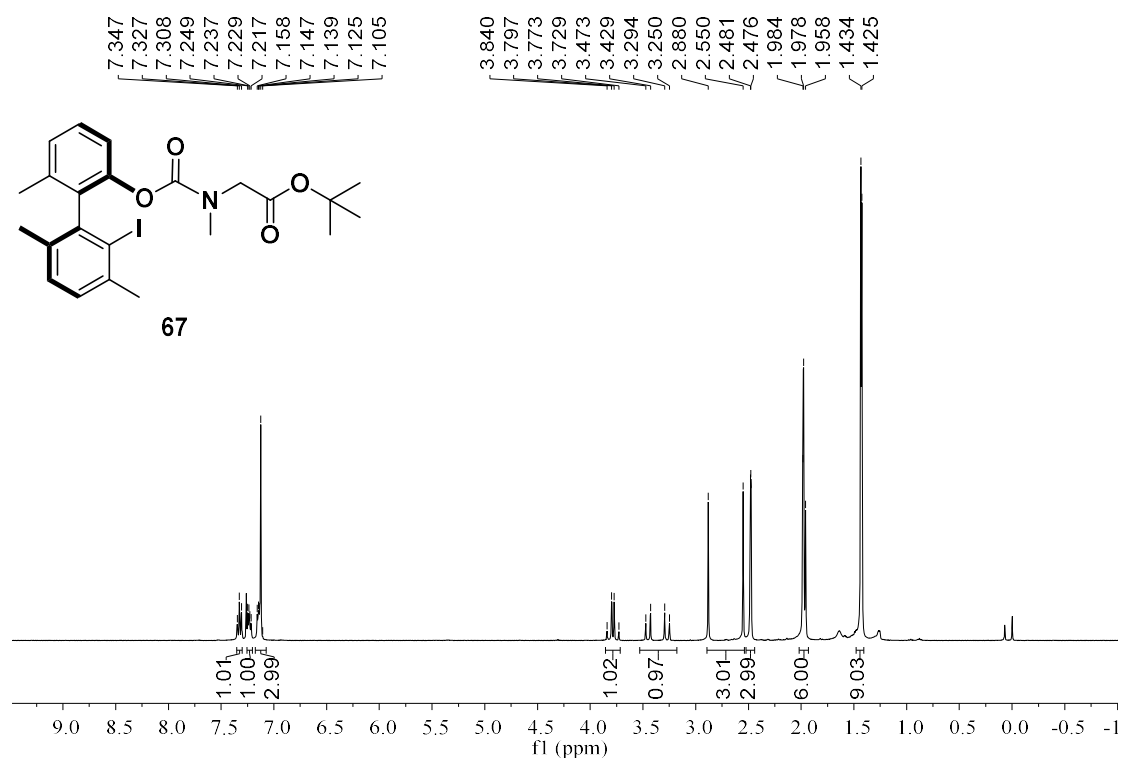

Figure S133. <sup>1</sup>H NMR Spectrum of **67**

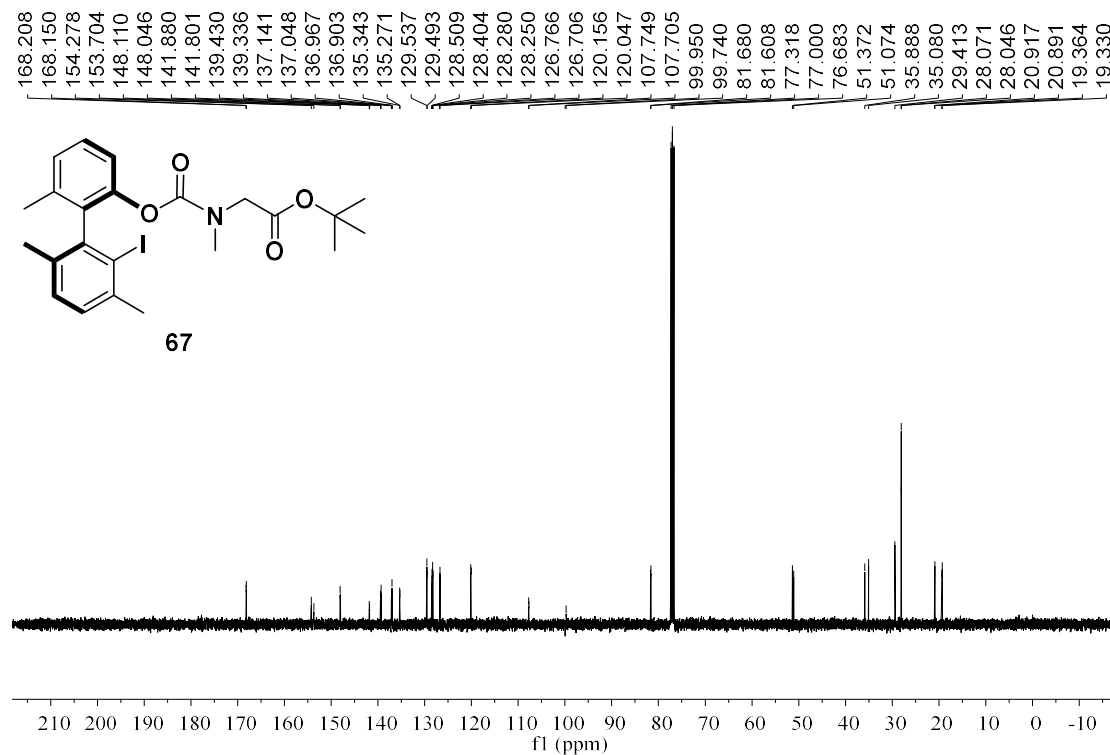

Figure S134. <sup>13</sup>C NMR Spectrum of **67**

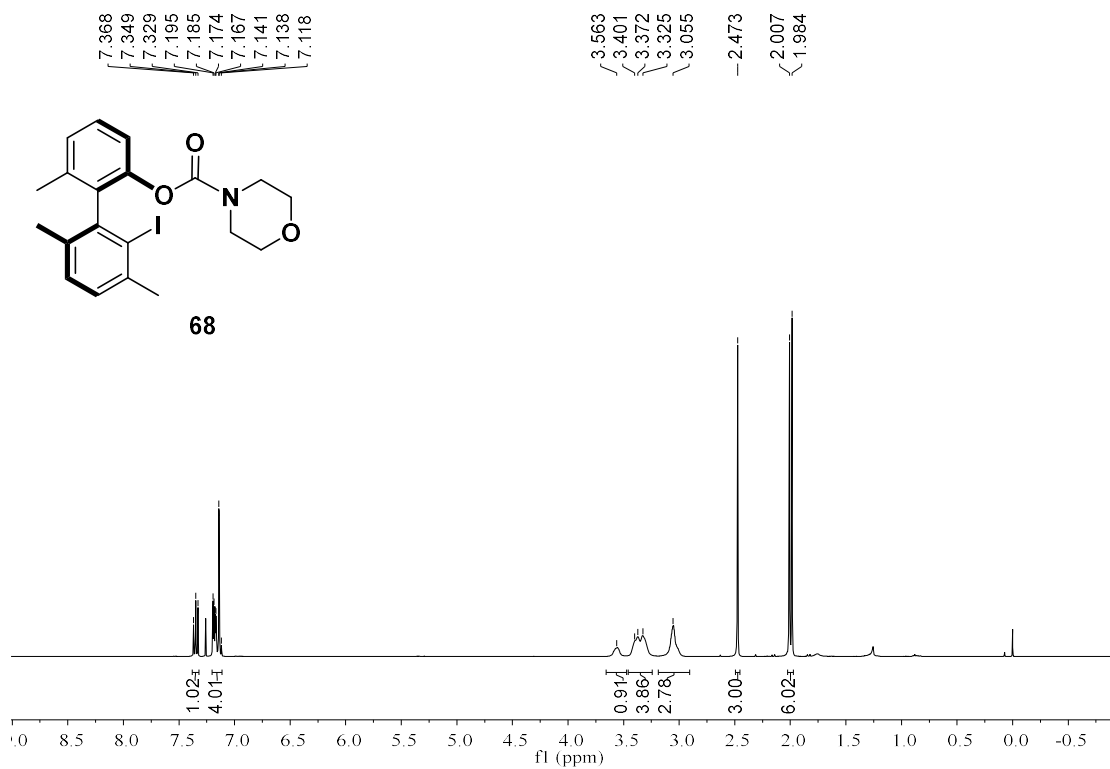

Figure S135.  $^1\text{H}$  NMR Spectrum of **68**

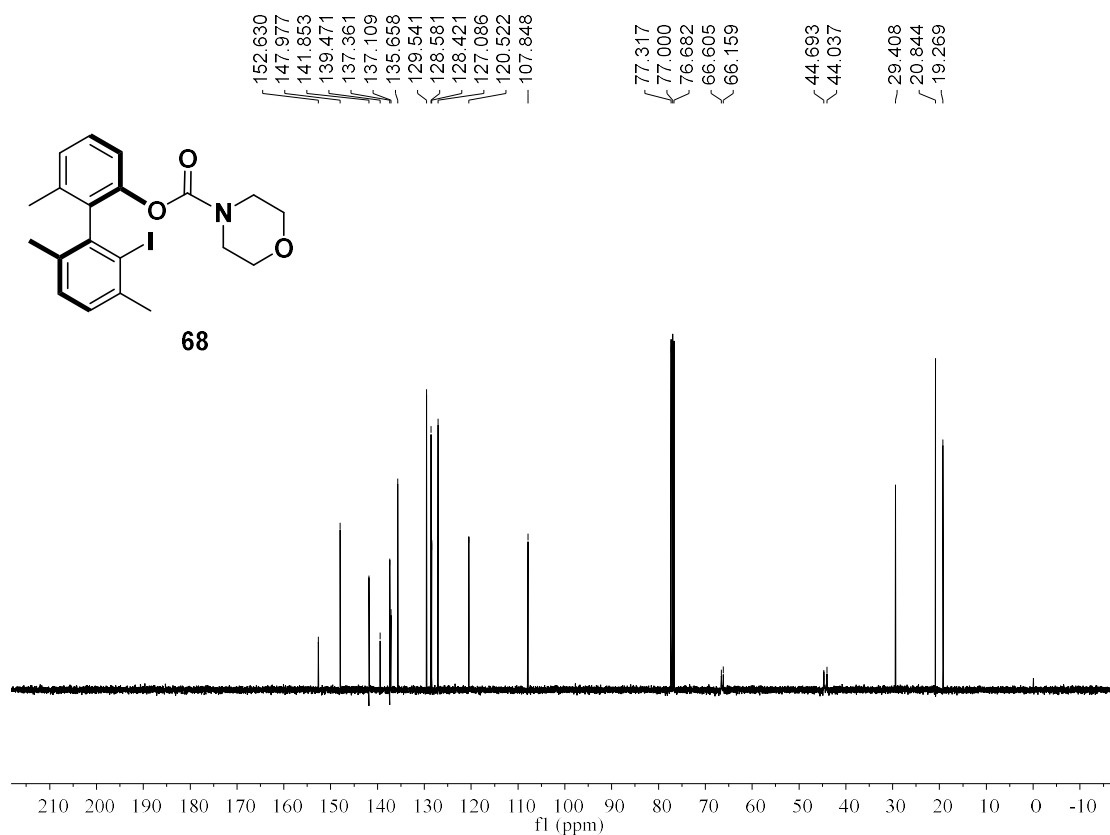

Figure S136.  $^{13}\text{C}$  NMR Spectrum of **68**

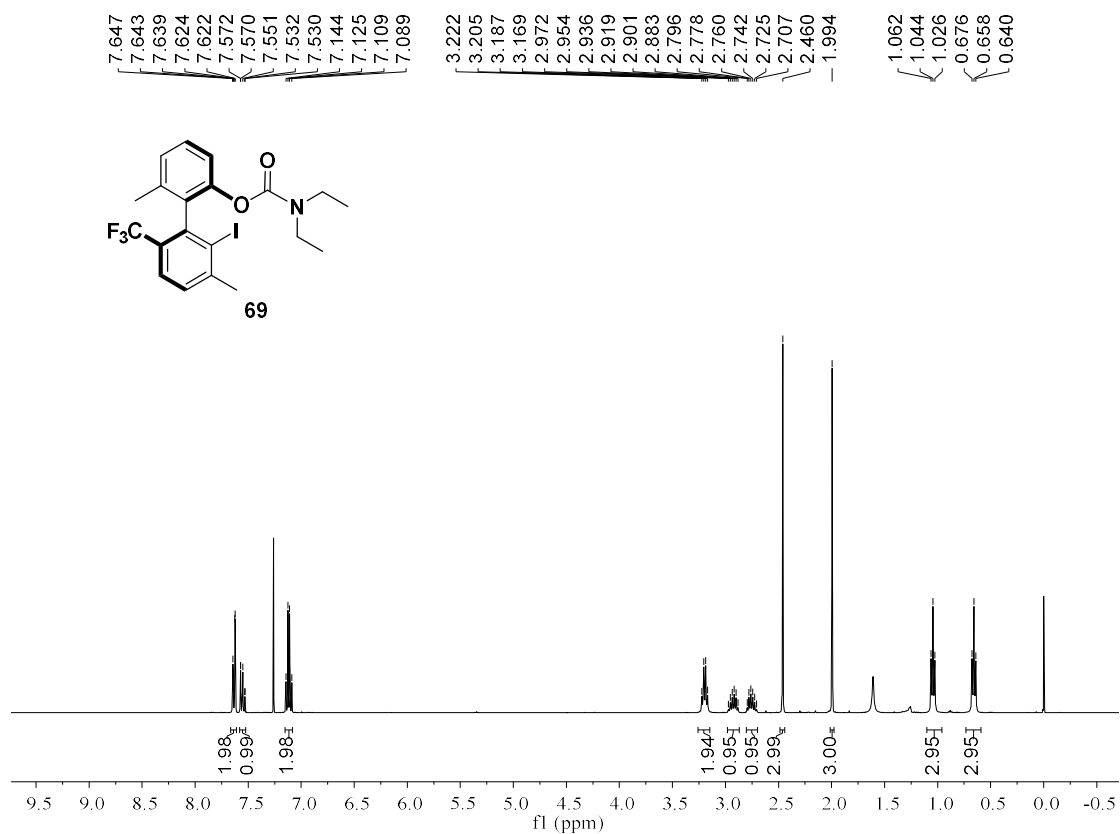

Figure S137. <sup>1</sup>H NMR Spectrum of **69**

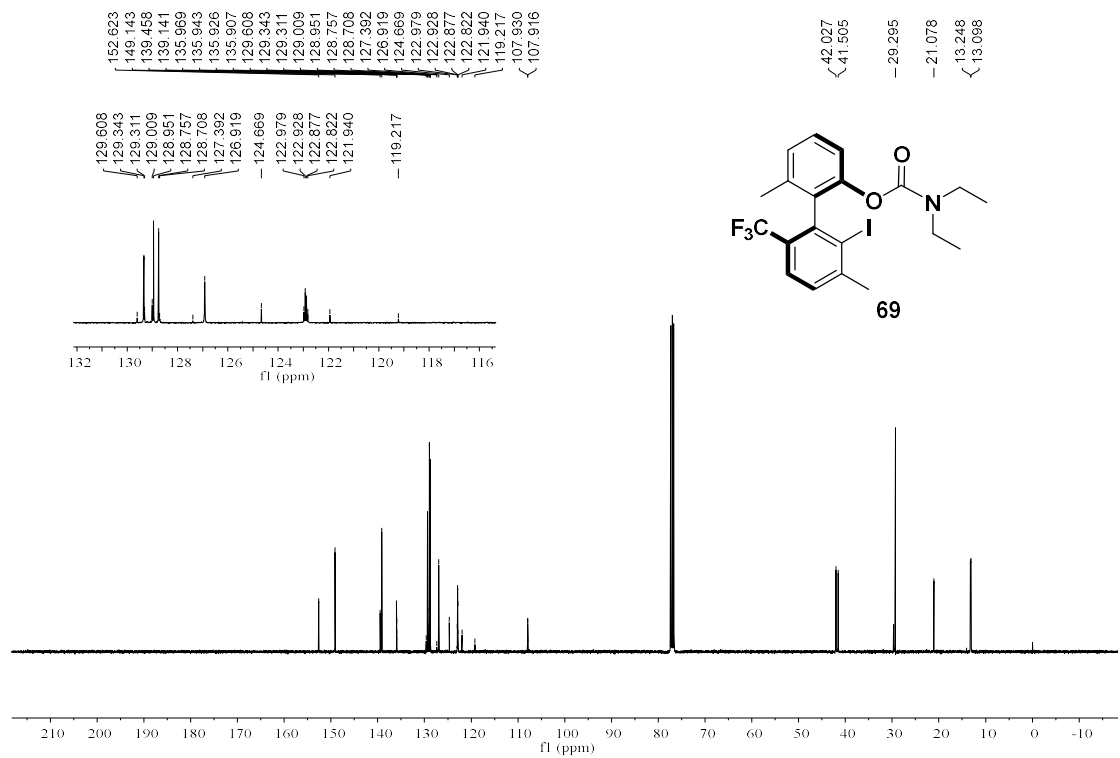

Figure S138. <sup>13</sup>C NMR Spectrum of **69**



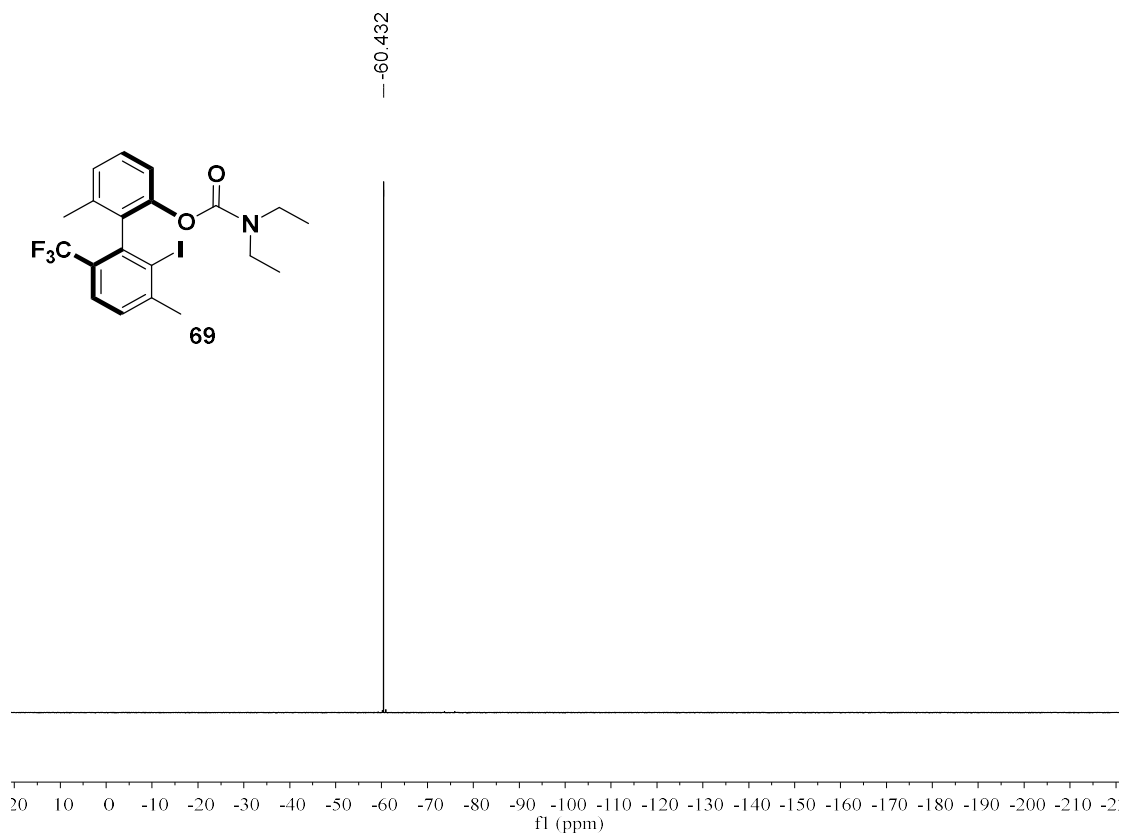

**Figure S139.**  $^{19}\text{F}$  NMR Spectrum of **69**



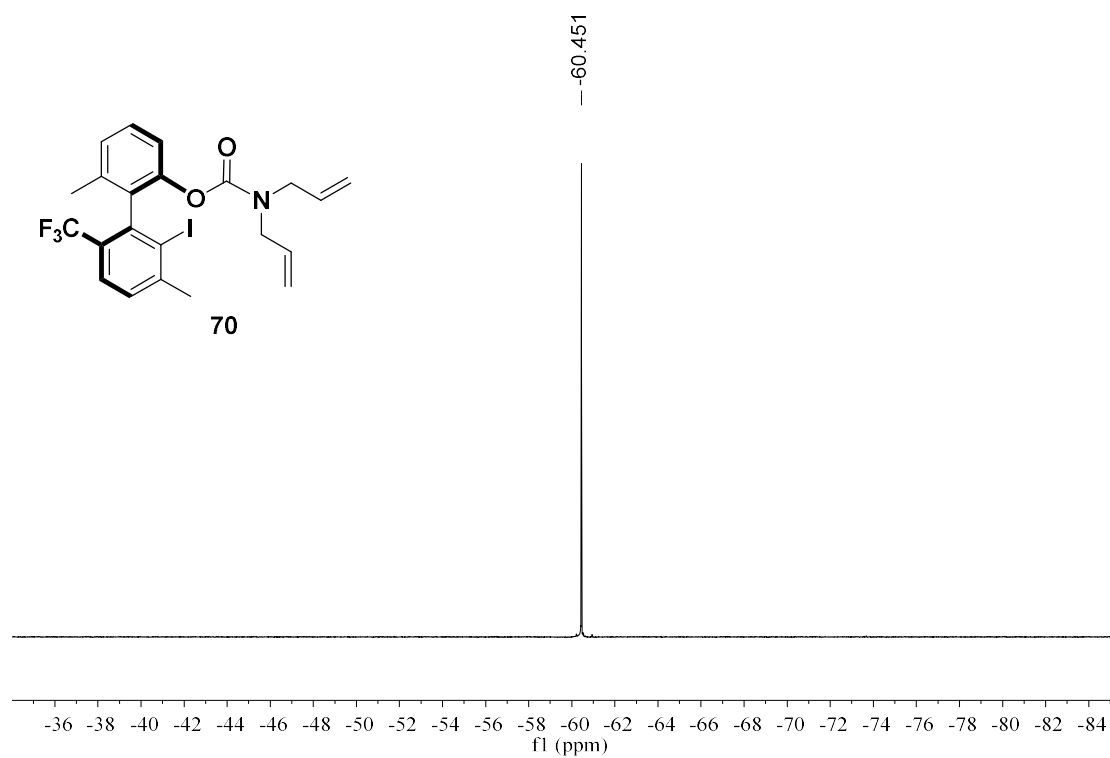

**Figure S142.**  $^{19}\text{F}$  NMR Spectrum of **70**

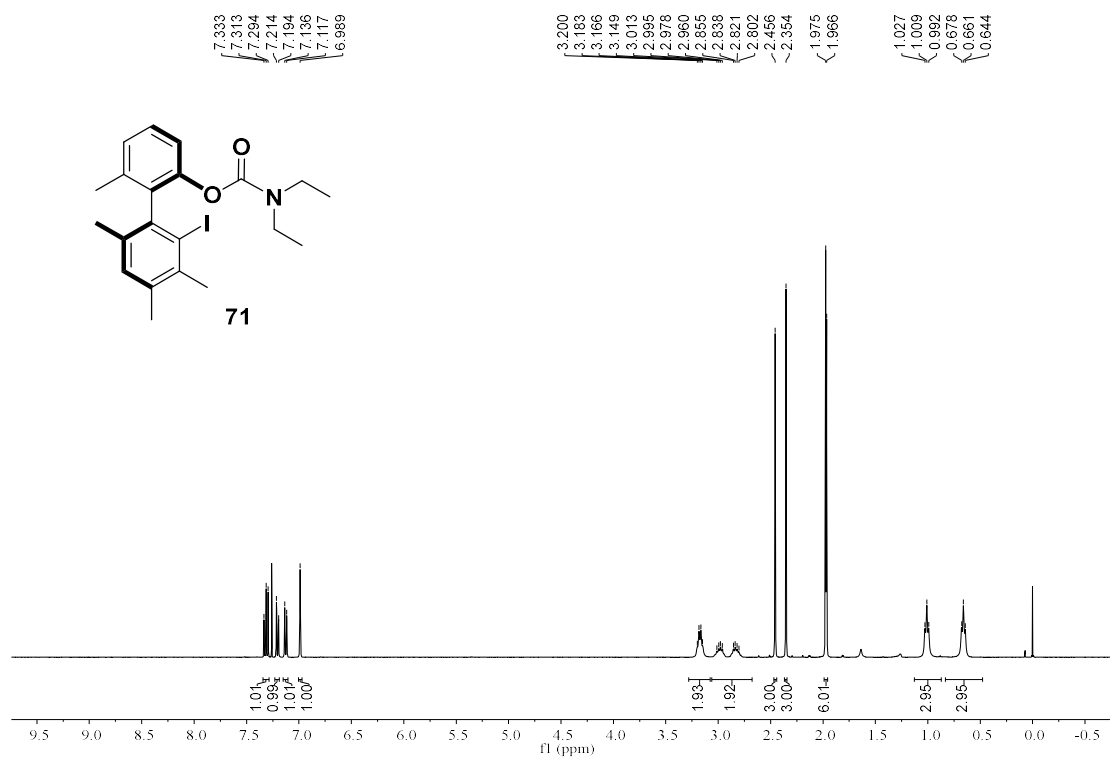

**Figure S143. <sup>1</sup>H NMR Spectrum of 71**

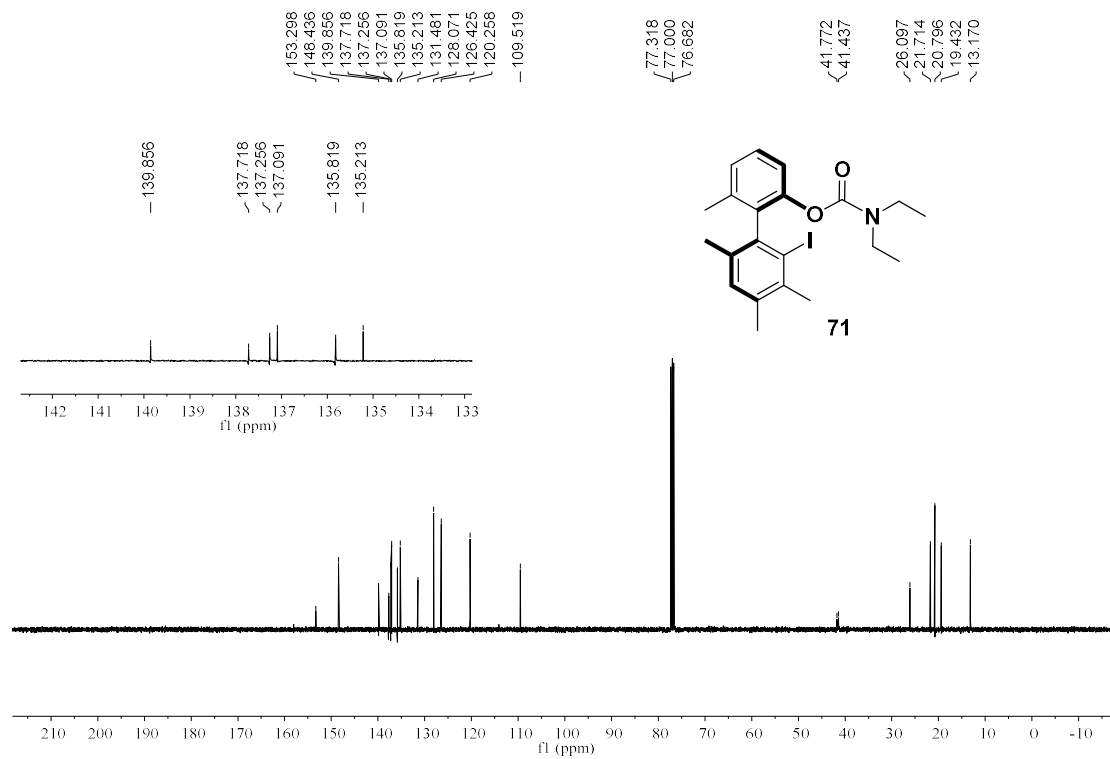

**Figure S144. <sup>13</sup>C NMR Spectrum of 71**

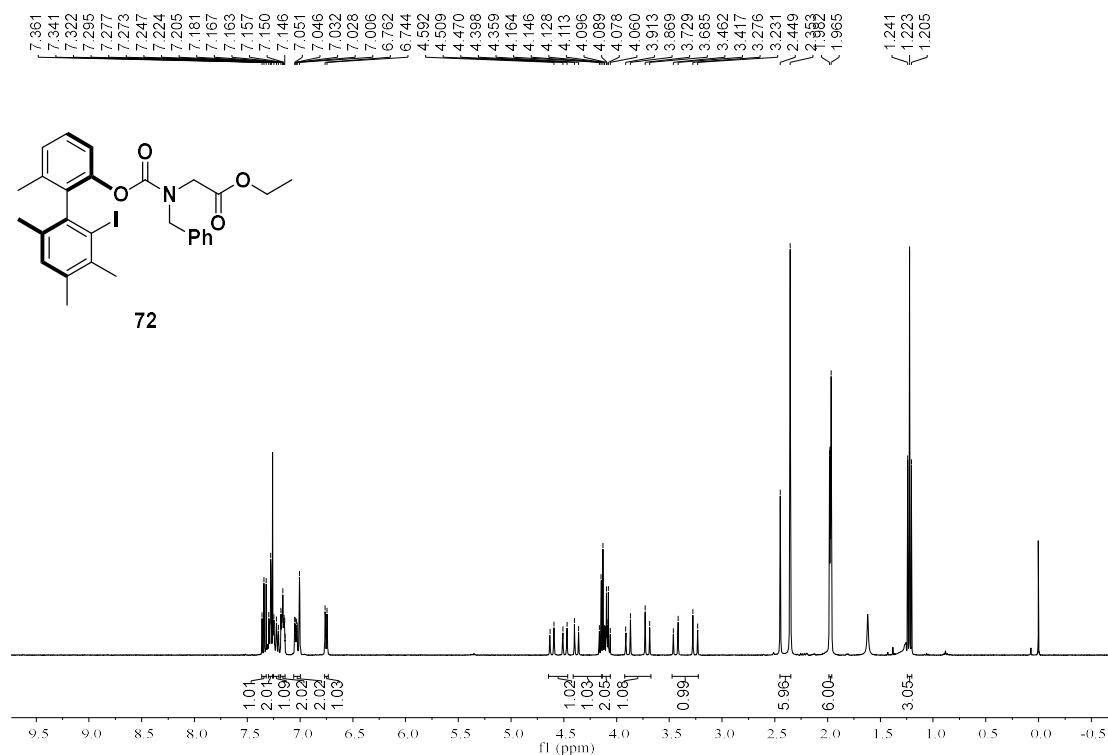

Figure S145. <sup>1</sup>H NMR Spectrum of **72**

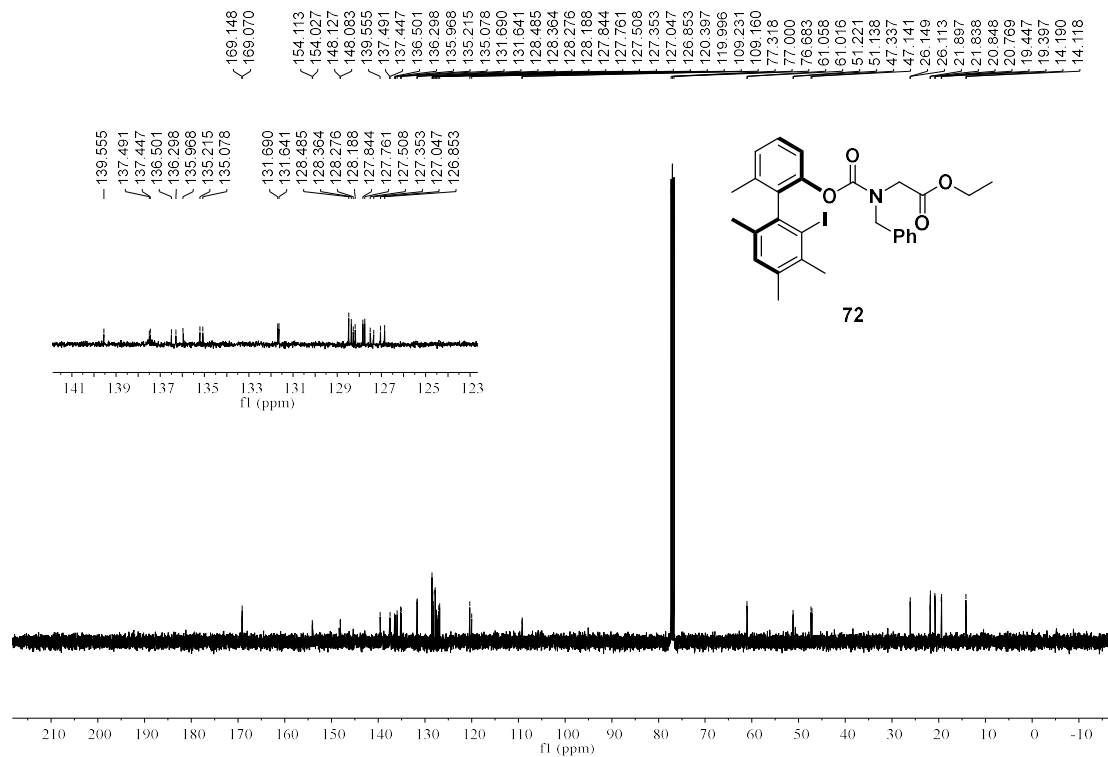

Figure 146. <sup>13</sup>C NMR Spectrum of **72**

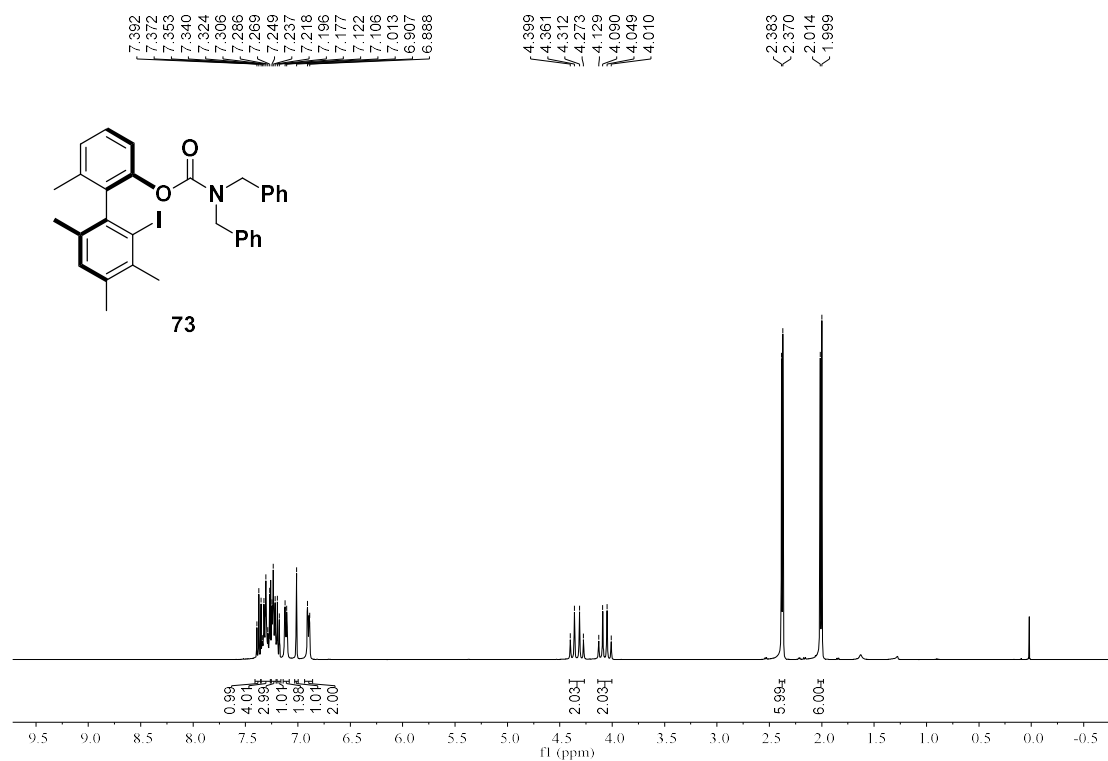

Figure S147. <sup>1</sup>H NMR Spectrum of 73

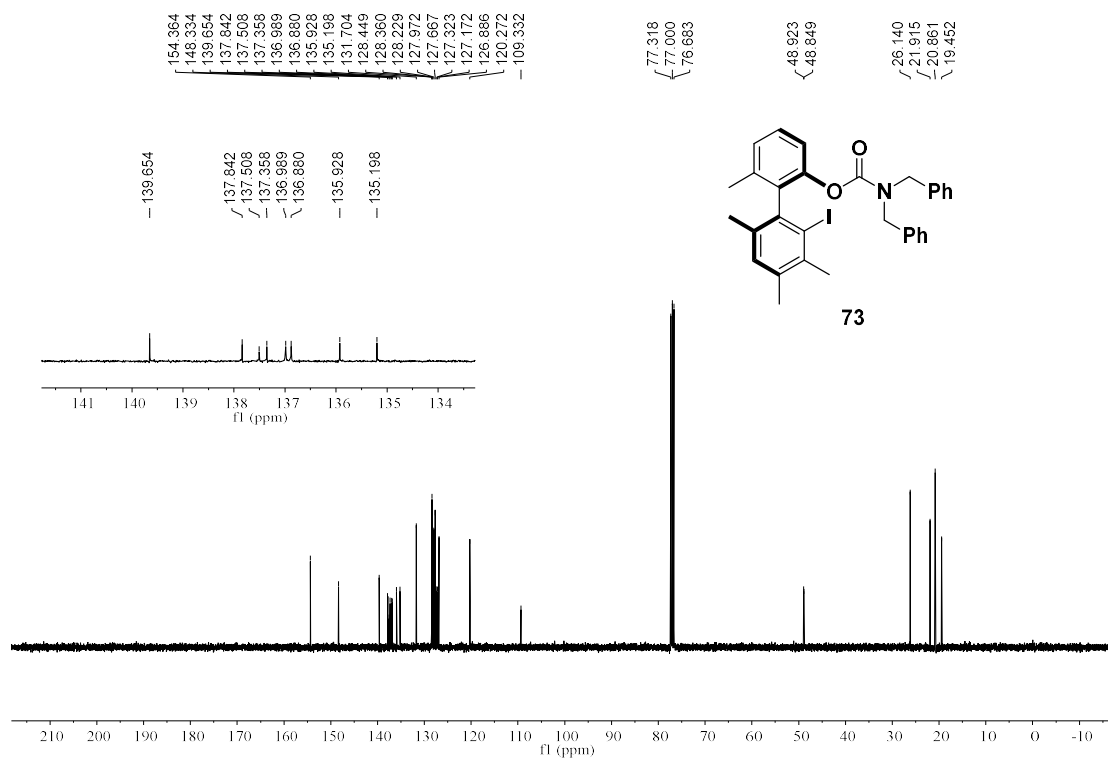

Figure S148. <sup>13</sup>C NMR Spectrum of 73

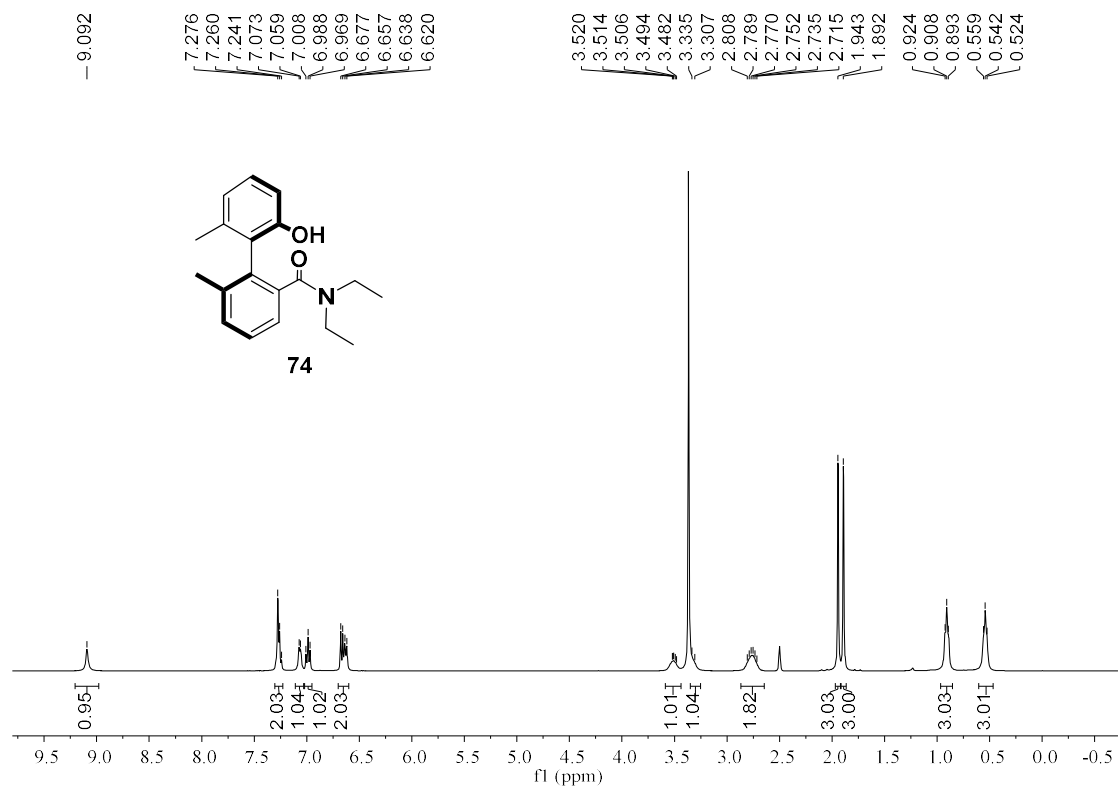

Figure S149. <sup>1</sup>H NMR Spectrum of **74**

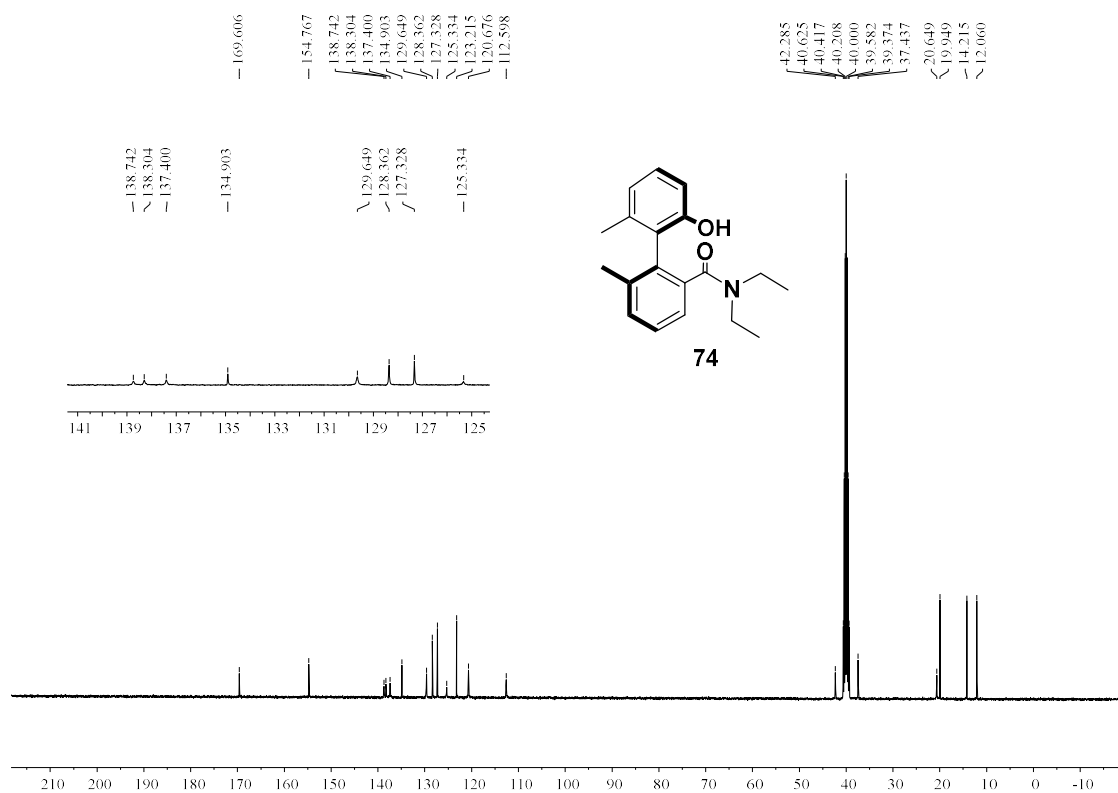

Figure S150. <sup>13</sup>C NMR Spectrum of **74**

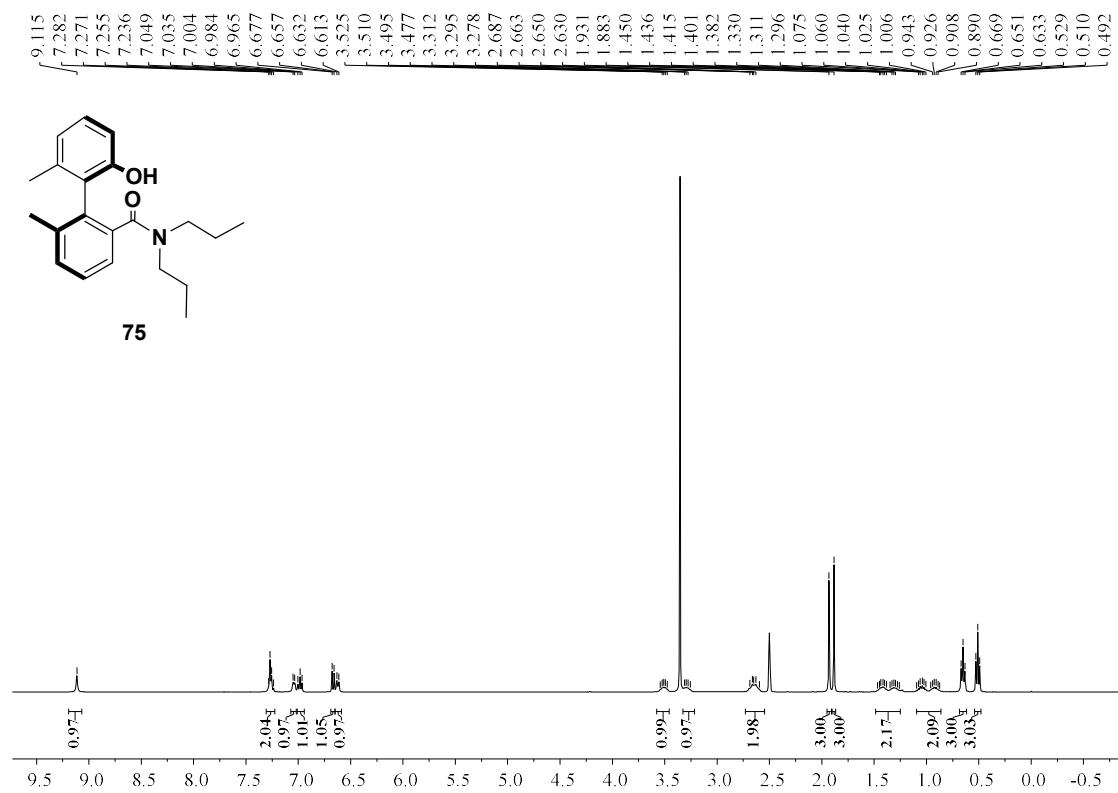

**Figure S151. <sup>1</sup>H NMR Spectrum of 75**

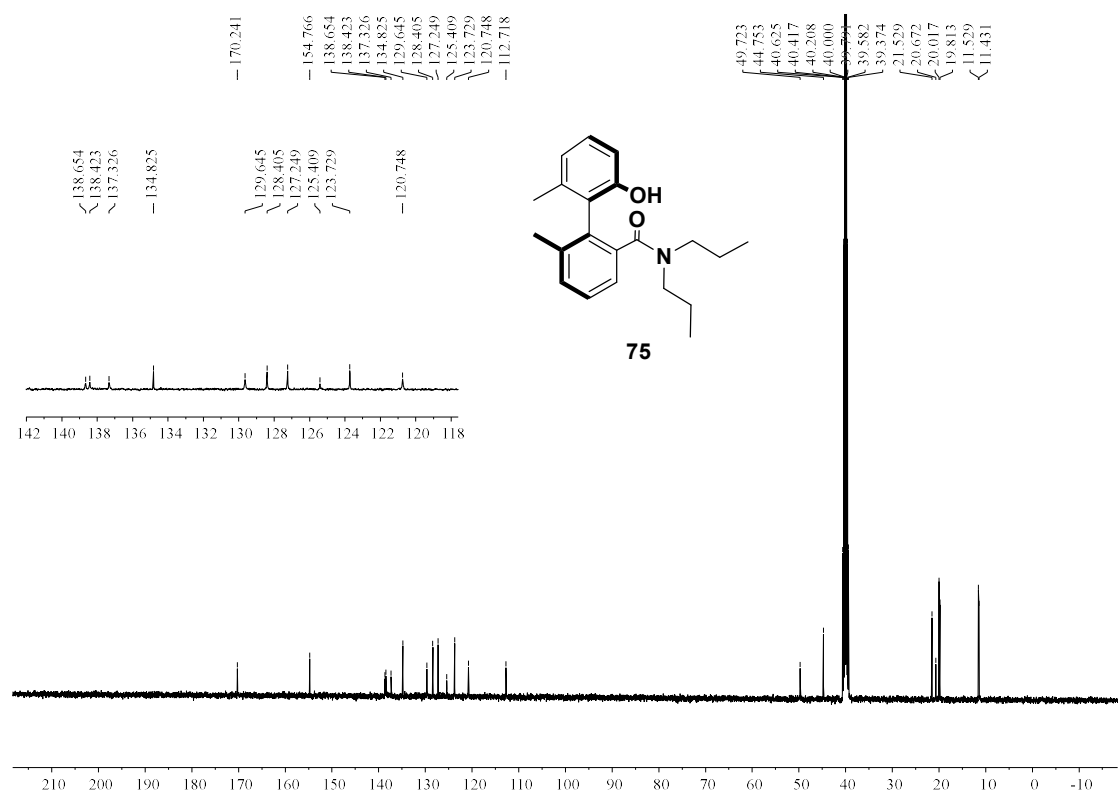

**Figure S152. <sup>13</sup>C NMR Spectrum of 75**



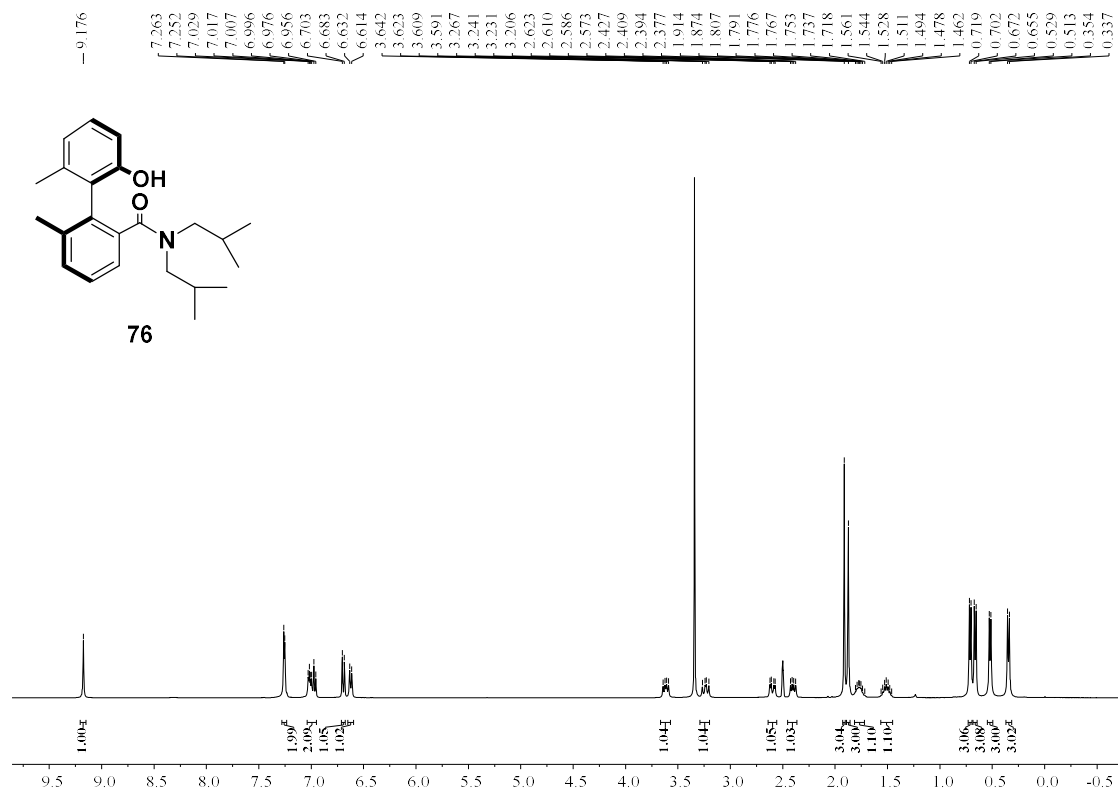

Figure S153. <sup>1</sup>H NMR Spectrum of 76

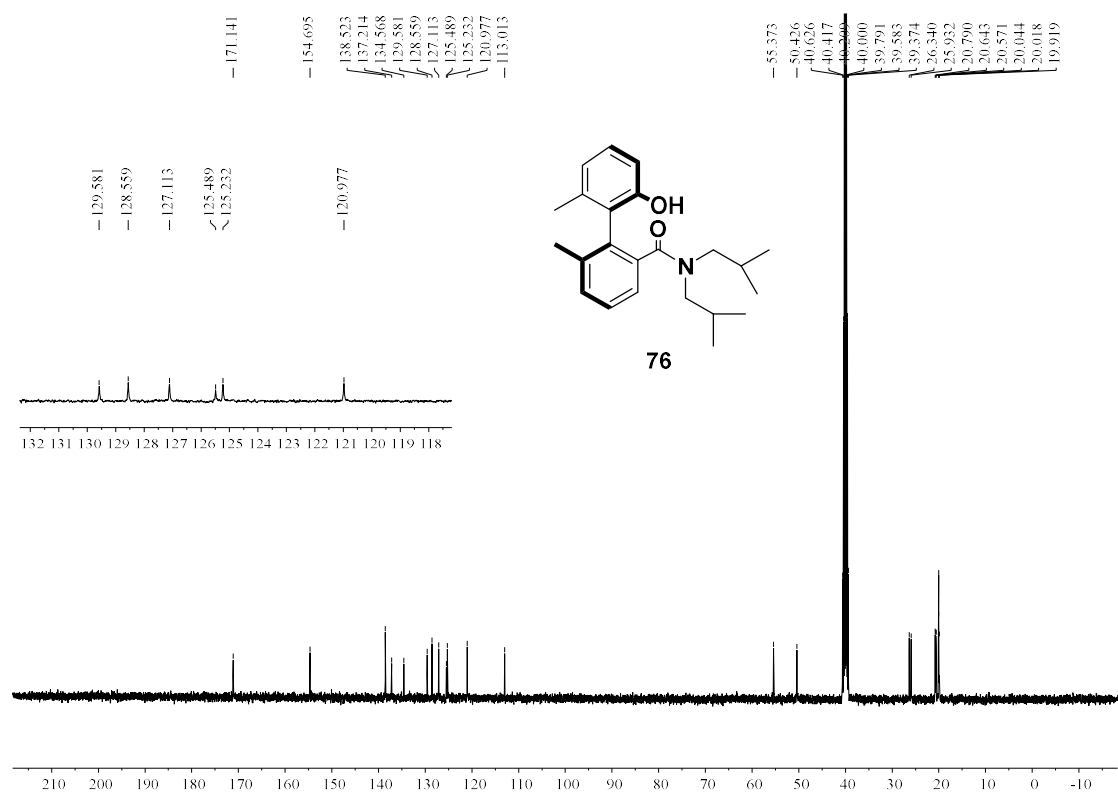

Figure S154. <sup>13</sup>C NMR Spectrum of 76

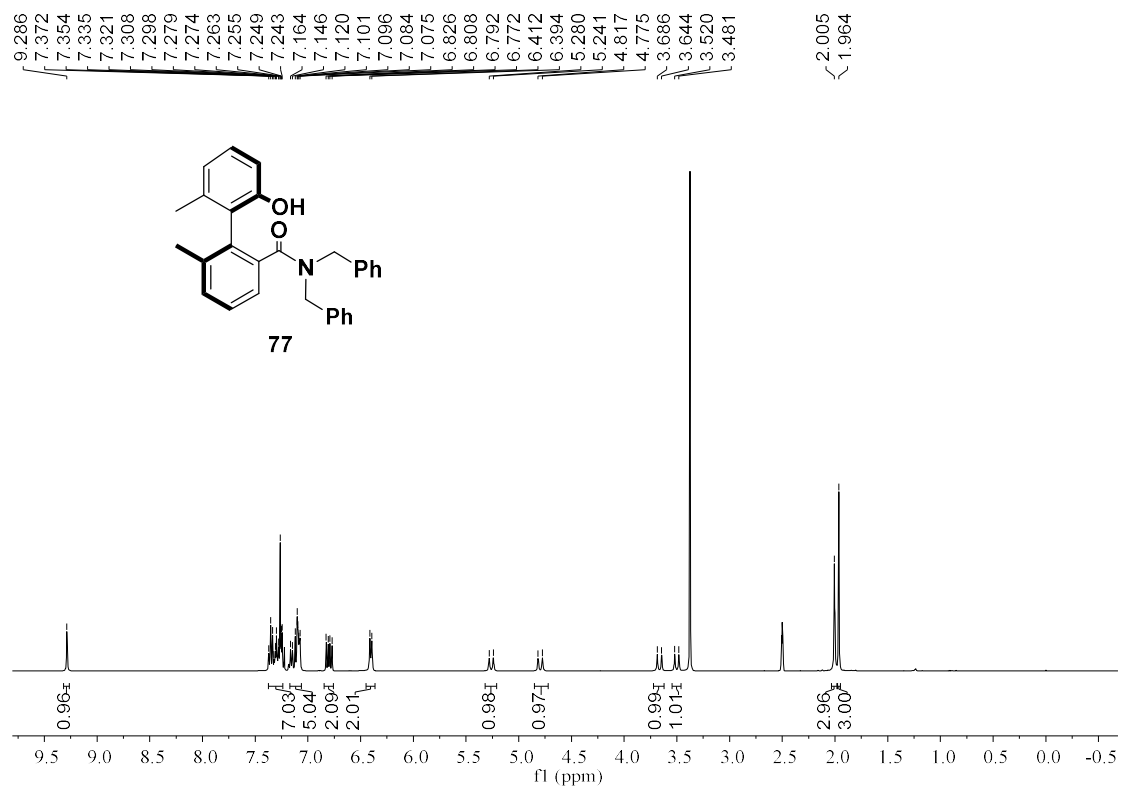

**Figure S155. <sup>1</sup>H NMR Spectrum of 77**

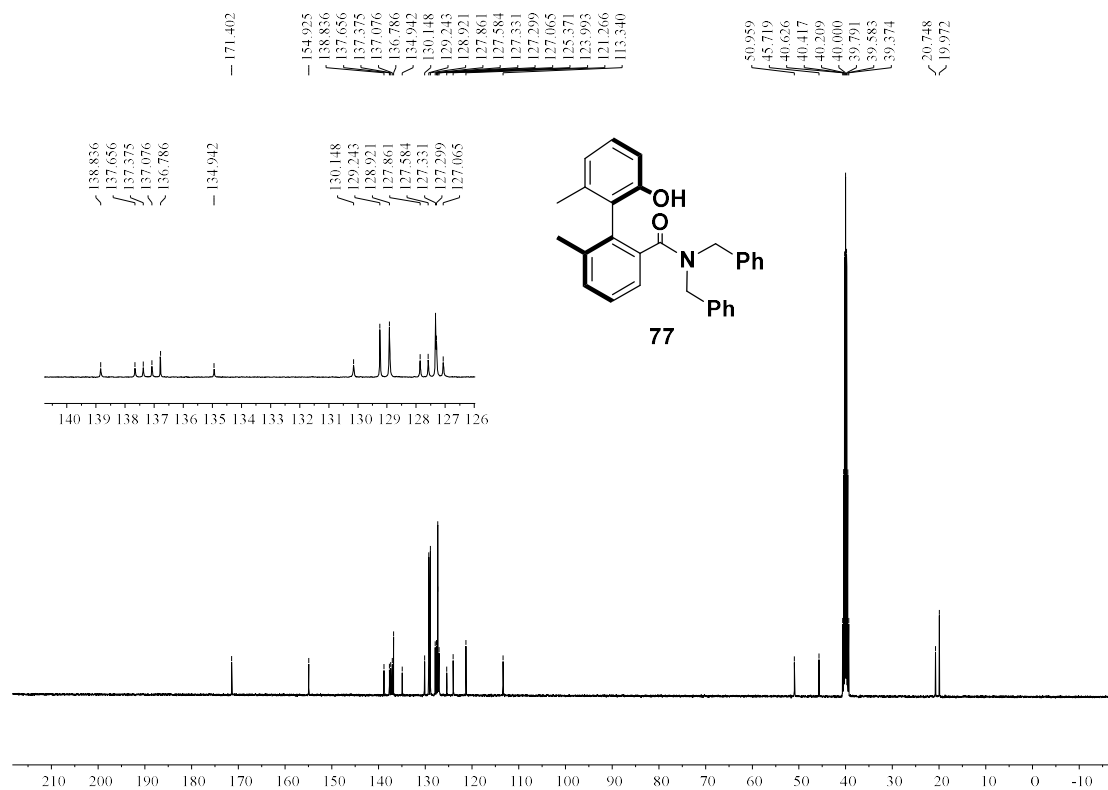

**Figure S156. <sup>13</sup>C NMR Spectrum of 77**

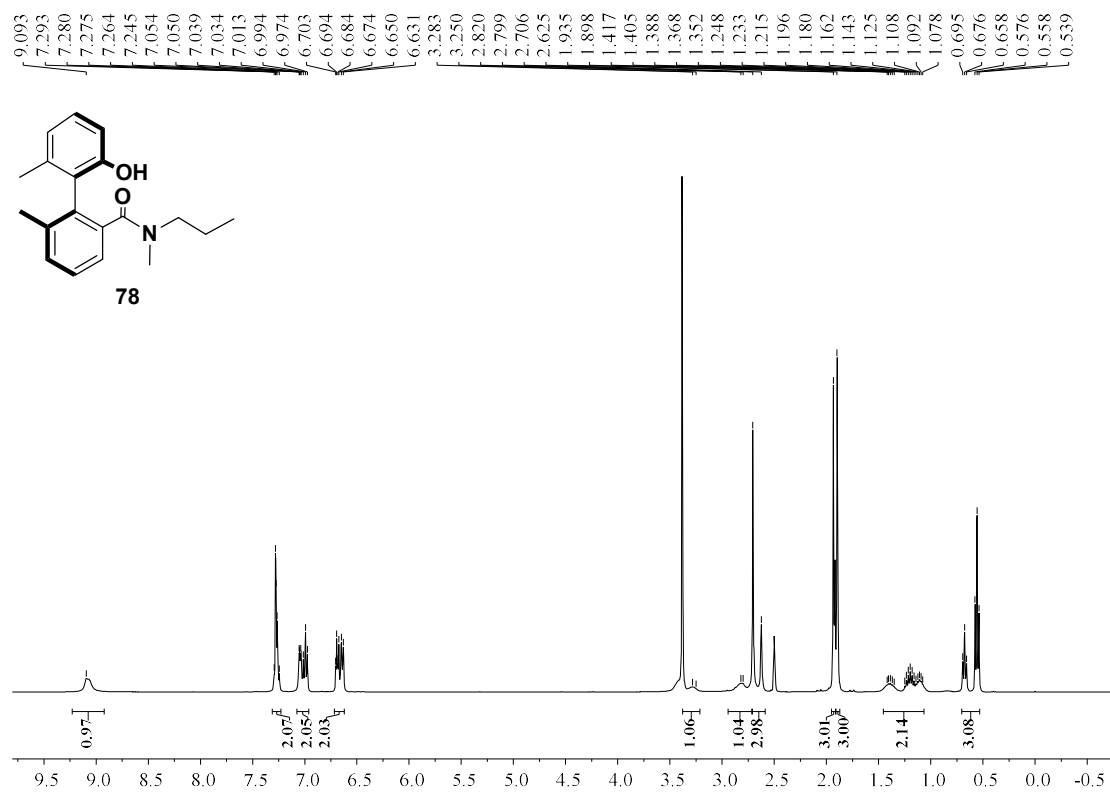

Figure S157. <sup>1</sup>H NMR Spectrum of **78**

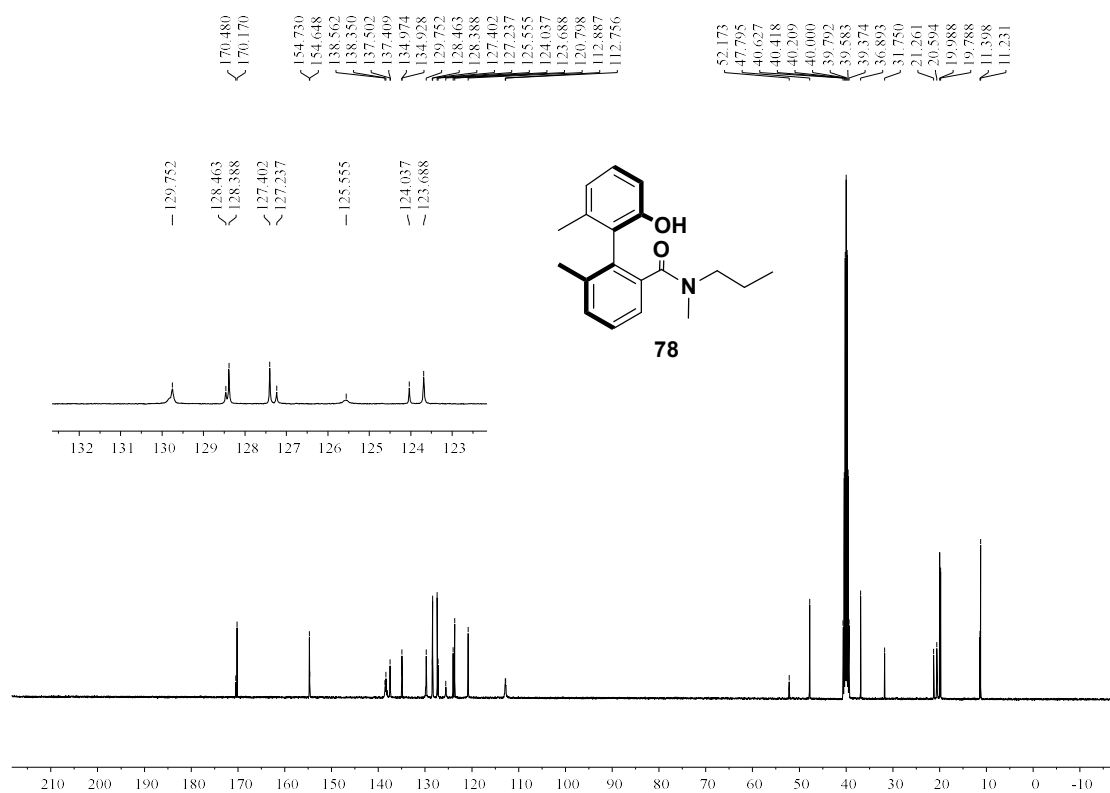

Figure S158. <sup>13</sup>C NMR Spectrum of **78**

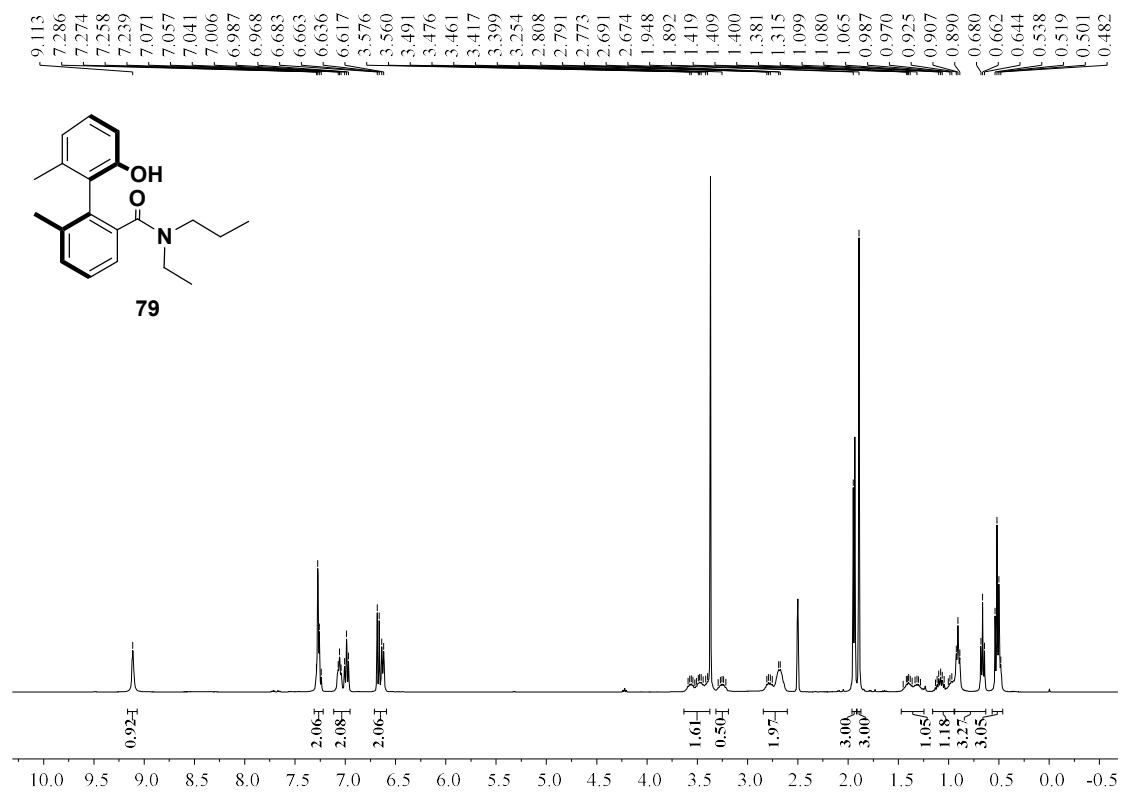

Figure S159. <sup>1</sup>H NMR Spectrum of **79**

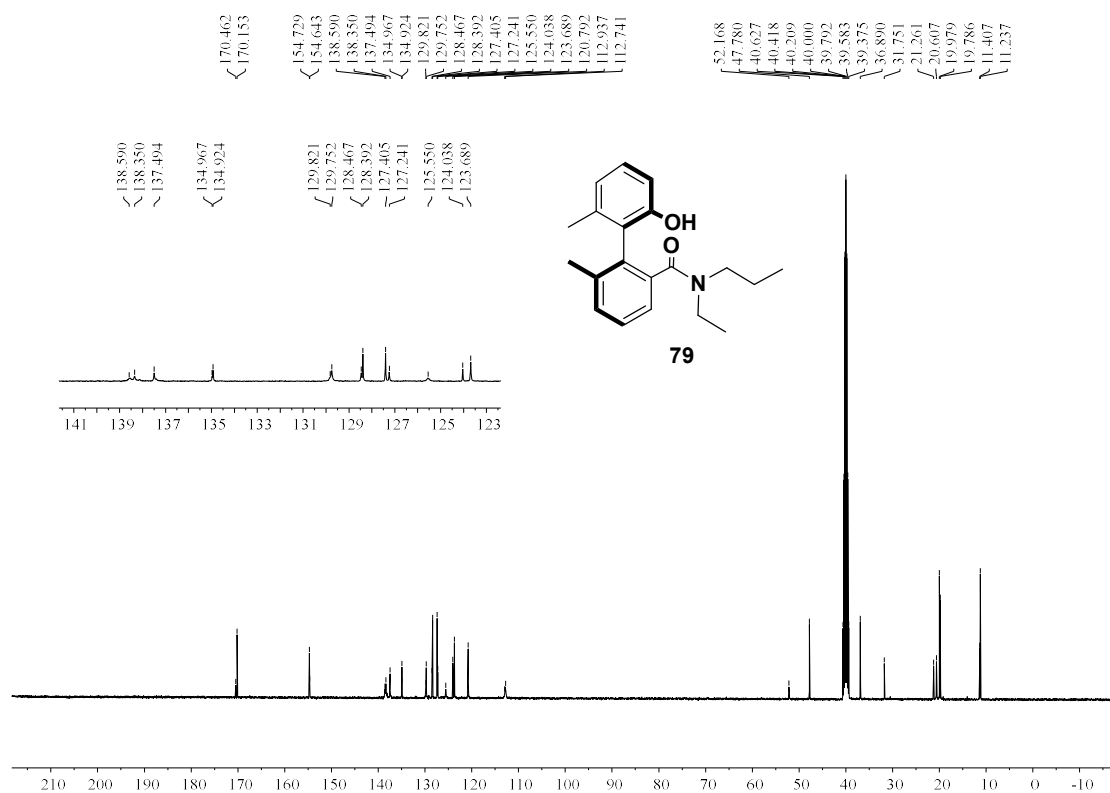

Figure S160. <sup>13</sup>C NMR Spectrum of **79**

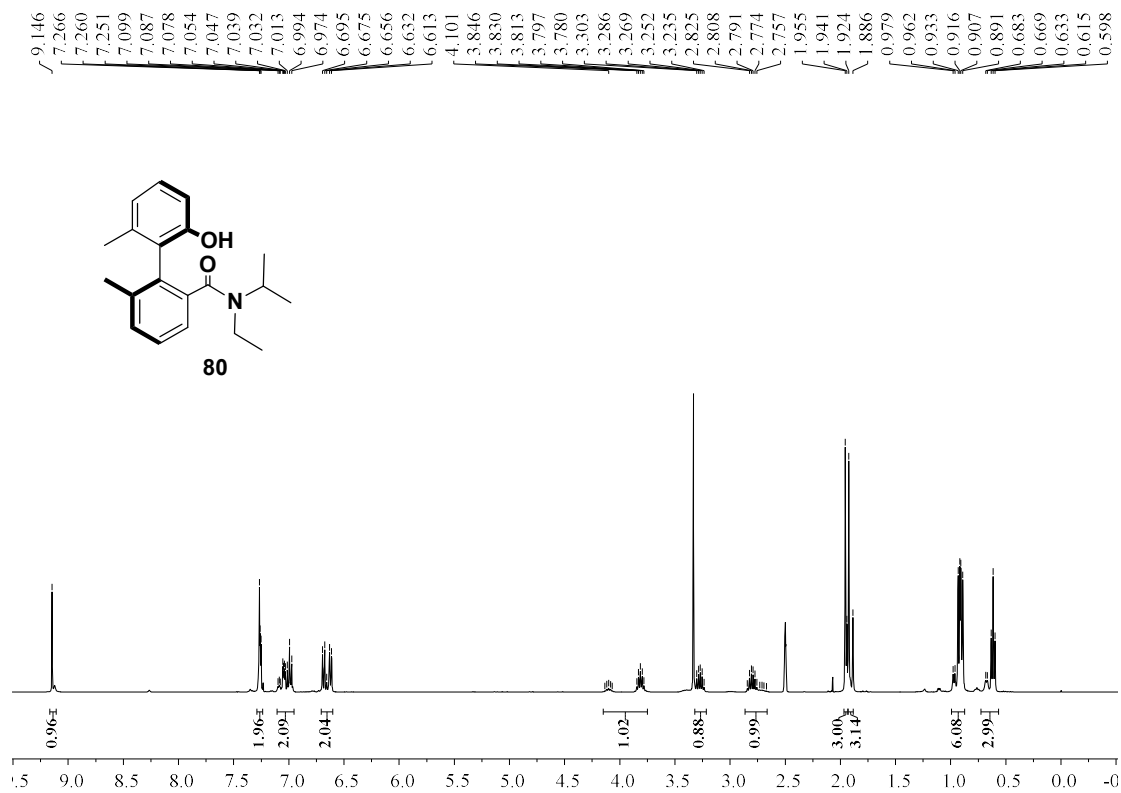

Figure S161. <sup>1</sup>H NMR Spectrum of **80**

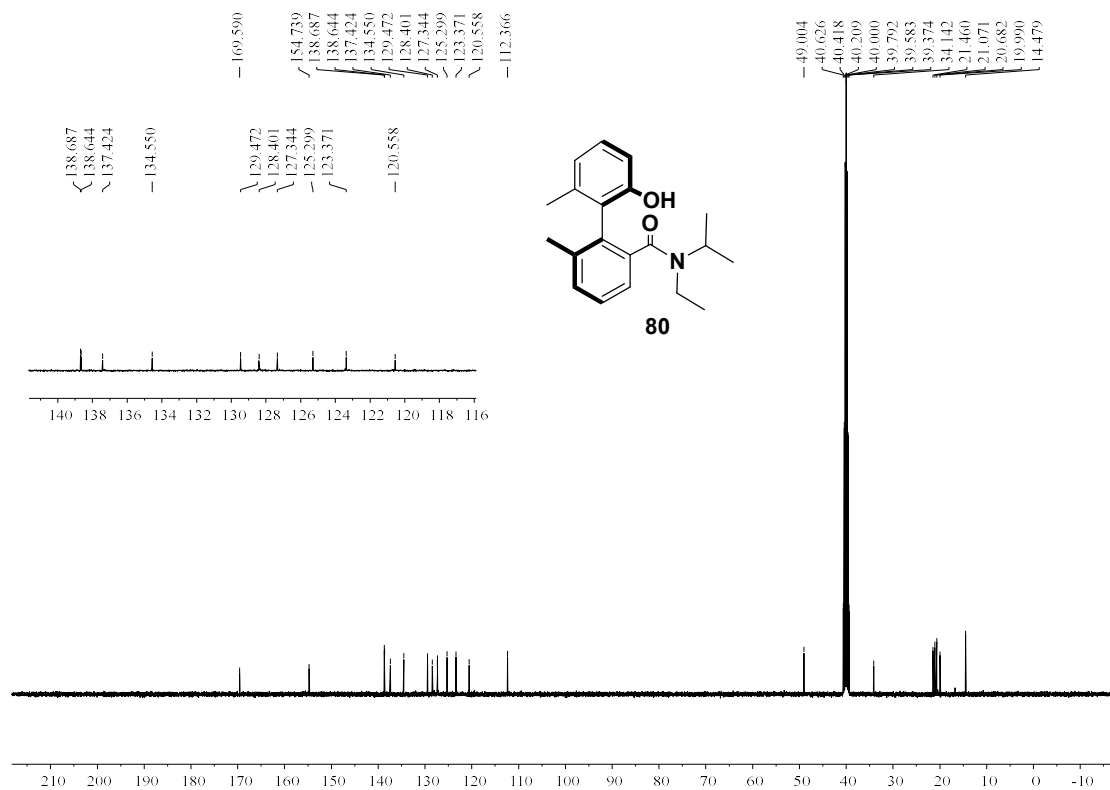

Figure S162. <sup>13</sup>C NMR Spectrum of **80**

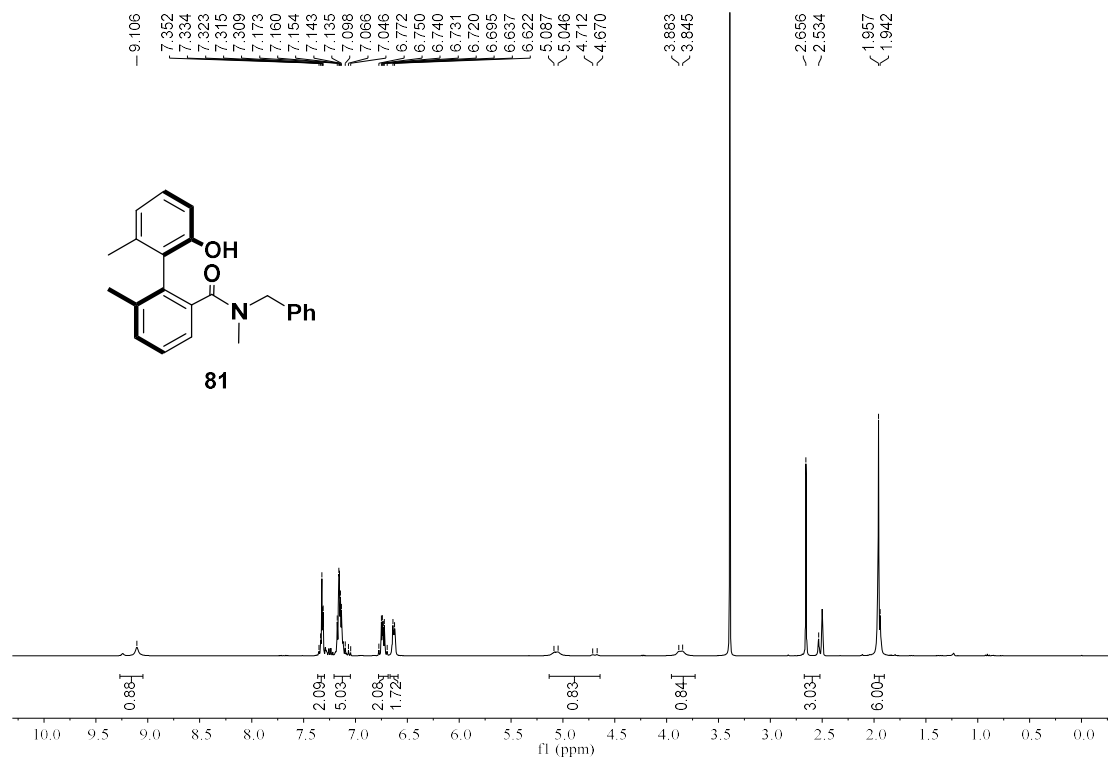

Figure S163. <sup>1</sup>H NMR Spectrum of 81

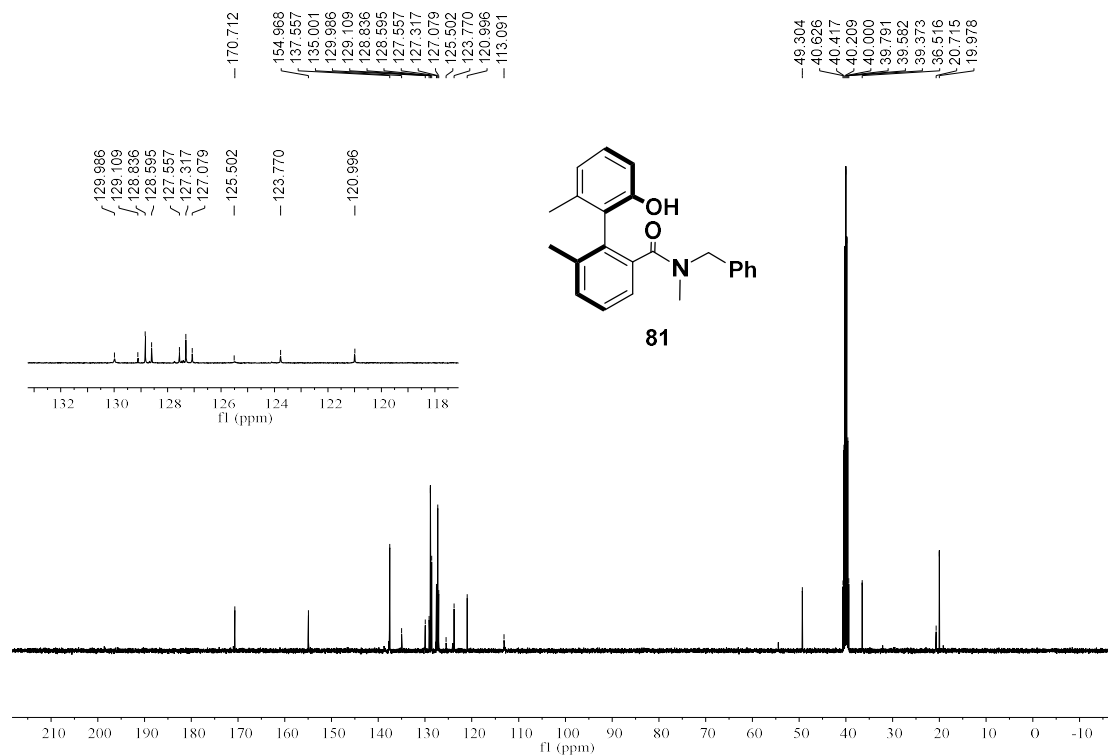

Figure S164. <sup>13</sup>C NMR Spectrum of 81

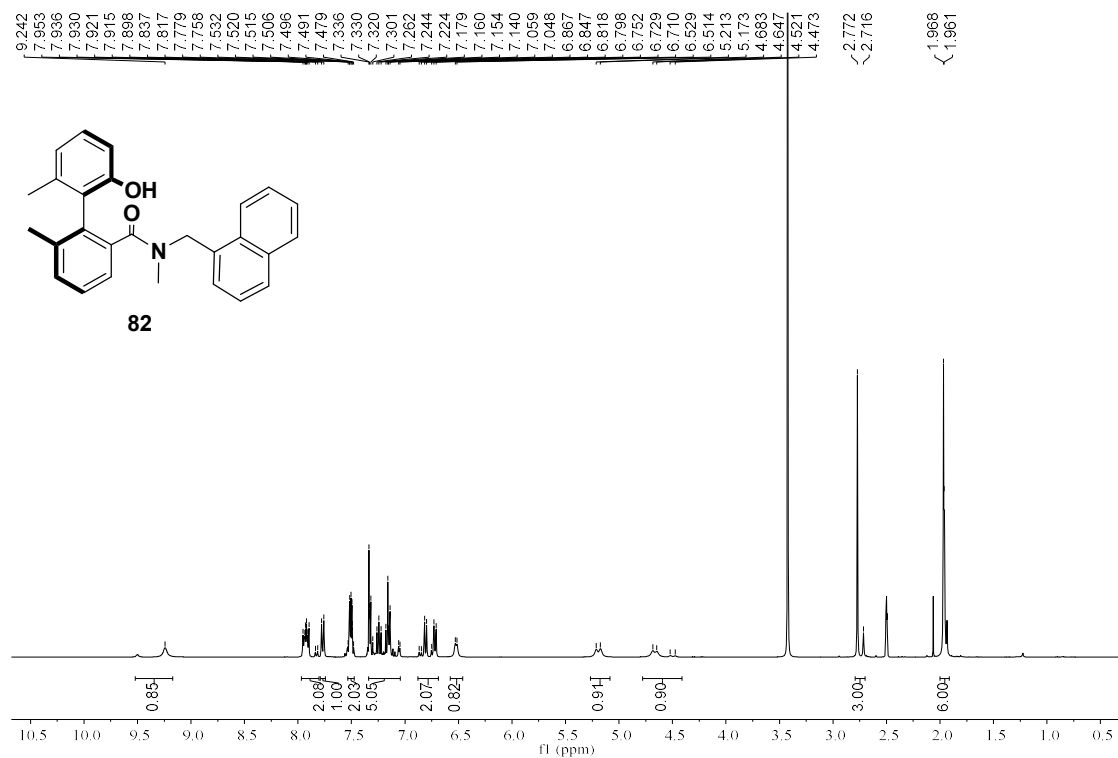

Figure S165. <sup>1</sup>H NMR Spectrum of 82

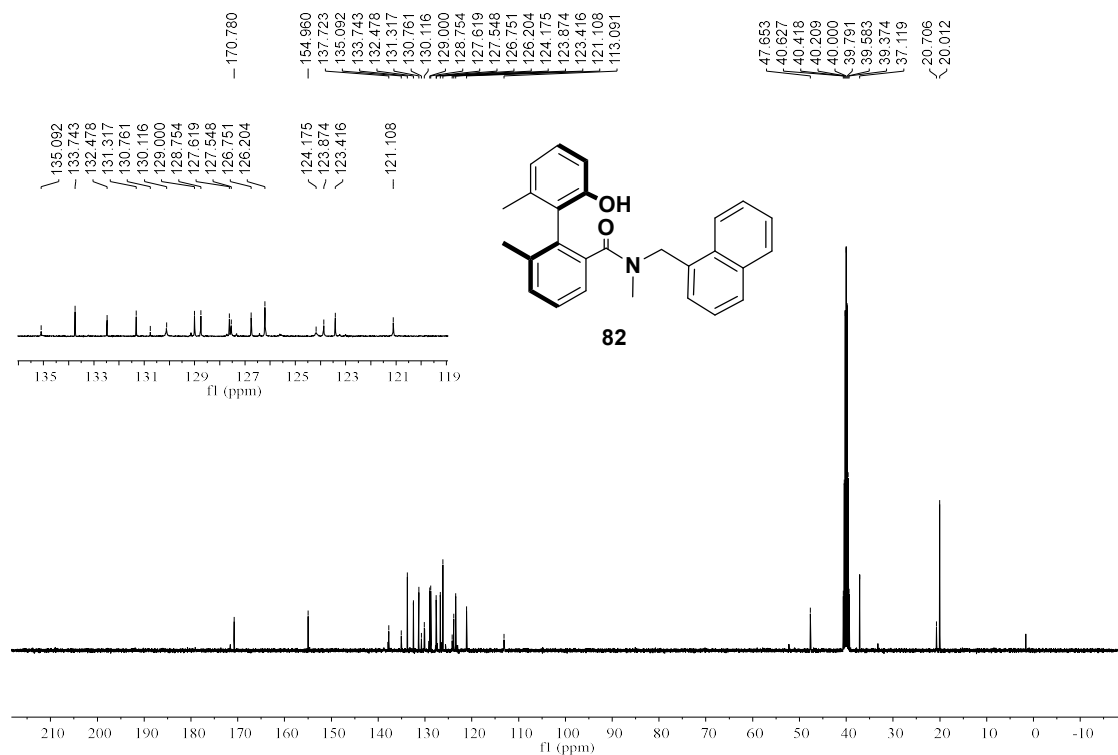

Figure S166. <sup>13</sup>C NMR Spectrum of 82

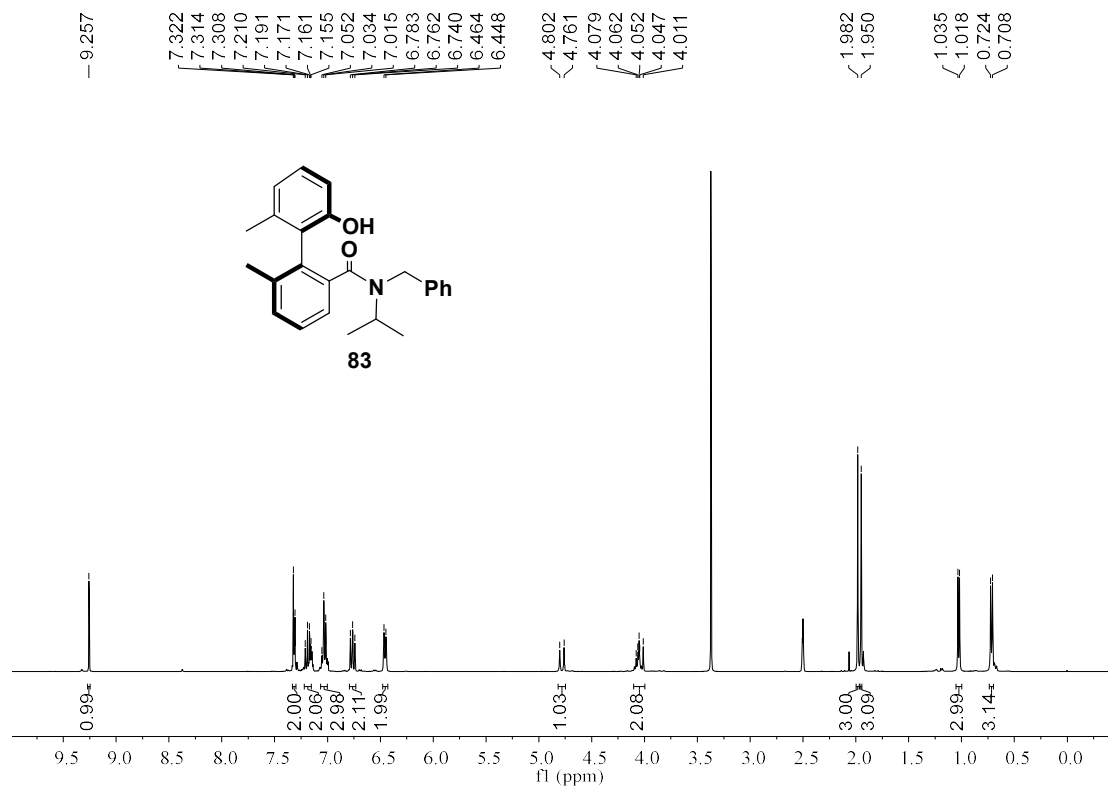

Figure S167. <sup>1</sup>H NMR Spectrum of **83**

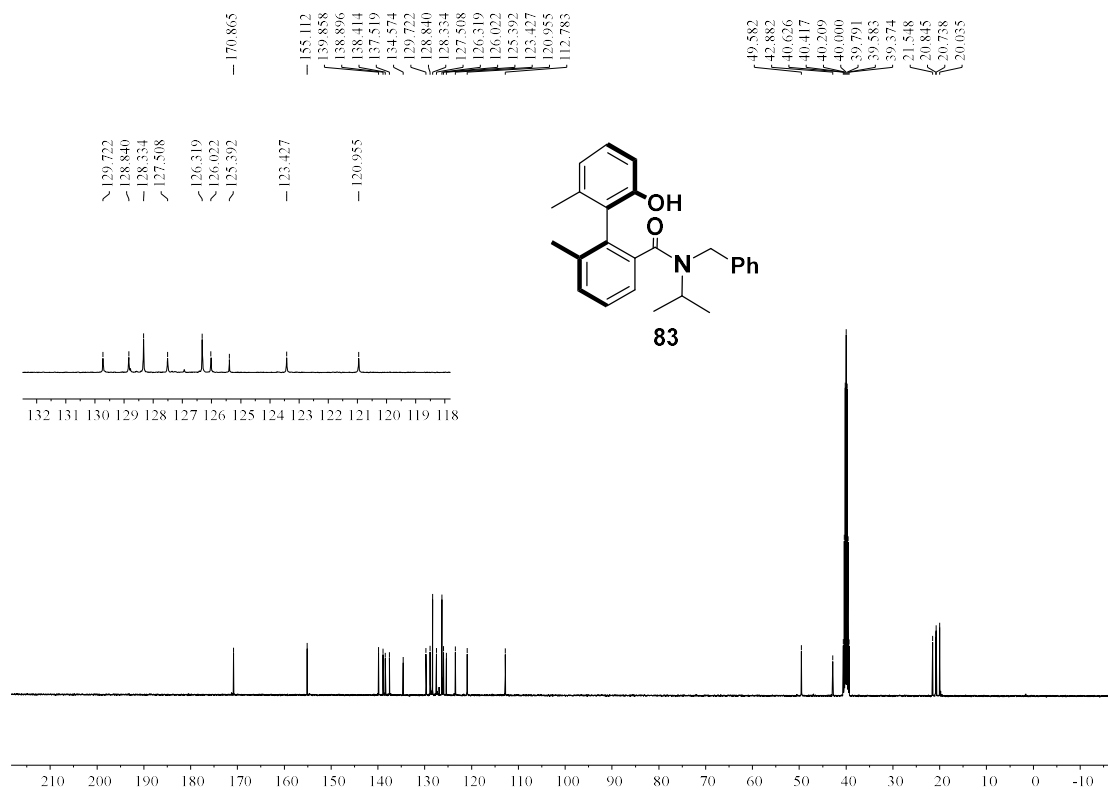

Figure S168. <sup>13</sup>C NMR Spectrum of **83**



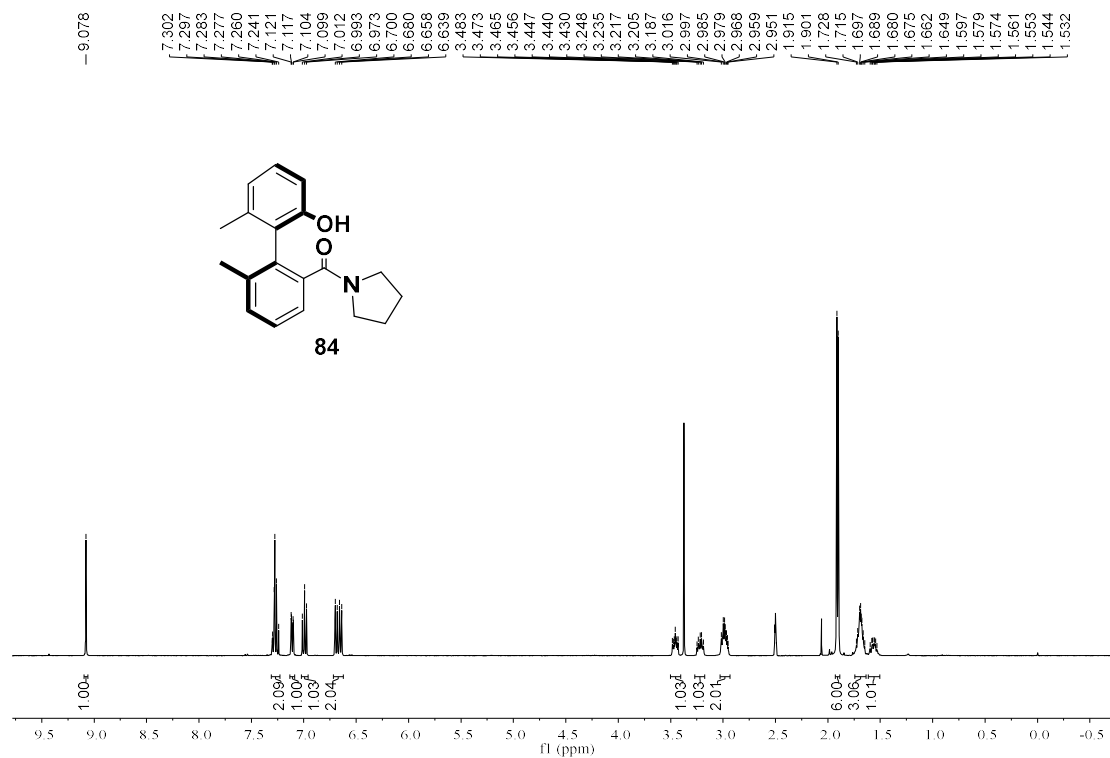

Figure S169. <sup>1</sup>H NMR Spectrum of **84**

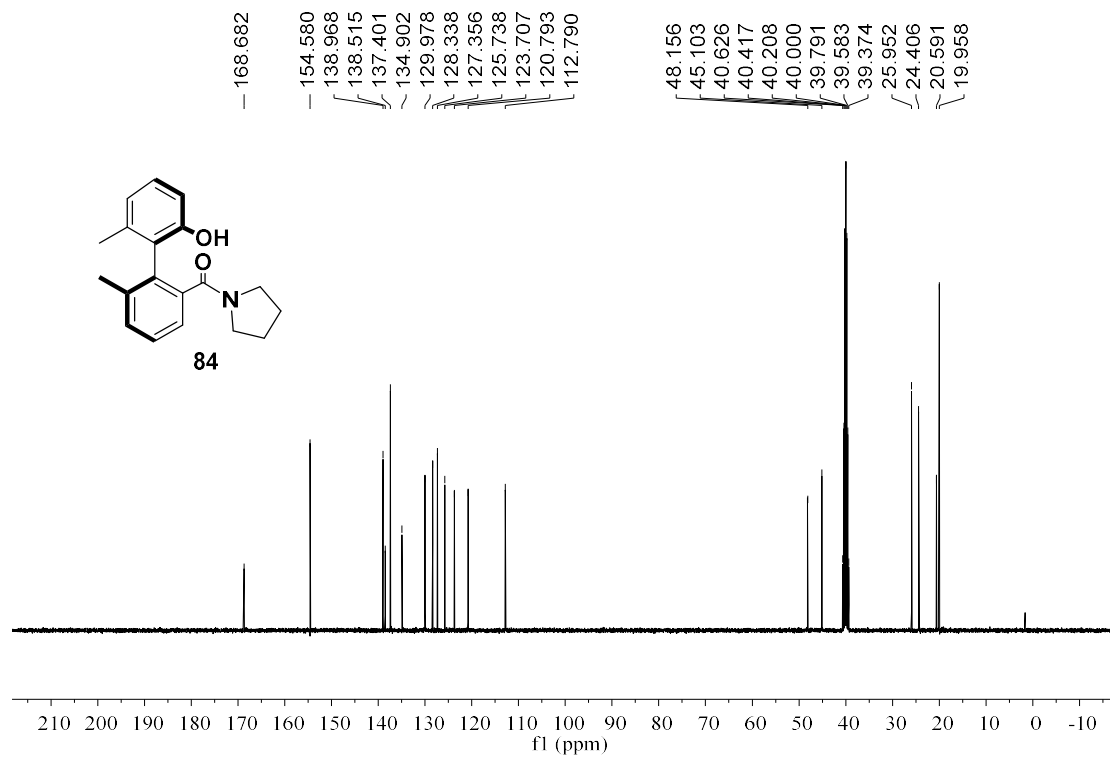

Figure S170. <sup>13</sup>C NMR Spectrum of **84**

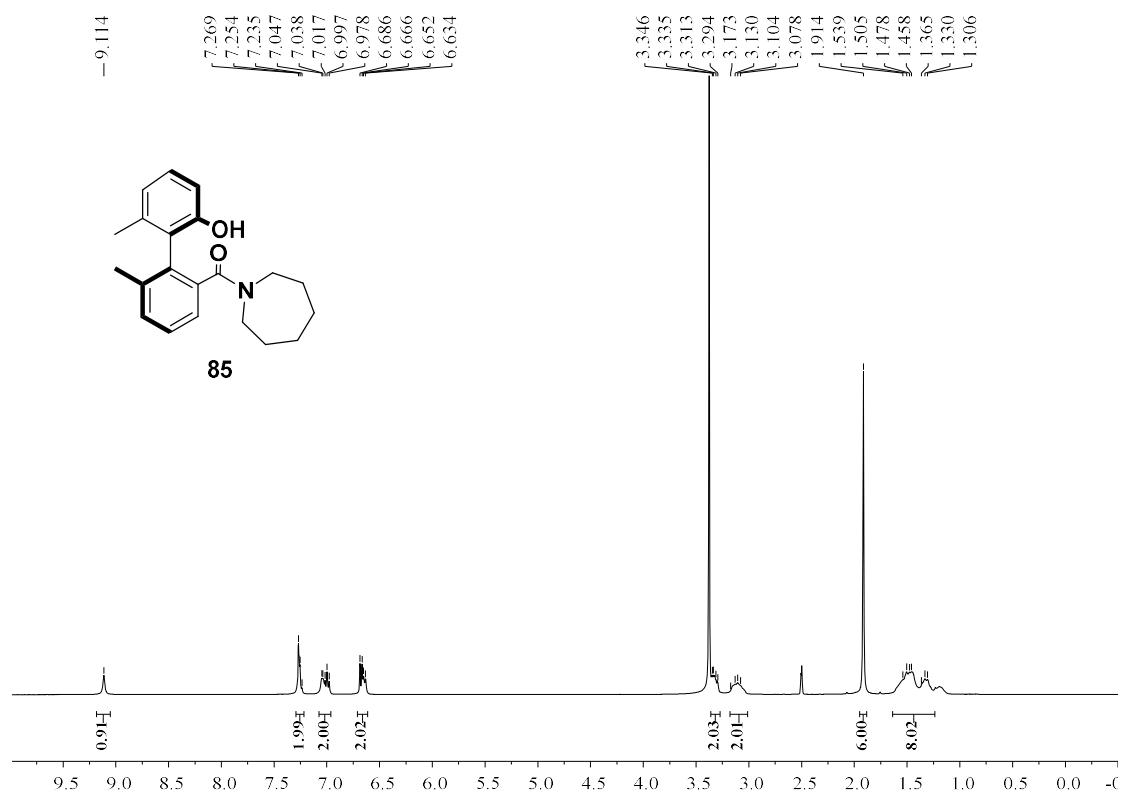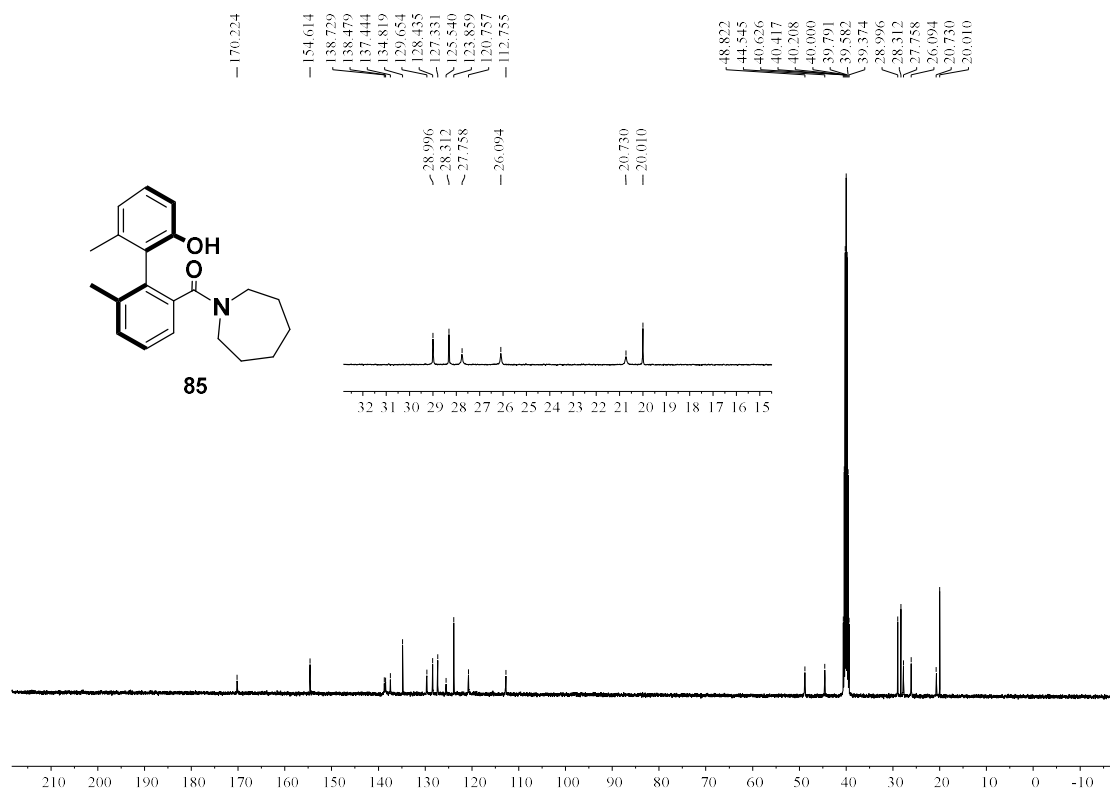

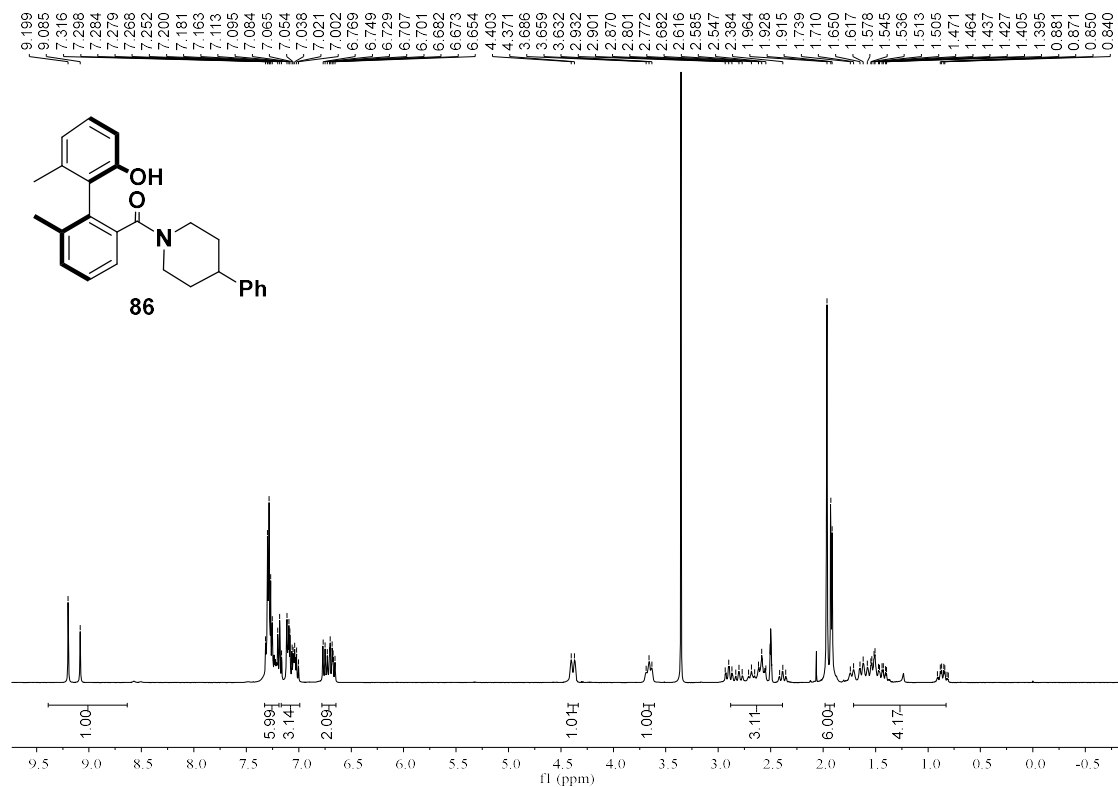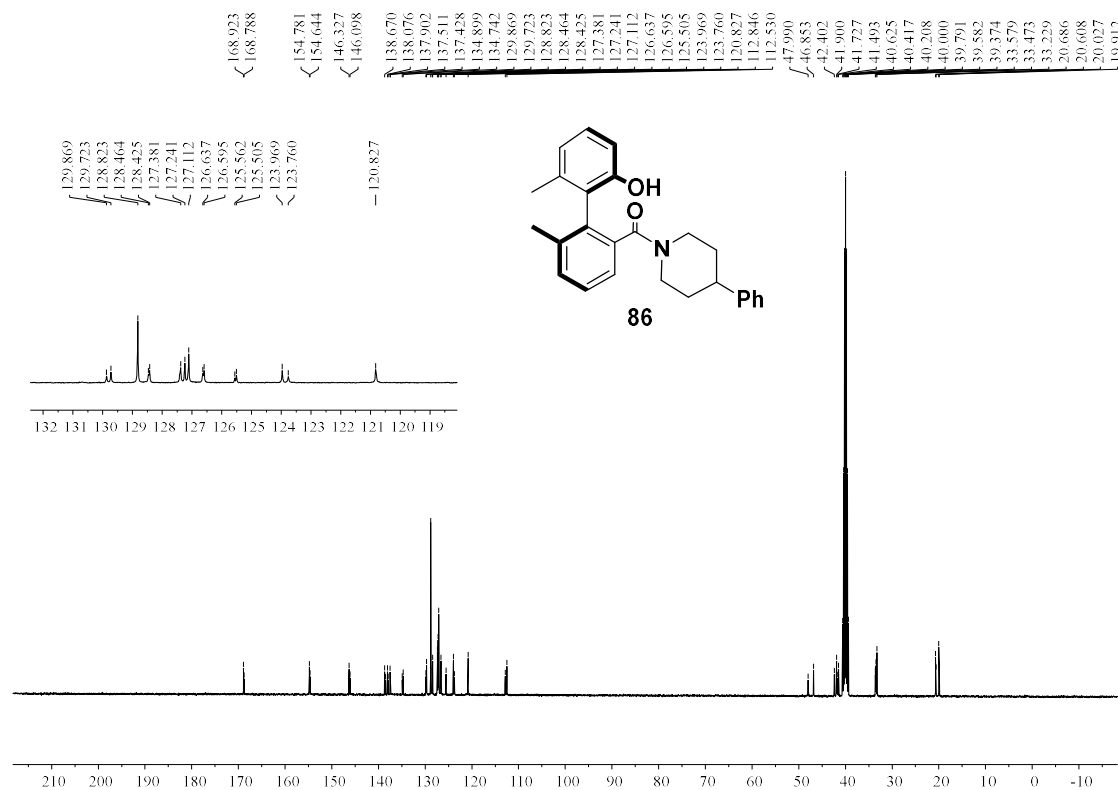

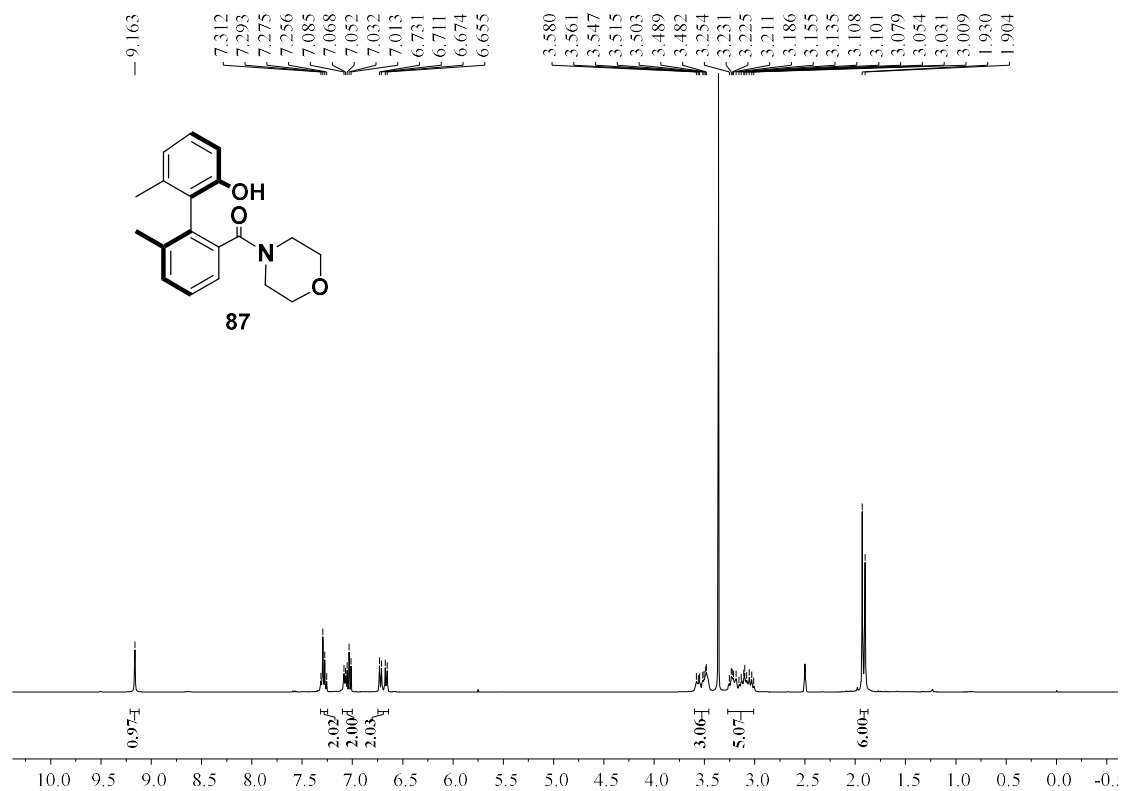

Figure S175. <sup>1</sup>H NMR Spectrum of **87**

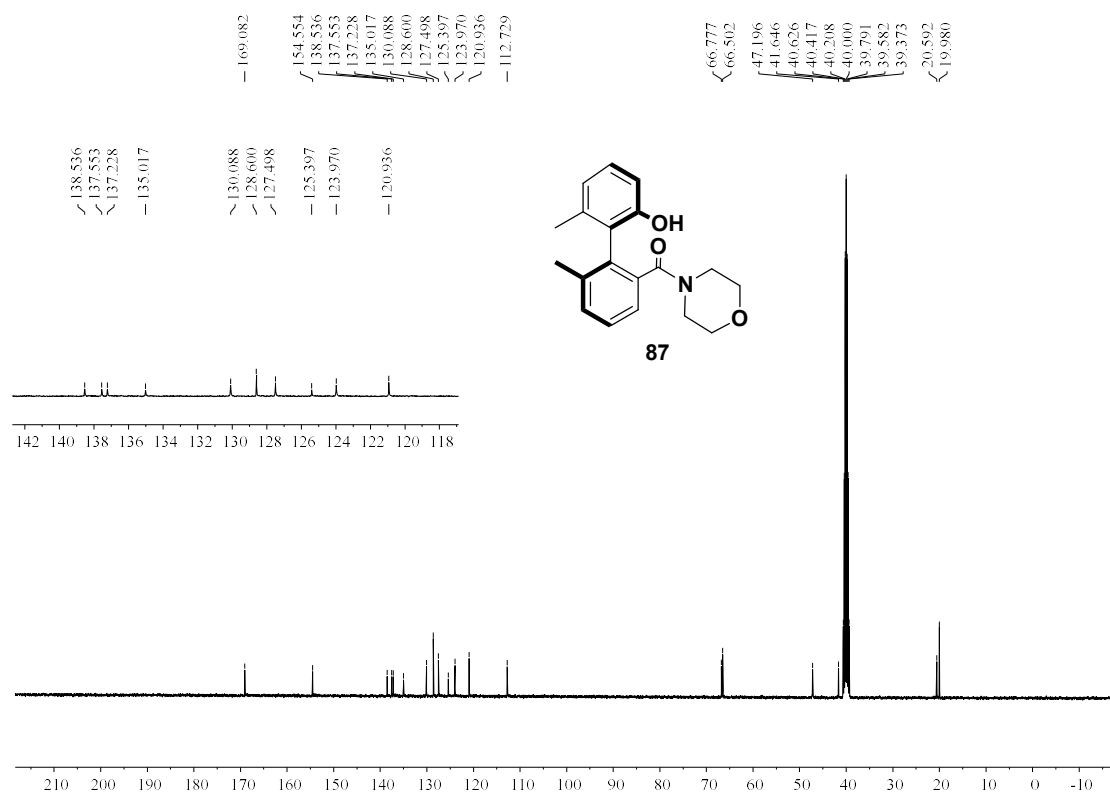

Figure S176. <sup>13</sup>C NMR Spectrum of **87**

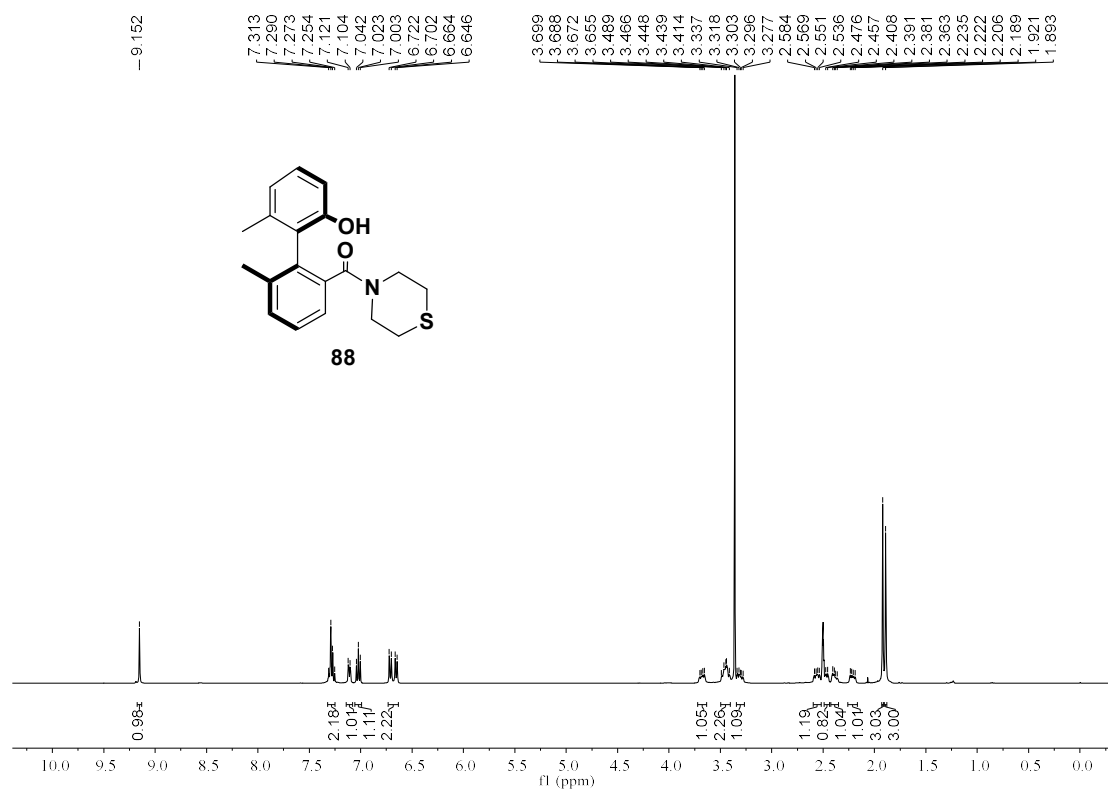

Figure S177. <sup>1</sup>H NMR Spectrum of **88**

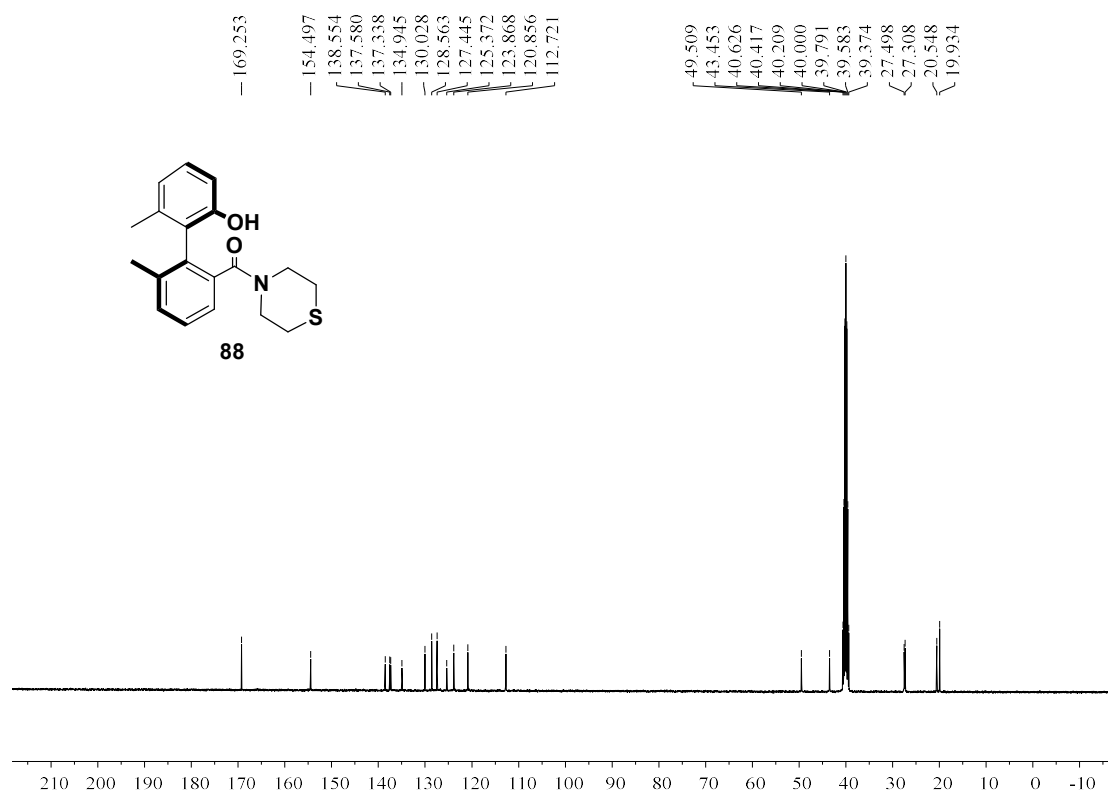

Figure S178. <sup>13</sup>C NMR Spectrum of **88**

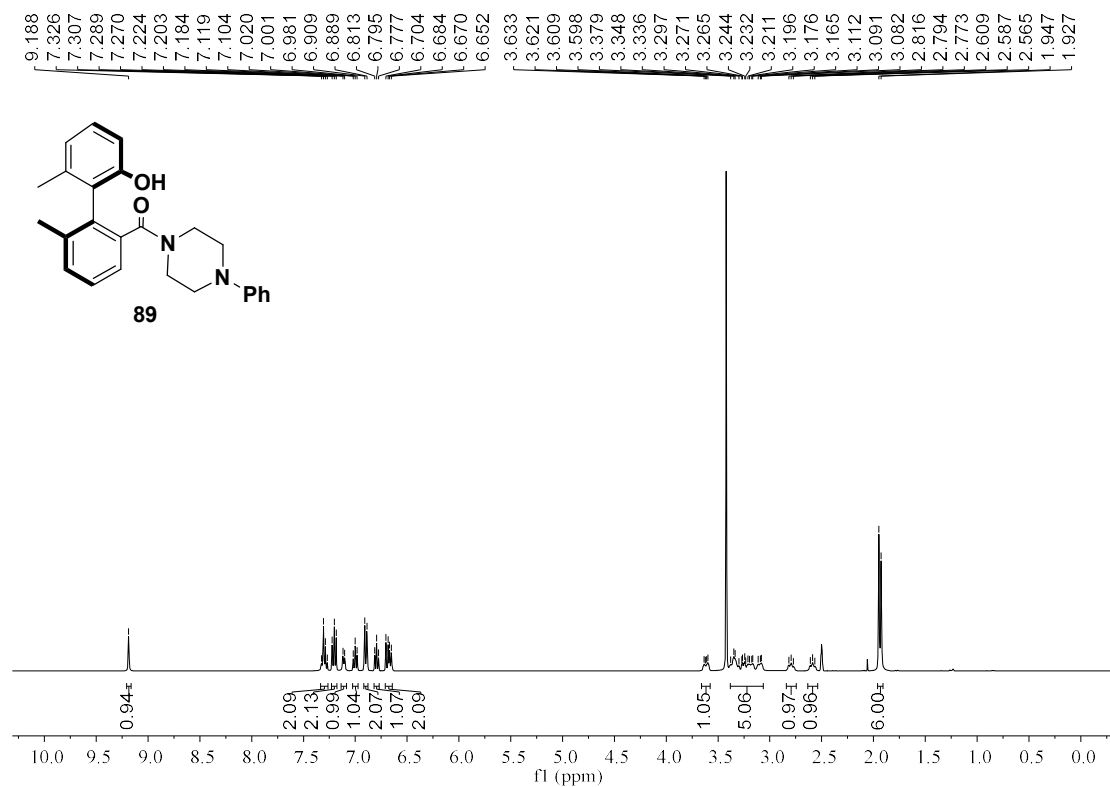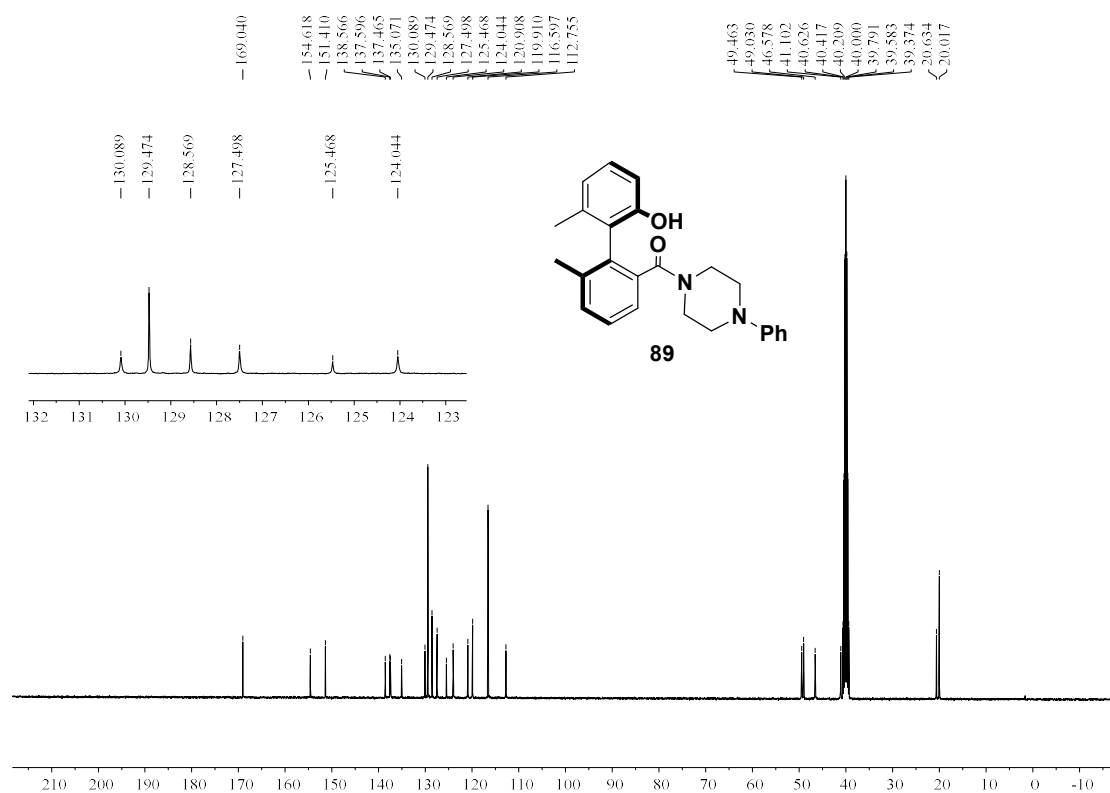

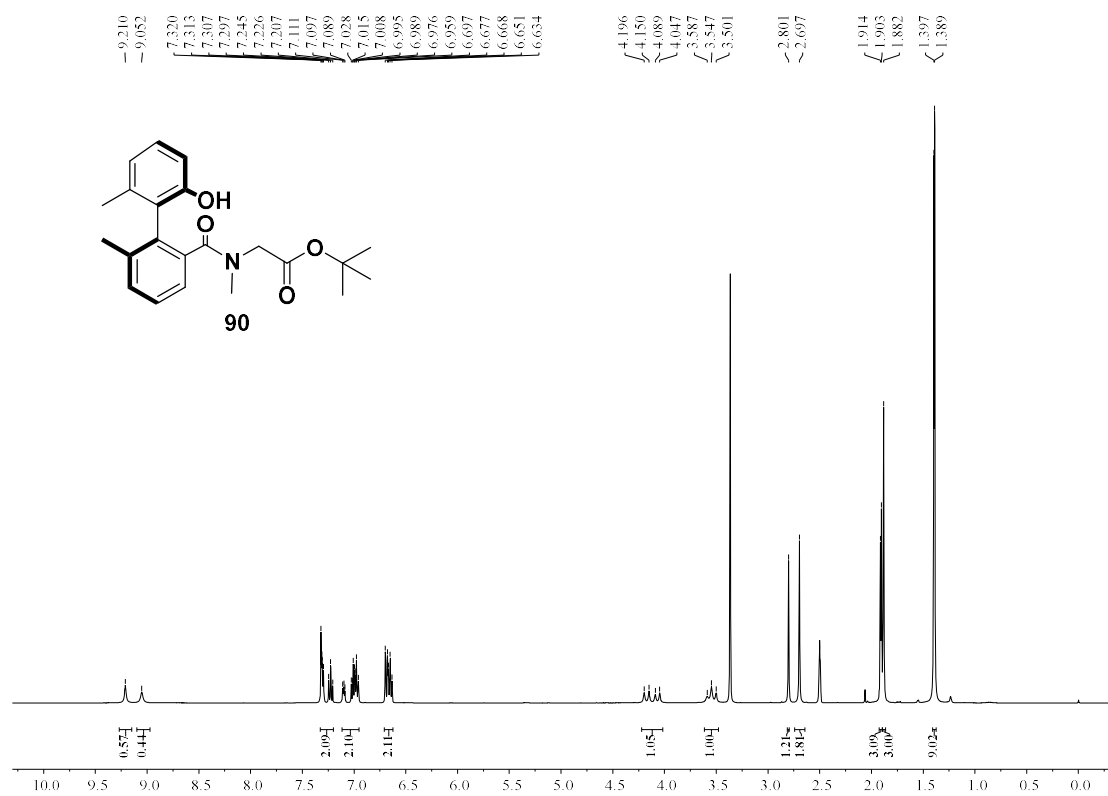

Figure S181. <sup>1</sup>H NMR Spectrum of **90**

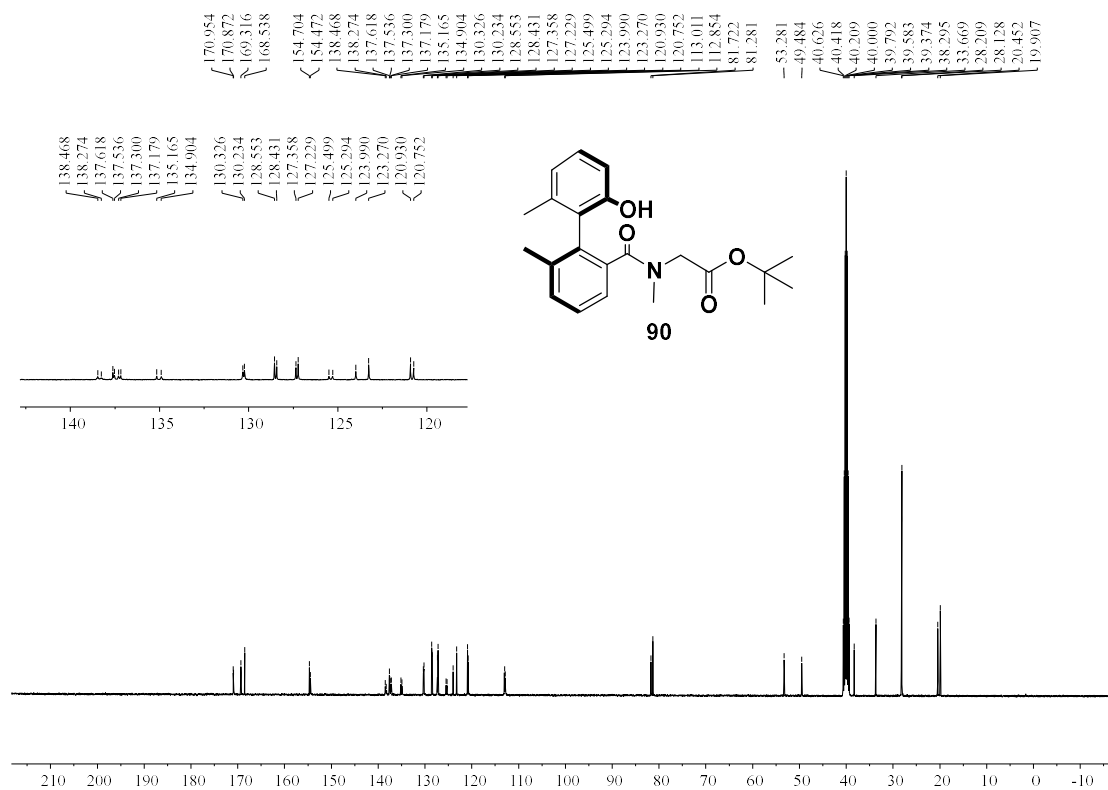

Figure S182. <sup>13</sup>C NMR Spectrum of **90**

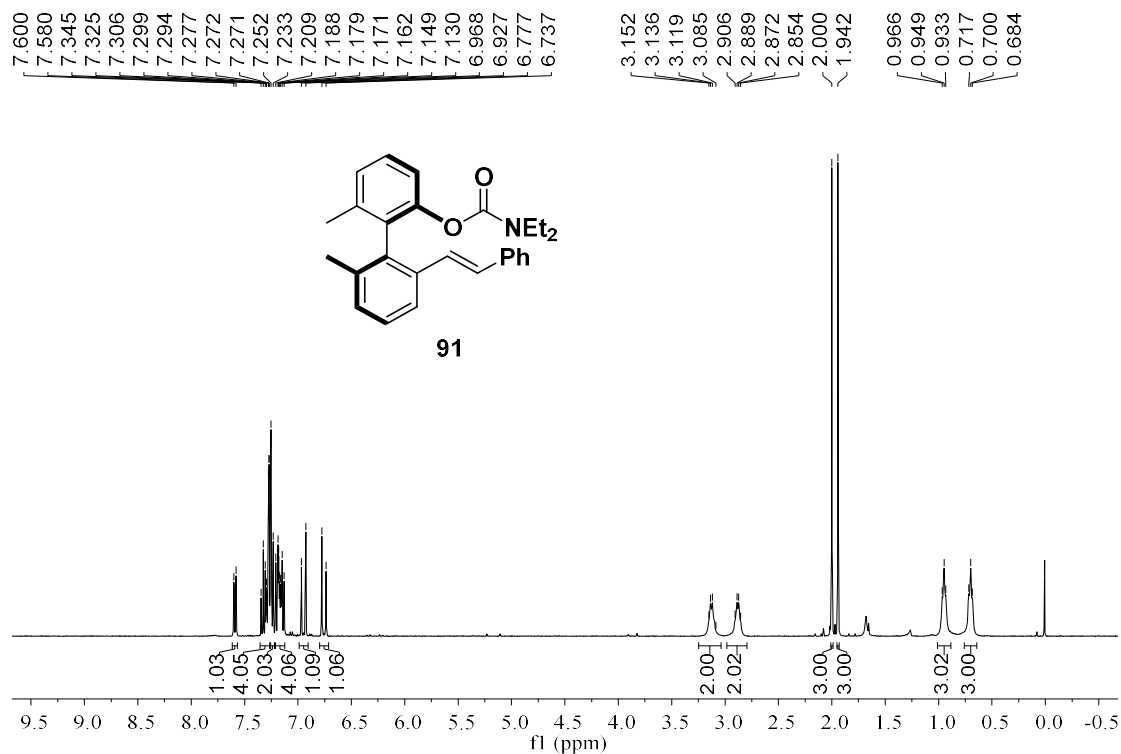

Figure S183. <sup>1</sup>H NMR Spectrum of **91**

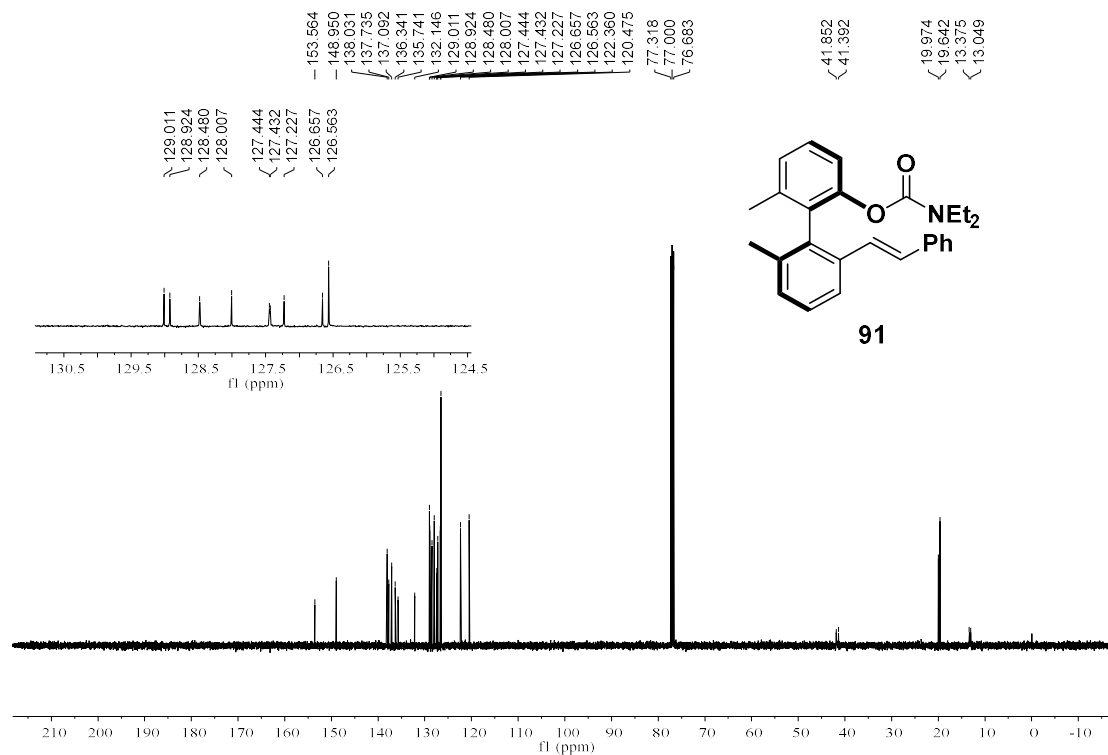

Figure S184. <sup>13</sup>C NMR Spectrum of **91**



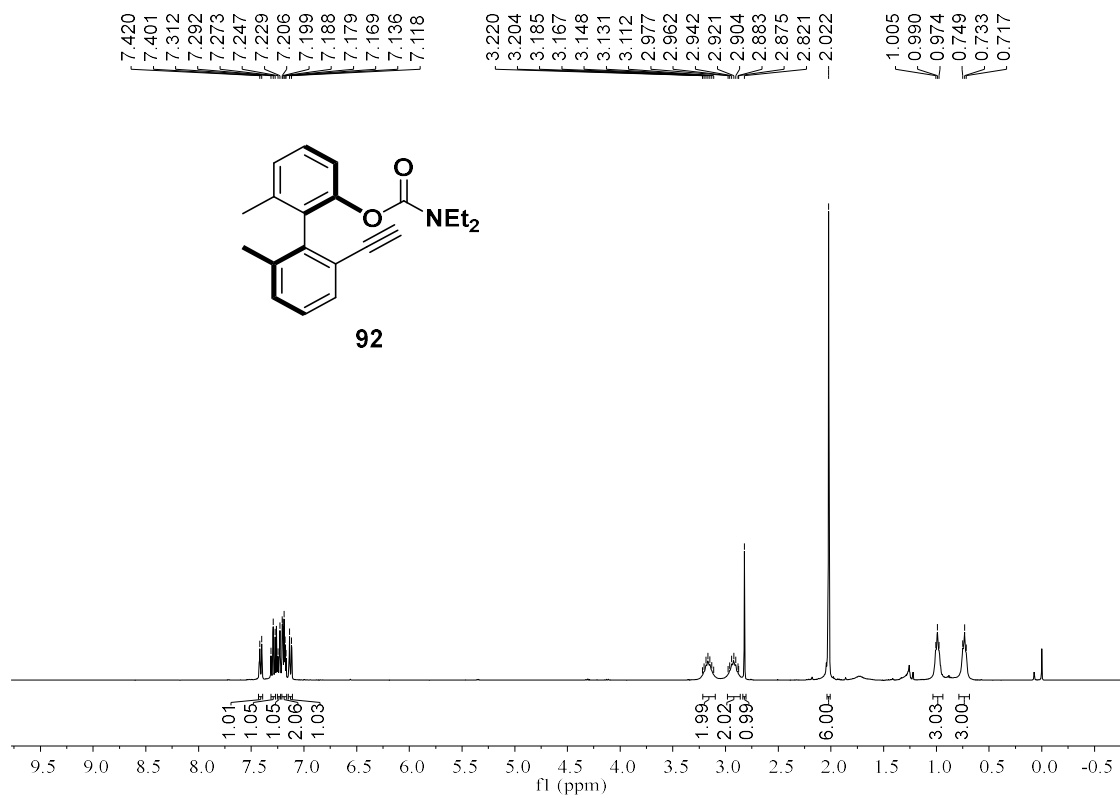

Figure S185. <sup>1</sup>H NMR Spectrum of **92**

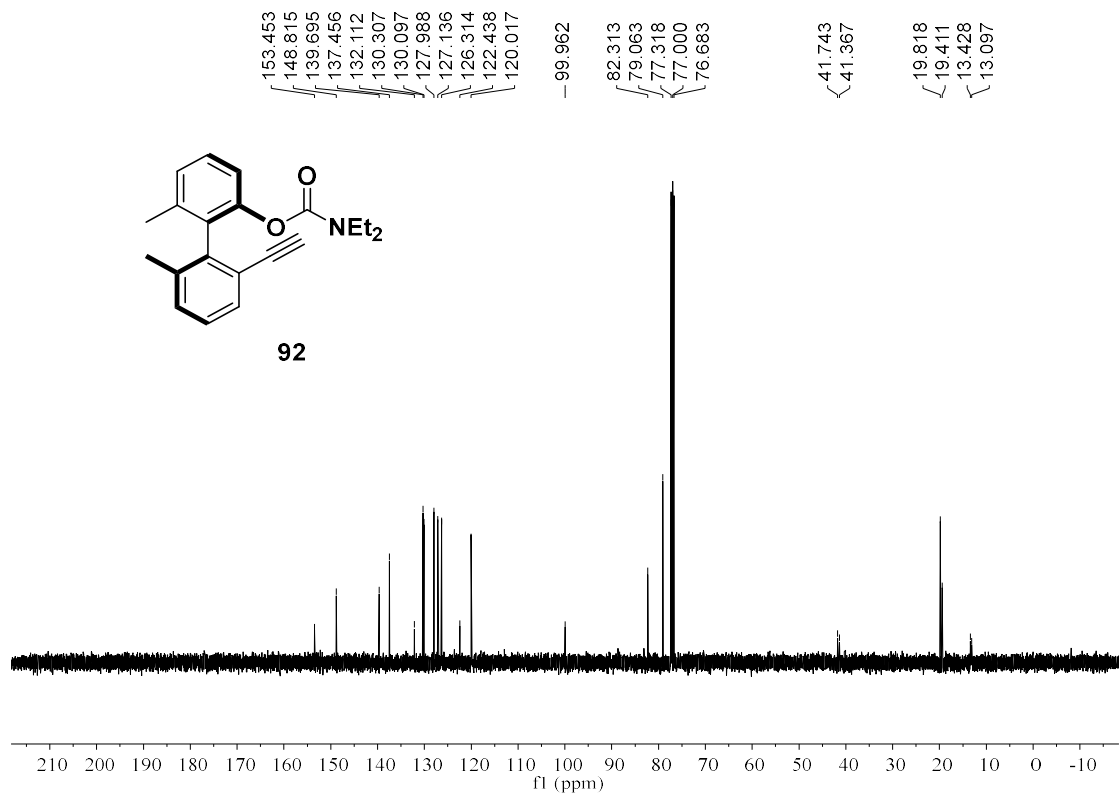

Figure S186. <sup>13</sup>C NMR Spectrum of **92**

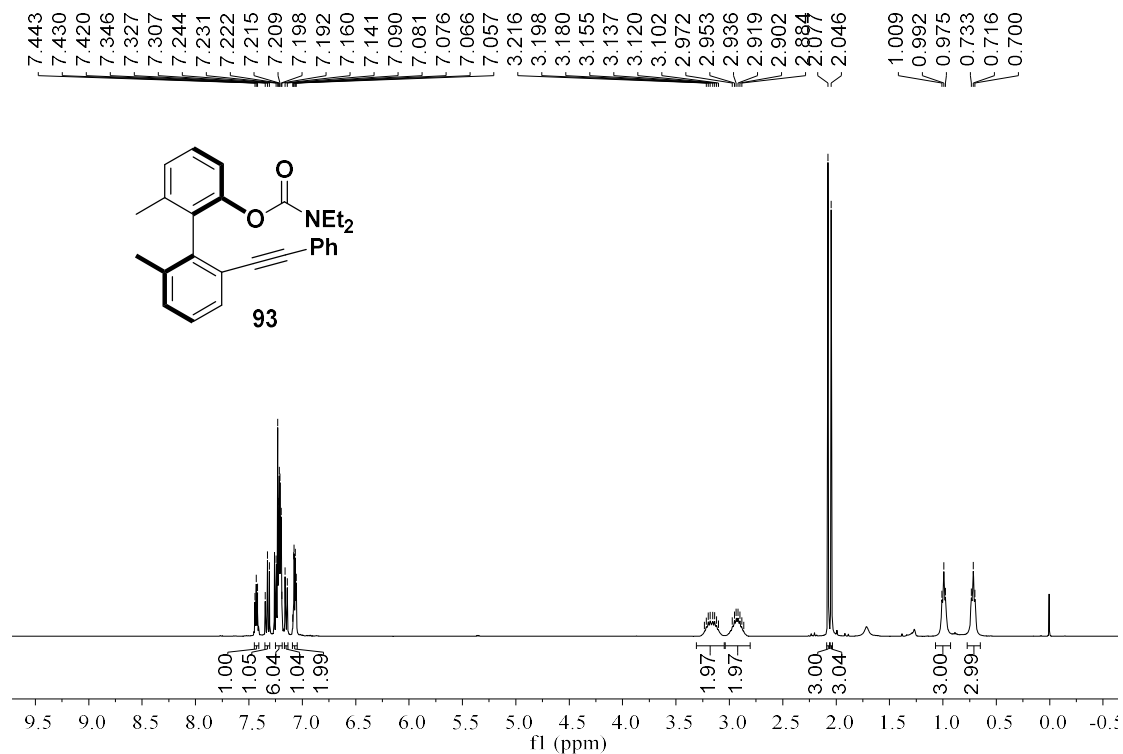

**Figure S187. <sup>1</sup>H NMR Spectrum of 93**

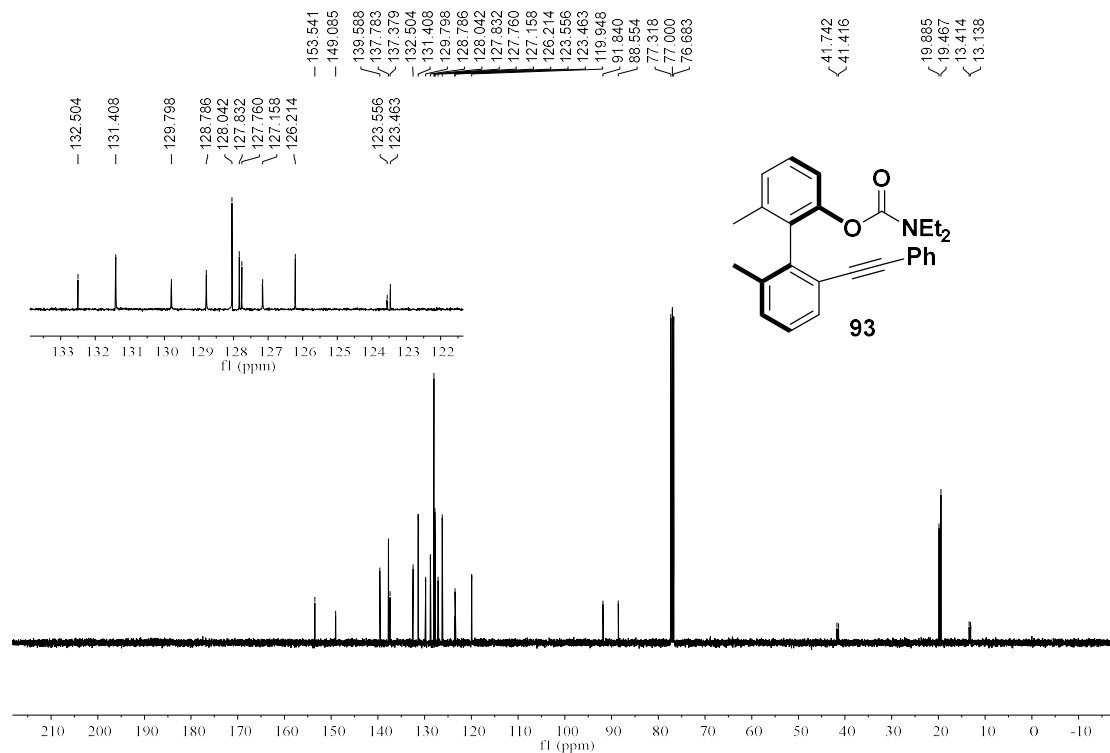

**Figure S188. <sup>13</sup>C NMR Spectrum of 93**

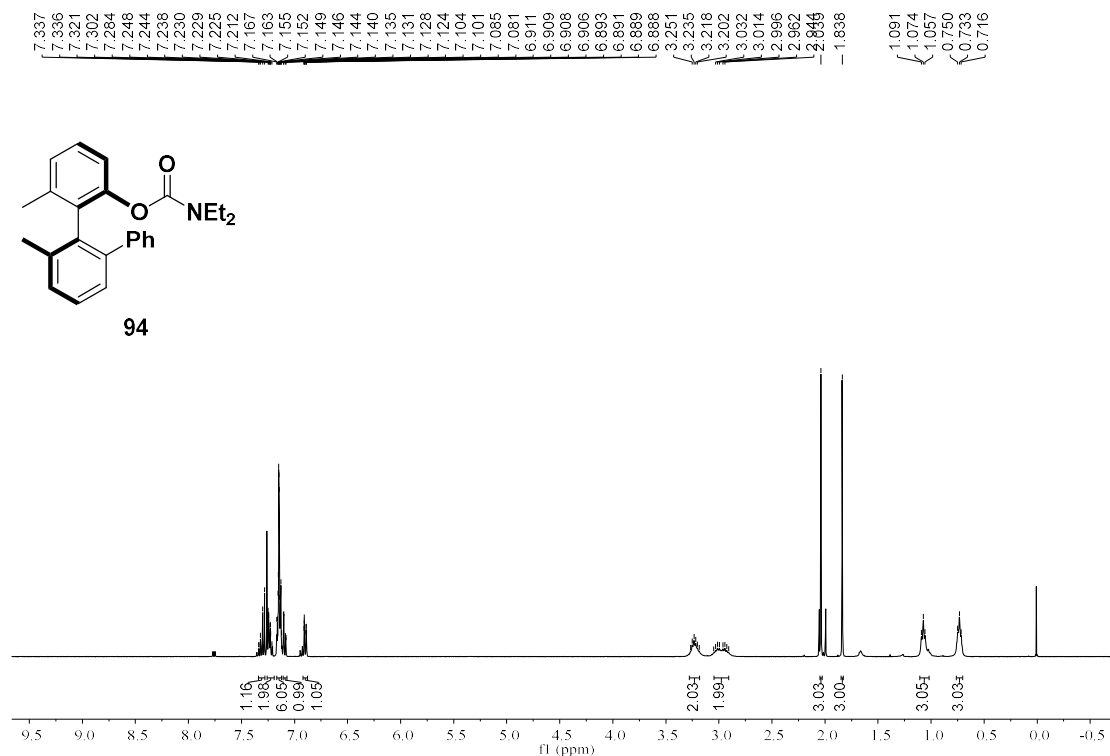

Figure S189. <sup>1</sup>H NMR Spectrum of **94**

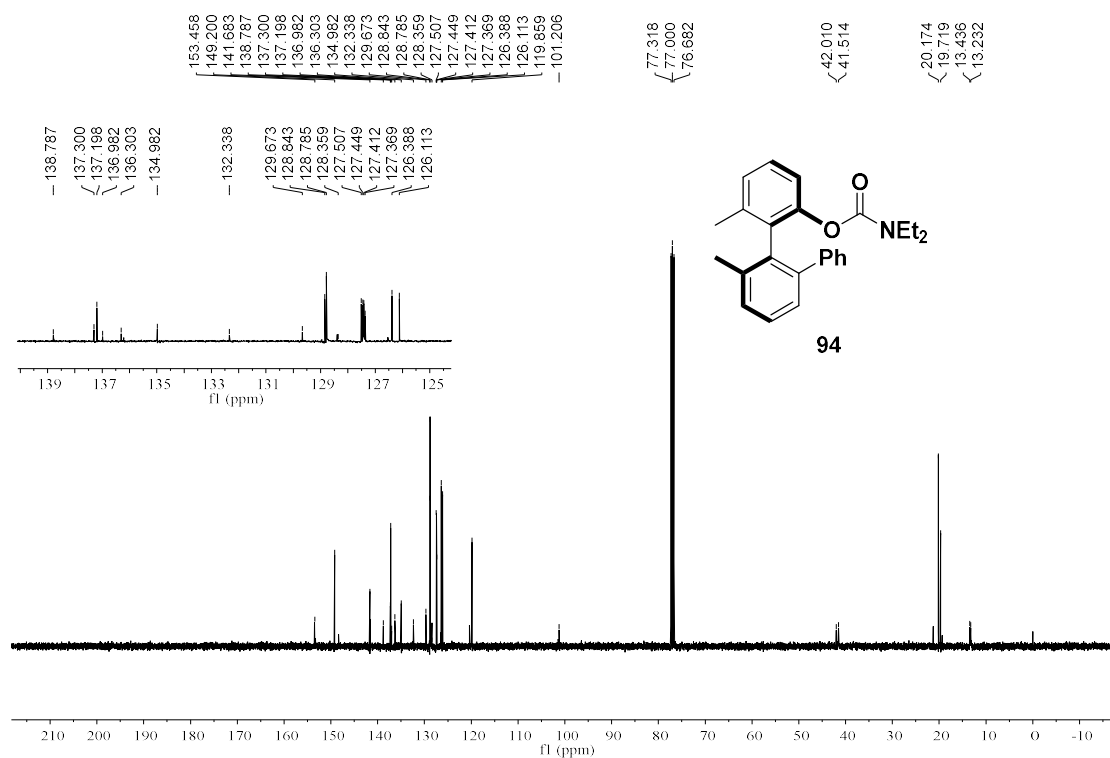

Figure S190. <sup>13</sup>C NMR Spectrum of **94**

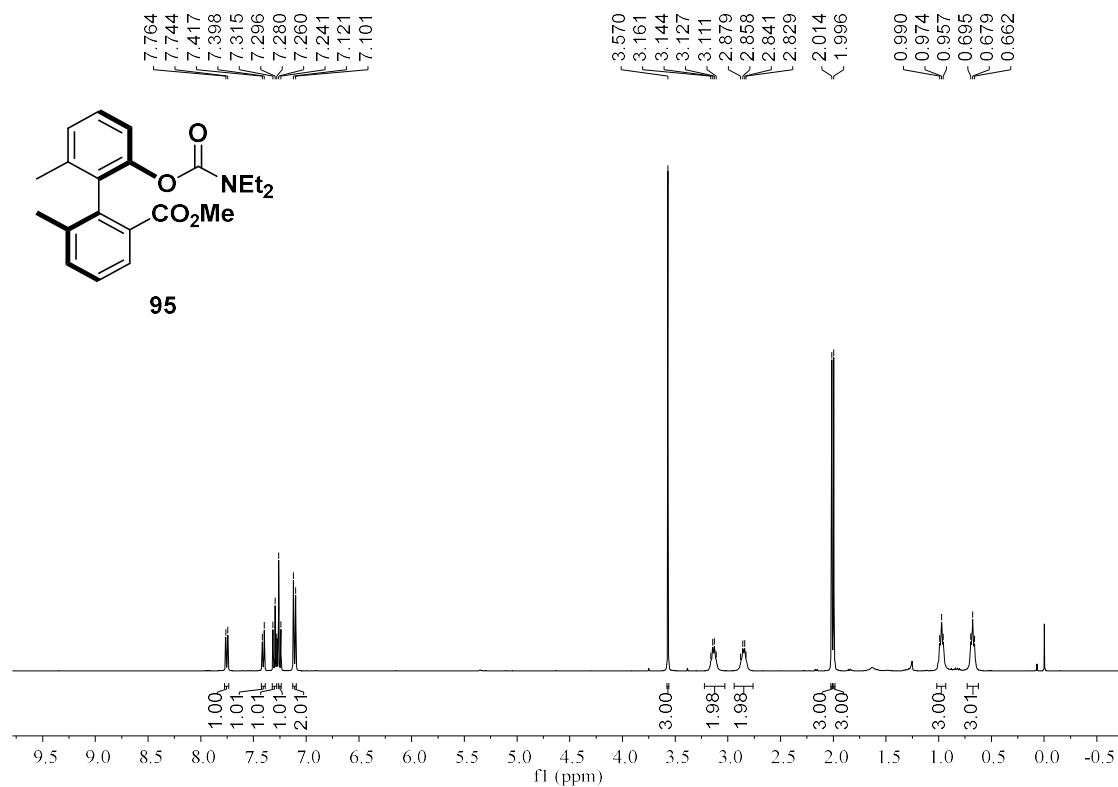

**Figure S191.**  $^1\text{H}$  NMR Spectrum of **95**

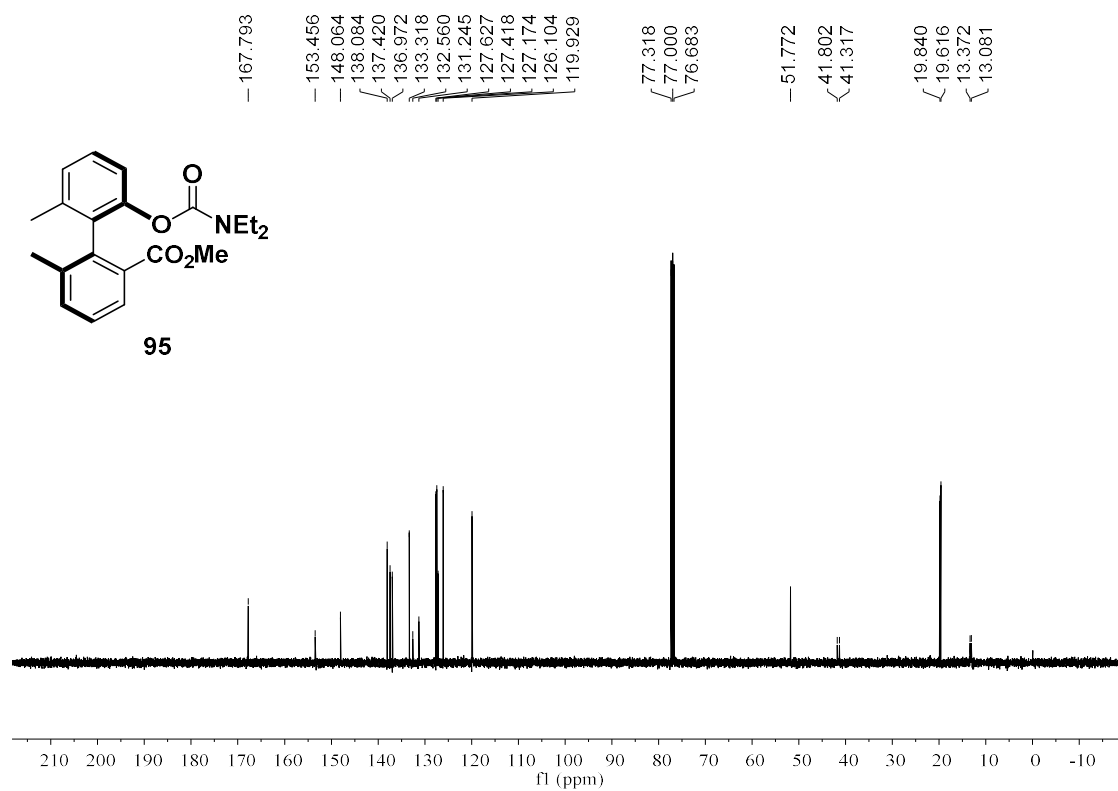

**Figure S191.**  $^{13}\text{C}$  NMR Spectrum of **95**

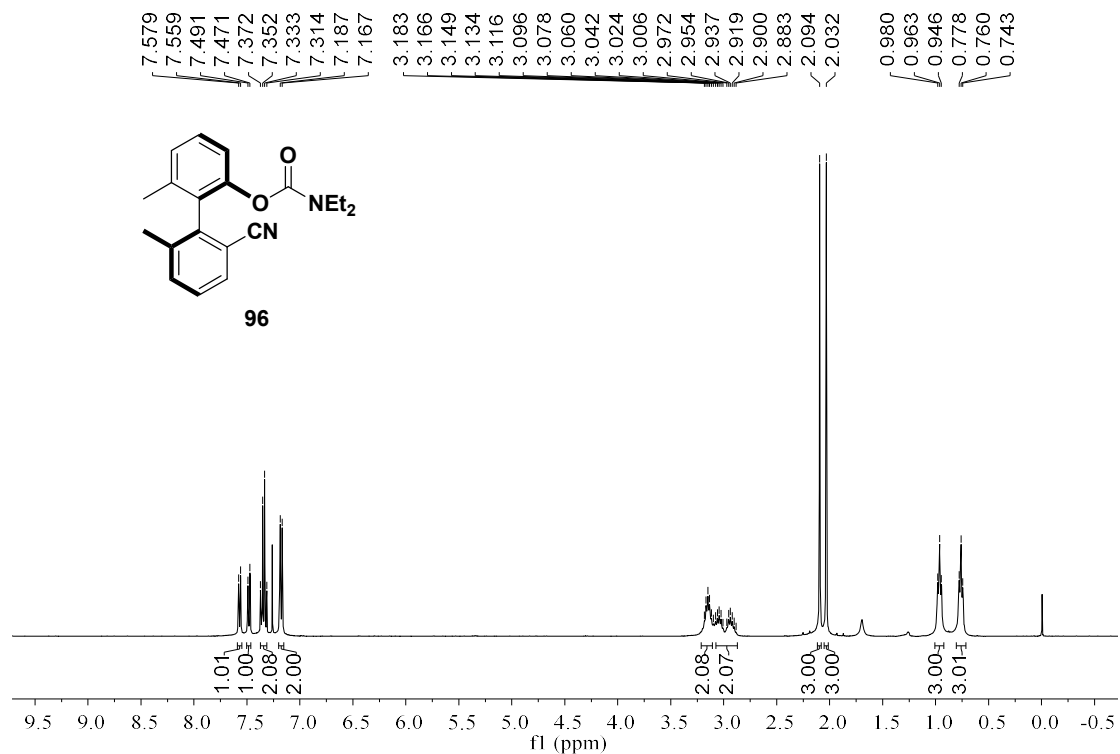

Figure S192. <sup>1</sup>H NMR Spectrum of **96**

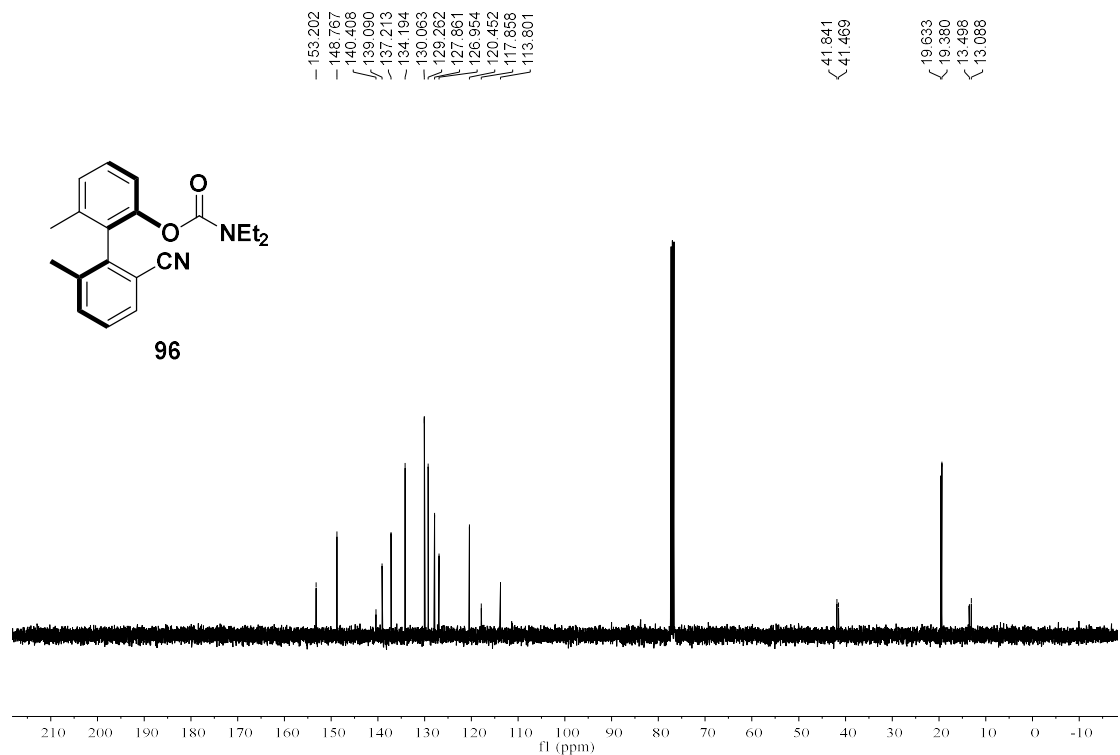

Figure S193. <sup>13</sup>C NMR Spectrum of **96**

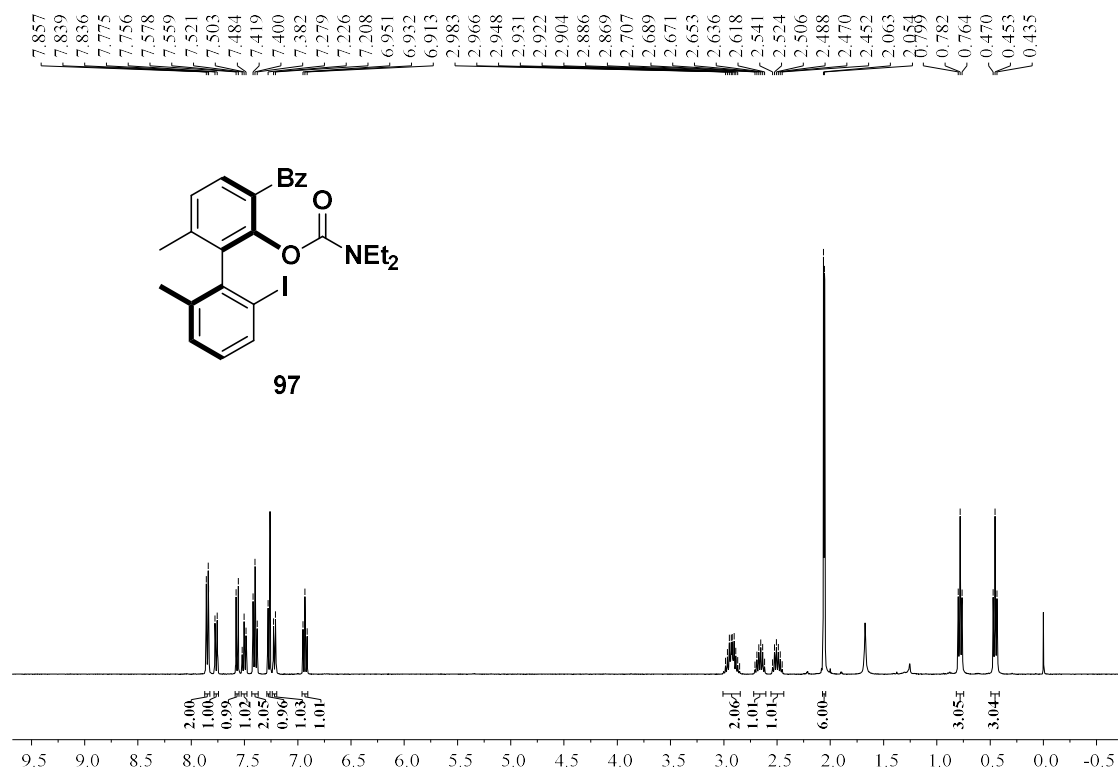

Figure S194. <sup>1</sup>H NMR Spectrum of **97**

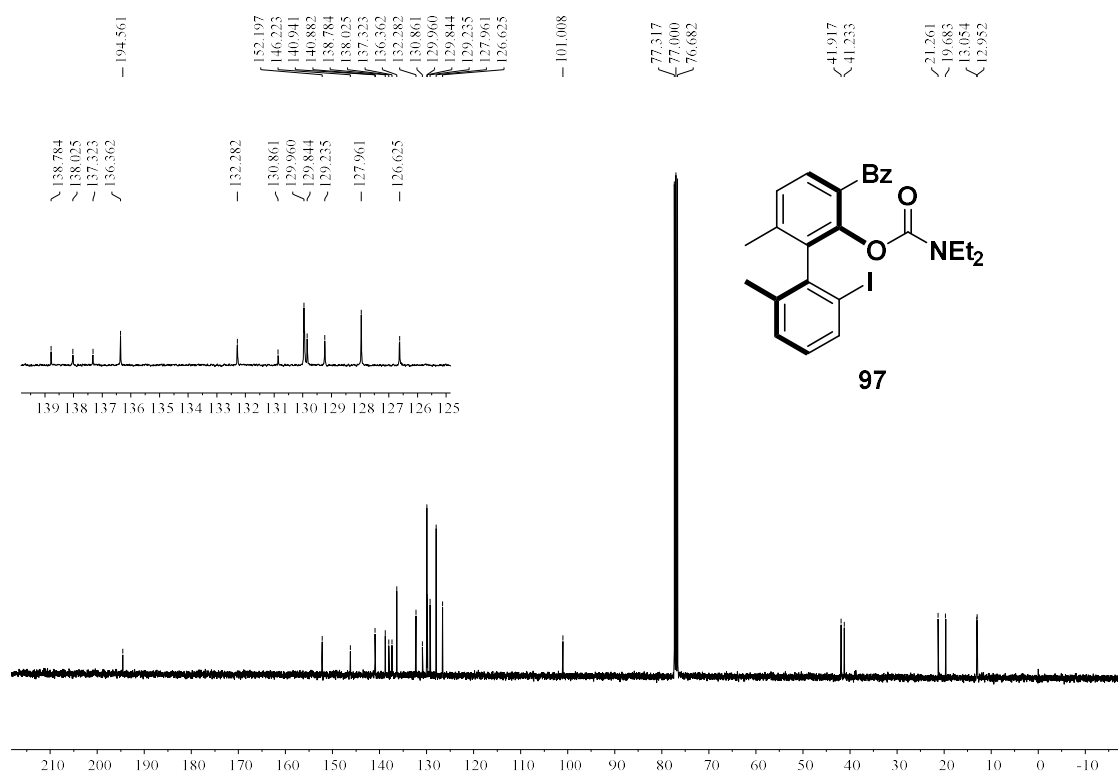

Figure S195. <sup>13</sup>C NMR Spectrum of **97**

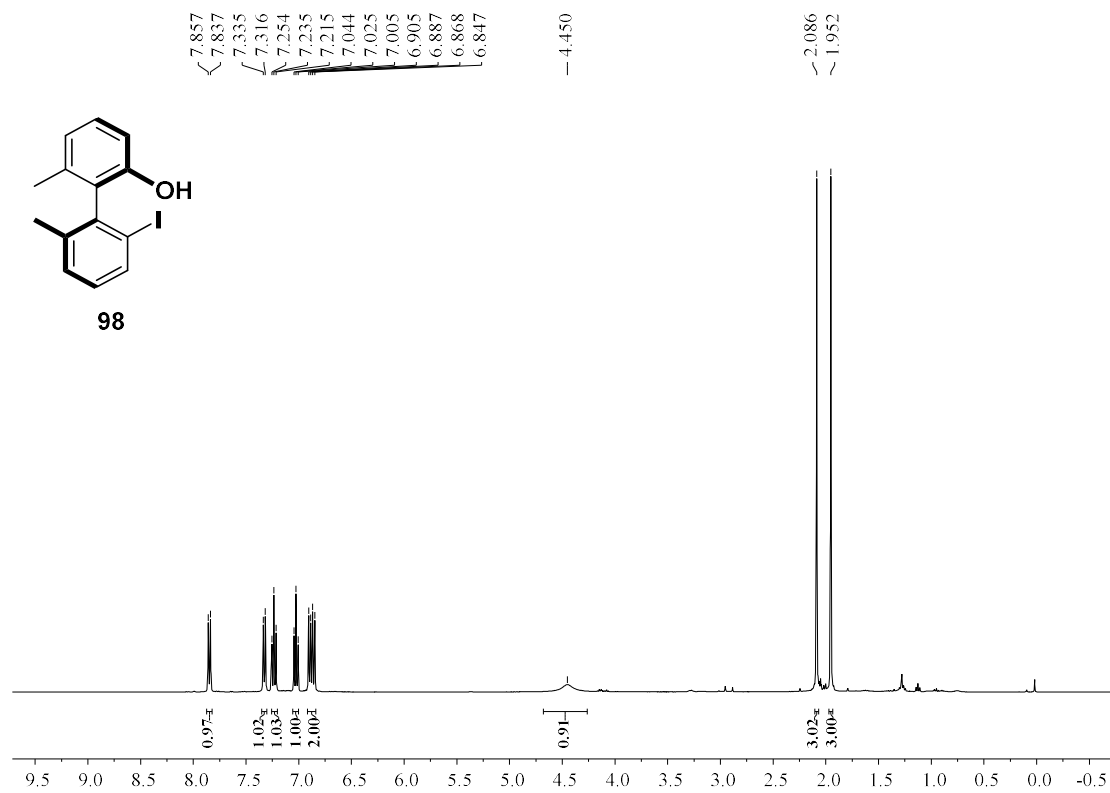

Figure S196. <sup>1</sup>H NMR Spectrum of **98**

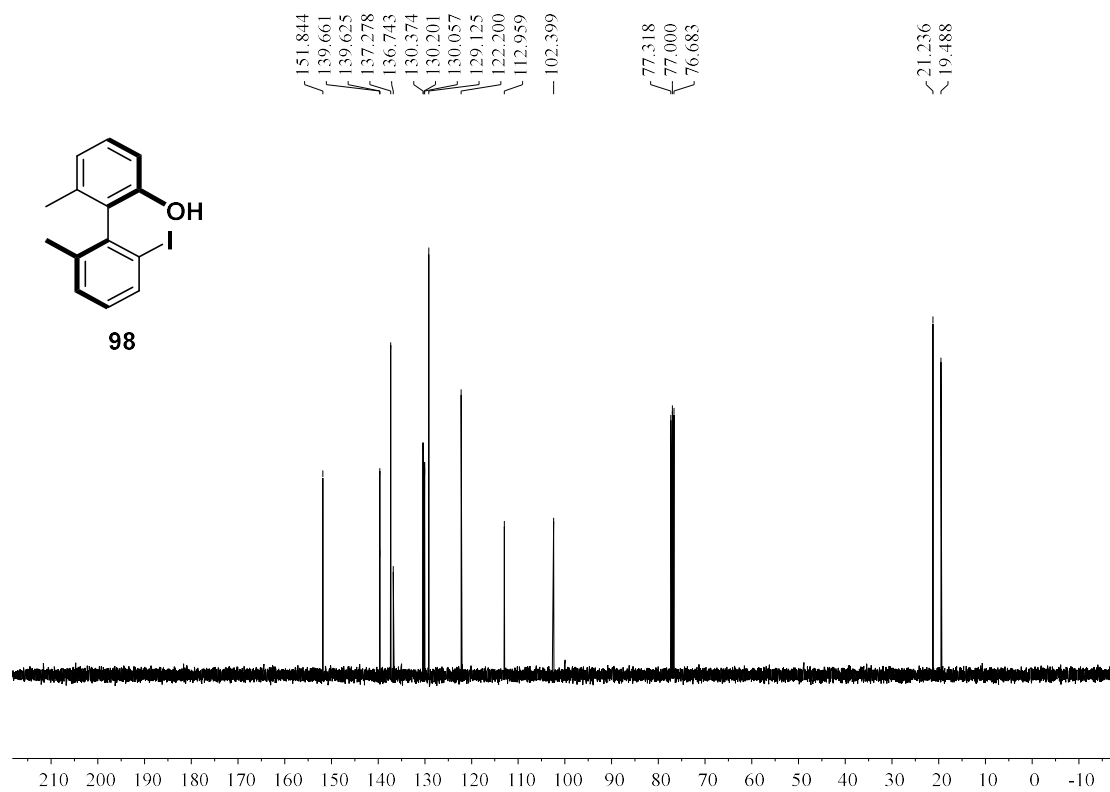

Figure S197. <sup>13</sup>C NMR Spectrum of **98**

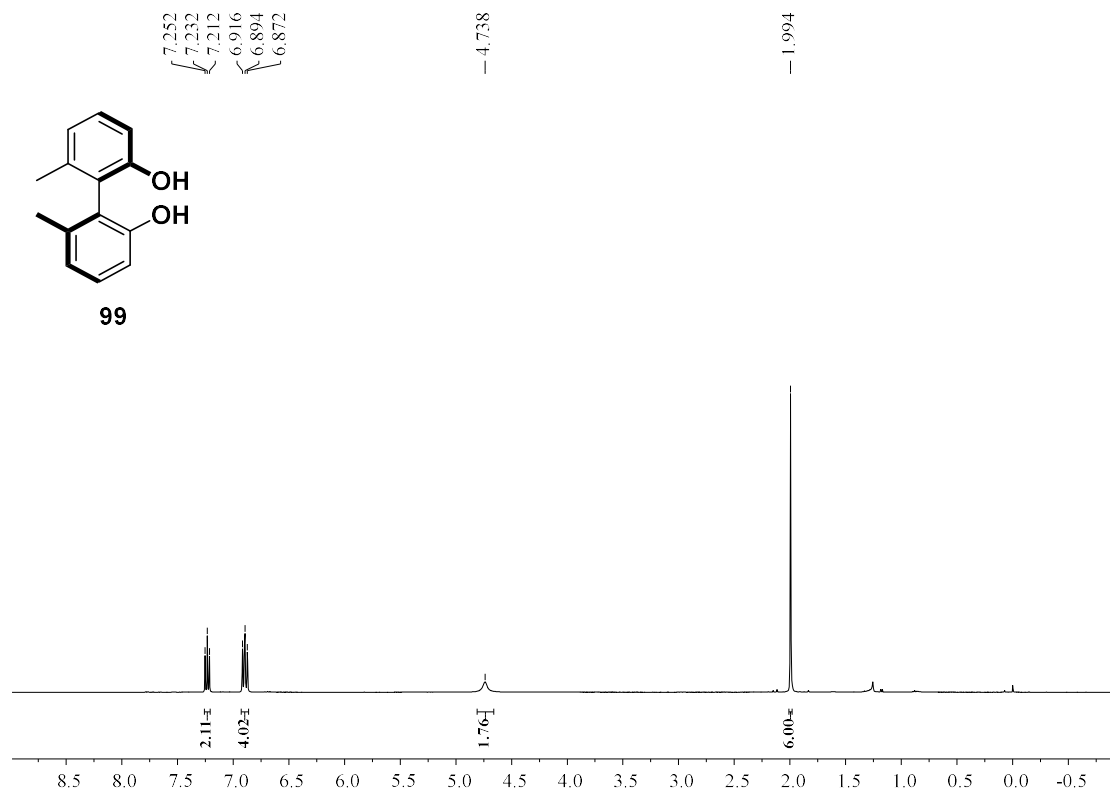

**Figure S198.** <sup>1</sup>H NMR Spectrum of **99**

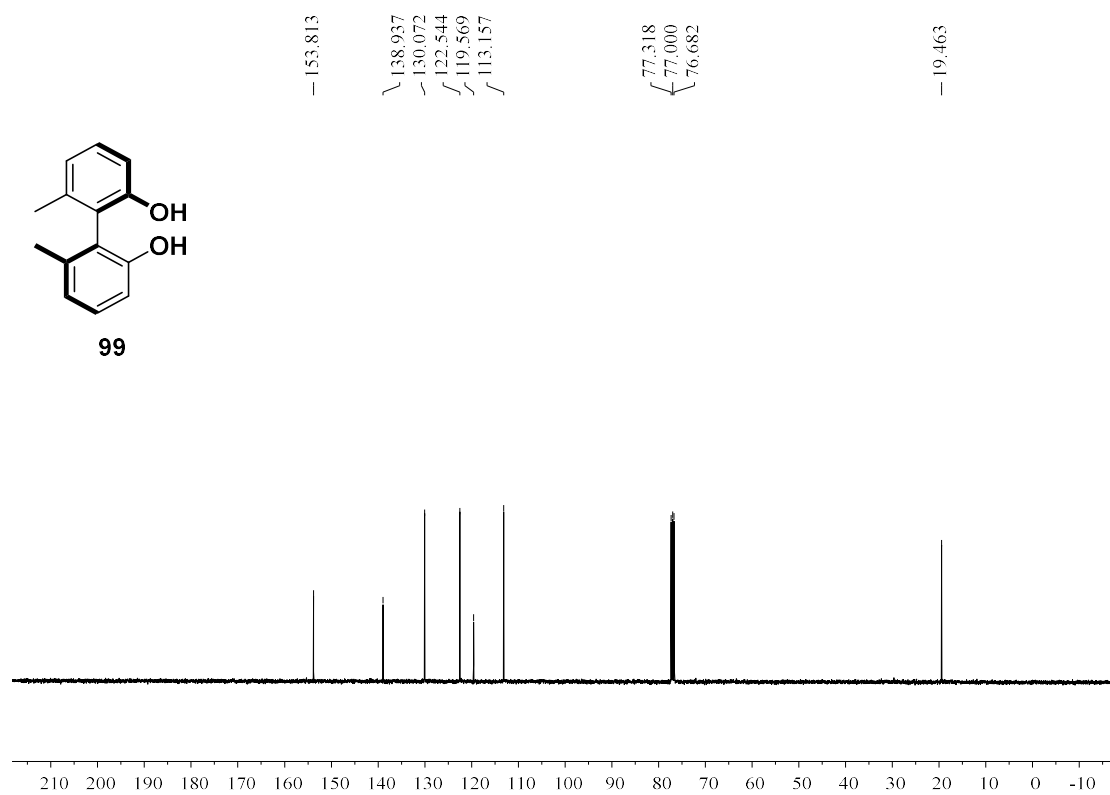

**Figure S199.** <sup>13</sup>C NMR Spectrum of **99**



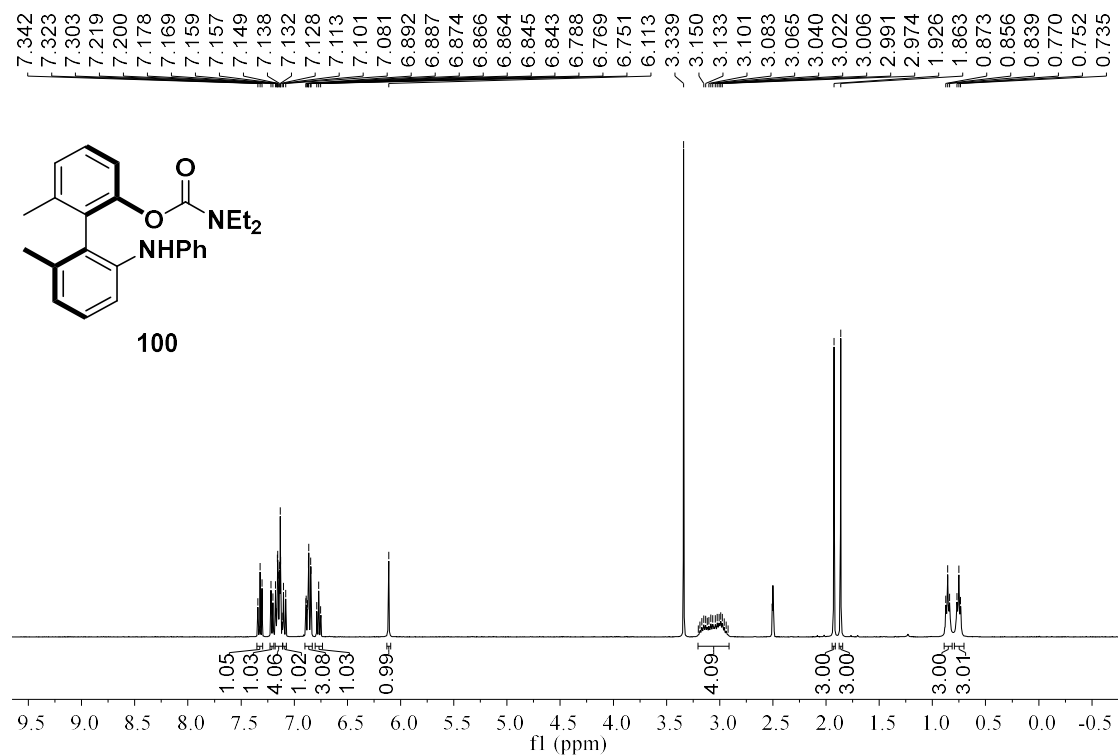

Figure S200. <sup>1</sup>H NMR Spectrum of **100**

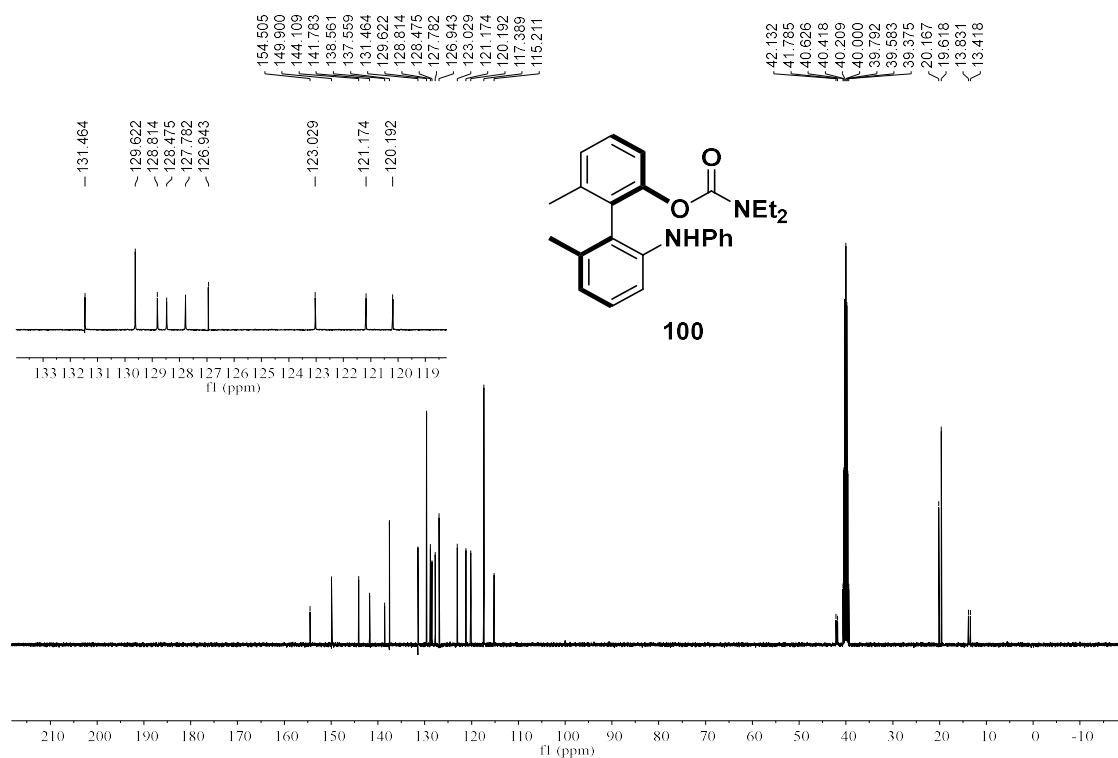

Figure S201. <sup>13</sup>C NMR Spectrum of **100**

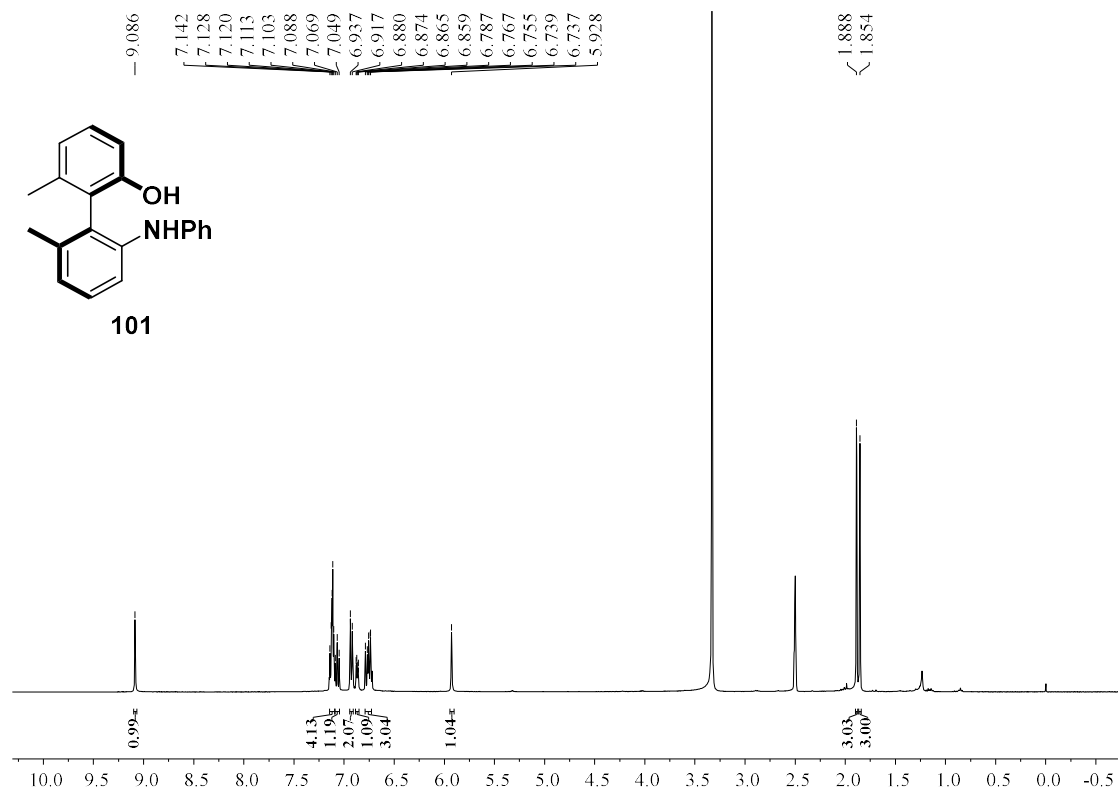

Figure S202. <sup>1</sup>H NMR Spectrum of **101**

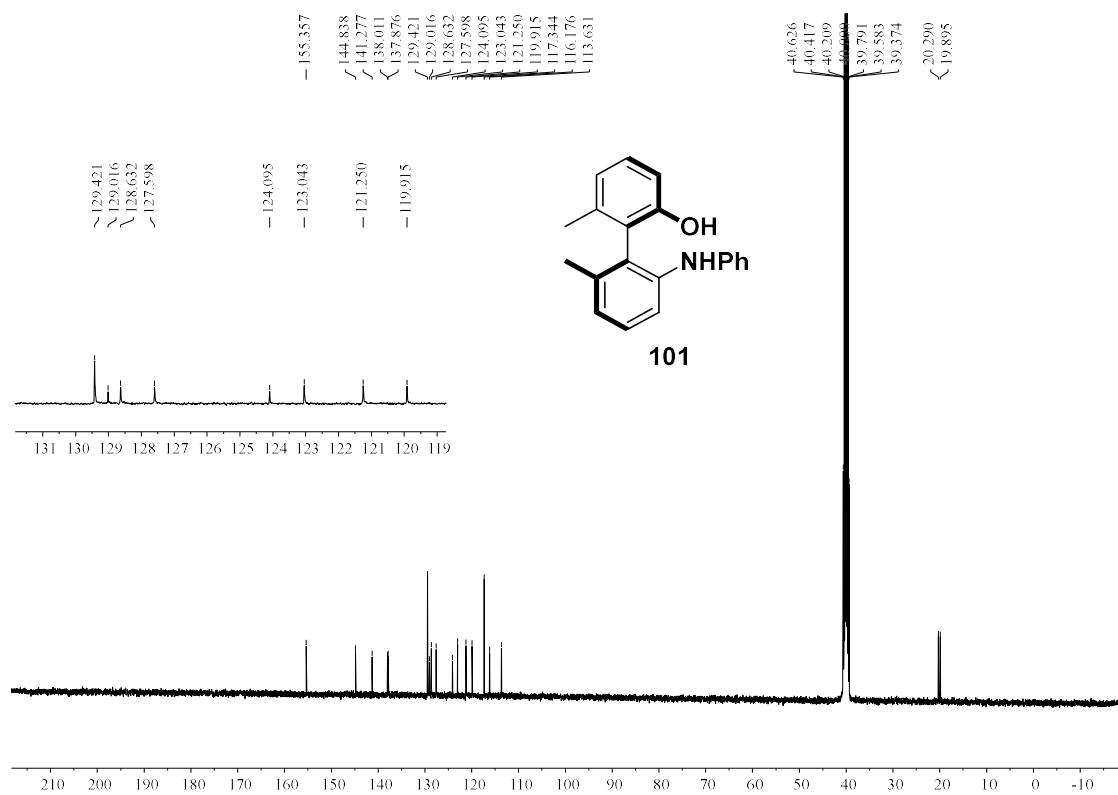

Figure S203. <sup>13</sup>C NMR Spectrum of **101**

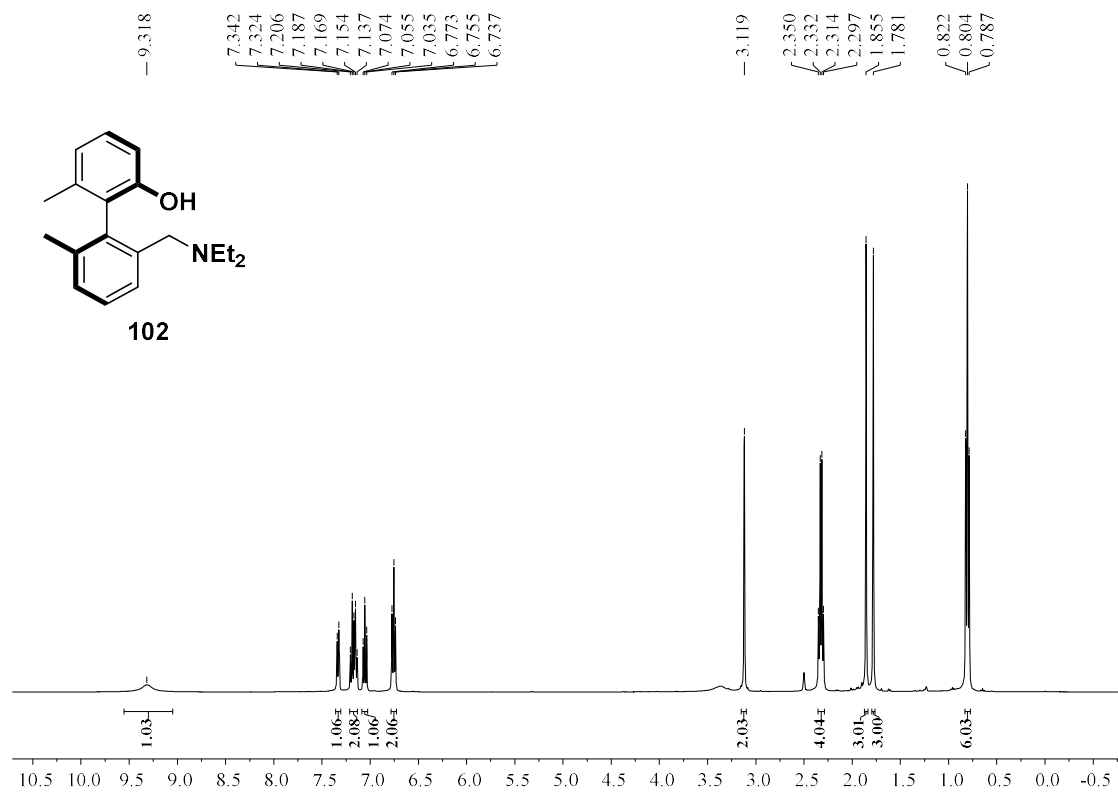

**Figure S204.**  $^1\text{H}$  NMR Spectrum of **102**

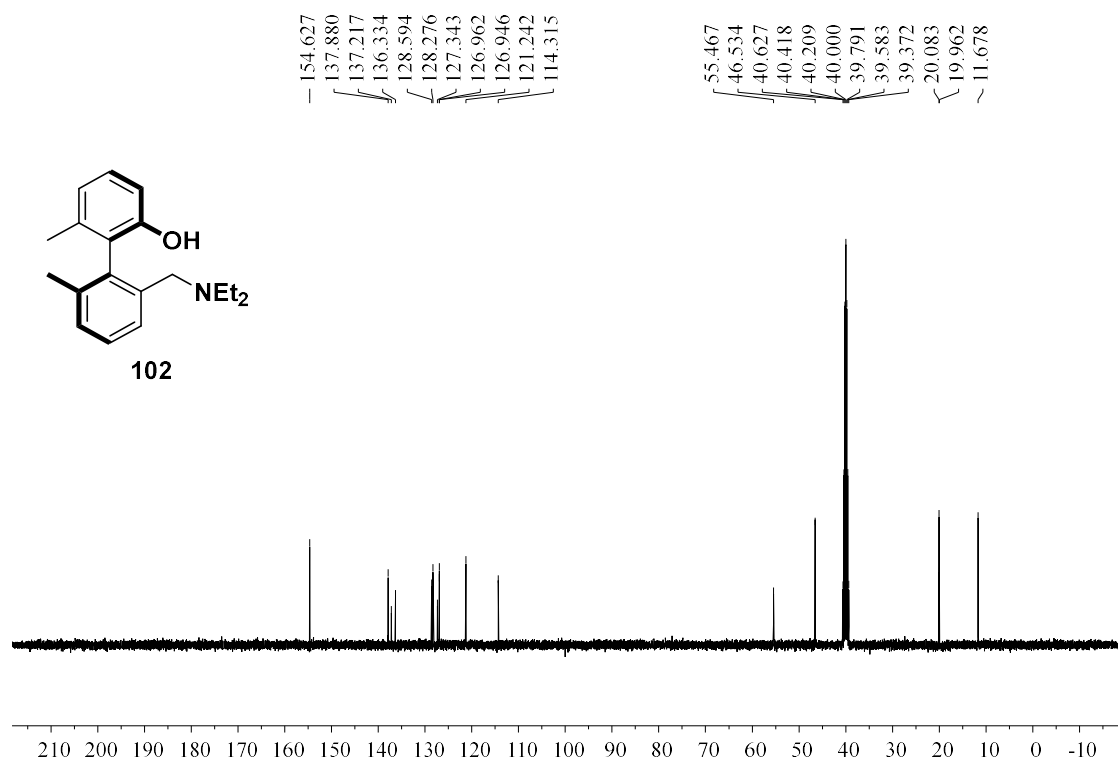

**Figure S205.**  $^{13}\text{C}$  NMR Spectrum of **102**

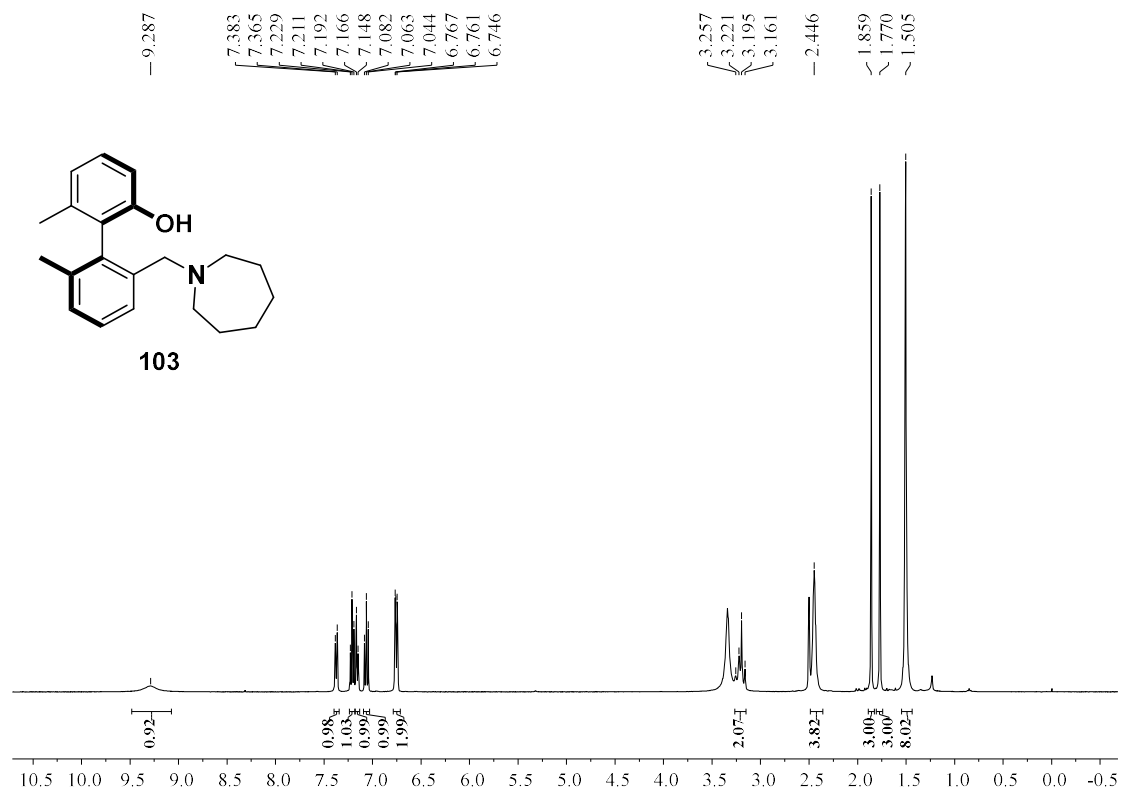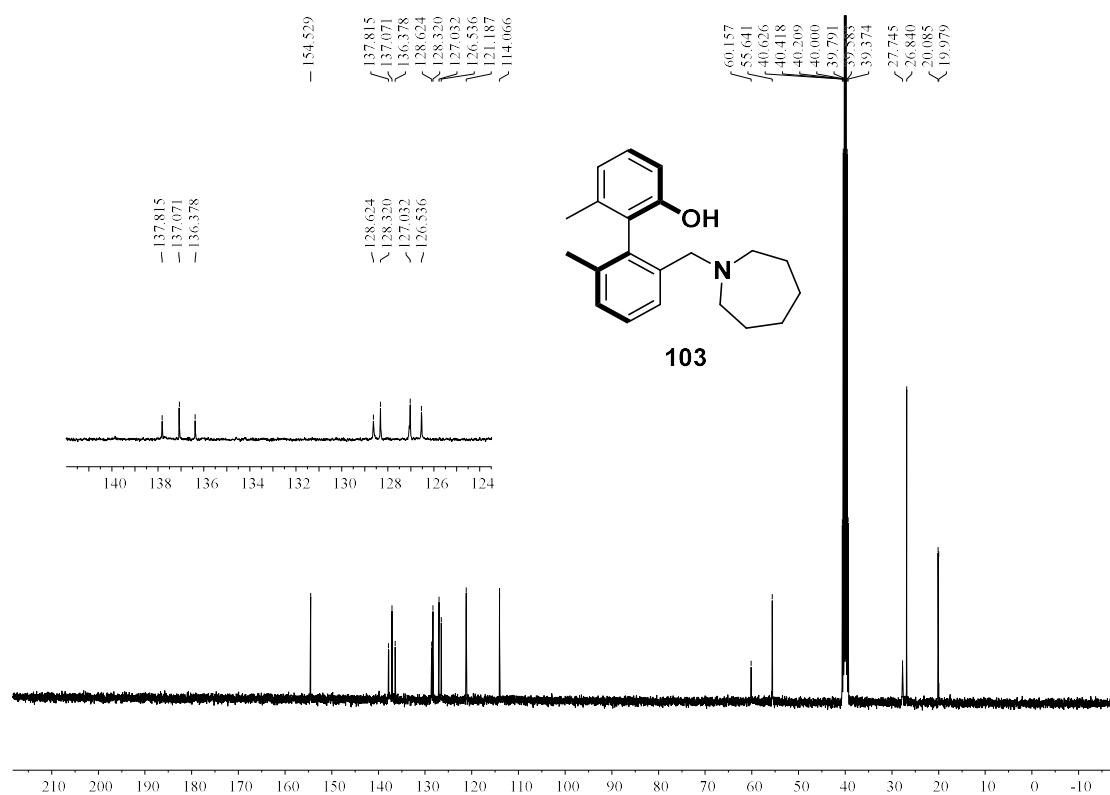

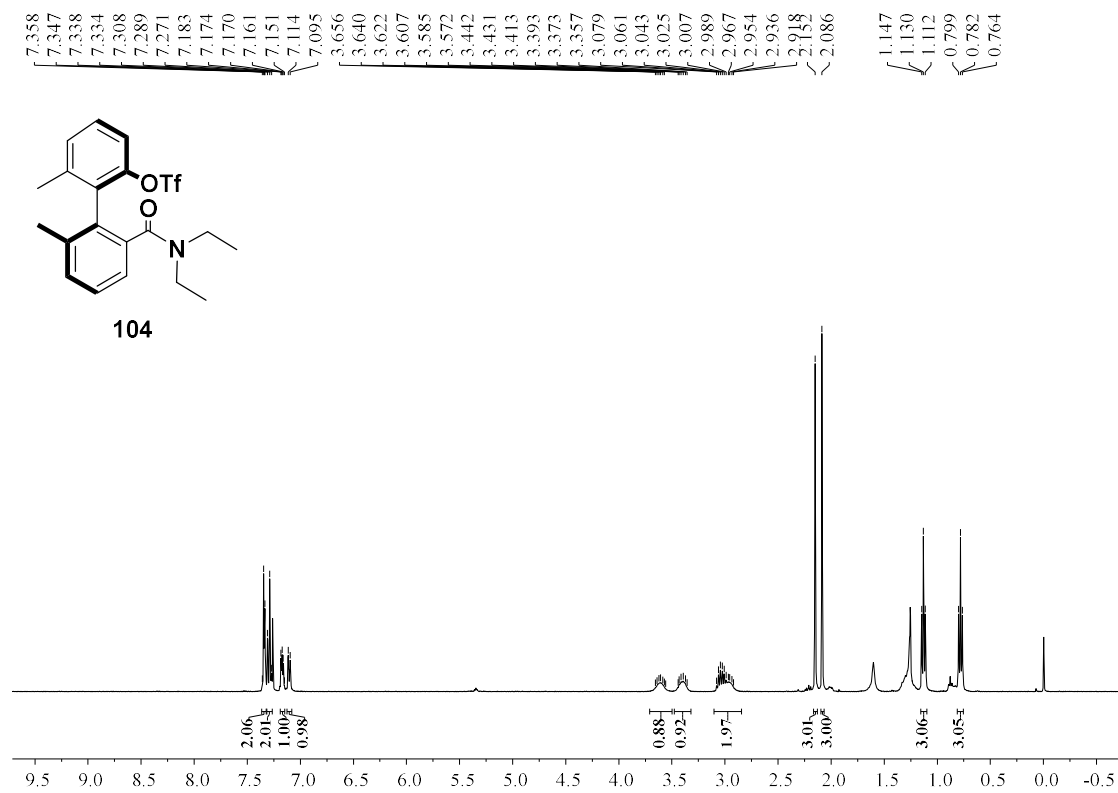

Figure S208. <sup>1</sup>H NMR Spectrum of **104**

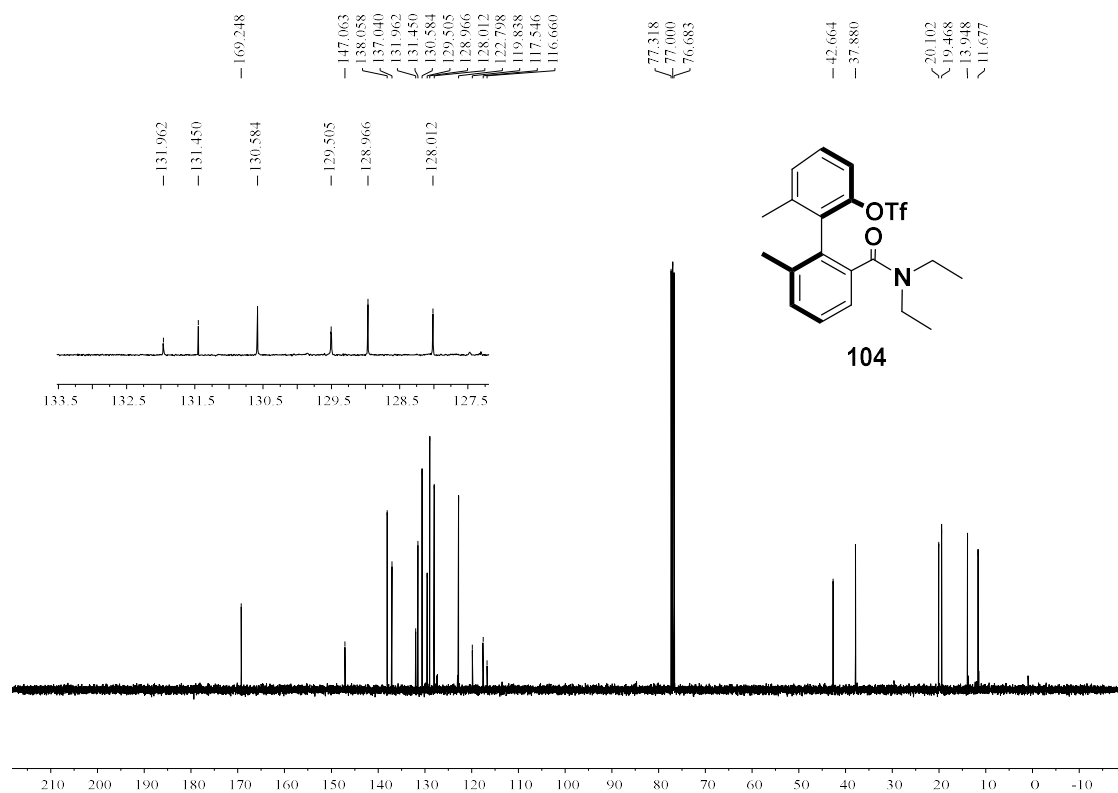

Figure S209. <sup>13</sup>C NMR Spectrum of **104**

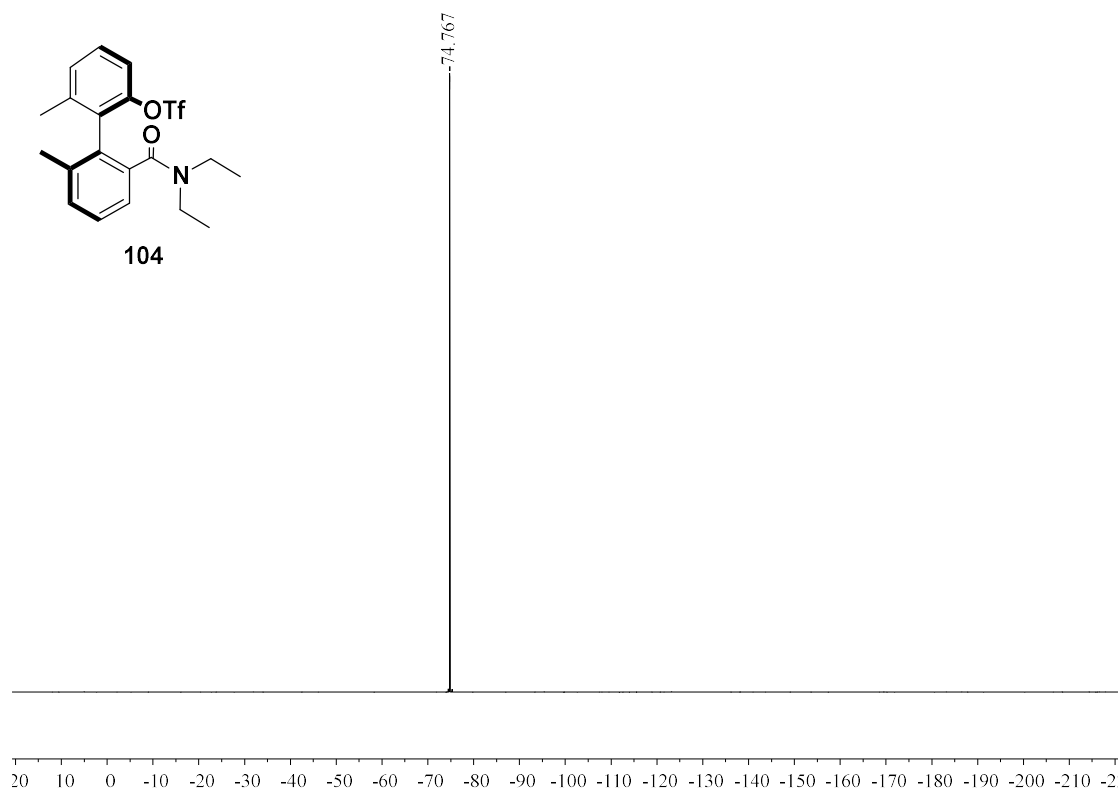

**Figure S210.** <sup>19</sup>F NMR Spectrum of **104**

## K. Copies of HPLC traces

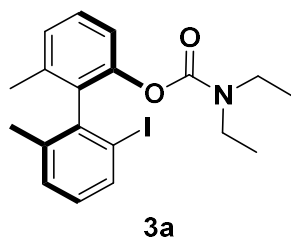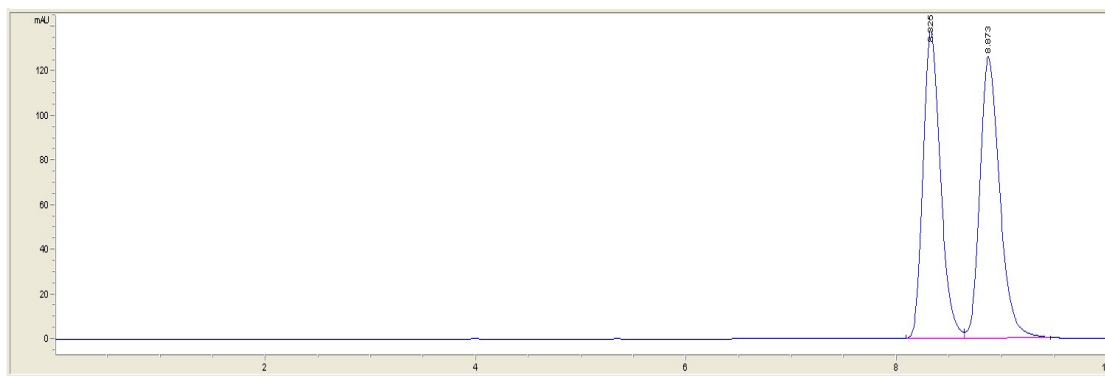

| Peak # | RetTime [min] | Area [mAU*s] | Height [mAU] | Width [min] | Symmetry [%] | Area [%] |
|--------|---------------|--------------|--------------|-------------|--------------|----------|
| 1      | 8.325         | 1593.8       | 138.2        | 0.1765      | 0.747        | 49.112   |
| 2      | 8.873         | 1651.5       | 126.1        | 0.2008      | 0.706        | 50.888   |

**Figure S211. HPLC Spectra of racemic 3a**

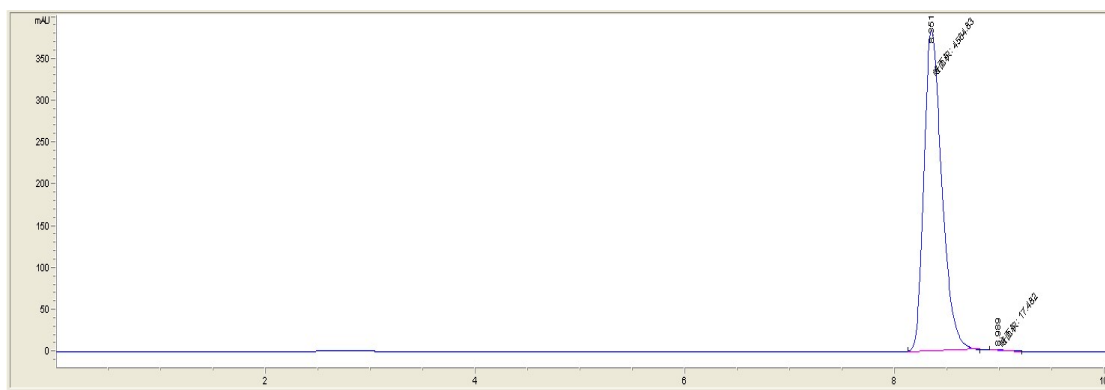

| Peak # | RetTime [min] | Area [mAU*s] | Height [mAU] | Width [min] | Symmetry [%] | Area [%] |
|--------|---------------|--------------|--------------|-------------|--------------|----------|
| 1      | 8.351         | 4564.8       | 383.2        | 0.1985      | 0.7          | 99.618   |
| 2      | 8.989         | 17.5         | 1.4          | 0.2154      | 0.265        | 0.382    |

**Figure S212. HPLC Spectra of 3a**

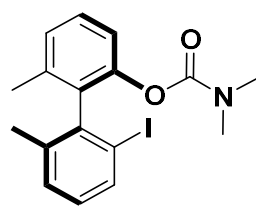

4

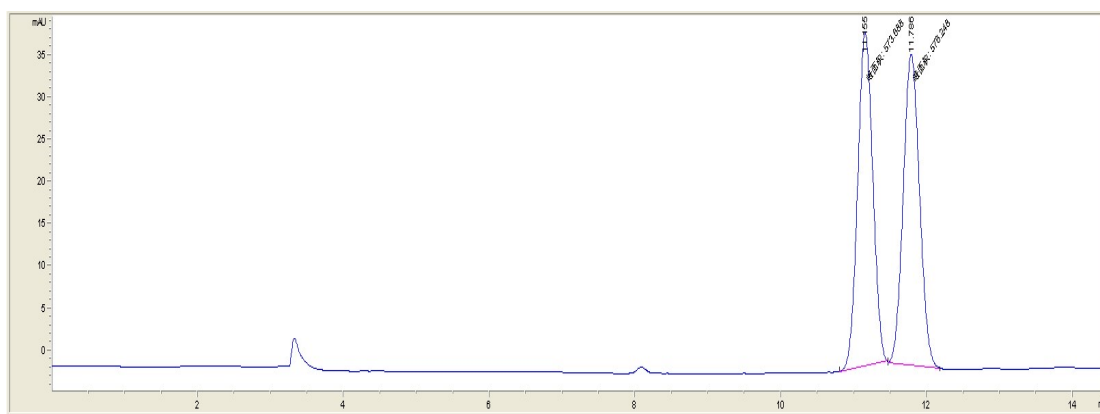

| Peak # | RetTime [min] | Area [mAU*s] | Height [mAU] | Width [min] | Symmetry [%] | Area [%] |
|--------|---------------|--------------|--------------|-------------|--------------|----------|
| 1      | 11.155        | 573.7        | 39.5         | 0.2419      | 0.964        | 49.889   |
| 2      | 11.786        | 576.2        | 36.9         | 0.2604      | 0.909        | 50.111   |

Figure S213. HPLC Spectra of racemic 4

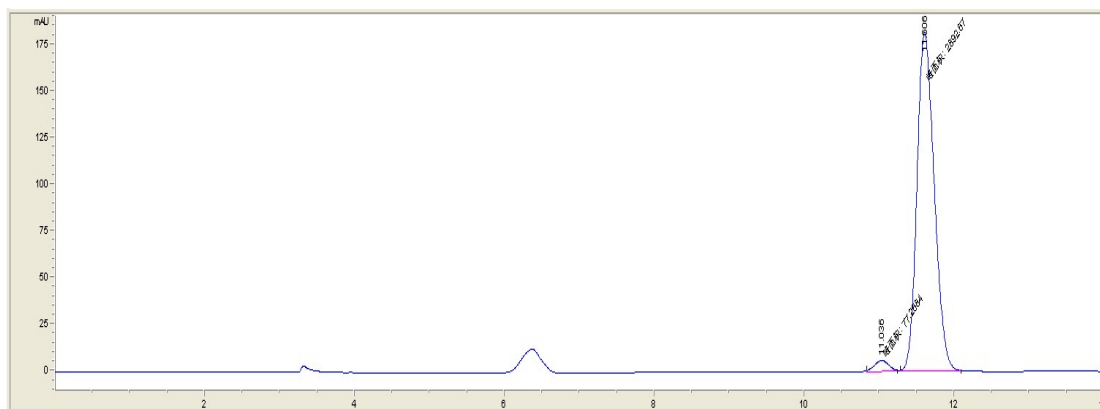

| Peak # | RetTime [min] | Area [mAU*s] | Height [mAU] | Width [min] | Symmetry [%] | Area [%] |
|--------|---------------|--------------|--------------|-------------|--------------|----------|
| 1      | 11.036        | 77.3         | 5.8          | 0.2224      | 1.085        | 2.602    |
| 2      | 11.606        | 2892.7       | 181.5        | 0.2657      | 0.757        | 97.398   |

Figure S214. HPLC Spectra of 4



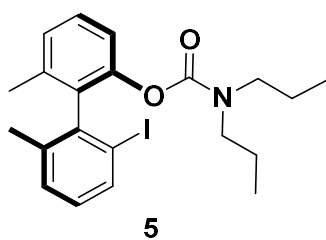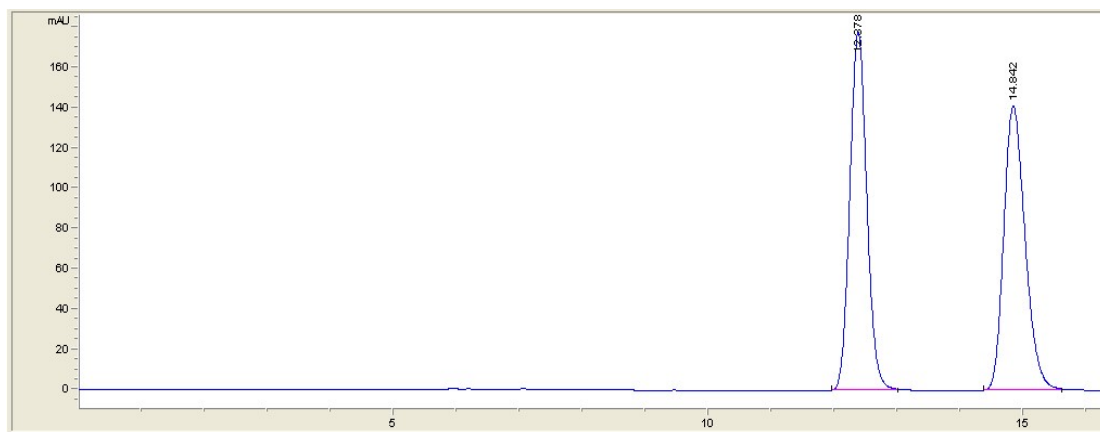

| Peak # | RetTime [min] | Area [mAU*s] | Height [mAU] | Width [min] | Symmetry | Area [%] |
|--------|---------------|--------------|--------------|-------------|----------|----------|
| 1      | 12.378        | 3337.6       | 177.8        | 0.291       | 0.915    | 50.142   |
| 2      | 14.842        | 3318.7       | 141.1        | 0.3625      | 0.755    | 49.858   |

**Figure S215.** HPLC Spectra of racemic **5**

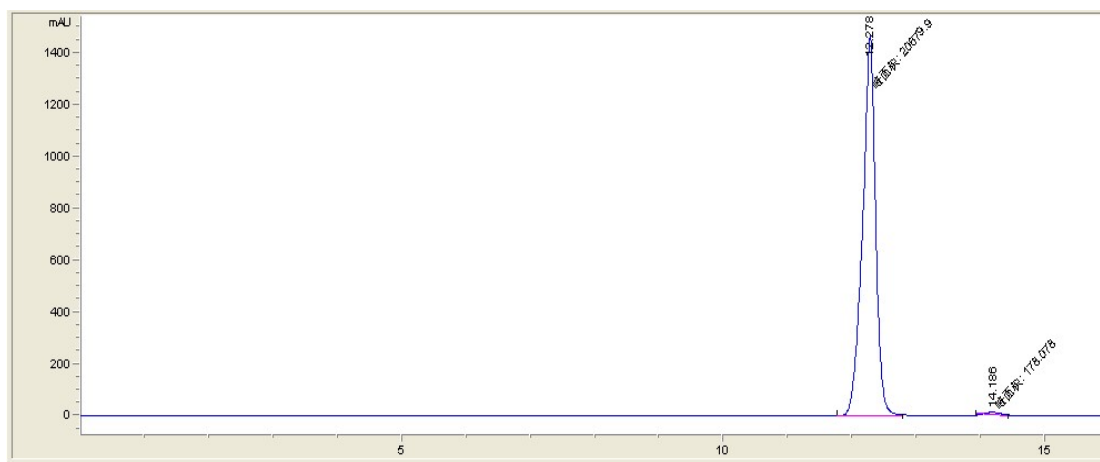

| Peak # | RetTime [min] | Area [mAU*s] | Height [mAU] | Width [min] | Symmetry | Area [%] |
|--------|---------------|--------------|--------------|-------------|----------|----------|
| 1      | 12.278        | 20679.9      | 1471.2       | 0.2343      | 1.33     | 99.146   |
| 2      | 14.186        | 178.1        | 10.7         | 0.2778      | 0.624    | 0.854    |

**Figure S216.** HPLC Spectra of **5**

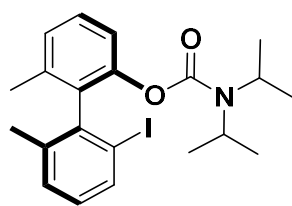

6

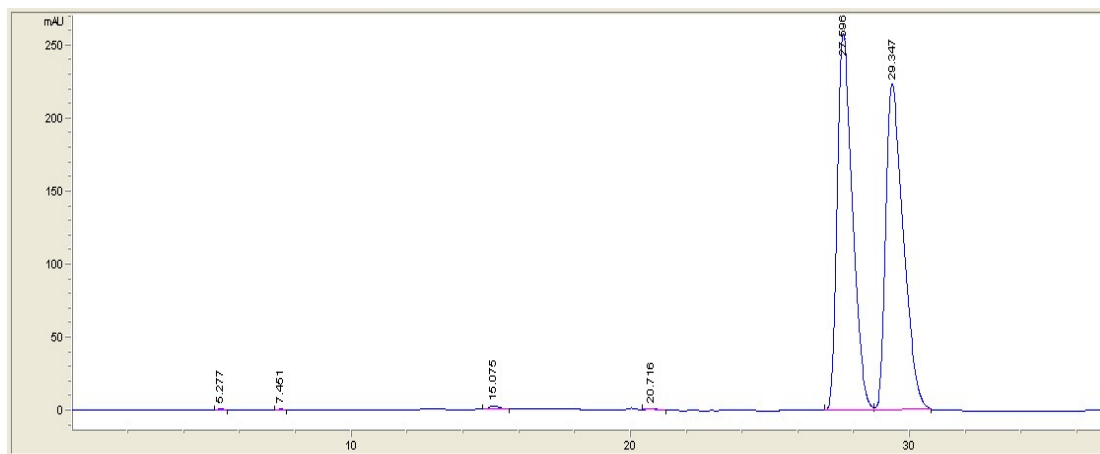

| Peak # | RetTime [min] | Area [mAU*s] | Height [mAU] | Width [min] | Symmetry [%] | Area [%] |
|--------|---------------|--------------|--------------|-------------|--------------|----------|
| 1      | 27.596        | 9783.3       | 257.8        | 0.5828      | 0.579        | 50.009   |
| 2      | 29.347        | 9779.7       | 223.1        | 0.6634      | 0.504        | 49.991   |

Figure S217. HPLC Spectra of racemic 6

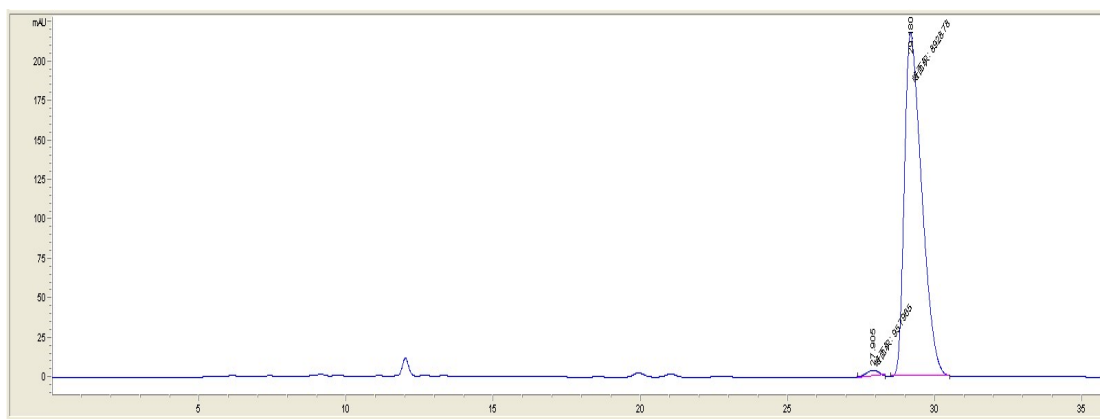

| Peak # | RetTime [min] | Area [mAU*s] | Height [mAU] | Width [min] | Symmetry [%] | Area [%] |
|--------|---------------|--------------|--------------|-------------|--------------|----------|
| 1      | 27.905        | 95.8         | 3.4          | 0.4645      | 1.571        | 1.062    |
| 2      | 29.18         | 8928.8       | 217.1        | 0.6895      | 0.542        | 98.938   |

Figure S218. HPLC Spectra of 6

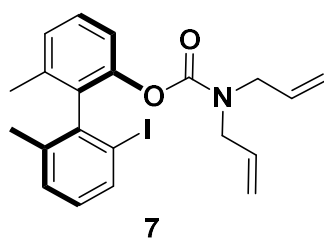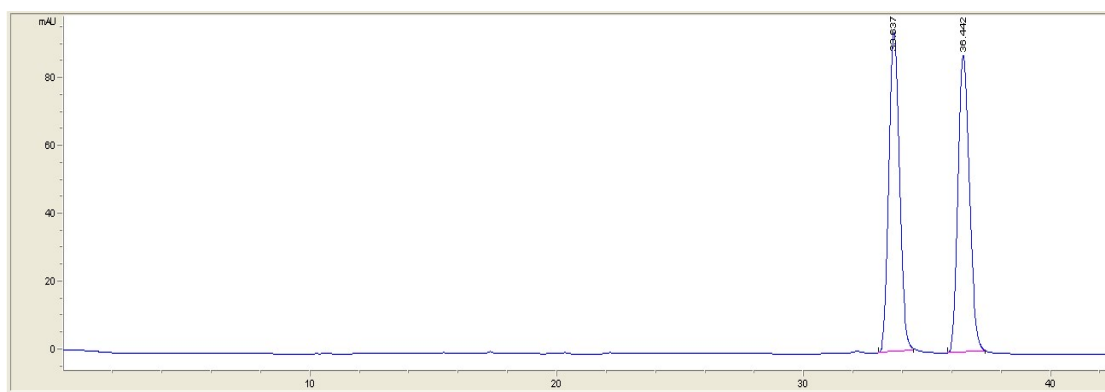

| Peak # | RetTime [min] | Area [mAU*s] | Height [mAU] | Width [min] | Symmetry | Area [%] |
|--------|---------------|--------------|--------------|-------------|----------|----------|
| 1      | 33.637        | 2775.7       | 94.2         | 0.4597      | 0.875    | 49.946   |
| 2      | 36.442        | 2781.6       | 87.5         | 0.495       | 0.784    | 50.054   |

**Figure S219.** HPLC Spectra of racemic **7**

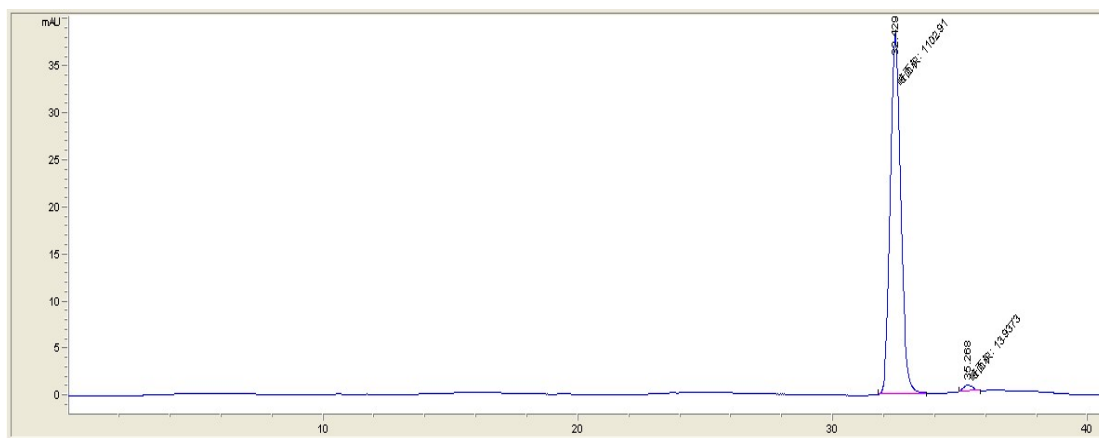

| Peak # | RetTime [min] | Area [mAU*s] | Height [mAU] | Width [min] | Symmetry | Area [%] |
|--------|---------------|--------------|--------------|-------------|----------|----------|
| 1      | 32.429        | 1102.9       | 38.2         | 0.4808      | 0.87     | 98.752   |
| 2      | 35.268        | 13.9         | 6E-1         | 0.3902      | 0.947    | 1.248    |

**Figure S220.** HPLC Spectra of **7**

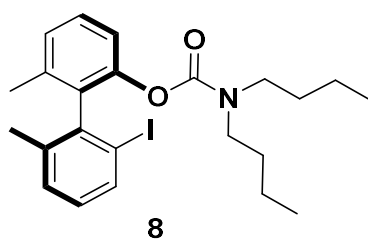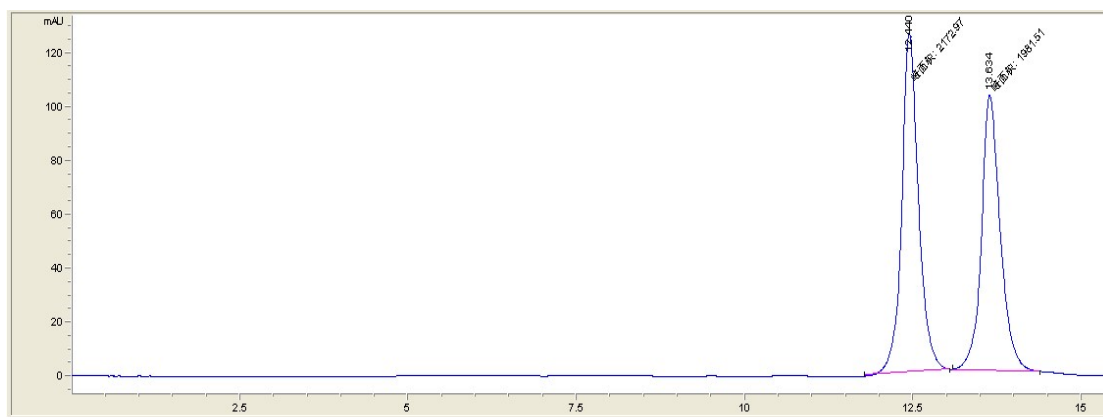

| Peak # | RetTime [min] | Area [mAU*s] | Height [mAU] | Width [min] | Symmetry [%] | Area [%] |
|--------|---------------|--------------|--------------|-------------|--------------|----------|
| 1      | 12.44         | 2173         | 126.1        | 0.2871      | 0.8          | 52.304   |
| 2      | 13.634        | 1981.5       | 102.2        | 0.323       | 0.755        | 47.696   |

**Figure S221.** HPLC Spectra of racemic **8**

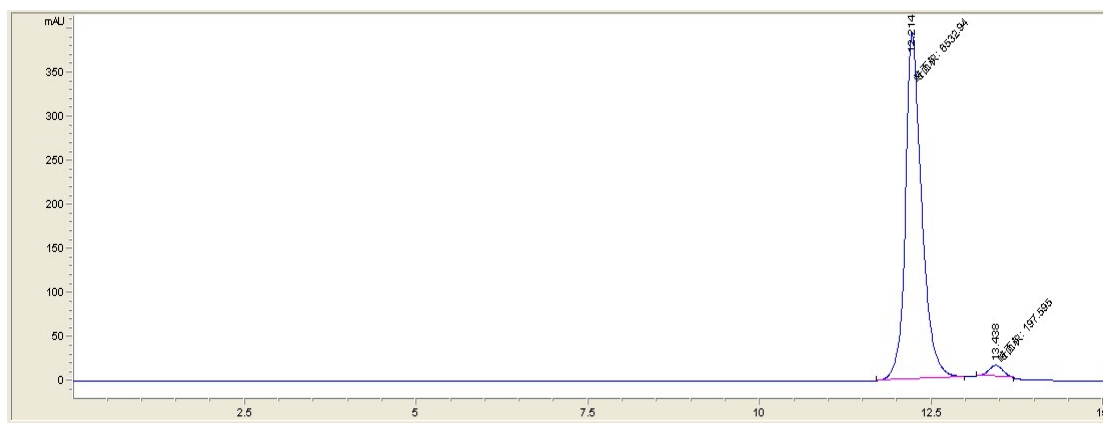

| Peak # | RetTime [min] | Area [mAU*s] | Height [mAU] | Width [min] | Symmetry [%] | Area [%] |
|--------|---------------|--------------|--------------|-------------|--------------|----------|
| 1      | 12.214        | 6532.9       | 394          | 0.2763      | 0.647        | 97.064   |
| 2      | 13.438        | 197.6        | 13.3         | 0.2481      | 0.995        | 2.936    |

**Figure S222.** HPLC Spectra of **8**

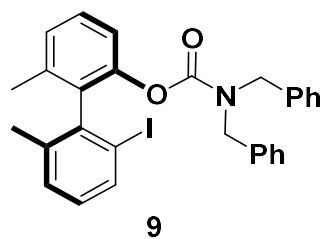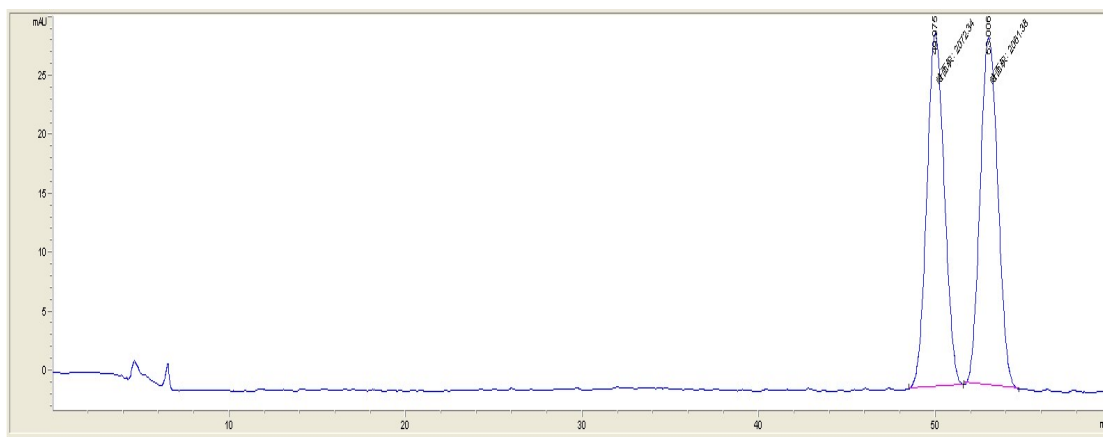

| Peak # | RetTime [min] | Area [mAU*s] | Height [mAU] | Width [min] | Symmetry | Area [%] |
|--------|---------------|--------------|--------------|-------------|----------|----------|
| 1      | 49.975        | 2072.3       | 30           | 1.1506      | 0.911    | 50.133   |
| 2      | 53.006        | 2061.4       | 29.6         | 1.1625      | 0.903    | 49.867   |

**Figure S223.** HPLC Spectra of racemic **9**

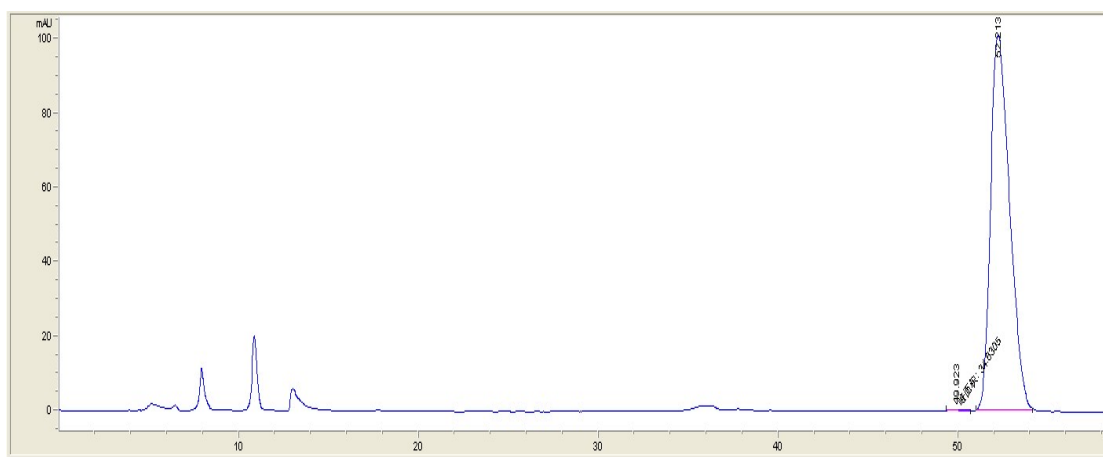

| Peak # | RetTime [min] | Area [mAU*s] | Height [mAU] | Width [min] | Symmetry | Area [%] |
|--------|---------------|--------------|--------------|-------------|----------|----------|
| 1      | 49.923        | 34.6         | 5.5E-1       | 1.0442      | 0.557    | 0.465    |
| 2      | 52.213        | 7412.7       | 100.8        | 1.1022      | 0.615    | 99.535   |

**Figure S224.** HPLC Spectra of **9**

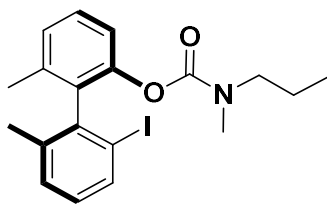

10

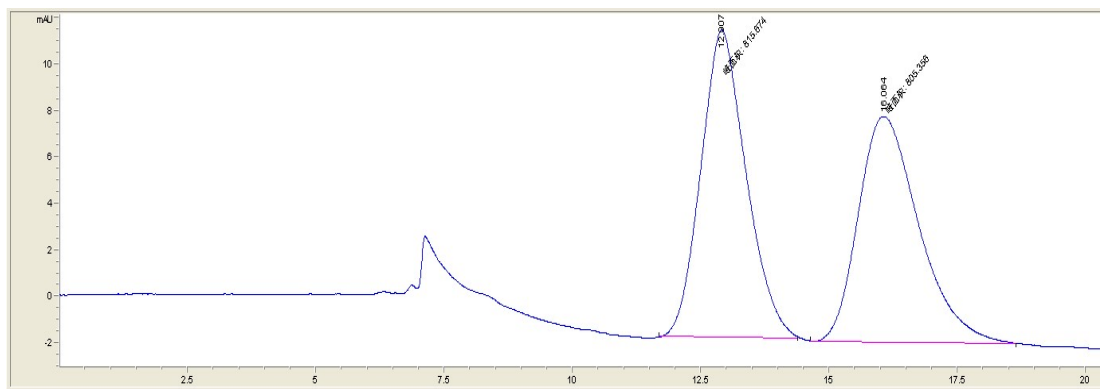

| Peak # | RetTime [min] | Area [mAU*s] | Height [mAU] | Width [min] | Symmetry | Area [%] |
|--------|---------------|--------------|--------------|-------------|----------|----------|
| 1      | 12.907        | 815.7        | 13.3         | 1.0246      | 0.836    | 50.318   |
| 2      | 16.064        | 805.4        | 9.8          | 1.3754      | 0.694    | 49.682   |

Figure S225. HPLC Spectra of racemic 10

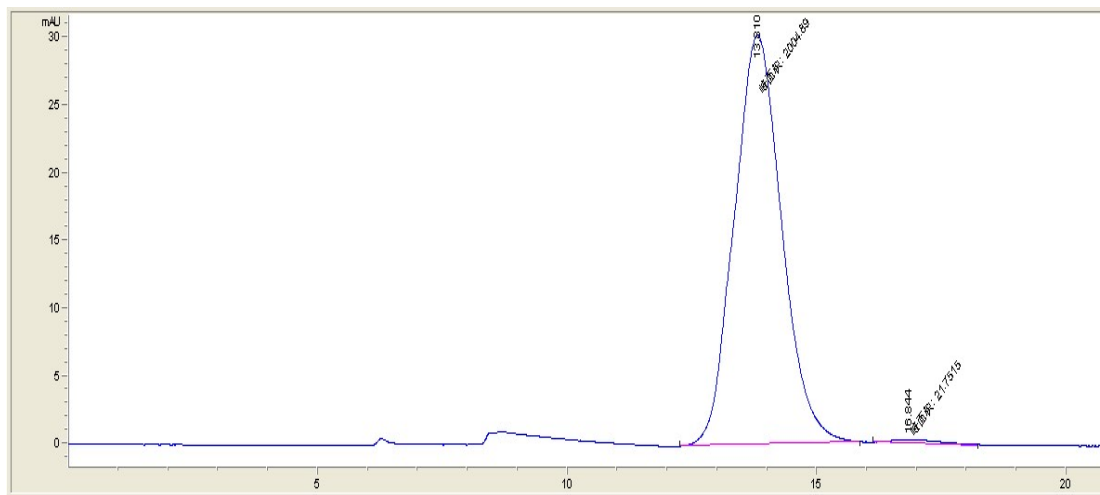

| Peak # | RetTime [min] | Area [mAU*s] | Height [mAU] | Width [min] | Symmetry | Area [%] |
|--------|---------------|--------------|--------------|-------------|----------|----------|
| 1      | 13.81         | 2004.9       | 30.2         | 1.1054      | 0.925    | 98.927   |
| 2      | 16.844        | 21.8         | 3E-1         | 1.2074      | 0.508    | 1.073    |

Figure S226. HPLC Spectra of 10

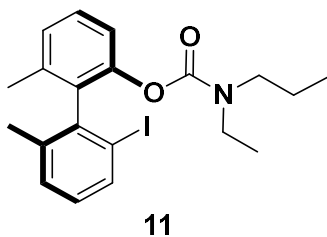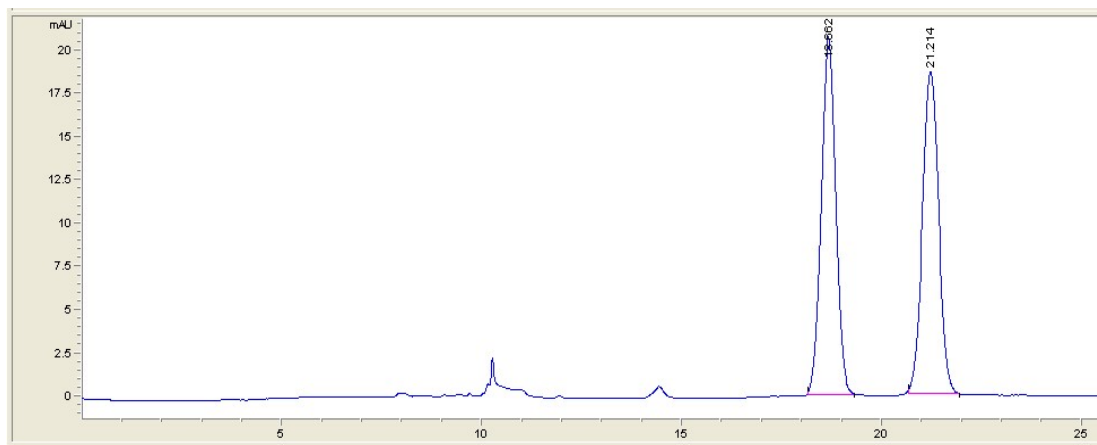

| Peak # | RetTime [min] | Area [mAU*s] | Height [mAU] | Width [min] | Symmetry | Area [%] |
|--------|---------------|--------------|--------------|-------------|----------|----------|
| 1      | 18.662        | 524.6        | 20.7         | 0.3934      | 0.981    | 50.199   |
| 2      | 21.214        | 520.4        | 18.6         | 0.4348      | 0.968    | 49.801   |

**Figure S227. HPLC Spectra of racemic 11**

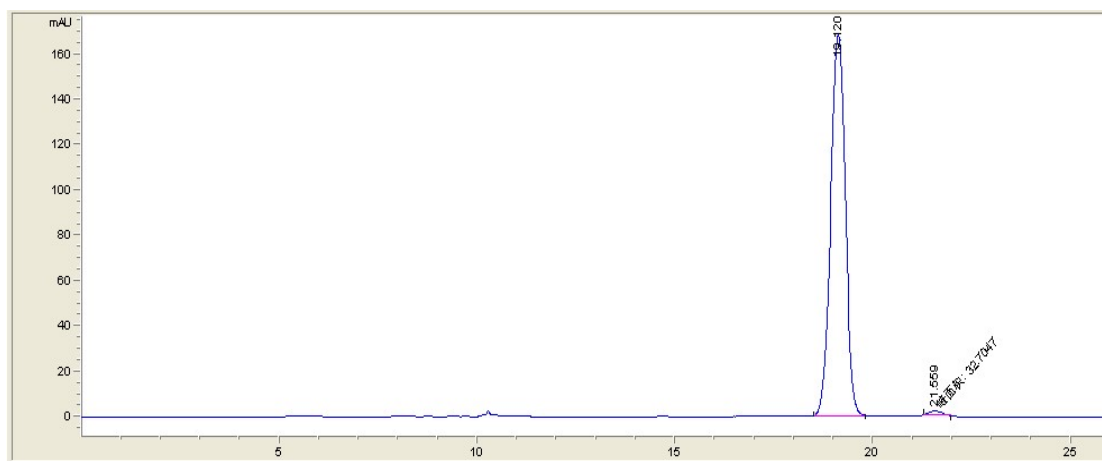

| Peak # | RetTime [min] | Area [mAU*s] | Height [mAU] | Width [min] | Symmetry | Area [%] |
|--------|---------------|--------------|--------------|-------------|----------|----------|
| 1      | 19.12         | 4302.8       | 168.2        | 0.4004      | 1.062    | 99.246   |
| 2      | 21.559        | 32.7         | 1.6          | 0.3388      | 0.989    | 0.754    |

**Figure S228. HPLC Spectra of 11**

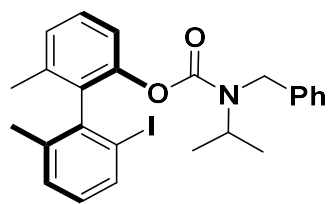

12

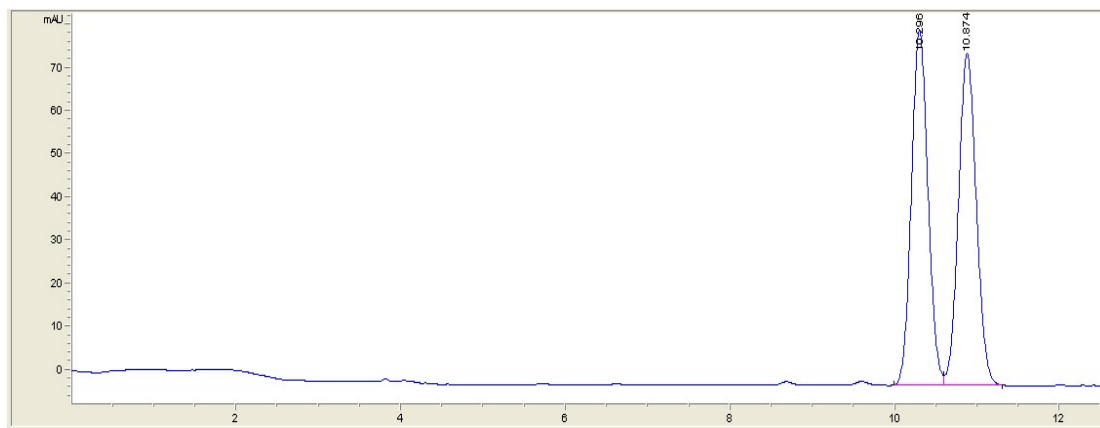

| Peak # | RetTime [min] | Area [mAU*s] | Height [mAU] | Width [min] | Symmetry | Area [%] |
|--------|---------------|--------------|--------------|-------------|----------|----------|
| 1      | 10.296        | 1153.9       | 82.2         | 0.2178      | 0.901    | 49.836   |
| 2      | 10.874        | 1161.5       | 76.9         | 0.2342      | 0.895    | 50.164   |

Figure S229. HPLC Spectra of racemic 12

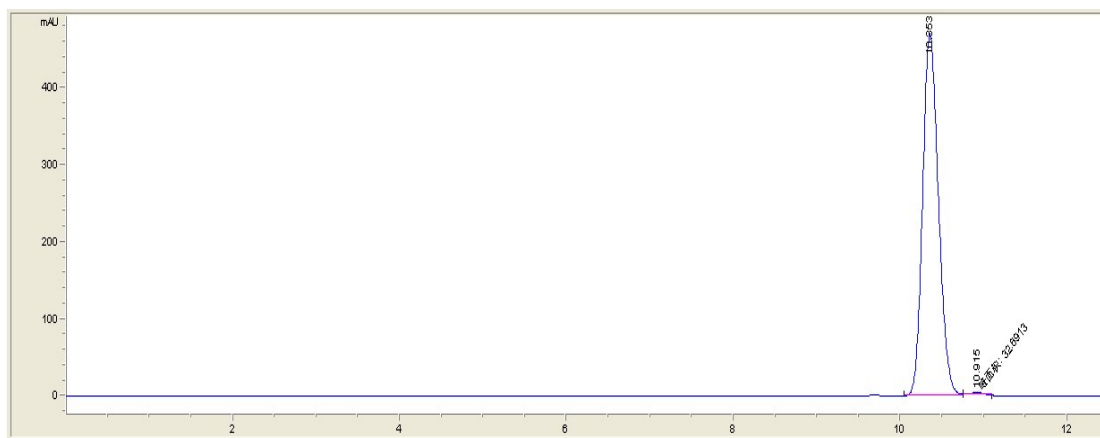

| Peak # | RetTime [min] | Area [mAU*s] | Height [mAU] | Width [min] | Symmetry | Area [%] |
|--------|---------------|--------------|--------------|-------------|----------|----------|
| 1      | 10.353        | 6201.1       | 470.3        | 0.2058      | 0.79     | 99.476   |
| 2      | 10.915        | 32.7         | 3            | 0.1834      | 1.124    | 0.524    |

Figure S230. HPLC Spectra of 12



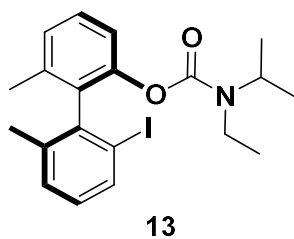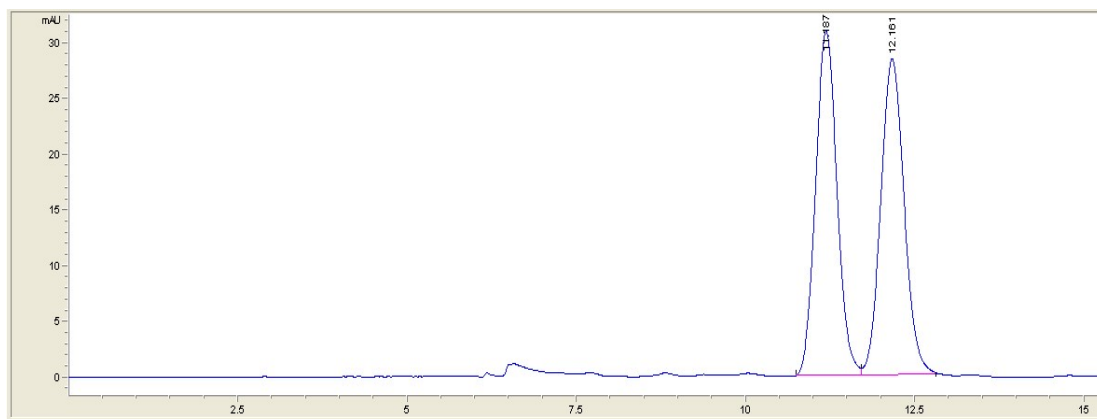

| Peak # | RetTime [min] | Area [mAU*s] | Height [mAU] | Width [min] | Symmetry | Area [%] |
|--------|---------------|--------------|--------------|-------------|----------|----------|
| 1      | 11.187        | 681.7        | 30.9         | 0.3434      | 0.923    | 49.965   |
| 2      | 12.161        | 682.7        | 28.4         | 0.3724      | 0.897    | 50.035   |

**Figure S231. HPLC Spectra of racemic 13**

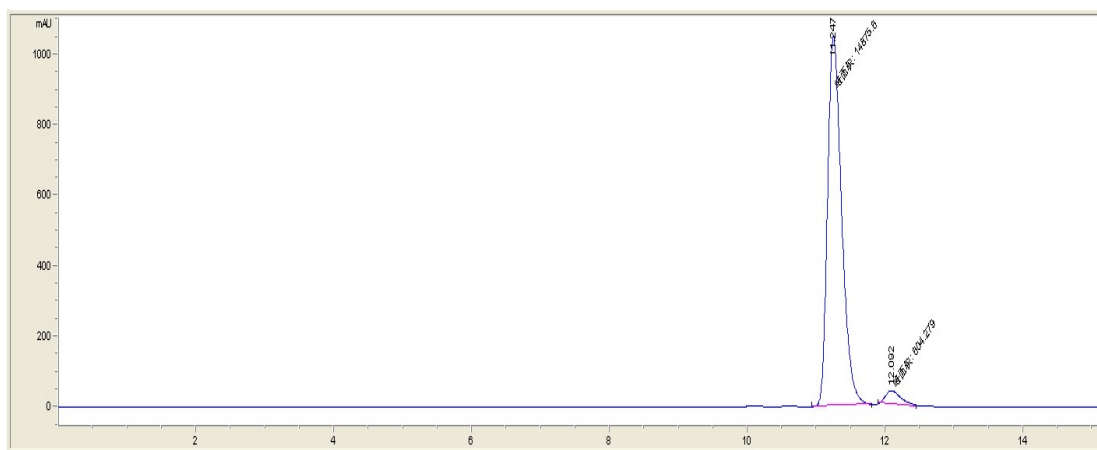

| Peak # | RetTime [min] | Area [mAU*s] | Height [mAU] | Width [min] | Symmetry | Area [%] |
|--------|---------------|--------------|--------------|-------------|----------|----------|
| 1      | 11.247        | 14875.6      | 1049.9       | 0.2362      | 0.676    | 96.096   |
| 2      | 12.092        | 604.3        | 38.8         | 0.2596      | 0.621    | 3.904    |

**Figure S232. HPLC Spectra of 13**

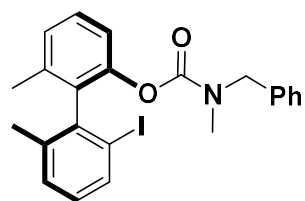

14

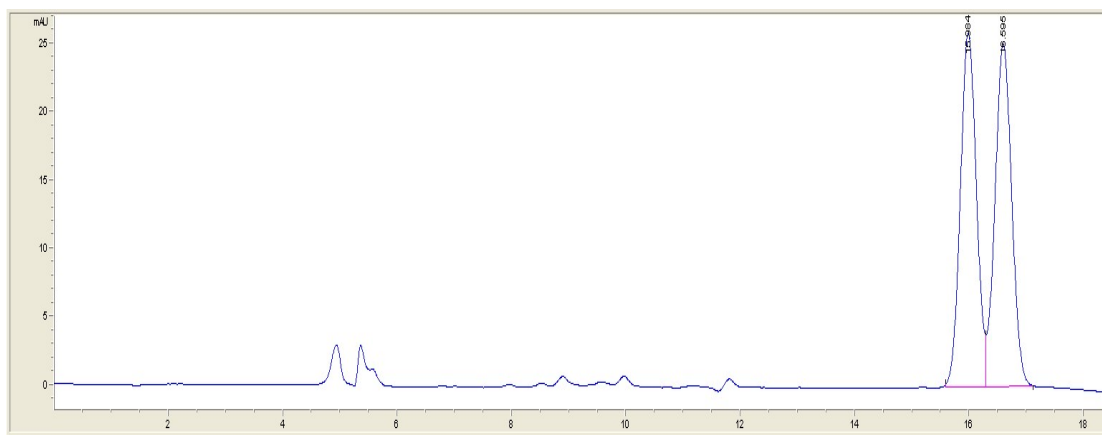

| Peak # | RetTime [min] | Area [mAU*s] | Height [mAU] | Width [min] | Symmetry [%] | Area [%] |
|--------|---------------|--------------|--------------|-------------|--------------|----------|
| 1      | 15.984        | 507.1        | 25.9         | 0.3042      | 0.946        | 49.733   |
| 2      | 16.595        | 512.5        | 25.1         | 0.314       | 0.941        | 50.267   |

Figure S233. HPLC Spectra of racemic 14

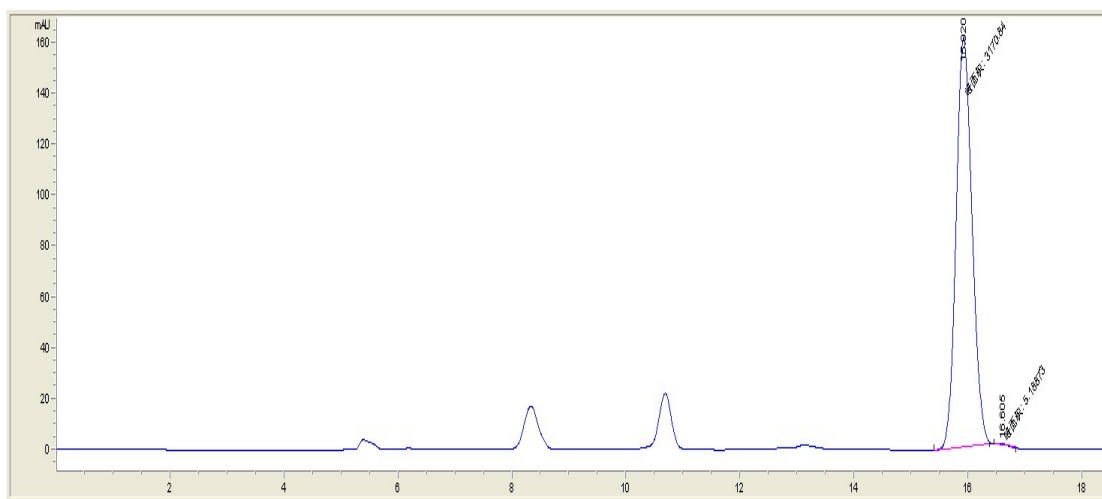

| Peak # | RetTime [min] | Area [mAU*s] | Height [mAU] | Width [min] | Symmetry [%] | Area [%] |
|--------|---------------|--------------|--------------|-------------|--------------|----------|
| 1      | 15.92         | 3170.8       | 161.1        | 0.328       | 0.848        | 99.837   |
| 2      | 16.605        | 5.2          | 5.5E-1       | 0.1582      | 0.229        | 0.163    |

Figure S234. HPLC Spectra of 14

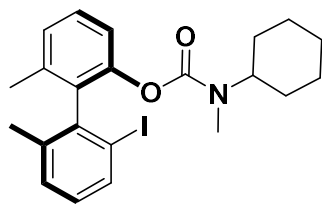

15

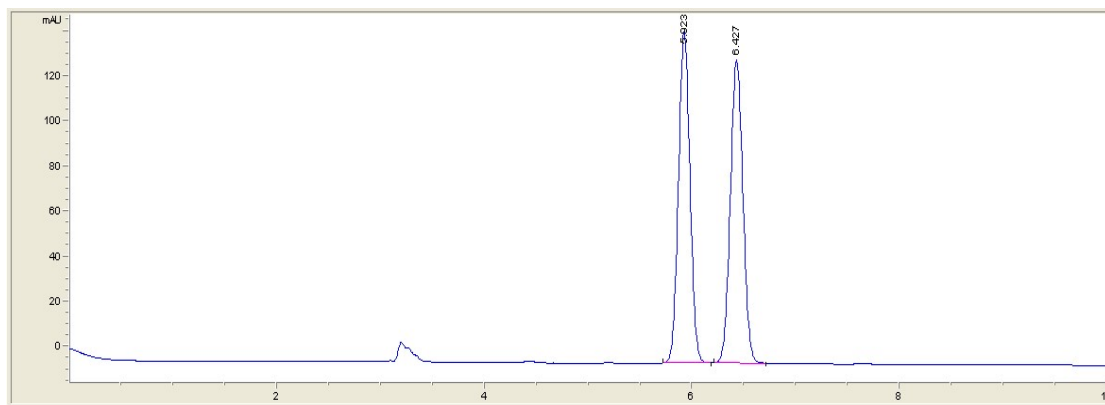

| Peak # | RetTime [min] | Area [mAU*s] | Height [mAU] | Width [min] | Symmetry [%] | Area [%] |
|--------|---------------|--------------|--------------|-------------|--------------|----------|
| 1      | 5.923         | 1136.4       | 147.5        | 0.1199      | 0.937        | 50.000   |
| 2      | 6.427         | 1136.4       | 134.9        | 0.1303      | 0.931        | 50.000   |

Figure S235. HPLC Spectra of racemic 15

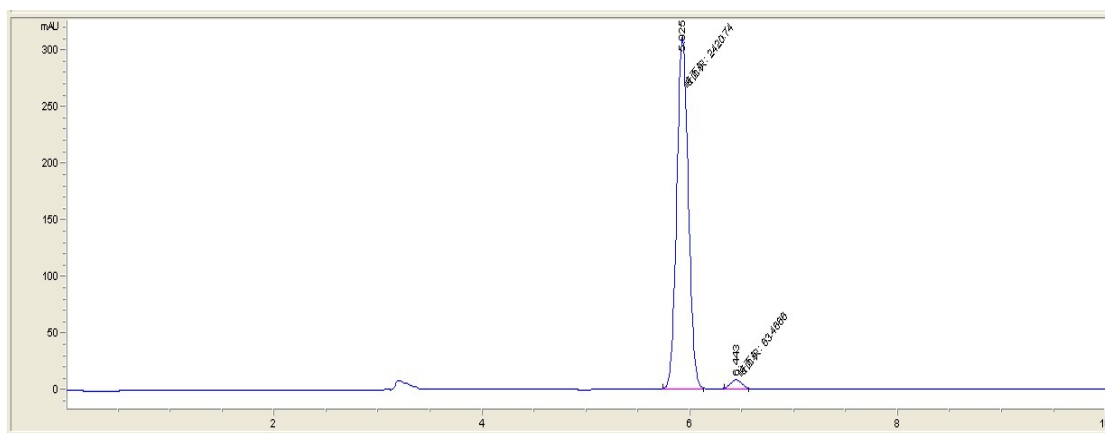

| Peak # | RetTime [min] | Area [mAU*s] | Height [mAU] | Width [min] | Symmetry [%] | Area [%] |
|--------|---------------|--------------|--------------|-------------|--------------|----------|
| 1      | 5.925         | 2420.7       | 310.6        | 0.1299      | 0.916        | 97.445   |
| 2      | 6.443         | 63.5         | 8.1          | 0.1313      | 0.984        | 2.555    |

Figure S236. HPLC Spectra of 15

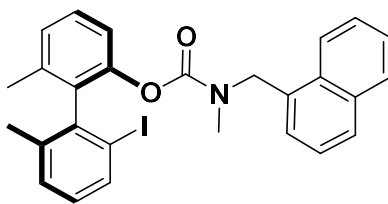

16

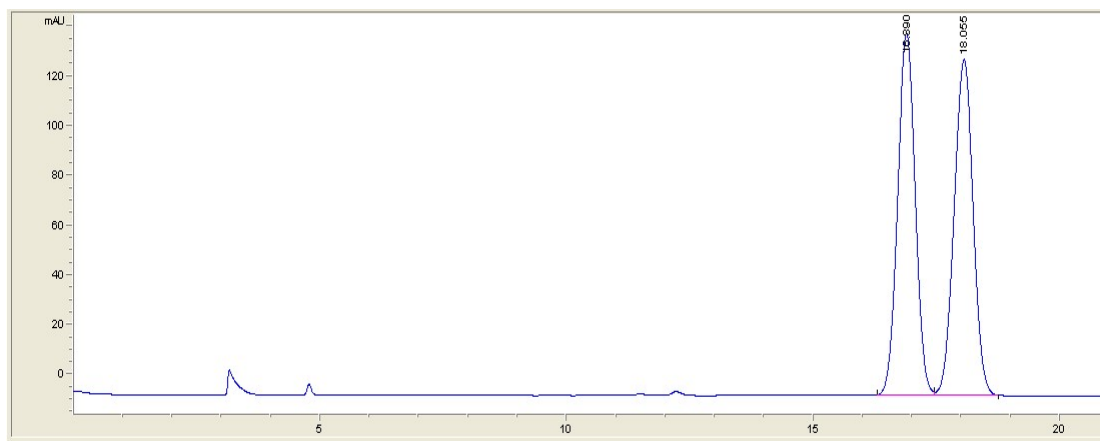

| Peak # | RetTime [min] | Area [mAU*s] | Height [mAU] | Width [min] | Symmetry [%] | Area [%] |
|--------|---------------|--------------|--------------|-------------|--------------|----------|
| 1      | 16.89         | 3610.8       | 146          | 0.3866      | 0.993        | 49.902   |
| 2      | 18.055        | 3625         | 135.1        | 0.4189      | 1.035        | 50.098   |

Figure S237. HPLC Spectra of racemic 16

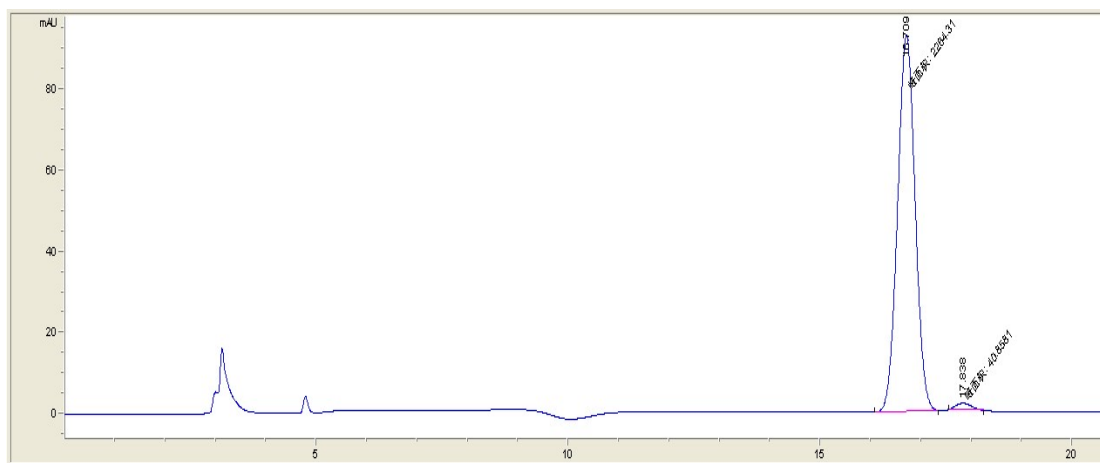

| Peak # | RetTime [min] | Area [mAU*s] | Height [mAU] | Width [min] | Symmetry [%] | Area [%] |
|--------|---------------|--------------|--------------|-------------|--------------|----------|
| 1      | 16.709        | 2264.3       | 93           | 0.406       | 0.979        | 98.228   |
| 2      | 17.838        | 40.9         | 1.8          | 0.3801      | 0.951        | 1.772    |

Figure S238. HPLC Spectra of 16

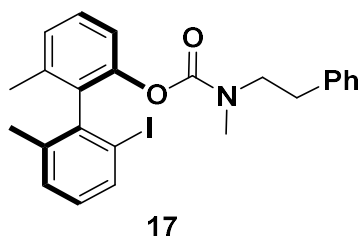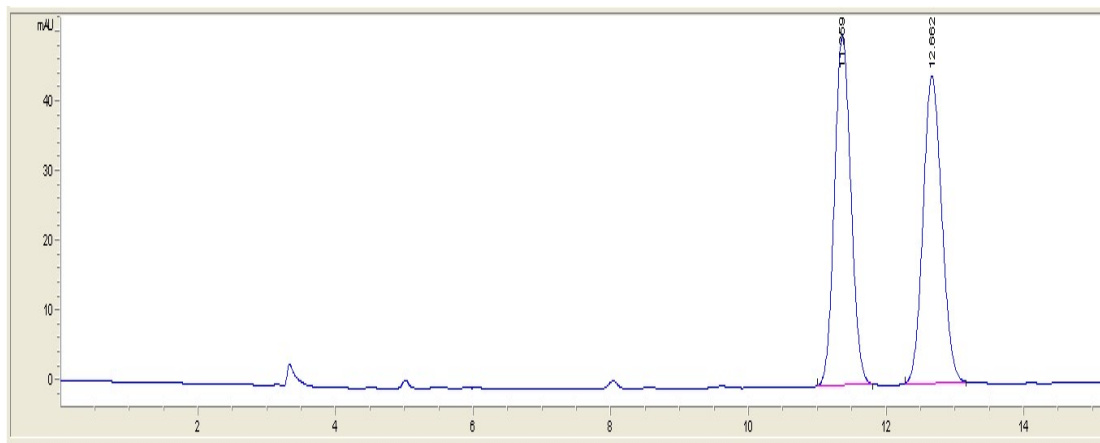

| Peak # | RetTime [min] | Area [mAU*s] | Height [mAU] | Width [min] | Symmetry | Area [%] |
|--------|---------------|--------------|--------------|-------------|----------|----------|
| 1      | 11.359        | 839.3        | 50.5         | 0.26        | 0.883    | 50.030   |
| 2      | 12.662        | 838.3        | 44.2         | 0.2934      | 0.871    | 49.970   |

**Figure 239.** HPLC Spectra of racemic **17**

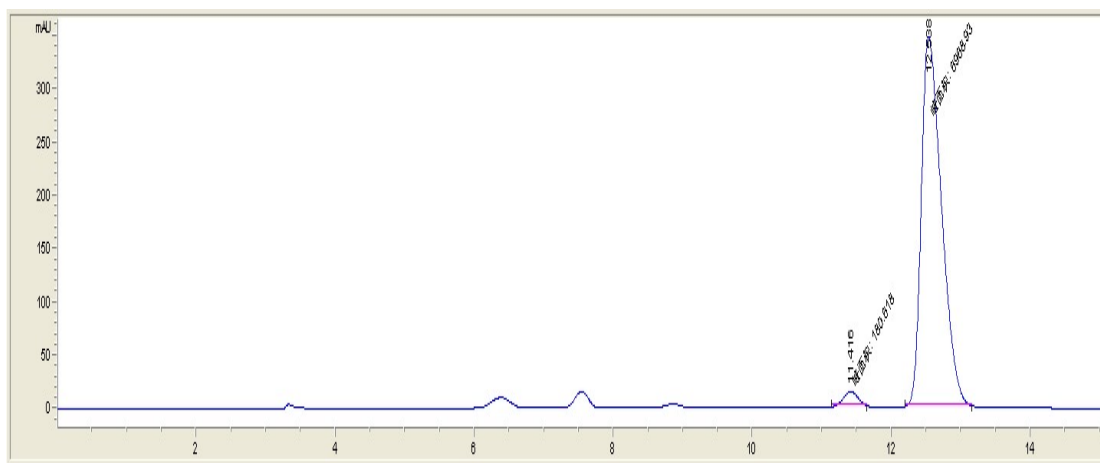

| Peak # | RetTime [min] | Area [mAU*s] | Height [mAU] | Width [min] | Symmetry | Area [%] |
|--------|---------------|--------------|--------------|-------------|----------|----------|
| 1      | 11.416        | 180.6        | 13           | 0.2318      | 0.97     | 2.526    |
| 2      | 12.538        | 6968.9       | 345.8        | 0.3358      | 0.571    | 97.474   |

**Figure S240.** HPLC Spectra of **17**

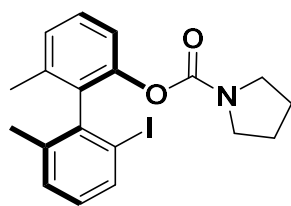

**18**

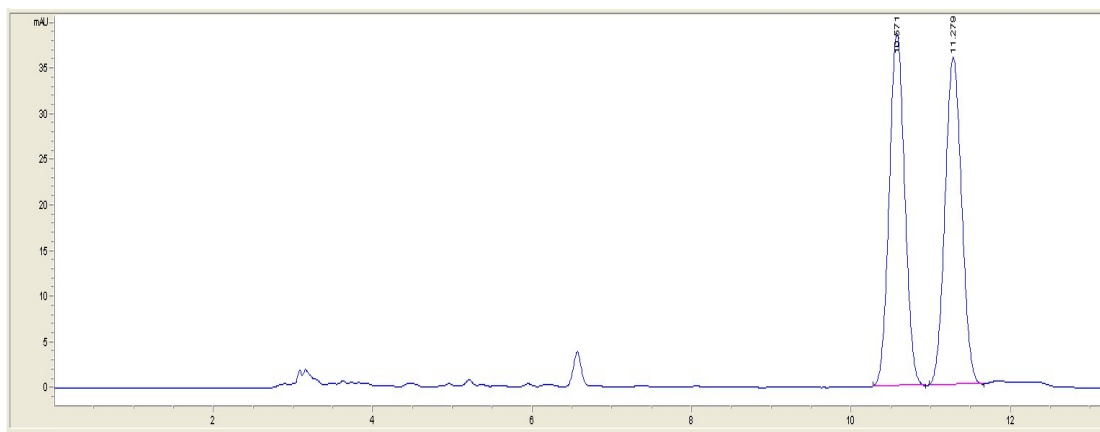

| Peak # | RetTime [min] | Area [mAU*s] | Height [mAU] | Width [min] | Symmetry [%] | Area [%] |
|--------|---------------|--------------|--------------|-------------|--------------|----------|
| 1      | 10.571        | 524.4        | 38.7         | 0.2122      | 0.933        | 50.204   |
| 2      | 11.279        | 520.1        | 35.9         | 0.2271      | 0.933        | 49.796   |

**Figure S241. HPLC Spectra of racemic 18**

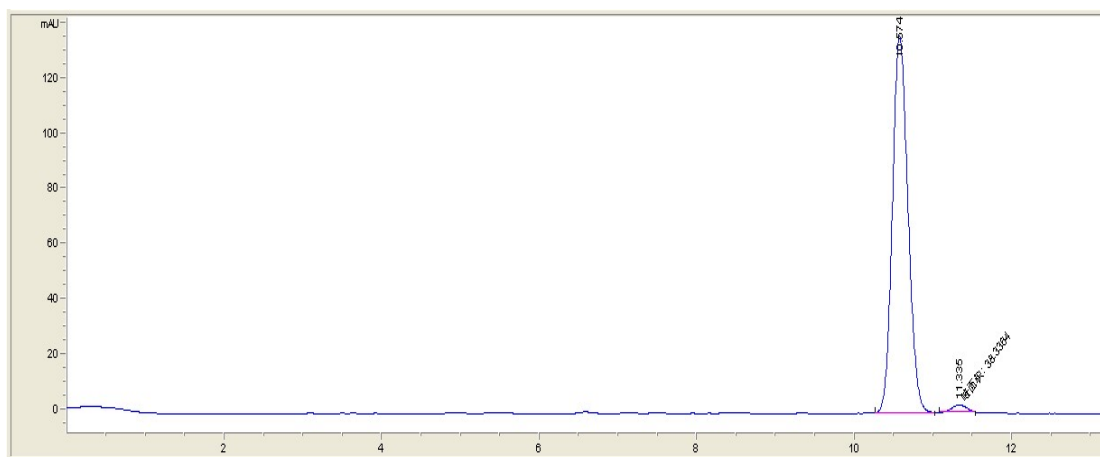

| Peak # | RetTime [min] | Area [mAU*s] | Height [mAU] | Width [min] | Symmetry [%] | Area [%] |
|--------|---------------|--------------|--------------|-------------|--------------|----------|
| 1      | 10.574        | 1877.7       | 136.5        | 0.2125      | 0.822        | 97.999   |
| 2      | 11.335        | 38.3         | 2.8          | 0.2264      | 1.03         | 2.001    |

**Figure S242. HPLC Spectra of 18**

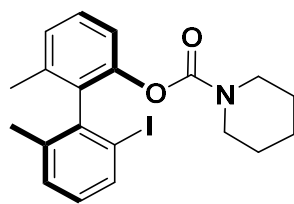

19

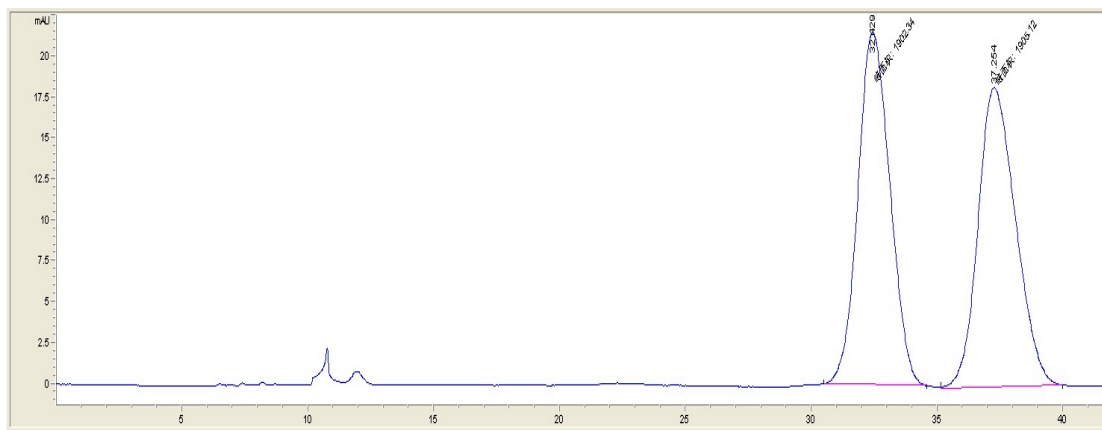

| Peak # | RetTime [min] | Area [mAU*s] | Height [mAU] | Width [min] | Symmetry | Area [%] |
|--------|---------------|--------------|--------------|-------------|----------|----------|
| 1      | 32.429        | 1902.3       | 21.5         | 1.4725      | 0.831    | 49.964   |
| 2      | 37.254        | 1905.1       | 18.3         | 1.736       | 0.728    | 50.036   |

Figure S243. HPLC Spectra of racemic 19

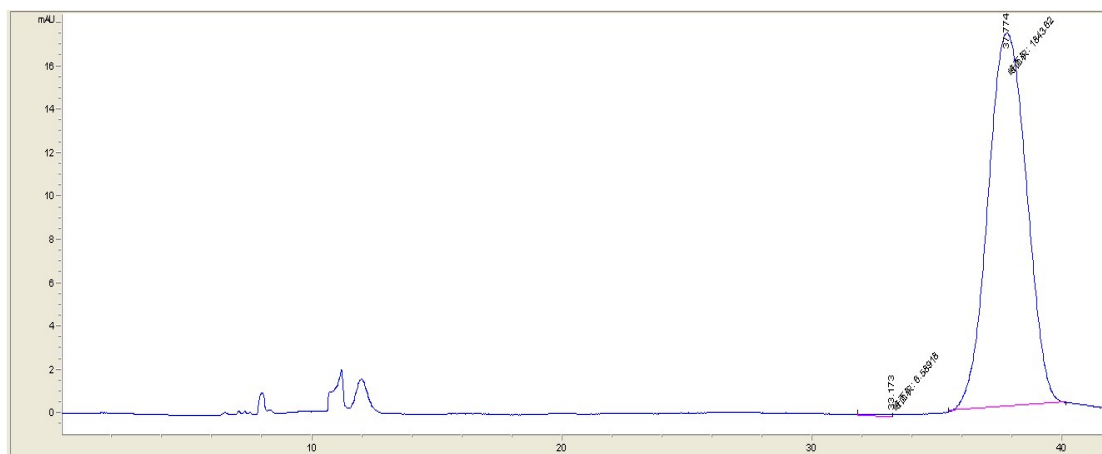

| Peak # | RetTime [min] | Area [mAU*s] | Height [mAU] | Width [min] | Symmetry | Area [%] |
|--------|---------------|--------------|--------------|-------------|----------|----------|
| 1      | 33.173        | 6.6          | 1.1E-1       | 0.9879      | 11.588   | 0.356    |
| 2      | 37.774        | 1843.6       | 17.2         | 1.7846      | 0.922    | 99.644   |

Figure S244. HPLC Spectra of 19

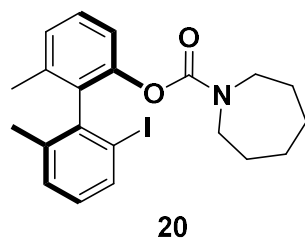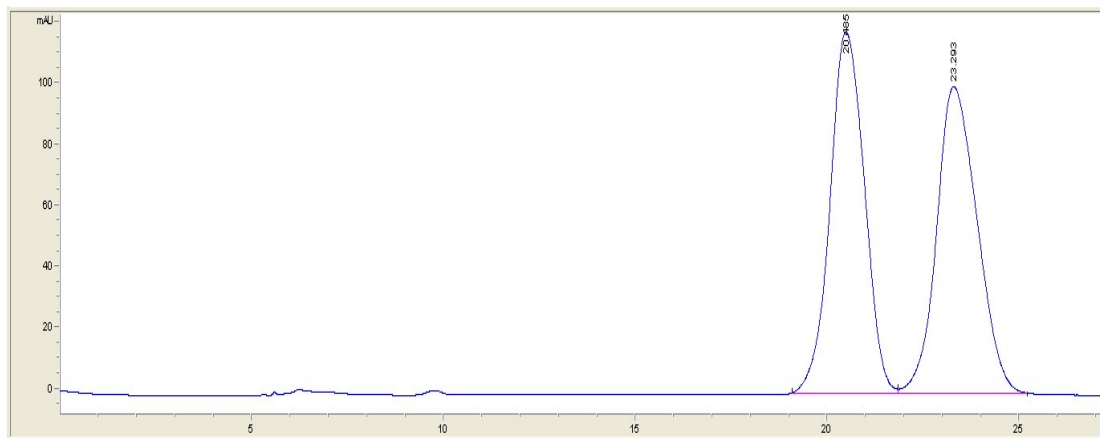

| Peak # | RetTime [min] | Area [mAU*s] | Height [mAU] | Width [min] | Symmetry | Area [%] |
|--------|---------------|--------------|--------------|-------------|----------|----------|
| 1      | 20.485        | 7409.6       | 118.5        | 0.9936      | 0.867    | 50.013   |
| 2      | 23.293        | 7405.8       | 100.6        | 1.127       | 0.728    | 49.987   |

**Figure S245. HPLC Spectra of racemic 20**

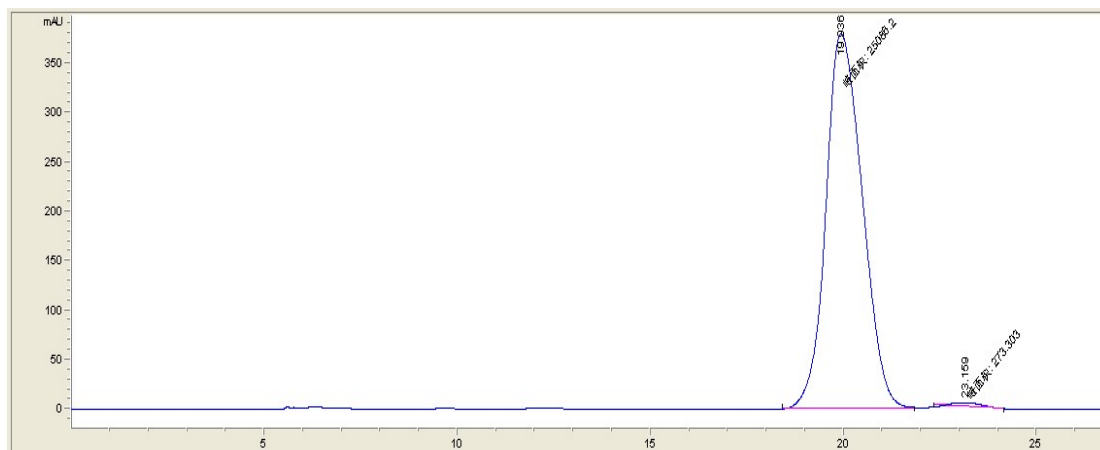

| Peak # | RetTime [min] | Area [mAU*s] | Height [mAU] | Width [min] | Symmetry | Area [%] |
|--------|---------------|--------------|--------------|-------------|----------|----------|
| 1      | 19.936        | 25086.2      | 380.2        | 1.0998      | 0.706    | 98.922   |
| 2      | 23.159        | 273.3        | 4.8          | 0.9539      | 0.542    | 1.078    |

**Figure S246. HPLC Spectra of 20**



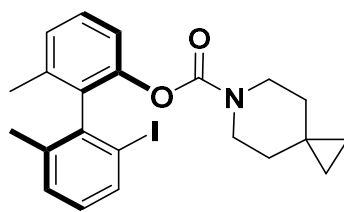

21

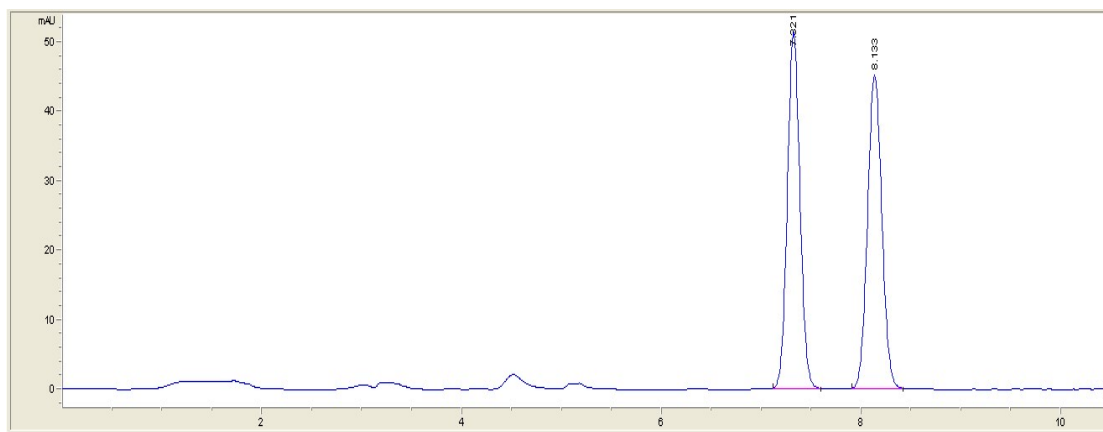

| Peak # | RetTime [min] | Area [mAU*s] | Height [mAU] | Width [min] | Symmetry | Area [%] |
|--------|---------------|--------------|--------------|-------------|----------|----------|
| 1      | 7.321         | 451.8        | 51.4         | 0.1366      | 0.919    | 50.101   |
| 2      | 8.133         | 450          | 45.2         | 0.1541      | 0.919    | 49.899   |

Figure S247. HPLC Spectra of racemic 21

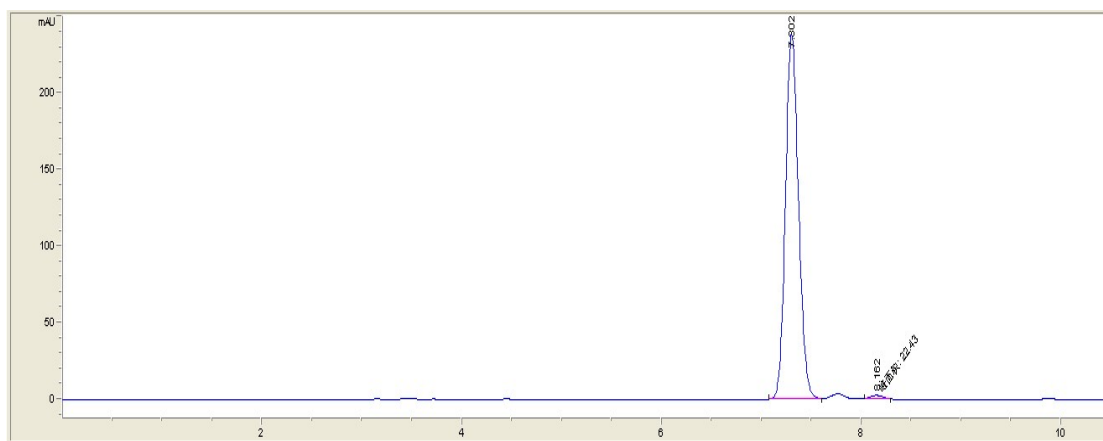

| Peak # | RetTime [min] | Area [mAU*s] | Height [mAU] | Width [min] | Symmetry | Area [%] |
|--------|---------------|--------------|--------------|-------------|----------|----------|
| 1      | 7.302         | 2171.5       | 239          | 0.14        | 0.831    | 98.978   |
| 2      | 8.162         | 22.4         | 2.4          | 0.1551      | 0.733    | 1.022    |

Figure S248. HPLC Spectra of 21

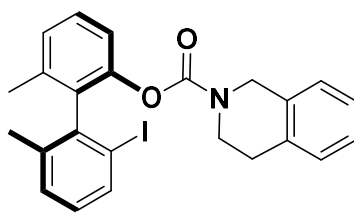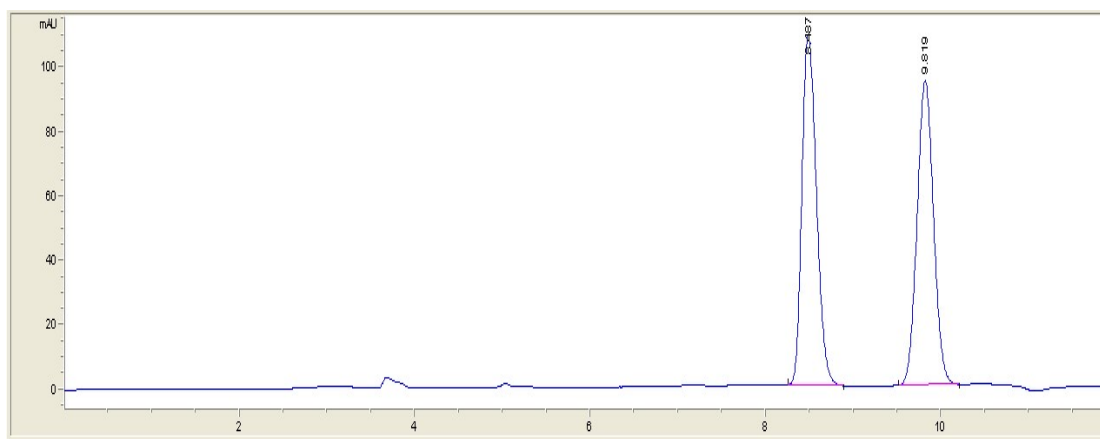

| Peak # | RetTime [min] | Area [mAU*s] | Height [mAU] | Width [min] | Symmetry [%] | Area [%] |
|--------|---------------|--------------|--------------|-------------|--------------|----------|
| 1      | 8.487         | 1247.1       | 109.1        | 0.1774      | 0.737        | 50.172   |
| 2      | 9.819         | 1238.6       | 94.7         | 0.2026      | 0.924        | 49.828   |

**Figure S249.** HPLC Spectra of racemic **22**

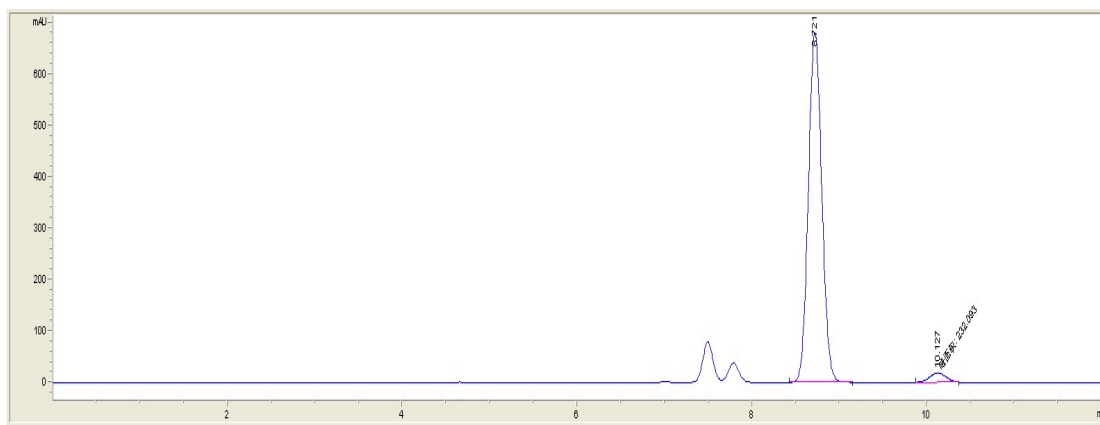

| Peak # | RetTime [min] | Area [mAU*s] | Height [mAU] | Width [min] | Symmetry [%] | Area [%] |
|--------|---------------|--------------|--------------|-------------|--------------|----------|
| 1      | 8.721         | 7265.1       | 679.7        | 0.1667      | 0.91         | 96.904   |
| 2      | 10.127        | 232.1        | 18.2         | 0.2122      | 1.091        | 3.096    |

**Figure S250** HPLC Spectra of **22**

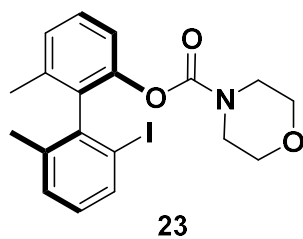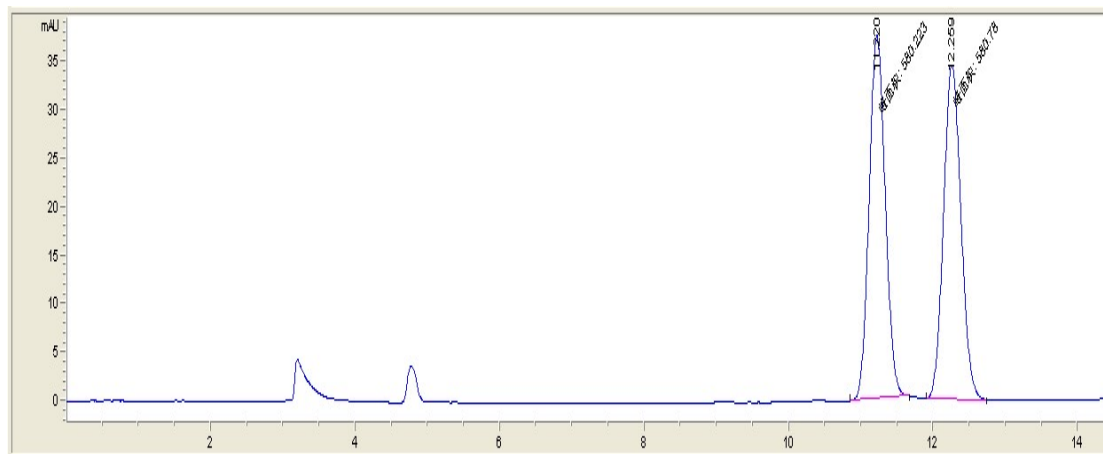

| Peak # | RetTime [min] | Area [mAU*s] | Height [mAU] | Width [min] | Symmetry | Area [%] |
|--------|---------------|--------------|--------------|-------------|----------|----------|
| 1      | 11.22         | 580.2        | 37.4         | 0.2584      | 0.902    | 49.976   |
| 2      | 12.259        | 580.8        | 34.5         | 0.2809      | 0.889    | 50.024   |

**Figure S251. HPLC Spectra of racemic 23**

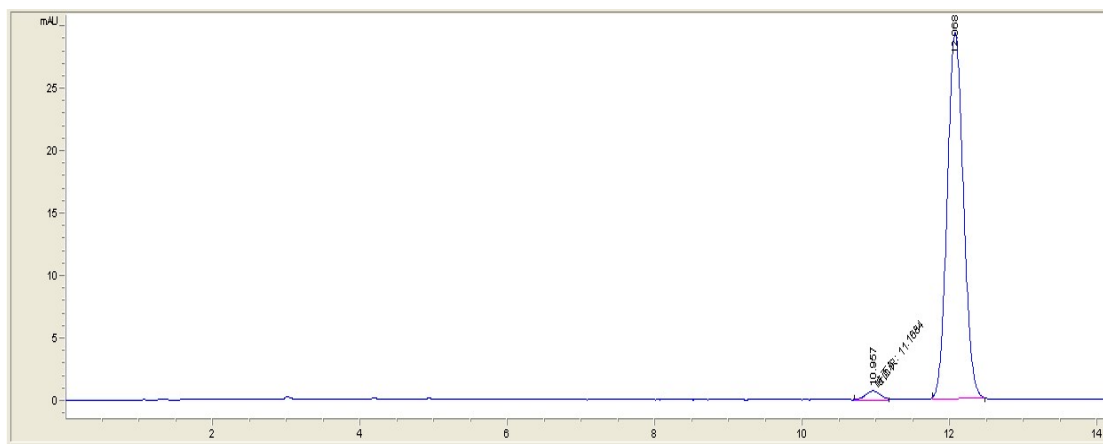

| Peak # | RetTime [min] | Area [mAU*s] | Height [mAU] | Width [min] | Symmetry | Area [%] |
|--------|---------------|--------------|--------------|-------------|----------|----------|
| 1      | 10.957        | 11.2         | 7.5E-1       | 0.2483      | 1.057    | 2.431    |
| 2      | 12.068        | 448.3        | 29.3         | 0.2383      | 0.909    | 97.569   |

**Figure S252. HPLC Spectra of 23**

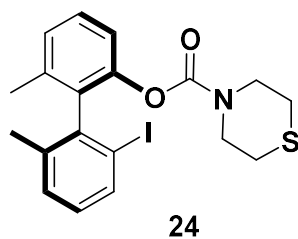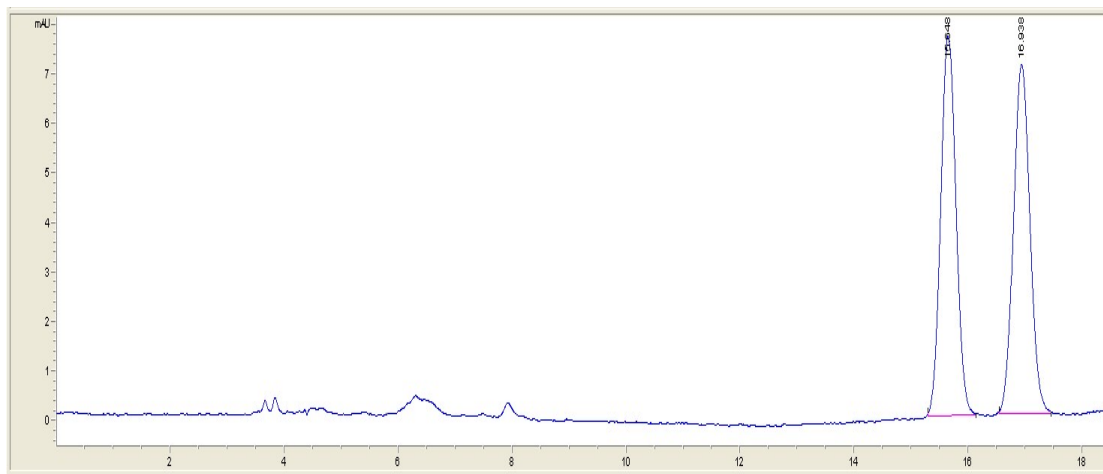

| Peak # | RetTime [min] | Area [mAU*s] | Height [mAU] | Width [min] | Symmetry | Area [%] |
|--------|---------------|--------------|--------------|-------------|----------|----------|
| 1      | 15.648        | 141.8        | 7.7          | 0.2897      | 0.917    | 49.888   |
| 2      | 16.938        | 142.5        | 7.1          | 0.3077      | 0.936    | 50.112   |

**Figure S253. HPLC Spectra of racemic 24**

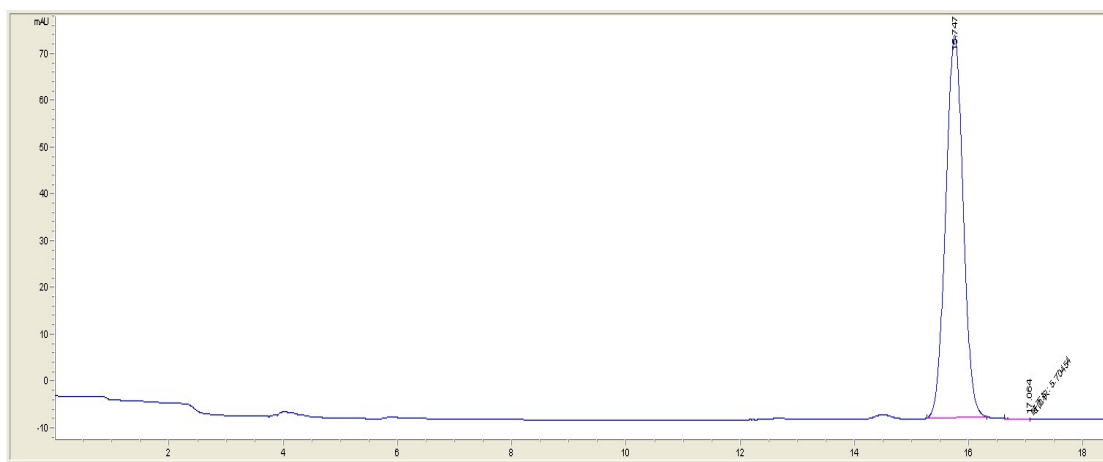

| Peak # | RetTime [min] | Area [mAU*s] | Height [mAU] | Width [min] | Symmetry | Area [%] |
|--------|---------------|--------------|--------------|-------------|----------|----------|
| 1      | 15.747        | 1746.8       | 81.9         | 0.3307      | 1.009    | 99.674   |
| 2      | 17.064        | 5.7          | 2.9E-1       | 0.3238      | 1.352    | 0.326    |

**Figure S254. HPLC Spectra of 24**

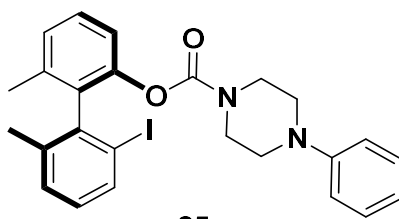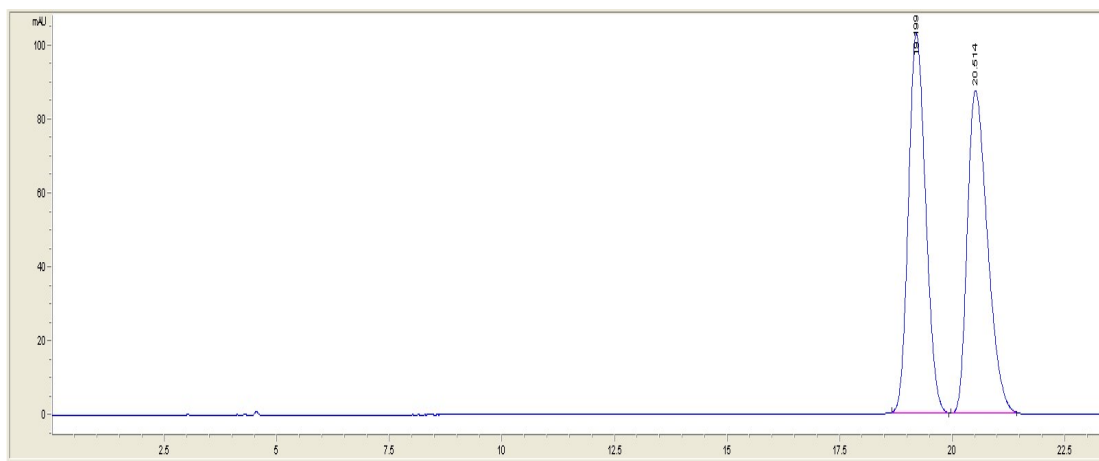

| Peak # | RetTime [min] | Area [mAU*s] | Height [mAU] | Width [min] | Symmetry [%] | Area [%] |
|--------|---------------|--------------|--------------|-------------|--------------|----------|
| 1      | 19.199        | 2731         | 102.6        | 0.4145      | 0.814        | 50.020   |
| 2      | 20.514        | 2728.8       | 87.3         | 0.4845      | 0.64         | 49.980   |

**Figure S255.** HPLC Spectra of racemic **25**

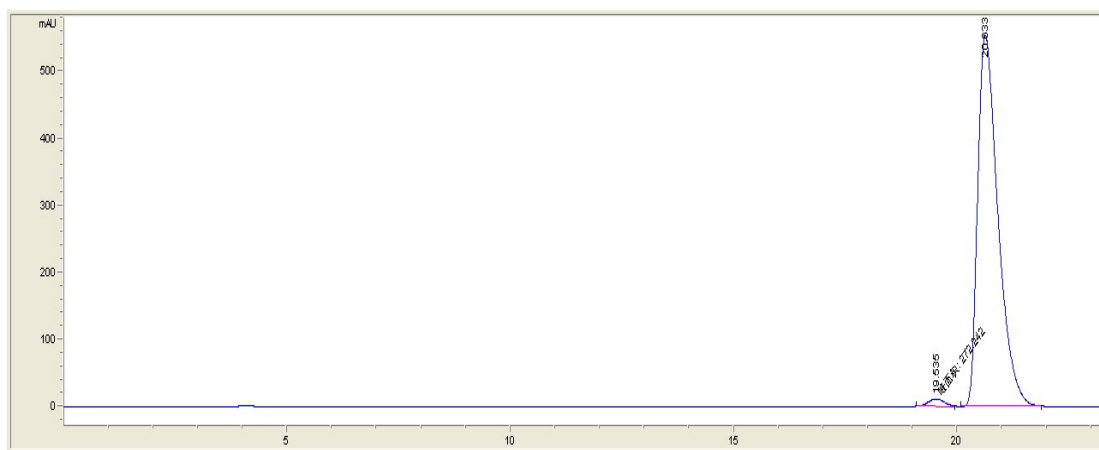

| Peak # | RetTime [min] | Area [mAU*s] | Height [mAU] | Width [min] | Symmetry [%] | Area [%] |
|--------|---------------|--------------|--------------|-------------|--------------|----------|
| 1      | 19.535        | 272.2        | 11.1         | 0.4099      | 0.823        | 1.536    |
| 2      | 20.633        | 17453.9      | 553.5        | 0.4819      | 0.563        | 98.464   |

**Figure S256.** HPLC Spectra of **25**

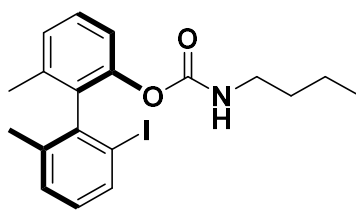

26

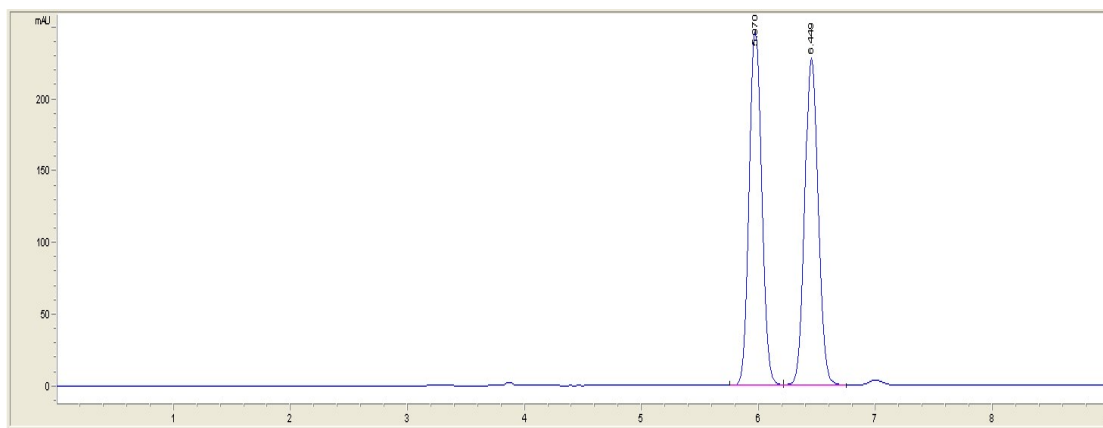

| Peak # | RetTime [min] | Area [mAU*s] | Height [mAU] | Width [min] | Symmetry | Area [%] |
|--------|---------------|--------------|--------------|-------------|----------|----------|
| 1      | 5.97          | 1817.4       | 246.2        | 0.1141      | 0.891    | 49.898   |
| 2      | 6.449         | 1824.9       | 227.8        | 0.1235      | 0.893    | 50.102   |

Figure S257. HPLC Spectra of racemic 26

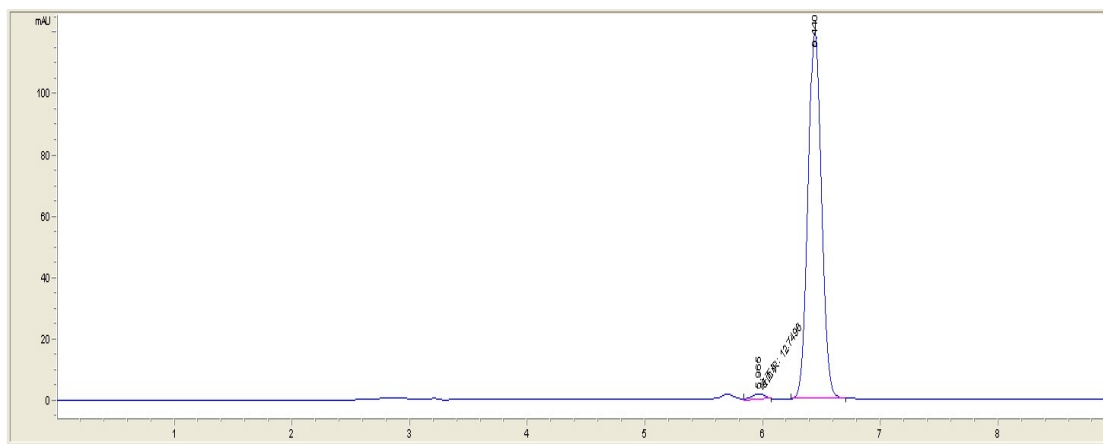

| Peak # | RetTime [min] | Area [mAU*s] | Height [mAU] | Width [min] | Symmetry | Area [%] |
|--------|---------------|--------------|--------------|-------------|----------|----------|
| 1      | 5.965         | 12.7         | 1.7          | 0.1223      | 1.535    | 1.321    |
| 2      | 6.44          | 952.6        | 119.6        | 0.1249      | 0.917    | 98.679   |

Figure S258. HPLC Spectra of 26

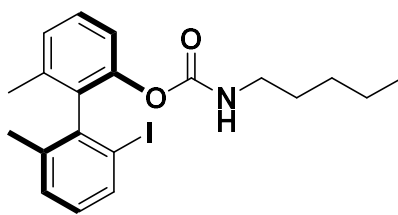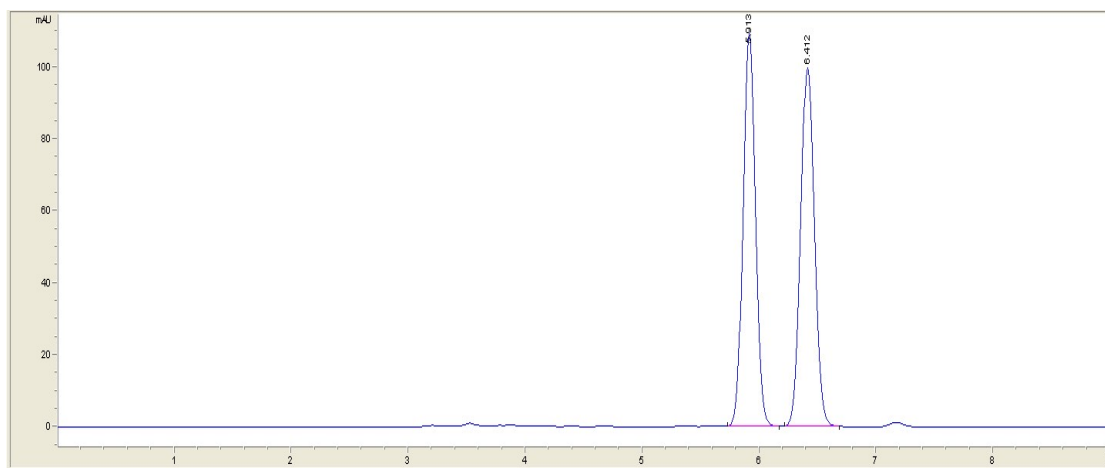

| Peak # | RetTime [min] | Area [mAU*s] | Height [mAU] | Width [min] | Symmetry | Area [%] |
|--------|---------------|--------------|--------------|-------------|----------|----------|
| 1      | 5.913         | 802.3        | 109.2        | 0.1137      | 0.918    | 49.871   |
| 2      | 6.412         | 806.5        | 99.7         | 0.1244      | 0.916    | 50.129   |

**Figure S259.** HPLC Spectra of racemic **27**

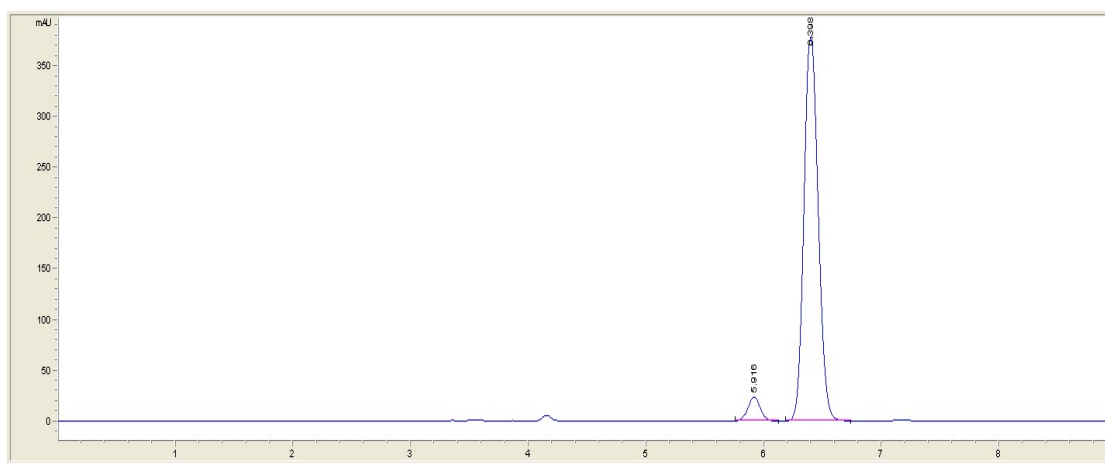

| Peak # | RetTime [min] | Area [mAU*s] | Height [mAU] | Width [min] | Symmetry | Area [%] |
|--------|---------------|--------------|--------------|-------------|----------|----------|
| 1      | 5.916         | 173.5        | 23.7         | 0.1134      | 0.951    | 5.320    |
| 2      | 6.398         | 3087.4       | 379.2        | 0.125       | 0.837    | 94.680   |

**Figure S260** HPLC Spectra of **27**

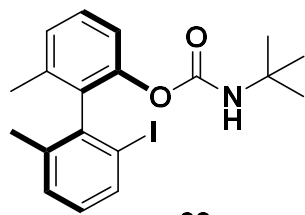

28

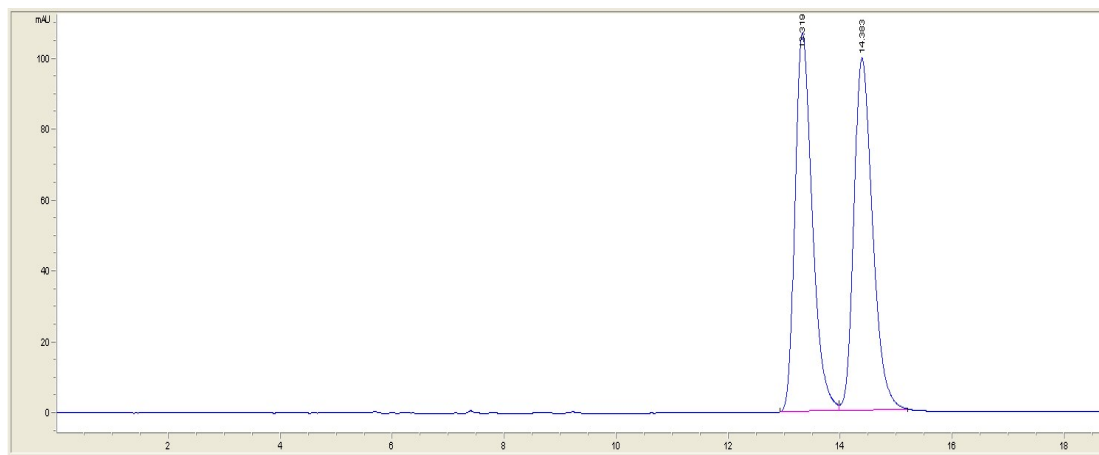

| Peak # | RetTime [min] | Area [mAU*s] | Height [mAU] | Width [min] | Symmetry [%] | Area [%] |
|--------|---------------|--------------|--------------|-------------|--------------|----------|
| 1      | 13.319        | 2302.2       | 107          | 0.3311      | 0.682        | 49.824   |
| 2      | 14.383        | 2318.5       | 99.6         | 0.3576      | 0.701        | 50.176   |

Figure S261. HPLC Spectra of racemic 28

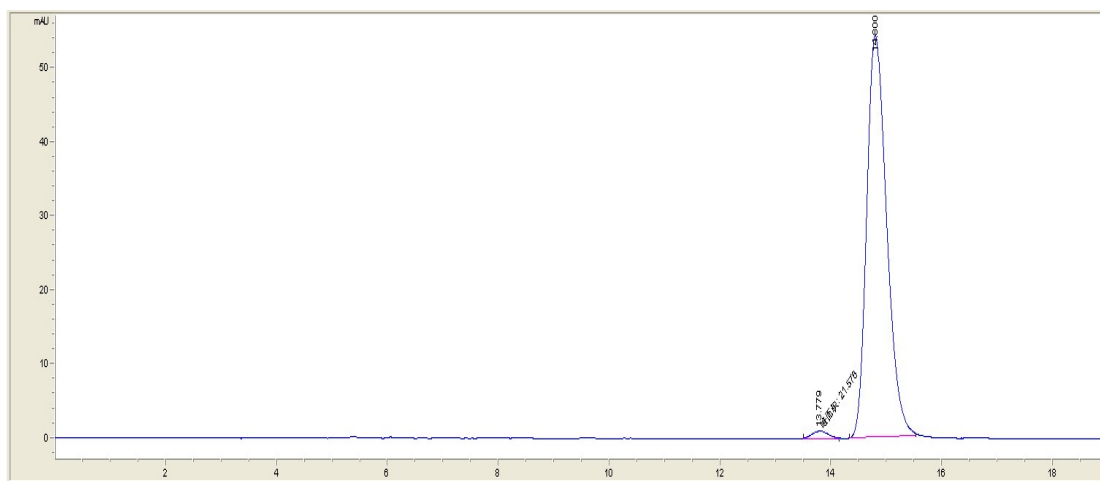

| Peak # | RetTime [min] | Area [mAU*s] | Height [mAU] | Width [min] | Symmetry [%] | Area [%] |
|--------|---------------|--------------|--------------|-------------|--------------|----------|
| 1      | 13.779        | 21.6         | 1            | 0.352       | 0.712        | 1.565    |
| 2      | 14.8          | 1356.7       | 54.4         | 0.3852      | 0.724        | 98.435   |

Figure S262. HPLC Spectra of 28



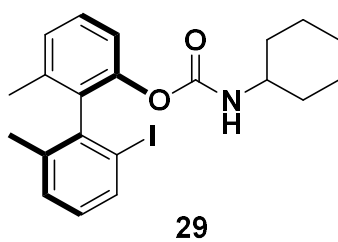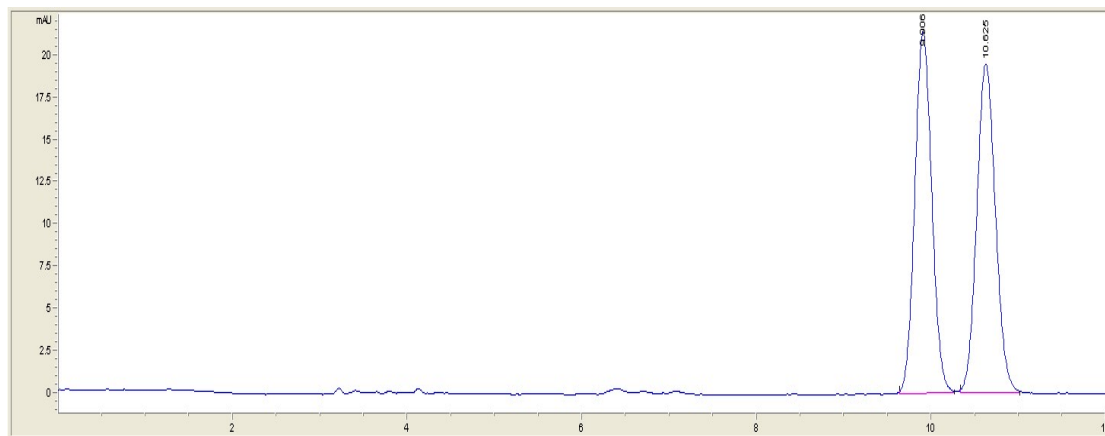

| Peak # | RetTime [min] | Area [mAU*s] | Height [mAU] | Width [min] | Symmetry [%] | Area [%] |
|--------|---------------|--------------|--------------|-------------|--------------|----------|
| 1      | 9.906         | 291.4        | 21.5         | 0.2103      | 0.907        | 49.961   |
| 2      | 10.625        | 291.8        | 19.5         | 0.2303      | 0.893        | 50.039   |

**Figure S263. HPLC Spectra of racemic 29**

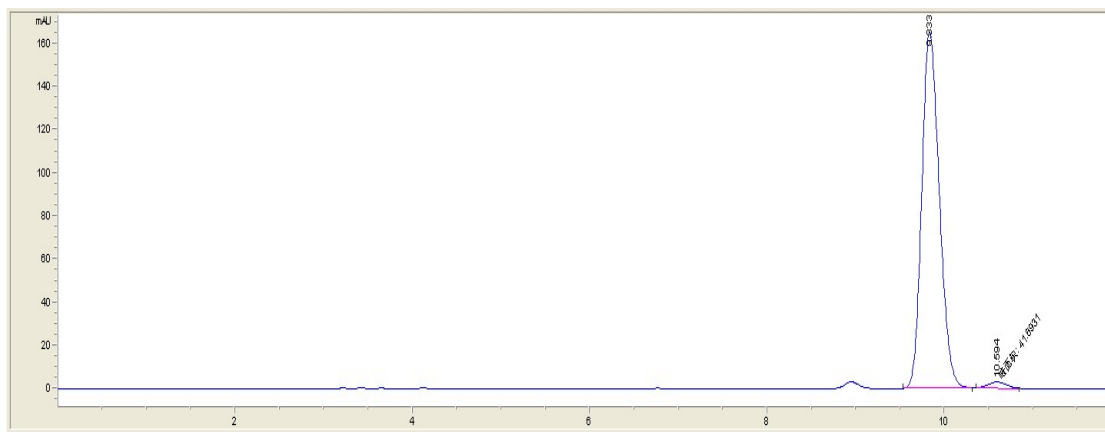

| Peak # | RetTime [min] | Area [mAU*s] | Height [mAU] | Width [min] | Symmetry [%] | Area [%] |
|--------|---------------|--------------|--------------|-------------|--------------|----------|
| 1      | 9.833         | 2277         | 165.1        | 0.2129      | 0.767        | 98.202   |
| 2      | 10.594        | 41.7         | 2.9          | 0.2396      | 0.772        | 1.798    |

**Figure S264. HPLC Spectra of 29**

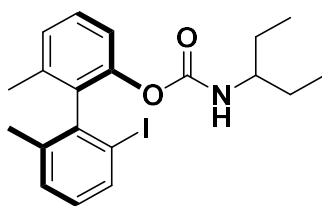

**30**

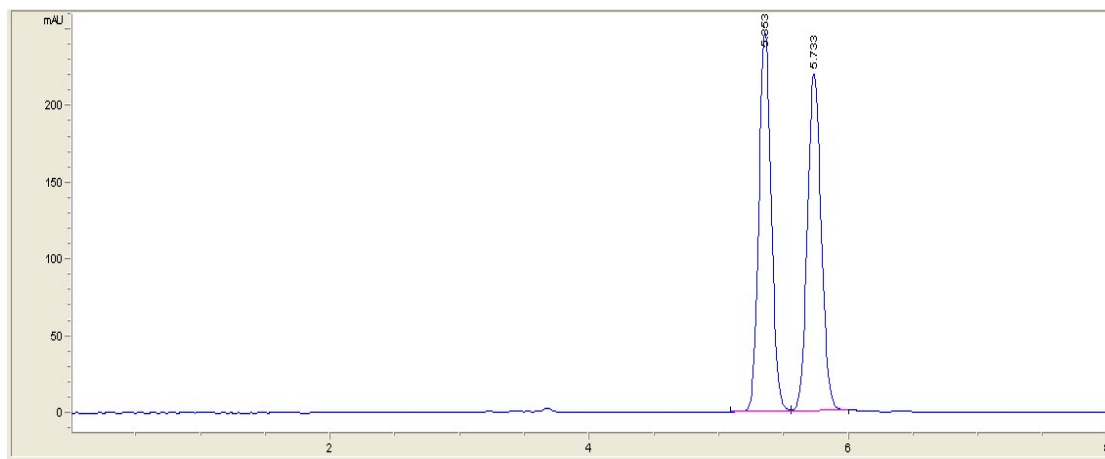

| Peak # | RetTime [min] | Area [mAU*s] | Height [mAU] | Width [min] | Symmetry | Area [%] |
|--------|---------------|--------------|--------------|-------------|----------|----------|
| 1      | 5.353         | 1646.8       | 247.5        | 0.1036      | 0.905    | 50.000   |
| 2      | 5.733         | 1646.8       | 219.9        | 0.1154      | 0.888    | 50.000   |

**Figure S265. HPLC Spectra of racemic 30**

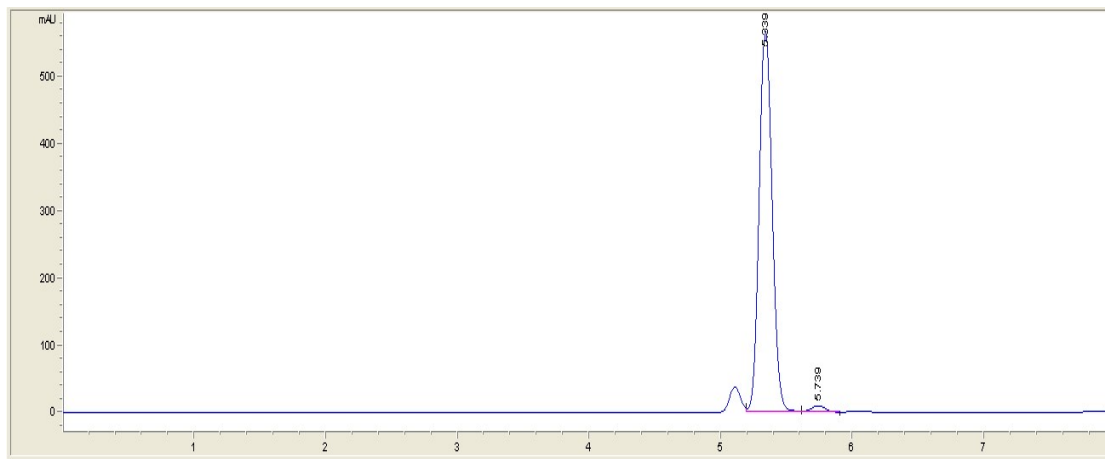

| Peak # | RetTime [min] | Area [mAU*s] | Height [mAU] | Width [min] | Symmetry | Area [%] |
|--------|---------------|--------------|--------------|-------------|----------|----------|
| 1      | 5.339         | 3830         | 566.9        | 0.1048      | 0.859    | 97.992   |
| 2      | 5.739         | 78.5         | 9.8          | 0.1214      | 0.974    | 2.008    |

**Figure S266. HPLC Spectra of 30**

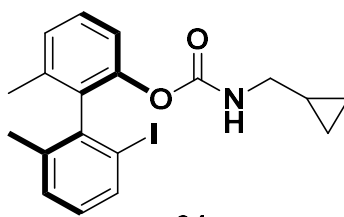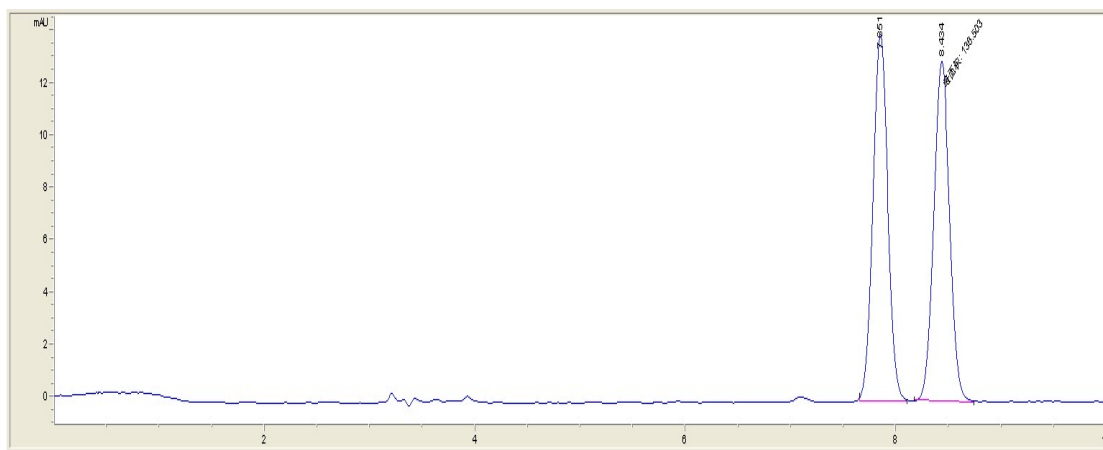

| Peak # | RetTime [min] | Area [mAU*s] | Height [mAU] | Width [min] | Symmetry | Area [%] |
|--------|---------------|--------------|--------------|-------------|----------|----------|
| 1      | 7.851         | 138          | 14           | 0.1527      | 0.942    | 50.279   |
| 2      | 8.434         | 136.5        | 13           | 0.1747      | 0.959    | 49.721   |

**Figure S267. HPLC Spectra of racemic 31**

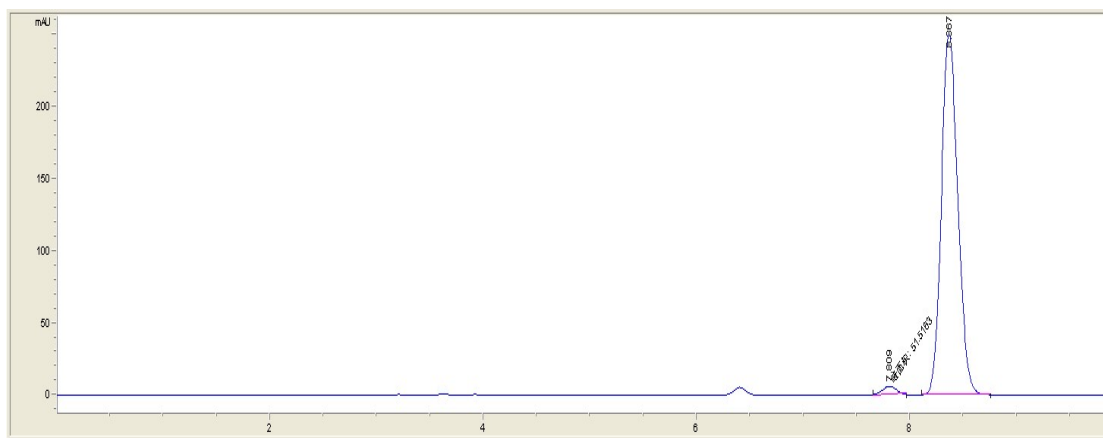

| Peak # | RetTime [min] | Area [mAU*s] | Height [mAU] | Width [min] | Symmetry | Area [%] |
|--------|---------------|--------------|--------------|-------------|----------|----------|
| 1      | 7.809         | 51.5         | 5.7          | 0.1504      | 1.118    | 1.890    |
| 2      | 8.367         | 2674.6       | 250          | 0.1648      | 0.818    | 98.110   |

**Figure S268. HPLC Spectra of 31**

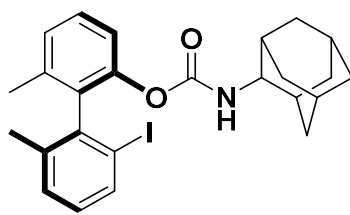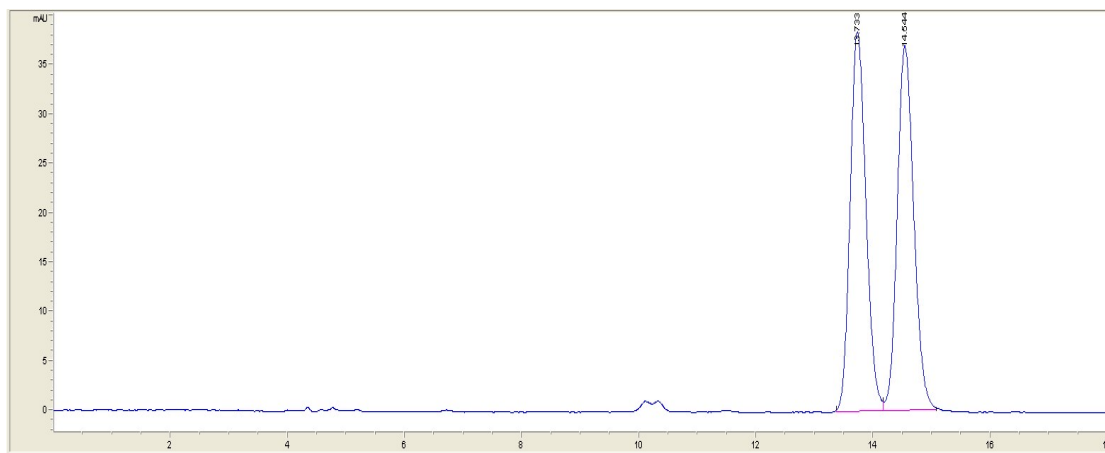

| Peak # | RetTime [min] | Area [mAU*s] | Height [mAU] | Width [min] | Symmetry [%] | Area [%] |
|--------|---------------|--------------|--------------|-------------|--------------|----------|
| 1      | 13.733        | 723.9        | 38.5         | 0.2913      | 0.81         | 49.883   |
| 2      | 14.544        | 727.3        | 37           | 0.3054      | 0.81         | 50.117   |

**Figure S269. HPLC Spectra of racemic 32**

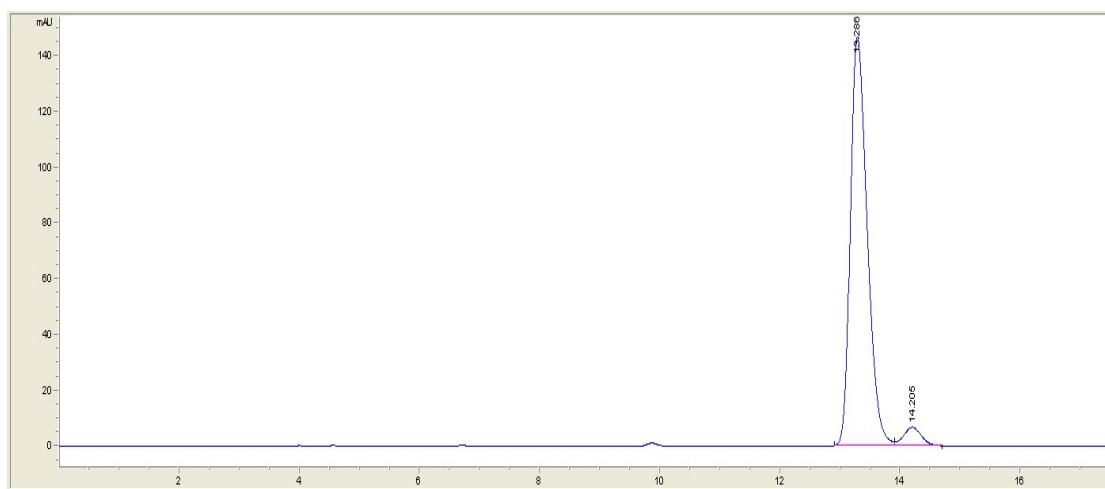

| Peak # | RetTime [min] | Area [mAU*s] | Height [mAU] | Width [min] | Symmetry [%] | Area [%] |
|--------|---------------|--------------|--------------|-------------|--------------|----------|
| 1      | 13.286        | 2862.1       | 146.9        | 0.2993      | 0.655        | 95.386   |
| 2      | 14.205        | 138.4        | 6.7          | 0.3145      | 0.954        | 4.614    |

**Figure S270 HPLC Spectra of 32**

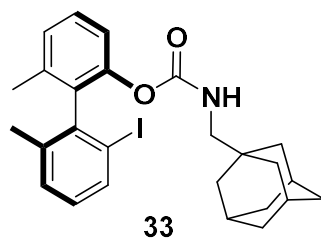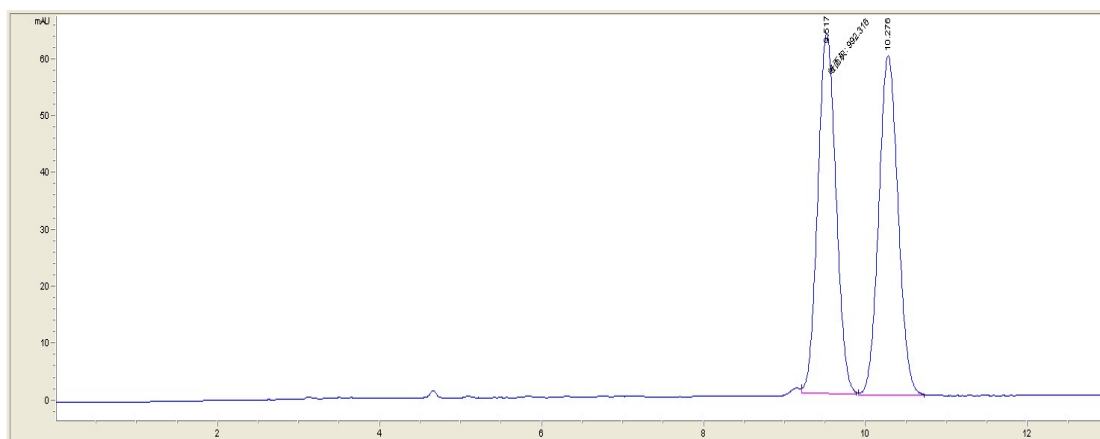

| Peak # | RetTime [min] | Area [mAU*s] | Height [mAU] | Width [min] | Symmetry | Area [%] |
|--------|---------------|--------------|--------------|-------------|----------|----------|
| 1      | 9.517         | 992.3        | 63.3         | 0.2613      | 0.923    | 50.006   |
| 2      | 10.276        | 992.1        | 59.8         | 0.2575      | 0.918    | 49.994   |

**Figure S271. HPLC Spectra of racemic 33**

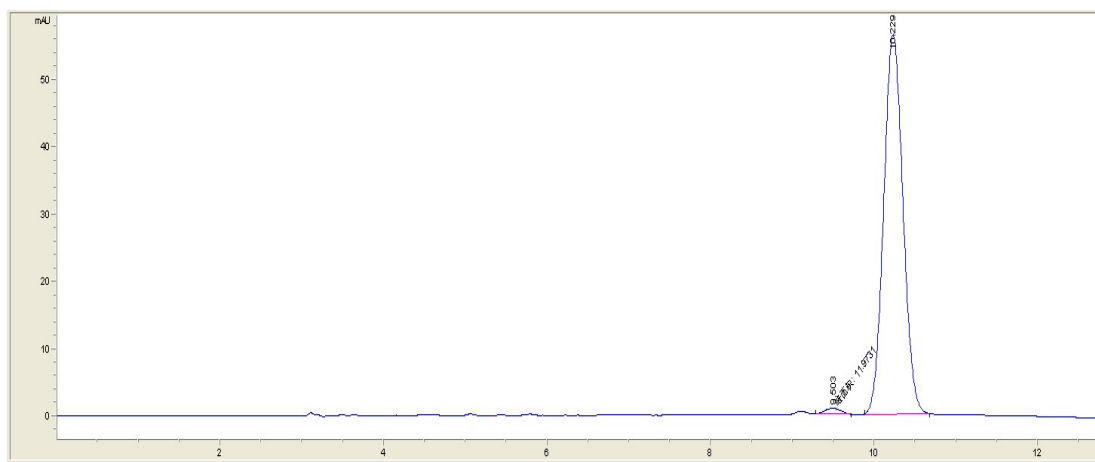

| Peak # | RetTime [min] | Area [mAU*s] | Height [mAU] | Width [min] | Symmetry | Area [%] |
|--------|---------------|--------------|--------------|-------------|----------|----------|
| 1      | 9.503         | 12           | 8.8E-1       | 0.2275      | 0.909    | 1.275    |
| 2      | 10.229        | 926.7        | 56.6         | 0.2571      | 0.914    | 98.725   |

**Figure S272. HPLC Spectra of 33**

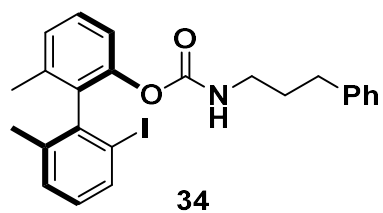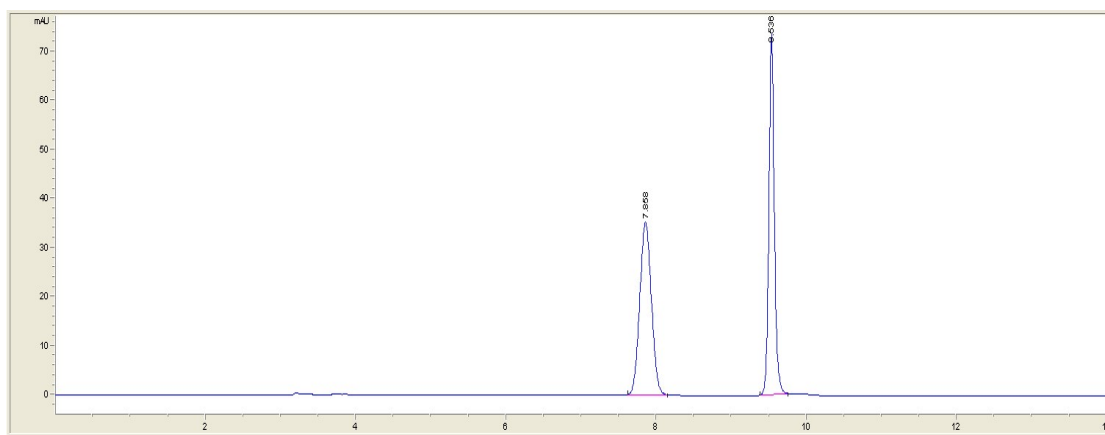

| Peak # | RetTime [min] | Area [mAU*s] | Height [mAU] | Width [min] | Symmetry | Area [%] |
|--------|---------------|--------------|--------------|-------------|----------|----------|
| 1      | 7.858         | 382          | 35.3         | 0.1683      | 0.943    | 50.637   |
| 2      | 9.536         | 371.5        | 73.7         | 0.0768      | 0.917    | 49.303   |

**Figure S273.** HPLC Spectra of racemic **34**

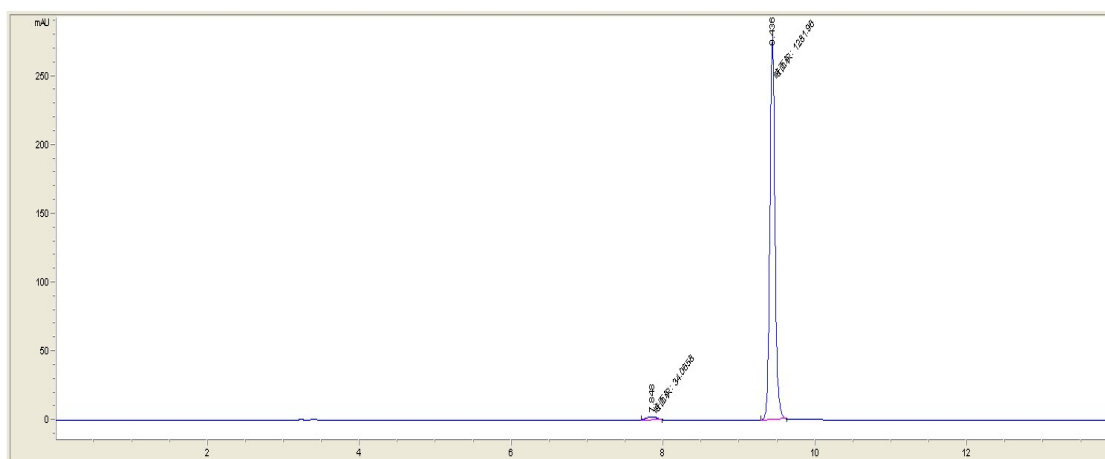

| Peak # | RetTime [min] | Area [mAU*s] | Height [mAU] | Width [min] | Symmetry | Area [%] |
|--------|---------------|--------------|--------------|-------------|----------|----------|
| 1      | 7.848         | 34.1         | 3.1          | 0.1837      | 1.153    | 2.589    |
| 2      | 9.436         | 1282         | 280          | 0.0763      | 0.94     | 97.411   |

**Figure S274.** HPLC Spectra of **34**

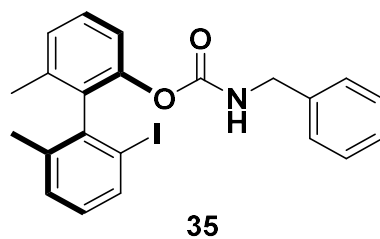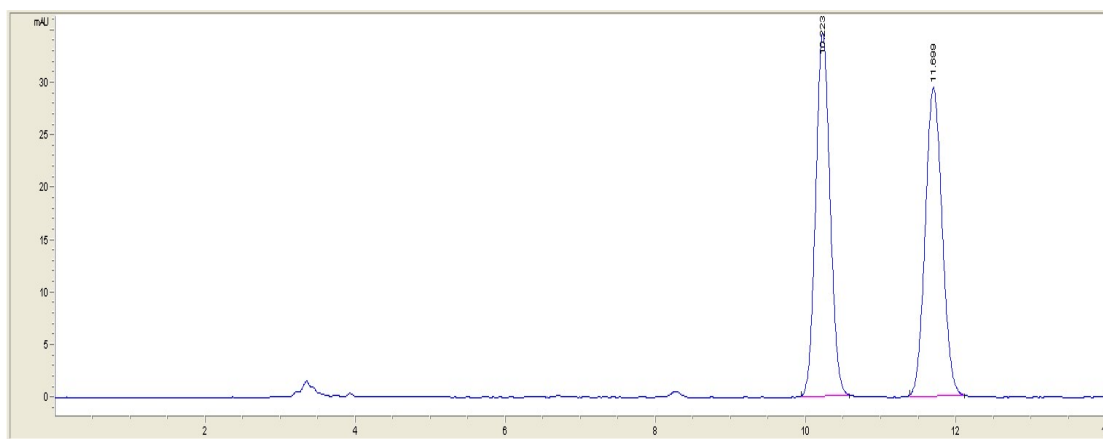

| Peak # | RetTime [min] | Area [mAU*s] | Height [mAU] | Width [min] | Symmetry | Area [%] |
|--------|---------------|--------------|--------------|-------------|----------|----------|
| 1      | 10.223        | 463.9        | 34.7         | 0.2082      | 0.897    | 49.993   |
| 2      | 11.699        | 464          | 29.5         | 0.2435      | 0.899    | 50.007   |

**Figure S275. HPLC Spectra of racemic 35**

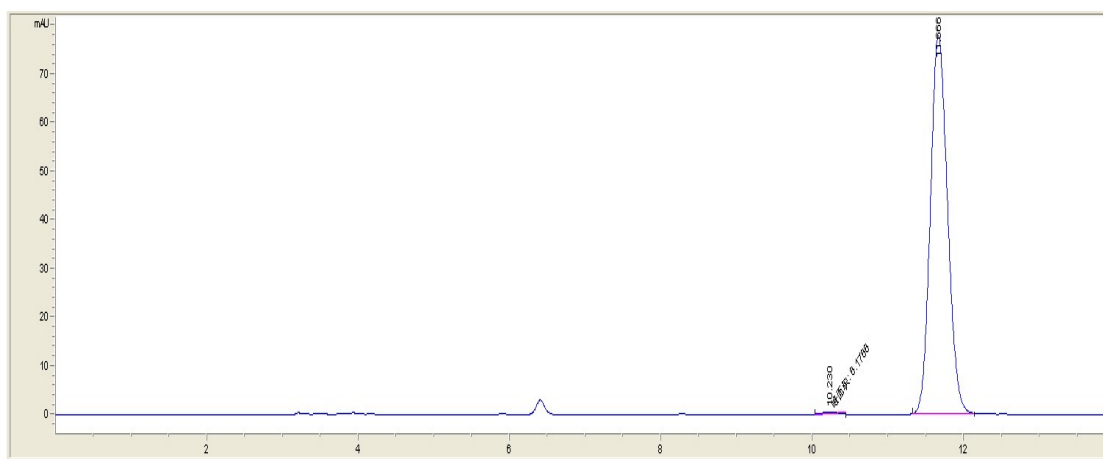

| Peak # | RetTime [min] | Area [mAU*s] | Height [mAU] | Width [min] | Symmetry | Area [%] |
|--------|---------------|--------------|--------------|-------------|----------|----------|
| 1      | 10.23         | 6.2          | 4.9E-1       | 0.2092      | 1.406    | 0.500    |
| 2      | 11.666        | 1228         | 77.8         | 0.2461      | 0.84     | 99.500   |

**Figure S276. HPLC Spectra of 35**

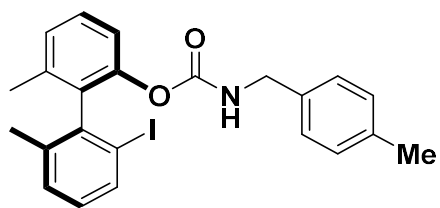

36

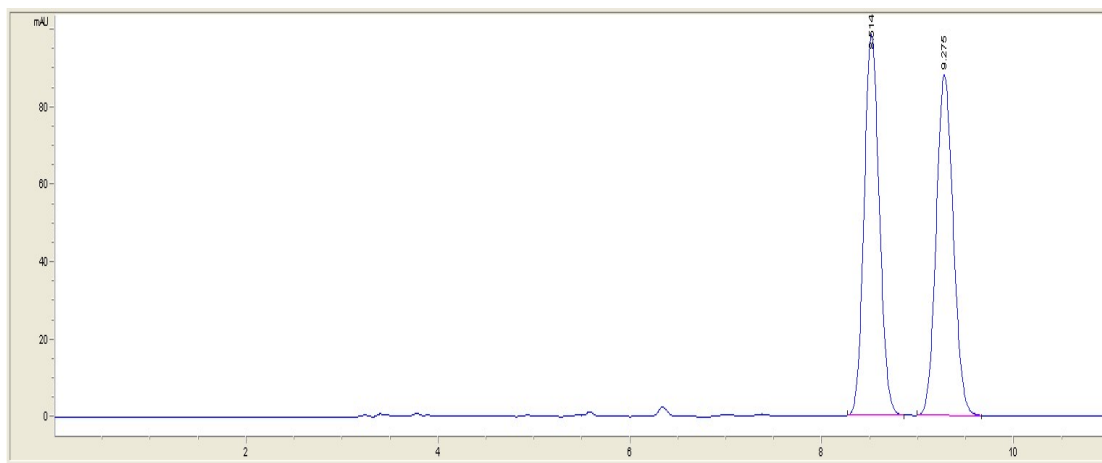

| Peak # | RetTime [min] | Area [mAU*s] | Height [mAU] | Width [min] | Symmetry [%] | Area [%] |
|--------|---------------|--------------|--------------|-------------|--------------|----------|
| 1      | 8.514         | 1090.5       | 98.6         | 0.173       | 0.877        | 49.915   |
| 2      | 9.275         | 1094.2       | 88           | 0.193       | 0.88         | 50.085   |

Figure S277. HPLC Spectra of racemic 36

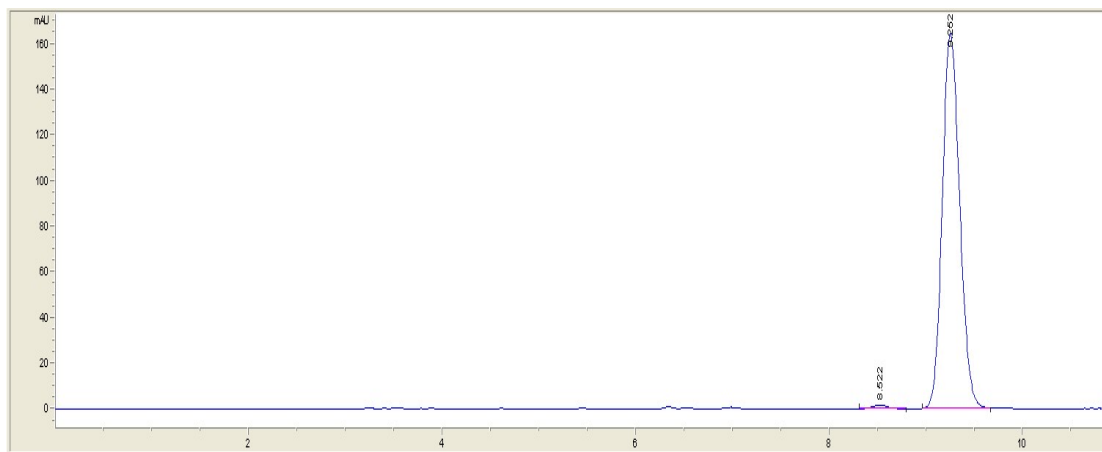

| Peak # | RetTime [min] | Area [mAU*s] | Height [mAU] | Width [min] | Symmetry [%] | Area [%] |
|--------|---------------|--------------|--------------|-------------|--------------|----------|
| 1      | 8.522         | 17.1         | 1.6          | 0.1642      | 0.941        | 0.826    |
| 2      | 9.252         | 2056.7       | 164.8        | 0.1936      | 0.826        | 99.174   |

Figure S278. HPLC Spectra of 36



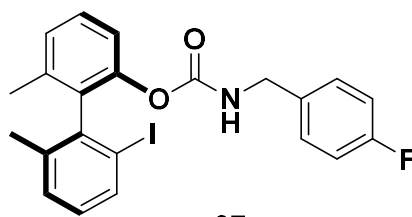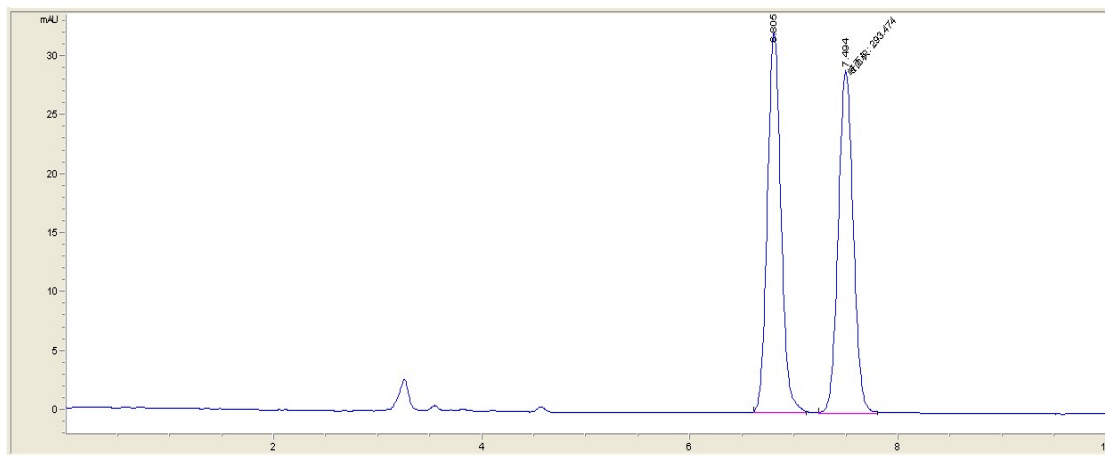

| Peak # | RetTime [min] | Area [mAU*s] | Height [mAU] | Width [min] | Symmetry [%] | Area [%] |
|--------|---------------|--------------|--------------|-------------|--------------|----------|
| 1      | 6.805         | 293.2        | 32.2         | 0.1422      | 0.891        | 49.978   |
| 2      | 7.494         | 293.5        | 29.1         | 0.1678      | 0.947        | 50.022   |

**Figure S279.** HPLC Spectra of racemic **37**

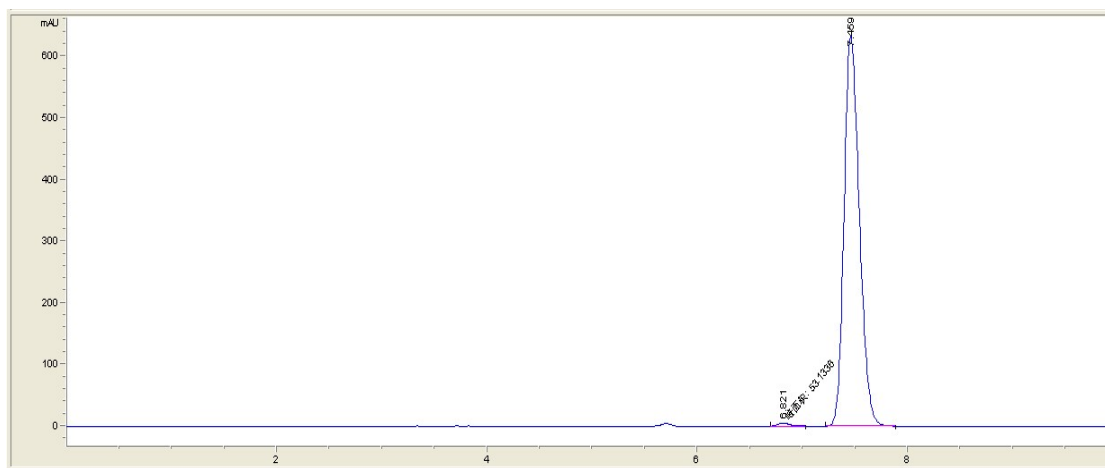

| Peak # | RetTime [min] | Area [mAU*s] | Height [mAU] | Width [min] | Symmetry [%] | Area [%] |
|--------|---------------|--------------|--------------|-------------|--------------|----------|
| 1      | 6.821         | 53.1         | 5.5          | 0.1598      | 0.792        | 0.821    |
| 2      | 7.459         | 6420.5       | 633          | 0.1563      | 0.736        | 99.179   |

**Figure S280** HPLC Spectra of **37**

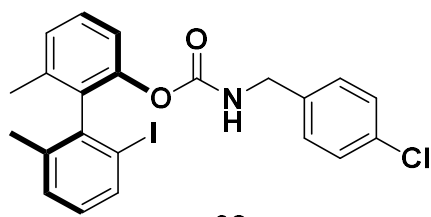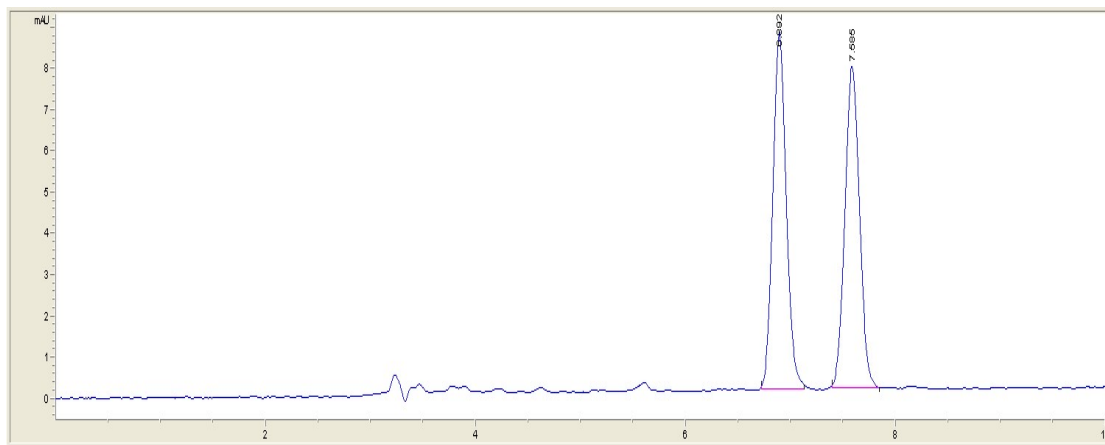

| Peak # | RetTime [min] | Area [mAU*s] | Height [mAU] | Width [min] | Symmetry [%] | Area [%] |
|--------|---------------|--------------|--------------|-------------|--------------|----------|
| 1      | 6.892         | 77.3         | 8.7          | 0.138       | 0.883        | 50.544   |
| 2      | 7.585         | 75.6         | 7.8          | 0.1489      | 0.94         | 49.456   |

**Figure S281. HPLC Spectra of racemic 38**

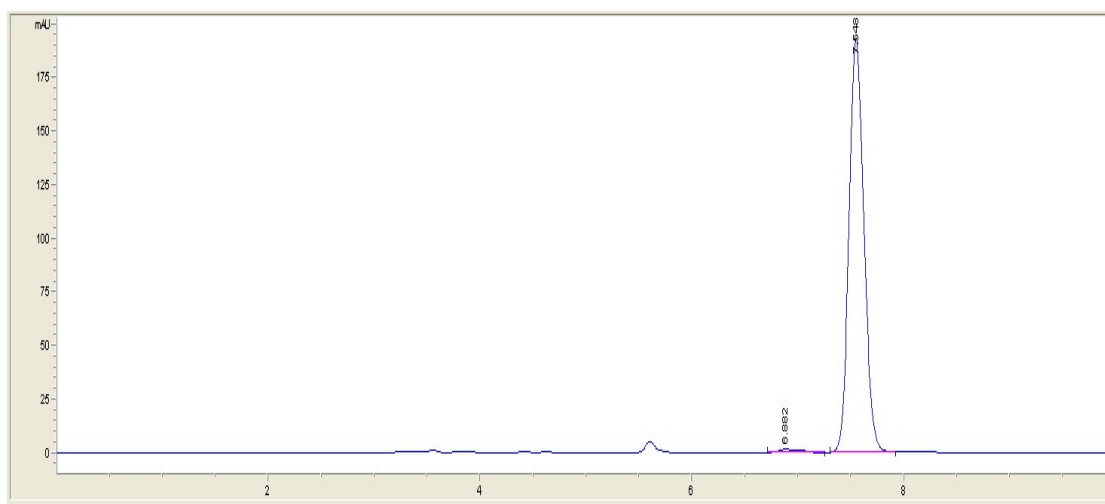

| Peak # | RetTime [min] | Area [mAU*s] | Height [mAU] | Width [min] | Symmetry [%] | Area [%] |
|--------|---------------|--------------|--------------|-------------|--------------|----------|
| 1      | 6.882         | 22           | 1.6          | 0.1921      | 0.405        | 1.151    |
| 2      | 7.548         | 1887         | 193.3        | 0.1519      | 0.849        | 98.849   |

**Figure S282. HPLC Spectra of 38**

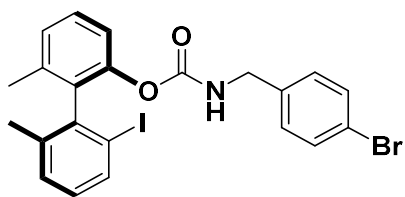

39

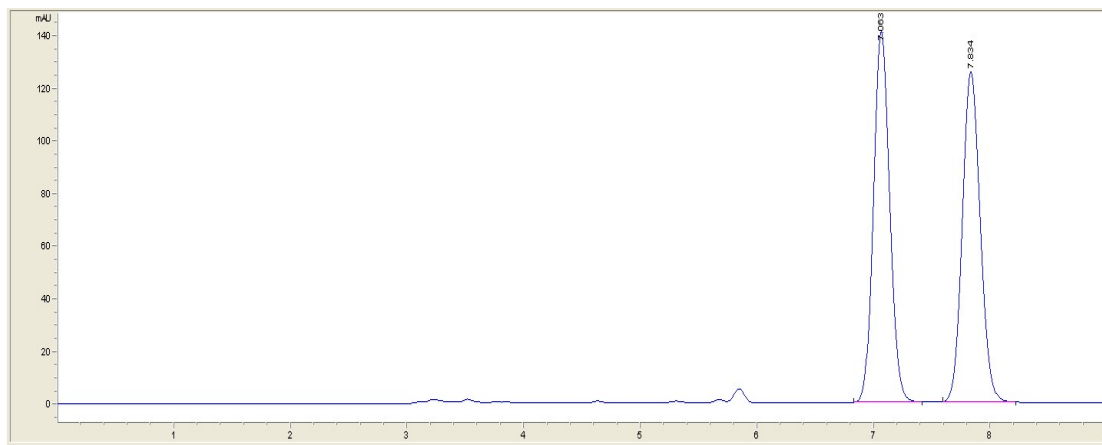

| Peak # | RetTime [min] | Area [mAU*s] | Height [mAU] | Width [min] | Symmetry | Area [%] |
|--------|---------------|--------------|--------------|-------------|----------|----------|
| 1      | 7.063         | 1374.6       | 141.1        | 0.1516      | 0.869    | 50.260   |
| 2      | 7.834         | 1360.3       | 125.6        | 0.1683      | 0.868    | 49.740   |

Figure S283. HPLC Spectra of racemic 39

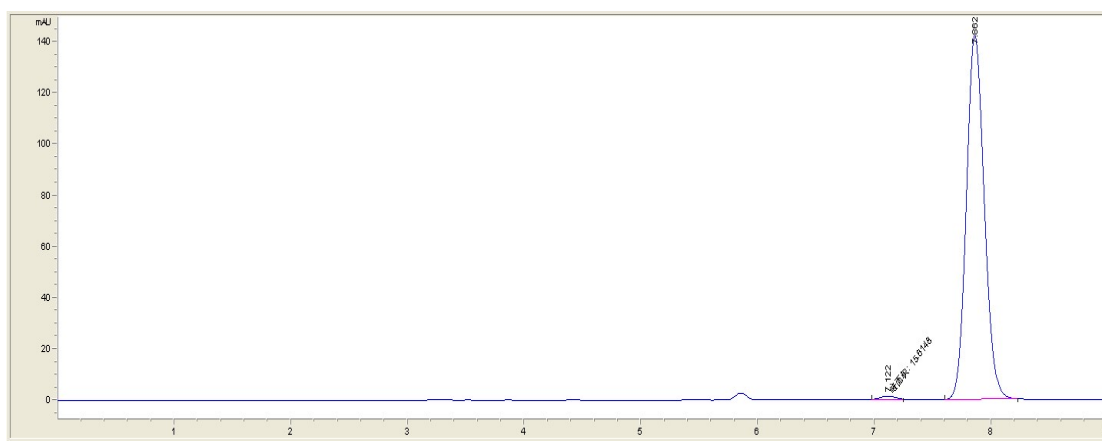

| Peak # | RetTime [min] | Area [mAU*s] | Height [mAU] | Width [min] | Symmetry | Area [%] |
|--------|---------------|--------------|--------------|-------------|----------|----------|
| 1      | 7.122         | 15.6         | 1.5          | 0.172       | 0.726    | 1.008    |
| 2      | 7.862         | 1533         | 142.4        | 0.1676      | 0.859    | 98.992   |

Figure S284. HPLC Spectra of 39

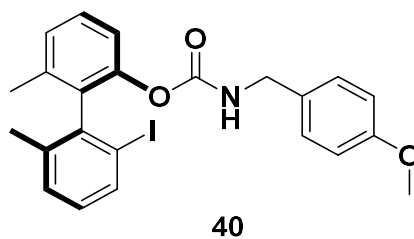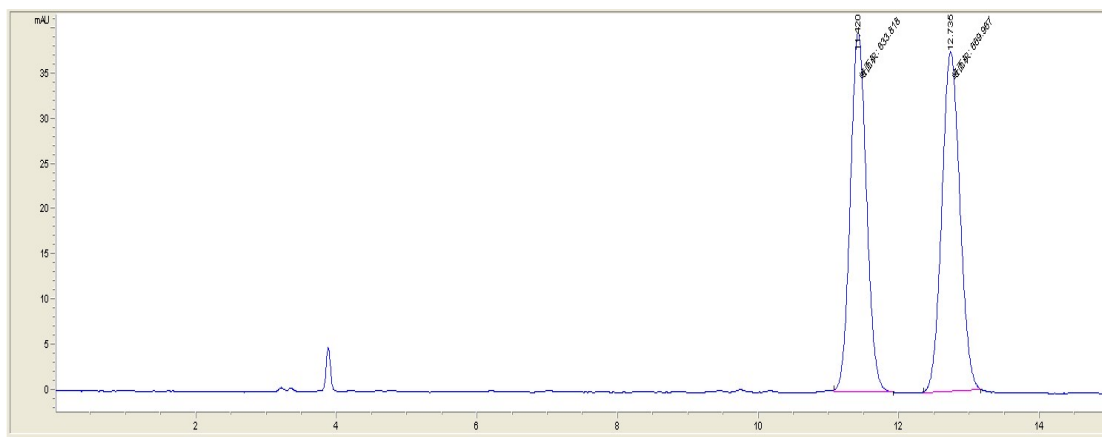

| Peak # | RetTime [min] | Area [mAU*s] | Height [mAU] | Width [min] | Symmetry [%] | Area [%] |
|--------|---------------|--------------|--------------|-------------|--------------|----------|
| 1      | 11.42         | 633.8        | 39.7         | 0.2659      | 0.919        | 48.614   |
| 2      | 12.735        | 670          | 37.5         | 0.2378      | 0.924        | 51.386   |

**Figure S285. HPLC Spectra of racemic 40**

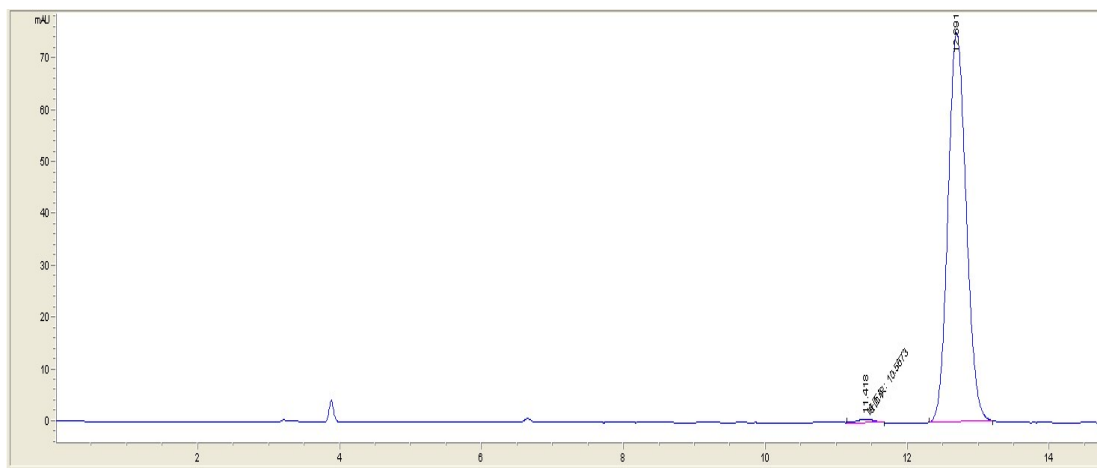

| Peak # | RetTime [min] | Area [mAU*s] | Height [mAU] | Width [min] | Symmetry [%] | Area [%] |
|--------|---------------|--------------|--------------|-------------|--------------|----------|
| 1      | 11.418        | 10.6         | 6.9E-1       | 0.2541      | 1.425        | 0.782    |
| 2      | 12.691        | 1341         | 75.2         | 0.2781      | 0.865        | 99.218   |

**Supplementary Figure 286. HPLC Spectra of 40**

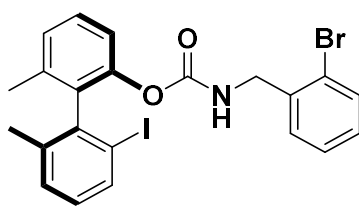

41

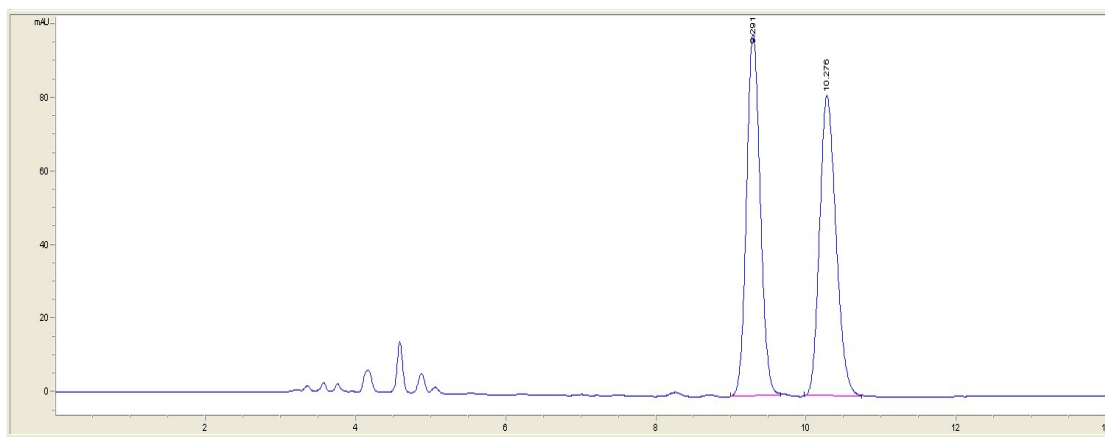

| Peak # | RetTime [min] | Area [mAU*s] | Height [mAU] | Width [min] | Symmetry [%] | Area [%] |
|--------|---------------|--------------|--------------|-------------|--------------|----------|
| 1      | 9.291         | 1253.8       | 98.4         | 0.1987      | 0.861        | 50.249   |
| 2      | 10.276        | 1241.4       | 81.7         | 0.2333      | 0.775        | 49.751   |

Figure S287. HPLC Spectra of racemic 41

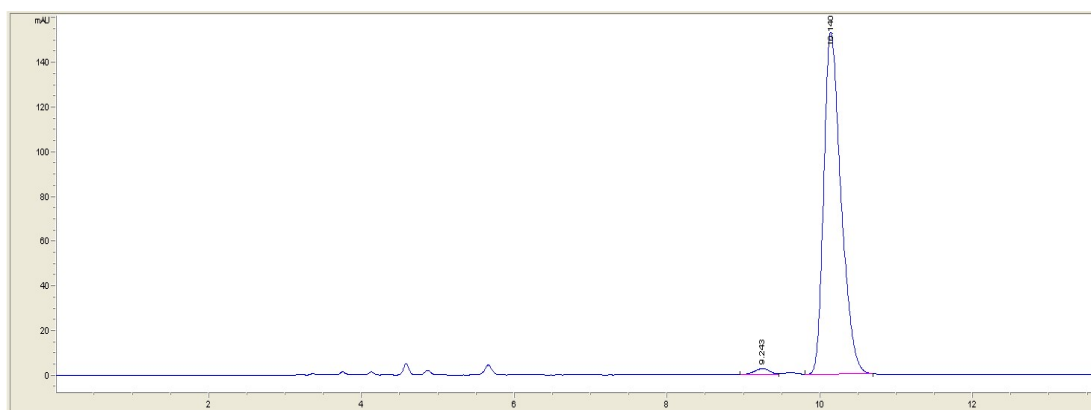

| Peak # | RetTime [min] | Area [mAU*s] | Height [mAU] | Width [min] | Symmetry [%] | Area [%] |
|--------|---------------|--------------|--------------|-------------|--------------|----------|
| 1      | 9.243         | 38.7         | 2.7          | 0.2128      | 1.055        | 1.581    |
| 2      | 10.14         | 2408.3       | 153          | 0.2376      | 0.65         | 98.419   |

Figure S288. HPLC Spectra of 41

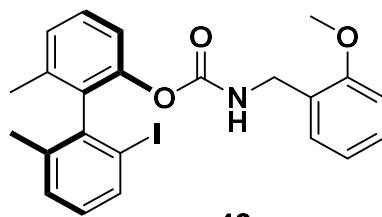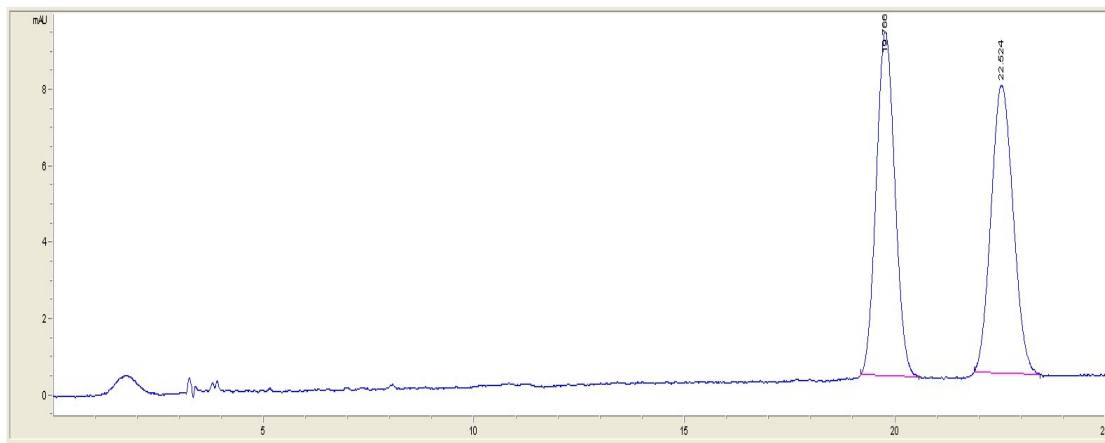

| Peak # | RetTime [min] | Area [mAU*s] | Height [mAU] | Width [min] | Symmetry | Area [%] |
|--------|---------------|--------------|--------------|-------------|----------|----------|
| 1      | 19.766        | 279.1        | 9            | 0.4613      | 0.907    | 50.253   |
| 2      | 22.524        | 276.2        | 7.5          | 0.5137      | 0.844    | 49.747   |

**Figure S289. HPLC Spectra of racemic 42**

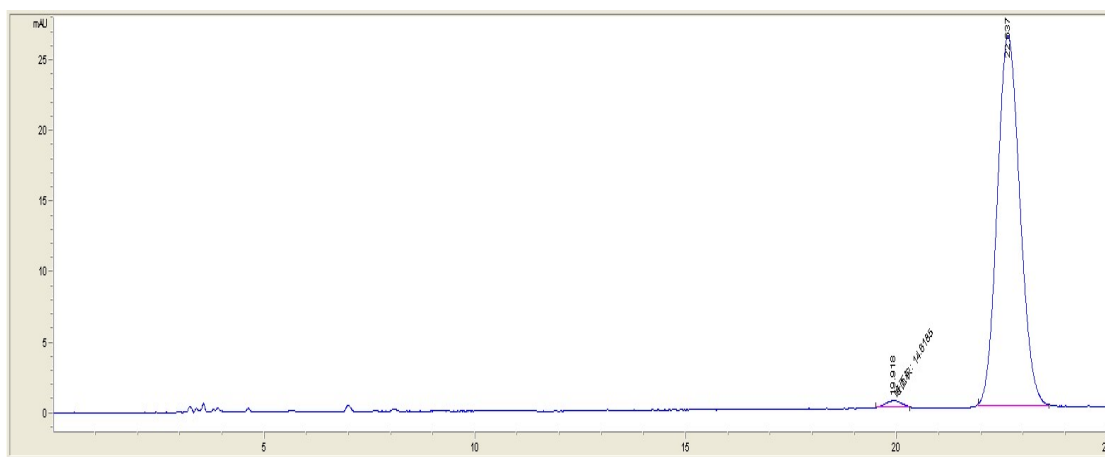

| Peak # | RetTime [min] | Area [mAU*s] | Height [mAU] | Width [min] | Symmetry | Area [%] |
|--------|---------------|--------------|--------------|-------------|----------|----------|
| 1      | 19.918        | 14.6         | 5.2E-1       | 0.4719      | 0.902    | 1.470    |
| 2      | 22.637        | 979.6        | 26.2         | 0.582       | 0.861    | 98.530   |

**Figure S290 HPLC Spectra of 42**

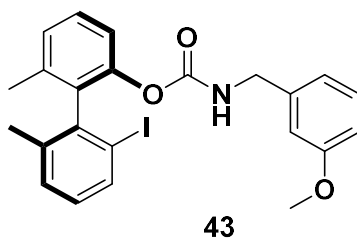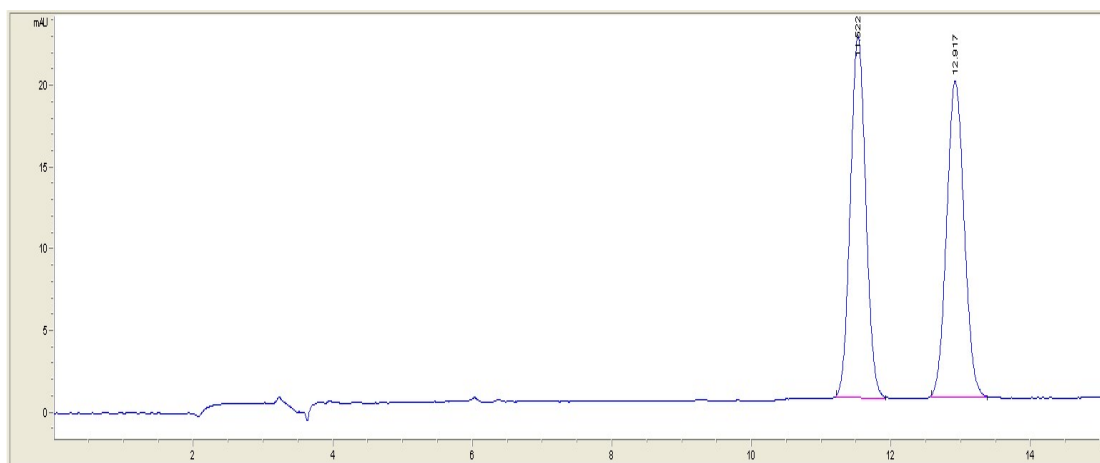

| Peak # | RetTime [min] | Area [mAU*s] | Height [mAU] | Width [min] | Symmetry | Area [%] |
|--------|---------------|--------------|--------------|-------------|----------|----------|
| 1      | 11.522        | 340.8        | 22.2         | 0.2388      | 0.924    | 49.996   |
| 2      | 12.917        | 340.9        | 19.4         | 0.2708      | 0.916    | 50.004   |

**Figure S291. HPLC Spectra of racemic 43**

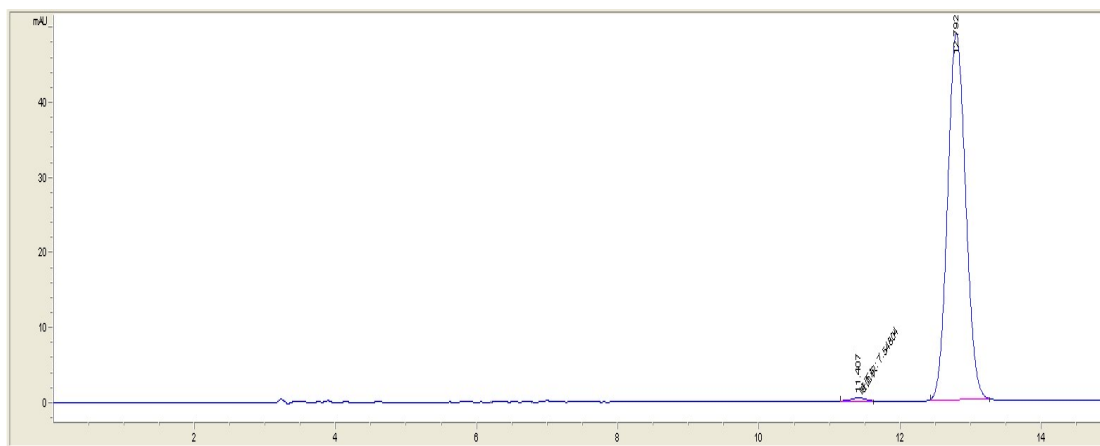

| Peak # | RetTime [min] | Area [mAU*s] | Height [mAU] | Width [min] | Symmetry | Area [%] |
|--------|---------------|--------------|--------------|-------------|----------|----------|
| 1      | 11.407        | 7.5          | 4.9E-1       | 0.2552      | 1.088    | 0.863    |
| 2      | 12.792        | 866.7        | 49           | 0.2765      | 0.894    | 99.137   |

**Figure S292. HPLC Spectra of 43**

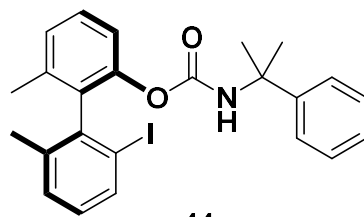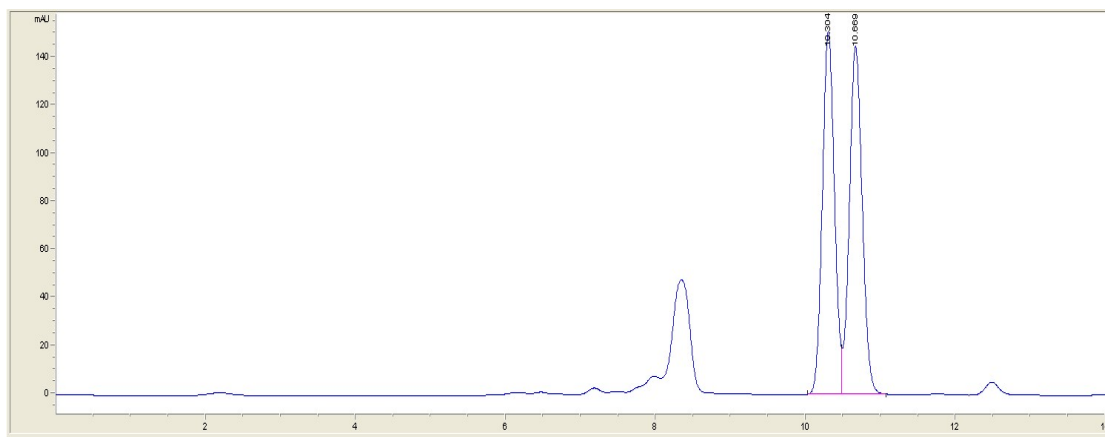

| Peak # | RetTime [min] | Area [mAU*s] | Height [mAU] | Width [min] | Symmetry [%] | Area [%] |
|--------|---------------|--------------|--------------|-------------|--------------|----------|
| 1      | 10.304        | 1699.1       | 150.9        | 0.1733      | 0.912        | 49.572   |
| 2      | 10.669        | 1728.5       | 145          | 0.1851      | 0.896        | 50.428   |

**Figure S293.** HPLC Spectra of racemic **44**

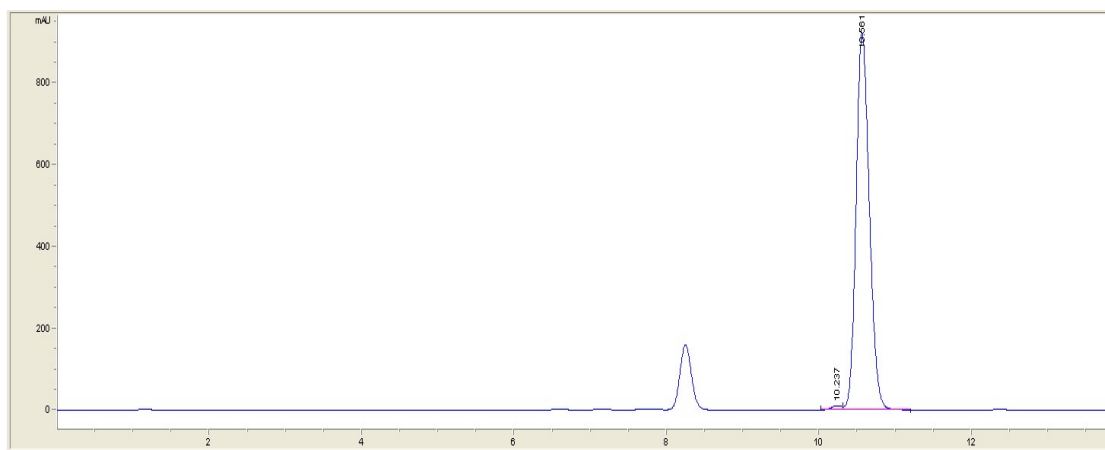

| Peak # | RetTime [min] | Area [mAU*s] | Height [mAU] | Width [min] | Symmetry [%] | Area [%] |
|--------|---------------|--------------|--------------|-------------|--------------|----------|
| 1      | 10.237        | 102.4        | 11           | 0.1451      | 1.349        | 0.910    |
| 2      | 10.561        | 11151.2      | 921.4        | 0.1872      | 0.775        | 99.090   |

**Figure S294.** HPLC Spectra of **44**



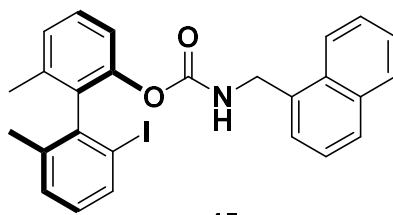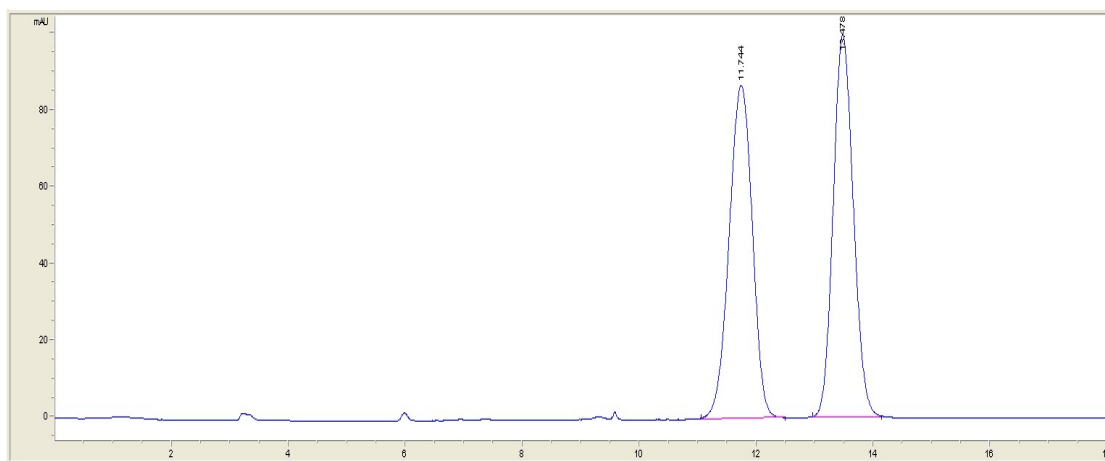

| Peak # | RetTime [min] | Area [mAU*s] | Height [mAU] | Width [min] | Symmetry | Area [%] |
|--------|---------------|--------------|--------------|-------------|----------|----------|
| 1      | 11.744        | 2398.4       | 86.8         | 0.4365      | 1.069    | 50.077   |
| 2      | 13.478        | 2391         | 99.5         | 0.3742      | 0.858    | 49.923   |

**Figure S295. HPLC Spectra of racemic 45**

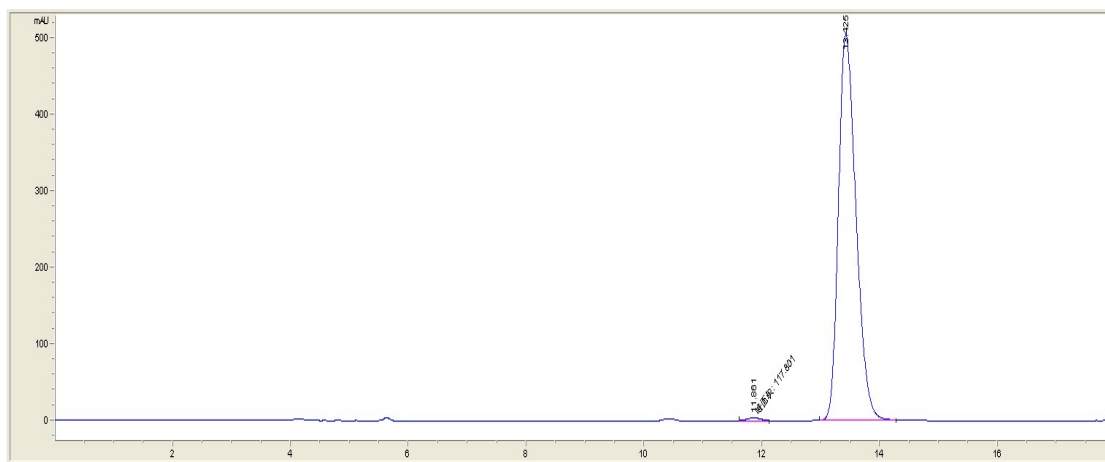

| Peak # | RetTime [min] | Area [mAU*s] | Height [mAU] | Width [min] | Symmetry | Area [%] |
|--------|---------------|--------------|--------------|-------------|----------|----------|
| 1      | 11.861        | 117.8        | 5.7          | 0.3456      | 0.928    | 1.114    |
| 2      | 13.425        | 10459.7      | 504.9        | 0.3197      | 0.689    | 98.886   |

**Figure S296. HPLC Spectra of 45**

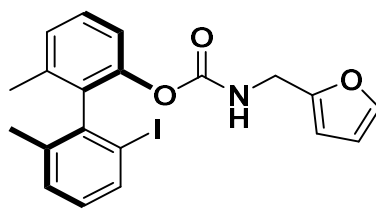

46

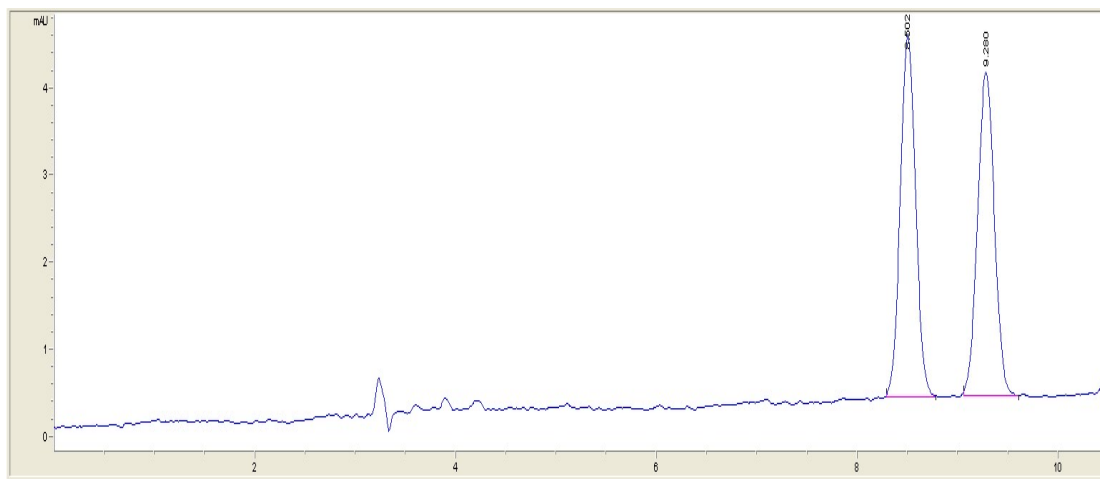

| Peak # | RetTime [min] | Area [mAU*s] | Height [mAU] | Width [min] | Symmetry [%] | Area [%] |
|--------|---------------|--------------|--------------|-------------|--------------|----------|
| 1      | 8.502         | 44.2         | 4.2          | 0.1656      | 0.948        | 50.409   |
| 2      | 9.28          | 43.5         | 3.7          | 0.1845      | 0.966        | 49.591   |

Figure S297. HPLC Spectra of racemic 46

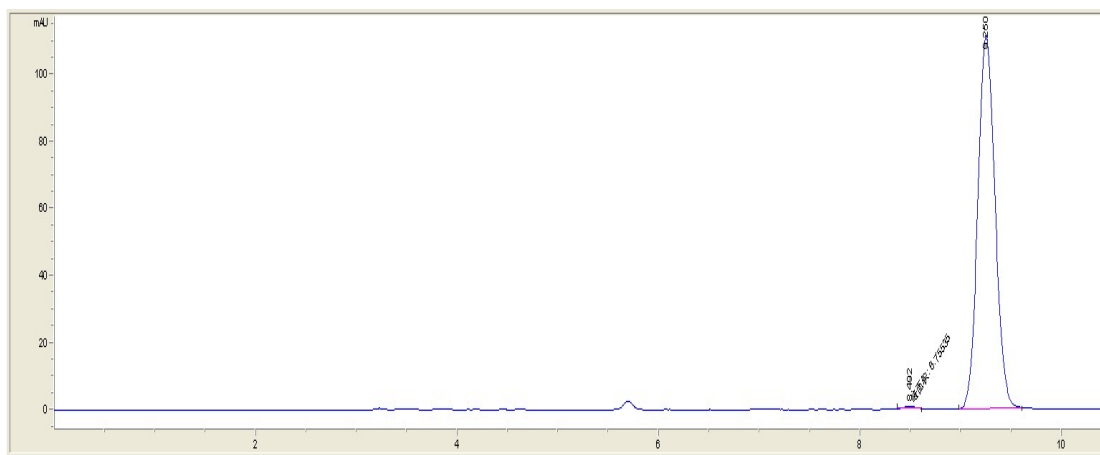

| Peak # | RetTime [min] | Area [mAU*s] | Height [mAU] | Width [min] | Symmetry [%] | Area [%] |
|--------|---------------|--------------|--------------|-------------|--------------|----------|
| 1      | 8.492         | 6.8          | 7.8E-1       | 0.1448      | 0.879        | 0.507    |
| 2      | 9.25          | 1325.2       | 111.8        | 0.1843      | 0.868        | 99.493   |

Figure S298. HPLC Spectra of 46

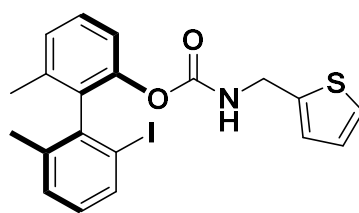

47

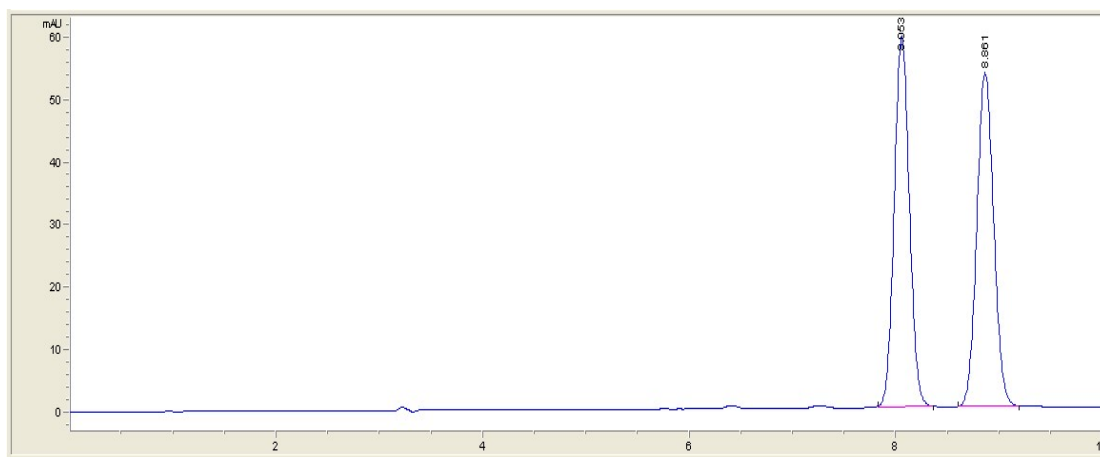

| Peak # | RetTime [min] | Area [mAU*s] | Height [mAU] | Width [min] | Symmetry | Area [%] |
|--------|---------------|--------------|--------------|-------------|----------|----------|
| 1      | 8.053         | 605.3        | 59.4         | 0.159       | 0.918    | 50.008   |
| 2      | 8.861         | 605.1        | 53.4         | 0.1783      | 0.916    | 49.992   |

Figure S299. HPLC Spectra of racemic 47

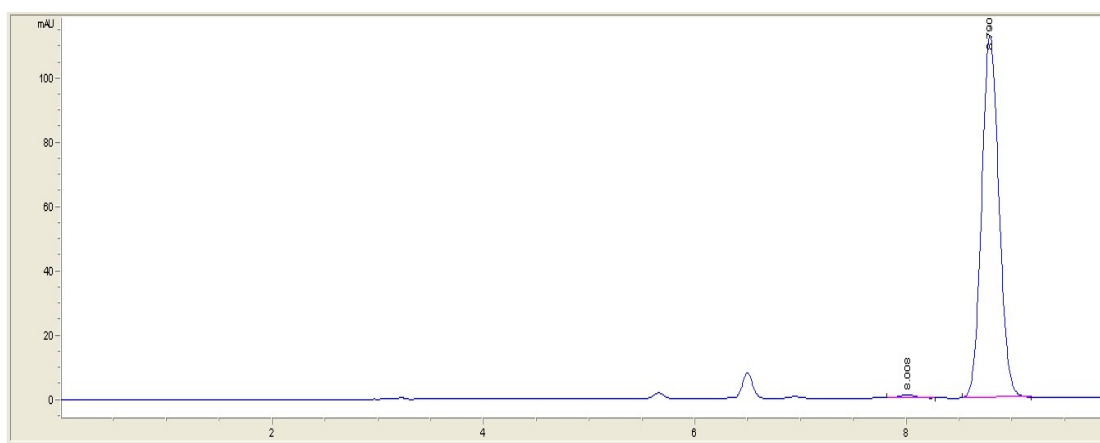

| Peak # | RetTime [min] | Area [mAU*s] | Height [mAU] | Width [min] | Symmetry | Area [%] |
|--------|---------------|--------------|--------------|-------------|----------|----------|
| 1      | 8.008         | 10.3         | 1.1          | 0.1539      | 1.018    | 0.799    |
| 2      | 8.79          | 1274.7       | 112.6        | 0.1781      | 0.894    | 99.201   |

Figure S300 HPLC Spectra of 47

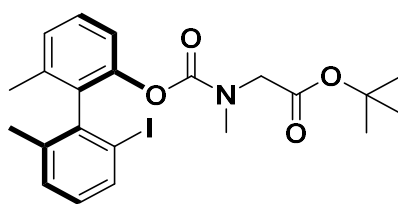

48

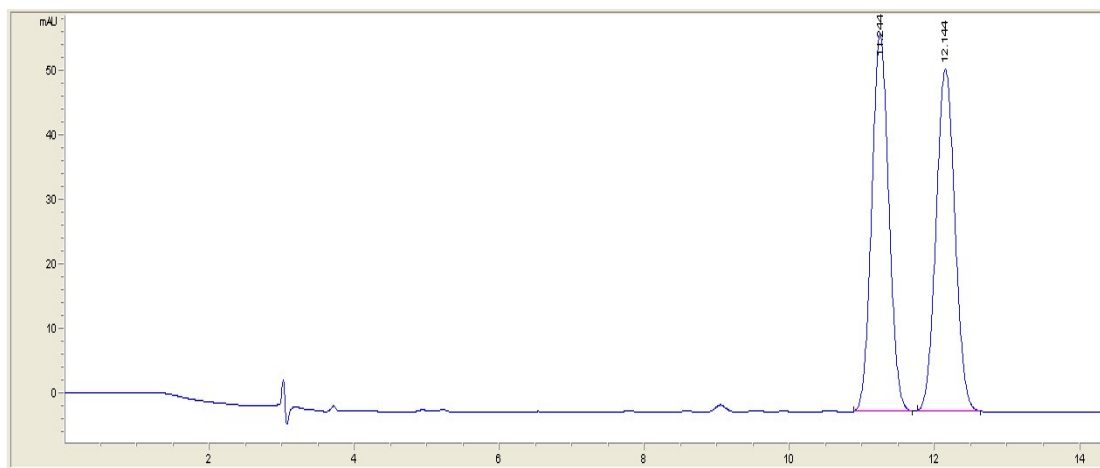

| Peak # | RetTime [min] | Area [mAU*s] | Height [mAU] | Width [min] | Symmetry | Area [%] |
|--------|---------------|--------------|--------------|-------------|----------|----------|
| 1      | 11.244        | 963          | 58.5         | 0.2559      | 0.926    | 50.019   |
| 2      | 12.144        | 962.3        | 53.2         | 0.2831      | 0.936    | 49.981   |

Figure S301. HPLC Spectra of racemic 48

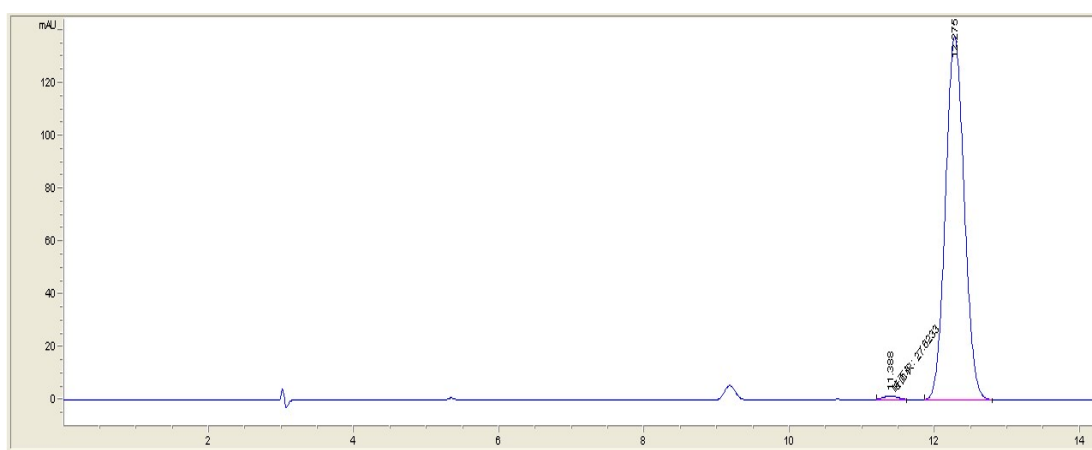

| Peak # | RetTime [min] | Area [mAU*s] | Height [mAU] | Width [min] | Symmetry | Area [%] |
|--------|---------------|--------------|--------------|-------------|----------|----------|
| 1      | 11.398        | 27.6         | 1.8          | 0.258       | 1.065    | 1.103    |
| 2      | 12.275        | 2477.9       | 137.5        | 0.2823      | 0.918    | 98.897   |

Figure S302. HPLC Spectra of 48

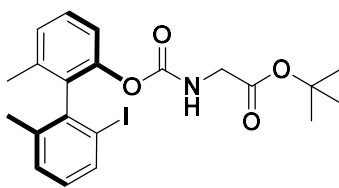

49

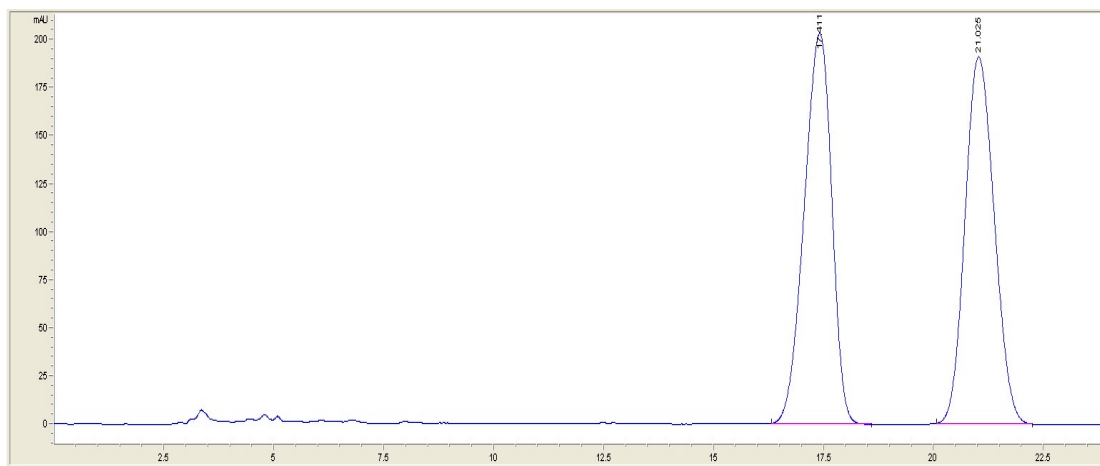

| Peak # | RetTime [min] | Area [mAU*s] | Height [mAU] | Width [min] | Symmetry | Area [%] |
|--------|---------------|--------------|--------------|-------------|----------|----------|
| 1      | 17.411        | 8864         | 203.3        | 0.6868      | 1.267    | 50.055   |
| 2      | 21.025        | 8844.6       | 191.1        | 0.7239      | 0.847    | 49.945   |

Figure S303. HPLC Spectra of racemic 49

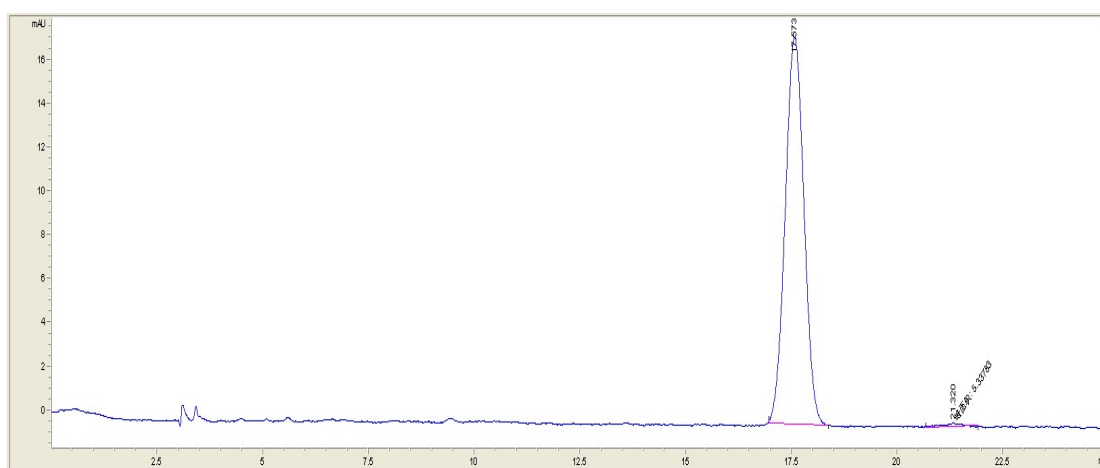

| Peak # | RetTime [min] | Area [mAU*s] | Height [mAU] | Width [min] | Symmetry | Area [%] |
|--------|---------------|--------------|--------------|-------------|----------|----------|
| 1      | 17.573        | 546.7        | 17.7         | 0.4749      | 0.961    | 99.033   |
| 2      | 21.32         | 5.3          | 1.7E-1       | 0.5362      | 1.341    | 0.967    |

Figure S304. HPLC Spectra of 49

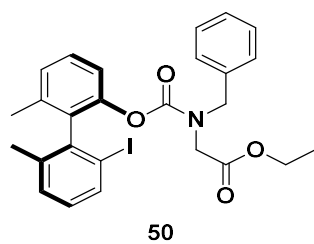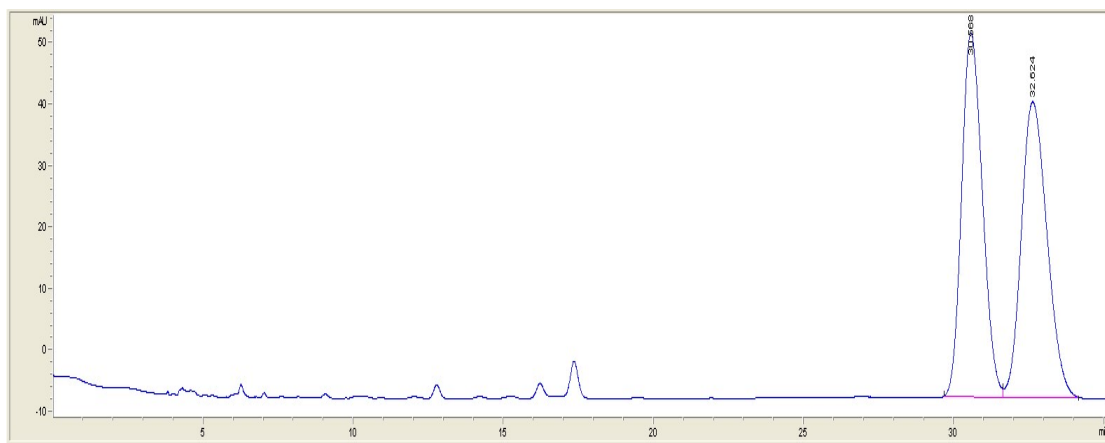

| Peak # | RetTime [min] | Area [mAU*s] | Height [mAU] | Width [min] | Symmetry | Area [%] |
|--------|---------------|--------------|--------------|-------------|----------|----------|
| 1      | 30.568        | 2865         | 59.3         | 0.7554      | 0.782    | 49.951   |
| 2      | 32.624        | 2870.6       | 48.2         | 0.9129      | 0.761    | 50.049   |

**Figure S305. HPLC Spectra of racemic 50**

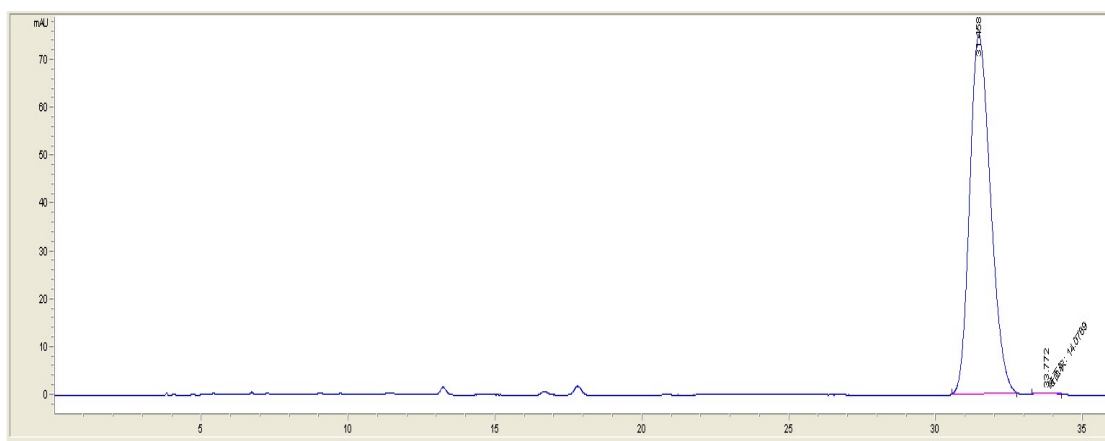

| Peak # | RetTime [min] | Area [mAU*s] | Height [mAU] | Width [min] | Symmetry | Area [%] |
|--------|---------------|--------------|--------------|-------------|----------|----------|
| 1      | 31.458        | 3728.6       | 75.3         | 0.7618      | 0.744    | 99.624   |
| 2      | 33.772        | 14.1         | 3.6E-1       | 0.6445      | 1.218    | 0.376    |

**Figure S306. HPLC Spectra of 50**

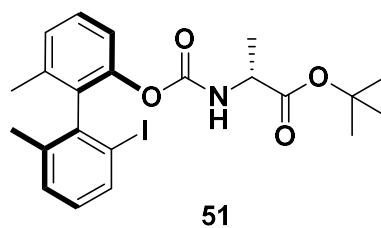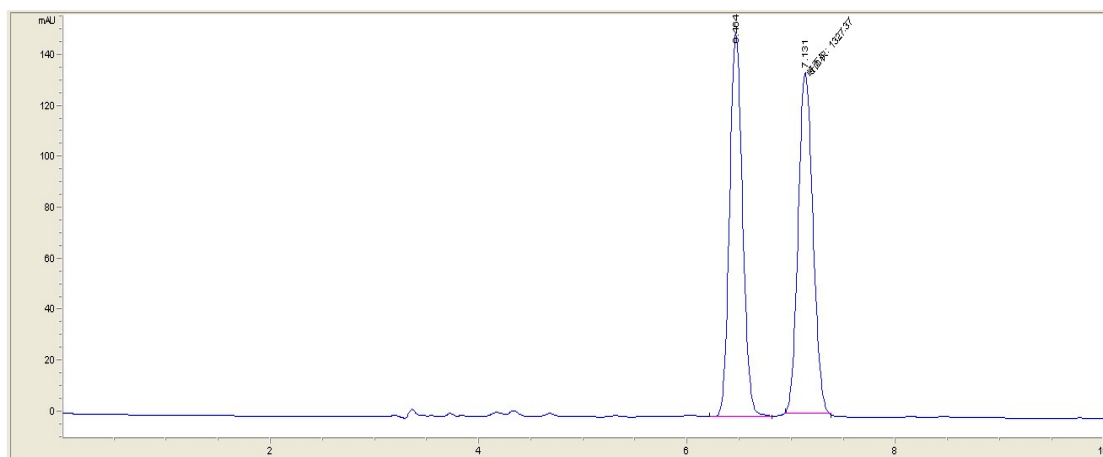

| Peak # | RetTime [min] | Area [mAU*s] | Height [mAU] | Width [min] | Symmetry | Area [%] |
|--------|---------------|--------------|--------------|-------------|----------|----------|
| 1      | 6.464         | 1305         | 150.3        | 0.1353      | 0.859    | 49.575   |
| 2      | 7.131         | 1327.4       | 134.3        | 0.1647      | 0.888    | 50.425   |

**Figure S307. HPLC Spectra of racemic 51**

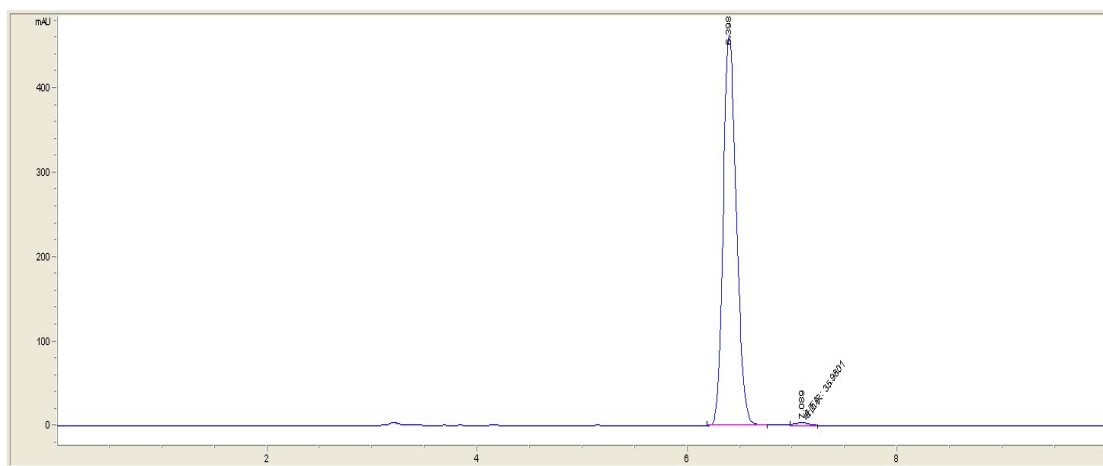

| Peak # | RetTime [min] | Area [mAU*s] | Height [mAU] | Width [min] | Symmetry | Area [%] |
|--------|---------------|--------------|--------------|-------------|----------|----------|
| 1      | 6.398         | 4036.6       | 462.5        | 0.1358      | 0.772    | 99.117   |
| 2      | 7.089         | 36           | 3.8          | 0.1592      | 0.859    | 0.883    |

**Figure S308. HPLC Spectra of 51**

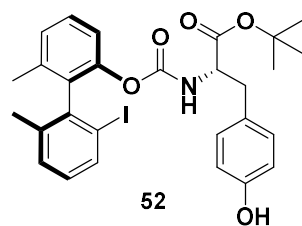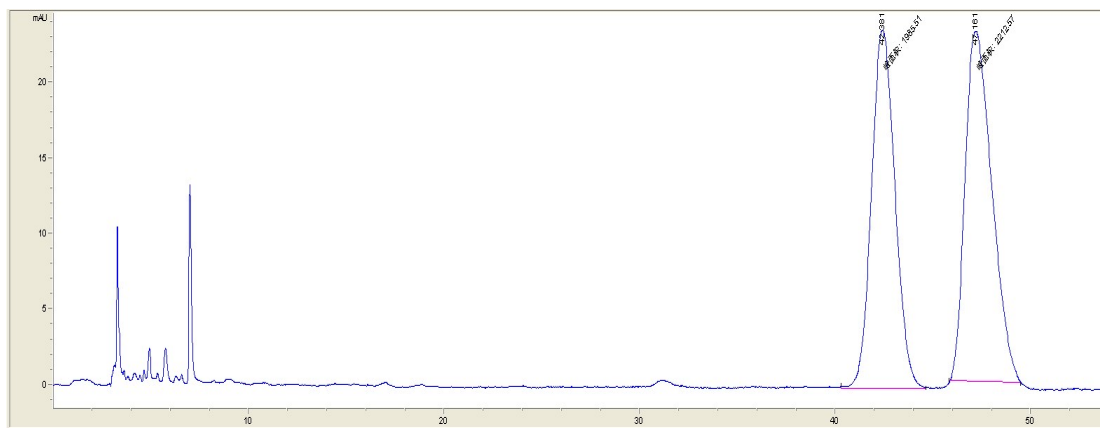

| Peak # | RetTime [min] | Area [mAU*s] | Height [mAU] | Width [min] | Symmetry [%] | Area [%] |
|--------|---------------|--------------|--------------|-------------|--------------|----------|
| 1      | 42.381        | 1985.5       | 23.7         | 1.3965      | 0.814        | 47.296   |
| 2      | 47.161        | 2212.6       | 23.2         | 1.5909      | 0.628        | 52.704   |

**Figure S309. HPLC Spectra of racemic 52**

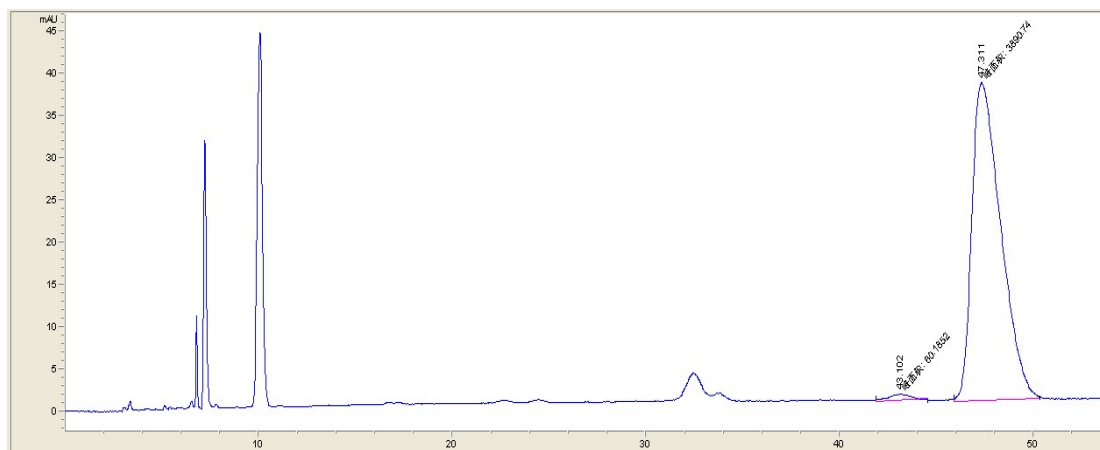

| Peak # | RetTime [min] | Area [mAU*s] | Height [mAU] | Width [min] | Symmetry [%] | Area [%] |
|--------|---------------|--------------|--------------|-------------|--------------|----------|
| 1      | 43.102        | 60.2         | 7.7E-1       | 1.3036      | 1.253        | 1.523    |
| 2      | 47.311        | 3890.7       | 37.7         | 1.7218      | 0.492        | 98.477   |

**Figure S310 HPLC Spectra of 52**



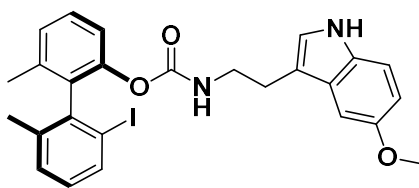

53

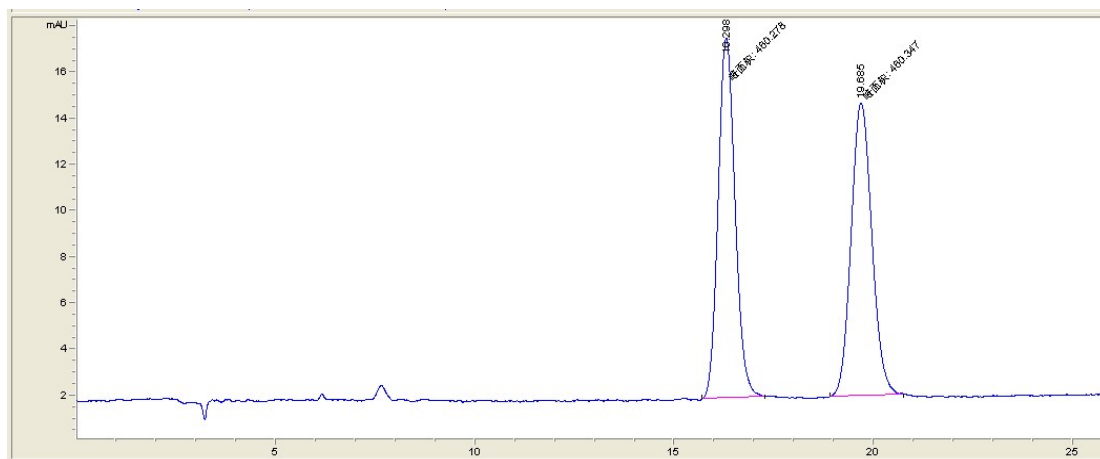

| Peak # | RetTime [min] | Area [mAU*s] | Height [mAU] | Width [min] | Symmetry [%] | Area [%] |
|--------|---------------|--------------|--------------|-------------|--------------|----------|
| 1      | 16.298        | 460.3        | 15.6         | 0.4922      | 0.864        | 49.996   |
| 2      | 19.685        | 460.3        | 12.7         | 0.6048      | 0.895        | 50.004   |

Figure S311. HPLC Spectra of racemic 53

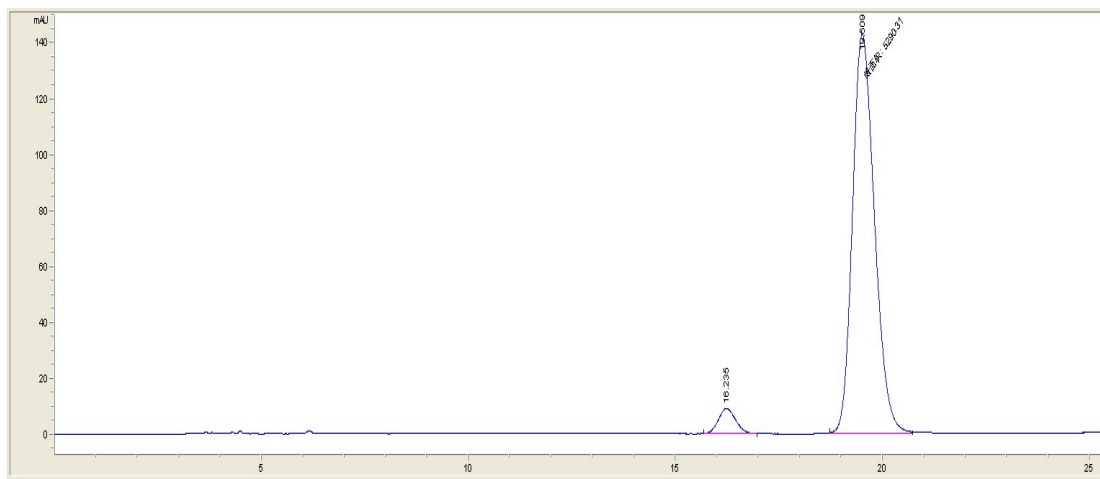

| Peak # | RetTime [min] | Area [mAU*s] | Height [mAU] | Width [min] | Symmetry [%] | Area [%] |
|--------|---------------|--------------|--------------|-------------|--------------|----------|
| 1      | 16.235        | 260.5        | 9            | 0.4456      | 0.876        | 4.693    |
| 2      | 19.509        | 5290.3       | 143          | 0.6166      | 0.765        | 95.307   |

Figure S312. HPLC Spectra of 53

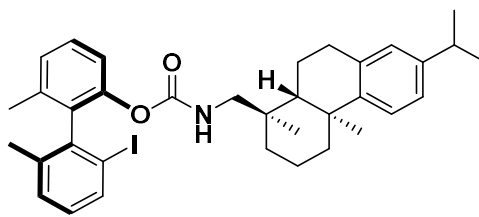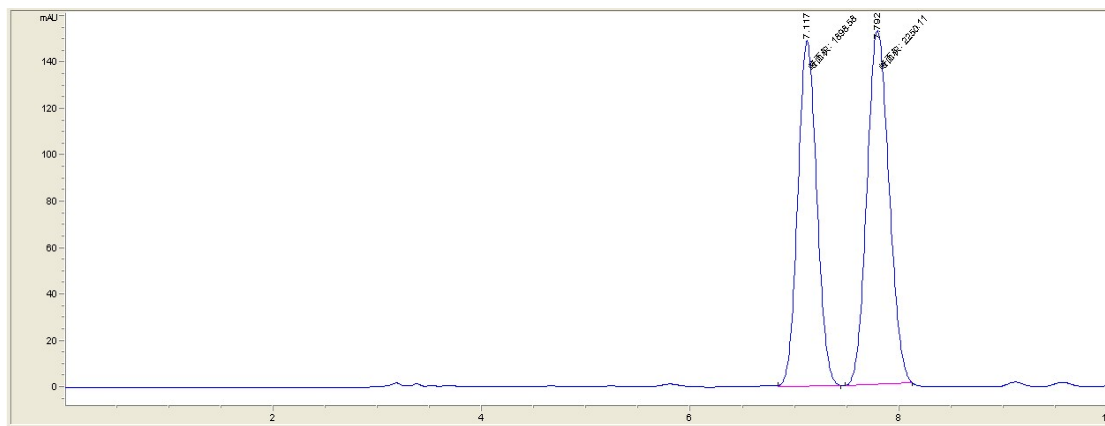

| Peak # | RetTime [min] | Area [mAU*s] | Height [mAU] | Width [min] | Symmetry | Area [%] |
|--------|---------------|--------------|--------------|-------------|----------|----------|
| 1      | 7.117         | 1898.6       | 149.3        | 0.2119      | 0.916    | 45.763   |
| 2      | 7.792         | 2250.1       | 152.7        | 0.2455      | 0.885    | 54.237   |

**Figure S313. HPLC Spectra of racemic 54**

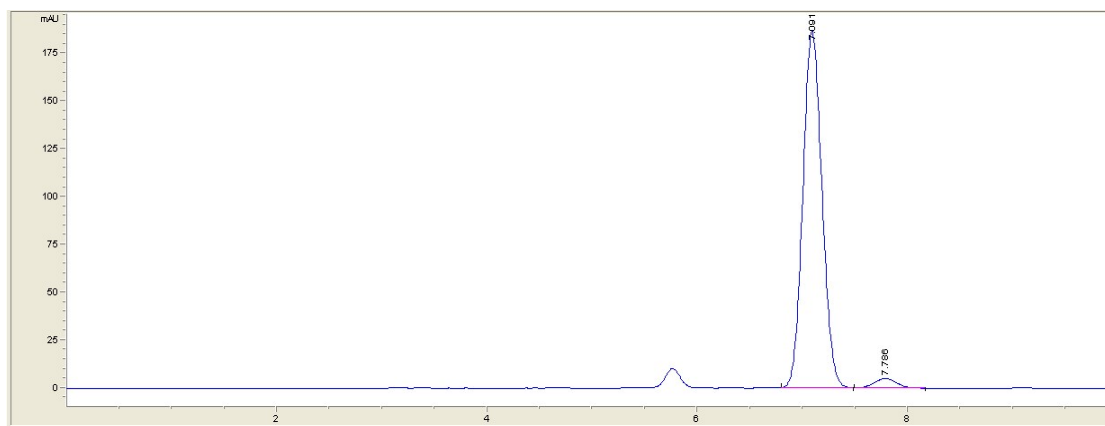

| Peak # | RetTime [min] | Area [mAU*s] | Height [mAU] | Width [min] | Symmetry | Area [%] |
|--------|---------------|--------------|--------------|-------------|----------|----------|
| 1      | 7.091         | 2354.1       | 186.5        | 0.1952      | 0.887    | 96.996   |
| 2      | 7.786         | 72.9         | 4.9          | 0.2304      | 0.967    | 3.004    |

**Figure S314. HPLC Spectra of 54**

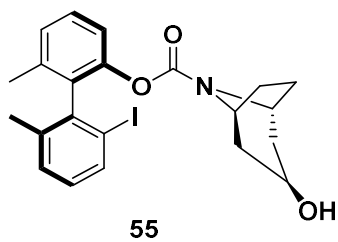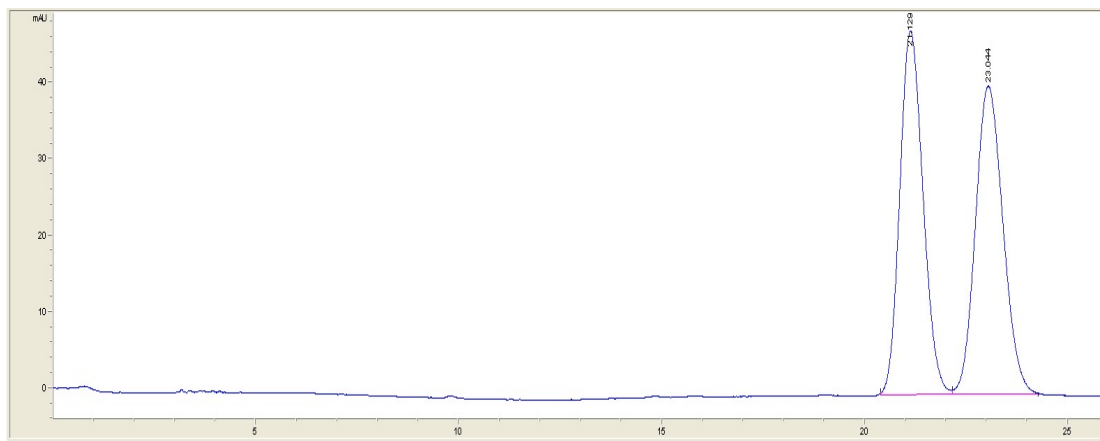

| Peak # | RetTime [min] | Area [mAU*s] | Height [mAU] | Width [min] | Symmetry | Area [%] |
|--------|---------------|--------------|--------------|-------------|----------|----------|
| 1      | 21.129        | 1901.4       | 47.7         | 0.6155      | 0.811    | 49.890   |
| 2      | 23.044        | 1909.8       | 40.4         | 0.7277      | 0.835    | 50.110   |

**Figure S315.** HPLC Spectra of racemic **55**

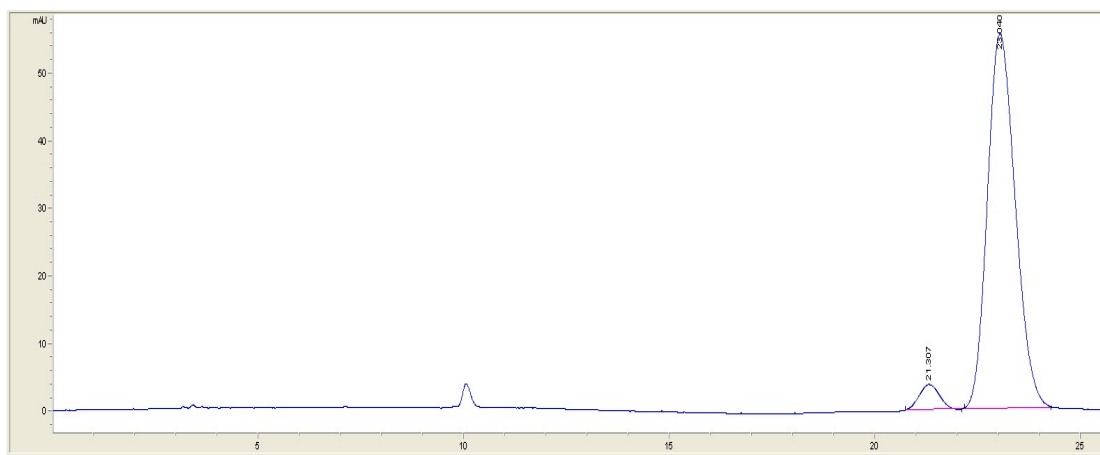

| Peak # | RetTime [min] | Area [mAU*s] | Height [mAU] | Width [min] | Symmetry | Area [%] |
|--------|---------------|--------------|--------------|-------------|----------|----------|
| 1      | 21.307        | 126          | 3.7          | 0.4121      | 0.874    | 4.592    |
| 2      | 23.04         | 2618         | 55.4         | 0.7271      | 0.794    | 95.408   |

**Figure S316.** HPLC Spectra of **55**

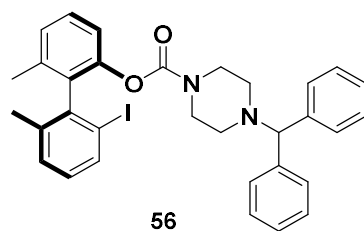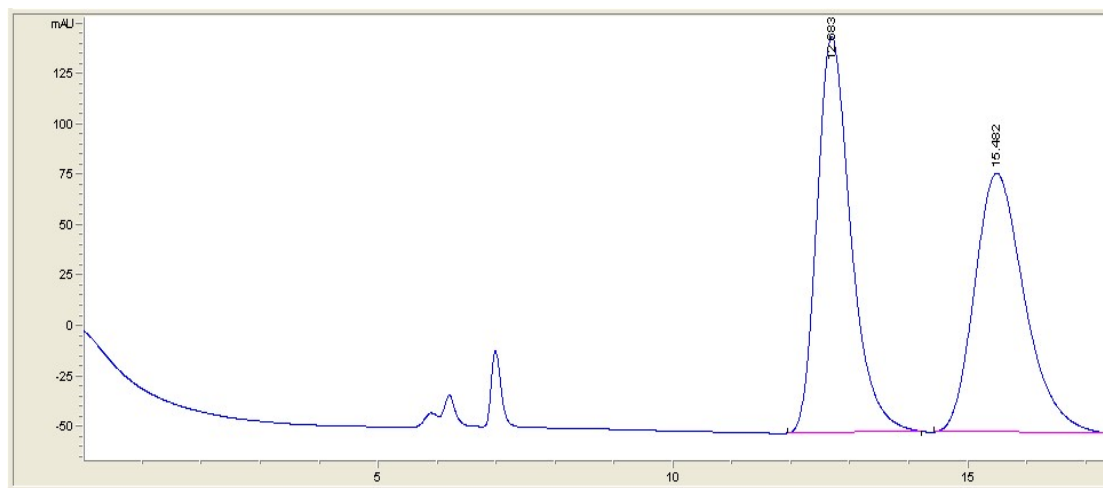

| Peak # | RetTime [min] | Area [mAU*s] | Height [mAU] | Width [min] | Symmetry | Area [%] |
|--------|---------------|--------------|--------------|-------------|----------|----------|
| 1      | 12.683        | 7871.5       | 196.5        | 0.6115      | 0.718    | 50.925   |
| 2      | 15.482        | 7585.6       | 128.7        | 0.8857      | 0.75     | 49.075   |

**Figure S317. HPLC Spectra of racemic 56**

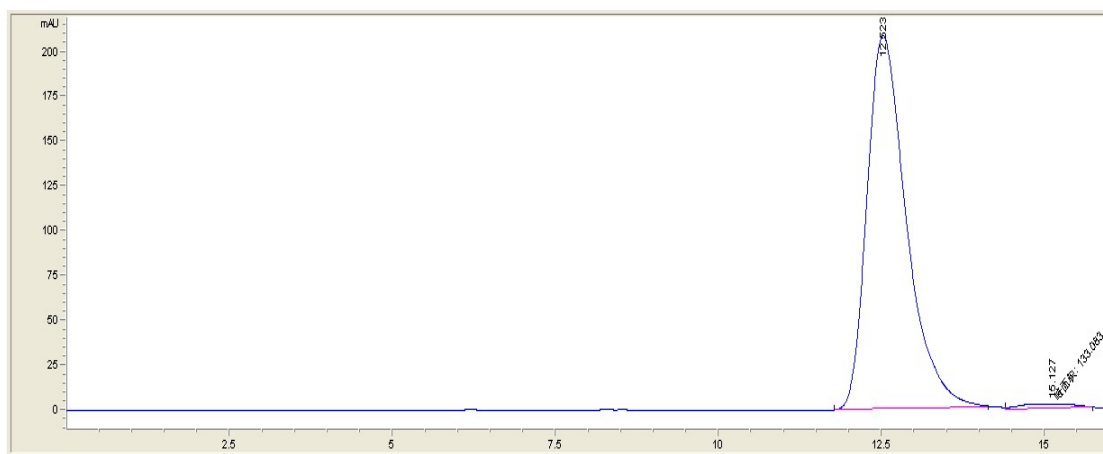

| Peak # | RetTime [min] | Area [mAU*s] | Height [mAU] | Width [min] | Symmetry | Area [%] |
|--------|---------------|--------------|--------------|-------------|----------|----------|
| 1      | 12.523        | 8785.8       | 208.4        | 0.6458      | 0.645    | 98.508   |
| 2      | 15.127        | 133.1        | 2.3          | 0.9475      | 1.673    | 1.492    |

**Figure S318. HPLC Spectra of 56**

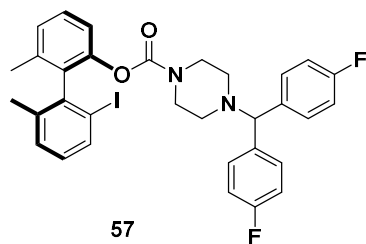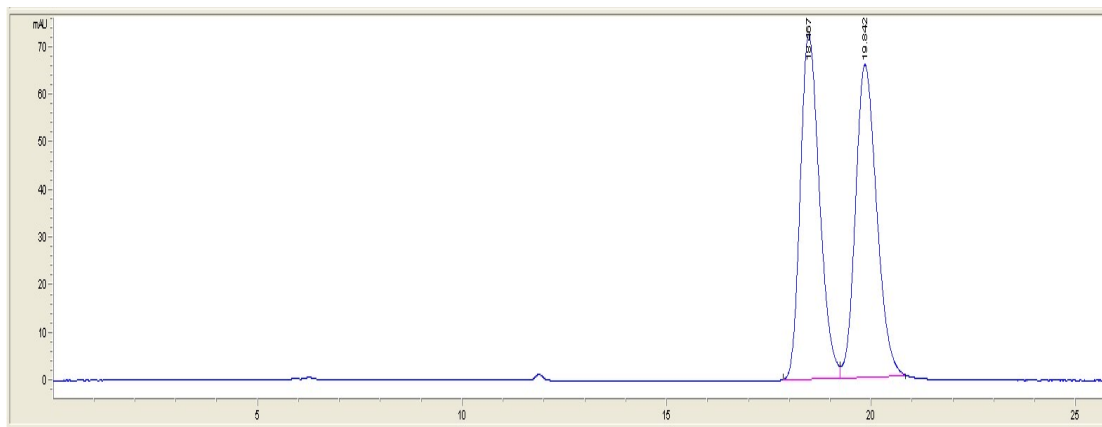

| Peak # | RetTime [min] | Area [mAU*s] | Height [mAU] | Width [min] | Symmetry | Area [%] |
|--------|---------------|--------------|--------------|-------------|----------|----------|
| 1      | 18.467        | 2366.5       | 72.5         | 0.507       | 0.743    | 49.865   |
| 2      | 19.842        | 2379.3       | 65.8         | 0.5536      | 0.773    | 50.135   |

**Figure S319. HPLC Spectra of racemic 57**

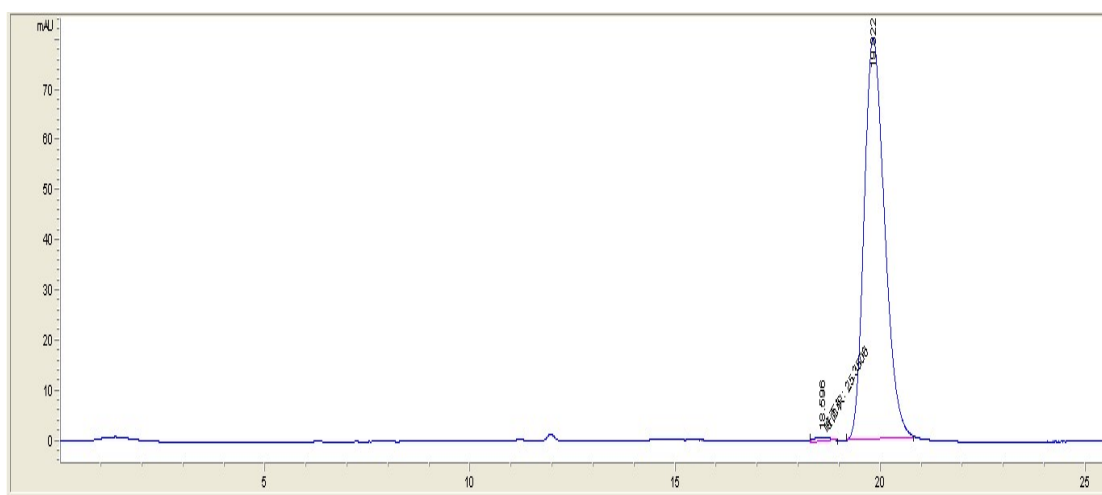

| Peak # | RetTime [min] | Area [mAU*s] | Height [mAU] | Width [min] | Symmetry | Area [%] |
|--------|---------------|--------------|--------------|-------------|----------|----------|
| 1      | 18.596        | 25.4         | 9.5E-1       | 0.3274      | 1.169    | 0.900    |
| 2      | 19.822        | 2791.8       | 80.2         | 0.5401      | 0.743    | 99.100   |

**Figure S320 HPLC Spectra of 57**

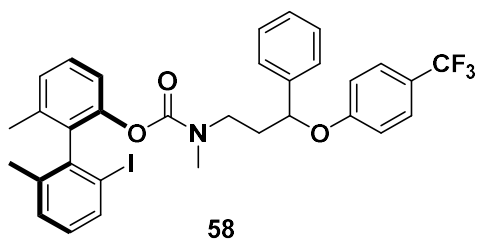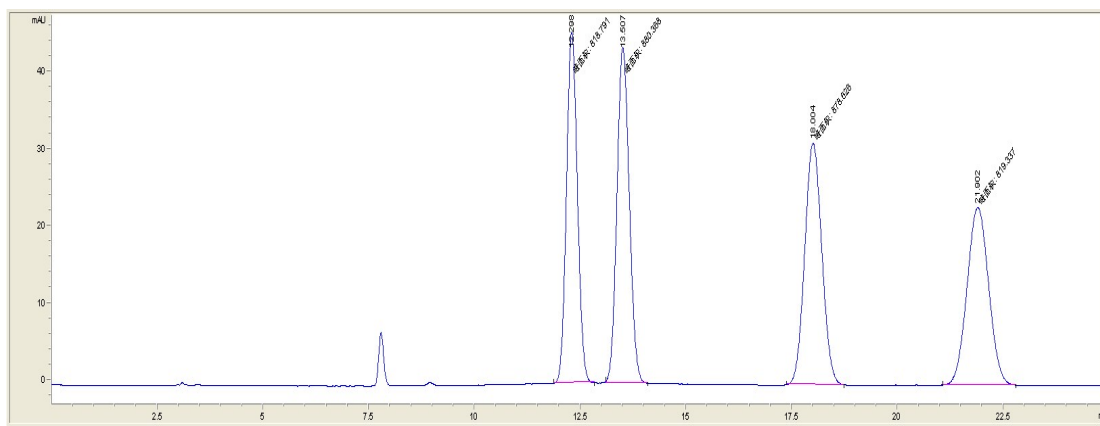

| Peak # | RetTime [min] | Area [mAU*s] | Height [mAU] | Width [min] | Symmetry [%] | Area [%] |
|--------|---------------|--------------|--------------|-------------|--------------|----------|
| 1      | 12.298        | 818.8        | 45.5         | 0.3         | 0.903        | 24.102   |
| 2      | 13.507        | 880.4        | 43.5         | 0.3374      | 0.885        | 25.915   |
| 3      | 18.004        | 878.6        | 31.3         | 0.4677      | 0.912        | 25.864   |
| 4      | 21.902        | 819.3        | 23           | 0.5938      | 0.967        | 24.119   |

**Figure S321. HPLC Spectra of racemic 58**

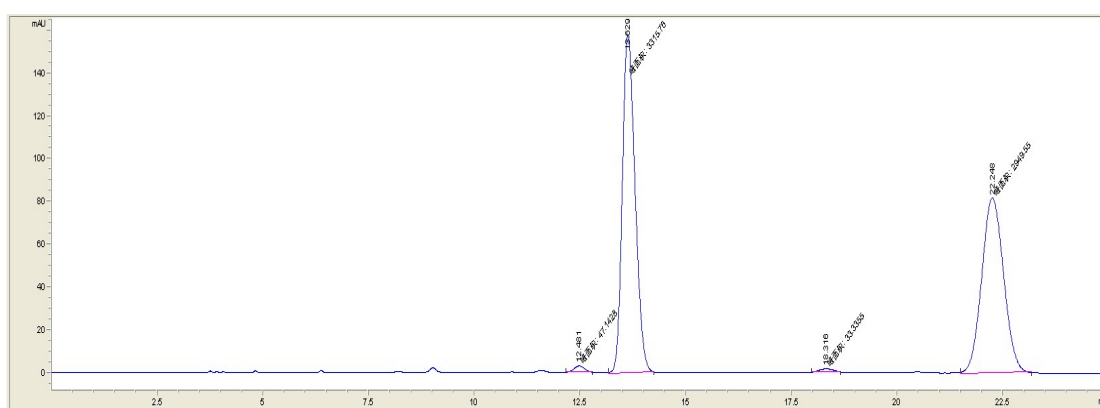

| Peak # | RetTime [min] | Area [mAU*s] | Height [mAU] | Width [min] | Symmetry [%] | Area [%] |
|--------|---------------|--------------|--------------|-------------|--------------|----------|
| 1      | 12.481        | 47.1         | 2.8          | 0.2775      | 1.123        | 0.743    |
| 2      | 13.629        | 3315.8       | 157.9        | 0.3499      | 0.742        | 52.251   |
| 3      | 18.316        | 33.3         | 1.5          | 0.3749      | 1.136        | 0.525    |
| 4      | 22.248        | 2949.6       | 81.8         | 0.6007      | 0.914        | 46.480   |

**Figure S322. HPLC Spectra of 58**

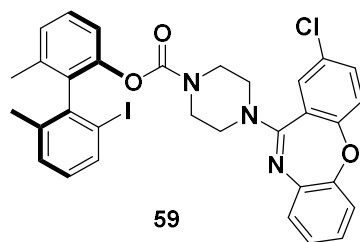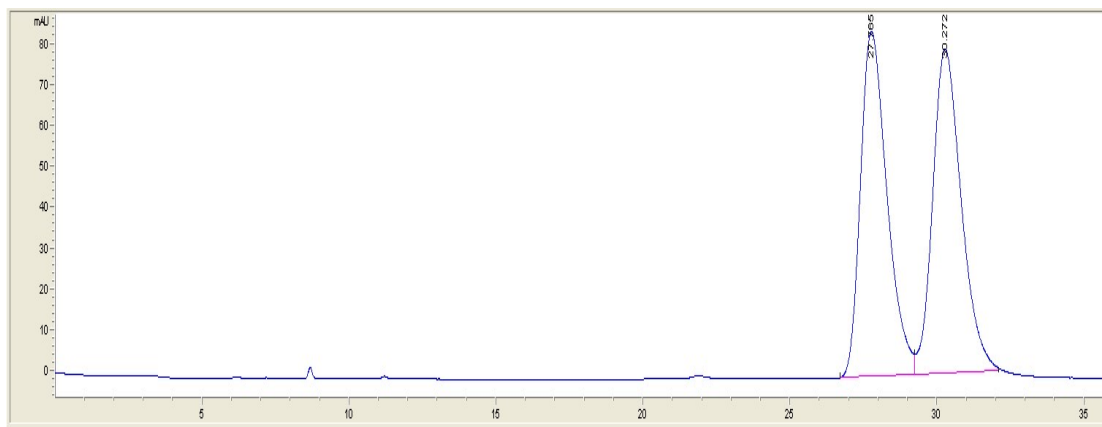

| Peak # | RetTime [min] | Area [mAU*s] | Height [mAU] | Width [min] | Symmetry [%] | Area [%] |
|--------|---------------|--------------|--------------|-------------|--------------|----------|
| 1      | 27.765        | 5300.1       | 84.4         | 0.959       | 0.66         | 49.721   |
| 2      | 30.272        | 5359.5       | 79.1         | 1.0101      | 0.734        | 50.279   |

**Figure S323. HPLC Spectra of racemic 59**

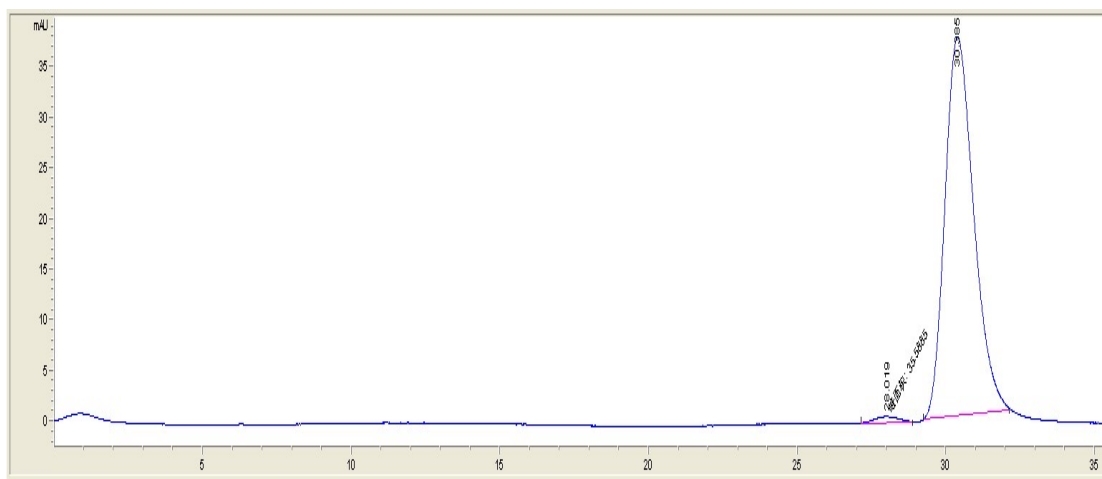

| Peak # | RetTime [min] | Area [mAU*s] | Height [mAU] | Width [min] | Symmetry [%] | Area [%] |
|--------|---------------|--------------|--------------|-------------|--------------|----------|
| 1      | 28.019        | 35.6         | 6.3E-1       | 0.9455      | 1.116        | 1.389    |
| 2      | 30.385        | 2527.5       | 37.5         | 0.9869      | 0.741        | 98.611   |

**Figure S324. HPLC Spectra of 59**

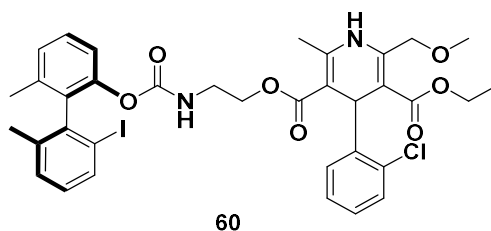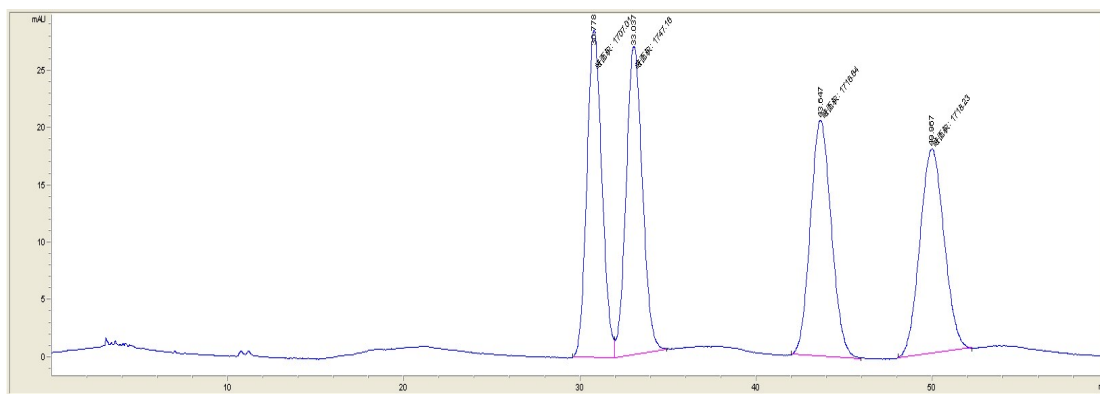

| Peak # | RetTime [min] | Area [mAU*s] | Height [mAU] | Width [min] | Symmetry | Area [%] |
|--------|---------------|--------------|--------------|-------------|----------|----------|
| 1      | 30.778        | 1707         | 28.6         | 0.9956      | 0.866    | 24.779   |
| 2      | 33.037        | 1747.2       | 27           | 1.0795      | 0.86     | 25.361   |
| 3      | 43.647        | 1716.6       | 20.6         | 1.3896      | 0.916    | 24.918   |
| 4      | 49.967        | 1718.2       | 17.9         | 1.604       | 0.975    | 24.942   |

**Figure S325. HPLC Spectra of racemic 60**

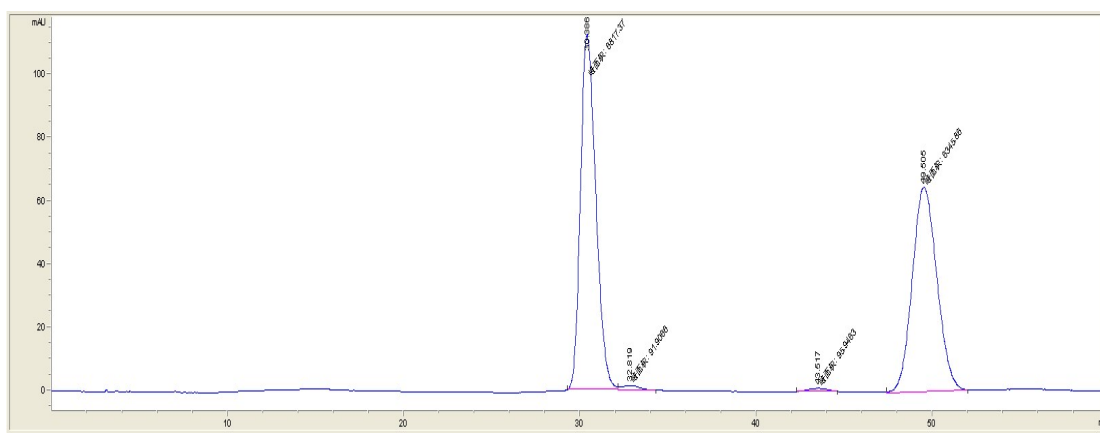

| Peak # | RetTime [min] | Area [mAU*s] | Height [mAU] | Width [min] | Symmetry | Area [%] |
|--------|---------------|--------------|--------------|-------------|----------|----------|
| 1      | 30.386        | 6817.4       | 112.5        | 1.0098      | 0.721    | 51.062   |
| 2      | 32.819        | 91.9         | 1.4          | 1.0726      | 0.88     | 0.688    |
| 3      | 43.517        | 95.9         | 1.2          | 1.3501      | 1.102    | 0.719    |
| 4      | 49.505        | 6345.9       | 64.8         | 1.6315      | 0.869    | 47.531   |

**Figure S326. HPLC Spectra of 60**



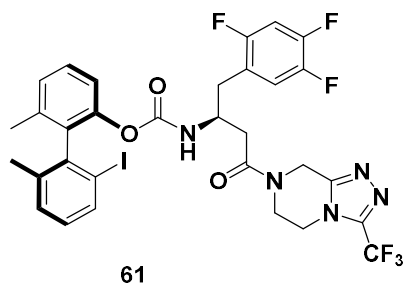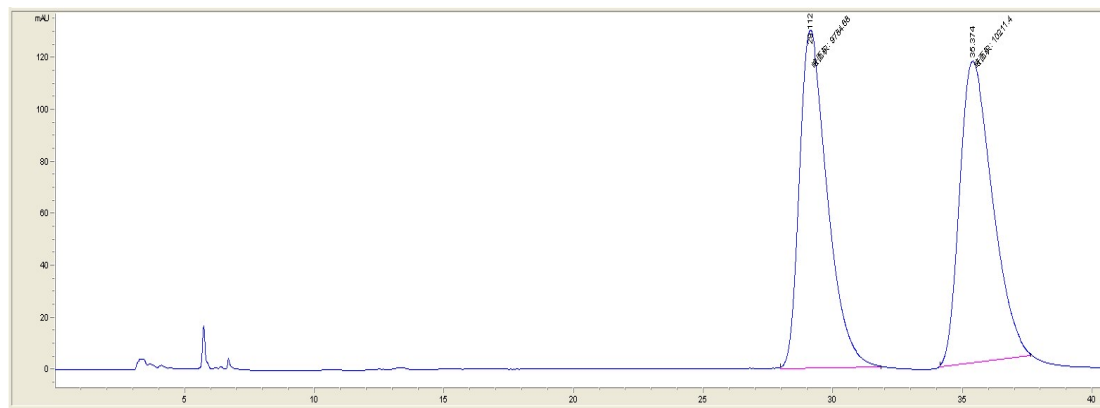

| Peak # | RetTime [min] | Area [mAU*s] | Height [mAU] | Width [min] | Symmetry | Area [%] |
|--------|---------------|--------------|--------------|-------------|----------|----------|
| 1      | 29.112        | 9784.7       | 130.1        | 1.2536      | 0.6      | 48.933   |
| 2      | 35.374        | 10211.4      | 116          | 1.4669      | 0.625    | 51.067   |

**Figure S327. HPLC Spectra of racemic 61**

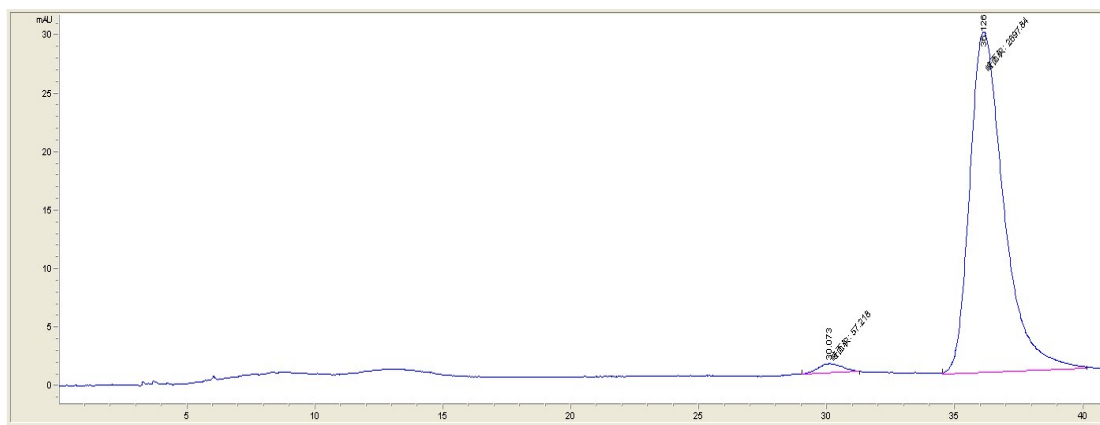

| Peak # | RetTime [min] | Area [mAU*s] | Height [mAU] | Width [min] | Symmetry | Area [%] |
|--------|---------------|--------------|--------------|-------------|----------|----------|
| 1      | 30.073        | 57.2         | 8.3E-1       | 1.1557      | 0.788    | 2.077    |
| 2      | 36.126        | 2697.8       | 29.1         | 1.545       | 0.681    | 97.923   |

**Figure S328. HPLC Spectra of 61**

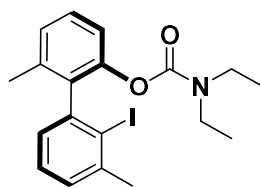

62

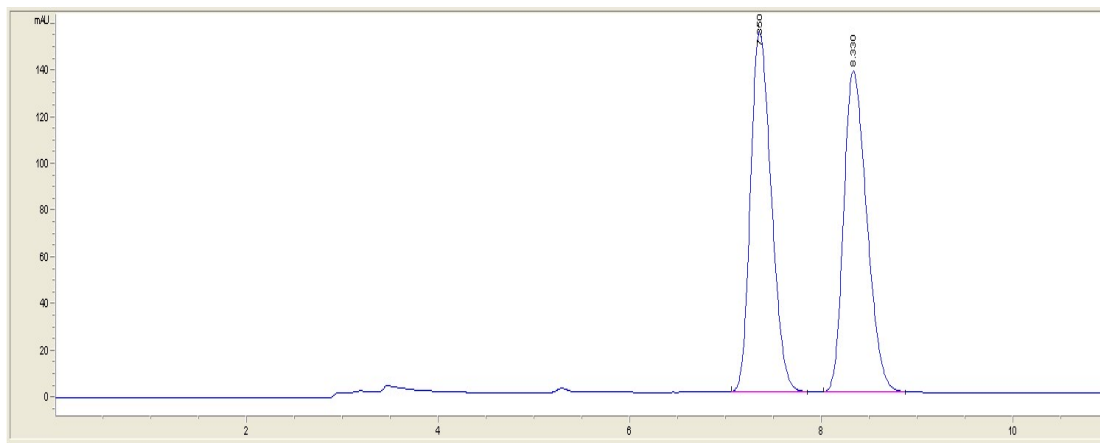

| Peak # | RetTime [min] | Area [mAU*s] | Height [mAU] | Width [min] | Symmetry [%] | Area [%] |
|--------|---------------|--------------|--------------|-------------|--------------|----------|
| 1      | 7.35          | 2320.7       | 154.2        | 0.2356      | 0.727        | 50.195   |
| 2      | 8.33          | 2302.7       | 137.4        | 0.2615      | 0.688        | 49.805   |

Figure S329. HPLC Spectra of racemic 62

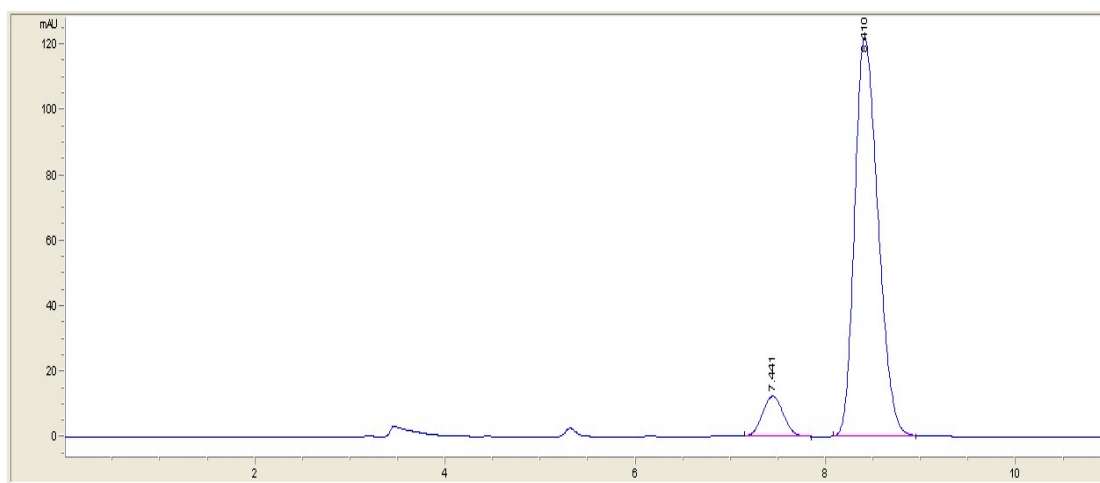

| Peak # | RetTime [min] | Area [mAU*s] | Height [mAU] | Width [min] | Symmetry [%] | Area [%] |
|--------|---------------|--------------|--------------|-------------|--------------|----------|
| 1      | 7.441         | 185.9        | 12.2         | 0.2396      | 0.919        | 8.183    |
| 2      | 8.41          | 2085.9       | 122          | 0.2675      | 0.71         | 91.817   |

Figure S330 HPLC Spectra of 62

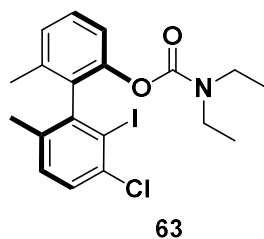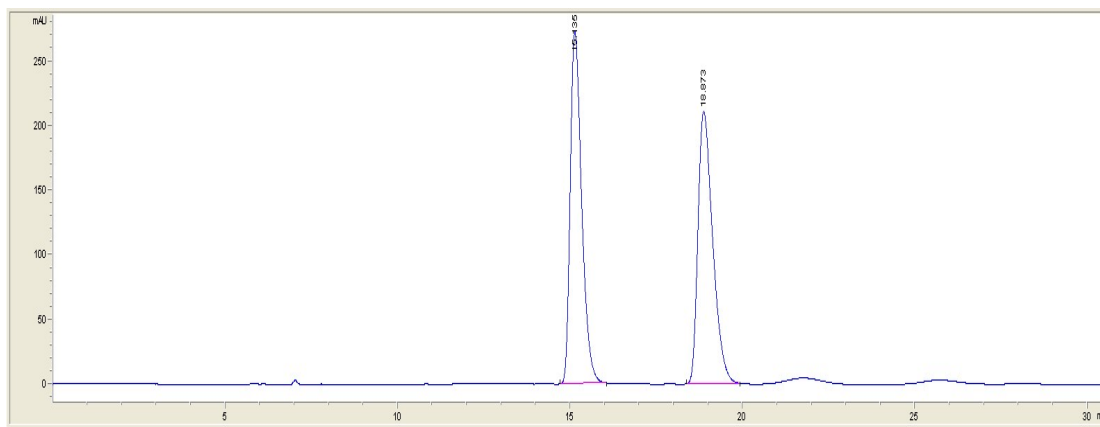

| Peak # | RetTime [min] | Area [mAU*s] | Height [mAU] | Width [min] | Symmetry [%] | Area [%] |
|--------|---------------|--------------|--------------|-------------|--------------|----------|
| 1      | 15.135        | 6317.5       | 272.4        | 0.3546      | 0.622        | 50.029   |
| 2      | 18.873        | 6310.2       | 210.9        | 0.455       | 0.591        | 49.971   |

**Figure S331. HPLC Spectra of racemic 63**

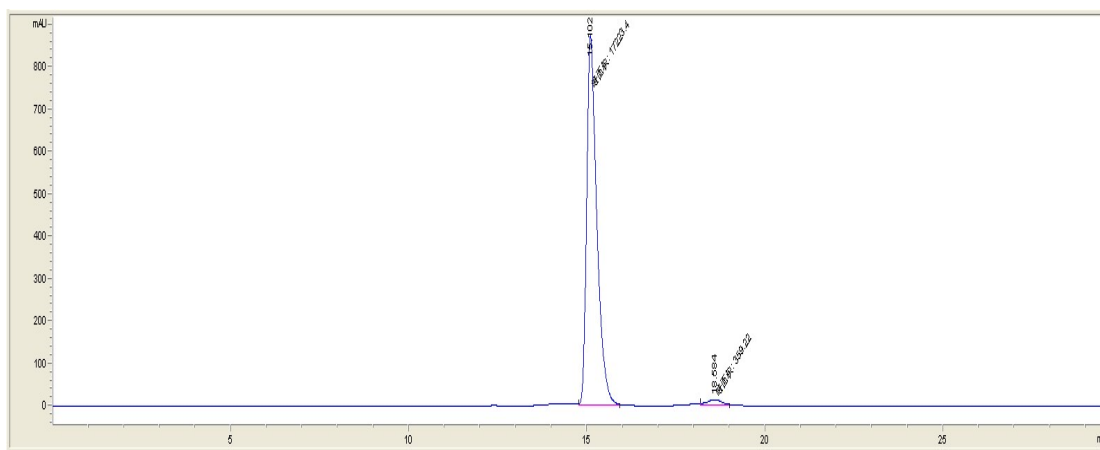

| Peak # | RetTime [min] | Area [mAU*s] | Height [mAU] | Width [min] | Symmetry [%] | Area [%] |
|--------|---------------|--------------|--------------|-------------|--------------|----------|
| 1      | 15.102        | 17223.4      | 872.3        | 0.3291      | 0.595        | 97.957   |
| 2      | 18.584        | 359.2        | 12.6         | 0.4742      | 1.053        | 2.043    |

**Figure S332. HPLC Spectra of 63**

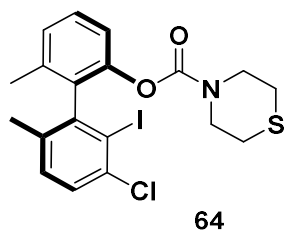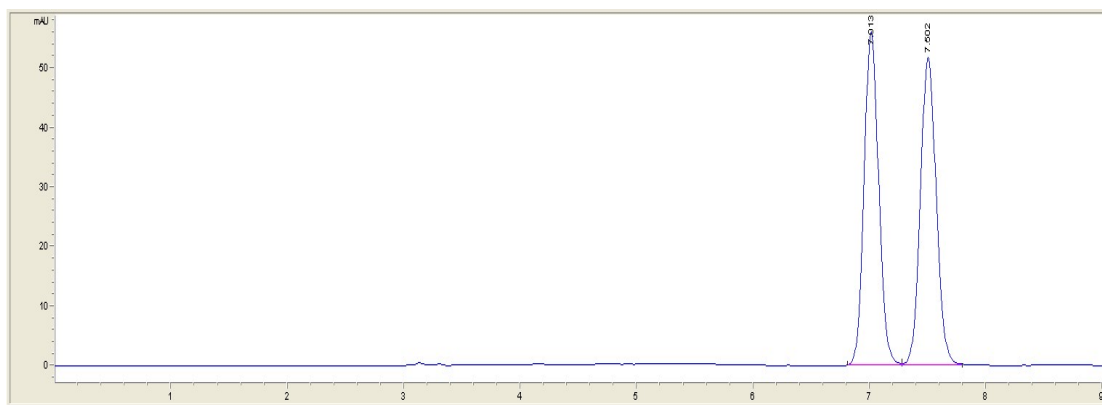

| Peak # | RetTime [min] | Area [mAU*s] | Height [mAU] | Width [min] | Symmetry [%] | Area [%] |
|--------|---------------|--------------|--------------|-------------|--------------|----------|
| 1      | 7.013         | 489.6        | 56.1         | 0.1359      | 0.886        | 49.932   |
| 2      | 7.502         | 491          | 51.7         | 0.1488      | 0.898        | 50.068   |

**Figure S333. HPLC Spectra of racemic 64**

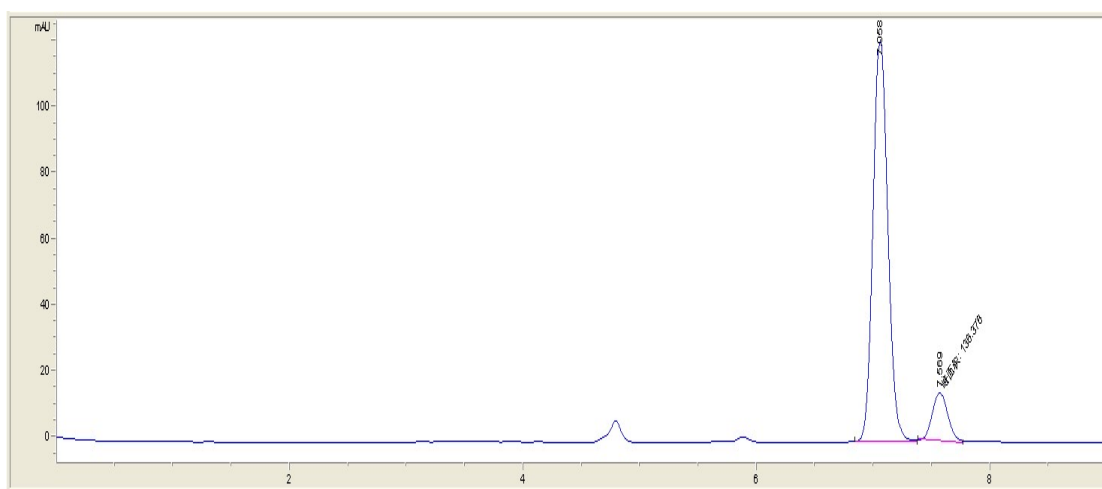

| Peak # | RetTime [min] | Area [mAU*s] | Height [mAU] | Width [min] | Symmetry [%] | Area [%] |
|--------|---------------|--------------|--------------|-------------|--------------|----------|
| 1      | 7.058         | 1071.2       | 121.8        | 0.1366      | 0.864        | 88.706   |
| 2      | 7.569         | 136.4        | 14.7         | 0.1551      | 0.889        | 11.294   |

**Figure S334. HPLC Spectra of 64**

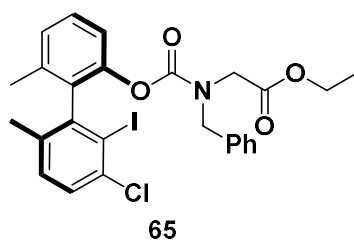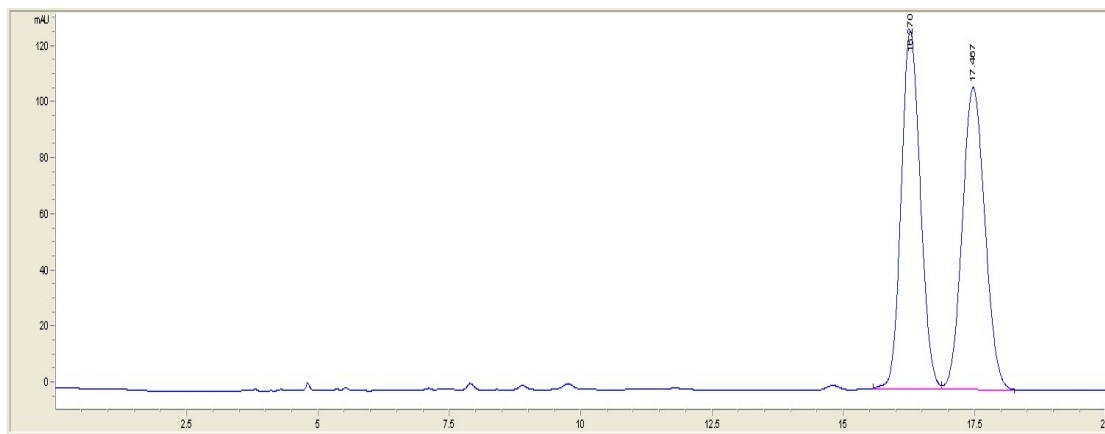

| Peak # | RetTime [min] | Area [mAU*s] | Height [mAU] | Width [min] | Symmetry [%] | Area [%] |
|--------|---------------|--------------|--------------|-------------|--------------|----------|
| 1      | 16.27         | 3244.6       | 127.7        | 0.3945      | 0.865        | 50.076   |
| 2      | 17.467        | 3234.7       | 107.9        | 0.4676      | 0.89         | 49.924   |

**Figure S335. HPLC Spectra of racemic 65**

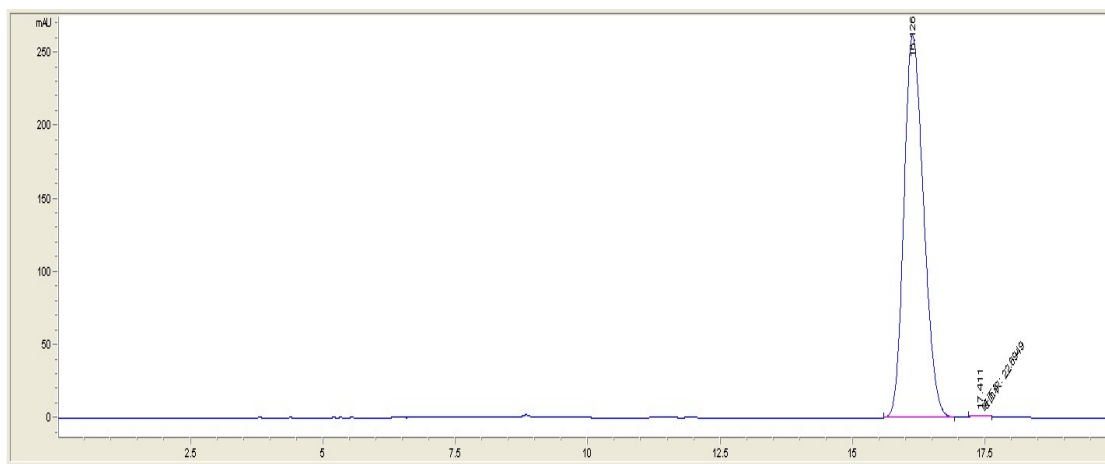

| Peak # | RetTime [min] | Area [mAU*s] | Height [mAU] | Width [min] | Symmetry [%] | Area [%] |
|--------|---------------|--------------|--------------|-------------|--------------|----------|
| 1      | 16.126        | 6763.1       | 261.7        | 0.4015      | 0.751        | 99.666   |
| 2      | 17.411        | 22.7         | 1.2          | 0.3203      | 0.979        | 0.334    |

**Figure S336. HPLC Spectra of 65**

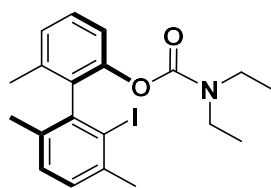

66

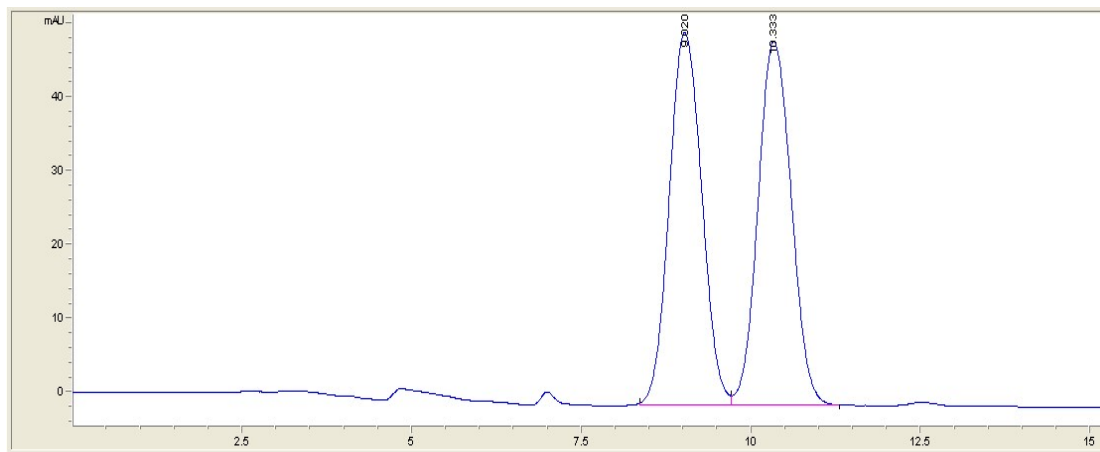

| Peak # | RetTime [min] | Area [mAU*s] | Height [mAU] | Width [min] | Symmetry [%] | Area [%] |
|--------|---------------|--------------|--------------|-------------|--------------|----------|
| 1      | 9.02          | 1683.9       | 50.5         | 0.5289      | 0.88         | 50.017   |
| 2      | 10.333        | 1682.7       | 49.4         | 0.5437      | 0.867        | 49.983   |

Figure S337. HPLC Spectra of racemic 66

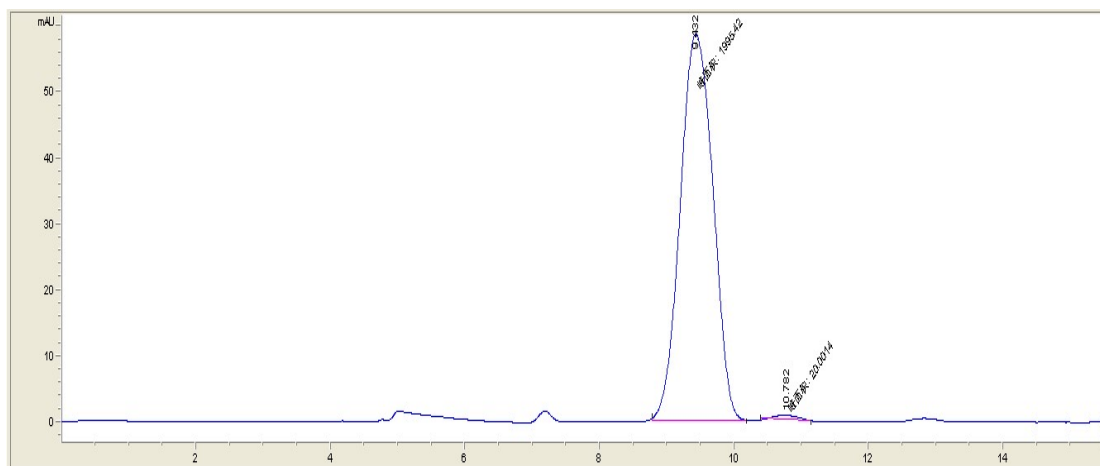

| Peak # | RetTime [min] | Area [mAU*s] | Height [mAU] | Width [min] | Symmetry [%] | Area [%] |
|--------|---------------|--------------|--------------|-------------|--------------|----------|
| 1      | 9.432         | 1995.4       | 58.7         | 0.5665      | 0.896        | 99.008   |
| 2      | 10.782        | 20           | 7.5E-1       | 0.4448      | 0.581        | 0.992    |

Figure S338. HPLC Spectra of 66

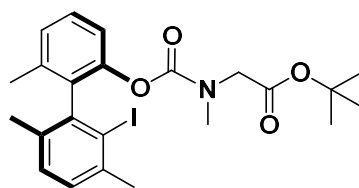

67

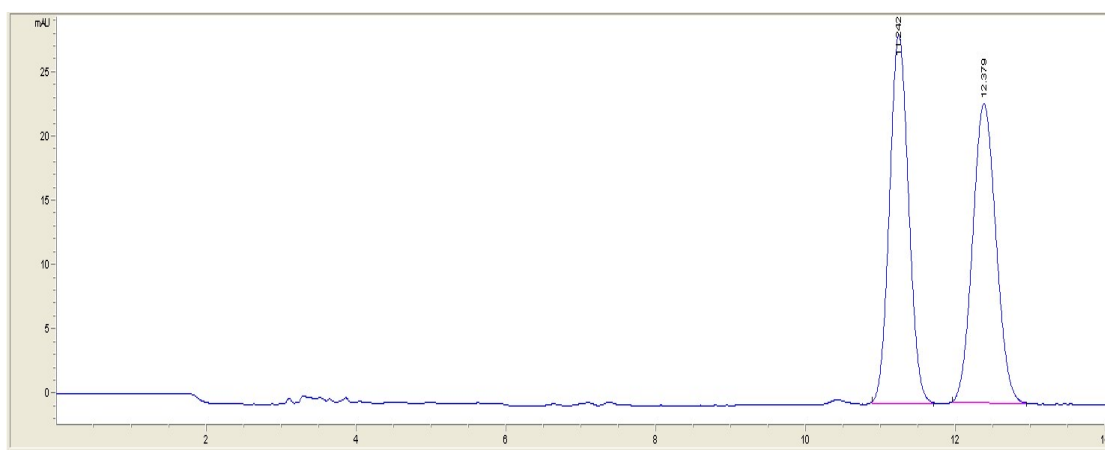

| Peak # | RetTime [min] | Area [mAU*s] | Height [mAU] | Width [min] | Symmetry | Area [%] |
|--------|---------------|--------------|--------------|-------------|----------|----------|
| 1      | 11.242        | 508.9        | 28.7         | 0.2748      | 0.907    | 50.070   |
| 2      | 12.379        | 507.4        | 23.3         | 0.3396      | 0.903    | 49.930   |

Figure S339. HPLC Spectra of racemic 67

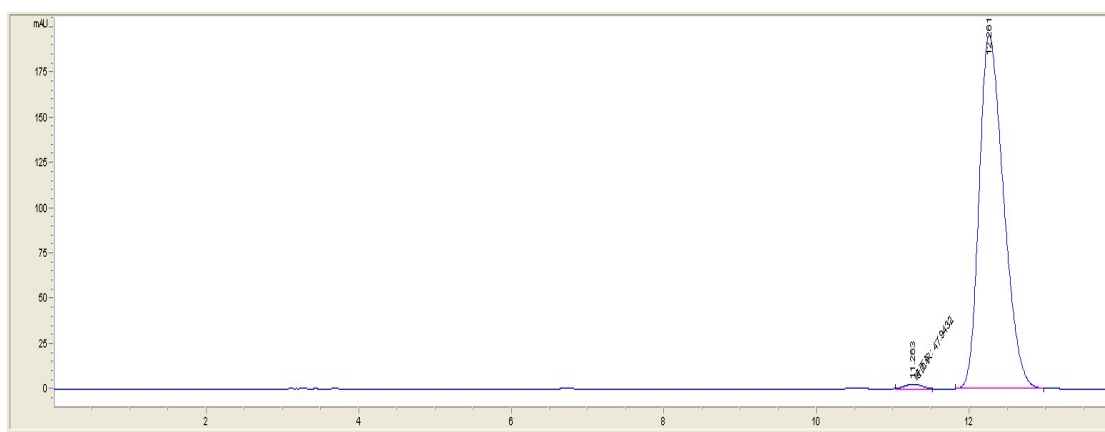

| Peak # | RetTime [min] | Area [mAU*s] | Height [mAU] | Width [min] | Symmetry | Area [%] |
|--------|---------------|--------------|--------------|-------------|----------|----------|
| 1      | 11.263        | 47.9         | 2.8          | 0.2832      | 0.95     | 1.092    |
| 2      | 12.261        | 4341.4       | 195.5        | 0.3431      | 0.667    | 98.908   |

Figure S340. HPLC Spectra of 67

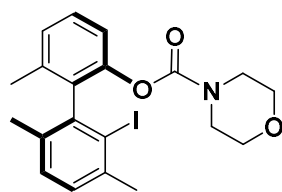

68

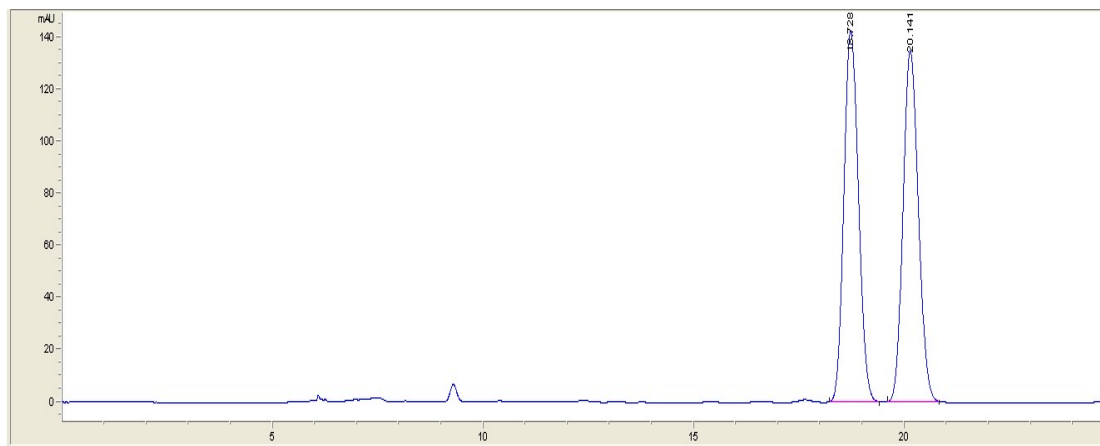

| Peak # | RetTime [min] | Area [mAU*s] | Height [mAU] | Width [min] | Symmetry [%] | Area [%] |
|--------|---------------|--------------|--------------|-------------|--------------|----------|
| 1      | 18.728        | 3427.9       | 142.7        | 0.3762      | 0.865        | 49.986   |
| 2      | 20.141        | 3429.8       | 134.9        | 0.3986      | 0.856        | 50.014   |

Figure S341. HPLC Spectra of racemic 68

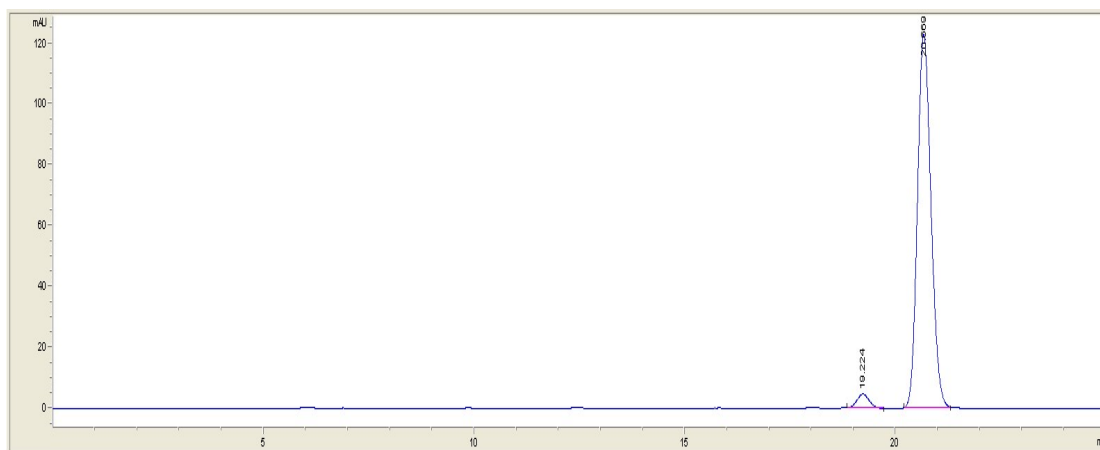

| Peak # | RetTime [min] | Area [mAU*s] | Height [mAU] | Width [min] | Symmetry [%] | Area [%] |
|--------|---------------|--------------|--------------|-------------|--------------|----------|
| 1      | 19.224        | 92.3         | 4.6          | 0.3052      | 0.904        | 3.258    |
| 2      | 20.669        | 2741         | 122.8        | 0.3485      | 0.83         | 96.742   |

Figure S342. HPLC Spectra of 68



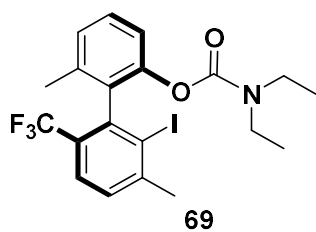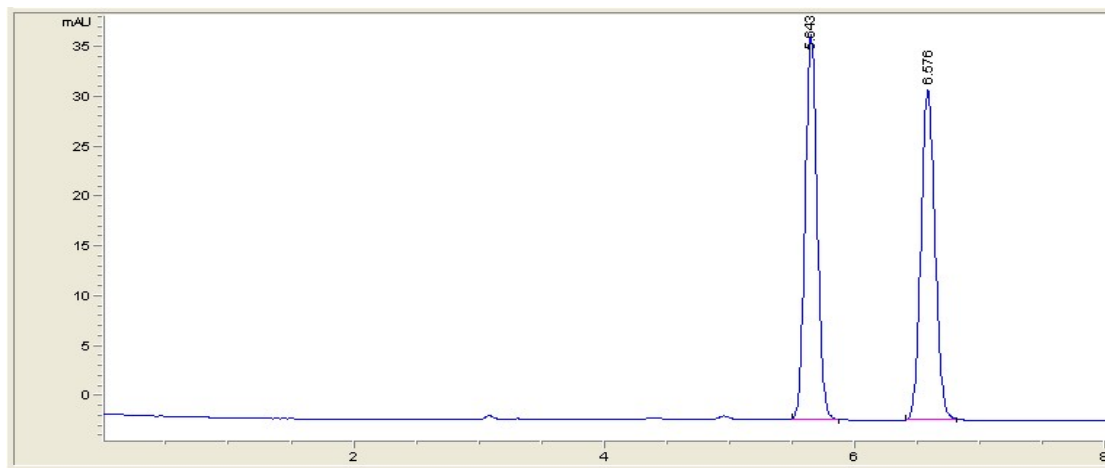

| Peak # | RetTime [min] | Area [mAU*s] | Height [mAU] | Width [min] | Symmetry | Area [%] |
|--------|---------------|--------------|--------------|-------------|----------|----------|
| 1      | 5.643         | 256.6        | 38.6         | 0.1036      | 0.916    | 49.884   |
| 2      | 6.576         | 257.8        | 33.1         | 0.1208      | 0.914    | 50.116   |

**Figure S343. HPLC Spectra of racemic 69**

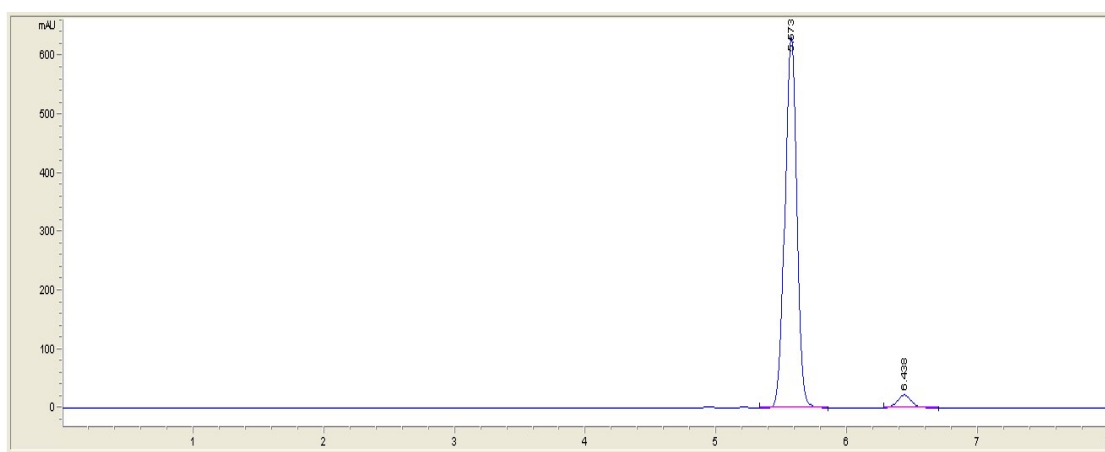

| Peak # | RetTime [min] | Area [mAU*s] | Height [mAU] | Width [min] | Symmetry | Area [%] |
|--------|---------------|--------------|--------------|-------------|----------|----------|
| 1      | 5.573         | 4019.2       | 632.7        | 0.0981      | 1.047    | 95.995   |
| 2      | 6.438         | 167.7        | 21.9         | 0.1175      | 0.891    | 4.005    |

**Figure S344. HPLC Spectra of 69**

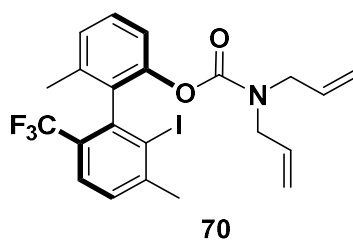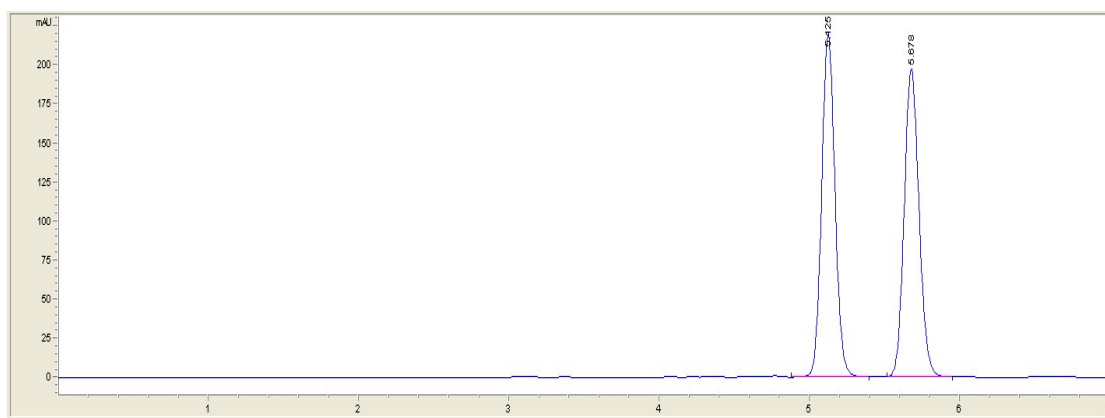

| Peak # | RetTime [min] | Area [mAU*s] | Height [mAU] | Width [min] | Symmetry | Area [%] |
|--------|---------------|--------------|--------------|-------------|----------|----------|
| 1      | 5.125         | 1354.1       | 220.3        | 0.0957      | 0.912    | 50.035   |
| 2      | 5.678         | 1352.2       | 197.2        | 0.106       | 0.863    | 49.965   |

**Figure S345. HPLC Spectra of racemic 70**

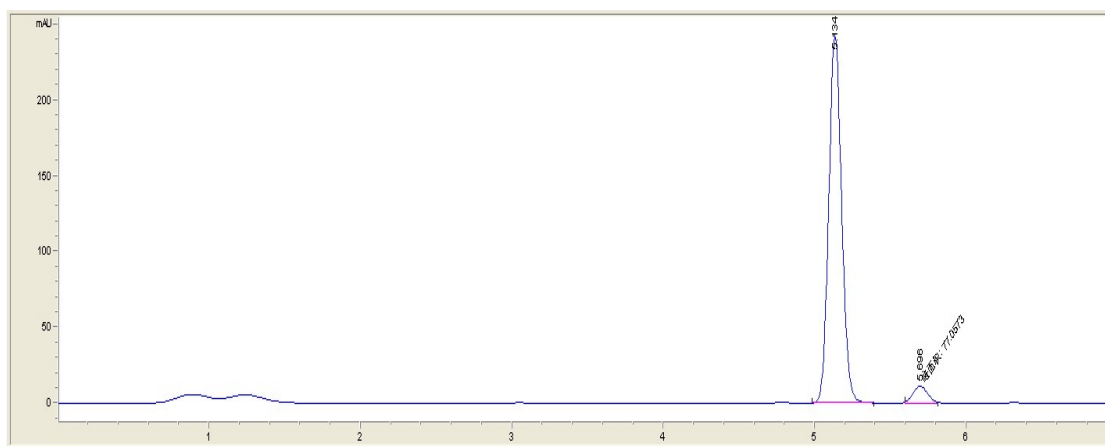

| Peak # | RetTime [min] | Area [mAU*s] | Height [mAU] | Width [min] | Symmetry | Area [%] |
|--------|---------------|--------------|--------------|-------------|----------|----------|
| 1      | 5.134         | 1441         | 243.1        | 0.0912      | 0.906    | 94.924   |
| 2      | 5.696         | 77.1         | 11.6         | 0.1106      | 0.913    | 5.076    |

**Figure S346. HPLC Spectra of 70**

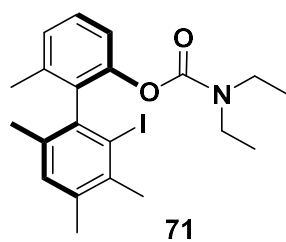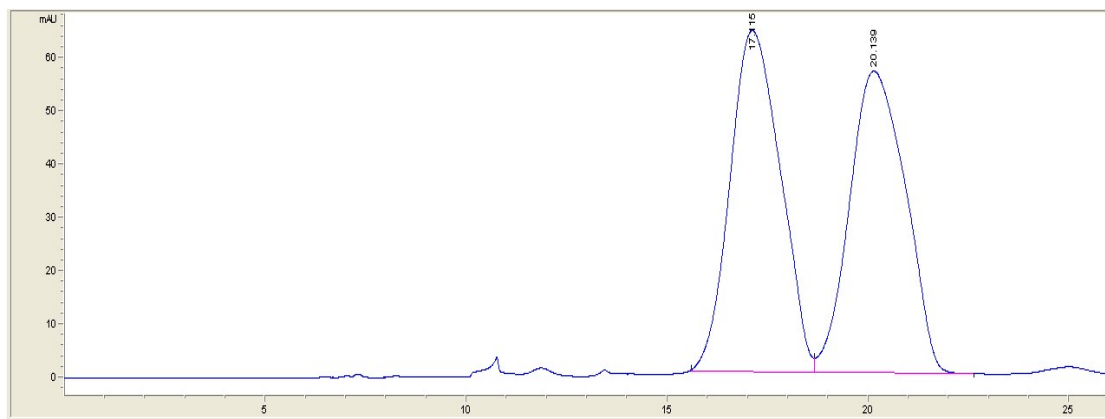

| Peak # | RetTime [min] | Area [mAU*s] | Height [mAU] | Width [min] | Symmetry [%] | Area [%] |
|--------|---------------|--------------|--------------|-------------|--------------|----------|
| 1      | 17.115        | 5615.8       | 64.2         | 1.3147      | 0.788        | 50.542   |
| 2      | 20.139        | 5495.4       | 56.7         | 1.3907      | 0.767        | 49.458   |

**Supplementary Figure 347. HPLC Spectra of racemic 71**

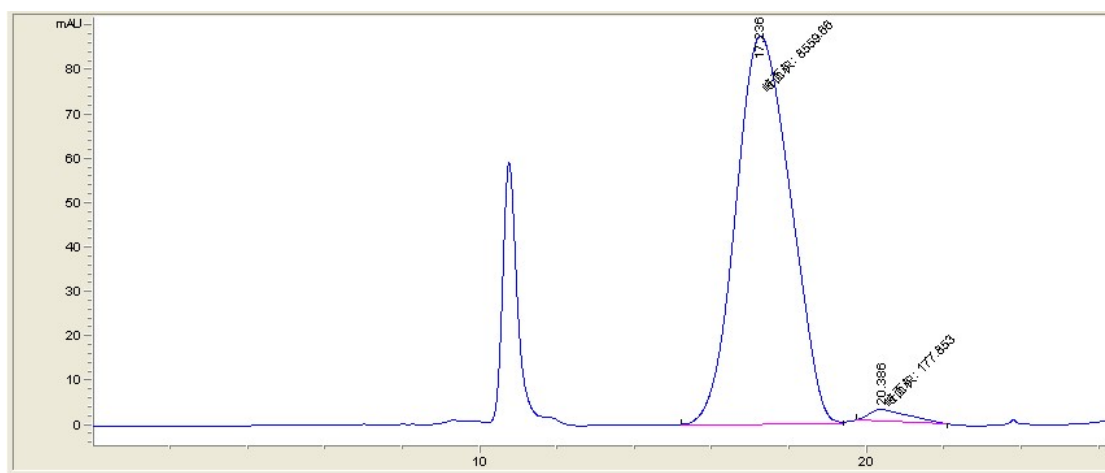

| Peak # | RetTime [min] | Area [mAU*s] | Height [mAU] | Width [min] | Symmetry [%] | Area [%] |
|--------|---------------|--------------|--------------|-------------|--------------|----------|
| 1      | 17.236        | 8559.7       | 87.4         | 1.6325      | 0.813        | 97.964   |
| 2      | 20.386        | 177.9        | 2.6          | 1.1589      | 0.401        | 2.036    |

**Figure S348. HPLC Spectra of 71**

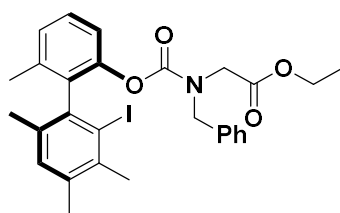

72

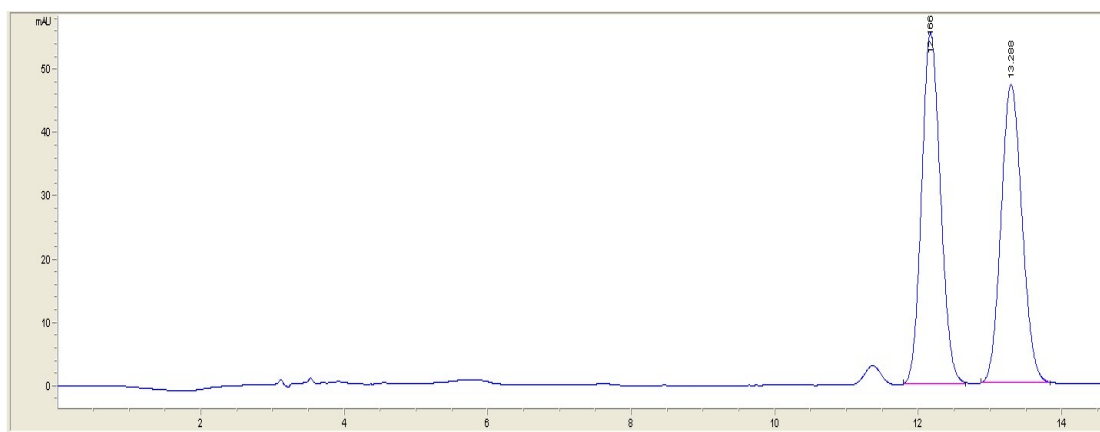

| Peak # | RetTime [min] | Area [mAU*s] | Height [mAU] | Width [min] | Symmetry | Area [%] |
|--------|---------------|--------------|--------------|-------------|----------|----------|
| 1      | 12.166        | 1011.2       | 55.4         | 0.2848      | 0.861    | 51.267   |
| 2      | 13.288        | 961.3        | 47.2         | 0.3155      | 0.864    | 48.733   |

Figure S349. HPLC Spectra of racemic 72

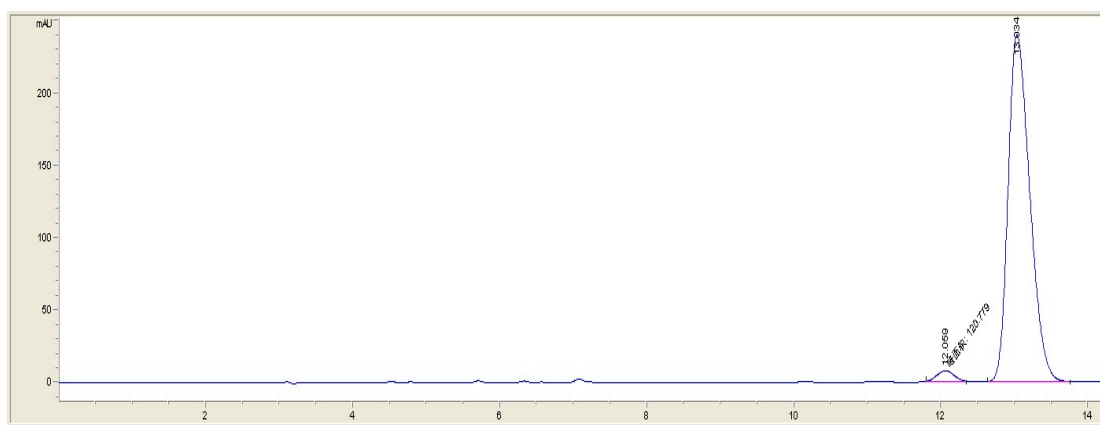

| Peak # | RetTime [min] | Area [mAU*s] | Height [mAU] | Width [min] | Symmetry | Area [%] |
|--------|---------------|--------------|--------------|-------------|----------|----------|
| 1      | 12.059        | 120.8        | 7.5          | 0.2698      | 0.936    | 2.401    |
| 2      | 13.034        | 4910.5       | 239.9        | 0.3168      | 0.662    | 97.599   |

Figure S350. HPLC Spectra of 72

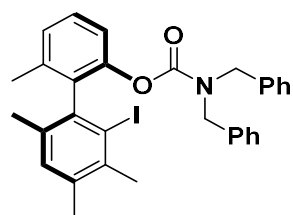

73

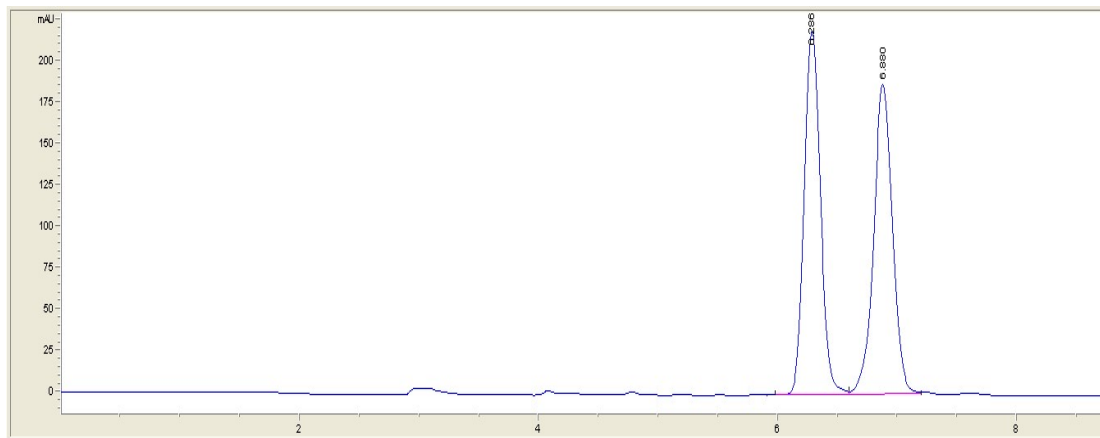

| Peak # | RetTime [min] | Area [mAU*s] | Height [mAU] | Width [min] | Symmetry [%] | Area [%] |
|--------|---------------|--------------|--------------|-------------|--------------|----------|
| 1      | 6.286         | 2070.5       | 219.8        | 0.1479      | 0.859        | 50.115   |
| 2      | 6.88          | 2061         | 187.5        | 0.1682      | 0.952        | 49.885   |

Figure S351. HPLC Spectra of racemic 73

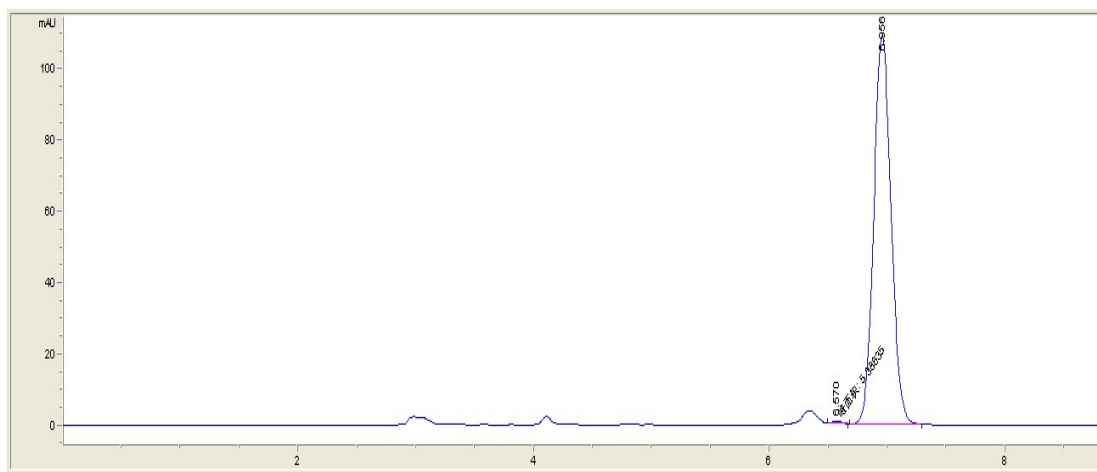

| Peak # | RetTime [min] | Area [mAU*s] | Height [mAU] | Width [min] | Symmetry [%] | Area [%] |
|--------|---------------|--------------|--------------|-------------|--------------|----------|
| 1      | 6.57          | 5.4          | 8.8E-1       | 0.1015      | 0.977        | 0.479    |
| 2      | 6.956         | 1118.9       | 109.4        | 0.1593      | 0.892        | 99.521   |

Figure S352. HPLC Spectra of 73

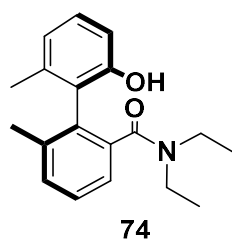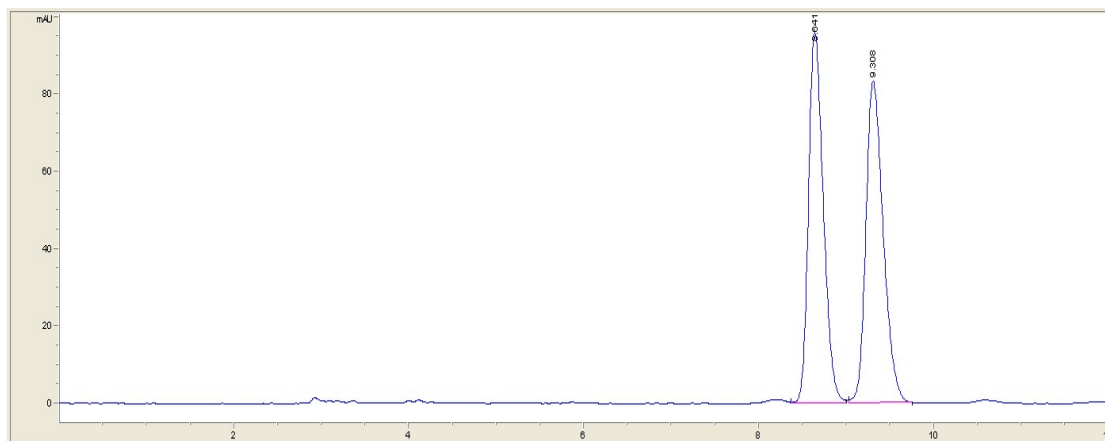

| Peak # | RetTime [min] | Area [mAU*s] | Height [mAU] | Width [min] | Symmetry | Area [%] |
|--------|---------------|--------------|--------------|-------------|----------|----------|
| 1      | 8.641         | 1132.1       | 96           | 0.1836      | 0.704    | 49.670   |
| 2      | 9.308         | 1147.1       | 83.3         | 0.2127      | 0.688    | 50.330   |

**Figure S353. HPLC Spectra of racemic 74**

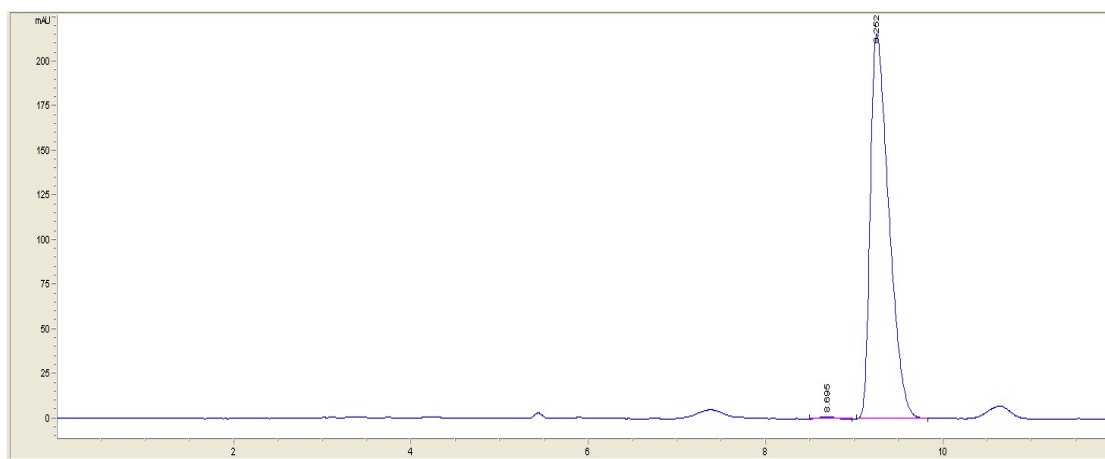

| Peak # | RetTime [min] | Area [mAU*s] | Height [mAU] | Width [min] | Symmetry | Area [%] |
|--------|---------------|--------------|--------------|-------------|----------|----------|
| 1      | 8.695         | 13.7         | 1.3          | 0.1457      | 1.068    | 0.434    |
| 2      | 9.252         | 3148.9       | 215.8        | 0.2242      | 0.494    | 99.566   |

**Figure S354. HPLC Spectra of 74**

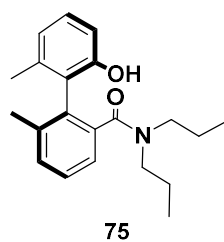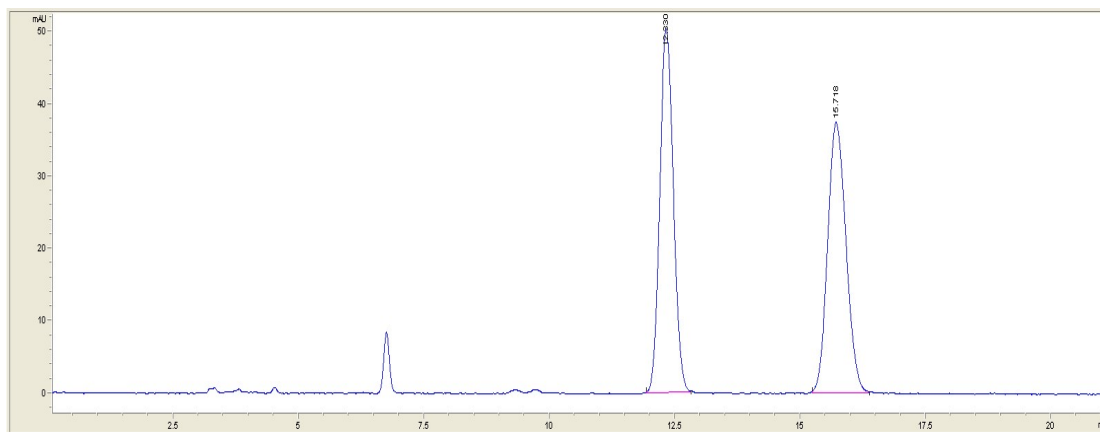

| Peak # | RetTime [min] | Area [mAU*s] | Height [mAU] | Width [min] | Symmetry | Area [%] |
|--------|---------------|--------------|--------------|-------------|----------|----------|
| 1      | 12.33         | 951.7        | 50.4         | 0.2944      | 0.86     | 50.014   |
| 2      | 15.718        | 951.2        | 37.4         | 0.3926      | 0.828    | 49.986   |

**Figure S355. HPLC Spectra of racemic 75**

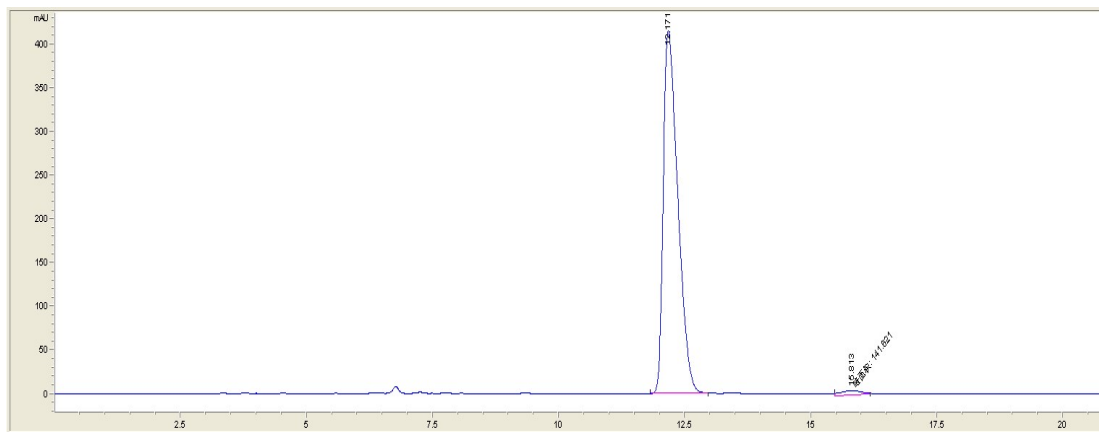

| Peak # | RetTime [min] | Area [mAU*s] | Height [mAU] | Width [min] | Symmetry | Area [%] |
|--------|---------------|--------------|--------------|-------------|----------|----------|
| 1      | 12.171        | 8316.4       | 415.3        | 0.3056      | 0.491    | 98.302   |
| 2      | 15.813        | 143.7        | 4.9          | 0.4851      | 0.938    | 1.698    |

**Figure S356. HPLC Spectra of 75**

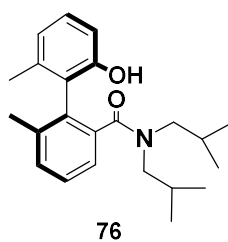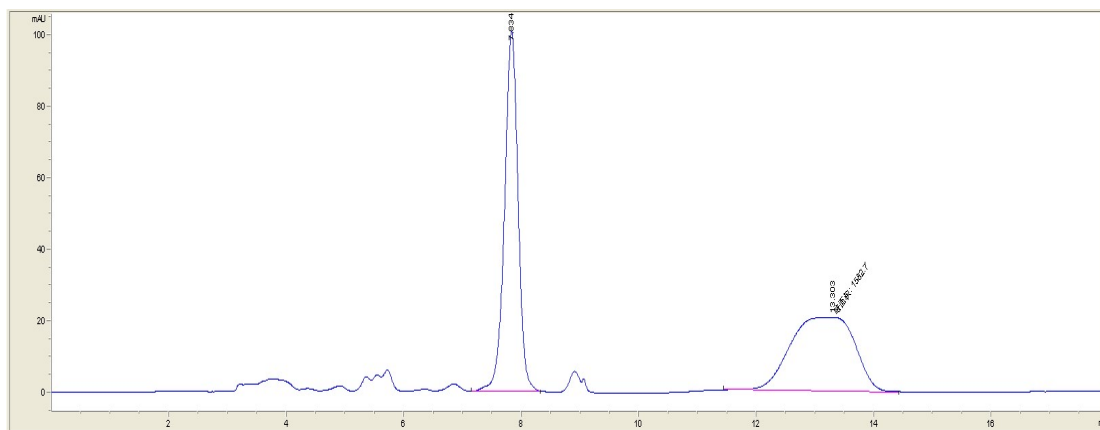

| Peak # | RetTime [min] | Area [mAU*s] | Height [mAU] | Width [min] | Symmetry [%] | Area [%] |
|--------|---------------|--------------|--------------|-------------|--------------|----------|
| 1      | 7.834         | 1618.2       | 100.7        | 0.2455      | 1.079        | 50.555   |
| 2      | 13.303        | 1582.7       | 20.8         | 1.2712      | 1.747        | 49.445   |

**Figure S357. HPLC Spectra of racemic 76**

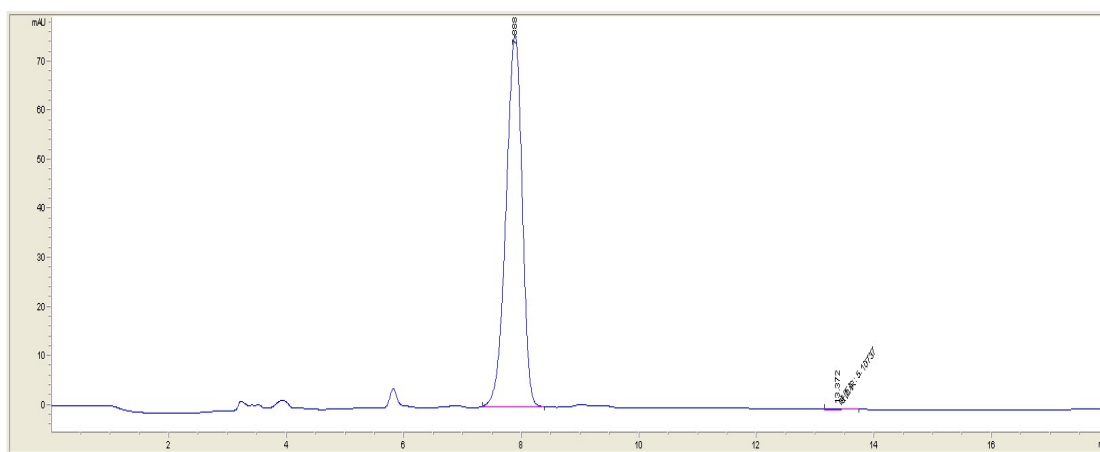

| Peak # | RetTime [min] | Area [mAU*s] | Height [mAU] | Width [min] | Symmetry [%] | Area [%] |
|--------|---------------|--------------|--------------|-------------|--------------|----------|
| 1      | 7.888         | 1454.1       | 75.8         | 0.2999      | 1.24         | 99.650   |
| 2      | 13.372        | 5.1          | 2.2E-1       | 0.2856      | 1.17         | 0.350    |

**Figure S358. HPLC Spectra of 76**



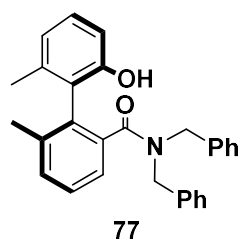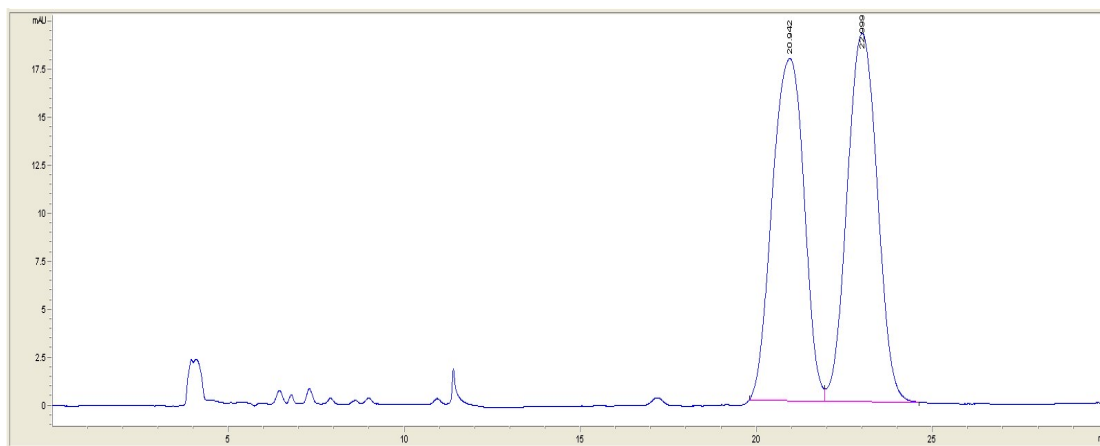

| Peak # | RetTime [min] | Area [mAU*s] | Height [mAU] | Width [min] | Symmetry [%] | Area [%] |
|--------|---------------|--------------|--------------|-------------|--------------|----------|
| 1      | 20.942        | 1125         | 17.9         | 1.0031      | 1.17         | 49.512   |
| 2      | 22.999        | 1147.1       | 19.2         | 0.9411      | 0.955        | 50.488   |

**Figure S359. HPLC Spectra of racemic 77**

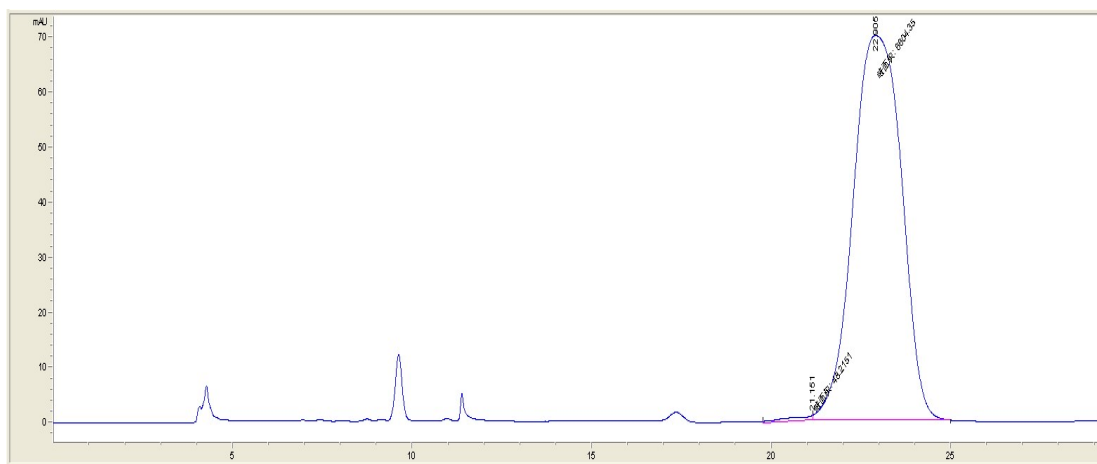

| Peak # | RetTime [min] | Area [mAU*s] | Height [mAU] | Width [min] | Symmetry [%] | Area [%] |
|--------|---------------|--------------|--------------|-------------|--------------|----------|
| 1      | 21.151        | 48.2         | 1            | 0.8002      | 1.844        | 0.725    |
| 2      | 22.905        | 6604.4       | 70           | 1.5725      | 0.872        | 99.275   |

**Figure S360. HPLC Spectra of 77**

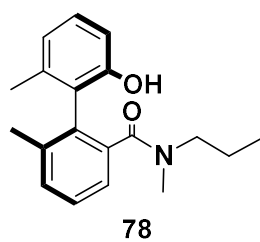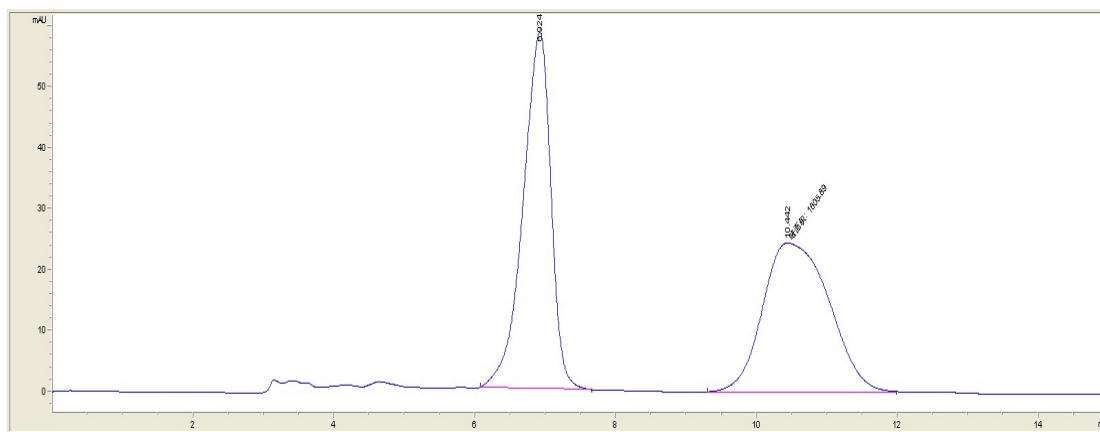

| Peak # | RetTime [min] | Area [mAU*s] | Height [mAU] | Width [min] | Symmetry | Area [%] |
|--------|---------------|--------------|--------------|-------------|----------|----------|
| 1      | 6.924         | 1625         | 58.5         | 0.4299      | 1.497    | 50.296   |
| 2      | 10.442        | 1605.9       | 24.5         | 1.0918      | 0.609    | 49.704   |

**Figure S361. HPLC Spectra of racemic 78**

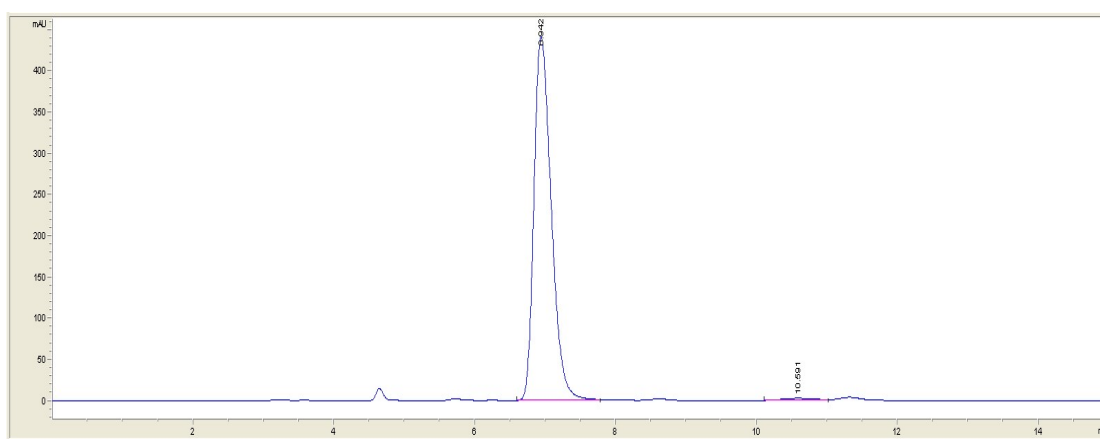

| Peak # | RetTime [min] | Area [mAU*s] | Height [mAU] | Width [min] | Symmetry | Area [%] |
|--------|---------------|--------------|--------------|-------------|----------|----------|
| 1      | 6.942         | 7530.7       | 441.1        | 0.2652      | 0.663    | 98.828   |
| 2      | 10.591        | 89.3         | 2.7          | 0.4725      | 0.866    | 1.172    |

**Figure S362. HPLC Spectra of 78**

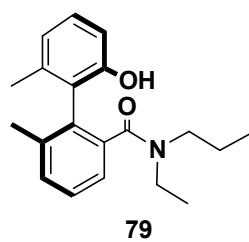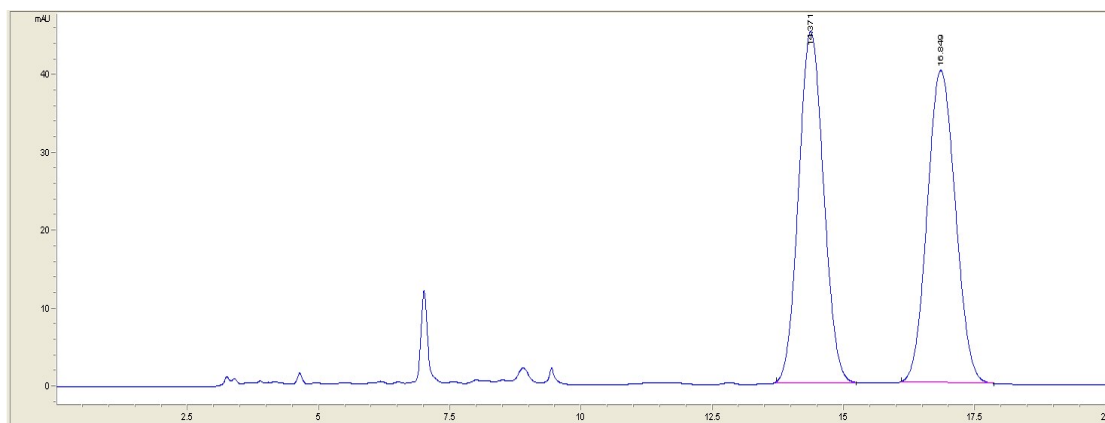

| Peak # | RetTime [min] | Area [mAU*s] | Height [mAU] | Width [min] | Symmetry | Area [%] |
|--------|---------------|--------------|--------------|-------------|----------|----------|
| 1      | 14.371        | 1496.2       | 45.2         | 0.5164      | 0.91     | 49.929   |
| 2      | 16.849        | 1500.5       | 40.2         | 0.5879      | 0.897    | 50.071   |

**Figure S363. HPLC Spectra of racemic 79**

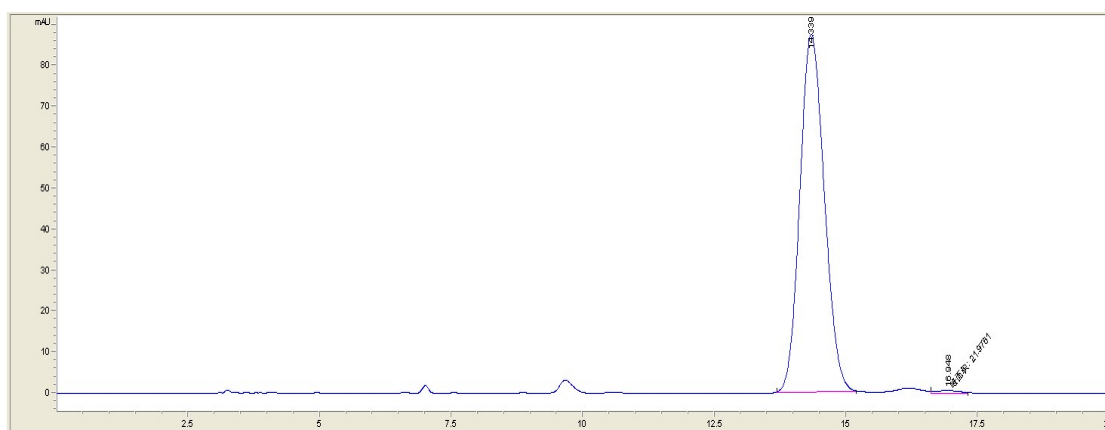

| Peak # | RetTime [min] | Area [mAU*s] | Height [mAU] | Width [min] | Symmetry | Area [%] |
|--------|---------------|--------------|--------------|-------------|----------|----------|
| 1      | 14.339        | 2835.3       | 87.5         | 0.5059      | 0.836    | 99.231   |
| 2      | 16.948        | 22           | 6.7E-1       | 0.5485      | 1.15     | 0.769    |

**Figure S364. HPLC Spectra of 79**

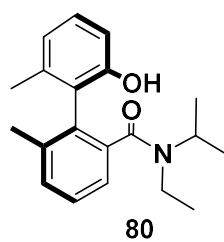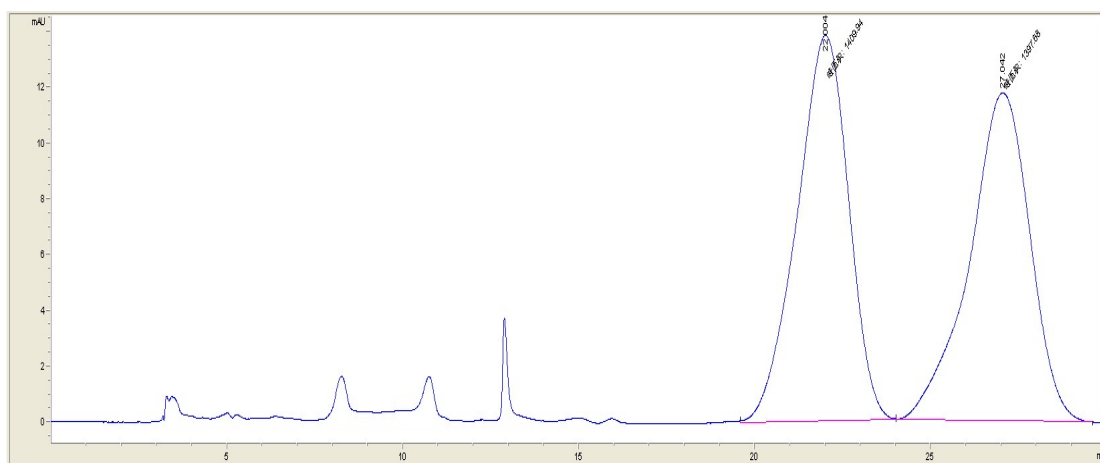

| Peak # | RetTime [min] | Area [mAU*s] | Height [mAU] | Width [min] | Symmetry | Area [%] |
|--------|---------------|--------------|--------------|-------------|----------|----------|
| 1      | 22.004        | 1409.9       | 13.8         | 1.7009      | 1.191    | 50.218   |
| 2      | 27.042        | 1397.7       | 11.7         | 1.9839      | 1.188    | 49.782   |

**Figure S365. HPLC Spectra of racemic 80**

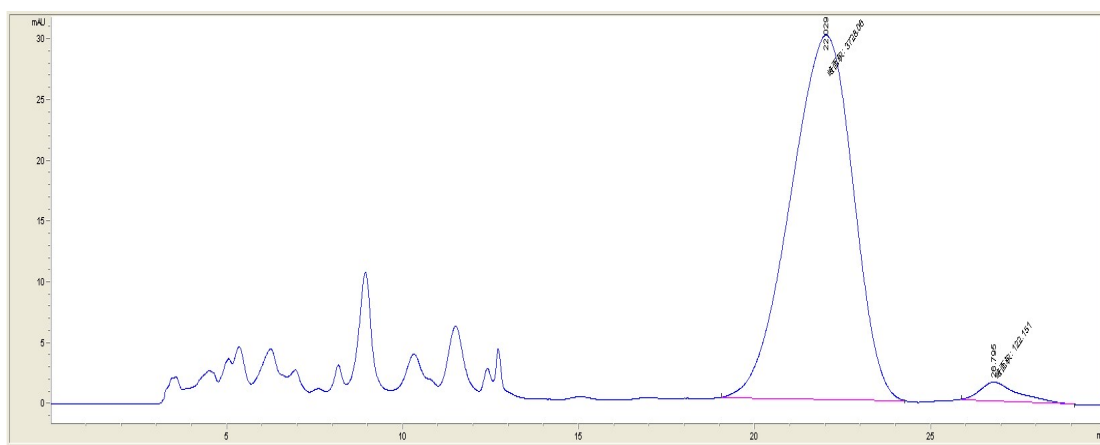

| Peak # | RetTime [min] | Area [mAU*s] | Height [mAU] | Width [min] | Symmetry | Area [%] |
|--------|---------------|--------------|--------------|-------------|----------|----------|
| 1      | 22.029        | 3728.1       | 30.1         | 2.0669      | 1.277    | 96.827   |
| 2      | 26.795        | 122.2        | 1.6          | 1.2674      | 0.578    | 3.173    |

**Figure S366. HPLC Spectra of 80**

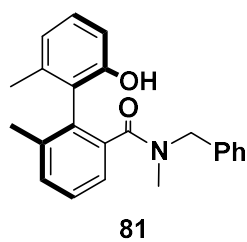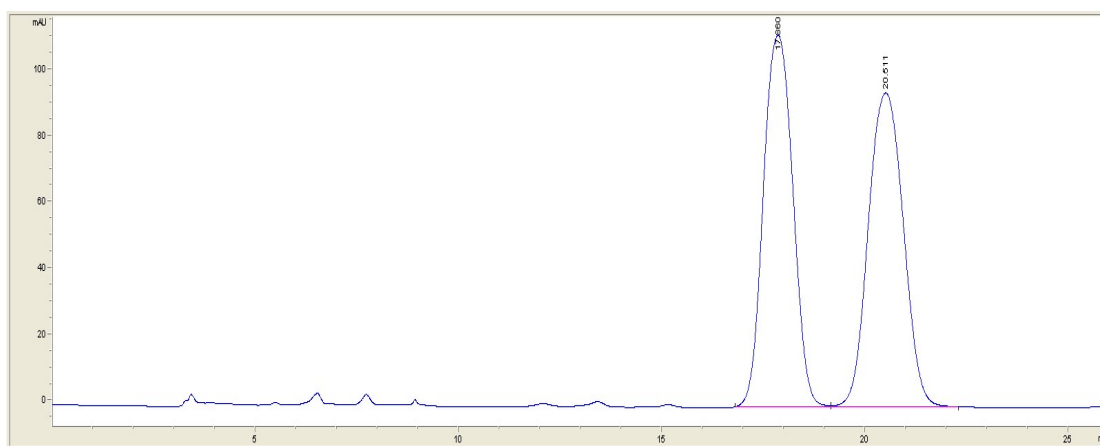

| Peak # | RetTime [min] | Area [mAU*s] | Height [mAU] | Width [min] | Symmetry | Area [%] |
|--------|---------------|--------------|--------------|-------------|----------|----------|
| 1      | 17.86         | 5663.7       | 112.3        | 0.8165      | 0.945    | 49.920   |
| 2      | 20.511        | 5681.8       | 94.8         | 0.9691      | 0.952    | 50.080   |

**Figure S367. HPLC Spectra of racemic 81**

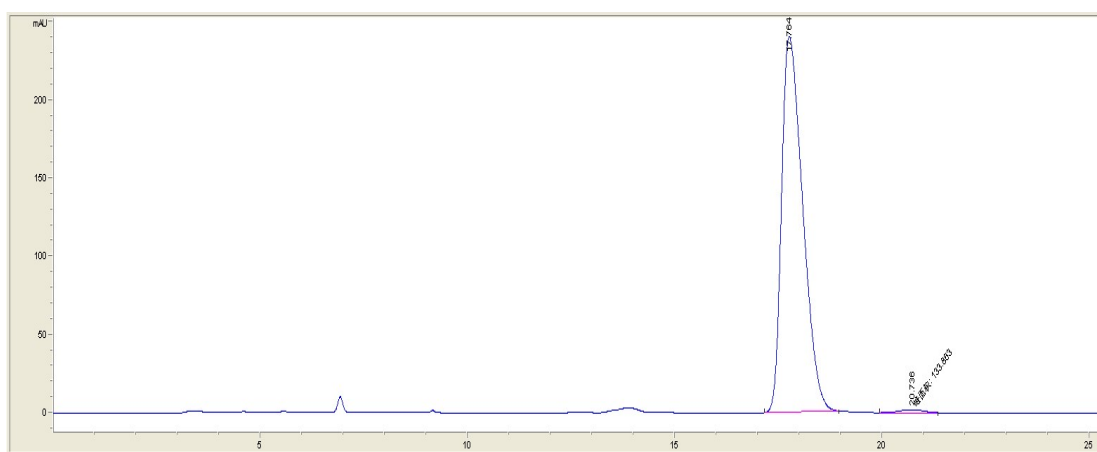

| Peak # | RetTime [min] | Area [mAU*s] | Height [mAU] | Width [min] | Symmetry | Area [%] |
|--------|---------------|--------------|--------------|-------------|----------|----------|
| 1      | 17.764        | 8547.8       | 240.4        | 0.5528      | 0.543    | 98.458   |
| 2      | 20.736        | 133.9        | 2.7          | 0.8328      | 0.899    | 1.542    |

**Figure S368. HPLC Spectra of 81**

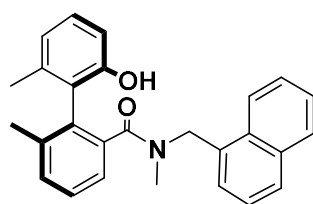

82

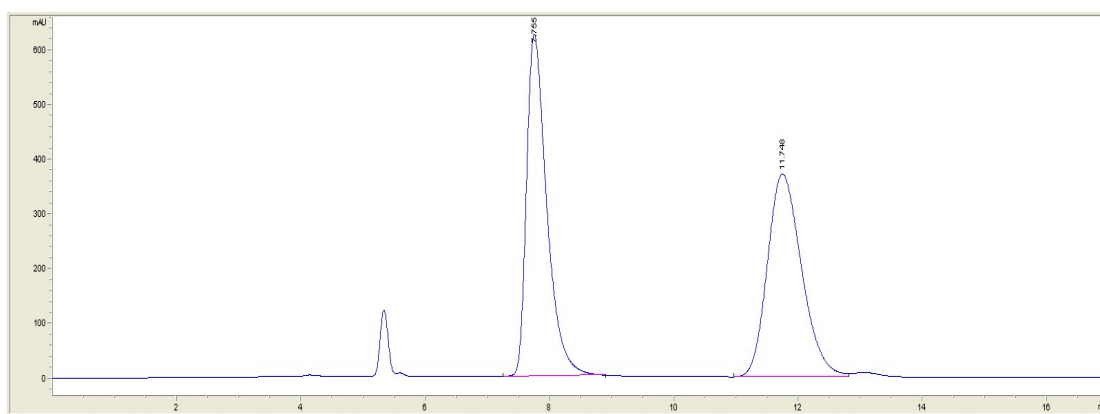

| Peak # | RetTime [min] | Area [mAU*s] | Height [mAU] | Width [min] | Symmetry | Area [%] |
|--------|---------------|--------------|--------------|-------------|----------|----------|
| 1      | 7.755         | 14191.1      | 625          | 0.3449      | 0.576    | 49.971   |
| 2      | 11.748        | 14207.2      | 371.2        | 0.5926      | 0.748    | 50.029   |

Figure S369. HPLC Spectra of racemic 82

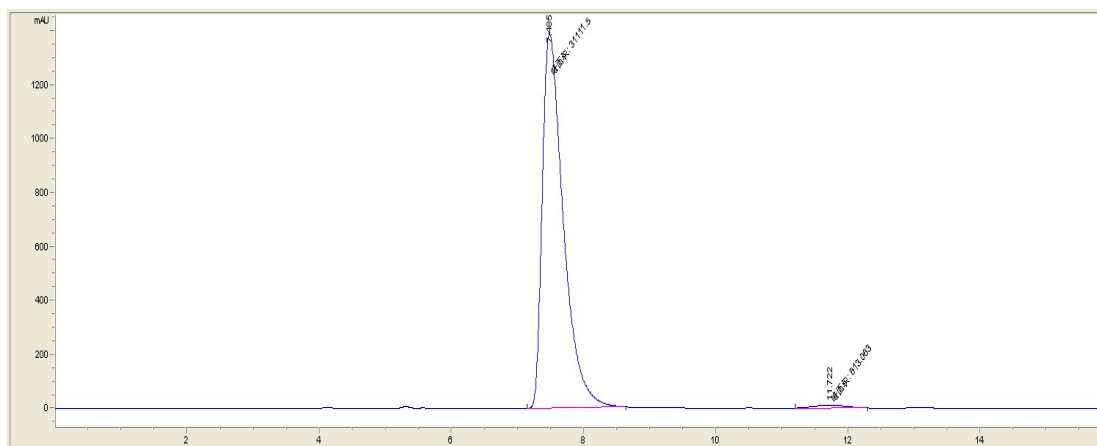

| Peak # | RetTime [min] | Area [mAU*s] | Height [mAU] | Width [min] | Symmetry | Area [%] |
|--------|---------------|--------------|--------------|-------------|----------|----------|
| 1      | 7.485         | 31111.5      | 1393.3       | 0.3722      | 0.512    | 98.068   |
| 2      | 11.722        | 613.1        | 14.6         | 0.6981      | 1.086    | 1.932    |

Figure S370. HPLC Spectra of 82

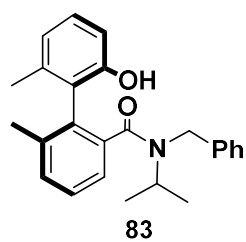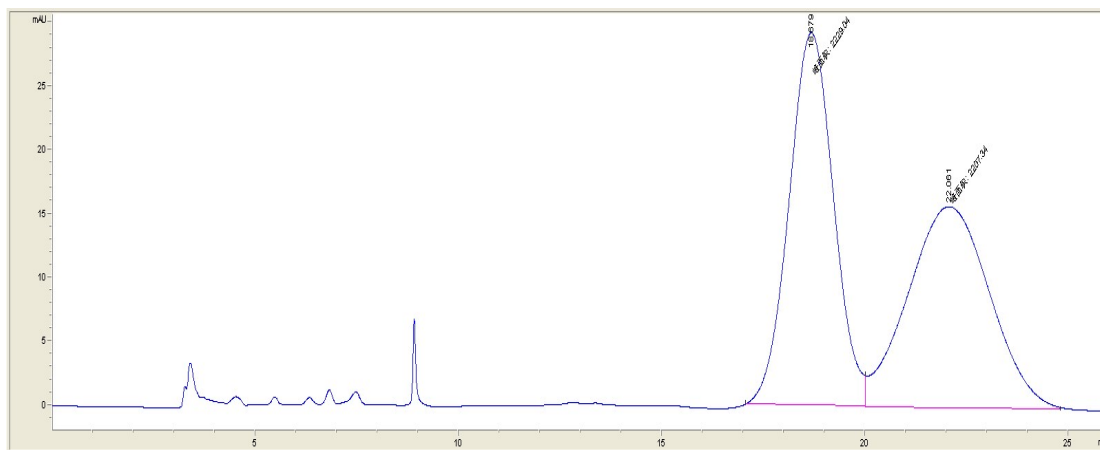

| Peak # | RetTime [min] | Area [mAU*s] | Height [mAU] | Width [min] | Symmetry | Area [%] |
|--------|---------------|--------------|--------------|-------------|----------|----------|
| 1      | 18.679        | 2229         | 29.2         | 1.2722      | 0.978    | 50.245   |
| 2      | 22.061        | 2207.3       | 15.8         | 2.3356      | 0.974    | 49.755   |

**Figure S371. HPLC Spectra of racemic 83**

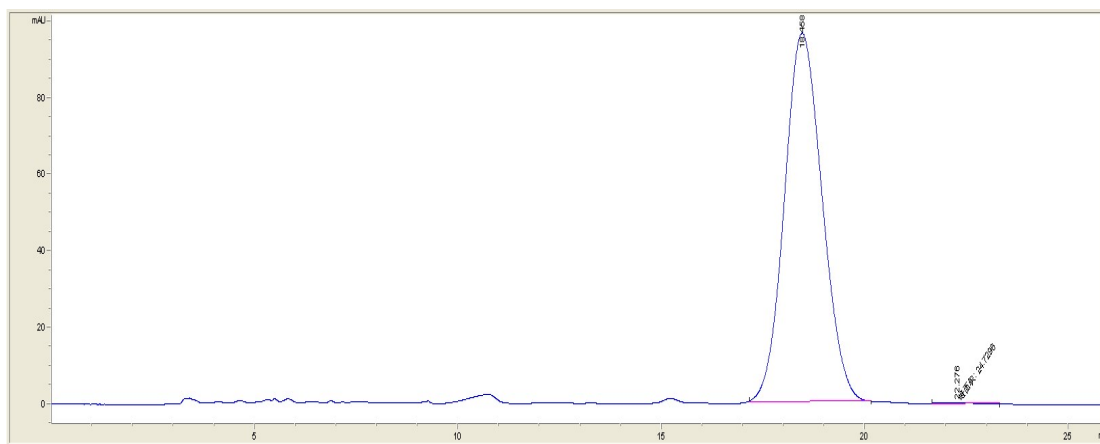

| Peak # | RetTime [min] | Area [mAU*s] | Height [mAU] | Width [min] | Symmetry | Area [%] |
|--------|---------------|--------------|--------------|-------------|----------|----------|
| 1      | 18.458        | 6239.6       | 96.4         | 1.0012      | 0.858    | 99.605   |
| 2      | 22.276        | 24.7         | 3.4E-1       | 0.8441      | 0        | 0.395    |

**Figure S372. HPLC Spectra of 83**

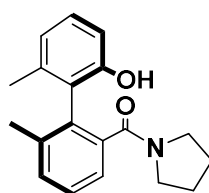

84

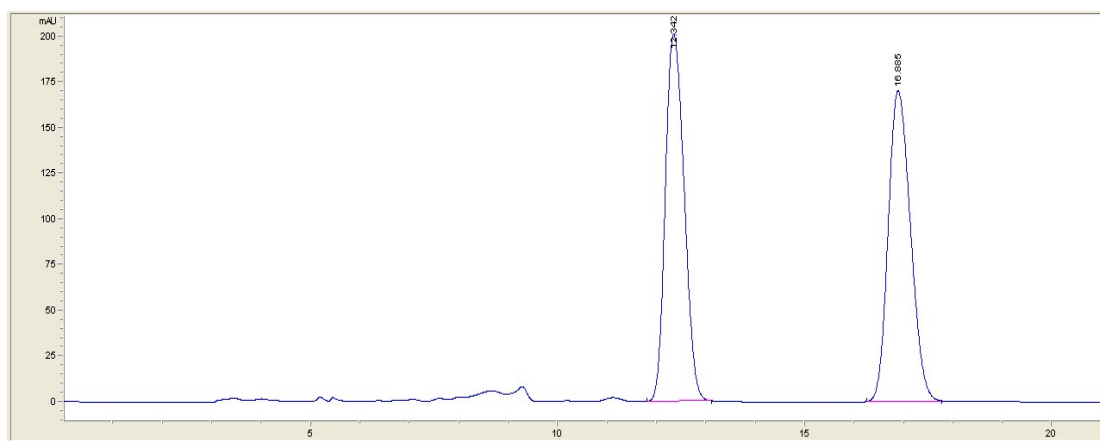

| Peak # | RetTime [min] | Area [mAU*s] | Height [mAU] | Width [min] | Symmetry | Area [%] |
|--------|---------------|--------------|--------------|-------------|----------|----------|
| 1      | 12.342        | 5339         | 201.2        | 0.4256      | 0.761    | 49.991   |
| 2      | 16.885        | 5340.9       | 170.3        | 0.494       | 0.768    | 50.009   |

Figure S373. HPLC Spectra of racemic 84

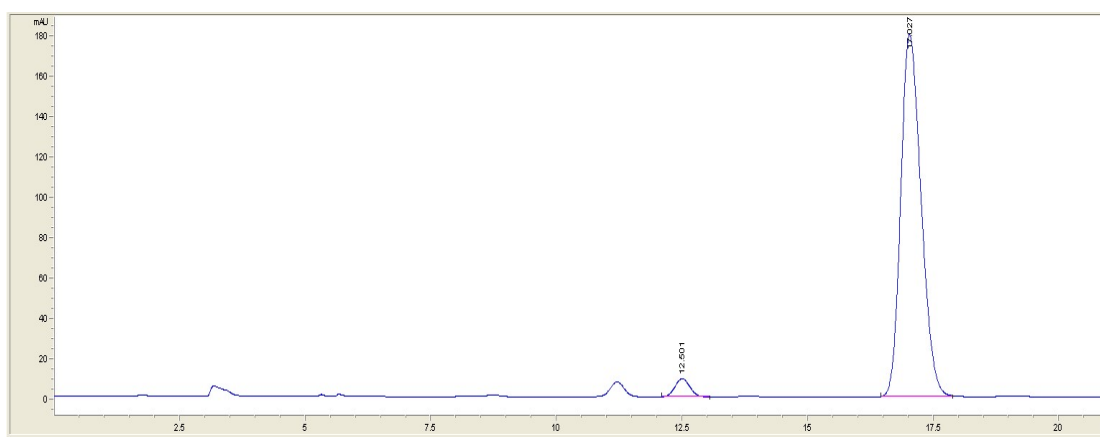

| Peak # | RetTime [min] | Area [mAU*s] | Height [mAU] | Width [min] | Symmetry | Area [%] |
|--------|---------------|--------------|--------------|-------------|----------|----------|
| 1      | 12.501        | 186.3        | 9            | 0.3224      | 0.934    | 3.558    |
| 2      | 17.027        | 5051.3       | 179.6        | 0.4382      | 0.736    | 96.442   |

Figure S374. HPLC Spectra of 84



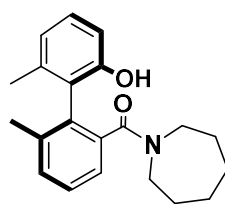

85

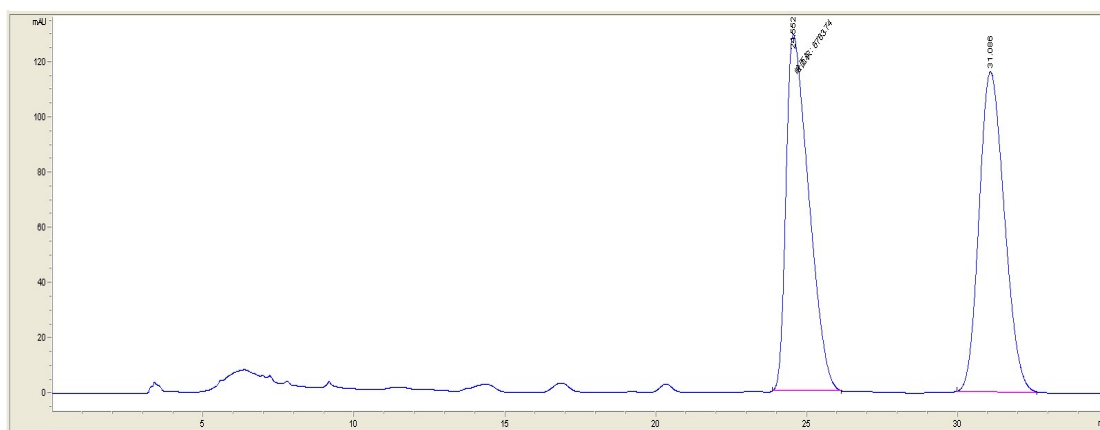

| Peak # | RetTime [min] | Area [mAU*s] | Height [mAU] | Width [min] | Symmetry | Area [%] |
|--------|---------------|--------------|--------------|-------------|----------|----------|
| 1      | 24.552        | 6763.7       | 129.3        | 0.8719      | 0.463    | 50.022   |
| 2      | 31.086        | 6757.9       | 115.9        | 0.912       | 0.784    | 49.978   |

Figure S375. HPLC Spectra of racemic 85

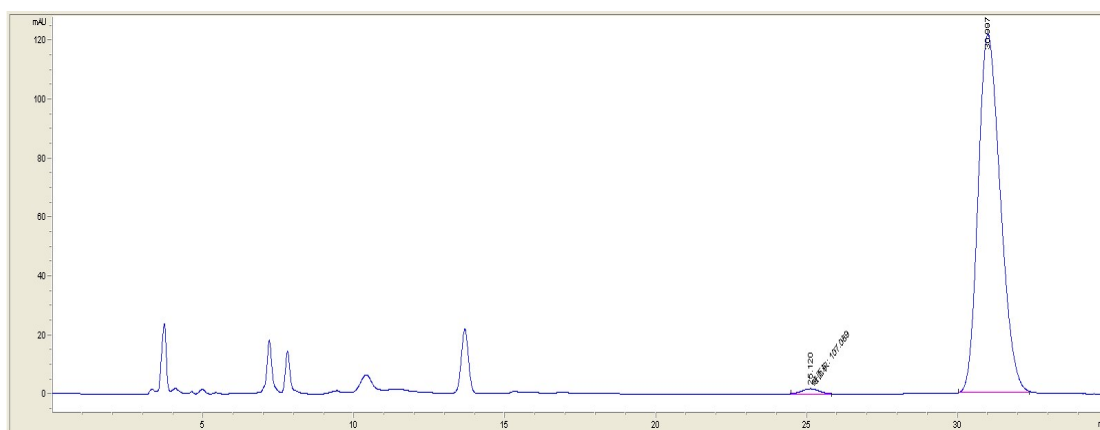

| Peak # | RetTime [min] | Area [mAU*s] | Height [mAU] | Width [min] | Symmetry | Area [%] |
|--------|---------------|--------------|--------------|-------------|----------|----------|
| 1      | 25.12         | 107.1        | 2.2          | 0.8031      | 0.957    | 1.687    |
| 2      | 30.997        | 6242.4       | 121.7        | 0.8025      | 0.741    | 98.313   |

Figure S376. HPLC Spectra of 85

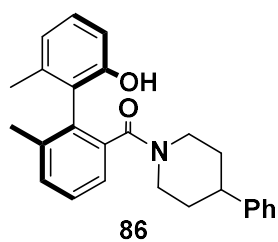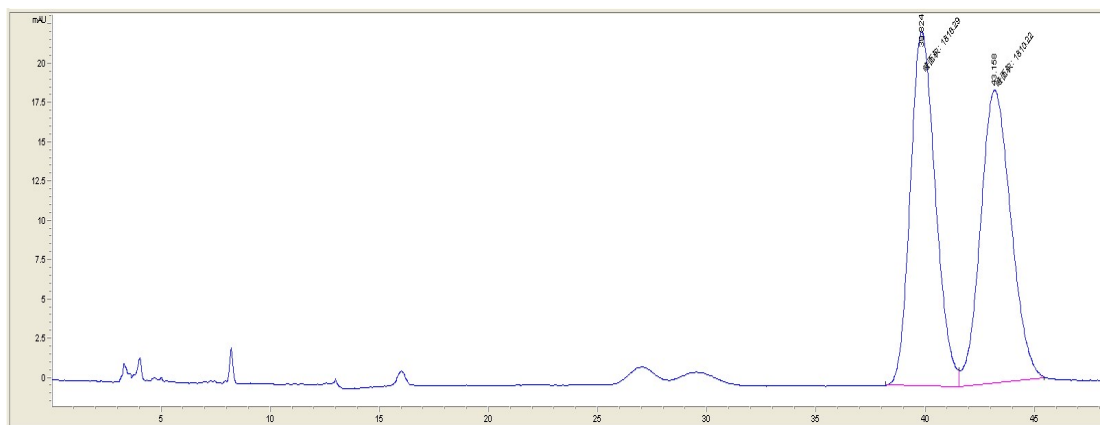

| Peak # | RetTime [min] | Area [mAU*s] | Height [mAU] | Width [min] | Symmetry | Area [%] |
|--------|---------------|--------------|--------------|-------------|----------|----------|
| 1      | 39.824        | 1816.3       | 22.6         | 1.3422      | 0.796    | 50.084   |
| 2      | 43.158        | 1810.2       | 18.7         | 1.6148      | 0.831    | 49.916   |

**Figure S377. HPLC Spectra of racemic 86**

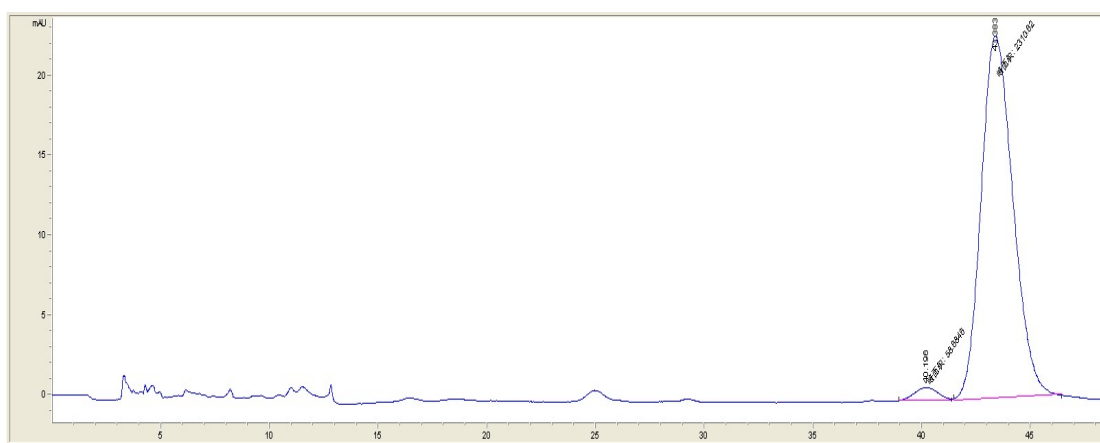

| Peak # | RetTime [min] | Area [mAU*s] | Height [mAU] | Width [min] | Symmetry | Area [%] |
|--------|---------------|--------------|--------------|-------------|----------|----------|
| 1      | 40.196        | 58.7         | 8E-1         | 1.2254      | 0.961    | 2.477    |
| 2      | 43.383        | 2310.6       | 22.7         | 1.6985      | 0.79     | 97.523   |

**Figure S378. HPLC Spectra of 86**

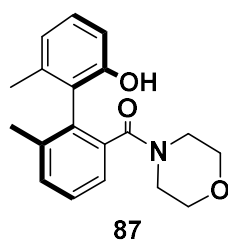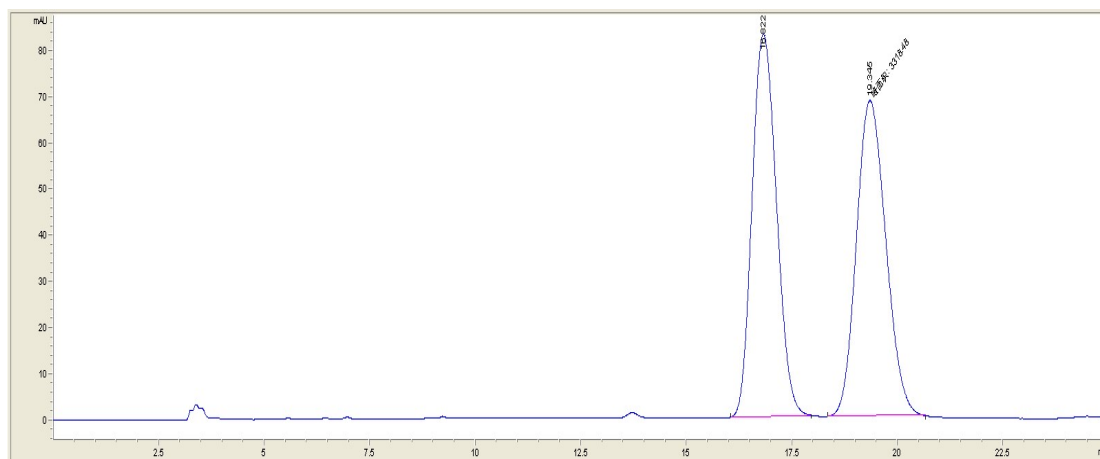

| Peak # | RetTime [min] | Area [mAU*s] | Height [mAU] | Width [min] | Symmetry | Area [%] |
|--------|---------------|--------------|--------------|-------------|----------|----------|
| 1      | 16.822        | 3337.8       | 82.9         | 0.6398      | 0.825    | 50.145   |
| 2      | 19.345        | 3318.5       | 68.4         | 0.8087      | 0.823    | 49.855   |

**Figure S379. HPLC Spectra of racemic 87**

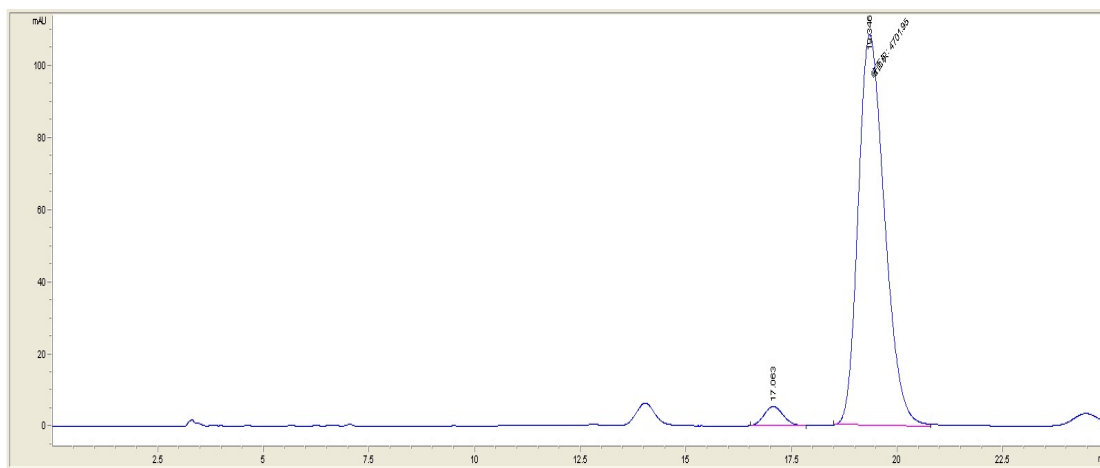

| Peak # | RetTime [min] | Area [mAU*s] | Height [mAU] | Width [min] | Symmetry | Area [%] |
|--------|---------------|--------------|--------------|-------------|----------|----------|
| 1      | 17.063        | 165.7        | 5.3          | 0.4775      | 0.891    | 3.403    |
| 2      | 19.346        | 4701.9       | 108.3        | 0.7235      | 0.731    | 96.597   |

**Figure S380 HPLC Spectra of 87**

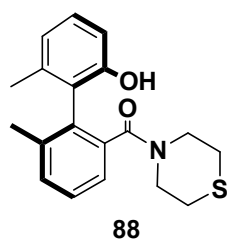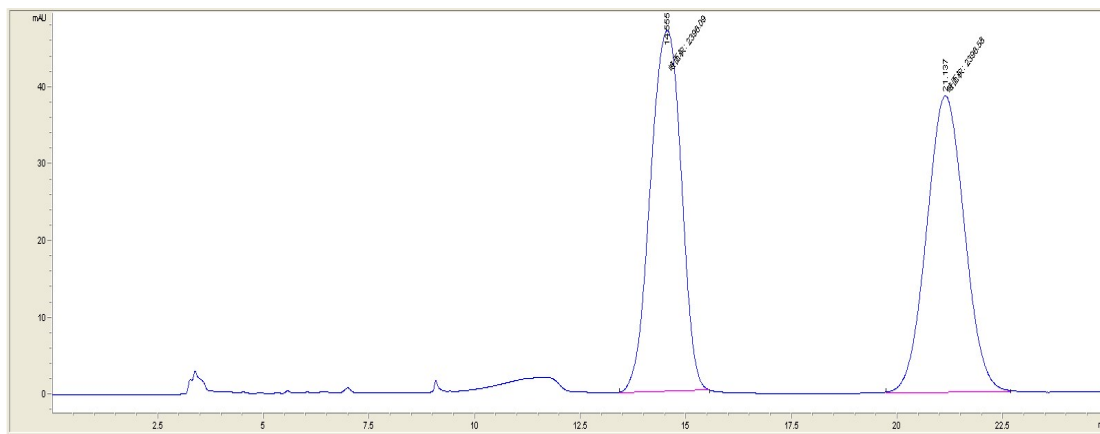

| Peak # | RetTime [min] | Area [mAU*s] | Height [mAU] | Width [min] | Symmetry | Area [%] |
|--------|---------------|--------------|--------------|-------------|----------|----------|
| 1      | 14.555        | 2396.1       | 47           | 0.8494      | 1.157    | 49.995   |
| 2      | 21.137        | 2396.6       | 38.6         | 1.0358      | 0.956    | 50.005   |

**Figure S381. HPLC Spectra of racemic 88**

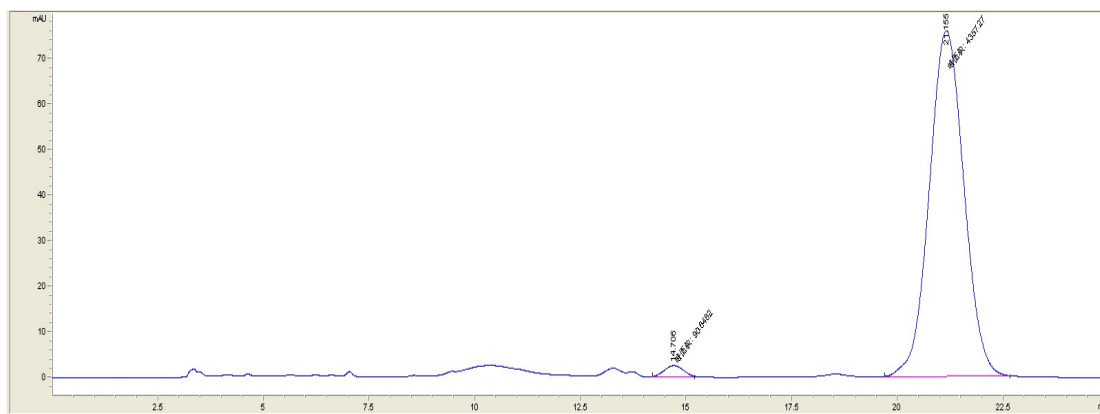

| Peak # | RetTime [min] | Area [mAU*s] | Height [mAU] | Width [min] | Symmetry | Area [%] |
|--------|---------------|--------------|--------------|-------------|----------|----------|
| 1      | 14.706        | 90.6         | 2.7          | 0.5635      | 0.964    | 2.038    |
| 2      | 21.155        | 4357.3       | 76           | 0.9551      | 0.945    | 97.962   |

**Figure S382. HPLC Spectra of 88**

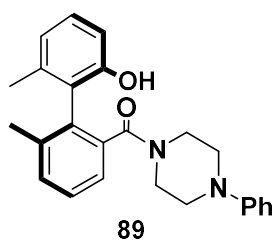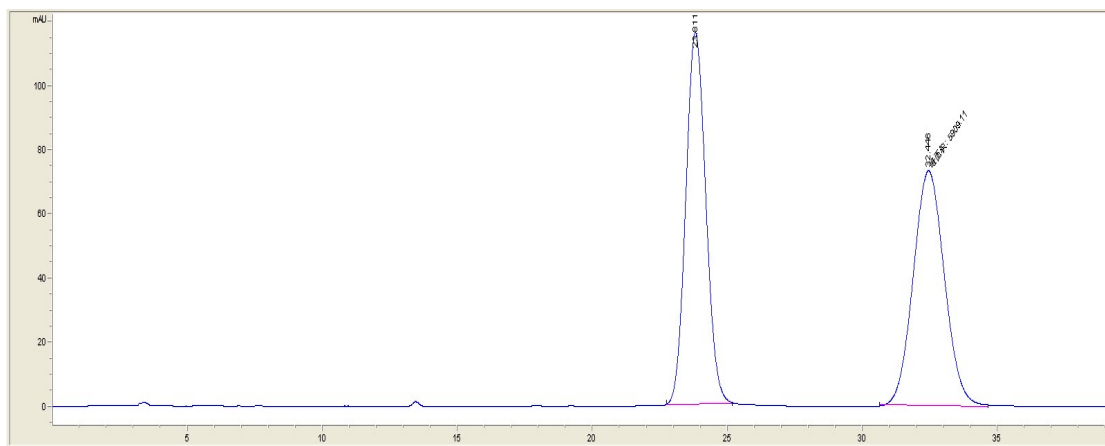

| Peak # | RetTime [min] | Area [mAU*s] | Height [mAU] | Width [min] | Symmetry | Area [%] |
|--------|---------------|--------------|--------------|-------------|----------|----------|
| 1      | 23.811        | 5994.3       | 116.1        | 0.8086      | 0.891    | 50.358   |
| 2      | 32.446        | 5909.1       | 73.4         | 1.3426      | 0.933    | 49.642   |

**Figure S383. HPLC Spectra of racemic 89**

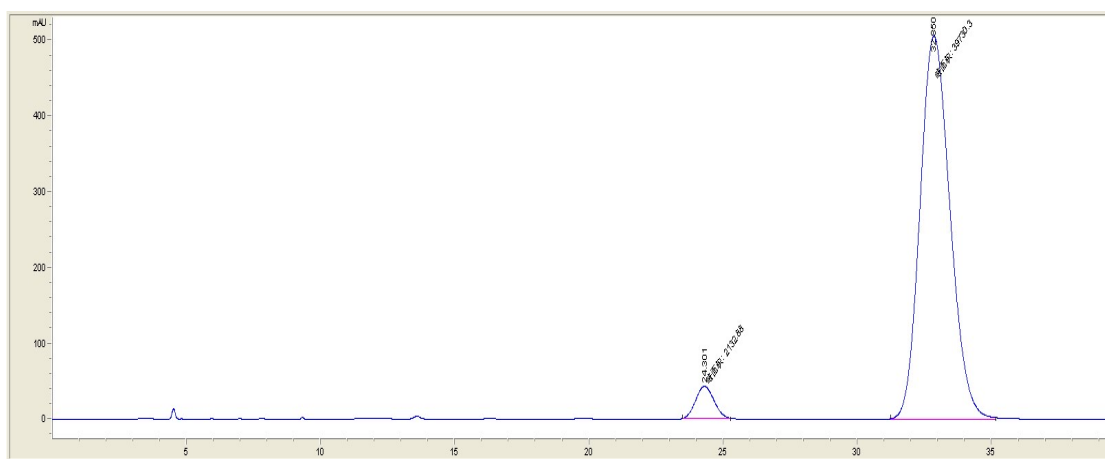

| Peak # | RetTime [min] | Area [mAU*s] | Height [mAU] | Width [min] | Symmetry | Area [%] |
|--------|---------------|--------------|--------------|-------------|----------|----------|
| 1      | 24.301        | 2132.9       | 43.6         | 0.8155      | 0.908    | 5.095    |
| 2      | 32.85         | 39730.3      | 507.3        | 1.3054      | 0.833    | 94.905   |

**Figure S384. HPLC Spectra of 89**

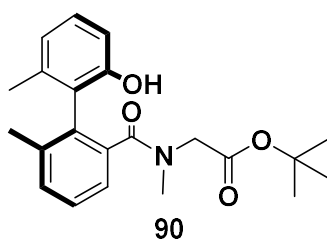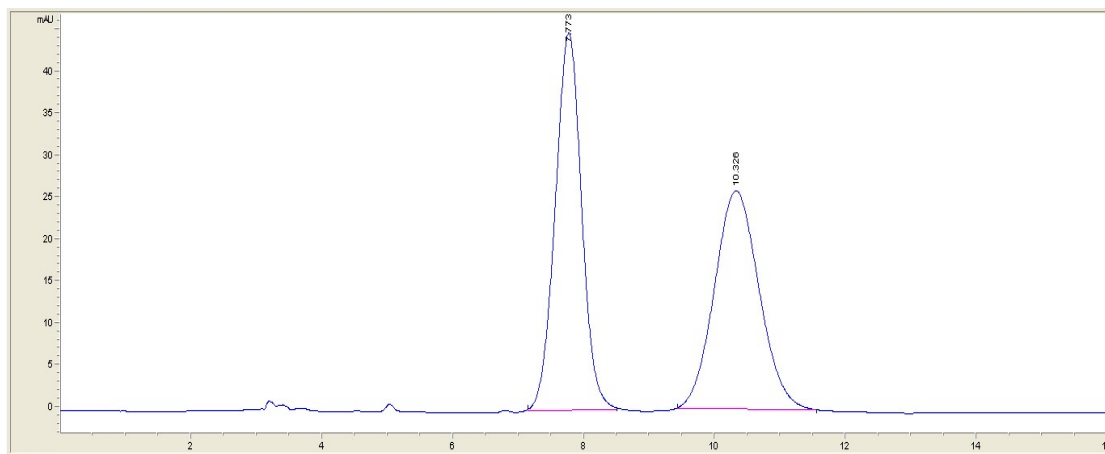

| Peak # | RetTime [min] | Area [mAU*s] | Height [mAU] | Width [min] | Symmetry | Area [%] |
|--------|---------------|--------------|--------------|-------------|----------|----------|
| 1      | 7.773         | 1264.7       | 45           | 0.4316      | 1.034    | 50.343   |
| 2      | 10.326        | 1247.5       | 26.1         | 0.7311      | 0.896    | 49.657   |

**Figure S385. HPLC Spectra of racemic 90**

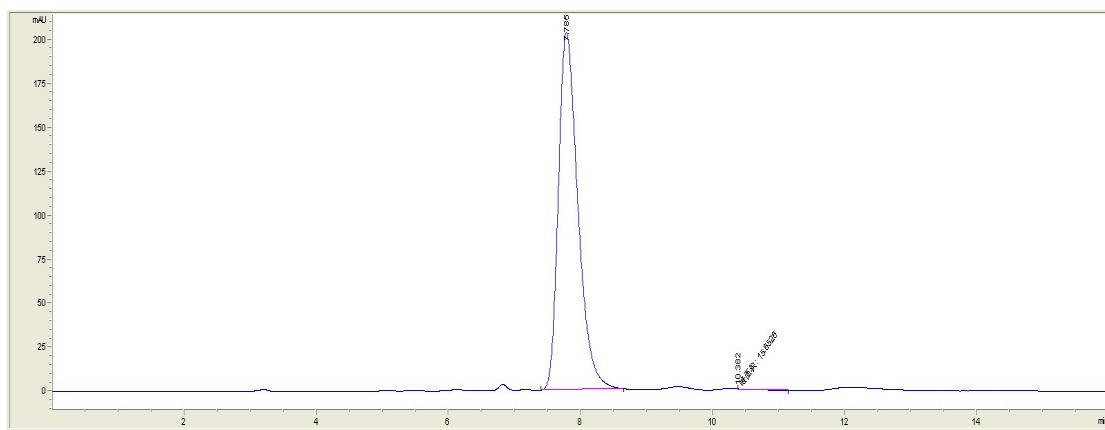

| Peak # | RetTime [min] | Area [mAU*s] | Height [mAU] | Width [min] | Symmetry | Area [%] |
|--------|---------------|--------------|--------------|-------------|----------|----------|
| 1      | 7.785         | 4185.5       | 203.3        | 0.3142      | 0.647    | 99.627   |
| 2      | 10.382        | 15.7         | 8.7E-1       | 0.2137      | 0        | 0.373    |

**Figure S386. HPLC Spectra of 90**

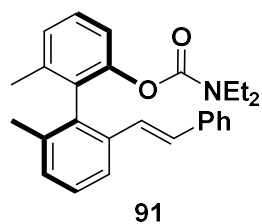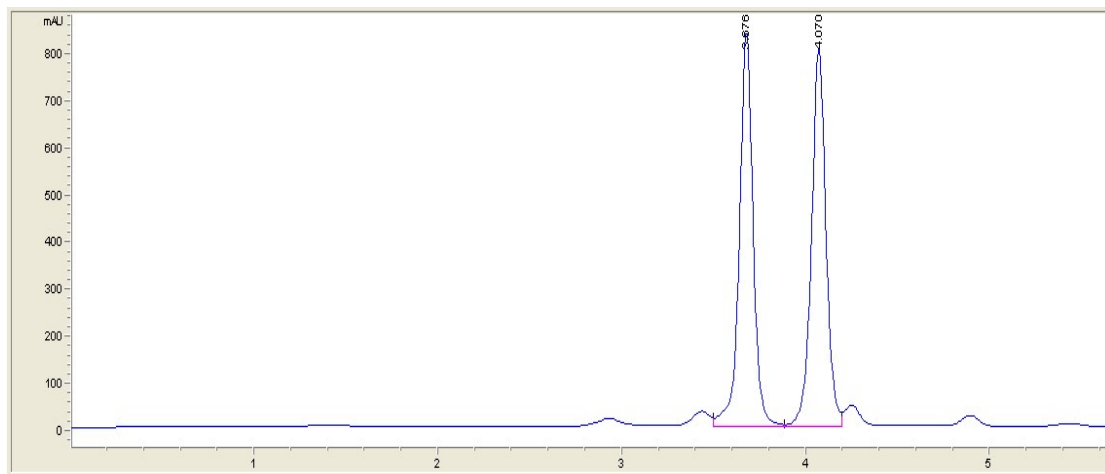

| Peak # | RetTime [min] | Area [mAU*s] | Height [mAU] | Width [min] | Symmetry | Area [%] |
|--------|---------------|--------------|--------------|-------------|----------|----------|
| 1      | 3.676         | 4361.7       | 837.9        | 0.0767      | 1.004    | 49.763   |
| 2      | 4.07          | 4403.1       | 806.3        | 0.0837      | 0.978    | 50.237   |

**Figure S387. HPLC Spectra of racemic 91**

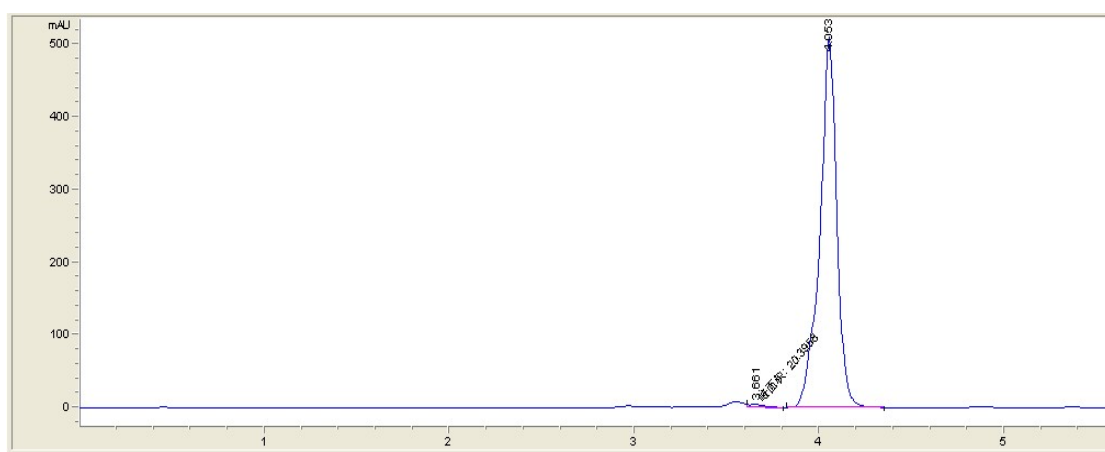

| Peak # | RetTime [min] | Area [mAU*s] | Height [mAU] | Width [min] | Symmetry | Area [%] |
|--------|---------------|--------------|--------------|-------------|----------|----------|
| 1      | 3.661         | 20.4         | 3.3          | 0.1032      | 0.573    | 0.623    |
| 2      | 4.053         | 3251.2       | 510.7        | 0.0923      | 1.199    | 99.377   |

**Figure S388. HPLC Spectra of 91**

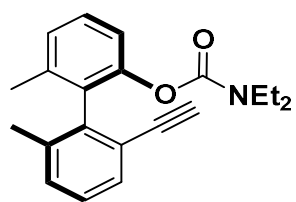

92

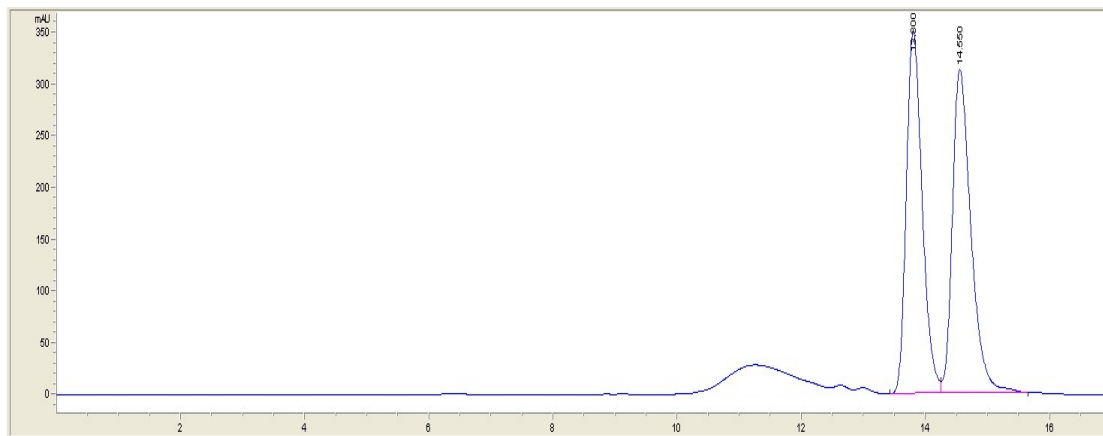

| Peak # | RetTime [min] | Area [mAU*s] | Height [mAU] | Width [min] | Symmetry | Area [%] |
|--------|---------------|--------------|--------------|-------------|----------|----------|
| 1      | 13.8          | 6243.5       | 350.8        | 0.2736      | 0.725    | 48.929   |
| 2      | 14.55         | 6516.9       | 312.9        | 0.317       | 0.616    | 51.071   |

Figure S389. HPLC Spectra of racemic 92

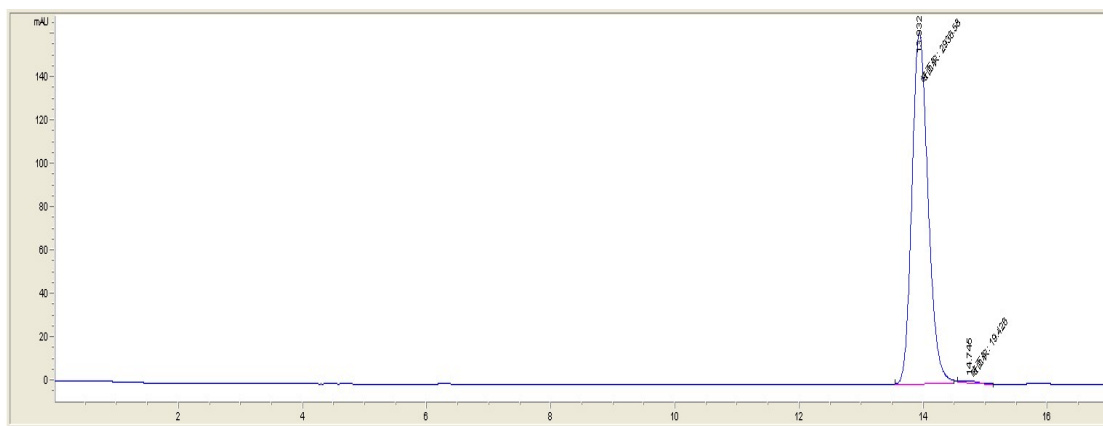

| Peak # | RetTime [min] | Area [mAU*s] | Height [mAU] | Width [min] | Symmetry | Area [%] |
|--------|---------------|--------------|--------------|-------------|----------|----------|
| 1      | 13.932        | 2936.6       | 162          | 0.3021      | 0.806    | 99.343   |
| 2      | 14.745        | 19.4         | 9.7E-1       | 0.3349      | 0.401    | 0.657    |

Figure S390. HPLC Spectra of 92



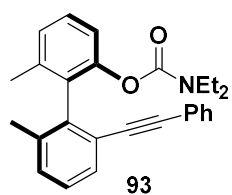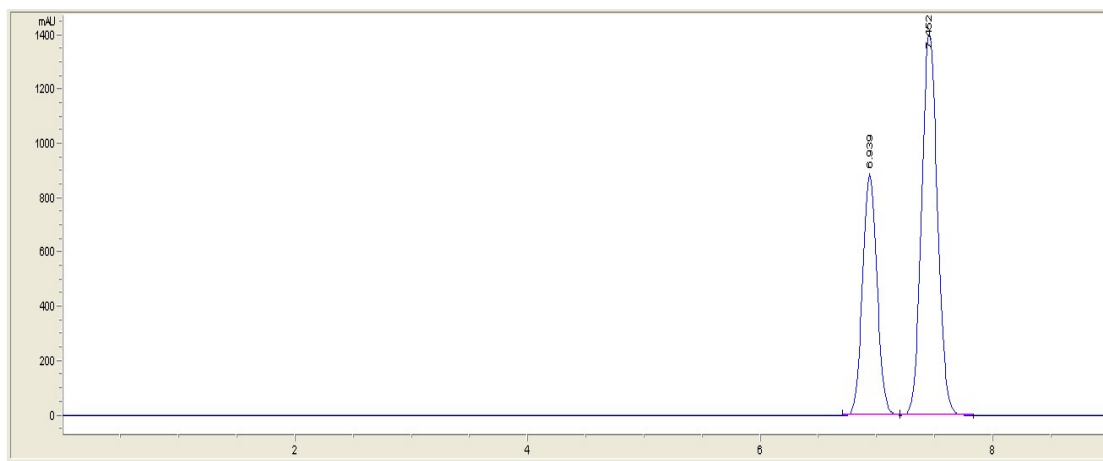

| Peak # | RetTime [min] | Area [mAU*s] | Height [mAU] | Width [min] | Symmetry | Area [%] |
|--------|---------------|--------------|--------------|-------------|----------|----------|
| 1      | 6.939         | 7670.1       | 890          | 0.1345      | 0.933    | 36.476   |
| 2      | 7.452         | 13357.6      | 1405.7       | 0.1489      | 0.903    | 63.524   |

**Figure S391.** HPLC Spectra of racemic **93**

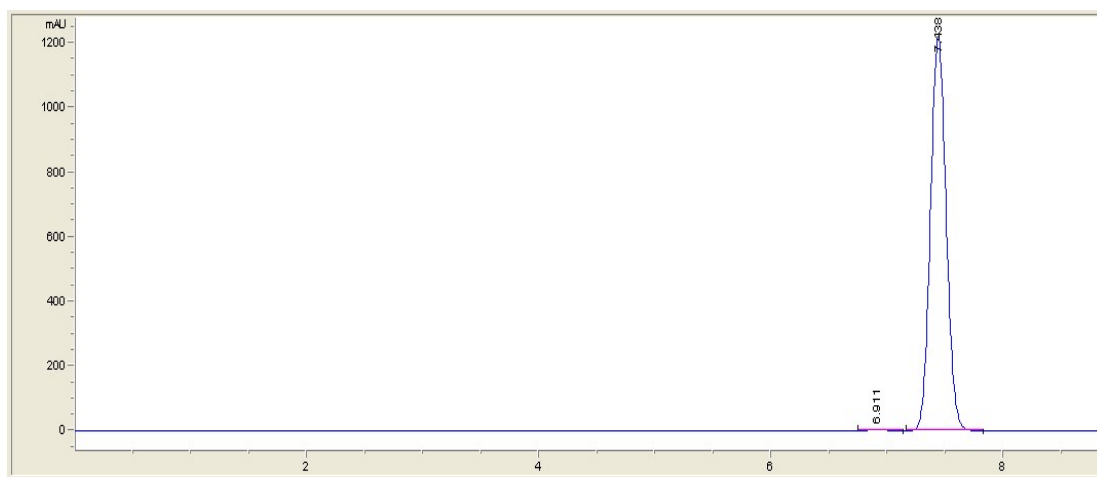

| Peak # | RetTime [min] | Area [mAU*s] | Height [mAU] | Width [min] | Symmetry | Area [%] |
|--------|---------------|--------------|--------------|-------------|----------|----------|
| 1      | 6.911         | 47.6         | 5.6          | 0.133       | 0.95     | 0.416    |
| 2      | 7.438         | 11384.1      | 1218.6       | 0.145       | 0.903    | 99.584   |

**Figure S392.** HPLC Spectra of **93**

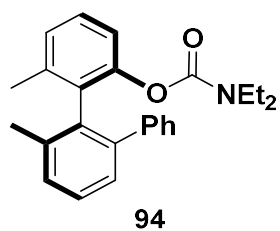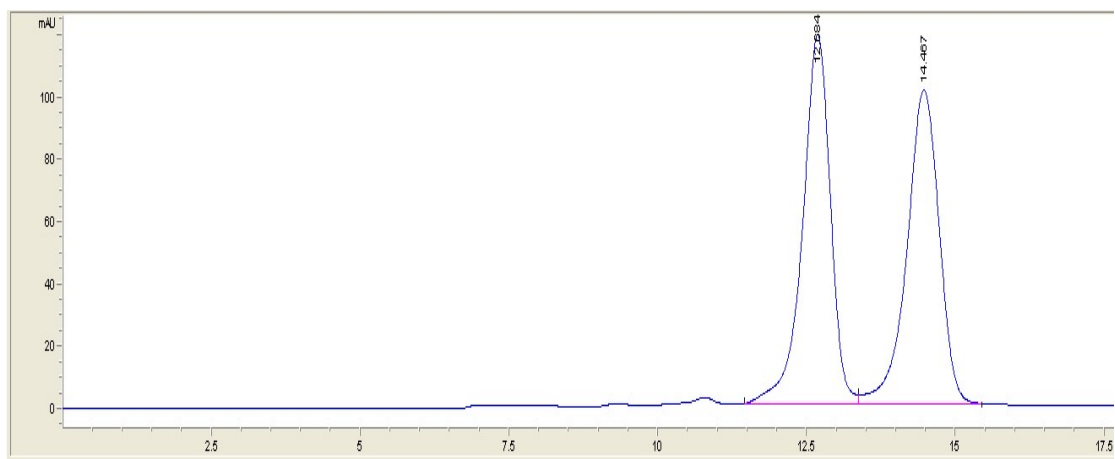

| Peak # | RetTime [min] | Area [mAU*s] | Height [mAU] | Width [min] | Symmetry | Area [%] |
|--------|---------------|--------------|--------------|-------------|----------|----------|
| 1      | 12.684        | 3876.2       | 118.9        | 0.4904      | 1.206    | 50.395   |
| 2      | 14.467        | 3815.4       | 100.9        | 0.5832      | 1.114    | 49.605   |

**Figure S393. HPLC Spectra of racemic 94**

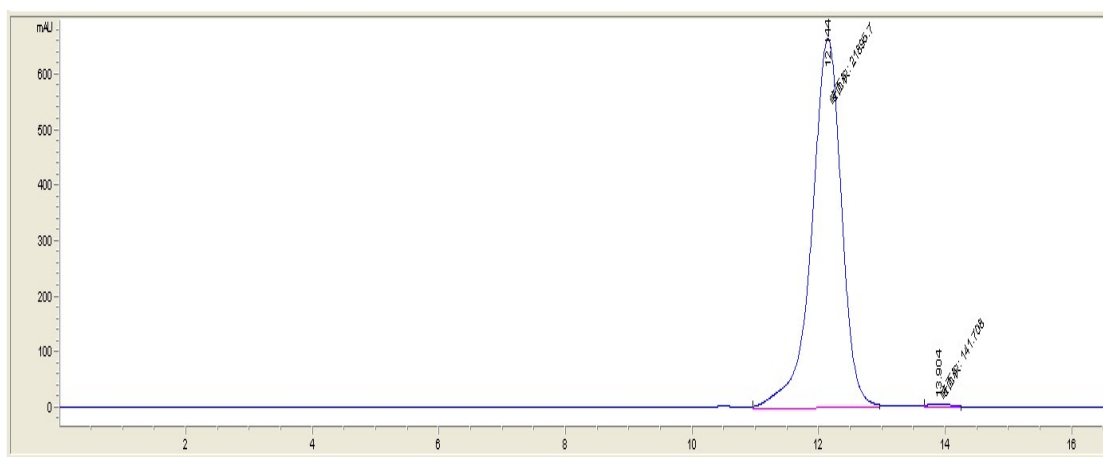

| Peak # | RetTime [min] | Area [mAU*s] | Height [mAU] | Width [min] | Symmetry | Area [%] |
|--------|---------------|--------------|--------------|-------------|----------|----------|
| 1      | 12.144        | 21895.7      | 665.7        | 0.5482      | 1.182    | 99.357   |
| 2      | 13.904        | 141.7        | 5.4          | 0.4371      | 0.799    | 0.643    |

**Figure S394. HPLC Spectra of 94**

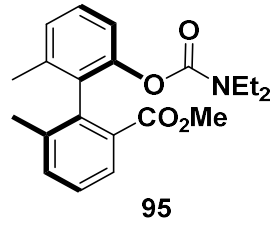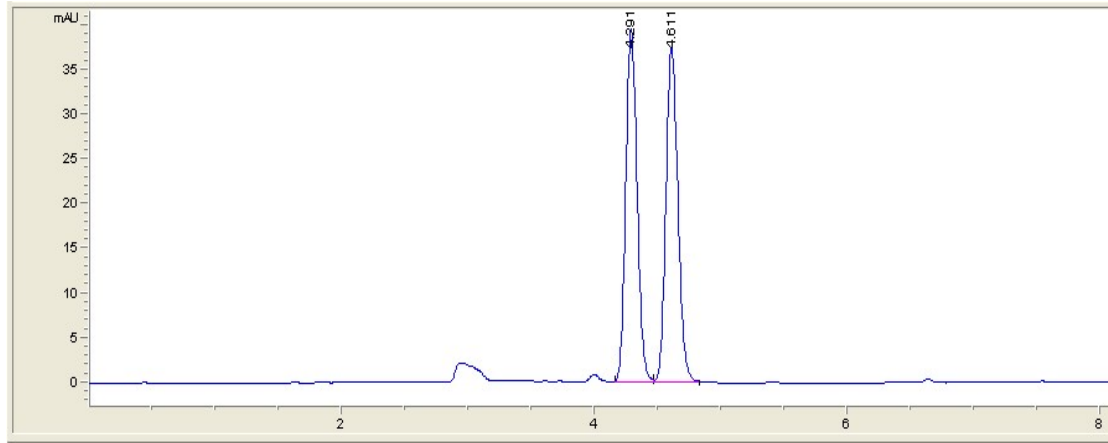

| Peak # | RetTime [min] | Area [mAU*s] | Height [mAU] | Width [min] | Symmetry | Area [%] |
|--------|---------------|--------------|--------------|-------------|----------|----------|
| 1      | 4.291         | 245.8        | 39.7         | 0.0963      | 0.875    | 49.956   |
| 2      | 4.611         | 247.2        | 37.6         | 0.1027      | 0.862    | 50.144   |

**Figure S395.** HPLC Spectra of racemic **95**

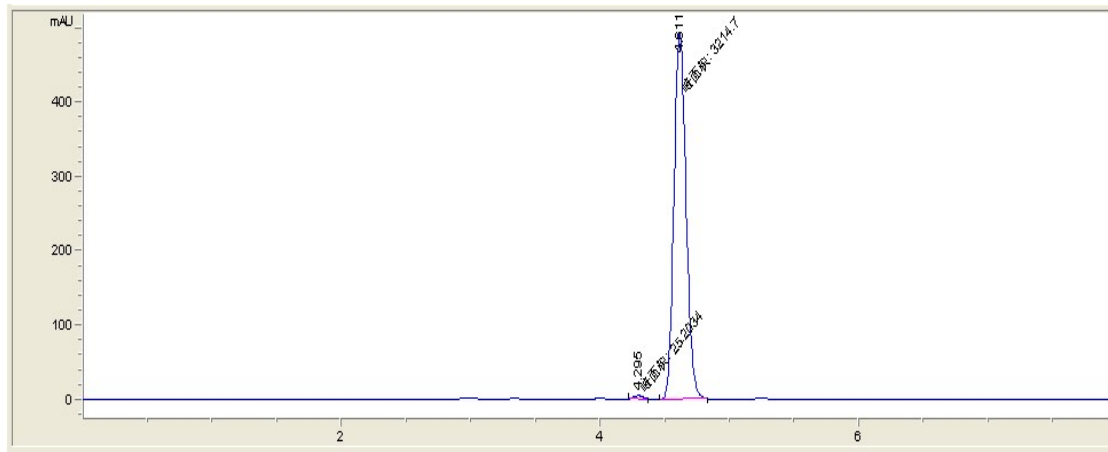

| Peak # | RetTime [min] | Area [mAU*s] | Height [mAU] | Width [min] | Symmetry | Area [%] |
|--------|---------------|--------------|--------------|-------------|----------|----------|
| 1      | 4.295         | 25.2         | 4.7          | 0.0889      | 0.668    | 0.778    |
| 2      | 4.611         | 3214.7       | 495.9        | 0.108       | 0.867    | 99.222   |

**Figure S396.** HPLC Spectra of **95**

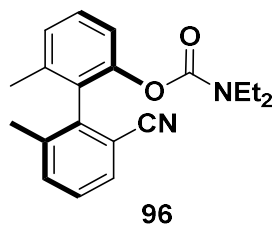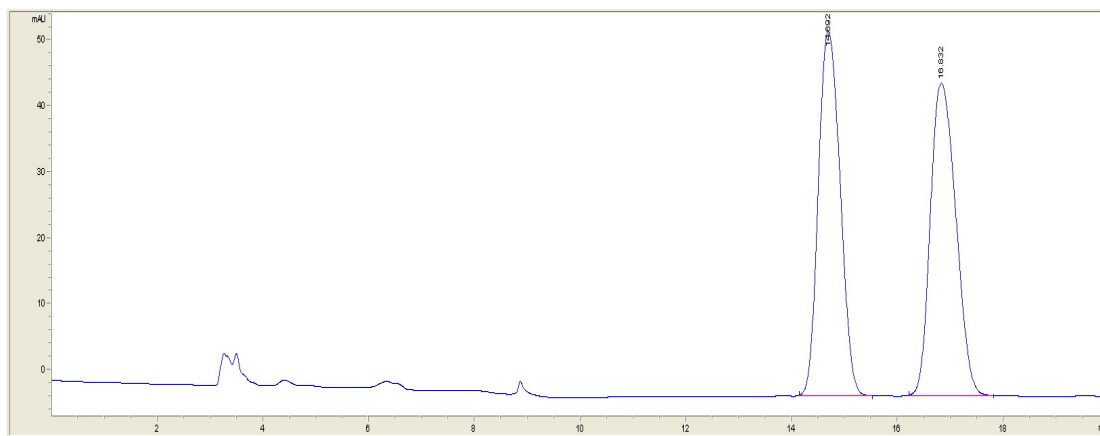

| Peak # | RetTime [min] | Area [mAU*s] | Height [mAU] | Width [min] | Symmetry | Area [%] |
|--------|---------------|--------------|--------------|-------------|----------|----------|
| 1      | 14.692        | 1583.9       | 55.2         | 0.4607      | 0.805    | 49.968   |
| 2      | 16.832        | 1585.9       | 47.4         | 0.5384      | 0.733    | 50.032   |

**Figure S397. HPLC Spectra of racemic 96**

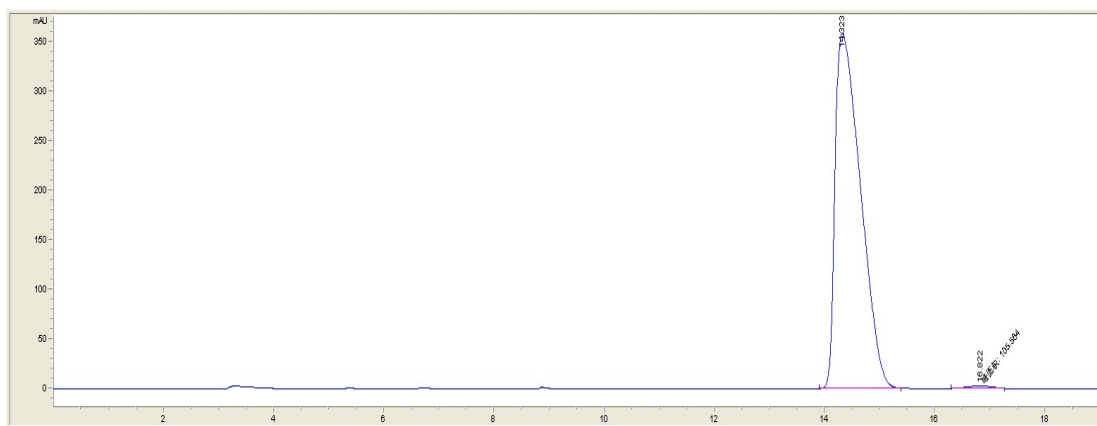

| Peak # | RetTime [min] | Area [mAU*s] | Height [mAU] | Width [min] | Symmetry | Area [%] |
|--------|---------------|--------------|--------------|-------------|----------|----------|
| 1      | 14.323        | 11477.1      | 358.7        | 0.5153      | 0.377    | 99.089   |
| 2      | 16.822        | 105.6        | 2.9          | 0.6127      | 1.078    | 0.911    |

**Figure S398. HPLC Spectra of 96**

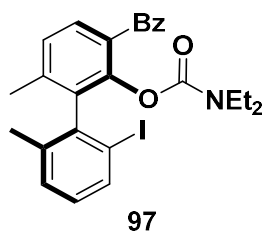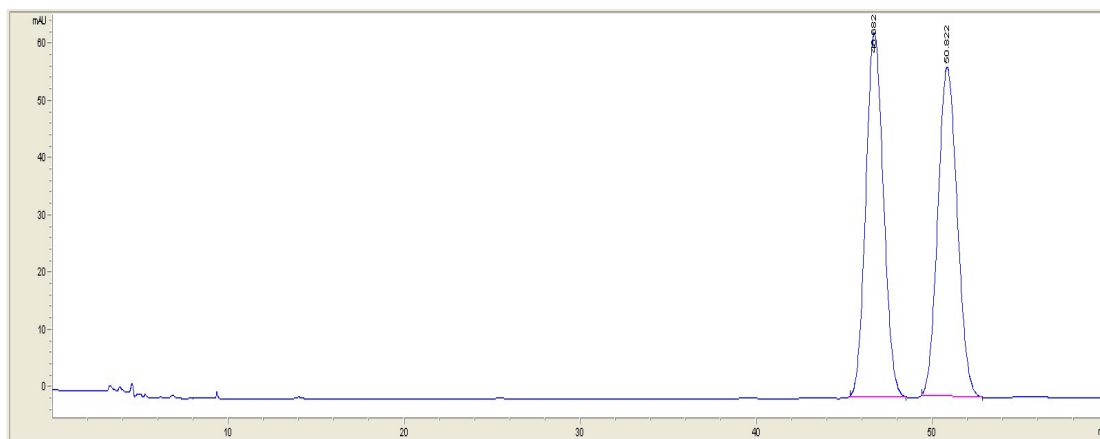

| Peak # | RetTime [min] | Area [mAU*s] | Height [mAU] | Width [min] | Symmetry | Area [%] |
|--------|---------------|--------------|--------------|-------------|----------|----------|
| 1      | 46.682        | 4440.8       | 63.7         | 1.0776      | 0.892    | 50.115   |
| 2      | 50.822        | 4420.5       | 57.5         | 1.1806      | 0.882    | 49.885   |

**Figure S399.** HPLC Spectra of racemic **97**

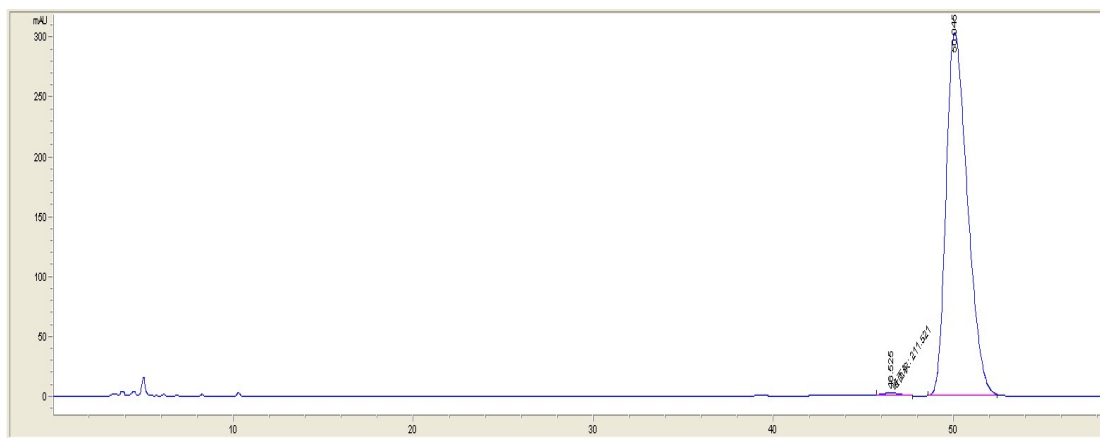

| Peak # | RetTime [min] | Area [mAU*s] | Height [mAU] | Width [min] | Symmetry | Area [%] |
|--------|---------------|--------------|--------------|-------------|----------|----------|
| 1      | 46.525        | 211.5        | 2.8          | 1.2376      | 0.918    | 0.839    |
| 2      | 50.045        | 25006.8      | 303.3        | 1.2719      | 0.641    | 99.161   |

**Figure S400.** HPLC Spectra of **97**

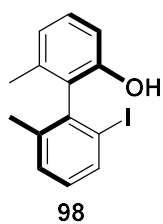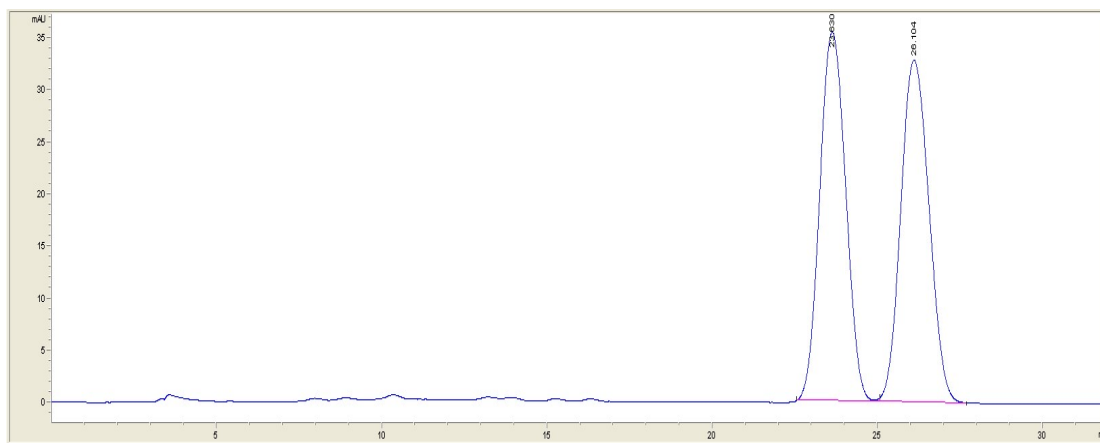

| Peak # | RetTime [min] | Area [mAU*s] | Height [mAU] | Width [min] | Symmetry [%] | Area [%] |
|--------|---------------|--------------|--------------|-------------|--------------|----------|
| 1      | 23.63         | 1934.9       | 35.4         | 0.852       | 0.904        | 49.851   |
| 2      | 26.104        | 1946.5       | 32.8         | 0.93        | 0.852        | 50.149   |

**Figure S401. HPLC Spectra of racemic 98**

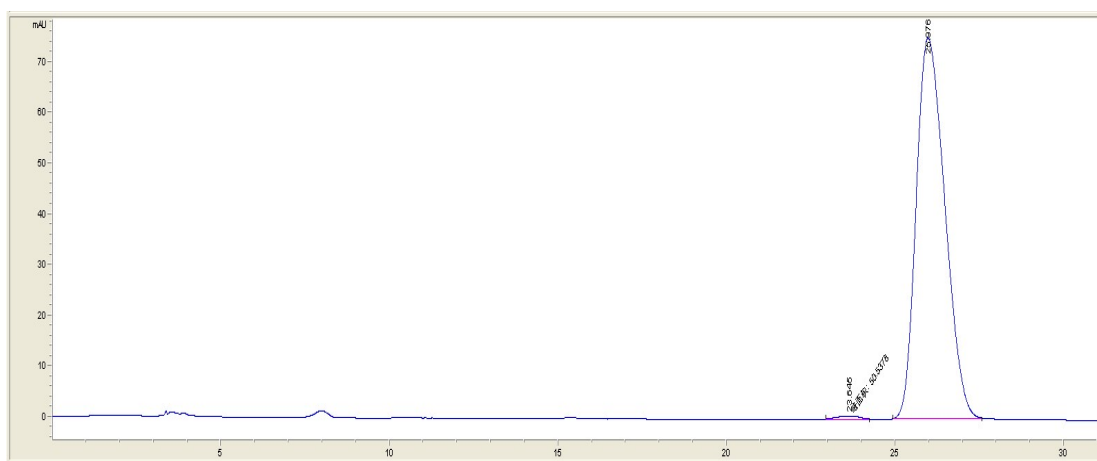

| Peak # | RetTime [min] | Area [mAU*s] | Height [mAU] | Width [min] | Symmetry [%] | Area [%] |
|--------|---------------|--------------|--------------|-------------|--------------|----------|
| 1      | 23.645        | 50.5         | 9.3E-1       | 0.9066      | 1.199        | 1.124    |
| 2      | 25.976        | 4446.8       | 75.2         | 0.9321      | 0.682        | 98.876   |

**Figure S402. HPLC Spectra of 98**

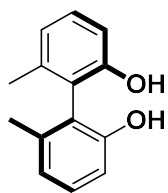

99

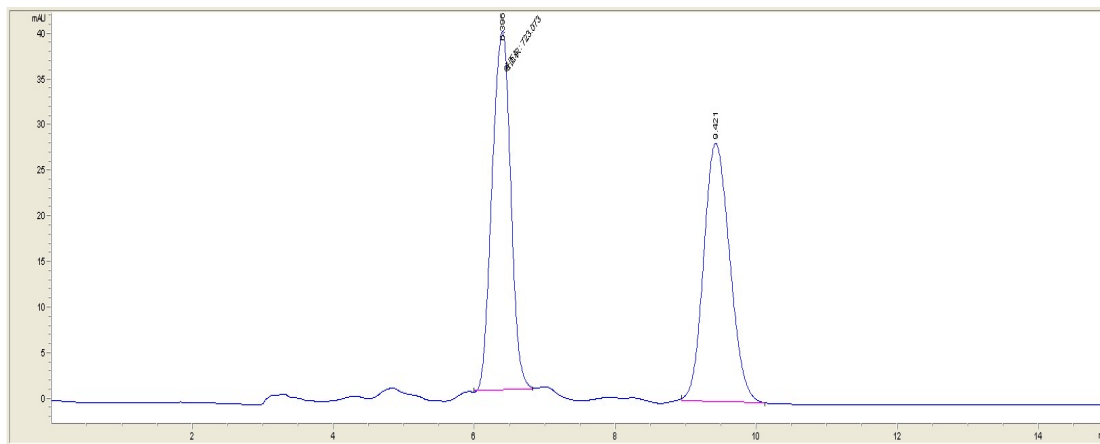

| Peak # | RetTime [min] | Area [mAU*s] | Height [mAU] | Width [min] | Symmetry [%] | Area [%] |
|--------|---------------|--------------|--------------|-------------|--------------|----------|
| 1      | 6.396         | 723.1        | 39.3         | 0.3064      | 1.173        | 49.712   |
| 2      | 9.421         | 731.4        | 28.4         | 0.4048      | 0.816        | 50.288   |

Figure S403. HPLC Spectra of racemic 99

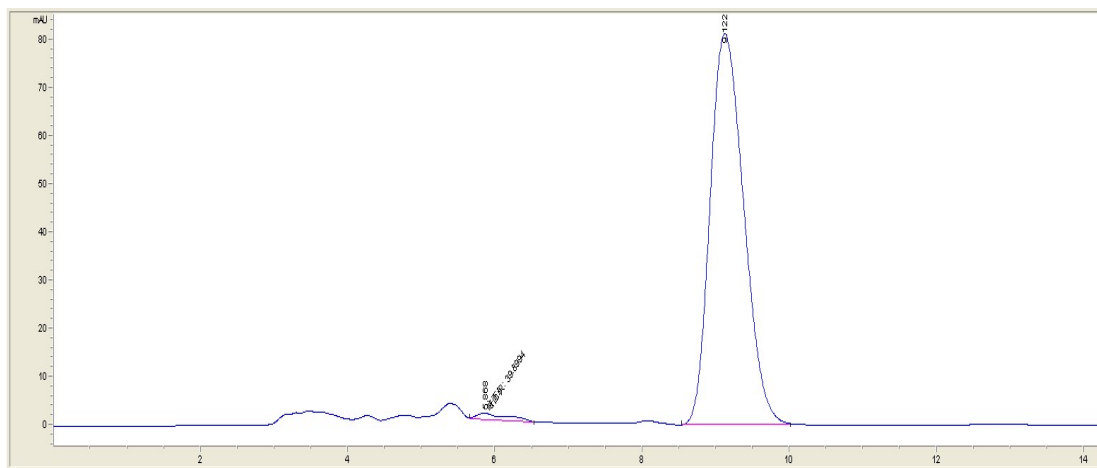

| Peak # | RetTime [min] | Area [mAU*s] | Height [mAU] | Width [min] | Symmetry [%] | Area [%] |
|--------|---------------|--------------|--------------|-------------|--------------|----------|
| 1      | 5.868         | 39.9         | 1.3          | 0.5122      | 0.312        | 1.524    |
| 2      | 9.122         | 2577.5       | 81.2         | 0.5043      | 0.737        | 98.476   |

Figure S404. HPLC Spectra of 99

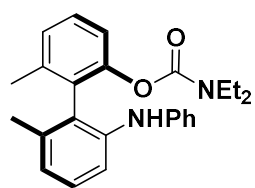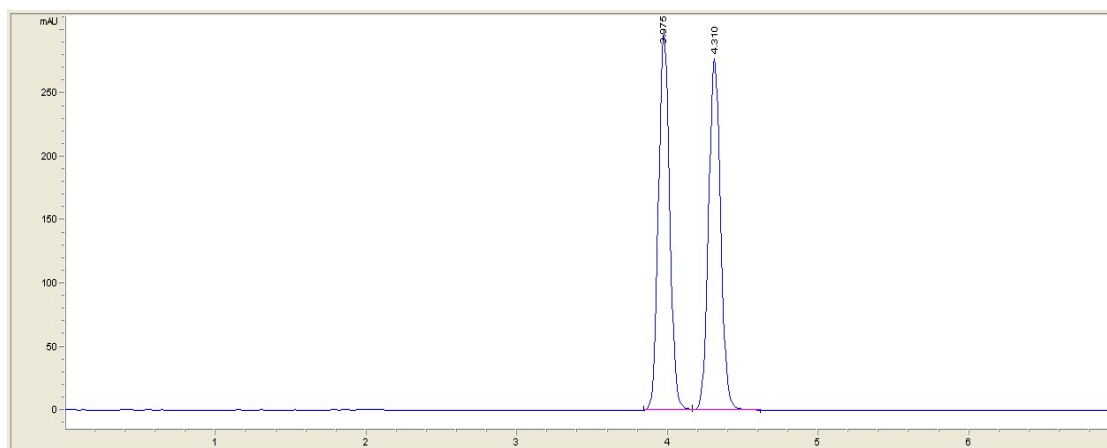

| Peak # | RetTime [min] | Area [mAU*s] | Height [mAU] | Width [min] | Symmetry [%] | Area [%] |
|--------|---------------|--------------|--------------|-------------|--------------|----------|
| 1      | 3.975         | 1534.9       | 297.1        | 0.0803      | 0.912        | 49.881   |
| 2      | 4.31          | 1542.2       | 277.6        | 0.0868      | 0.91         | 50.119   |

**Figure S405. HPLC Spectra of racemic 100**

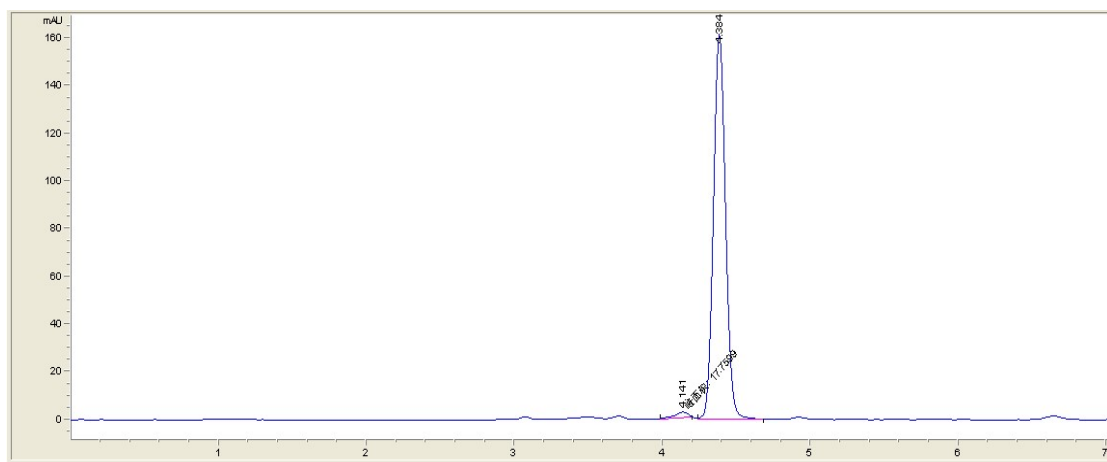

| Peak # | RetTime [min] | Area [mAU*s] | Height [mAU] | Width [min] | Symmetry [%] | Area [%] |
|--------|---------------|--------------|--------------|-------------|--------------|----------|
| 1      | 4.141         | 17.8         | 2.5          | 0.1191      | 2.364        | 1.850    |
| 2      | 4.384         | 942          | 161.9        | 0.0899      | 0.901        | 98.150   |

**Figure S406. HPLC Spectra of 100**



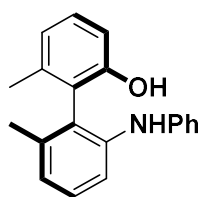

101

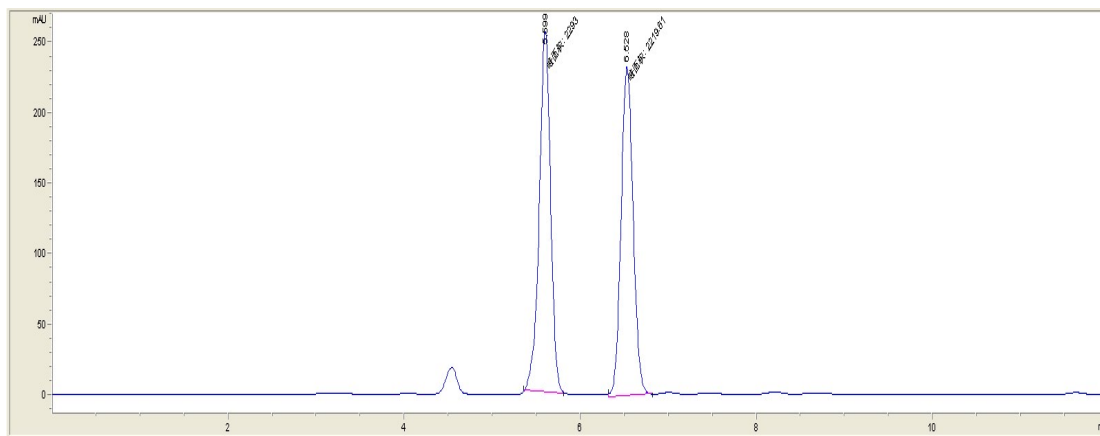

| Peak # | RetTime [min] | Area [mAU*s] | Height [mAU] | Width [min] | Symmetry [%] | Area [%] |
|--------|---------------|--------------|--------------|-------------|--------------|----------|
| 1      | 5.599         | 2293         | 256.1        | 0.1492      | 1.065        | 50.813   |
| 2      | 6.528         | 2219.6       | 233.5        | 0.1584      | 0.907        | 49.187   |

Figure S407. HPLC Spectra of racemic 101

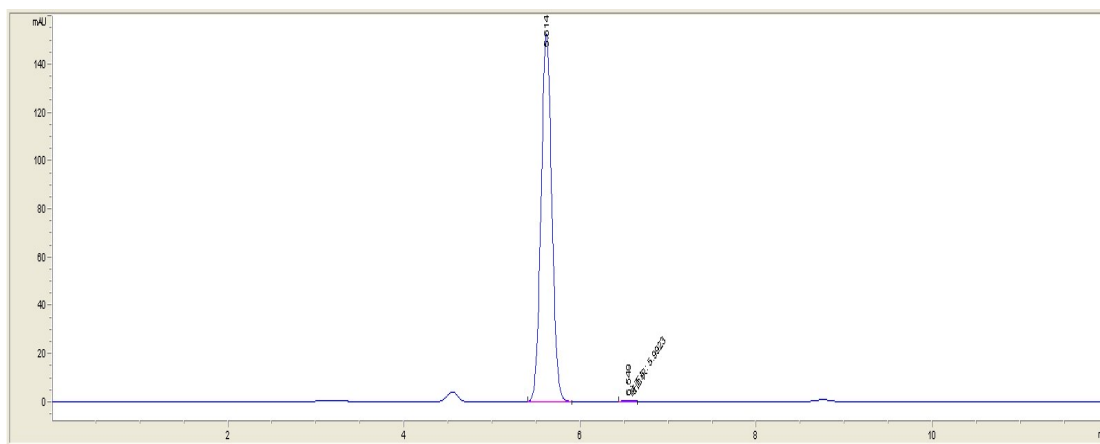

| Peak # | RetTime [min] | Area [mAU*s] | Height [mAU] | Width [min] | Symmetry [%] | Area [%] |
|--------|---------------|--------------|--------------|-------------|--------------|----------|
| 1      | 5.614         | 1301.1       | 152.8        | 0.1313      | 0.945        | 99.542   |
| 2      | 6.549         | 6            | 7.4E-1       | 0.1355      | 0.972        | 0.458    |

Figure S408. HPLC Spectra of 101

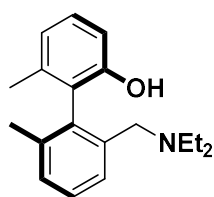

102

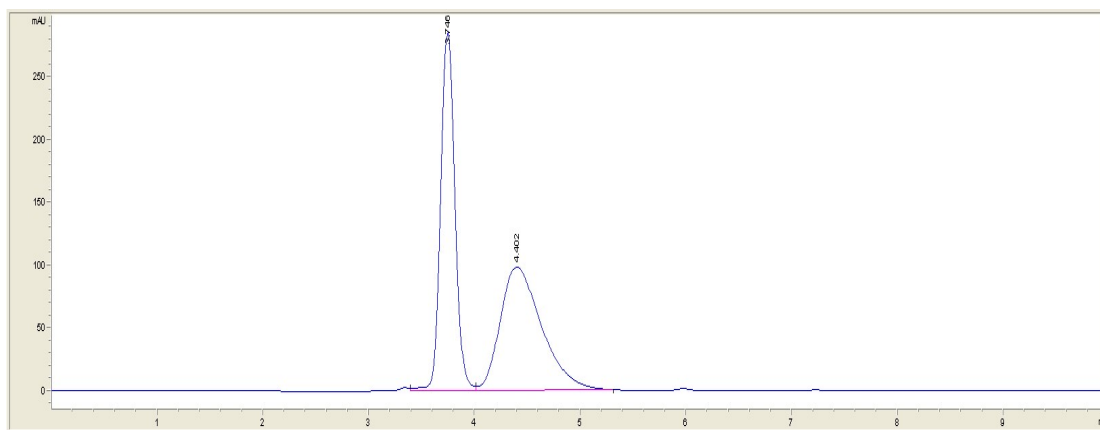

| Peak # | RetTime [min] | Area [mAU*s] | Height [mAU] | Width [min] | Symmetry [%] | Area [%] |
|--------|---------------|--------------|--------------|-------------|--------------|----------|
| 1      | 3.746         | 2677.7       | 285.6        | 0.1454      | 0.918        | 49.858   |
| 2      | 4.402         | 2693         | 98.4         | 0.4194      | 0.635        | 50.142   |

Figure S409. HPLC Spectra of racemic 102

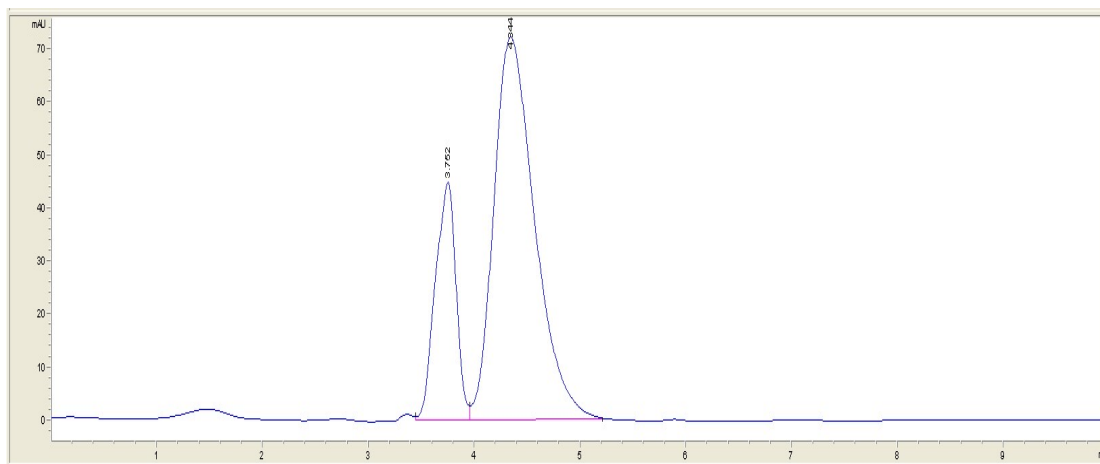

| Peak # | RetTime [min] | Area [mAU*s] | Height [mAU] | Width [min] | Symmetry [%] | Area [%] |
|--------|---------------|--------------|--------------|-------------|--------------|----------|
| 1      | 3.752         | 617.6        | 45           | 0.2002      | 1.479        | 24.093   |
| 2      | 4.344         | 1945.7       | 72.3         | 0.4121      | 0.662        | 75.907   |

Figure S410. HPLC Spectra of 102

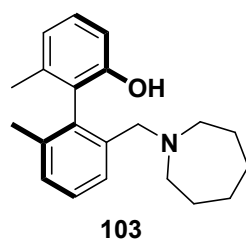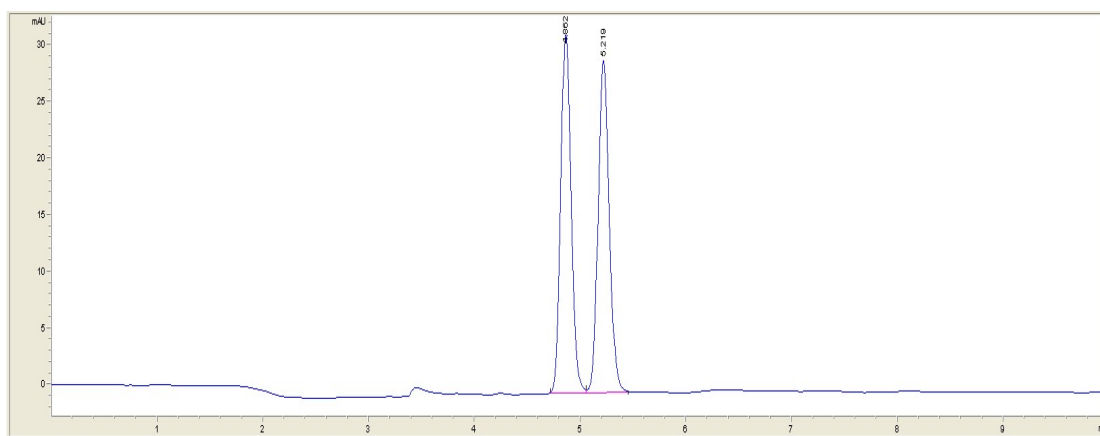

| Peak # | RetTime [min] | Area [mAU*s] | Height [mAU] | Width [min] | Symmetry | Area [%] |
|--------|---------------|--------------|--------------|-------------|----------|----------|
| 1      | 4.862         | 217.7        | 31.8         | 0.106       | 0.852    | 50.080   |
| 2      | 5.219         | 217          | 29.4         | 0.1142      | 0.851    | 49.920   |

**Figure S411. HPLC Spectra of racemic 103**

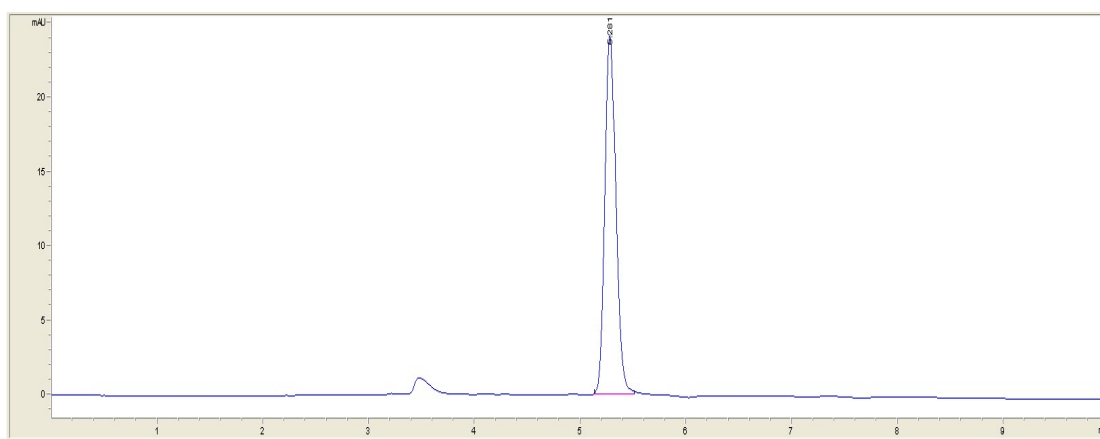

| Peak # | RetTime [min] | Area [mAU*s] | Height [mAU] | Width [min] | Symmetry | Area [%] |
|--------|---------------|--------------|--------------|-------------|----------|----------|
| 1      | 5.281         | 176.9        | 24.2         | 0.1133      | 0.837    | 100.000  |

**Figure S412. HPLC Spectra of 103**

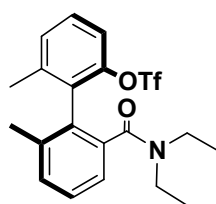

**104**

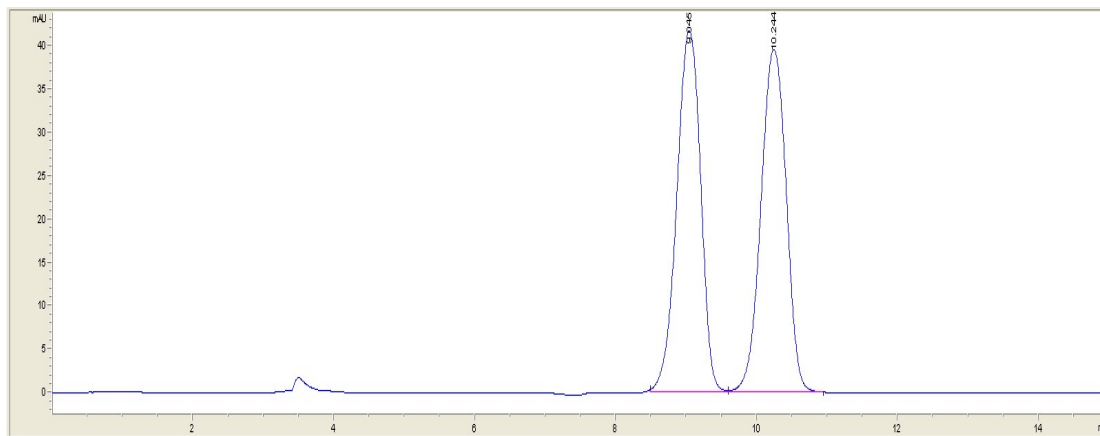

| Peak # | RetTime [min] | Area [mAU*s] | Height [mAU] | Width [min] | Symmetry | Area [%] |
|--------|---------------|--------------|--------------|-------------|----------|----------|
| 1      | 9.045         | 985.1        | 41.7         | 0.3754      | 1.09     | 49.907   |
| 2      | 10.244        | 988.7        | 39.6         | 0.3975      | 1.017    | 50.093   |

**Figure S413. HPLC Spectra of racemic 104**

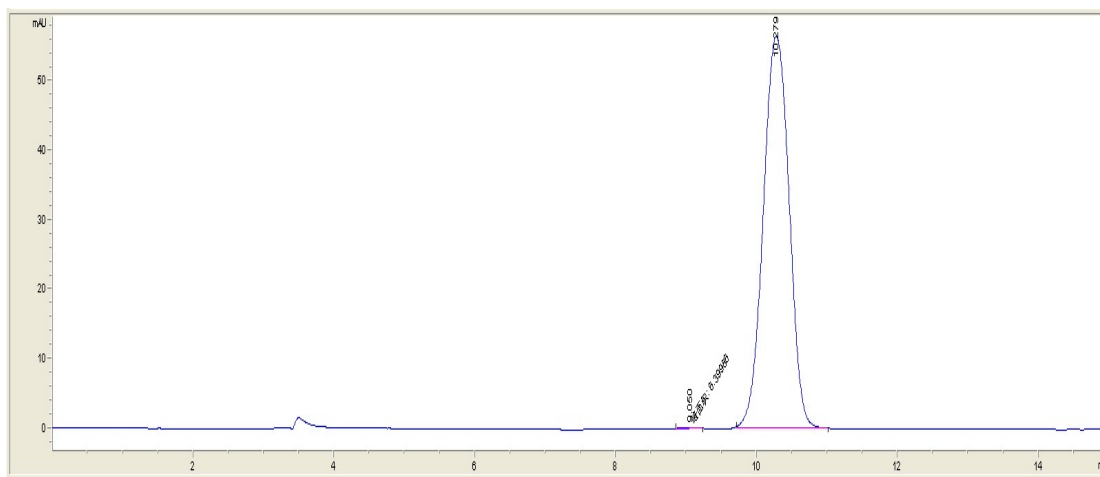

| Peak # | RetTime [min] | Area [mAU*s] | Height [mAU] | Width [min] | Symmetry | Area [%] |
|--------|---------------|--------------|--------------|-------------|----------|----------|
| 1      | 9.05          | 6.4          | 3.4E-1       | 0.3123      | 1.227    | 0.441    |
| 2      | 10.279        | 1444.3       | 56.6         | 0.4079      | 0.98     | 99.559   |

**Figure S414. HPLC Spectra of 104**
